# Supplementary material for: CELSR3 mRNA expression is increased in hepatocellular carcinoma and indicates poor prognosis
Source: PeerJ journal article supplement (doi:10.7717/peerj.7816), 2019-10-07
Supplement: The_complete_GSEA_results_of_CCLE.zip [file The_complete_GSEA_results_of_CCLE.zip]

NAME	GS<br> follow link to MSigDB	GS DETAILS	SIZE	ES	NES	NOM p-val	FDR q-val	FWER p-val	RANK AT MAX	LEADING EDGE
GO_SOMATIC_DIVERSIFICATION_OF_IMMUNOGLOBULINS	GO_SOMATIC_DIVERSIFICATION_OF_IMMUNOGLOBULINS	Details ...	28	0.72148037	1.8237225	0.0	0.33480194	0.278	9433	tags=61%, list=17%, signal=73%
GO_IMMUNOGLOBULIN_PRODUCTION_INVOLVED_IN_IMMUNOGLOBULIN_MEDIATED_IMMUNE_RESPONSE	GO_IMMUNOGLOBULIN_PRODUCTION_INVOLVED_IN_IMMUNOGLOBULIN_MEDIATED_IMMUNE_RESPONSE	Details ...	22	0.695541	1.7776707	0.0	0.42462796	0.489	10293	tags=59%, list=19%, signal=73%
GO_TRANSCRIPTION_FROM_RNA_POLYMERASE_I_PROMOTER	GO_TRANSCRIPTION_FROM_RNA_POLYMERASE_I_PROMOTER	Details ...	35	0.6882072	1.7659869	0.0	0.3589046	0.535	11322	tags=71%, list=21%, signal=90%
GO_CELLULAR_PROTEIN_COMPLEX_DISASSEMBLY	GO_CELLULAR_PROTEIN_COMPLEX_DISASSEMBLY	Details ...	121	0.5969618	1.7625084	0.006	0.28945026	0.547	12797	tags=60%, list=24%, signal=78%
GO_RNA_METHYLTRANSFERASE_ACTIVITY	GO_RNA_METHYLTRANSFERASE_ACTIVITY	Details ...	43	0.6791422	1.7574738	0.0	0.2541814	0.572	9532	tags=63%, list=18%, signal=76%
GO_RRNA_TRANSCRIPTION	GO_RRNA_TRANSCRIPTION	Details ...	18	0.75895554	1.7538557	0.0	0.22504269	0.593	7120	tags=61%, list=13%, signal=70%
GO_TRNA_METABOLIC_PROCESS	GO_TRNA_METABOLIC_PROCESS	Details ...	169	0.6423913	1.7407322	0.002004008	0.24048038	0.646	12847	tags=66%, list=24%, signal=86%
GO_NCRNA_PROCESSING	GO_NCRNA_PROCESSING	Details ...	374	0.6475115	1.7369195	0.0019723866	0.22165635	0.659	11861	tags=64%, list=22%, signal=82%
GO_TRNA_PROCESSING	GO_TRNA_PROCESSING	Details ...	108	0.65219086	1.7354907	0.0	0.2022494	0.662	9532	tags=58%, list=18%, signal=71%
GO_RRNA_MODIFICATION	GO_RRNA_MODIFICATION	Details ...	27	0.75394964	1.7347959	0.0020120724	0.18391651	0.666	11820	tags=89%, list=22%, signal=114%
GO_TRANSLATIONAL_TERMINATION	GO_TRANSLATIONAL_TERMINATION	Details ...	92	0.6418925	1.7327881	0.00996016	0.17238331	0.673	12797	tags=65%, list=24%, signal=85%
GO_RNA_METHYLATION	GO_RNA_METHYLATION	Details ...	51	0.6514192	1.7220308	0.0	0.19141287	0.724	12603	tags=69%, list=23%, signal=89%
GO_RRNA_METHYLATION	GO_RRNA_METHYLATION	Details ...	19	0.74010146	1.7206879	0.0019607844	0.1802415	0.734	11820	tags=84%, list=22%, signal=108%
GO_MITOCHONDRIAL_TRANSLATION	GO_MITOCHONDRIAL_TRANSLATION	Details ...	107	0.6437952	1.7151883	0.011976048	0.18423699	0.745	12797	tags=65%, list=24%, signal=85%
GO_TRNA_METHYLTRANSFERASE_ACTIVITY	GO_TRNA_METHYLTRANSFERASE_ACTIVITY	Details ...	19	0.707539	1.7126831	0.002020202	0.17898636	0.756	12603	tags=68%, list=23%, signal=89%
GO_TRNA_MODIFICATION	GO_TRNA_MODIFICATION	Details ...	55	0.6776654	1.7059351	0.0020491802	0.18602134	0.776	9532	tags=56%, list=18%, signal=68%
GO_RRNA_METHYLTRANSFERASE_ACTIVITY	GO_RRNA_METHYLTRANSFERASE_ACTIVITY	Details ...	15	0.7439707	1.7034525	0.001980198	0.18213506	0.778	9452	tags=73%, list=17%, signal=89%
GO_RRNA_METABOLIC_PROCESS	GO_RRNA_METABOLIC_PROCESS	Details ...	254	0.66689754	1.7025299	0.002004008	0.17500491	0.782	9809	tags=62%, list=18%, signal=75%
GO_SOMATIC_DIVERSIFICATION_OF_IMMUNE_RECEPTORS	GO_SOMATIC_DIVERSIFICATION_OF_IMMUNE_RECEPTORS	Details ...	41	0.67317456	1.7005836	0.0	0.17092378	0.79	9433	tags=56%, list=17%, signal=68%
GO_RRNA_BINDING	GO_RRNA_BINDING	Details ...	58	0.6719597	1.698994	0.003992016	0.16583331	0.797	11875	tags=72%, list=22%, signal=93%
GO_SOMATIC_RECOMBINATION_OF_IMMUNOGLOBULIN_GENE_SEGMENTS	GO_SOMATIC_RECOMBINATION_OF_IMMUNOGLOBULIN_GENE_SEGMENTS	Details ...	21	0.68448484	1.691488	0.0019569471	0.17620459	0.824	9433	tags=52%, list=17%, signal=63%
GO_TELOMERE_MAINTENANCE_VIA_TELOMERASE	GO_TELOMERE_MAINTENANCE_VIA_TELOMERASE	Details ...	17	0.6998916	1.6841301	0.003937008	0.18938291	0.843	7007	tags=65%, list=13%, signal=74%
GO_RIBOSOME_BIOGENESIS	GO_RIBOSOME_BIOGENESIS	Details ...	304	0.654589	1.6838526	0.005964215	0.1818914	0.843	9809	tags=61%, list=18%, signal=74%
GO_TRNA_METHYLATION	GO_TRNA_METHYLATION	Details ...	21	0.6943225	1.6835316	0.002004008	0.17507772	0.843	12603	tags=62%, list=23%, signal=81%
GO_IMMUNOGLOBULIN_PRODUCTION	GO_IMMUNOGLOBULIN_PRODUCTION	Details ...	45	0.58153075	1.6829165	0.0	0.16982275	0.847	10293	tags=49%, list=19%, signal=60%
GO_ISOTYPE_SWITCHING	GO_ISOTYPE_SWITCHING	Details ...	16	0.7267984	1.6828659	0.002020202	0.163469	0.847	9433	tags=56%, list=17%, signal=68%
GO_RNA_SPLICING_VIA_ENDONUCLEOLYTIC_CLEAVAGE_AND_LIGATION	GO_RNA_SPLICING_VIA_ENDONUCLEOLYTIC_CLEAVAGE_AND_LIGATION	Details ...	15	0.6948131	1.6714439	0.0	0.18694322	0.863	8472	tags=60%, list=16%, signal=71%
GO_TRNA_SPECIFIC_RIBONUCLEASE_ACTIVITY	GO_TRNA_SPECIFIC_RIBONUCLEASE_ACTIVITY	Details ...	16	0.69850576	1.6607592	0.006134969	0.2098109	0.893	9282	tags=69%, list=17%, signal=83%
GO_TRANSLATIONAL_ELONGATION	GO_TRANSLATIONAL_ELONGATION	Details ...	111	0.5901584	1.6578153	0.014084507	0.21211614	0.896	12797	tags=62%, list=24%, signal=81%
GO_PRERIBOSOME_LARGE_SUBUNIT_PRECURSOR	GO_PRERIBOSOME_LARGE_SUBUNIT_PRECURSOR	Details ...	21	0.757326	1.6571599	0.011952192	0.20677815	0.897	6892	tags=71%, list=13%, signal=82%
GO_RIBONUCLEOPROTEIN_COMPLEX_BIOGENESIS	GO_RIBONUCLEOPROTEIN_COMPLEX_BIOGENESIS	Details ...	427	0.62976605	1.655337	0.016	0.20507613	0.902	11915	tags=62%, list=22%, signal=79%
GO_RNA_DEPENDENT_DNA_BIOSYNTHETIC_PROCESS	GO_RNA_DEPENDENT_DNA_BIOSYNTHETIC_PROCESS	Details ...	21	0.6544142	1.6542755	0.005964215	0.20158988	0.904	7007	tags=57%, list=13%, signal=66%
GO_RNA_MODIFICATION	GO_RNA_MODIFICATION	Details ...	113	0.61082953	1.6516391	0.006085193	0.20277242	0.909	11820	tags=61%, list=22%, signal=78%
GO_PRERIBOSOME	GO_PRERIBOSOME	Details ...	61	0.6956493	1.6500841	0.016260162	0.20084935	0.913	7034	tags=62%, list=13%, signal=71%
GO_AMINO_ACID_ACTIVATION	GO_AMINO_ACID_ACTIVATION	Details ...	52	0.65856564	1.6486993	0.017928287	0.19880563	0.917	12082	tags=65%, list=22%, signal=84%
GO_CYTOCHROME_COMPLEX	GO_CYTOCHROME_COMPLEX	Details ...	21	0.68645597	1.6444148	0.013972056	0.20481013	0.93	6376	tags=52%, list=12%, signal=59%
GO_LIGASE_ACTIVITY_FORMING_CARBON_OXYGEN_BONDS	GO_LIGASE_ACTIVITY_FORMING_CARBON_OXYGEN_BONDS	Details ...	44	0.6659628	1.6432621	0.01814516	0.20213258	0.931	11859	tags=64%, list=22%, signal=81%
GO_RIBOSOME	GO_RIBOSOME	Details ...	223	0.6243926	1.6387337	0.0040983604	0.209045	0.936	12797	tags=66%, list=24%, signal=86%
GO_SMALL_RIBOSOMAL_SUBUNIT	GO_SMALL_RIBOSOMAL_SUBUNIT	Details ...	67	0.6762077	1.638691	0.015655577	0.20376629	0.936	13273	tags=70%, list=24%, signal=93%
GO_NUCLEOLAR_PART	GO_NUCLEOLAR_PART	Details ...	62	0.6725081	1.63233	0.020366598	0.21676739	0.947	8840	tags=65%, list=16%, signal=77%
GO_RIBOSOMAL_LARGE_SUBUNIT_BIOGENESIS	GO_RIBOSOMAL_LARGE_SUBUNIT_BIOGENESIS	Details ...	48	0.68795127	1.6305028	0.023622047	0.21701421	0.947	10232	tags=71%, list=19%, signal=87%
GO_NUCLEOBASE_CONTAINING_SMALL_MOLECULE_INTERCONVERSION	GO_NUCLEOBASE_CONTAINING_SMALL_MOLECULE_INTERCONVERSION	Details ...	20	0.65249246	1.6275095	0.014767933	0.22004896	0.95	5619	tags=40%, list=10%, signal=45%
GO_ENDONUCLEASE_ACTIVITY	GO_ENDONUCLEASE_ACTIVITY	Details ...	121	0.50702584	1.6261668	0.003992016	0.21885721	0.953	12706	tags=55%, list=23%, signal=71%
GO_TELOMERE_MAINTENANCE_VIA_TELOMERE_LENGTHENING	GO_TELOMERE_MAINTENANCE_VIA_TELOMERE_LENGTHENING	Details ...	26	0.6395346	1.6244816	0.009708738	0.21832141	0.954	12148	tags=69%, list=22%, signal=89%
GO_GLYCOSYL_COMPOUND_BIOSYNTHETIC_PROCESS	GO_GLYCOSYL_COMPOUND_BIOSYNTHETIC_PROCESS	Details ...	114	0.4844687	1.6229879	0.006024096	0.2176754	0.955	12936	tags=51%, list=24%, signal=67%
GO_GTP_METABOLIC_PROCESS	GO_GTP_METABOLIC_PROCESS	Details ...	21	0.5983924	1.6224326	0.00814664	0.21449588	0.955	5316	tags=43%, list=10%, signal=47%
GO_PURINE_NUCLEOSIDE_MONOPHOSPHATE_BIOSYNTHETIC_PROCESS	GO_PURINE_NUCLEOSIDE_MONOPHOSPHATE_BIOSYNTHETIC_PROCESS	Details ...	59	0.54219943	1.6192114	0.008130081	0.21931082	0.959	13445	tags=54%, list=25%, signal=72%
GO_MATURATION_OF_SSU_RRNA	GO_MATURATION_OF_SSU_RRNA	Details ...	41	0.6793585	1.617786	0.011976048	0.21854444	0.959	14599	tags=83%, list=27%, signal=113%
GO_EXOSOME_RNASE_COMPLEX_	GO_EXOSOME_RNASE_COMPLEX_	Details ...	21	0.68184316	1.6167498	0.023529412	0.21677454	0.96	9082	tags=57%, list=17%, signal=69%
GO_ORGANELLAR_SMALL_RIBOSOMAL_SUBUNIT	GO_ORGANELLAR_SMALL_RIBOSOMAL_SUBUNIT	Details ...	25	0.6709296	1.6159343	0.021568628	0.21441954	0.96	15321	tags=80%, list=28%, signal=111%
GO_RIBOSOMAL_SUBUNIT	GO_RIBOSOMAL_SUBUNIT	Details ...	161	0.65535873	1.6103855	0.022132797	0.22598073	0.969	12797	tags=70%, list=24%, signal=91%
GO_DNA_REPAIR_COMPLEX	GO_DNA_REPAIR_COMPLEX	Details ...	42	0.64619654	1.608318	0.01004016	0.22723027	0.971	4419	tags=38%, list=8%, signal=41%
GO_NUCLEOSIDE_MONOPHOSPHATE_BIOSYNTHETIC_PROCESS	GO_NUCLEOSIDE_MONOPHOSPHATE_BIOSYNTHETIC_PROCESS	Details ...	80	0.52228767	1.6077212	0.004032258	0.22458215	0.972	12936	tags=52%, list=24%, signal=69%
GO_INTRAMOLECULAR_TRANSFERASE_ACTIVITY	GO_INTRAMOLECULAR_TRANSFERASE_ACTIVITY	Details ...	26	0.5672377	1.6072465	0.008080808	0.22168382	0.972	13231	tags=65%, list=24%, signal=86%
GO_SOMATIC_CELL_DNA_RECOMBINATION	GO_SOMATIC_CELL_DNA_RECOMBINATION	Details ...	33	0.63651323	1.6047999	0.001996008	0.22396262	0.975	9433	tags=52%, list=17%, signal=62%
GO_MATURATION_OF_SSU_RRNA_FROM_TRICISTRONIC_RRNA_TRANSCRIPT_SSU_RRNA_5_8S_RRNA_LSU_RRNA_	GO_MATURATION_OF_SSU_RRNA_FROM_TRICISTRONIC_RRNA_TRANSCRIPT_SSU_RRNA_5_8S_RRNA_LSU_RRNA_	Details ...	33	0.6849197	1.6014605	0.019880716	0.22903006	0.976	14220	tags=85%, list=26%, signal=115%
GO_SNORNA_BINDING	GO_SNORNA_BINDING	Details ...	26	0.71805793	1.595852	0.026530612	0.24063274	0.978	6633	tags=65%, list=12%, signal=74%
GO_AMIDE_BIOSYNTHETIC_PROCESS	GO_AMIDE_BIOSYNTHETIC_PROCESS	Details ...	499	0.5155118	1.5913128	0.010121457	0.2492621	0.981	12797	tags=54%, list=24%, signal=70%
GO_DEOXYRIBONUCLEOSIDE_TRIPHOSPHATE_METABOLIC_PROCESS	GO_DEOXYRIBONUCLEOSIDE_TRIPHOSPHATE_METABOLIC_PROCESS	Details ...	16	0.6603236	1.5858243	0.022774328	0.26133817	0.987	12110	tags=63%, list=22%, signal=80%
GO_CYTOPLASMIC_TRANSLATION	GO_CYTOPLASMIC_TRANSLATION	Details ...	41	0.6717351	1.5844395	0.011904762	0.2611745	0.988	13936	tags=73%, list=26%, signal=98%
GO_ORGANELLAR_RIBOSOME	GO_ORGANELLAR_RIBOSOME	Details ...	71	0.5854898	1.5842992	0.036144577	0.2573315	0.988	12797	tags=61%, list=24%, signal=79%
GO_NUCLEOSIDE_TRIPHOSPHATE_BIOSYNTHETIC_PROCESS	GO_NUCLEOSIDE_TRIPHOSPHATE_BIOSYNTHETIC_PROCESS	Details ...	58	0.5319878	1.5833721	0.0	0.25581542	0.988	12936	tags=57%, list=24%, signal=75%
GO_STRUCTURAL_CONSTITUENT_OF_RIBOSOME	GO_STRUCTURAL_CONSTITUENT_OF_RIBOSOME	Details ...	207	0.6003682	1.5831707	0.028225806	0.25228608	0.988	12797	tags=64%, list=24%, signal=83%
GO_MATURATION_OF_5_8S_RRNA	GO_MATURATION_OF_5_8S_RRNA	Details ...	28	0.6906669	1.5787225	0.020449897	0.2622862	0.992	10232	tags=61%, list=19%, signal=75%
GO_TELOMERE_ORGANIZATION	GO_TELOMERE_ORGANIZATION	Details ...	104	0.54383343	1.578633	0.017821781	0.25850037	0.992	12612	tags=53%, list=23%, signal=69%
GO_SMALL_SUBUNIT_PROCESSOME	GO_SMALL_SUBUNIT_PROCESSOME	Details ...	33	0.7031538	1.5781466	0.024640657	0.25595966	0.992	9056	tags=67%, list=17%, signal=80%
GO_RIBONUCLEOSIDE_TRIPHOSPHATE_BIOSYNTHETIC_PROCESS	GO_RIBONUCLEOSIDE_TRIPHOSPHATE_BIOSYNTHETIC_PROCESS	Details ...	46	0.5397133	1.577291	0.0062111802	0.25482172	0.992	12936	tags=61%, list=24%, signal=80%
GO_CYTOSOLIC_RIBOSOME	GO_CYTOSOLIC_RIBOSOME	Details ...	111	0.6817175	1.576796	0.040697675	0.25241536	0.992	10103	tags=66%, list=19%, signal=81%
GO_PROTON_TRANSPORTING_ATP_SYNTHASE_COMPLEX	GO_PROTON_TRANSPORTING_ATP_SYNTHASE_COMPLEX	Details ...	22	0.69148105	1.5742762	0.03285421	0.2553463	0.993	14840	tags=77%, list=27%, signal=106%
GO_CYTOSOLIC_PART	GO_CYTOSOLIC_PART	Details ...	217	0.5312275	1.5725919	0.028225806	0.256164	0.993	9773	tags=47%, list=18%, signal=58%
GO_EUKARYOTIC_TRANSLATION_INITIATION_FACTOR_3_COMPLEX	GO_EUKARYOTIC_TRANSLATION_INITIATION_FACTOR_3_COMPLEX		16	0.73999506	1.5688809	0.006024096	0.26346415	0.995	13066	tags=94%, list=24%, signal=123%
GO_NUCLEAR_EXOSOME_RNASE_COMPLEX_	GO_NUCLEAR_EXOSOME_RNASE_COMPLEX_		15	0.7159776	1.5675883	0.027559055	0.26394638	0.996	9082	tags=67%, list=17%, signal=80%
GO_REGULATION_OF_TRANSLATIONAL_ELONGATION	GO_REGULATION_OF_TRANSLATIONAL_ELONGATION		23	0.62819785	1.5653265	0.025590552	0.26679903	0.996	11859	tags=61%, list=22%, signal=78%
GO_CYTOSOLIC_SMALL_RIBOSOMAL_SUBUNIT	GO_CYTOSOLIC_SMALL_RIBOSOMAL_SUBUNIT		43	0.699005	1.5632511	0.032945737	0.2692874	0.996	14288	tags=77%, list=26%, signal=104%
GO_RIBOSOMAL_SMALL_SUBUNIT_BIOGENESIS	GO_RIBOSOMAL_SMALL_SUBUNIT_BIOGENESIS		57	0.65268385	1.5613438	0.01863354	0.2713582	0.997	14599	tags=77%, list=27%, signal=105%
GO_2_IRON_2_SULFUR_CLUSTER_BINDING	GO_2_IRON_2_SULFUR_CLUSTER_BINDING		23	0.592306	1.5583053	0.030737706	0.27669373	0.997	13862	tags=61%, list=26%, signal=82%
GO_CAJAL_BODY	GO_CAJAL_BODY		52	0.6264241	1.5568459	0.046653144	0.27731347	0.997	8857	tags=56%, list=16%, signal=67%
GO_LARGE_RIBOSOMAL_SUBUNIT	GO_LARGE_RIBOSOMAL_SUBUNIT		94	0.6412347	1.5533692	0.04208417	0.28427768	0.997	12765	tags=70%, list=24%, signal=92%
GO_PURINE_NUCLEOSIDE_BIOSYNTHETIC_PROCESS	GO_PURINE_NUCLEOSIDE_BIOSYNTHETIC_PROCESS		84	0.4777069	1.5507455	0.012345679	0.28832516	0.997	12936	tags=50%, list=24%, signal=66%
GO_ATP_BIOSYNTHETIC_PROCESS	GO_ATP_BIOSYNTHETIC_PROCESS		33	0.55959064	1.549533	0.020491803	0.28835618	0.997	12936	tags=61%, list=24%, signal=80%
GO_RNA_HELICASE_ACTIVITY	GO_RNA_HELICASE_ACTIVITY		67	0.61563057	1.5488741	0.029411765	0.28690043	0.997	10294	tags=55%, list=19%, signal=68%
GO_MACROMOLECULAR_COMPLEX_DISASSEMBLY	GO_MACROMOLECULAR_COMPLEX_DISASSEMBLY		180	0.49115816	1.5474309	0.027833002	0.28770745	0.997	12797	tags=51%, list=24%, signal=66%
GO_RETROMER_COMPLEX	GO_RETROMER_COMPLEX		21	0.5871339	1.5447253	0.028455285	0.2923182	0.998	7715	tags=48%, list=14%, signal=55%
GO_HISTONE_PHOSPHORYLATION	GO_HISTONE_PHOSPHORYLATION		25	0.6180931	1.5440534	0.014492754	0.29109228	0.998	12917	tags=64%, list=24%, signal=84%
GO_HISTONE_DEUBIQUITINATION	GO_HISTONE_DEUBIQUITINATION		21	0.6425188	1.5432193	0.027504912	0.2903886	0.998	10848	tags=62%, list=20%, signal=77%
GO_RNA_SECONDARY_STRUCTURE_UNWINDING	GO_RNA_SECONDARY_STRUCTURE_UNWINDING		40	0.6425296	1.5410979	0.03125	0.29349977	0.998	9398	tags=58%, list=17%, signal=69%
GO_TRANSCRIPTION_FROM_RNA_POLYMERASE_III_PROMOTER	GO_TRANSCRIPTION_FROM_RNA_POLYMERASE_III_PROMOTER		40	0.57367784	1.5407135	0.01417004	0.291229	0.998	14918	tags=60%, list=27%, signal=83%
GO_QUINONE_BINDING	GO_QUINONE_BINDING		16	0.6207045	1.540025	0.037037037	0.29017878	0.998	13369	tags=56%, list=25%, signal=75%
GO_RRNA_CATABOLIC_PROCESS	GO_RRNA_CATABOLIC_PROCESS		17	0.635325	1.5391855	0.029296875	0.2893697	0.998	14871	tags=82%, list=27%, signal=113%
GO_PSEUDOURIDINE_SYNTHESIS	GO_PSEUDOURIDINE_SYNTHESIS		17	0.71862715	1.5383443	0.03629032	0.28878728	0.998	13231	tags=88%, list=24%, signal=117%
GO_RNA_POLYMERASE_COMPLEX	GO_RNA_POLYMERASE_COMPLEX		119	0.5108894	1.5373529	0.04133858	0.28818384	0.998	12647	tags=53%, list=23%, signal=69%
GO_GUANOSINE_CONTAINING_COMPOUND_METABOLIC_PROCESS	GO_GUANOSINE_CONTAINING_COMPOUND_METABOLIC_PROCESS		44	0.47454345	1.5364635	0.014084507	0.28775284	0.998	6244	tags=36%, list=12%, signal=41%
GO_CYSTEINE_TYPE_ENDOPEPTIDASE_INHIBITOR_ACTIVITY_INVOLVED_IN_APOPTOTIC_PROCESS	GO_CYSTEINE_TYPE_ENDOPEPTIDASE_INHIBITOR_ACTIVITY_INVOLVED_IN_APOPTOTIC_PROCESS		23	0.53246576	1.5347545	0.018367346	0.28951353	0.999	9616	tags=43%, list=18%, signal=53%
GO_DNA_TEMPLATED_TRANSCRIPTION_ELONGATION	GO_DNA_TEMPLATED_TRANSCRIPTION_ELONGATION		91	0.51618004	1.5324385	0.040567953	0.2935352	0.999	11461	tags=44%, list=21%, signal=56%
GO_PROTEIN_PHOSPHATASE_TYPE_2A_COMPLEX	GO_PROTEIN_PHOSPHATASE_TYPE_2A_COMPLEX		20	0.60019165	1.5322601	0.04008016	0.29095292	0.999	13970	tags=45%, list=26%, signal=61%
GO_PURINE_CONTAINING_COMPOUND_SALVAGE	GO_PURINE_CONTAINING_COMPOUND_SALVAGE		16	0.64282566	1.5285426	0.034764826	0.29868564	0.999	4661	tags=38%, list=9%, signal=41%
GO_STRAND_DISPLACEMENT	GO_STRAND_DISPLACEMENT		26	0.6741998	1.5284677	0.031746034	0.2958082	0.999	9713	tags=62%, list=18%, signal=75%
GO_NUCLEASE_ACTIVITY	GO_NUCLEASE_ACTIVITY		194	0.4762698	1.5269159	0.01764706	0.29723653	0.999	12706	tags=51%, list=23%, signal=66%
GO_PRODUCTION_OF_MOLECULAR_MEDIATOR_OF_IMMUNE_RESPONSE	GO_PRODUCTION_OF_MOLECULAR_MEDIATOR_OF_IMMUNE_RESPONSE		62	0.48530224	1.5204291	0.00998004	0.31417984	0.999	10293	tags=44%, list=19%, signal=54%
GO_PROTEIN_LOCALIZATION_TO_ENDOPLASMIC_RETICULUM	GO_PROTEIN_LOCALIZATION_TO_ENDOPLASMIC_RETICULUM		123	0.5810361	1.5203284	0.055984557	0.31130302	0.999	14384	tags=67%, list=27%, signal=92%
GO_INTERSTRAND_CROSS_LINK_REPAIR	GO_INTERSTRAND_CROSS_LINK_REPAIR		43	0.57958263	1.5197339	0.03550296	0.31000856	0.999	16945	tags=70%, list=31%, signal=101%
GO_BLASTOCYST_GROWTH	GO_BLASTOCYST_GROWTH		17	0.6502497	1.5179554	0.03137255	0.3126201	0.999	10551	tags=59%, list=19%, signal=73%
GO_DEOXYRIBONUCLEASE_ACTIVITY	GO_DEOXYRIBONUCLEASE_ACTIVITY		65	0.521918	1.5176871	0.03219697	0.31043452	0.999	12635	tags=58%, list=23%, signal=76%
GO_PURINE_NTP_DEPENDENT_HELICASE_ACTIVITY	GO_PURINE_NTP_DEPENDENT_HELICASE_ACTIVITY		97	0.5886568	1.517404	0.045454547	0.30831128	0.999	9709	tags=48%, list=18%, signal=59%
GO_RNA_PHOSPHODIESTER_BOND_HYDROLYSIS	GO_RNA_PHOSPHODIESTER_BOND_HYDROLYSIS		110	0.5161164	1.5165274	0.033398822	0.30800548	0.999	13950	tags=55%, list=26%, signal=73%
GO_ESTABLISHMENT_OF_PROTEIN_LOCALIZATION_TO_ENDOPLASMIC_RETICULUM	GO_ESTABLISHMENT_OF_PROTEIN_LOCALIZATION_TO_ENDOPLASMIC_RETICULUM		104	0.6383252	1.5161408	0.05222437	0.30619562	0.999	14384	tags=72%, list=27%, signal=98%
GO_TRANSLATIONAL_INITIATION	GO_TRANSLATIONAL_INITIATION		143	0.6275891	1.5141927	0.058708414	0.30921105	0.999	14299	tags=75%, list=26%, signal=101%
GO_MITOCHONDRIAL_ATP_SYNTHESIS_COUPLED_PROTON_TRANSPORT	GO_MITOCHONDRIAL_ATP_SYNTHESIS_COUPLED_PROTON_TRANSPORT		17	0.6967583	1.513367	0.056016598	0.30899873	0.999	12936	tags=76%, list=24%, signal=100%
GO_BASAL_TRANSCRIPTION_MACHINERY_BINDING	GO_BASAL_TRANSCRIPTION_MACHINERY_BINDING		23	0.6195857	1.512462	0.04347826	0.3090621	0.999	11505	tags=52%, list=21%, signal=66%
GO_NUCLEOSIDE_DIPHOSPHATE_KINASE_ACTIVITY	GO_NUCLEOSIDE_DIPHOSPHATE_KINASE_ACTIVITY		15	0.5816362	1.5122586	0.02385686	0.30690104	0.999	6600	tags=47%, list=12%, signal=53%
GO_TRNA_BINDING	GO_TRNA_BINDING		43	0.6228762	1.5122072	0.06012024	0.30426285	0.999	12409	tags=67%, list=23%, signal=87%
GO_POSITIVE_REGULATION_OF_GENE_EXPRESSION_EPIGENETIC	GO_POSITIVE_REGULATION_OF_GENE_EXPRESSION_EPIGENETIC		77	0.5312179	1.511362	0.041666668	0.3039988	0.999	14539	tags=53%, list=27%, signal=73%
GO_REGULATION_OF_VIRAL_INDUCED_CYTOPLASMIC_PATTERN_RECOGNITION_RECEPTOR_SIGNALING_PATHWAY	GO_REGULATION_OF_VIRAL_INDUCED_CYTOPLASMIC_PATTERN_RECOGNITION_RECEPTOR_SIGNALING_PATHWAY		15	0.66507274	1.5107154	0.04771372	0.30307373	0.999	8126	tags=60%, list=15%, signal=71%
GO_CARBOXY_TERMINAL_DOMAIN_PROTEIN_KINASE_COMPLEX	GO_CARBOXY_TERMINAL_DOMAIN_PROTEIN_KINASE_COMPLEX		22	0.62704396	1.5105947	0.043841336	0.30069998	0.999	8574	tags=55%, list=16%, signal=65%
GO_RNA_POLYMERASE_ACTIVITY	GO_RNA_POLYMERASE_ACTIVITY		43	0.57268596	1.5101702	0.049407113	0.29926866	0.999	12647	tags=56%, list=23%, signal=73%
GO_DNA_TEMPLATED_TRANSCRIPTION_TERMINATION	GO_DNA_TEMPLATED_TRANSCRIPTION_TERMINATION		100	0.5985027	1.5078154	0.049281314	0.30341133	0.999	13483	tags=58%, list=25%, signal=77%
GO_DNA_DIRECTED_RNA_POLYMERASE_III_COMPLEX	GO_DNA_DIRECTED_RNA_POLYMERASE_III_COMPLEX		18	0.59647876	1.5077044	0.04761905	0.30119625	0.999	10595	tags=56%, list=20%, signal=69%
GO_HISTONE_MONOUBIQUITINATION	GO_HISTONE_MONOUBIQUITINATION		23	0.5767641	1.5061777	0.03984064	0.30304623	0.999	15048	tags=65%, list=28%, signal=90%
GO_NEGATIVE_REGULATION_OF_TELOMERE_MAINTENANCE	GO_NEGATIVE_REGULATION_OF_TELOMERE_MAINTENANCE		26	0.6159261	1.5061145	0.035714287	0.30070633	0.999	12175	tags=50%, list=22%, signal=64%
GO_PYRIMIDINE_NUCLEOSIDE_TRIPHOSPHATE_METABOLIC_PROCESS	GO_PYRIMIDINE_NUCLEOSIDE_TRIPHOSPHATE_METABOLIC_PROCESS		19	0.5716889	1.505535	0.024096385	0.2998098	0.999	6600	tags=53%, list=12%, signal=60%
GO_ENDODEOXYRIBONUCLEASE_ACTIVITY	GO_ENDODEOXYRIBONUCLEASE_ACTIVITY		49	0.5361789	1.5026348	0.035019454	0.30582693	0.999	12608	tags=61%, list=23%, signal=80%
GO_RIBONUCLEASE_ACTIVITY	GO_RIBONUCLEASE_ACTIVITY		92	0.49560833	1.5023732	0.03515625	0.3039553	0.999	13950	tags=54%, list=26%, signal=73%
GO_NUCLEOTIDYLTRANSFERASE_ACTIVITY	GO_NUCLEOTIDYLTRANSFERASE_ACTIVITY		123	0.4965955	1.5021708	0.028571429	0.30211034	0.999	13080	tags=53%, list=24%, signal=69%
GO_FORMATION_OF_TRANSLATION_PREINITIATION_COMPLEX	GO_FORMATION_OF_TRANSLATION_PREINITIATION_COMPLEX		20	0.700788	1.5007759	0.043209877	0.30374736	0.999	13066	tags=80%, list=24%, signal=105%
GO_NEGATIVE_REGULATION_OF_TELOMERASE_ACTIVITY	GO_NEGATIVE_REGULATION_OF_TELOMERASE_ACTIVITY		15	0.5985086	1.4991922	0.04338843	0.3057675	0.999	12606	tags=53%, list=23%, signal=69%
GO_MATURATION_OF_5_8S_RRNA_FROM_TRICISTRONIC_RRNA_TRANSCRIPT_SSU_RRNA_5_8S_RRNA_LSU_RRNA_	GO_MATURATION_OF_5_8S_RRNA_FROM_TRICISTRONIC_RRNA_TRANSCRIPT_SSU_RRNA_5_8S_RRNA_LSU_RRNA_		19	0.6894805	1.4973285	0.04048583	0.30857864	0.999	9082	tags=58%, list=17%, signal=70%
GO_REGULATION_OF_NECROTIC_CELL_DEATH	GO_REGULATION_OF_NECROTIC_CELL_DEATH		25	0.5812734	1.4973	0.044315994	0.30622372	0.999	10928	tags=56%, list=20%, signal=70%
GO_RIBONUCLEOPROTEIN_COMPLEX_SUBUNIT_ORGANIZATION	GO_RIBONUCLEOPROTEIN_COMPLEX_SUBUNIT_ORGANIZATION		189	0.566508	1.4963719	0.044088177	0.30662256	0.999	13066	tags=60%, list=24%, signal=79%
GO_NUCLEAR_TRANSCRIBED_MRNA_CATABOLIC_PROCESS_NONSENSE_MEDIATED_DECAY	GO_NUCLEAR_TRANSCRIBED_MRNA_CATABOLIC_PROCESS_NONSENSE_MEDIATED_DECAY		118	0.6289032	1.4955554	0.06496063	0.30657563	0.999	14299	tags=69%, list=26%, signal=93%
GO_PYRIMIDINE_RIBONUCLEOTIDE_METABOLIC_PROCESS	GO_PYRIMIDINE_RIBONUCLEOTIDE_METABOLIC_PROCESS		22	0.5279398	1.4945836	0.020120725	0.3068337	0.999	6311	tags=41%, list=12%, signal=46%
GO_TRANSLATION_PREINITIATION_COMPLEX	GO_TRANSLATION_PREINITIATION_COMPLEX		16	0.73785794	1.4938054	0.026584867	0.30663785	0.999	14237	tags=100%, list=26%, signal=136%
GO_SMALL_NUCLEOLAR_RIBONUCLEOPROTEIN_COMPLEX	GO_SMALL_NUCLEOLAR_RIBONUCLEOPROTEIN_COMPLEX		19	0.71265954	1.4935511	0.053497944	0.30504823	0.999	12691	tags=74%, list=23%, signal=96%
GO_RNA_CATABOLIC_PROCESS	GO_RNA_CATABOLIC_PROCESS		221	0.5506946	1.491688	0.04684318	0.30817708	0.999	14299	tags=60%, list=26%, signal=81%
GO_ORGANELLAR_LARGE_RIBOSOMAL_SUBUNIT	GO_ORGANELLAR_LARGE_RIBOSOMAL_SUBUNIT		32	0.5606771	1.4910916	0.048879836	0.3074878	0.999	12765	tags=59%, list=24%, signal=78%
GO_NCRNA_TRANSCRIPTION	GO_NCRNA_TRANSCRIPTION		84	0.5301237	1.4903631	0.04637097	0.30745566	0.999	15574	tags=61%, list=29%, signal=85%
GO_NEGATIVE_REGULATION_OF_PHOSPHOPROTEIN_PHOSPHATASE_ACTIVITY	GO_NEGATIVE_REGULATION_OF_PHOSPHOPROTEIN_PHOSPHATASE_ACTIVITY		15	0.5550983	1.4898001	0.02584493	0.30687302	0.999	12500	tags=60%, list=23%, signal=78%
GO_DNA_BIOSYNTHETIC_PROCESS	GO_DNA_BIOSYNTHETIC_PROCESS		113	0.52994007	1.489152	0.04191617	0.30646172	0.999	12148	tags=52%, list=22%, signal=67%
GO_RIBOSOME_ASSEMBLY	GO_RIBOSOME_ASSEMBLY		53	0.6072764	1.4886427	0.065868266	0.30560413	0.999	12969	tags=74%, list=24%, signal=97%
GO_CLEAVAGE_INVOLVED_IN_RRNA_PROCESSING	GO_CLEAVAGE_INVOLVED_IN_RRNA_PROCESSING		19	0.67575026	1.4873109	0.042944785	0.30699593	0.999	9082	tags=58%, list=17%, signal=70%
GO_ENDORIBONUCLEASE_ACTIVITY	GO_ENDORIBONUCLEASE_ACTIVITY		47	0.50071174	1.486931	0.028282829	0.30585378	0.999	13950	tags=57%, list=26%, signal=77%
GO_METAPHASE_PLATE_CONGRESSION	GO_METAPHASE_PLATE_CONGRESSION		41	0.55338174	1.4866852	0.07569721	0.3043601	0.999	10442	tags=41%, list=19%, signal=51%
GO_RNA_PHOSPHODIESTER_BOND_HYDROLYSIS_ENDONUCLEOLYTIC	GO_RNA_PHOSPHODIESTER_BOND_HYDROLYSIS_ENDONUCLEOLYTIC		56	0.5152583	1.4864722	0.04183267	0.30275288	0.999	12706	tags=55%, list=23%, signal=72%
GO_CYTOSOLIC_LARGE_RIBOSOMAL_SUBUNIT	GO_CYTOSOLIC_LARGE_RIBOSOMAL_SUBUNIT		60	0.6917687	1.4838203	0.07184466	0.3077783	0.999	10103	tags=70%, list=19%, signal=86%
GO_TRANSLATION_FACTOR_ACTIVITY_RNA_BINDING	GO_TRANSLATION_FACTOR_ACTIVITY_RNA_BINDING		87	0.51881135	1.4810376	0.032388665	0.3135074	0.999	11710	tags=55%, list=22%, signal=70%
GO_PTERIDINE_CONTAINING_COMPOUND_BIOSYNTHETIC_PROCESS	GO_PTERIDINE_CONTAINING_COMPOUND_BIOSYNTHETIC_PROCESS		18	0.61980325	1.4798392	0.05942623	0.31448296	0.999	16287	tags=72%, list=30%, signal=103%
GO_METALLO_SULFUR_CLUSTER_ASSEMBLY	GO_METALLO_SULFUR_CLUSTER_ASSEMBLY		18	0.60676146	1.4781923	0.058091287	0.31686887	0.999	11134	tags=44%, list=21%, signal=56%
GO_COA_HYDROLASE_ACTIVITY	GO_COA_HYDROLASE_ACTIVITY		20	0.5709294	1.4768168	0.033333335	0.31834826	0.999	11488	tags=55%, list=21%, signal=70%
GO_MITOCHONDRIAL_MATRIX	GO_MITOCHONDRIAL_MATRIX		401	0.47431466	1.475967	0.05882353	0.3185825	0.999	14070	tags=51%, list=26%, signal=69%
GO_PYRIMIDINE_NUCLEOSIDE_BIOSYNTHETIC_PROCESS	GO_PYRIMIDINE_NUCLEOSIDE_BIOSYNTHETIC_PROCESS		29	0.5214684	1.4758106	0.03469388	0.316875	0.999	11767	tags=59%, list=22%, signal=75%
GO_EUCHROMATIN	GO_EUCHROMATIN		30	0.5106419	1.4741827	0.046904314	0.31937715	0.999	14612	tags=57%, list=27%, signal=78%
GO_THIOLESTER_HYDROLASE_ACTIVITY	GO_THIOLESTER_HYDROLASE_ACTIVITY		32	0.50662476	1.4726737	0.036697246	0.32145128	0.999	9894	tags=44%, list=18%, signal=53%
GO_SPLICEOSOMAL_COMPLEX	GO_SPLICEOSOMAL_COMPLEX		165	0.5640079	1.470753	0.08747515	0.32489115	1.0	16554	tags=67%, list=31%, signal=96%
GO_REPLICATION_FORK	GO_REPLICATION_FORK		62	0.5881496	1.4687802	0.06827309	0.328721	1.0	14205	tags=63%, list=26%, signal=85%
GO_INTRINSIC_COMPONENT_OF_MITOCHONDRIAL_INNER_MEMBRANE	GO_INTRINSIC_COMPONENT_OF_MITOCHONDRIAL_INNER_MEMBRANE		18	0.6069461	1.4677533	0.046	0.32977858	1.0	17321	tags=78%, list=32%, signal=114%
GO_RNA_POLYMERASE_II_TRANSCRIPTION_FACTOR_COMPLEX	GO_RNA_POLYMERASE_II_TRANSCRIPTION_FACTOR_COMPLEX		100	0.4508364	1.4667326	0.01764706	0.33075148	1.0	14769	tags=53%, list=27%, signal=73%
GO_NF_KAPPAB_BINDING	GO_NF_KAPPAB_BINDING		30	0.49375066	1.4661906	0.029880479	0.3300911	1.0	13588	tags=63%, list=25%, signal=84%
GO_HISTONE_KINASE_ACTIVITY	GO_HISTONE_KINASE_ACTIVITY		19	0.63513696	1.4660449	0.048523206	0.32841882	1.0	12917	tags=68%, list=24%, signal=90%
GO_B_CELL_ACTIVATION_INVOLVED_IN_IMMUNE_RESPONSE	GO_B_CELL_ACTIVATION_INVOLVED_IN_IMMUNE_RESPONSE		35	0.49461317	1.4646612	0.025490196	0.33043572	1.0	12110	tags=40%, list=22%, signal=51%
GO_DNA_REPLICATION_FACTOR_A_COMPLEX	GO_DNA_REPLICATION_FACTOR_A_COMPLEX		15	0.6404454	1.4613676	0.06818182	0.33794907	1.0	16709	tags=73%, list=31%, signal=106%
GO_PYRIMIDINE_NUCLEOTIDE_BIOSYNTHETIC_PROCESS	GO_PYRIMIDINE_NUCLEOTIDE_BIOSYNTHETIC_PROCESS		28	0.51743364	1.460616	0.037037037	0.338026	1.0	11767	tags=57%, list=22%, signal=73%
GO_ERROR_PRONE_TRANSLESION_SYNTHESIS	GO_ERROR_PRONE_TRANSLESION_SYNTHESIS		19	0.60216063	1.460394	0.045816734	0.33652434	1.0	17296	tags=63%, list=32%, signal=93%
GO_ORGANELLE_INNER_MEMBRANE	GO_ORGANELLE_INNER_MEMBRANE		500	0.45713848	1.4590997	0.052738335	0.33842742	1.0	12936	tags=47%, list=24%, signal=61%
GO_NUCLEOBASE_CONTAINING_COMPOUND_KINASE_ACTIVITY	GO_NUCLEOBASE_CONTAINING_COMPOUND_KINASE_ACTIVITY		45	0.46144176	1.4581561	0.023762377	0.3390387	1.0	7969	tags=36%, list=15%, signal=42%
GO_MYELIN_ASSEMBLY	GO_MYELIN_ASSEMBLY		15	0.5995205	1.4559911	0.060546875	0.34326258	1.0	14887	tags=87%, list=27%, signal=119%
GO_MITOTIC_G2_M_TRANSITION_CHECKPOINT	GO_MITOTIC_G2_M_TRANSITION_CHECKPOINT		18	0.5899216	1.4551853	0.054	0.34348744	1.0	9433	tags=50%, list=17%, signal=60%
GO_U2_TYPE_PRESPLICEOSOME	GO_U2_TYPE_PRESPLICEOSOME		15	0.7006297	1.4530834	0.069815196	0.34772032	1.0	13623	tags=80%, list=25%, signal=107%
GO_NUCLEOTIDE_EXCISION_REPAIR_DNA_INCISION	GO_NUCLEOTIDE_EXCISION_REPAIR_DNA_INCISION		39	0.54758716	1.4527186	0.07272727	0.3466915	1.0	13093	tags=56%, list=24%, signal=74%
GO_PYRIMIDINE_CONTAINING_COMPOUND_BIOSYNTHETIC_PROCESS	GO_PYRIMIDINE_CONTAINING_COMPOUND_BIOSYNTHETIC_PROCESS		39	0.4968735	1.45233	0.0407767	0.3457572	1.0	11767	tags=59%, list=22%, signal=75%
GO_REGULATION_OF_TELOMERASE_RNA_LOCALIZATION_TO_CAJAL_BODY	GO_REGULATION_OF_TELOMERASE_RNA_LOCALIZATION_TO_CAJAL_BODY		15	0.7182055	1.4520499	0.087318085	0.3445607	1.0	5250	tags=60%, list=10%, signal=66%
GO_DNA_RECOMBINATION	GO_DNA_RECOMBINATION		200	0.503411	1.4519509	0.04347826	0.34279478	1.0	14153	tags=52%, list=26%, signal=71%
GO_ENDONUCLEASE_ACTIVITY_ACTIVE_WITH_EITHER_RIBO_OR_DEOXYRIBONUCLEIC_ACIDS_AND_PRODUCING_3_PHOSPHOMONOESTERS	GO_ENDONUCLEASE_ACTIVITY_ACTIVE_WITH_EITHER_RIBO_OR_DEOXYRIBONUCLEIC_ACIDS_AND_PRODUCING_3_PHOSPHOMONOESTERS		19	0.57613915	1.4510808	0.05479452	0.343273	1.0	7687	tags=42%, list=14%, signal=49%
GO_CENTRIOLAR_SATELLITE	GO_CENTRIOLAR_SATELLITE		25	0.55981445	1.4494592	0.065476194	0.3461529	1.0	7516	tags=44%, list=14%, signal=51%
GO_90S_PRERIBOSOME	GO_90S_PRERIBOSOME		24	0.6717557	1.4491279	0.07660455	0.34510303	1.0	7034	tags=58%, list=13%, signal=67%
GO_HELICASE_ACTIVITY	GO_HELICASE_ACTIVITY		151	0.5472259	1.4486479	0.08627451	0.34441307	1.0	11861	tags=50%, list=22%, signal=64%
GO_SNRNA_METABOLIC_PROCESS	GO_SNRNA_METABOLIC_PROCESS		77	0.520482	1.4481684	0.078895465	0.34390476	1.0	15574	tags=62%, list=29%, signal=87%
GO_NUCLEOTIDE_EXCISION_REPAIR	GO_NUCLEOTIDE_EXCISION_REPAIR		111	0.49846488	1.4478327	0.08782435	0.34300616	1.0	15937	tags=58%, list=29%, signal=81%
GO_NUCLEAR_TRANSCRIPTION_FACTOR_COMPLEX	GO_NUCLEAR_TRANSCRIPTION_FACTOR_COMPLEX		126	0.43740135	1.4469916	0.021359224	0.3435738	1.0	14867	tags=53%, list=27%, signal=73%
GO_NEGATIVE_REGULATION_OF_TYPE_I_INTERFERON_PRODUCTION	GO_NEGATIVE_REGULATION_OF_TYPE_I_INTERFERON_PRODUCTION		39	0.51247835	1.4468427	0.060546875	0.3420733	1.0	14781	tags=46%, list=27%, signal=63%
GO_DNA_DEMETHYLATION	GO_DNA_DEMETHYLATION		15	0.61540455	1.4464164	0.055670105	0.34137636	1.0	10063	tags=40%, list=19%, signal=49%
GO_DNA_SECONDARY_STRUCTURE_BINDING	GO_DNA_SECONDARY_STRUCTURE_BINDING		24	0.6330394	1.4426087	0.07505071	0.35058445	1.0	13160	tags=67%, list=24%, signal=88%
GO_PROTEIN_LOCALIZATION_TO_CHROMOSOME	GO_PROTEIN_LOCALIZATION_TO_CHROMOSOME		43	0.5532955	1.4422773	0.07645875	0.3496078	1.0	15819	tags=56%, list=29%, signal=79%
GO_PROTEIN_LOCALIZATION_TO_CYTOSKELETON	GO_PROTEIN_LOCALIZATION_TO_CYTOSKELETON		30	0.5357643	1.4417533	0.059760958	0.34921056	1.0	8278	tags=40%, list=15%, signal=47%
GO_NUCLEIC_ACID_PHOSPHODIESTER_BOND_HYDROLYSIS	GO_NUCLEIC_ACID_PHOSPHODIESTER_BOND_HYDROLYSIS		238	0.45302644	1.4415367	0.040935673	0.3478574	1.0	14503	tags=52%, list=27%, signal=71%
GO_CYTOPLASMIC_EXOSOME_RNASE_COMPLEX_	GO_CYTOPLASMIC_EXOSOME_RNASE_COMPLEX_		15	0.6523492	1.4405066	0.07251909	0.34897164	1.0	9082	tags=60%, list=17%, signal=72%
GO_RIBONUCLEOPROTEIN_COMPLEX_BINDING	GO_RIBONUCLEOPROTEIN_COMPLEX_BINDING		94	0.45910725	1.4380301	0.065476194	0.35425004	1.0	11708	tags=49%, list=22%, signal=62%
GO_PROTEIN_EXPORT_FROM_NUCLEUS	GO_PROTEIN_EXPORT_FROM_NUCLEUS		29	0.52079445	1.4379734	0.05882353	0.35254925	1.0	11671	tags=48%, list=22%, signal=61%
GO_METAL_CLUSTER_BINDING	GO_METAL_CLUSTER_BINDING		63	0.4796102	1.436512	0.066	0.35511267	1.0	13862	tags=52%, list=26%, signal=70%
GO_TELOMERASE_HOLOENZYME_COMPLEX	GO_TELOMERASE_HOLOENZYME_COMPLEX		19	0.6614428	1.4362756	0.10420842	0.3539223	1.0	15686	tags=84%, list=29%, signal=118%
GO_TRANSLATION_INITIATION_FACTOR_ACTIVITY	GO_TRANSLATION_INITIATION_FACTOR_ACTIVITY		49	0.5556691	1.435502	0.075664625	0.35427627	1.0	13066	tags=67%, list=24%, signal=89%
GO_REGULATION_OF_PROTEIN_PHOSPHATASE_TYPE_2A_ACTIVITY	GO_REGULATION_OF_PROTEIN_PHOSPHATASE_TYPE_2A_ACTIVITY		24	0.5720544	1.4351338	0.08179959	0.35350123	1.0	16516	tags=54%, list=30%, signal=78%
GO_REGULATION_OF_CENTROSOME_CYCLE	GO_REGULATION_OF_CENTROSOME_CYCLE		39	0.50682425	1.4341539	0.062378168	0.35480544	1.0	11908	tags=51%, list=22%, signal=66%
GO_MLL1_2_COMPLEX	GO_MLL1_2_COMPLEX		26	0.5800604	1.4337378	0.09580839	0.35433975	1.0	16349	tags=69%, list=30%, signal=99%
GO_DEOXYRIBONUCLEOTIDE_METABOLIC_PROCESS	GO_DEOXYRIBONUCLEOTIDE_METABOLIC_PROCESS		33	0.5128553	1.4332184	0.04347826	0.35402754	1.0	8670	tags=45%, list=16%, signal=54%
GO_MITOCHONDRIAL_RNA_METABOLIC_PROCESS	GO_MITOCHONDRIAL_RNA_METABOLIC_PROCESS		27	0.6125518	1.4328606	0.124	0.35339016	1.0	11627	tags=59%, list=21%, signal=75%
GO_POLYOL_CATABOLIC_PROCESS	GO_POLYOL_CATABOLIC_PROCESS		18	0.5402881	1.4300958	0.070564516	0.35966238	1.0	16715	tags=56%, list=31%, signal=80%
GO_ENDORIBONUCLEASE_ACTIVITY_PRODUCING_5_PHOSPHOMONOESTERS	GO_ENDORIBONUCLEASE_ACTIVITY_PRODUCING_5_PHOSPHOMONOESTERS		26	0.5828934	1.4291816	0.079918034	0.36059022	1.0	12706	tags=65%, list=23%, signal=85%
GO_PYRIMIDINE_NUCLEOSIDE_TRIPHOSPHATE_BIOSYNTHETIC_PROCESS	GO_PYRIMIDINE_NUCLEOSIDE_TRIPHOSPHATE_BIOSYNTHETIC_PROCESS		17	0.56054306	1.4255692	0.046121594	0.36946812	1.0	6600	tags=53%, list=12%, signal=60%
GO_NEGATIVE_REGULATION_OF_VIRAL_RELEASE_FROM_HOST_CELL	GO_NEGATIVE_REGULATION_OF_VIRAL_RELEASE_FROM_HOST_CELL		16	0.5760468	1.4255439	0.064453125	0.36765644	1.0	5634	tags=31%, list=10%, signal=35%
GO_PROTEIN_TARGETING_TO_MEMBRANE	GO_PROTEIN_TARGETING_TO_MEMBRANE		156	0.48720667	1.4244226	0.08285164	0.36907846	1.0	9754	tags=44%, list=18%, signal=53%
GO_MULTI_ORGANISM_METABOLIC_PROCESS	GO_MULTI_ORGANISM_METABOLIC_PROCESS		137	0.5954691	1.4238368	0.10763209	0.3687719	1.0	14299	tags=69%, list=26%, signal=93%
GO_RNA_CAPPING	GO_RNA_CAPPING		35	0.5358019	1.4225779	0.108	0.37070686	1.0	10401	tags=43%, list=19%, signal=53%
GO_NUCLEOSIDE_DIPHOSPHATE_METABOLIC_PROCESS	GO_NUCLEOSIDE_DIPHOSPHATE_METABOLIC_PROCESS		79	0.4184887	1.4223543	0.028056113	0.36952317	1.0	8833	tags=35%, list=16%, signal=42%
GO_DNA_REPAIR	GO_DNA_REPAIR		459	0.46126243	1.421739	0.072407044	0.36948013	1.0	13351	tags=47%, list=25%, signal=62%
GO_MISMATCH_REPAIR	GO_MISMATCH_REPAIR		31	0.5698336	1.4200337	0.09072581	0.37274095	1.0	14106	tags=58%, list=26%, signal=78%
GO_REGULATION_OF_TRANSLATIONAL_FIDELITY	GO_REGULATION_OF_TRANSLATIONAL_FIDELITY		15	0.6357504	1.4188612	0.10136452	0.3741143	1.0	19776	tags=100%, list=36%, signal=157%
GO_G2_DNA_DAMAGE_CHECKPOINT	GO_G2_DNA_DAMAGE_CHECKPOINT		33	0.5134605	1.4175701	0.063917525	0.376054	1.0	16588	tags=67%, list=31%, signal=96%
GO_DNA_STRAND_ELONGATION	GO_DNA_STRAND_ELONGATION		30	0.5993593	1.4162627	0.09375	0.37796175	1.0	13083	tags=70%, list=24%, signal=92%
GO_TRANSCRIPTION_COUPLED_NUCLEOTIDE_EXCISION_REPAIR	GO_TRANSCRIPTION_COUPLED_NUCLEOTIDE_EXCISION_REPAIR		72	0.49604475	1.4157287	0.11001965	0.37765366	1.0	13116	tags=51%, list=24%, signal=68%
GO_MRNA_CLEAVAGE	GO_MRNA_CLEAVAGE		17	0.5935543	1.4154272	0.080078125	0.37676948	1.0	6676	tags=35%, list=12%, signal=40%
GO_DAMAGED_DNA_BINDING	GO_DAMAGED_DNA_BINDING		62	0.5119869	1.4147449	0.076612905	0.37697417	1.0	13093	tags=52%, list=24%, signal=68%
GO_TRANSFERASE_ACTIVITY_TRANSFERRING_ONE_CARBON_GROUPS	GO_TRANSFERASE_ACTIVITY_TRANSFERRING_ONE_CARBON_GROUPS		205	0.46916142	1.4137264	0.07554672	0.37833682	1.0	9945	tags=42%, list=18%, signal=51%
GO_ORGANIC_CYCLIC_COMPOUND_CATABOLIC_PROCESS	GO_ORGANIC_CYCLIC_COMPOUND_CATABOLIC_PROCESS		417	0.43166858	1.4136001	0.057142857	0.37692833	1.0	14509	tags=49%, list=27%, signal=67%
GO_CYTOCHROME_COMPLEX_ASSEMBLY	GO_CYTOCHROME_COMPLEX_ASSEMBLY		16	0.5886517	1.4133793	0.07984032	0.37585875	1.0	6845	tags=38%, list=13%, signal=43%
GO_MITOCHONDRIAL_TRANSMEMBRANE_TRANSPORT	GO_MITOCHONDRIAL_TRANSMEMBRANE_TRANSPORT		53	0.51398754	1.4119197	0.098425195	0.37832367	1.0	16438	tags=60%, list=30%, signal=87%
GO_PORE_COMPLEX_ASSEMBLY	GO_PORE_COMPLEX_ASSEMBLY		15	0.63002664	1.4116424	0.088	0.37743565	1.0	13134	tags=80%, list=24%, signal=106%
GO_RIBOSOME_BINDING	GO_RIBOSOME_BINDING		47	0.46123394	1.4112939	0.06762295	0.376823	1.0	11592	tags=53%, list=21%, signal=68%
GO_CATALYTIC_STEP_2_SPLICEOSOME	GO_CATALYTIC_STEP_2_SPLICEOSOME		87	0.5830473	1.4103224	0.11445783	0.3778673	1.0	12988	tags=57%, list=24%, signal=75%
GO_U1_SNRNP	GO_U1_SNRNP		16	0.6774677	1.4099077	0.10245901	0.37737343	1.0	12387	tags=69%, list=23%, signal=89%
GO_V_D_J_RECOMBINATION	GO_V_D_J_RECOMBINATION		16	0.6383376	1.4098489	0.07984032	0.3758174	1.0	15219	tags=81%, list=28%, signal=113%
GO_PYRIMIDINE_NUCLEOSIDE_METABOLIC_PROCESS	GO_PYRIMIDINE_NUCLEOSIDE_METABOLIC_PROCESS		47	0.45690444	1.4080793	0.036608864	0.37904796	1.0	11767	tags=49%, list=22%, signal=62%
GO_HISTONE_H4_K16_ACETYLATION	GO_HISTONE_H4_K16_ACETYLATION		15	0.5570064	1.4076097	0.06759443	0.37870723	1.0	11329	tags=40%, list=21%, signal=51%
GO_PROTEIN_IMPORT_INTO_NUCLEUS_TRANSLOCATION	GO_PROTEIN_IMPORT_INTO_NUCLEUS_TRANSLOCATION		29	0.49088132	1.4051269	0.021653544	0.38414428	1.0	10246	tags=45%, list=19%, signal=55%
GO_CYCLIN_BINDING	GO_CYCLIN_BINDING		19	0.51260304	1.4027315	0.057312254	0.38958782	1.0	13206	tags=53%, list=24%, signal=70%
GO_NUCLEOSIDE_PHOSPHATE_BIOSYNTHETIC_PROCESS	GO_NUCLEOSIDE_PHOSPHATE_BIOSYNTHETIC_PROCESS		179	0.40853193	1.4026194	0.023715414	0.38821346	1.0	12936	tags=48%, list=24%, signal=63%
GO_CYSTEINE_TYPE_ENDOPEPTIDASE_ACTIVITY_INVOLVED_IN_APOPTOTIC_PROCESS	GO_CYSTEINE_TYPE_ENDOPEPTIDASE_ACTIVITY_INVOLVED_IN_APOPTOTIC_PROCESS		15	0.62037826	1.4025263	0.061601643	0.3867406	1.0	7011	tags=40%, list=13%, signal=46%
GO_REGULATION_OF_TYPE_I_INTERFERON_PRODUCTION	GO_REGULATION_OF_TYPE_I_INTERFERON_PRODUCTION		110	0.4422689	1.4012069	0.044624746	0.3888645	1.0	14781	tags=45%, list=27%, signal=62%
GO_MITOCHONDRIAL_ELECTRON_TRANSPORT_CYTOCHROME_C_TO_OXYGEN	GO_MITOCHONDRIAL_ELECTRON_TRANSPORT_CYTOCHROME_C_TO_OXYGEN		16	0.6314535	1.4011047	0.12698413	0.38742825	1.0	5422	tags=38%, list=10%, signal=42%
GO_DNA_SYNTHESIS_INVOLVED_IN_DNA_REPAIR	GO_DNA_SYNTHESIS_INVOLVED_IN_DNA_REPAIR		72	0.504085	1.4003731	0.10404624	0.38789338	1.0	12148	tags=49%, list=22%, signal=63%
GO_PHOSPHOTRANSFERASE_ACTIVITY_PHOSPHATE_GROUP_AS_ACCEPTOR	GO_PHOSPHOTRANSFERASE_ACTIVITY_PHOSPHATE_GROUP_AS_ACCEPTOR		37	0.4732499	1.3989257	0.053497944	0.39045778	1.0	10978	tags=46%, list=20%, signal=58%
GO_TRANSLESION_SYNTHESIS	GO_TRANSLESION_SYNTHESIS		39	0.5012395	1.3967412	0.07489879	0.39535877	1.0	14202	tags=49%, list=26%, signal=66%
GO_MITOTIC_RECOMBINATION	GO_MITOTIC_RECOMBINATION		41	0.59336525	1.3964359	0.116504855	0.39454252	1.0	12148	tags=59%, list=22%, signal=75%
GO_RNA_POLYMERASE_II_CORE_BINDING	GO_RNA_POLYMERASE_II_CORE_BINDING		15	0.58855665	1.3960934	0.0951417	0.3938764	1.0	2403	tags=27%, list=4%, signal=28%
GO_REGULATION_OF_TELOMERE_MAINTENANCE	GO_REGULATION_OF_TELOMERE_MAINTENANCE		66	0.49038517	1.3947822	0.105675146	0.39608178	1.0	15169	tags=50%, list=28%, signal=69%
GO_NUCLEOCYTOPLASMIC_TRANSPORTER_ACTIVITY	GO_NUCLEOCYTOPLASMIC_TRANSPORTER_ACTIVITY		24	0.64279693	1.3942972	0.10453649	0.39581153	1.0	11444	tags=63%, list=21%, signal=79%
GO_TELOMERIC_DNA_BINDING	GO_TELOMERIC_DNA_BINDING		29	0.56637985	1.3938298	0.10331384	0.3955197	1.0	16488	tags=69%, list=30%, signal=99%
GO_REGULATION_OF_CENTROSOME_DUPLICATION	GO_REGULATION_OF_CENTROSOME_DUPLICATION		32	0.4963694	1.3937511	0.07509881	0.3941078	1.0	13111	tags=50%, list=24%, signal=66%
GO_EPITHELIAL_CELL_APOPTOTIC_PROCESS	GO_EPITHELIAL_CELL_APOPTOTIC_PROCESS		25	0.47294134	1.3931755	0.03168317	0.39410648	1.0	5189	tags=28%, list=10%, signal=31%
GO_ACETYLTRANSFERASE_ACTIVITY	GO_ACETYLTRANSFERASE_ACTIVITY		97	0.4589563	1.389049	0.08301158	0.40479746	1.0	11806	tags=39%, list=22%, signal=50%
GO_BASE_EXCISION_REPAIR	GO_BASE_EXCISION_REPAIR		39	0.5314129	1.3886572	0.11904762	0.40423635	1.0	14106	tags=64%, list=26%, signal=87%
GO_MRNA_CIS_SPLICING_VIA_SPLICEOSOME	GO_MRNA_CIS_SPLICING_VIA_SPLICEOSOME		18	0.63673276	1.3878732	0.1	0.40495574	1.0	17596	tags=78%, list=32%, signal=115%
GO_ENDORIBONUCLEASE_COMPLEX	GO_ENDORIBONUCLEASE_COMPLEX		17	0.5846586	1.387828	0.11683168	0.40339163	1.0	15215	tags=65%, list=28%, signal=90%
GO_DNA_DEPENDENT_ATPASE_ACTIVITY	GO_DNA_DEPENDENT_ATPASE_ACTIVITY		79	0.538835	1.3866174	0.128	0.40546858	1.0	15488	tags=59%, list=29%, signal=83%
GO_PURINE_NUCLEOBASE_METABOLIC_PROCESS	GO_PURINE_NUCLEOBASE_METABOLIC_PROCESS		20	0.53117263	1.3860458	0.08171206	0.40561253	1.0	5450	tags=35%, list=10%, signal=39%
GO_NCRNA_3_END_PROCESSING	GO_NCRNA_3_END_PROCESSING		20	0.60769737	1.3858026	0.10721649	0.40471524	1.0	9082	tags=55%, list=17%, signal=66%
GO_PYRIMIDINE_NUCLEOTIDE_METABOLIC_PROCESS	GO_PYRIMIDINE_NUCLEOTIDE_METABOLIC_PROCESS		43	0.45878714	1.3857942	0.0734127	0.40308106	1.0	11767	tags=51%, list=22%, signal=65%
GO_HISTONE_H2A_UBIQUITINATION	GO_HISTONE_H2A_UBIQUITINATION		16	0.5738011	1.3829209	0.11530815	0.40989083	1.0	13093	tags=63%, list=24%, signal=82%
GO_REGULATION_OF_TUMOR_NECROSIS_FACTOR_MEDIATED_SIGNALING_PATHWAY	GO_REGULATION_OF_TUMOR_NECROSIS_FACTOR_MEDIATED_SIGNALING_PATHWAY		49	0.4385523	1.3827217	0.05973025	0.40886426	1.0	11962	tags=39%, list=22%, signal=50%
GO_ENDONUCLEASE_ACTIVITY_ACTIVE_WITH_EITHER_RIBO_OR_DEOXYRIBONUCLEIC_ACIDS_AND_PRODUCING_5_PHOSPHOMONOESTERS	GO_ENDONUCLEASE_ACTIVITY_ACTIVE_WITH_EITHER_RIBO_OR_DEOXYRIBONUCLEIC_ACIDS_AND_PRODUCING_5_PHOSPHOMONOESTERS		34	0.5449389	1.3824947	0.0952381	0.407982	1.0	12706	tags=56%, list=23%, signal=73%
GO_PEPTIDYL_ARGININE_MODIFICATION	GO_PEPTIDYL_ARGININE_MODIFICATION		18	0.5474594	1.3823683	0.06876228	0.4067301	1.0	7088	tags=50%, list=13%, signal=57%
GO_PROTEIN_MONOUBIQUITINATION	GO_PROTEIN_MONOUBIQUITINATION		51	0.46226892	1.381901	0.077071294	0.40640673	1.0	14153	tags=55%, list=26%, signal=74%
GO_NEGATIVE_REGULATION_OF_DNA_BIOSYNTHETIC_PROCESS	GO_NEGATIVE_REGULATION_OF_DNA_BIOSYNTHETIC_PROCESS		32	0.47929898	1.3801336	0.061143983	0.4098212	1.0	13820	tags=50%, list=25%, signal=67%
GO_CHROMOSOME_LOCALIZATION	GO_CHROMOSOME_LOCALIZATION		60	0.48320764	1.378742	0.1167002	0.41222882	1.0	10442	tags=38%, list=19%, signal=47%
GO_GAMMA_TUBULIN_COMPLEX	GO_GAMMA_TUBULIN_COMPLEX		19	0.55335635	1.3786769	0.11491936	0.41079482	1.0	6682	tags=42%, list=12%, signal=48%
GO_COFACTOR_BIOSYNTHETIC_PROCESS	GO_COFACTOR_BIOSYNTHETIC_PROCESS		160	0.43266883	1.378629	0.07170542	0.4093091	1.0	12775	tags=42%, list=24%, signal=55%
GO_SEX_CHROMOSOME	GO_SEX_CHROMOSOME		27	0.5444653	1.3762162	0.10852713	0.41502178	1.0	13680	tags=56%, list=25%, signal=74%
GO_ORGANELLE_ENVELOPE_LUMEN	GO_ORGANELLE_ENVELOPE_LUMEN		78	0.44077176	1.3761401	0.07014028	0.4136612	1.0	14141	tags=50%, list=26%, signal=68%
GO_PROTEIN_LOCALIZATION_TO_CENTROSOME	GO_PROTEIN_LOCALIZATION_TO_CENTROSOME		17	0.60496455	1.3743482	0.125	0.4177682	1.0	8278	tags=47%, list=15%, signal=56%
GO_DNA_DIRECTED_RNA_POLYMERASE_II_HOLOENZYME	GO_DNA_DIRECTED_RNA_POLYMERASE_II_HOLOENZYME		94	0.4539861	1.3740431	0.11089109	0.41713887	1.0	12511	tags=48%, list=23%, signal=62%
GO_REGULATION_OF_B_CELL_APOPTOTIC_PROCESS	GO_REGULATION_OF_B_CELL_APOPTOTIC_PROCESS		18	0.51698697	1.3729718	0.09146342	0.41887838	1.0	16250	tags=67%, list=30%, signal=95%
GO_REGULATION_OF_EXIT_FROM_MITOSIS	GO_REGULATION_OF_EXIT_FROM_MITOSIS		15	0.559051	1.3729346	0.08906882	0.41740316	1.0	10442	tags=60%, list=19%, signal=74%
GO_DNA_POLYMERASE_ACTIVITY	GO_DNA_POLYMERASE_ACTIVITY		33	0.51359755	1.3721986	0.0990099	0.41794723	1.0	15726	tags=67%, list=29%, signal=94%
GO_NUCLEOBASE_BIOSYNTHETIC_PROCESS	GO_NUCLEOBASE_BIOSYNTHETIC_PROCESS		18	0.57532525	1.3680358	0.114173226	0.42915016	1.0	5450	tags=44%, list=10%, signal=49%
GO_NUCLEOTIDE_EXCISION_REPAIR_PREINCISION_COMPLEX_ASSEMBLY	GO_NUCLEOTIDE_EXCISION_REPAIR_PREINCISION_COMPLEX_ASSEMBLY		29	0.5166103	1.3679764	0.115234375	0.42768	1.0	8574	tags=38%, list=16%, signal=45%
GO_PYRIMIDINE_RIBONUCLEOSIDE_METABOLIC_PROCESS	GO_PYRIMIDINE_RIBONUCLEOSIDE_METABOLIC_PROCESS		30	0.4695789	1.3660307	0.05631068	0.432194	1.0	7649	tags=37%, list=14%, signal=43%
GO_POSITIVE_REGULATION_OF_TELOMERE_MAINTENANCE	GO_POSITIVE_REGULATION_OF_TELOMERE_MAINTENANCE		46	0.48188174	1.3652822	0.10980392	0.4328136	1.0	9433	tags=35%, list=17%, signal=42%
GO_RNA_SPLICING_VIA_TRANSESTERIFICATION_REACTIONS	GO_RNA_SPLICING_VIA_TRANSESTERIFICATION_REACTIONS		261	0.5127335	1.3635652	0.13833992	0.43636218	1.0	16645	tags=60%, list=31%, signal=86%
GO_SNRNA_PROCESSING	GO_SNRNA_PROCESSING		21	0.59702384	1.363156	0.12770137	0.43594083	1.0	10956	tags=62%, list=20%, signal=78%
GO_NEGATIVE_REGULATION_OF_MRNA_METABOLIC_PROCESS	GO_NEGATIVE_REGULATION_OF_MRNA_METABOLIC_PROCESS		34	0.5653436	1.3606505	0.15039062	0.442091	1.0	14928	tags=62%, list=28%, signal=85%
GO_CELLULAR_METABOLIC_COMPOUND_SALVAGE	GO_CELLULAR_METABOLIC_COMPOUND_SALVAGE		38	0.4556496	1.3598039	0.0815534	0.44312835	1.0	12110	tags=42%, list=22%, signal=54%
GO_DNA_STRAND_ELONGATION_INVOLVED_IN_DNA_REPLICATION	GO_DNA_STRAND_ELONGATION_INVOLVED_IN_DNA_REPLICATION		25	0.5886778	1.3593355	0.14872798	0.44294718	1.0	13083	tags=68%, list=24%, signal=90%
GO_RIBOSOMAL_LARGE_SUBUNIT_ASSEMBLY	GO_RIBOSOMAL_LARGE_SUBUNIT_ASSEMBLY		23	0.6180055	1.3588772	0.14430894	0.44270623	1.0	9497	tags=65%, list=17%, signal=79%
GO_NUCLEAR_REPLICATION_FORK	GO_NUCLEAR_REPLICATION_FORK		39	0.5540767	1.3576136	0.13226452	0.4450128	1.0	17463	tags=74%, list=32%, signal=110%
GO_PURINE_CONTAINING_COMPOUND_BIOSYNTHETIC_PROCESS	GO_PURINE_CONTAINING_COMPOUND_BIOSYNTHETIC_PROCESS		134	0.39413413	1.3575755	0.04637097	0.4434931	1.0	12936	tags=47%, list=24%, signal=62%
GO_ENERGY_COUPLED_PROTON_TRANSPORT_DOWN_ELECTROCHEMICAL_GRADIENT	GO_ENERGY_COUPLED_PROTON_TRANSPORT_DOWN_ELECTROCHEMICAL_GRADIENT		23	0.5560639	1.3574603	0.13627255	0.44222137	1.0	12936	tags=61%, list=24%, signal=80%
GO_NUCLEOID	GO_NUCLEOID		42	0.55413073	1.3551056	0.16798419	0.44787744	1.0	13238	tags=62%, list=24%, signal=82%
GO_S_ADENOSYLMETHIONINE_DEPENDENT_METHYLTRANSFERASE_ACTIVITY	GO_S_ADENOSYLMETHIONINE_DEPENDENT_METHYLTRANSFERASE_ACTIVITY		129	0.44454554	1.3549784	0.106177606	0.4466236	1.0	10204	tags=42%, list=19%, signal=51%
GO_ESTABLISHMENT_OF_PROTEIN_LOCALIZATION_TO_ORGANELLE	GO_ESTABLISHMENT_OF_PROTEIN_LOCALIZATION_TO_ORGANELLE		356	0.40531507	1.3545647	0.08531746	0.44626153	1.0	10330	tags=38%, list=19%, signal=47%
GO_NUCLEOBASE_METABOLIC_PROCESS	GO_NUCLEOBASE_METABOLIC_PROCESS		38	0.4426073	1.3537614	0.070881225	0.447233	1.0	6311	tags=34%, list=12%, signal=39%
GO_TRANSFERASE_COMPLEX_TRANSFERRING_PHOSPHORUS_CONTAINING_GROUPS	GO_TRANSFERASE_COMPLEX_TRANSFERRING_PHOSPHORUS_CONTAINING_GROUPS		234	0.40752485	1.3527249	0.0729783	0.4490123	1.0	12647	tags=45%, list=23%, signal=59%
GO_RNA_POLYMERASE_II_CARBOXY_TERMINAL_DOMAIN_KINASE_ACTIVITY	GO_RNA_POLYMERASE_II_CARBOXY_TERMINAL_DOMAIN_KINASE_ACTIVITY		16	0.5778838	1.3525002	0.14785992	0.44809088	1.0	8019	tags=50%, list=15%, signal=59%
GO_NEGATIVE_REGULATION_OF_CYSTEINE_TYPE_ENDOPEPTIDASE_ACTIVITY	GO_NEGATIVE_REGULATION_OF_CYSTEINE_TYPE_ENDOPEPTIDASE_ACTIVITY		87	0.37896463	1.3503233	0.016161617	0.4536025	1.0	14153	tags=43%, list=26%, signal=57%
GO_REPLISOME	GO_REPLISOME		29	0.5700139	1.3495669	0.1574642	0.4542506	1.0	17463	tags=79%, list=32%, signal=117%
GO_INNER_MITOCHONDRIAL_MEMBRANE_ORGANIZATION	GO_INNER_MITOCHONDRIAL_MEMBRANE_ORGANIZATION		17	0.55013496	1.3482505	0.13384321	0.4567767	1.0	10812	tags=47%, list=20%, signal=59%
GO_DNA_HELICASE_ACTIVITY	GO_DNA_HELICASE_ACTIVITY		53	0.5466362	1.347523	0.15841584	0.457604	1.0	13083	tags=45%, list=24%, signal=60%
GO_UBIQUITIN_DEPENDENT_PROTEIN_CATABOLIC_PROCESS_VIA_THE_MULTIVESICULAR_BODY_SORTING_PATHWAY	GO_UBIQUITIN_DEPENDENT_PROTEIN_CATABOLIC_PROCESS_VIA_THE_MULTIVESICULAR_BODY_SORTING_PATHWAY		16	0.5191303	1.3474739	0.09922179	0.45616052	1.0	6006	tags=31%, list=11%, signal=35%
GO_DNA_DEALKYLATION	GO_DNA_DEALKYLATION		20	0.5322343	1.3465418	0.09202454	0.45744807	1.0	10063	tags=40%, list=19%, signal=49%
GO_HISTONE_UBIQUITINATION	GO_HISTONE_UBIQUITINATION		34	0.49768776	1.3449144	0.12648222	0.46108484	1.0	15937	tags=62%, list=29%, signal=87%
GO_SINGLE_STRANDED_DNA_BINDING	GO_SINGLE_STRANDED_DNA_BINDING		86	0.4971187	1.3423469	0.13916501	0.46715763	1.0	12524	tags=50%, list=23%, signal=65%
GO_CHROMOSOME_TELOMERIC_REGION	GO_CHROMOSOME_TELOMERIC_REGION		159	0.45157686	1.3410776	0.1257485	0.46975523	1.0	12612	tags=43%, list=23%, signal=56%
GO_INNER_MITOCHONDRIAL_MEMBRANE_PROTEIN_COMPLEX	GO_INNER_MITOCHONDRIAL_MEMBRANE_PROTEIN_COMPLEX		102	0.49045575	1.339562	0.16463415	0.47315526	1.0	12444	tags=49%, list=23%, signal=63%
GO_NEGATIVE_REGULATION_OF_TELOMERE_MAINTENANCE_VIA_TELOMERE_LENGTHENING	GO_NEGATIVE_REGULATION_OF_TELOMERE_MAINTENANCE_VIA_TELOMERE_LENGTHENING		17	0.5865701	1.3394212	0.17034069	0.47196928	1.0	8651	tags=41%, list=16%, signal=49%
GO_NUCLEAR_OUTER_MEMBRANE	GO_NUCLEAR_OUTER_MEMBRANE		20	0.4949654	1.3389808	0.099609375	0.4717859	1.0	9337	tags=35%, list=17%, signal=42%
GO_PROTEIN_TARGETING	GO_PROTEIN_TARGETING		401	0.3815835	1.3382492	0.08039216	0.47266102	1.0	10330	tags=37%, list=19%, signal=45%
GO_NUCLEAR_PERIPHERY	GO_NUCLEAR_PERIPHERY		119	0.4426565	1.3380697	0.11394892	0.4716034	1.0	13160	tags=45%, list=24%, signal=59%
GO_SNRNA_BINDING	GO_SNRNA_BINDING		34	0.54333436	1.3366338	0.16502947	0.4745152	1.0	15236	tags=62%, list=28%, signal=86%
GO_NUCLEOSIDE_TRIPHOSPHATE_METABOLIC_PROCESS	GO_NUCLEOSIDE_TRIPHOSPHATE_METABOLIC_PROCESS		215	0.40128475	1.3358275	0.08471075	0.47554424	1.0	13265	tags=43%, list=24%, signal=57%
GO_TRANSCRIPTION_FACTOR_TFIID_COMPLEX	GO_TRANSCRIPTION_FACTOR_TFIID_COMPLEX		22	0.5171608	1.335703	0.13043478	0.47434133	1.0	12458	tags=59%, list=23%, signal=77%
GO_PYRIMIDINE_CONTAINING_COMPOUND_METABOLIC_PROCESS	GO_PYRIMIDINE_CONTAINING_COMPOUND_METABOLIC_PROCESS		73	0.4123563	1.3356054	0.046875	0.47303262	1.0	7649	tags=37%, list=14%, signal=43%
GO_NUCLEOTIDE_EXCISION_REPAIR_PREINCISION_COMPLEX_STABILIZATION	GO_NUCLEOTIDE_EXCISION_REPAIR_PREINCISION_COMPLEX_STABILIZATION		21	0.55711716	1.3348467	0.14990138	0.4739534	1.0	14106	tags=57%, list=26%, signal=77%
GO_POSITIVE_REGULATION_OF_DNA_TEMPLATED_TRANSCRIPTION_ELONGATION	GO_POSITIVE_REGULATION_OF_DNA_TEMPLATED_TRANSCRIPTION_ELONGATION		22	0.5397615	1.3332826	0.14859438	0.47721773	1.0	5111	tags=32%, list=9%, signal=35%
GO_COENZYME_BIOSYNTHETIC_PROCESS	GO_COENZYME_BIOSYNTHETIC_PROCESS		121	0.4327991	1.3310763	0.11047619	0.482573	1.0	12775	tags=44%, list=24%, signal=57%
GO_PRESPLICEOSOME	GO_PRESPLICEOSOME		20	0.59043956	1.3302891	0.1643002	0.483612	1.0	13623	tags=65%, list=25%, signal=87%
GO_NUCLEAR_EUCHROMATIN	GO_NUCLEAR_EUCHROMATIN		23	0.48573828	1.3292376	0.11257035	0.485395	1.0	14554	tags=52%, list=27%, signal=71%
GO_DNA_DIRECTED_DNA_POLYMERASE_ACTIVITY	GO_DNA_DIRECTED_DNA_POLYMERASE_ACTIVITY		26	0.51513773	1.3289609	0.11088296	0.4846275	1.0	12923	tags=54%, list=24%, signal=71%
GO_RETROGRADE_TRANSPORT_ENDOSOME_TO_GOLGI	GO_RETROGRADE_TRANSPORT_ENDOSOME_TO_GOLGI		71	0.41250268	1.3257409	0.10633947	0.49372897	1.0	12812	tags=41%, list=24%, signal=53%
GO_MITOCHONDRIAL_MEMBRANE_PART	GO_MITOCHONDRIAL_MEMBRANE_PART		162	0.44075385	1.3243395	0.13250518	0.4967716	1.0	13369	tags=47%, list=25%, signal=62%
GO_FOUR_WAY_JUNCTION_DNA_BINDING	GO_FOUR_WAY_JUNCTION_DNA_BINDING		15	0.6394241	1.3238958	0.15643564	0.49667647	1.0	13160	tags=67%, list=24%, signal=88%
GO_POSITIVE_REGULATION_OF_DNA_BIOSYNTHETIC_PROCESS	GO_POSITIVE_REGULATION_OF_DNA_BIOSYNTHETIC_PROCESS		58	0.449759	1.3235252	0.11287129	0.49634257	1.0	14910	tags=48%, list=27%, signal=66%
GO_TELOMERE_MAINTENANCE_VIA_RECOMBINATION	GO_TELOMERE_MAINTENANCE_VIA_RECOMBINATION		32	0.5693036	1.3211863	0.17159763	0.50223875	1.0	12148	tags=56%, list=22%, signal=72%
GO_RNA_SPLICING	GO_RNA_SPLICING		356	0.47699732	1.3209747	0.14314115	0.50129193	1.0	13996	tags=49%, list=26%, signal=65%
GO_NONMOTILE_PRIMARY_CILIUM_ASSEMBLY	GO_NONMOTILE_PRIMARY_CILIUM_ASSEMBLY		23	0.5792833	1.320763	0.15587045	0.5003687	1.0	9307	tags=57%, list=17%, signal=68%
GO_DNA_GEOMETRIC_CHANGE	GO_DNA_GEOMETRIC_CHANGE		81	0.49377975	1.3189744	0.17529881	0.5045102	1.0	13093	tags=42%, list=24%, signal=55%
GO_POSITIVE_REGULATION_OF_RNA_SPLICING	GO_POSITIVE_REGULATION_OF_RNA_SPLICING		24	0.5276658	1.3183554	0.1409002	0.5050333	1.0	5813	tags=33%, list=11%, signal=37%
GO_MANNOSYLTRANSFERASE_ACTIVITY	GO_MANNOSYLTRANSFERASE_ACTIVITY		25	0.46200207	1.3170953	0.11287129	0.50786656	1.0	10924	tags=44%, list=20%, signal=55%
GO_U2_TYPE_SPLICEOSOMAL_COMPLEX	GO_U2_TYPE_SPLICEOSOMAL_COMPLEX		29	0.55337375	1.3161399	0.17777778	0.5095012	1.0	16398	tags=69%, list=30%, signal=99%
GO_ACETYL_COA_METABOLIC_PROCESS	GO_ACETYL_COA_METABOLIC_PROCESS		24	0.52176	1.3138276	0.16116504	0.5155841	1.0	16862	tags=63%, list=31%, signal=91%
GO_MITOCHONDRIAL_PROTEIN_COMPLEX	GO_MITOCHONDRIAL_PROTEIN_COMPLEX		130	0.46543613	1.3126854	0.18126273	0.5178694	1.0	12444	tags=47%, list=23%, signal=61%
GO_REGULATION_OF_MRNA_SPLICING_VIA_SPLICEOSOME	GO_REGULATION_OF_MRNA_SPLICING_VIA_SPLICEOSOME		62	0.4979233	1.3124056	0.16831683	0.5171813	1.0	6655	tags=35%, list=12%, signal=40%
GO_PCG_PROTEIN_COMPLEX	GO_PCG_PROTEIN_COMPLEX		43	0.5174953	1.3120791	0.17374517	0.51663965	1.0	14231	tags=65%, list=26%, signal=88%
GO_GLYCERALDEHYDE_3_PHOSPHATE_METABOLIC_PROCESS	GO_GLYCERALDEHYDE_3_PHOSPHATE_METABOLIC_PROCESS		17	0.54695374	1.3112525	0.15899582	0.51789284	1.0	7516	tags=41%, list=14%, signal=48%
GO_SPLICEOSOMAL_SNRNP_ASSEMBLY	GO_SPLICEOSOMAL_SNRNP_ASSEMBLY		37	0.56915796	1.3110073	0.1996008	0.51708454	1.0	16185	tags=65%, list=30%, signal=92%
GO_SAGA_TYPE_COMPLEX	GO_SAGA_TYPE_COMPLEX		31	0.5248514	1.3102673	0.16438356	0.51794285	1.0	12458	tags=52%, list=23%, signal=67%
GO_ADENYLYLTRANSFERASE_ACTIVITY	GO_ADENYLYLTRANSFERASE_ACTIVITY		24	0.53118914	1.3097038	0.097165994	0.51824784	1.0	15416	tags=63%, list=28%, signal=87%
GO_NUCLEOTIDE_PHOSPHORYLATION	GO_NUCLEOTIDE_PHOSPHORYLATION		56	0.42061013	1.3093389	0.101265825	0.5179742	1.0	8833	tags=34%, list=16%, signal=40%
GO_DOUBLE_STRAND_BREAK_REPAIR	GO_DOUBLE_STRAND_BREAK_REPAIR		158	0.45359734	1.3079188	0.15079366	0.5212302	1.0	14275	tags=49%, list=26%, signal=66%
GO_GLUCOSE_6_PHOSPHATE_METABOLIC_PROCESS	GO_GLUCOSE_6_PHOSPHATE_METABOLIC_PROCESS		21	0.48918092	1.3074496	0.12269939	0.52119863	1.0	6546	tags=33%, list=12%, signal=38%
GO_NUCLEAR_CHROMOSOME_TELOMERIC_REGION	GO_NUCLEAR_CHROMOSOME_TELOMERIC_REGION		129	0.45204332	1.3072778	0.16498993	0.5201963	1.0	12612	tags=43%, list=23%, signal=56%
GO_PRE_MRNA_BINDING	GO_PRE_MRNA_BINDING		24	0.56918097	1.3066105	0.19960475	0.52067715	1.0	15236	tags=71%, list=28%, signal=98%
GO_NON_RECOMBINATIONAL_REPAIR	GO_NON_RECOMBINATIONAL_REPAIR		70	0.46410614	1.3065828	0.17102616	0.5191885	1.0	12389	tags=44%, list=23%, signal=57%
GO_SMALL_NUCLEAR_RIBONUCLEOPROTEIN_COMPLEX	GO_SMALL_NUCLEAR_RIBONUCLEOPROTEIN_COMPLEX		59	0.5132702	1.3064188	0.17068273	0.51811653	1.0	16398	tags=59%, list=30%, signal=85%
GO_RNA_STABILIZATION	GO_RNA_STABILIZATION		30	0.4879852	1.3050319	0.14942528	0.52097	1.0	8030	tags=37%, list=15%, signal=43%
GO_PRENYLTRANSFERASE_ACTIVITY	GO_PRENYLTRANSFERASE_ACTIVITY		15	0.5018718	1.304412	0.10483871	0.5214843	1.0	18758	tags=73%, list=35%, signal=112%
GO_NEGATIVE_REGULATION_OF_DEFENSE_RESPONSE_TO_VIRUS	GO_NEGATIVE_REGULATION_OF_DEFENSE_RESPONSE_TO_VIRUS		18	0.47622058	1.3038623	0.120162934	0.5217751	1.0	8788	tags=44%, list=16%, signal=53%
GO_REGULATION_OF_DNA_BIOSYNTHETIC_PROCESS	GO_REGULATION_OF_DNA_BIOSYNTHETIC_PROCESS		92	0.42807433	1.3038422	0.12175649	0.52025783	1.0	14910	tags=49%, list=27%, signal=67%
GO_TRANSCRIPTION_ELONGATION_FROM_RNA_POLYMERASE_II_PROMOTER	GO_TRANSCRIPTION_ELONGATION_FROM_RNA_POLYMERASE_II_PROMOTER		76	0.43008497	1.3037332	0.16135459	0.51907563	1.0	12929	tags=39%, list=24%, signal=52%
GO_METHYLTRANSFERASE_COMPLEX	GO_METHYLTRANSFERASE_COMPLEX		83	0.48660365	1.3036009	0.17330678	0.51792556	1.0	12637	tags=54%, list=23%, signal=71%
GO_U5_SNRNP	GO_U5_SNRNP		16	0.59015936	1.3035593	0.17234468	0.5165184	1.0	16185	tags=63%, list=30%, signal=89%
GO_EXONUCLEASE_ACTIVITY_ACTIVE_WITH_EITHER_RIBO_OR_DEOXYRIBONUCLEIC_ACIDS_AND_PRODUCING_5_PHOSPHOMONOESTERS	GO_EXONUCLEASE_ACTIVITY_ACTIVE_WITH_EITHER_RIBO_OR_DEOXYRIBONUCLEIC_ACIDS_AND_PRODUCING_5_PHOSPHOMONOESTERS		42	0.4946156	1.3029531	0.1736527	0.5169336	1.0	13919	tags=55%, list=26%, signal=74%
GO_UBIQUITIN_LIKE_PROTEIN_SPECIFIC_PROTEASE_ACTIVITY	GO_UBIQUITIN_LIKE_PROTEIN_SPECIFIC_PROTEASE_ACTIVITY		105	0.4000695	1.302768	0.09072978	0.5160001	1.0	15150	tags=50%, list=28%, signal=69%
GO_HYDROLASE_ACTIVITY_ACTING_ON_CARBON_NITROGEN_BUT_NOT_PEPTIDE_BONDS_IN_CYCLIC_AMIDINES	GO_HYDROLASE_ACTIVITY_ACTING_ON_CARBON_NITROGEN_BUT_NOT_PEPTIDE_BONDS_IN_CYCLIC_AMIDINES		34	0.45719555	1.3021537	0.10396975	0.5165239	1.0	7858	tags=32%, list=14%, signal=38%
GO_MACROLIDE_BINDING	GO_MACROLIDE_BINDING		18	0.47834265	1.3017905	0.13559322	0.5161781	1.0	13551	tags=44%, list=25%, signal=59%
GO_NUCLEAR_TRANSCRIBED_MRNA_CATABOLIC_PROCESS_EXONUCLEOLYTIC	GO_NUCLEAR_TRANSCRIBED_MRNA_CATABOLIC_PROCESS_EXONUCLEOLYTIC		30	0.5590447	1.301249	0.20512821	0.5164334	1.0	14871	tags=67%, list=27%, signal=92%
GO_MRNA_3_END_PROCESSING	GO_MRNA_3_END_PROCESSING		71	0.5196319	1.2997085	0.16297787	0.5200335	1.0	13483	tags=48%, list=25%, signal=64%
GO_PHOSPHATIDYLINOSITOL_PHOSPHATE_PHOSPHATASE_ACTIVITY	GO_PHOSPHATIDYLINOSITOL_PHOSPHATE_PHOSPHATASE_ACTIVITY		29	0.48880854	1.2985066	0.16496944	0.52233666	1.0	11209	tags=48%, list=21%, signal=61%
GO_QUINONE_METABOLIC_PROCESS	GO_QUINONE_METABOLIC_PROCESS		29	0.50552267	1.298203	0.1557377	0.52187246	1.0	12820	tags=48%, list=24%, signal=63%
GO_LIGASE_ACTIVITY	GO_LIGASE_ACTIVITY		386	0.3615915	1.297738	0.06769826	0.5219414	1.0	11859	tags=36%, list=22%, signal=45%
GO_METHYLATION	GO_METHYLATION		263	0.4200072	1.2970412	0.14174758	0.5228633	1.0	12637	tags=44%, list=23%, signal=58%
GO_HEAT_SHOCK_PROTEIN_BINDING	GO_HEAT_SHOCK_PROTEIN_BINDING		89	0.3886433	1.2967906	0.08237548	0.52218175	1.0	13994	tags=47%, list=26%, signal=63%
GO_NEGATIVE_REGULATION_OF_INTRINSIC_APOPTOTIC_SIGNALING_PATHWAY_BY_P53_CLASS_MEDIATOR	GO_NEGATIVE_REGULATION_OF_INTRINSIC_APOPTOTIC_SIGNALING_PATHWAY_BY_P53_CLASS_MEDIATOR		18	0.45633993	1.2956537	0.12045889	0.5243929	1.0	8280	tags=44%, list=15%, signal=52%
GO_TERMINATION_OF_RNA_POLYMERASE_II_TRANSCRIPTION	GO_TERMINATION_OF_RNA_POLYMERASE_II_TRANSCRIPTION		61	0.54940736	1.2949511	0.18902439	0.5252496	1.0	13483	tags=51%, list=25%, signal=68%
GO_DNA_REPLICATION_INDEPENDENT_NUCLEOSOME_ORGANIZATION	GO_DNA_REPLICATION_INDEPENDENT_NUCLEOSOME_ORGANIZATION		52	0.50719815	1.294664	0.20762712	0.52474403	1.0	16997	tags=60%, list=31%, signal=87%
GO_POSITIVE_REGULATION_OF_DNA_REPAIR	GO_POSITIVE_REGULATION_OF_DNA_REPAIR		37	0.4651513	1.293573	0.12795275	0.52688533	1.0	14231	tags=51%, list=26%, signal=70%
GO_HISTONE_METHYLTRANSFERASE_COMPLEX	GO_HISTONE_METHYLTRANSFERASE_COMPLEX		64	0.46350193	1.2926894	0.16167665	0.5283785	1.0	16349	tags=67%, list=30%, signal=96%
GO_FRUCTOSE_METABOLIC_PROCESS	GO_FRUCTOSE_METABOLIC_PROCESS		15	0.58788395	1.2924236	0.1749503	0.5277906	1.0	17346	tags=80%, list=32%, signal=118%
GO_DNA_REPLICATION	GO_DNA_REPLICATION		199	0.46863264	1.2923733	0.19642857	0.52647465	1.0	15907	tags=56%, list=29%, signal=79%
GO_PROTEIN_MODIFICATION_BY_SMALL_PROTEIN_REMOVAL	GO_PROTEIN_MODIFICATION_BY_SMALL_PROTEIN_REMOVAL		121	0.39922124	1.2922852	0.10526316	0.5253197	1.0	15150	tags=49%, list=28%, signal=67%
GO_TRANSLATION_INITIATION_FACTOR_BINDING	GO_TRANSLATION_INITIATION_FACTOR_BINDING		28	0.49104834	1.291908	0.15587045	0.5250606	1.0	10943	tags=57%, list=20%, signal=72%
GO_RNA_POLYADENYLATION	GO_RNA_POLYADENYLATION		29	0.5079331	1.2893834	0.17821783	0.53193045	1.0	10956	tags=38%, list=20%, signal=48%
GO_RNA_3_END_PROCESSING	GO_RNA_3_END_PROCESSING		96	0.49818283	1.2862169	0.17408907	0.54108953	1.0	9082	tags=39%, list=17%, signal=46%
GO_REGULATION_OF_TRANSCRIPTION_INVOLVED_IN_G1_S_TRANSITION_OF_MITOTIC_CELL_CYCLE	GO_REGULATION_OF_TRANSCRIPTION_INVOLVED_IN_G1_S_TRANSITION_OF_MITOTIC_CELL_CYCLE		27	0.52289355	1.2861787	0.2165992	0.5397142	1.0	11767	tags=48%, list=22%, signal=61%
GO_PROTEIN_KINASE_COMPLEX	GO_PROTEIN_KINASE_COMPLEX		90	0.3762453	1.2859268	0.09055877	0.5390907	1.0	11814	tags=42%, list=22%, signal=54%
GO_MRNA_PROCESSING	GO_MRNA_PROCESSING		419	0.4481338	1.2856854	0.16435644	0.5384055	1.0	16554	tags=54%, list=31%, signal=77%
GO_EXODEOXYRIBONUCLEASE_ACTIVITY	GO_EXODEOXYRIBONUCLEASE_ACTIVITY		15	0.5399891	1.2846642	0.1741683	0.5403157	1.0	12635	tags=60%, list=23%, signal=78%
GO_CENTROMERE_COMPLEX_ASSEMBLY	GO_CENTROMERE_COMPLEX_ASSEMBLY		47	0.5278255	1.2845441	0.19914347	0.5392443	1.0	14591	tags=57%, list=27%, signal=79%
GO_MRNA_SPLICE_SITE_SELECTION	GO_MRNA_SPLICE_SITE_SELECTION		25	0.59380573	1.2844139	0.2035928	0.5381965	1.0	14245	tags=60%, list=26%, signal=81%
GO_POSTREPLICATION_REPAIR	GO_POSTREPLICATION_REPAIR		52	0.44105908	1.2838447	0.15789473	0.5386441	1.0	14202	tags=44%, list=26%, signal=60%
GO_MICROTUBULE_ORGANIZING_CENTER_PART	GO_MICROTUBULE_ORGANIZING_CENTER_PART		142	0.4212069	1.2833985	0.15821502	0.53866917	1.0	8278	tags=35%, list=15%, signal=41%
GO_POSITIVE_REGULATION_OF_TYPE_I_INTERFERON_PRODUCTION	GO_POSITIVE_REGULATION_OF_TYPE_I_INTERFERON_PRODUCTION		70	0.43532926	1.2830162	0.10920771	0.53842765	1.0	14046	tags=49%, list=26%, signal=65%
GO_METHIONINE_METABOLIC_PROCESS	GO_METHIONINE_METABOLIC_PROCESS		18	0.5025254	1.2825934	0.15261044	0.5382518	1.0	7871	tags=33%, list=15%, signal=39%
GO_CELLULAR_MODIFIED_AMINO_ACID_BIOSYNTHETIC_PROCESS	GO_CELLULAR_MODIFIED_AMINO_ACID_BIOSYNTHETIC_PROCESS		53	0.41921127	1.2825557	0.09380863	0.5369447	1.0	8045	tags=30%, list=15%, signal=35%
GO_GPI_ANCHOR_METABOLIC_PROCESS	GO_GPI_ANCHOR_METABOLIC_PROCESS		32	0.46865913	1.2824537	0.16205534	0.53581864	1.0	10517	tags=47%, list=19%, signal=58%
GO_AEROBIC_RESPIRATION	GO_AEROBIC_RESPIRATION		50	0.4487737	1.2821507	0.14257029	0.53535306	1.0	14822	tags=54%, list=27%, signal=74%
GO_NCRNA_CATABOLIC_PROCESS	GO_NCRNA_CATABOLIC_PROCESS		22	0.51288766	1.2820865	0.14990138	0.53414977	1.0	16669	tags=73%, list=31%, signal=105%
GO_CELL_SEPARATION_AFTER_CYTOKINESIS	GO_CELL_SEPARATION_AFTER_CYTOKINESIS		17	0.5184915	1.281336	0.15841584	0.53513545	1.0	9845	tags=35%, list=18%, signal=43%
GO_NUCLEOSIDE_MONOPHOSPHATE_METABOLIC_PROCESS	GO_NUCLEOSIDE_MONOPHOSPHATE_METABOLIC_PROCESS		230	0.37952846	1.2812394	0.12778905	0.5340251	1.0	14027	tags=43%, list=26%, signal=58%
GO_PROTEIN_KINASE_A_CATALYTIC_SUBUNIT_BINDING	GO_PROTEIN_KINASE_A_CATALYTIC_SUBUNIT_BINDING		15	0.4941585	1.2803465	0.14893617	0.5355616	1.0	16443	tags=67%, list=30%, signal=96%
GO_NUCLEAR_MEMBRANE	GO_NUCLEAR_MEMBRANE		271	0.3639266	1.2784324	0.09108527	0.5403617	1.0	11600	tags=36%, list=21%, signal=46%
GO_COP9_SIGNALOSOME	GO_COP9_SIGNALOSOME		33	0.43361577	1.2784309	0.13061224	0.53894687	1.0	16335	tags=67%, list=30%, signal=95%
GO_NUCLEAR_CYCLIN_DEPENDENT_PROTEIN_KINASE_HOLOENZYME_COMPLEX	GO_NUCLEAR_CYCLIN_DEPENDENT_PROTEIN_KINASE_HOLOENZYME_COMPLEX		15	0.5543669	1.2783414	0.19507186	0.5378068	1.0	5627	tags=40%, list=10%, signal=45%
GO_PROTEIN_DEPOLYMERIZATION	GO_PROTEIN_DEPOLYMERIZATION		24	0.516444	1.2780066	0.17634855	0.537475	1.0	15418	tags=58%, list=28%, signal=81%
GO_U4_U6_X_U5_TRI_SNRNP_COMPLEX	GO_U4_U6_X_U5_TRI_SNRNP_COMPLEX		21	0.5152501	1.2774936	0.1812749	0.53778976	1.0	16130	tags=57%, list=30%, signal=81%
GO_SITE_OF_DOUBLE_STRAND_BREAK	GO_SITE_OF_DOUBLE_STRAND_BREAK		31	0.49157423	1.2767683	0.15821502	0.5388285	1.0	16806	tags=71%, list=31%, signal=103%
GO_NUCLEOSIDE_SALVAGE	GO_NUCLEOSIDE_SALVAGE		17	0.49754992	1.2736233	0.1611002	0.5478625	1.0	11471	tags=53%, list=21%, signal=67%
GO_RESPONSE_TO_TESTOSTERONE	GO_RESPONSE_TO_TESTOSTERONE		38	0.37688267	1.2724429	0.055658627	0.5503321	1.0	11776	tags=42%, list=22%, signal=54%
GO_DEOXYRIBOSE_PHOSPHATE_CATABOLIC_PROCESS	GO_DEOXYRIBOSE_PHOSPHATE_CATABOLIC_PROCESS		21	0.47944283	1.2721694	0.15944882	0.54972386	1.0	8670	tags=43%, list=16%, signal=51%
GO_ATP_DEPENDENT_DNA_HELICASE_ACTIVITY	GO_ATP_DEPENDENT_DNA_HELICASE_ACTIVITY		34	0.5276469	1.2721169	0.20750988	0.54848176	1.0	12668	tags=41%, list=23%, signal=54%
GO_REGULATION_OF_RELEASE_OF_CYTOCHROME_C_FROM_MITOCHONDRIA	GO_REGULATION_OF_RELEASE_OF_CYTOCHROME_C_FROM_MITOCHONDRIA		43	0.38375053	1.2717122	0.09213052	0.54841673	1.0	12032	tags=44%, list=22%, signal=57%
GO_REGULATION_OF_PROTEIN_TARGETING_TO_MITOCHONDRION	GO_REGULATION_OF_PROTEIN_TARGETING_TO_MITOCHONDRION		96	0.3748051	1.2692473	0.08527132	0.555183	1.0	5564	tags=24%, list=10%, signal=27%
GO_POSTTRANSCRIPTIONAL_REGULATION_OF_GENE_EXPRESSION	GO_POSTTRANSCRIPTIONAL_REGULATION_OF_GENE_EXPRESSION		432	0.36504003	1.2686863	0.12190476	0.555562	1.0	11962	tags=40%, list=22%, signal=51%
GO_PHOSPHATASE_COMPLEX	GO_PHOSPHATASE_COMPLEX		47	0.44786227	1.2678083	0.17004049	0.5571988	1.0	12959	tags=43%, list=24%, signal=56%
GO_AXONEME_ASSEMBLY	GO_AXONEME_ASSEMBLY		38	0.47528258	1.2677882	0.18359375	0.55583555	1.0	13323	tags=50%, list=25%, signal=66%
GO_INACTIVATION_OF_MAPK_ACTIVITY	GO_INACTIVATION_OF_MAPK_ACTIVITY		26	0.42446157	1.2675474	0.12007505	0.5552385	1.0	3332	tags=27%, list=6%, signal=29%
GO_DOUBLE_STRANDED_RNA_BINDING	GO_DOUBLE_STRANDED_RNA_BINDING		59	0.43522266	1.2671196	0.156	0.5551836	1.0	12635	tags=46%, list=23%, signal=60%
GO_DNA_N_GLYCOSYLASE_ACTIVITY	GO_DNA_N_GLYCOSYLASE_ACTIVITY		15	0.54111755	1.2660052	0.17768595	0.55741453	1.0	11145	tags=60%, list=21%, signal=75%
GO_PREASSEMBLY_OF_GPI_ANCHOR_IN_ER_MEMBRANE	GO_PREASSEMBLY_OF_GPI_ANCHOR_IN_ER_MEMBRANE		15	0.5094757	1.2659045	0.16633266	0.55632657	1.0	10517	tags=47%, list=19%, signal=58%
GO_TRANSFERASE_ACTIVITY_TRANSFERRING_ALKYL_OR_ARYL_OTHER_THAN_METHYL_GROUPS	GO_TRANSFERASE_ACTIVITY_TRANSFERRING_ALKYL_OR_ARYL_OTHER_THAN_METHYL_GROUPS		61	0.40523115	1.2645366	0.106930695	0.5594987	1.0	12171	tags=39%, list=22%, signal=51%
GO_SINGLE_STRANDED_RNA_BINDING	GO_SINGLE_STRANDED_RNA_BINDING		63	0.44960892	1.264272	0.18307087	0.558967	1.0	12668	tags=56%, list=23%, signal=72%
GO_XY_BODY	GO_XY_BODY		15	0.50653195	1.2637031	0.17054264	0.55939716	1.0	15365	tags=60%, list=28%, signal=84%
GO_SMN_SM_PROTEIN_COMPLEX	GO_SMN_SM_PROTEIN_COMPLEX		17	0.5921375	1.2635803	0.23991935	0.55840254	1.0	16185	tags=65%, list=30%, signal=92%
GO_METHYLATED_HISTONE_BINDING	GO_METHYLATED_HISTONE_BINDING		52	0.45081374	1.2628187	0.1770428	0.55949724	1.0	9187	tags=31%, list=17%, signal=37%
GO_REGULATION_OF_TELOMERASE_ACTIVITY	GO_REGULATION_OF_TELOMERASE_ACTIVITY		42	0.43173167	1.2626193	0.156	0.55881894	1.0	14910	tags=48%, list=27%, signal=66%
GO_EPHRIN_RECEPTOR_BINDING	GO_EPHRIN_RECEPTOR_BINDING		24	0.45315307	1.2624621	0.12573674	0.557999	1.0	7282	tags=29%, list=13%, signal=34%
GO_PROTEIN_K63_LINKED_DEUBIQUITINATION	GO_PROTEIN_K63_LINKED_DEUBIQUITINATION		24	0.44016013	1.2620323	0.15234375	0.5580244	1.0	5014	tags=29%, list=9%, signal=32%
GO_DNA_LIGATION	GO_DNA_LIGATION		16	0.52651185	1.261741	0.18145956	0.5576334	1.0	16221	tags=63%, list=30%, signal=89%
GO_TRANSLATION_ELONGATION_FACTOR_ACTIVITY	GO_TRANSLATION_ELONGATION_FACTOR_ACTIVITY		20	0.5064064	1.261241	0.16869919	0.55784	1.0	9071	tags=50%, list=17%, signal=60%
GO_RNA_POLYMERASE_CORE_ENZYME_BINDING	GO_RNA_POLYMERASE_CORE_ENZYME_BINDING		19	0.4978789	1.2600139	0.18962076	0.5606427	1.0	2403	tags=21%, list=4%, signal=22%
GO_NUCLEOTIDE_EXCISION_REPAIR_DNA_DUPLEX_UNWINDING	GO_NUCLEOTIDE_EXCISION_REPAIR_DNA_DUPLEX_UNWINDING		22	0.48272857	1.2593659	0.18301886	0.5613776	1.0	10754	tags=36%, list=20%, signal=45%
GO_PRONUCLEUS	GO_PRONUCLEUS		15	0.5643837	1.2593415	0.19267823	0.56007797	1.0	12328	tags=60%, list=23%, signal=78%
GO_NUCLEAR_ENVELOPE	GO_NUCLEAR_ENVELOPE		404	0.3517528	1.2588845	0.09664694	0.5602207	1.0	11742	tags=37%, list=22%, signal=46%
GO_RNA_POLYMERASE_BINDING	GO_RNA_POLYMERASE_BINDING		32	0.4563617	1.2568117	0.1875	0.5656356	1.0	15079	tags=50%, list=28%, signal=69%
GO_NEGATIVE_REGULATION_OF_CELL_CYCLE_G2_M_PHASE_TRANSITION	GO_NEGATIVE_REGULATION_OF_CELL_CYCLE_G2_M_PHASE_TRANSITION		24	0.4728226	1.2566673	0.17635271	0.5647507	1.0	15819	tags=63%, list=29%, signal=88%
GO_CELLULAR_RESPONSE_TO_EPIDERMAL_GROWTH_FACTOR_STIMULUS	GO_CELLULAR_RESPONSE_TO_EPIDERMAL_GROWTH_FACTOR_STIMULUS		24	0.4302318	1.2561588	0.13068181	0.56505376	1.0	13465	tags=50%, list=25%, signal=66%
GO_TETRAPYRROLE_BIOSYNTHETIC_PROCESS	GO_TETRAPYRROLE_BIOSYNTHETIC_PROCESS		27	0.42015338	1.2555399	0.14229248	0.5656371	1.0	15737	tags=48%, list=29%, signal=68%
GO_NUCLEAR_MATRIX	GO_NUCLEAR_MATRIX		96	0.3984014	1.2551703	0.15900382	0.5655451	1.0	11623	tags=36%, list=21%, signal=46%
GO_MEMBRANE_DISASSEMBLY	GO_MEMBRANE_DISASSEMBLY		45	0.49586123	1.254972	0.20081136	0.564788	1.0	17797	tags=67%, list=33%, signal=99%
GO_TRANS_GOLGI_NETWORK_MEMBRANE	GO_TRANS_GOLGI_NETWORK_MEMBRANE		77	0.39322537	1.2540705	0.13487476	0.5663389	1.0	13832	tags=48%, list=25%, signal=64%
GO_CENTROSOME	GO_CENTROSOME		475	0.38074872	1.2538227	0.15757576	0.5657713	1.0	12721	tags=39%, list=23%, signal=51%
GO_MONOSACCHARIDE_CATABOLIC_PROCESS	GO_MONOSACCHARIDE_CATABOLIC_PROCESS		56	0.43704554	1.2537985	0.15322581	0.56449157	1.0	7516	tags=32%, list=14%, signal=37%
GO_NEGATIVE_REGULATION_OF_DNA_REPLICATION	GO_NEGATIVE_REGULATION_OF_DNA_REPLICATION		55	0.43025237	1.2529573	0.17681728	0.5658955	1.0	12742	tags=40%, list=23%, signal=52%
GO_RESPONSE_TO_AMPHETAMINE	GO_RESPONSE_TO_AMPHETAMINE		30	0.44223553	1.2523863	0.12969925	0.56645966	1.0	14034	tags=50%, list=26%, signal=67%
GO_AXONEMAL_DYNEIN_COMPLEX_ASSEMBLY	GO_AXONEMAL_DYNEIN_COMPLEX_ASSEMBLY		19	0.53651667	1.252009	0.22093023	0.56646633	1.0	4654	tags=32%, list=9%, signal=35%
GO_TELOMERE_CAPPING	GO_TELOMERE_CAPPING		29	0.49223813	1.2516055	0.20594479	0.56654924	1.0	12389	tags=48%, list=23%, signal=63%
GO_CUL4_RING_E3_UBIQUITIN_LIGASE_COMPLEX	GO_CUL4_RING_E3_UBIQUITIN_LIGASE_COMPLEX		25	0.4404982	1.2511973	0.14807692	0.5665889	1.0	13093	tags=48%, list=24%, signal=63%
GO_REGULATION_OF_MITOPHAGY	GO_REGULATION_OF_MITOPHAGY		42	0.39686966	1.2495595	0.1476378	0.57048255	1.0	7080	tags=29%, list=13%, signal=33%
GO_N_ACETYLTRANSFERASE_ACTIVITY	GO_N_ACETYLTRANSFERASE_ACTIVITY		81	0.42999113	1.2477275	0.19298245	0.5752683	1.0	14151	tags=42%, list=26%, signal=57%
GO_REGULATION_OF_TELOMERE_MAINTENANCE_VIA_TELOMERE_LENGTHENING	GO_REGULATION_OF_TELOMERE_MAINTENANCE_VIA_TELOMERE_LENGTHENING		50	0.4537352	1.2473997	0.21713148	0.57506555	1.0	14910	tags=48%, list=27%, signal=66%
GO_GLYCOSYL_COMPOUND_METABOLIC_PROCESS	GO_GLYCOSYL_COMPOUND_METABOLIC_PROCESS		354	0.35110074	1.2472326	0.13293651	0.57425624	1.0	13500	tags=39%, list=25%, signal=52%
GO_HISTONE_EXCHANGE	GO_HISTONE_EXCHANGE		52	0.48355985	1.2470247	0.23206751	0.57360256	1.0	14591	tags=54%, list=27%, signal=74%
GO_VIRAL_LIFE_CYCLE	GO_VIRAL_LIFE_CYCLE		283	0.36813113	1.2464249	0.1521739	0.57429546	1.0	10274	tags=39%, list=19%, signal=47%
GO_RECIPROCAL_DNA_RECOMBINATION	GO_RECIPROCAL_DNA_RECOMBINATION		39	0.46062115	1.2462988	0.18199609	0.5733786	1.0	13405	tags=51%, list=25%, signal=68%
GO_REGULATION_OF_DNA_REPAIR	GO_REGULATION_OF_DNA_REPAIR		72	0.44933596	1.2460455	0.19569471	0.57295454	1.0	17033	tags=60%, list=31%, signal=87%
GO_RESPONSE_TO_GAMMA_RADIATION	GO_RESPONSE_TO_GAMMA_RADIATION		50	0.41772172	1.2456905	0.14694656	0.5727128	1.0	6583	tags=26%, list=12%, signal=30%
GO_NUCLEAR_EXPORT	GO_NUCLEAR_EXPORT		144	0.4452577	1.245671	0.20523138	0.57145095	1.0	13483	tags=45%, list=25%, signal=60%
GO_TRANSFERASE_ACTIVITY_TRANSFERRING_ACYL_GROUPS	GO_TRANSFERASE_ACTIVITY_TRANSFERRING_ACYL_GROUPS		241	0.34777364	1.2454386	0.10172745	0.5708703	1.0	11806	tags=34%, list=22%, signal=43%
GO_HISTONE_H2A_ACETYLATION	GO_HISTONE_H2A_ACETYLATION		15	0.4919319	1.244556	0.20628683	0.57245255	1.0	5291	tags=40%, list=10%, signal=44%
GO_ATPASE_ACTIVITY_COUPLED	GO_ATPASE_ACTIVITY_COUPLED		311	0.36406106	1.2444421	0.13476562	0.57153666	1.0	12503	tags=40%, list=23%, signal=52%
GO_RESPONSE_TO_INTERFERON_ALPHA	GO_RESPONSE_TO_INTERFERON_ALPHA		20	0.56638	1.2430693	0.21242484	0.5747276	1.0	10483	tags=45%, list=19%, signal=56%
GO_CELLULAR_RESPONSE_TO_UV	GO_CELLULAR_RESPONSE_TO_UV		65	0.40149465	1.2421709	0.147929	0.57644665	1.0	14176	tags=52%, list=26%, signal=71%
GO_RECOMBINATIONAL_REPAIR	GO_RECOMBINATIONAL_REPAIR		72	0.46818802	1.2416537	0.21960784	0.57684314	1.0	17285	tags=65%, list=32%, signal=96%
GO_REGULATION_OF_RESPIRATORY_GASEOUS_EXCHANGE	GO_REGULATION_OF_RESPIRATORY_GASEOUS_EXCHANGE		21	0.50615424	1.2411107	0.19842829	0.57728803	1.0	9745	tags=48%, list=18%, signal=58%
GO_RIBOSOMAL_SMALL_SUBUNIT_ASSEMBLY	GO_RIBOSOMAL_SMALL_SUBUNIT_ASSEMBLY		17	0.5571163	1.2407538	0.24031007	0.5771399	1.0	14288	tags=65%, list=26%, signal=88%
GO_ATP_DEPENDENT_MICROTUBULE_MOTOR_ACTIVITY	GO_ATP_DEPENDENT_MICROTUBULE_MOTOR_ACTIVITY		18	0.529685	1.2384292	0.2235529	0.5836006	1.0	10939	tags=44%, list=20%, signal=56%
GO_ESCRT_COMPLEX	GO_ESCRT_COMPLEX		24	0.48256207	1.2383105	0.20916335	0.5827069	1.0	17779	tags=63%, list=33%, signal=93%
GO_CENTRIOLE	GO_CENTRIOLE		99	0.42129284	1.237616	0.17959183	0.5836925	1.0	12500	tags=43%, list=23%, signal=56%
GO_NAD_METABOLIC_PROCESS	GO_NAD_METABOLIC_PROCESS		50	0.41583818	1.2359543	0.1910569	0.5879378	1.0	17280	tags=56%, list=32%, signal=82%
GO_NEGATIVE_REGULATION_OF_MRNA_SPLICING_VIA_SPLICEOSOME	GO_NEGATIVE_REGULATION_OF_MRNA_SPLICING_VIA_SPLICEOSOME		19	0.58240414	1.235317	0.26706827	0.58878154	1.0	17043	tags=74%, list=31%, signal=107%
GO_ACETYLTRANSFERASE_COMPLEX	GO_ACETYLTRANSFERASE_COMPLEX		91	0.4240723	1.2349856	0.22682446	0.5885761	1.0	11669	tags=42%, list=22%, signal=53%
GO_NUCLEAR_UBIQUITIN_LIGASE_COMPLEX	GO_NUCLEAR_UBIQUITIN_LIGASE_COMPLEX		40	0.45151967	1.2348716	0.1971831	0.58760303	1.0	15388	tags=48%, list=28%, signal=66%
GO_ACIDIC_AMINO_ACID_TRANSPORT	GO_ACIDIC_AMINO_ACID_TRANSPORT		21	0.47634485	1.2339658	0.15079366	0.58935255	1.0	11380	tags=57%, list=21%, signal=72%
GO_OXIDOREDUCTION_COENZYME_METABOLIC_PROCESS	GO_OXIDOREDUCTION_COENZYME_METABOLIC_PROCESS		99	0.3857422	1.2334203	0.17373738	0.58976895	1.0	13874	tags=44%, list=26%, signal=60%
GO_INTRACILIARY_TRANSPORT_PARTICLE_B	GO_INTRACILIARY_TRANSPORT_PARTICLE_B		19	0.5755565	1.2327964	0.2504817	0.5905818	1.0	11583	tags=53%, list=21%, signal=67%
GO__DE_NOVO_PROTEIN_FOLDING	GO__DE_NOVO_PROTEIN_FOLDING		18	0.43431348	1.2327291	0.18426502	0.58949	1.0	11652	tags=50%, list=21%, signal=64%
GO_INTRINSIC_COMPONENT_OF_MITOCHONDRIAL_MEMBRANE	GO_INTRINSIC_COMPONENT_OF_MITOCHONDRIAL_MEMBRANE		45	0.3967214	1.2325029	0.17682926	0.5889875	1.0	12444	tags=42%, list=23%, signal=55%
GO_NEGATIVE_REGULATION_OF_CHROMOSOME_ORGANIZATION	GO_NEGATIVE_REGULATION_OF_CHROMOSOME_ORGANIZATION		96	0.43866062	1.2305878	0.23379175	0.5940734	1.0	12907	tags=44%, list=24%, signal=57%
GO_REGULATION_OF_PROTEIN_LOCALIZATION_TO_CELL_SURFACE	GO_REGULATION_OF_PROTEIN_LOCALIZATION_TO_CELL_SURFACE		27	0.43006748	1.2301946	0.14591439	0.5940387	1.0	12075	tags=44%, list=22%, signal=57%
GO_RESPONSE_TO_AMINE	GO_RESPONSE_TO_AMINE		48	0.40379682	1.230085	0.10325048	0.5931159	1.0	14034	tags=46%, list=26%, signal=62%
GO_TRANSFERASE_ACTIVITY_TRANSFERRING_ACYL_GROUPS_OTHER_THAN_AMINO_ACYL_GROUPS	GO_TRANSFERASE_ACTIVITY_TRANSFERRING_ACYL_GROUPS_OTHER_THAN_AMINO_ACYL_GROUPS		204	0.34771693	1.2298442	0.11854684	0.59261394	1.0	11806	tags=32%, list=22%, signal=41%
GO_NEGATIVE_REGULATION_OF_PROTEIN_CATABOLIC_PROCESS	GO_NEGATIVE_REGULATION_OF_PROTEIN_CATABOLIC_PROCESS		106	0.37407598	1.2288278	0.15192308	0.59469527	1.0	15304	tags=50%, list=28%, signal=70%
GO_ESTABLISHMENT_OF_PROTEIN_LOCALIZATION_TO_MEMBRANE	GO_ESTABLISHMENT_OF_PROTEIN_LOCALIZATION_TO_MEMBRANE		261	0.3615397	1.2285237	0.16506718	0.5943985	1.0	10143	tags=34%, list=19%, signal=42%
GO_N_METHYLTRANSFERASE_ACTIVITY	GO_N_METHYLTRANSFERASE_ACTIVITY		81	0.42234254	1.2276392	0.1940594	0.5959384	1.0	11747	tags=44%, list=22%, signal=57%
GO_CELLULAR_RESPONSE_TO_DSRNA	GO_CELLULAR_RESPONSE_TO_DSRNA		34	0.42667928	1.2257642	0.17303823	0.60088	1.0	15294	tags=59%, list=28%, signal=82%
GO_REGULATION_OF_INTRINSIC_APOPTOTIC_SIGNALING_PATHWAY_BY_P53_CLASS_MEDIATOR	GO_REGULATION_OF_INTRINSIC_APOPTOTIC_SIGNALING_PATHWAY_BY_P53_CLASS_MEDIATOR		22	0.40642554	1.222298	0.14734773	0.6109326	1.0	12078	tags=50%, list=22%, signal=64%
GO_THYROID_HORMONE_RECEPTOR_BINDING	GO_THYROID_HORMONE_RECEPTOR_BINDING		30	0.46018186	1.222076	0.236	0.6103509	1.0	14151	tags=53%, list=26%, signal=72%
GO_U12_TYPE_SPLICEOSOMAL_COMPLEX	GO_U12_TYPE_SPLICEOSOMAL_COMPLEX		26	0.527534	1.2215959	0.24744377	0.6106737	1.0	17329	tags=62%, list=32%, signal=90%
GO_MRNA_BINDING	GO_MRNA_BINDING		149	0.39702088	1.2208568	0.2015504	0.6119077	1.0	12175	tags=40%, list=22%, signal=51%
GO_REGULATION_OF_GENE_EXPRESSION_EPIGENETIC	GO_REGULATION_OF_GENE_EXPRESSION_EPIGENETIC		221	0.38836658	1.2203676	0.2055336	0.61221945	1.0	12612	tags=38%, list=23%, signal=50%
GO_PYRUVATE_METABOLIC_PROCESS	GO_PYRUVATE_METABOLIC_PROCESS		61	0.3682108	1.220164	0.124236256	0.61159575	1.0	17280	tags=61%, list=32%, signal=89%
GO_POSITIVE_REGULATION_OF_DNA_METABOLIC_PROCESS	GO_POSITIVE_REGULATION_OF_DNA_METABOLIC_PROCESS		182	0.35256577	1.2201608	0.15779468	0.61030066	1.0	11385	tags=35%, list=21%, signal=44%
GO_SPINDLE_ASSEMBLY	GO_SPINDLE_ASSEMBLY		69	0.42209303	1.219744	0.2398374	0.61038	1.0	15566	tags=51%, list=29%, signal=71%
GO_POSITIVE_REGULATION_OF_DNA_TEMPLATED_TRANSCRIPTION_INITIATION	GO_POSITIVE_REGULATION_OF_DNA_TEMPLATED_TRANSCRIPTION_INITIATION		24	0.48145807	1.2194334	0.22424242	0.61012965	1.0	17801	tags=67%, list=33%, signal=99%
GO_CENTRIOLE_ASSEMBLY	GO_CENTRIOLE_ASSEMBLY		19	0.49224266	1.2186782	0.22937626	0.61127657	1.0	13111	tags=58%, list=24%, signal=76%
GO_CELL_AGING	GO_CELL_AGING		67	0.3705897	1.2177402	0.16064256	0.61317253	1.0	10433	tags=37%, list=19%, signal=46%
GO_KINETOCHORE	GO_KINETOCHORE		111	0.4605884	1.2165486	0.26122448	0.61589813	1.0	13322	tags=47%, list=25%, signal=62%
GO_N_TERMINAL_PROTEIN_AMINO_ACID_MODIFICATION	GO_N_TERMINAL_PROTEIN_AMINO_ACID_MODIFICATION		24	0.43369353	1.2162389	0.18058252	0.61565816	1.0	14145	tags=54%, list=26%, signal=73%
GO_DEAMINASE_ACTIVITY	GO_DEAMINASE_ACTIVITY		33	0.43689686	1.2161716	0.18019801	0.61459243	1.0	12110	tags=39%, list=22%, signal=51%
GO_DNA_DEPENDENT_DNA_REPLICATION	GO_DNA_DEPENDENT_DNA_REPLICATION		94	0.4806704	1.2161552	0.27416173	0.613359	1.0	13507	tags=45%, list=25%, signal=59%
GO_RNA_PHOSPHODIESTER_BOND_HYDROLYSIS_EXONUCLEOLYTIC	GO_RNA_PHOSPHODIESTER_BOND_HYDROLYSIS_EXONUCLEOLYTIC		34	0.4695738	1.2156056	0.24193548	0.6138815	1.0	18008	tags=68%, list=33%, signal=101%
GO_NUCLEOTIDE_EXCISION_REPAIR_DNA_GAP_FILLING	GO_NUCLEOTIDE_EXCISION_REPAIR_DNA_GAP_FILLING		24	0.48303366	1.2155701	0.2407045	0.6127047	1.0	14106	tags=54%, list=26%, signal=73%
GO_CYTOPLASMIC_PATTERN_RECOGNITION_RECEPTOR_SIGNALING_PATHWAY	GO_CYTOPLASMIC_PATTERN_RECOGNITION_RECEPTOR_SIGNALING_PATHWAY		33	0.40720755	1.2154804	0.18808194	0.6117454	1.0	16823	tags=52%, list=31%, signal=75%
GO_PHOSPHOLIPID_DEPHOSPHORYLATION	GO_PHOSPHOLIPID_DEPHOSPHORYLATION		33	0.4276517	1.2154038	0.16370809	0.610725	1.0	11414	tags=42%, list=21%, signal=54%
GO_MYD88_INDEPENDENT_TOLL_LIKE_RECEPTOR_SIGNALING_PATHWAY	GO_MYD88_INDEPENDENT_TOLL_LIKE_RECEPTOR_SIGNALING_PATHWAY		30	0.43460327	1.2148242	0.20472442	0.6113304	1.0	6407	tags=30%, list=12%, signal=34%
GO_NUCLEUS_ORGANIZATION	GO_NUCLEUS_ORGANIZATION		132	0.38064376	1.2142622	0.18032786	0.6118564	1.0	11320	tags=36%, list=21%, signal=46%
GO_MITOTIC_SPINDLE_ORGANIZATION	GO_MITOTIC_SPINDLE_ORGANIZATION		67	0.4528584	1.2141451	0.24793388	0.61094415	1.0	15325	tags=55%, list=28%, signal=77%
GO_CENTROSOME_CYCLE	GO_CENTROSOME_CYCLE		45	0.4293801	1.213886	0.20408164	0.6105794	1.0	10431	tags=40%, list=19%, signal=49%
GO_DSRNA_FRAGMENTATION	GO_DSRNA_FRAGMENTATION		18	0.49419335	1.2114542	0.24701196	0.61748415	1.0	15294	tags=67%, list=28%, signal=93%
GO_PURINE_CONTAINING_COMPOUND_METABOLIC_PROCESS	GO_PURINE_CONTAINING_COMPOUND_METABOLIC_PROCESS		381	0.34070405	1.2110407	0.15643564	0.6176585	1.0	13500	tags=40%, list=25%, signal=52%
GO_SPLICEOSOMAL_TRI_SNRNP_COMPLEX	GO_SPLICEOSOMAL_TRI_SNRNP_COMPLEX		26	0.49032244	1.2108616	0.2504931	0.61703074	1.0	16185	tags=58%, list=30%, signal=82%
GO_EXONUCLEASE_ACTIVITY	GO_EXONUCLEASE_ACTIVITY		74	0.40880972	1.2105064	0.22417153	0.6169564	1.0	13919	tags=46%, list=26%, signal=62%
GO_REGULATION_OF_TRANSLATIONAL_INITIATION	GO_REGULATION_OF_TRANSLATIONAL_INITIATION		80	0.3952561	1.2100549	0.1888668	0.6171874	1.0	13066	tags=55%, list=24%, signal=72%
GO_REGULATION_OF_RNA_SPLICING	GO_REGULATION_OF_RNA_SPLICING		95	0.4282745	1.2095282	0.24409449	0.6176534	1.0	6655	tags=29%, list=12%, signal=34%
GO_RIBONUCLEOPROTEIN_COMPLEX_LOCALIZATION	GO_RIBONUCLEOPROTEIN_COMPLEX_LOCALIZATION		116	0.45468703	1.2093601	0.26838967	0.6169399	1.0	13483	tags=46%, list=25%, signal=61%
GO_CELL_CYCLE_G1_S_PHASE_TRANSITION	GO_CELL_CYCLE_G1_S_PHASE_TRANSITION		110	0.41439685	1.2086527	0.22574258	0.61805993	1.0	11767	tags=42%, list=22%, signal=53%
GO_CHROMOSOMAL_REGION	GO_CHROMOSOMAL_REGION		318	0.4095401	1.2071029	0.24285714	0.62214714	1.0	15358	tags=49%, list=28%, signal=68%
GO_RESPONSE_TO_IONIZING_RADIATION	GO_RESPONSE_TO_IONIZING_RADIATION		139	0.34833232	1.2060281	0.16023166	0.6244182	1.0	7751	tags=27%, list=14%, signal=31%
GO_REGULATION_OF_EXECUTION_PHASE_OF_APOPTOSIS	GO_REGULATION_OF_EXECUTION_PHASE_OF_APOPTOSIS		24	0.43566662	1.2058817	0.15717092	0.62363213	1.0	9869	tags=42%, list=18%, signal=51%
GO_NADP_METABOLIC_PROCESS	GO_NADP_METABOLIC_PROCESS		27	0.44435024	1.2057893	0.19583334	0.62267894	1.0	6321	tags=37%, list=12%, signal=42%
GO_HEME_BIOSYNTHETIC_PROCESS	GO_HEME_BIOSYNTHETIC_PROCESS		20	0.4092663	1.2055779	0.1888668	0.62215734	1.0	15737	tags=50%, list=29%, signal=70%
GO_MAGNESIUM_ION_BINDING	GO_MAGNESIUM_ION_BINDING		192	0.34003434	1.2055215	0.1342155	0.621108	1.0	7345	tags=23%, list=14%, signal=27%
GO_POSITIVE_REGULATION_OF_MRNA_PROCESSING	GO_POSITIVE_REGULATION_OF_MRNA_PROCESSING		31	0.46660742	1.2048007	0.22334003	0.62221897	1.0	10374	tags=35%, list=19%, signal=44%
GO_THYROID_HORMONE_METABOLIC_PROCESS	GO_THYROID_HORMONE_METABOLIC_PROCESS		15	0.5082338	1.2027309	0.21212122	0.62800664	1.0	13388	tags=53%, list=25%, signal=71%
GO_SULFUR_AMINO_ACID_BIOSYNTHETIC_PROCESS	GO_SULFUR_AMINO_ACID_BIOSYNTHETIC_PROCESS		19	0.4955645	1.202648	0.22745098	0.6270032	1.0	1590	tags=21%, list=3%, signal=22%
GO_MITOTIC_SPINDLE_ASSEMBLY	GO_MITOTIC_SPINDLE_ASSEMBLY		40	0.4476998	1.2023906	0.24335378	0.62661064	1.0	10431	tags=38%, list=19%, signal=46%
GO_GLOBAL_GENOME_NUCLEOTIDE_EXCISION_REPAIR	GO_GLOBAL_GENOME_NUCLEOTIDE_EXCISION_REPAIR		32	0.4464507	1.2014495	0.23709369	0.6285976	1.0	13093	tags=41%, list=24%, signal=54%
GO_FERROUS_IRON_BINDING	GO_FERROUS_IRON_BINDING		22	0.41145825	1.2011018	0.16666667	0.62852645	1.0	15013	tags=45%, list=28%, signal=63%
GO_ATPASE_ACTIVITY	GO_ATPASE_ACTIVITY		422	0.35234386	1.2009909	0.1879845	0.6276908	1.0	12503	tags=39%, list=23%, signal=50%
GO_PROTON_TRANSPORTING_TWO_SECTOR_ATPASE_COMPLEX_PROTON_TRANSPORTING_DOMAIN	GO_PROTON_TRANSPORTING_TWO_SECTOR_ATPASE_COMPLEX_PROTON_TRANSPORTING_DOMAIN		21	0.45560378	1.1996807	0.23232323	0.6307525	1.0	9841	tags=43%, list=18%, signal=52%
GO_AMINO_ACID_IMPORT	GO_AMINO_ACID_IMPORT		15	0.505021	1.1992711	0.2159533	0.63090444	1.0	11380	tags=67%, list=21%, signal=84%
GO_XENOPHAGY	GO_XENOPHAGY		102	0.34827656	1.1992507	0.1374502	0.6297305	1.0	12728	tags=43%, list=23%, signal=56%
GO_MACROMOLECULE_METHYLATION	GO_MACROMOLECULE_METHYLATION		191	0.39473423	1.1988226	0.2166998	0.6299875	1.0	12637	tags=43%, list=23%, signal=56%
GO_ORGANOPHOSPHATE_BIOSYNTHETIC_PROCESS	GO_ORGANOPHOSPHATE_BIOSYNTHETIC_PROCESS		437	0.3276971	1.1981745	0.13786408	0.63092446	1.0	12792	tags=39%, list=24%, signal=50%
GO_MRNA_CLEAVAGE_FACTOR_COMPLEX	GO_MRNA_CLEAVAGE_FACTOR_COMPLEX		17	0.56049633	1.1975151	0.29457363	0.6319424	1.0	6676	tags=29%, list=12%, signal=34%
GO_PROTEIN_TRANSPORT_ALONG_MICROTUBULE	GO_PROTEIN_TRANSPORT_ALONG_MICROTUBULE		27	0.52236265	1.1973374	0.2580645	0.6312962	1.0	15014	tags=67%, list=28%, signal=92%
GO_ENDOCYTIC_RECYCLING	GO_ENDOCYTIC_RECYCLING		24	0.44808996	1.196219	0.2192623	0.63384163	1.0	8868	tags=42%, list=16%, signal=50%
GO_POSITIVE_REGULATION_OF_SEQUENCE_SPECIFIC_DNA_BINDING_TRANSCRIPTION_FACTOR_ACTIVITY	GO_POSITIVE_REGULATION_OF_SEQUENCE_SPECIFIC_DNA_BINDING_TRANSCRIPTION_FACTOR_ACTIVITY		225	0.33060354	1.1953905	0.11439842	0.6354468	1.0	11760	tags=32%, list=22%, signal=41%
GO_REGULATION_OF_INTERFERON_BETA_PRODUCTION	GO_REGULATION_OF_INTERFERON_BETA_PRODUCTION		43	0.41506237	1.194182	0.20746888	0.6383918	1.0	16363	tags=58%, list=30%, signal=83%
GO_SPLICEOSOMAL_COMPLEX_ASSEMBLY	GO_SPLICEOSOMAL_COMPLEX_ASSEMBLY		51	0.51820207	1.194124	0.3057199	0.6373319	1.0	16398	tags=61%, list=30%, signal=87%
GO_CELLULAR_PROTEIN_COMPLEX_ASSEMBLY	GO_CELLULAR_PROTEIN_COMPLEX_ASSEMBLY		323	0.32681867	1.1941167	0.15667312	0.6361308	1.0	10259	tags=32%, list=19%, signal=39%
GO_NEGATIVE_REGULATION_OF_HISTONE_ACETYLATION	GO_NEGATIVE_REGULATION_OF_HISTONE_ACETYLATION		15	0.51207006	1.1935093	0.23847695	0.6368554	1.0	11899	tags=47%, list=22%, signal=60%
GO_RETINOIC_ACID_RECEPTOR_BINDING	GO_RETINOIC_ACID_RECEPTOR_BINDING		45	0.4036513	1.1929268	0.21722114	0.63751155	1.0	10292	tags=27%, list=19%, signal=33%
GO_SPERMATID_DIFFERENTIATION	GO_SPERMATID_DIFFERENTIATION		123	0.35100326	1.1915714	0.15717092	0.6407972	1.0	11730	tags=37%, list=22%, signal=48%
GO_NUCLEAR_PORE	GO_NUCLEAR_PORE		75	0.44681227	1.1914668	0.26070037	0.6399165	1.0	11742	tags=45%, list=22%, signal=58%
GO_CELLULAR_RESPONSE_TO_HEAT	GO_CELLULAR_RESPONSE_TO_HEAT		35	0.40678668	1.1910882	0.21428572	0.63994706	1.0	14156	tags=46%, list=26%, signal=62%
GO_NEGATIVE_REGULATION_OF_CELLULAR_PROTEIN_CATABOLIC_PROCESS	GO_NEGATIVE_REGULATION_OF_CELLULAR_PROTEIN_CATABOLIC_PROCESS		61	0.39590073	1.1910093	0.22328244	0.6390146	1.0	15304	tags=54%, list=28%, signal=75%
GO_POSITIVE_REGULATION_OF_CHROMOSOME_ORGANIZATION	GO_POSITIVE_REGULATION_OF_CHROMOSOME_ORGANIZATION		146	0.3779195	1.190847	0.19649805	0.63833433	1.0	9433	tags=32%, list=17%, signal=39%
GO_POSITIVE_REGULATION_OF_NF_KAPPAB_TRANSCRIPTION_FACTOR_ACTIVITY	GO_POSITIVE_REGULATION_OF_NF_KAPPAB_TRANSCRIPTION_FACTOR_ACTIVITY		131	0.35359454	1.1902853	0.17159763	0.6390182	1.0	12475	tags=35%, list=23%, signal=45%
GO_ASPARTATE_FAMILY_AMINO_ACID_BIOSYNTHETIC_PROCESS	GO_ASPARTATE_FAMILY_AMINO_ACID_BIOSYNTHETIC_PROCESS		23	0.43762144	1.1883472	0.22568093	0.64457506	1.0	8349	tags=39%, list=15%, signal=46%
GO_EXON_EXON_JUNCTION_COMPLEX	GO_EXON_EXON_JUNCTION_COMPLEX		21	0.47954887	1.1880141	0.2701613	0.644421	1.0	17259	tags=62%, list=32%, signal=91%
GO_MITOCHONDRIAL_TRANSPORT	GO_MITOCHONDRIAL_TRANSPORT		165	0.34167445	1.1871777	0.19387755	0.6460413	1.0	16443	tags=47%, list=30%, signal=68%
GO_MIDBODY	GO_MIDBODY		124	0.36270902	1.1860043	0.20080322	0.6487463	1.0	12653	tags=36%, list=23%, signal=47%
GO_CELLULAR_RESPIRATION	GO_CELLULAR_RESPIRATION		137	0.40681693	1.1843482	0.27559054	0.6533158	1.0	14822	tags=49%, list=27%, signal=67%
GO_PROTEIN_K48_LINKED_DEUBIQUITINATION	GO_PROTEIN_K48_LINKED_DEUBIQUITINATION		20	0.44307813	1.1836945	0.23564357	0.65427953	1.0	14469	tags=50%, list=27%, signal=68%
GO_NEGATIVE_REGULATION_OF_RNA_SPLICING	GO_NEGATIVE_REGULATION_OF_RNA_SPLICING		24	0.53246826	1.1827368	0.3108911	0.65639377	1.0	17601	tags=71%, list=32%, signal=105%
GO_N_ACYLTRANSFERASE_ACTIVITY	GO_N_ACYLTRANSFERASE_ACTIVITY		98	0.38004053	1.1822143	0.23809524	0.6570089	1.0	14151	tags=38%, list=26%, signal=51%
GO_NEGATIVE_REGULATION_OF_PROTEIN_MODIFICATION_BY_SMALL_PROTEIN_CONJUGATION_OR_REMOVAL	GO_NEGATIVE_REGULATION_OF_PROTEIN_MODIFICATION_BY_SMALL_PROTEIN_CONJUGATION_OR_REMOVAL		136	0.36824167	1.1815277	0.2358871	0.65812296	1.0	13820	tags=38%, list=25%, signal=51%
GO_CYTOPLASMIC_MICROTUBULE_ORGANIZATION	GO_CYTOPLASMIC_MICROTUBULE_ORGANIZATION		39	0.39741537	1.1806488	0.24497992	0.6599845	1.0	9023	tags=36%, list=17%, signal=43%
GO_REGULATION_OF_ESTABLISHMENT_OF_PROTEIN_LOCALIZATION_TO_MITOCHONDRION	GO_REGULATION_OF_ESTABLISHMENT_OF_PROTEIN_LOCALIZATION_TO_MITOCHONDRION		126	0.3401251	1.180483	0.18992248	0.6593148	1.0	5564	tags=21%, list=10%, signal=24%
GO_LIGASE_ACTIVITY_FORMING_CARBON_SULFUR_BONDS	GO_LIGASE_ACTIVITY_FORMING_CARBON_SULFUR_BONDS		40	0.44867447	1.1799043	0.27380952	0.66005844	1.0	11488	tags=38%, list=21%, signal=48%
GO_MODULATION_OF_EXCITATORY_POSTSYNAPTIC_POTENTIAL	GO_MODULATION_OF_EXCITATORY_POSTSYNAPTIC_POTENTIAL		30	0.45693254	1.1792525	0.23506744	0.66098416	1.0	13424	tags=57%, list=25%, signal=75%
GO_NEGATIVE_REGULATION_OF_DNA_METABOLIC_PROCESS	GO_NEGATIVE_REGULATION_OF_DNA_METABOLIC_PROCESS		109	0.38226807	1.1780505	0.24131274	0.6637085	1.0	14503	tags=41%, list=27%, signal=56%
GO_ORGANELLE_ASSEMBLY	GO_ORGANELLE_ASSEMBLY		477	0.33537066	1.1774958	0.21541502	0.66429365	1.0	13502	tags=41%, list=25%, signal=54%
GO_REGULATION_OF_CELLULAR_AMIDE_METABOLIC_PROCESS	GO_REGULATION_OF_CELLULAR_AMIDE_METABOLIC_PROCESS		337	0.34172425	1.1753389	0.19460501	0.67028487	1.0	11962	tags=40%, list=22%, signal=51%
GO_CONDENSED_CHROMOSOME_CENTROMERIC_REGION	GO_CONDENSED_CHROMOSOME_CENTROMERIC_REGION		93	0.44554076	1.1749382	0.30309278	0.6703339	1.0	13322	tags=48%, list=25%, signal=64%
GO_NEGATIVE_REGULATION_OF_T_CELL_MEDIATED_IMMUNITY	GO_NEGATIVE_REGULATION_OF_T_CELL_MEDIATED_IMMUNITY		16	0.41946927	1.1736246	0.19803922	0.6735946	1.0	5559	tags=31%, list=10%, signal=35%
GO_HISTONE_H3_ACETYLATION	GO_HISTONE_H3_ACETYLATION		46	0.42958155	1.1727073	0.24089068	0.67564	1.0	11669	tags=39%, list=22%, signal=50%
GO_RESPONSE_TO_UV_B	GO_RESPONSE_TO_UV_B		16	0.47690684	1.1719593	0.24358974	0.6769354	1.0	8591	tags=38%, list=16%, signal=45%
GO_ACID_AMINO_ACID_LIGASE_ACTIVITY	GO_ACID_AMINO_ACID_LIGASE_ACTIVITY		19	0.42541343	1.1719545	0.21920668	0.67571205	1.0	11421	tags=42%, list=21%, signal=53%
GO_HEXOSE_CATABOLIC_PROCESS	GO_HEXOSE_CATABOLIC_PROCESS		47	0.40516302	1.171326	0.228	0.67663	1.0	7516	tags=32%, list=14%, signal=37%
GO_RESPIRATORY_CHAIN	GO_RESPIRATORY_CHAIN		78	0.4353139	1.1703358	0.29735234	0.67892313	1.0	12747	tags=45%, list=23%, signal=59%
GO_H4_HISTONE_ACETYLTRANSFERASE_COMPLEX	GO_H4_HISTONE_ACETYLTRANSFERASE_COMPLEX		18	0.44705233	1.1700959	0.2660194	0.6785771	1.0	9816	tags=44%, list=18%, signal=54%
GO_NADH_METABOLIC_PROCESS	GO_NADH_METABOLIC_PROCESS		33	0.41039374	1.1696845	0.24481328	0.67880803	1.0	17280	tags=55%, list=32%, signal=80%
GO_DNA_DEPENDENT_DNA_REPLICATION_MAINTENANCE_OF_FIDELITY	GO_DNA_DEPENDENT_DNA_REPLICATION_MAINTENANCE_OF_FIDELITY		21	0.47228003	1.1695031	0.28265107	0.6782167	1.0	14503	tags=52%, list=27%, signal=71%
GO_POSITIVE_REGULATION_OF_MITOCHONDRION_ORGANIZATION	GO_POSITIVE_REGULATION_OF_MITOCHONDRION_ORGANIZATION		157	0.32753375	1.1684589	0.18058252	0.68055123	1.0	12049	tags=32%, list=22%, signal=42%
GO_POSITIVE_REGULATION_OF_TELOMERE_MAINTENANCE_VIA_TELOMERE_LENGTHENING	GO_POSITIVE_REGULATION_OF_TELOMERE_MAINTENANCE_VIA_TELOMERE_LENGTHENING		33	0.42392385	1.1684461	0.2771318	0.67937034	1.0	8651	tags=30%, list=16%, signal=36%
GO_INTRACILIARY_TRANSPORT_PARTICLE	GO_INTRACILIARY_TRANSPORT_PARTICLE		30	0.5151209	1.1683055	0.31445312	0.67864335	1.0	11928	tags=53%, list=22%, signal=68%
GO_METHYL_CPG_BINDING	GO_METHYL_CPG_BINDING		20	0.45419046	1.1674483	0.28425357	0.6804431	1.0	18782	tags=50%, list=35%, signal=76%
GO_CHROMOSOME_SEGREGATION	GO_CHROMOSOME_SEGREGATION		263	0.39767376	1.1669708	0.28484848	0.68088377	1.0	15566	tags=49%, list=29%, signal=68%
GO_PROTEIN_HETEROTETRAMERIZATION	GO_PROTEIN_HETEROTETRAMERIZATION		38	0.45645344	1.1665798	0.29079497	0.68101144	1.0	14275	tags=53%, list=26%, signal=71%
GO_HISTONE_H4_ACETYLATION	GO_HISTONE_H4_ACETYLATION		46	0.42840785	1.1665581	0.2672065	0.6798586	1.0	7534	tags=28%, list=14%, signal=33%
GO_PROTEIN_REFOLDING	GO_PROTEIN_REFOLDING		20	0.4049162	1.165732	0.212	0.6814482	1.0	11652	tags=40%, list=21%, signal=51%
GO_MITOCHONDRIAL_RESPIRATORY_CHAIN_COMPLEX_ASSEMBLY	GO_MITOCHONDRIAL_RESPIRATORY_CHAIN_COMPLEX_ASSEMBLY		64	0.42870083	1.1650337	0.26434427	0.6826084	1.0	10143	tags=39%, list=19%, signal=48%
GO_MULTI_ORGANISM_LOCALIZATION	GO_MULTI_ORGANISM_LOCALIZATION		66	0.41720638	1.1649638	0.27911645	0.6816334	1.0	11056	tags=39%, list=20%, signal=49%
GO_PYRIMIDINE_DEOXYRIBONUCLEOTIDE_METABOLIC_PROCESS	GO_PYRIMIDINE_DEOXYRIBONUCLEOTIDE_METABOLIC_PROCESS		16	0.45424855	1.1644813	0.25403225	0.6821289	1.0	7183	tags=44%, list=13%, signal=50%
GO_3_5_EXONUCLEASE_ACTIVITY	GO_3_5_EXONUCLEASE_ACTIVITY		47	0.4205909	1.1626276	0.28962818	0.687134	1.0	18008	tags=64%, list=33%, signal=95%
GO_CHROMATIN_REMODELING	GO_CHROMATIN_REMODELING		147	0.38571385	1.1620854	0.2632613	0.68786675	1.0	13476	tags=44%, list=25%, signal=59%
GO_POSITIVE_REGULATION_OF_TRANSCRIPTION_INITIATION_FROM_RNA_POLYMERASE_II_PROMOTER	GO_POSITIVE_REGULATION_OF_TRANSCRIPTION_INITIATION_FROM_RNA_POLYMERASE_II_PROMOTER		17	0.48377973	1.1620116	0.28968254	0.686894	1.0	13603	tags=53%, list=25%, signal=71%
GO_CYTOPLASMIC_MICROTUBULE	GO_CYTOPLASMIC_MICROTUBULE		52	0.3938542	1.1617024	0.27642277	0.68671733	1.0	9765	tags=37%, list=18%, signal=45%
GO_VESICLE_DOCKING_INVOLVED_IN_EXOCYTOSIS	GO_VESICLE_DOCKING_INVOLVED_IN_EXOCYTOSIS		34	0.41271463	1.1616682	0.22845691	0.685625	1.0	14356	tags=47%, list=26%, signal=64%
GO_REGULATION_OF_MITOCHONDRION_ORGANIZATION	GO_REGULATION_OF_MITOCHONDRION_ORGANIZATION		205	0.30915034	1.1605595	0.16078432	0.6881889	1.0	12049	tags=32%, list=22%, signal=41%
GO_KETONE_BIOSYNTHETIC_PROCESS	GO_KETONE_BIOSYNTHETIC_PROCESS		25	0.42077047	1.160295	0.26587301	0.6878752	1.0	12775	tags=48%, list=24%, signal=63%
GO_RESPONSE_TO_HYDROGEN_PEROXIDE	GO_RESPONSE_TO_HYDROGEN_PEROXIDE		108	0.32255843	1.1598185	0.17913386	0.6882006	1.0	13190	tags=37%, list=24%, signal=49%
GO_KINASE_ACTIVATOR_ACTIVITY	GO_KINASE_ACTIVATOR_ACTIVITY		60	0.3734032	1.1596999	0.23168316	0.68738633	1.0	8847	tags=35%, list=16%, signal=42%
GO_POSITIVE_REGULATION_OF_RESPONSE_TO_DNA_DAMAGE_STIMULUS	GO_POSITIVE_REGULATION_OF_RESPONSE_TO_DNA_DAMAGE_STIMULUS		62	0.3705464	1.1595148	0.24708171	0.6867975	1.0	10268	tags=37%, list=19%, signal=46%
GO_PHOSPHOLIPID_TRANSLOCATING_ATPASE_ACTIVITY	GO_PHOSPHOLIPID_TRANSLOCATING_ATPASE_ACTIVITY		16	0.4449763	1.1593562	0.21764706	0.68616617	1.0	7492	tags=31%, list=14%, signal=36%
GO_POSITIVE_REGULATION_OF_EXCITATORY_POSTSYNAPTIC_POTENTIAL	GO_POSITIVE_REGULATION_OF_EXCITATORY_POSTSYNAPTIC_POTENTIAL		21	0.4784217	1.1589925	0.27977315	0.6862193	1.0	13424	tags=57%, list=25%, signal=76%
GO_K63_LINKED_POLYUBIQUITIN_BINDING	GO_K63_LINKED_POLYUBIQUITIN_BINDING		18	0.430327	1.1589098	0.24898785	0.6853219	1.0	14221	tags=39%, list=26%, signal=53%
GO_SULFUR_AMINO_ACID_METABOLIC_PROCESS	GO_SULFUR_AMINO_ACID_METABOLIC_PROCESS		40	0.40459013	1.1585978	0.24366471	0.68515503	1.0	10198	tags=30%, list=19%, signal=37%
GO_VITAMIN_BIOSYNTHETIC_PROCESS	GO_VITAMIN_BIOSYNTHETIC_PROCESS		15	0.49950865	1.158547	0.27875245	0.6841291	1.0	11009	tags=47%, list=20%, signal=59%
GO_NUCLEAR_ENVELOPE_ORGANIZATION	GO_NUCLEAR_ENVELOPE_ORGANIZATION		77	0.3909598	1.1584498	0.27327934	0.6832843	1.0	11320	tags=36%, list=21%, signal=46%
GO_MOTILE_CILIUM	GO_MOTILE_CILIUM		102	0.3410926	1.1578996	0.22334003	0.6839943	1.0	11809	tags=38%, list=22%, signal=49%
GO_PROTEIN_ACYLATION	GO_PROTEIN_ACYLATION		151	0.37121436	1.1577587	0.26452905	0.68333167	1.0	15154	tags=41%, list=28%, signal=57%
GO_MICROTUBULE_ORGANIZING_CENTER_ORGANIZATION	GO_MICROTUBULE_ORGANIZING_CENTER_ORGANIZATION		82	0.38609928	1.1571323	0.26760563	0.684232	1.0	16838	tags=55%, list=31%, signal=79%
GO_POSITIVE_REGULATION_OF_HISTONE_METHYLATION	GO_POSITIVE_REGULATION_OF_HISTONE_METHYLATION		30	0.44246718	1.1570636	0.2746615	0.6833023	1.0	12375	tags=53%, list=23%, signal=69%
GO_HISTONE_MRNA_METABOLIC_PROCESS	GO_HISTONE_MRNA_METABOLIC_PROCESS		28	0.48671794	1.1570473	0.35470942	0.68218005	1.0	15039	tags=50%, list=28%, signal=69%
GO_OXIDATIVE_PHOSPHORYLATION	GO_OXIDATIVE_PHOSPHORYLATION		80	0.43583366	1.1567577	0.31836733	0.68193513	1.0	14027	tags=48%, list=26%, signal=64%
GO_MUSCLE_CELL_MIGRATION	GO_MUSCLE_CELL_MIGRATION		18	0.47549972	1.1556664	0.27416173	0.6844855	1.0	6107	tags=39%, list=11%, signal=44%
GO_NUCLEOTIDE_EXCISION_REPAIR_DNA_DAMAGE_RECOGNITION	GO_NUCLEOTIDE_EXCISION_REPAIR_DNA_DAMAGE_RECOGNITION		23	0.45055902	1.1556581	0.28544062	0.6833418	1.0	13116	tags=48%, list=24%, signal=63%
GO_NUCLEAR_IMPORT	GO_NUCLEAR_IMPORT		129	0.3618375	1.154625	0.270428	0.68560034	1.0	11154	tags=40%, list=21%, signal=50%
GO_REGULATION_OF_VIRAL_TRANSCRIPTION	GO_REGULATION_OF_VIRAL_TRANSCRIPTION		57	0.39028507	1.1543162	0.24809161	0.68549013	1.0	10652	tags=39%, list=20%, signal=48%
GO_REGULATION_OF_DEFENSE_RESPONSE_TO_VIRUS	GO_REGULATION_OF_DEFENSE_RESPONSE_TO_VIRUS		186	0.3213793	1.153878	0.15789473	0.6857393	1.0	11096	tags=34%, list=20%, signal=42%
GO_PROTEIN_ACETYLATION	GO_PROTEIN_ACETYLATION		121	0.38748646	1.1537195	0.2777778	0.68515956	1.0	15154	tags=43%, list=28%, signal=59%
GO_INORGANIC_ION_IMPORT_INTO_CELL	GO_INORGANIC_ION_IMPORT_INTO_CELL		15	0.48834252	1.152272	0.27254903	0.68864393	1.0	10189	tags=47%, list=19%, signal=57%
GO_ADP_METABOLIC_PROCESS	GO_ADP_METABOLIC_PROCESS		44	0.38568702	1.1513366	0.25826445	0.6906513	1.0	17438	tags=55%, list=32%, signal=80%
GO_REGULATION_OF_TRANSCRIPTION_ELONGATION_FROM_RNA_POLYMERASE_II_PROMOTER	GO_REGULATION_OF_TRANSCRIPTION_ELONGATION_FROM_RNA_POLYMERASE_II_PROMOTER		21	0.44404384	1.1500865	0.2725528	0.69371057	1.0	12174	tags=43%, list=22%, signal=55%
GO_REGULATION_OF_RNA_STABILITY	GO_REGULATION_OF_RNA_STABILITY		137	0.36132658	1.1500237	0.2504931	0.6927777	1.0	11203	tags=36%, list=21%, signal=45%
GO_RAN_GTPASE_BINDING	GO_RAN_GTPASE_BINDING		31	0.47138473	1.1495943	0.2930328	0.69323933	1.0	11671	tags=45%, list=22%, signal=58%
GO_COENZYME_METABOLIC_PROCESS	GO_COENZYME_METABOLIC_PROCESS		256	0.35087082	1.149208	0.2480315	0.69334346	1.0	12775	tags=37%, list=24%, signal=48%
GO_CELLULAR_SENESCENCE	GO_CELLULAR_SENESCENCE		33	0.38115957	1.1488899	0.24395162	0.6932012	1.0	9725	tags=36%, list=18%, signal=44%
GO_PURINE_CONTAINING_COMPOUND_CATABOLIC_PROCESS	GO_PURINE_CONTAINING_COMPOUND_CATABOLIC_PROCESS		49	0.36962885	1.1487467	0.2319688	0.6925264	1.0	14025	tags=41%, list=26%, signal=55%
GO_PROTEIN_LOCALIZATION_TO_MEMBRANE	GO_PROTEIN_LOCALIZATION_TO_MEMBRANE		372	0.32106805	1.1482751	0.21414913	0.692946	1.0	14445	tags=43%, list=27%, signal=59%
GO_ESC_E_Z_COMPLEX	GO_ESC_E_Z_COMPLEX		16	0.5045542	1.1480175	0.36007828	0.69266886	1.0	15435	tags=75%, list=28%, signal=105%
GO_REGULATION_OF_DEFENSE_RESPONSE_TO_VIRUS_BY_HOST	GO_REGULATION_OF_DEFENSE_RESPONSE_TO_VIRUS_BY_HOST		131	0.32489318	1.1474159	0.17764471	0.69345677	1.0	12728	tags=39%, list=23%, signal=51%
GO_4_IRON_4_SULFUR_CLUSTER_BINDING	GO_4_IRON_4_SULFUR_CLUSTER_BINDING		40	0.4123285	1.1467857	0.28988326	0.69443196	1.0	13369	tags=45%, list=25%, signal=60%
GO_SPINDLE_CHECKPOINT	GO_SPINDLE_CHECKPOINT		24	0.4719501	1.1467707	0.32997987	0.69333434	1.0	15304	tags=67%, list=28%, signal=93%
GO_PROTEIN_K48_LINKED_UBIQUITINATION	GO_PROTEIN_K48_LINKED_UBIQUITINATION		46	0.36561477	1.1461338	0.246063	0.6943785	1.0	16387	tags=46%, list=30%, signal=65%
GO_HYDROLASE_ACTIVITY_ACTING_ON_CARBON_NITROGEN_BUT_NOT_PEPTIDE_BONDS	GO_HYDROLASE_ACTIVITY_ACTING_ON_CARBON_NITROGEN_BUT_NOT_PEPTIDE_BONDS		143	0.30607665	1.1456522	0.13678373	0.69482905	1.0	10070	tags=29%, list=19%, signal=35%
GO_GOLGI_TO_VACUOLE_TRANSPORT	GO_GOLGI_TO_VACUOLE_TRANSPORT		27	0.3988246	1.144567	0.27676767	0.69734234	1.0	10485	tags=37%, list=19%, signal=46%
GO_CARBOHYDRATE_KINASE_ACTIVITY	GO_CARBOHYDRATE_KINASE_ACTIVITY		19	0.42788512	1.1433834	0.26190478	0.7002101	1.0	6546	tags=26%, list=12%, signal=30%
GO_GMP_METABOLIC_PROCESS	GO_GMP_METABOLIC_PROCESS		20	0.4036594	1.1417106	0.24898785	0.7046862	1.0	7969	tags=35%, list=15%, signal=41%
GO_LIGASE_ACTIVITY_FORMING_CARBON_NITROGEN_BONDS	GO_LIGASE_ACTIVITY_FORMING_CARBON_NITROGEN_BONDS		53	0.37868845	1.1407593	0.28230616	0.7068504	1.0	9911	tags=36%, list=18%, signal=44%
GO_COFACTOR_METABOLIC_PROCESS	GO_COFACTOR_METABOLIC_PROCESS		325	0.33901042	1.1403748	0.25097275	0.7069842	1.0	12820	tags=35%, list=24%, signal=46%
GO_LONG_TERM_MEMORY	GO_LONG_TERM_MEMORY		28	0.40354496	1.1399523	0.23941068	0.7072733	1.0	10374	tags=46%, list=19%, signal=57%
GO_DNA_TEMPLATED_TRANSCRIPTION_INITIATION	GO_DNA_TEMPLATED_TRANSCRIPTION_INITIATION		200	0.33905008	1.1398033	0.2524851	0.7066714	1.0	13046	tags=40%, list=24%, signal=52%
GO_NEGATIVE_REGULATION_OF_VIRAL_TRANSCRIPTION	GO_NEGATIVE_REGULATION_OF_VIRAL_TRANSCRIPTION		24	0.43921816	1.1397623	0.25478926	0.70569545	1.0	13157	tags=54%, list=24%, signal=71%
GO_INTRINSIC_APOPTOTIC_SIGNALING_PATHWAY_IN_RESPONSE_TO_DNA_DAMAGE	GO_INTRINSIC_APOPTOTIC_SIGNALING_PATHWAY_IN_RESPONSE_TO_DNA_DAMAGE		70	0.33986124	1.1395404	0.20970874	0.7052885	1.0	13179	tags=37%, list=24%, signal=49%
GO_PROTEIN_AUTOUBIQUITINATION	GO_PROTEIN_AUTOUBIQUITINATION		48	0.35448012	1.1390767	0.23121387	0.705759	1.0	16442	tags=54%, list=30%, signal=78%
GO_MAST_CELL_GRANULE	GO_MAST_CELL_GRANULE		21	0.42128646	1.1381704	0.24652088	0.7078398	1.0	6840	tags=43%, list=13%, signal=49%
GO_NEGATIVE_REGULATION_OF_CELL_AGING	GO_NEGATIVE_REGULATION_OF_CELL_AGING		16	0.46363682	1.1378394	0.3057199	0.70784265	1.0	15923	tags=63%, list=29%, signal=88%
GO_NEGATIVE_REGULATION_OF_DEPHOSPHORYLATION	GO_NEGATIVE_REGULATION_OF_DEPHOSPHORYLATION		74	0.34798485	1.1370571	0.24705882	0.70930946	1.0	15283	tags=46%, list=28%, signal=64%
GO_INTRINSIC_APOPTOTIC_SIGNALING_PATHWAY	GO_INTRINSIC_APOPTOTIC_SIGNALING_PATHWAY		150	0.3244435	1.1369784	0.22653061	0.70843947	1.0	13407	tags=37%, list=25%, signal=49%
GO_REGULATION_OF_DNA_TEMPLATED_TRANSCRIPTION_ELONGATION	GO_REGULATION_OF_DNA_TEMPLATED_TRANSCRIPTION_ELONGATION		39	0.381822	1.135842	0.26705652	0.7111934	1.0	12174	tags=36%, list=22%, signal=46%
GO_NEUROMUSCULAR_PROCESS_CONTROLLING_POSTURE	GO_NEUROMUSCULAR_PROCESS_CONTROLLING_POSTURE		15	0.452079	1.1345183	0.2859813	0.7145213	1.0	14441	tags=47%, list=27%, signal=64%
GO_ELECTRON_TRANSPORT_CHAIN	GO_ELECTRON_TRANSPORT_CHAIN		91	0.40764722	1.1342232	0.31337327	0.71444136	1.0	6376	tags=29%, list=12%, signal=32%
GO_PROTEIN_K63_LINKED_UBIQUITINATION	GO_PROTEIN_K63_LINKED_UBIQUITINATION		36	0.3769188	1.1329612	0.2826087	0.7176331	1.0	16442	tags=47%, list=30%, signal=68%
GO_PROTEIN_PALMITOYLATION	GO_PROTEIN_PALMITOYLATION		23	0.41972274	1.1323991	0.28143713	0.71841663	1.0	7330	tags=26%, list=14%, signal=30%
GO_THIOL_DEPENDENT_UBIQUITIN_SPECIFIC_PROTEASE_ACTIVITY	GO_THIOL_DEPENDENT_UBIQUITIN_SPECIFIC_PROTEASE_ACTIVITY		73	0.3576702	1.1320071	0.2591876	0.7186263	1.0	15150	tags=48%, list=28%, signal=66%
GO_INTERCELLULAR_BRIDGE	GO_INTERCELLULAR_BRIDGE		41	0.3755156	1.1318817	0.2851485	0.7178847	1.0	15420	tags=59%, list=28%, signal=82%
GO_REGULATION_OF_PROTEASOMAL_UBIQUITIN_DEPENDENT_PROTEIN_CATABOLIC_PROCESS	GO_REGULATION_OF_PROTEASOMAL_UBIQUITIN_DEPENDENT_PROTEIN_CATABOLIC_PROCESS		144	0.3271563	1.1315622	0.23483366	0.7178332	1.0	13492	tags=42%, list=25%, signal=56%
GO_NUCLEOTIDE_KINASE_ACTIVITY	GO_NUCLEOTIDE_KINASE_ACTIVITY		24	0.39651063	1.1311797	0.24847251	0.71804017	1.0	7969	tags=29%, list=15%, signal=34%
GO_REGULATION_OF_HISTONE_H3_K4_METHYLATION	GO_REGULATION_OF_HISTONE_H3_K4_METHYLATION		24	0.4598706	1.1301315	0.29150578	0.72050303	1.0	12616	tags=54%, list=23%, signal=71%
GO_RESPONSE_TO_UV	GO_RESPONSE_TO_UV		121	0.33839694	1.130119	0.24761905	0.71939456	1.0	13343	tags=41%, list=25%, signal=55%
GO_REGULATION_OF_VIRAL_RELEASE_FROM_HOST_CELL	GO_REGULATION_OF_VIRAL_RELEASE_FROM_HOST_CELL		31	0.41406593	1.1298431	0.30528376	0.7192539	1.0	10652	tags=32%, list=20%, signal=40%
GO_DEATH_RECEPTOR_BINDING	GO_DEATH_RECEPTOR_BINDING		18	0.4254549	1.1296589	0.28747433	0.7186982	1.0	5439	tags=33%, list=10%, signal=37%
GO_CHEMOATTRACTANT_ACTIVITY	GO_CHEMOATTRACTANT_ACTIVITY		27	0.3982612	1.1282558	0.24177949	0.7224451	1.0	15923	tags=59%, list=29%, signal=84%
GO_INTRACELLULAR_ESTROGEN_RECEPTOR_SIGNALING_PATHWAY	GO_INTRACELLULAR_ESTROGEN_RECEPTOR_SIGNALING_PATHWAY		20	0.47446528	1.1276807	0.33333334	0.7232955	1.0	19321	tags=60%, list=36%, signal=93%
GO_CYSTEINE_TYPE_ENDOPEPTIDASE_REGULATOR_ACTIVITY_INVOLVED_IN_APOPTOTIC_PROCESS	GO_CYSTEINE_TYPE_ENDOPEPTIDASE_REGULATOR_ACTIVITY_INVOLVED_IN_APOPTOTIC_PROCESS		42	0.35694176	1.1276122	0.25686276	0.72236264	1.0	7862	tags=29%, list=14%, signal=33%
GO_PROTEIN_TRANSPORTER_ACTIVITY	GO_PROTEIN_TRANSPORTER_ACTIVITY		98	0.34716922	1.1274688	0.27911645	0.7217094	1.0	10786	tags=38%, list=20%, signal=47%
GO_HETEROCHROMATIN	GO_HETEROCHROMATIN		66	0.3918368	1.1270379	0.33528265	0.7219987	1.0	15168	tags=48%, list=28%, signal=67%
GO_NUCLEOSIDE_PHOSPHATE_CATABOLIC_PROCESS	GO_NUCLEOSIDE_PHOSPHATE_CATABOLIC_PROCESS		68	0.3446617	1.1269026	0.22813688	0.7213077	1.0	14025	tags=41%, list=26%, signal=55%
GO_NUCLEAR_BODY	GO_NUCLEAR_BODY		341	0.36094943	1.1266394	0.31445312	0.7210735	1.0	13643	tags=42%, list=25%, signal=55%
GO_CELLULAR_KETONE_METABOLIC_PROCESS	GO_CELLULAR_KETONE_METABOLIC_PROCESS		68	0.36496162	1.1265652	0.28599605	0.7201908	1.0	12820	tags=41%, list=24%, signal=54%
GO_NEGATIVE_REGULATION_OF_RESPONSE_TO_BIOTIC_STIMULUS	GO_NEGATIVE_REGULATION_OF_RESPONSE_TO_BIOTIC_STIMULUS		29	0.38371778	1.1254132	0.26086956	0.7229713	1.0	8795	tags=34%, list=16%, signal=41%
GO_REGULATION_OF_RESPONSE_TO_CYTOKINE_STIMULUS	GO_REGULATION_OF_RESPONSE_TO_CYTOKINE_STIMULUS		140	0.32255214	1.124915	0.22465208	0.7235692	1.0	8047	tags=23%, list=15%, signal=27%
GO_ANAPHASE_PROMOTING_COMPLEX	GO_ANAPHASE_PROMOTING_COMPLEX		20	0.44772935	1.1248006	0.33	0.7228191	1.0	19986	tags=70%, list=37%, signal=111%
GO_LIPOPROTEIN_BIOSYNTHETIC_PROCESS	GO_LIPOPROTEIN_BIOSYNTHETIC_PROCESS		83	0.33379143	1.1247393	0.23552124	0.7219141	1.0	10517	tags=31%, list=19%, signal=39%
GO_REGULATION_OF_RESPONSE_TO_DNA_DAMAGE_STIMULUS	GO_REGULATION_OF_RESPONSE_TO_DNA_DAMAGE_STIMULUS		140	0.34849858	1.1245492	0.27969348	0.7214244	1.0	9731	tags=33%, list=18%, signal=40%
GO_REGULATION_OF_MEMBRANE_LIPID_DISTRIBUTION	GO_REGULATION_OF_MEMBRANE_LIPID_DISTRIBUTION		36	0.37100014	1.1235766	0.2594697	0.7235766	1.0	8707	tags=31%, list=16%, signal=36%
GO_RIBONUCLEOSIDE_DIPHOSPHATE_METABOLIC_PROCESS	GO_RIBONUCLEOSIDE_DIPHOSPHATE_METABOLIC_PROCESS		61	0.34698638	1.1235259	0.2397541	0.72265637	1.0	8833	tags=30%, list=16%, signal=35%
GO_CELL_DIVISION_SITE	GO_CELL_DIVISION_SITE		48	0.36410704	1.1221349	0.2730845	0.7262741	1.0	13289	tags=46%, list=24%, signal=61%
GO_CELLULAR_RESPONSE_TO_HYDROGEN_PEROXIDE	GO_CELLULAR_RESPONSE_TO_HYDROGEN_PEROXIDE		60	0.33944634	1.12201	0.23938224	0.7256107	1.0	9201	tags=32%, list=17%, signal=38%
GO_CILIUM_ORGANIZATION	GO_CILIUM_ORGANIZATION		178	0.38922244	1.1205337	0.34714004	0.72952646	1.0	14564	tags=48%, list=27%, signal=65%
GO_CYTOSOLIC_TRANSPORT	GO_CYTOSOLIC_TRANSPORT		207	0.31013456	1.1202203	0.2338403	0.7294911	1.0	11032	tags=31%, list=20%, signal=39%
GO_POSITIVE_REGULATION_OF_RELEASE_OF_CYTOCHROME_C_FROM_MITOCHONDRIA	GO_POSITIVE_REGULATION_OF_RELEASE_OF_CYTOCHROME_C_FROM_MITOCHONDRIA		27	0.3844762	1.1199044	0.26824456	0.7294341	1.0	12032	tags=44%, list=22%, signal=57%
GO_DNA_DOUBLE_STRAND_BREAK_PROCESSING	GO_DNA_DOUBLE_STRAND_BREAK_PROCESSING		20	0.4783624	1.1185544	0.3403042	0.73298043	1.0	16945	tags=75%, list=31%, signal=109%
GO_NEGATIVE_REGULATION_OF_NF_KAPPAB_TRANSCRIPTION_FACTOR_ACTIVITY	GO_NEGATIVE_REGULATION_OF_NF_KAPPAB_TRANSCRIPTION_FACTOR_ACTIVITY		65	0.3296354	1.11844	0.20194174	0.7322903	1.0	10286	tags=34%, list=19%, signal=42%
GO_PEPTIDE_N_ACETYLTRANSFERASE_ACTIVITY	GO_PEPTIDE_N_ACETYLTRANSFERASE_ACTIVITY		62	0.3948105	1.11797	0.33596838	0.7327505	1.0	12343	tags=35%, list=23%, signal=46%
GO_CHROMOSOME_CENTROMERIC_REGION	GO_CHROMOSOME_CENTROMERIC_REGION		165	0.4009043	1.1177678	0.3493976	0.7323125	1.0	15358	tags=50%, list=28%, signal=70%
GO_DNA_REPLICATION_INITIATION	GO_DNA_REPLICATION_INITIATION		29	0.50697964	1.1174657	0.37351778	0.73223555	1.0	6441	tags=28%, list=12%, signal=31%
GO_REGULATION_OF_DNA_REPLICATION	GO_REGULATION_OF_DNA_REPLICATION		158	0.34462208	1.1172597	0.3053435	0.7318088	1.0	15819	tags=46%, list=29%, signal=65%
GO_PROTEIN_METHYLTRANSFERASE_ACTIVITY	GO_PROTEIN_METHYLTRANSFERASE_ACTIVITY		75	0.38777855	1.1171466	0.31736526	0.7310515	1.0	7892	tags=35%, list=15%, signal=41%
GO_EXECUTION_PHASE_OF_APOPTOSIS	GO_EXECUTION_PHASE_OF_APOPTOSIS		54	0.36424625	1.1169951	0.2653846	0.7304464	1.0	15488	tags=52%, list=29%, signal=72%
GO_PROTEIN_MANNOSYLATION	GO_PROTEIN_MANNOSYLATION		21	0.40446112	1.1162443	0.295858	0.7318979	1.0	4030	tags=24%, list=7%, signal=26%
GO_REGULATION_OF_DNA_METABOLIC_PROCESS	GO_REGULATION_OF_DNA_METABOLIC_PROCESS		331	0.33238158	1.1160821	0.27360308	0.7313683	1.0	12198	tags=35%, list=22%, signal=45%
GO_MITOTIC_SISTER_CHROMATID_SEGREGATION	GO_MITOTIC_SISTER_CHROMATID_SEGREGATION		88	0.41587618	1.1143608	0.34016395	0.73607254	1.0	11017	tags=35%, list=20%, signal=44%
GO_CILIUM_MOVEMENT	GO_CILIUM_MOVEMENT		35	0.45516172	1.1134571	0.35586482	0.7380846	1.0	13323	tags=49%, list=25%, signal=64%
GO_REGULATION_OF_TRANSCRIPTION_FROM_RNA_POLYMERASE_III_PROMOTER	GO_REGULATION_OF_TRANSCRIPTION_FROM_RNA_POLYMERASE_III_PROMOTER		22	0.44299996	1.113184	0.34672305	0.73793024	1.0	10386	tags=45%, list=19%, signal=56%
GO_ASPARTATE_FAMILY_AMINO_ACID_METABOLIC_PROCESS	GO_ASPARTATE_FAMILY_AMINO_ACID_METABOLIC_PROCESS		53	0.3710661	1.1129224	0.30392158	0.7376498	1.0	15016	tags=47%, list=28%, signal=65%
GO_CELL_CYCLE_PHASE_TRANSITION	GO_CELL_CYCLE_PHASE_TRANSITION		252	0.3578349	1.1122957	0.3238289	0.7386336	1.0	12503	tags=38%, list=23%, signal=49%
GO_INO80_TYPE_COMPLEX	GO_INO80_TYPE_COMPLEX		21	0.46219882	1.1102477	0.37425742	0.74449044	1.0	8236	tags=38%, list=15%, signal=45%
GO_REGULATION_OF_CELLULAR_RESPONSE_TO_HEAT	GO_REGULATION_OF_CELLULAR_RESPONSE_TO_HEAT		74	0.4072187	1.1101745	0.34942085	0.7436196	1.0	14169	tags=49%, list=26%, signal=66%
GO_NEGATIVE_REGULATION_OF_PROTEIN_TYROSINE_KINASE_ACTIVITY	GO_NEGATIVE_REGULATION_OF_PROTEIN_TYROSINE_KINASE_ACTIVITY		20	0.41683346	1.1097	0.3220339	0.74416435	1.0	13907	tags=60%, list=26%, signal=81%
GO_PROTEIN_C_TERMINUS_BINDING	GO_PROTEIN_C_TERMINUS_BINDING		185	0.3240368	1.1087449	0.27272728	0.7462704	1.0	6520	tags=23%, list=12%, signal=26%
GO_TRANSFERASE_ACTIVITY_TRANSFERRING_NITROGENOUS_GROUPS	GO_TRANSFERASE_ACTIVITY_TRANSFERRING_NITROGENOUS_GROUPS		21	0.461007	1.1082191	0.3550864	0.746901	1.0	15339	tags=43%, list=28%, signal=60%
GO_RESPONSE_TO_SALT_STRESS	GO_RESPONSE_TO_SALT_STRESS		19	0.40744907	1.1081651	0.2732342	0.7459619	1.0	12572	tags=53%, list=23%, signal=68%
GO_POSITIVE_REGULATION_OF_T_HELPER_1_TYPE_IMMUNE_RESPONSE	GO_POSITIVE_REGULATION_OF_T_HELPER_1_TYPE_IMMUNE_RESPONSE		15	0.41636226	1.1079674	0.28849903	0.745534	1.0	6107	tags=27%, list=11%, signal=30%
GO_RNA_LOCALIZATION	GO_RNA_LOCALIZATION		179	0.39479747	1.1078498	0.36758894	0.7448488	1.0	13669	tags=42%, list=25%, signal=56%
GO_REGULATION_OF_PROTEIN_IMPORT_INTO_NUCLEUS_TRANSLOCATION	GO_REGULATION_OF_PROTEIN_IMPORT_INTO_NUCLEUS_TRANSLOCATION		21	0.43878275	1.1064422	0.32921812	0.7484461	1.0	11418	tags=43%, list=21%, signal=54%
GO_NEURON_CELL_CELL_ADHESION	GO_NEURON_CELL_CELL_ADHESION		16	0.4516014	1.1062537	0.31688803	0.74798554	1.0	7488	tags=38%, list=14%, signal=43%
GO_ESTROGEN_METABOLIC_PROCESS	GO_ESTROGEN_METABOLIC_PROCESS		23	0.42442805	1.1061423	0.31098697	0.74730766	1.0	4914	tags=22%, list=9%, signal=24%
GO_NEGATIVE_REGULATION_OF_CELL_JUNCTION_ASSEMBLY	GO_NEGATIVE_REGULATION_OF_CELL_JUNCTION_ASSEMBLY		19	0.40710533	1.1055799	0.29206964	0.7481549	1.0	13838	tags=58%, list=25%, signal=78%
GO_REGULATION_OF_RESPONSE_TO_BIOTIC_STIMULUS	GO_REGULATION_OF_RESPONSE_TO_BIOTIC_STIMULUS		231	0.2987384	1.105422	0.22370937	0.7475965	1.0	11748	tags=34%, list=22%, signal=43%
GO_REGULATION_OF_PROTEASOMAL_PROTEIN_CATABOLIC_PROCESS	GO_REGULATION_OF_PROTEASOMAL_PROTEIN_CATABOLIC_PROCESS		177	0.32096463	1.1052523	0.28742516	0.7470705	1.0	14202	tags=44%, list=26%, signal=59%
GO_REGULATION_OF_ALTERNATIVE_MRNA_SPLICING_VIA_SPLICEOSOME	GO_REGULATION_OF_ALTERNATIVE_MRNA_SPLICING_VIA_SPLICEOSOME		35	0.42181045	1.1050253	0.33398822	0.74674547	1.0	16452	tags=60%, list=30%, signal=86%
GO_SISTER_CHROMATID_COHESION	GO_SISTER_CHROMATID_COHESION		108	0.42177913	1.104992	0.37575758	0.7457525	1.0	15358	tags=53%, list=28%, signal=73%
GO_COVALENT_CHROMATIN_MODIFICATION	GO_COVALENT_CHROMATIN_MODIFICATION		333	0.353802	1.104027	0.3365949	0.74781364	1.0	15231	tags=45%, list=28%, signal=62%
GO_GOLGI_TO_ENDOSOME_TRANSPORT	GO_GOLGI_TO_ENDOSOME_TRANSPORT		19	0.41694942	1.1033841	0.33401638	0.7488992	1.0	9388	tags=42%, list=17%, signal=51%
GO_CONDENSED_CHROMOSOME	GO_CONDENSED_CHROMOSOME		186	0.3843533	1.1028697	0.3510848	0.7496161	1.0	13514	tags=46%, list=25%, signal=61%
GO_REGULATION_OF_RESPONSE_TO_EXTRACELLULAR_STIMULUS	GO_REGULATION_OF_RESPONSE_TO_EXTRACELLULAR_STIMULUS		171	0.32011667	1.1025621	0.27470356	0.74960625	1.0	9988	tags=30%, list=18%, signal=36%
GO_REGULATION_OF_CHROMOSOME_ORGANIZATION	GO_REGULATION_OF_CHROMOSOME_ORGANIZATION		272	0.3524943	1.1022459	0.32485324	0.74968046	1.0	12907	tags=38%, list=24%, signal=49%
GO_SISTER_CHROMATID_SEGREGATION	GO_SISTER_CHROMATID_SEGREGATION		171	0.4046835	1.1021591	0.35902637	0.7489091	1.0	15488	tags=49%, list=29%, signal=68%
GO_MITOCHONDRIAL_GENOME_MAINTENANCE	GO_MITOCHONDRIAL_GENOME_MAINTENANCE		21	0.43671504	1.1021223	0.3515625	0.74795365	1.0	9713	tags=33%, list=18%, signal=41%
GO_REGULATION_OF_SIGNAL_TRANSDUCTION_BY_P53_CLASS_MEDIATOR	GO_REGULATION_OF_SIGNAL_TRANSDUCTION_BY_P53_CLASS_MEDIATOR		159	0.34020746	1.1018414	0.31384015	0.7478505	1.0	12458	tags=38%, list=23%, signal=49%
GO_NEGATIVE_REGULATION_OF_RESPONSE_TO_REACTIVE_OXYGEN_SPECIES	GO_NEGATIVE_REGULATION_OF_RESPONSE_TO_REACTIVE_OXYGEN_SPECIES		18	0.40915015	1.1011914	0.29182878	0.749003	1.0	14039	tags=61%, list=26%, signal=82%
GO_NUCLEAR_TRANSCRIBED_MRNA_CATABOLIC_PROCESS_DEADENYLATION_DEPENDENT_DECAY	GO_NUCLEAR_TRANSCRIBED_MRNA_CATABOLIC_PROCESS_DEADENYLATION_DEPENDENT_DECAY		55	0.42274225	1.1009959	0.38235295	0.7486183	1.0	10902	tags=42%, list=20%, signal=52%
GO_OXIDOREDUCTASE_ACTIVITY_ACTING_ON_A_HEME_GROUP_OF_DONORS	GO_OXIDOREDUCTASE_ACTIVITY_ACTING_ON_A_HEME_GROUP_OF_DONORS		25	0.42614213	1.1004554	0.34150943	0.7493827	1.0	6452	tags=28%, list=12%, signal=32%
GO_RAC_PROTEIN_SIGNAL_TRANSDUCTION	GO_RAC_PROTEIN_SIGNAL_TRANSDUCTION		19	0.38634259	1.0999423	0.33461538	0.7501341	1.0	15818	tags=53%, list=29%, signal=74%
GO_MITOTIC_NUCLEAR_DIVISION	GO_MITOTIC_NUCLEAR_DIVISION		348	0.36087927	1.0995146	0.34331337	0.75048804	1.0	15416	tags=45%, list=28%, signal=62%
GO_REGULATION_OF_MRNA_METABOLIC_PROCESS	GO_REGULATION_OF_MRNA_METABOLIC_PROCESS		116	0.3916619	1.0993246	0.3616601	0.75005645	1.0	10374	tags=35%, list=19%, signal=44%
GO_PROTEIN_LOCALIZATION_TO_SYNAPSE	GO_PROTEIN_LOCALIZATION_TO_SYNAPSE		15	0.4933063	1.0982155	0.34593573	0.752846	1.0	7969	tags=40%, list=15%, signal=47%
GO_ACROSOME_REACTION	GO_ACROSOME_REACTION		16	0.4113034	1.097699	0.3030888	0.7535449	1.0	12207	tags=50%, list=22%, signal=64%
GO_MITOCHONDRIAL_RESPIRATORY_CHAIN_COMPLEX_I_BIOGENESIS	GO_MITOCHONDRIAL_RESPIRATORY_CHAIN_COMPLEX_I_BIOGENESIS		51	0.420238	1.0968227	0.36659878	0.75552994	1.0	10143	tags=39%, list=19%, signal=48%
GO_REGULATION_OF_CELL_CYCLE_G2_M_PHASE_TRANSITION	GO_REGULATION_OF_CELL_CYCLE_G2_M_PHASE_TRANSITION		58	0.37628952	1.0967889	0.32170543	0.75457066	1.0	10847	tags=40%, list=20%, signal=50%
GO_POLYOL_METABOLIC_PROCESS	GO_POLYOL_METABOLIC_PROCESS		94	0.3567656	1.0961303	0.31300813	0.75577426	1.0	10582	tags=33%, list=19%, signal=41%
GO_HISTONE_BINDING	GO_HISTONE_BINDING		172	0.3716732	1.09607	0.35686275	0.75490695	1.0	14275	tags=40%, list=26%, signal=54%
GO_FEMALE_MEIOTIC_DIVISION	GO_FEMALE_MEIOTIC_DIVISION		24	0.40239984	1.0960143	0.34599155	0.75401944	1.0	16677	tags=54%, list=31%, signal=78%
GO_OLIGODENDROCYTE_DEVELOPMENT	GO_OLIGODENDROCYTE_DEVELOPMENT		32	0.36029693	1.0948406	0.29562044	0.7570223	1.0	11710	tags=34%, list=22%, signal=44%
GO_POSITIVE_REGULATION_OF_EPIDERMAL_CELL_DIFFERENTIATION	GO_POSITIVE_REGULATION_OF_EPIDERMAL_CELL_DIFFERENTIATION		19	0.45020425	1.0942675	0.35236222	0.7578681	1.0	14151	tags=53%, list=26%, signal=71%
GO_PROTEIN_SERINE_THREONINE_PHOSPHATASE_ACTIVITY	GO_PROTEIN_SERINE_THREONINE_PHOSPHATASE_ACTIVITY		63	0.35193107	1.094028	0.31212723	0.75760293	1.0	10187	tags=35%, list=19%, signal=43%
GO_REGULATION_OF_CYCLIN_DEPENDENT_PROTEIN_KINASE_ACTIVITY	GO_REGULATION_OF_CYCLIN_DEPENDENT_PROTEIN_KINASE_ACTIVITY		95	0.29317877	1.0927466	0.25198412	0.7608929	1.0	8019	tags=25%, list=15%, signal=30%
GO_DNA_BINDING_BENDING	GO_DNA_BINDING_BENDING		20	0.42211753	1.092727	0.31021196	0.75988835	1.0	16976	tags=65%, list=31%, signal=95%
GO_N_ACETYLGLUCOSAMINE_METABOLIC_PROCESS	GO_N_ACETYLGLUCOSAMINE_METABOLIC_PROCESS		16	0.44114885	1.0926657	0.36565655	0.75902194	1.0	2222	tags=25%, list=4%, signal=26%
GO_HORMONE_RECEPTOR_BINDING	GO_HORMONE_RECEPTOR_BINDING		167	0.31893346	1.0921662	0.28326997	0.75959885	1.0	11662	tags=34%, list=21%, signal=43%
GO_REGULATION_OF_SEQUENCE_SPECIFIC_DNA_BINDING_TRANSCRIPTION_FACTOR_ACTIVITY	GO_REGULATION_OF_SEQUENCE_SPECIFIC_DNA_BINDING_TRANSCRIPTION_FACTOR_ACTIVITY		358	0.2827332	1.0921079	0.21731123	0.7587361	1.0	12562	tags=32%, list=23%, signal=41%
GO_TUMOR_NECROSIS_FACTOR_RECEPTOR_SUPERFAMILY_BINDING	GO_TUMOR_NECROSIS_FACTOR_RECEPTOR_SUPERFAMILY_BINDING		47	0.37205017	1.0919528	0.29783037	0.75820994	1.0	16548	tags=57%, list=30%, signal=83%
GO_NUCLEOBASE_CONTAINING_COMPOUND_TRANSPORT	GO_NUCLEOBASE_CONTAINING_COMPOUND_TRANSPORT		193	0.37631837	1.0915775	0.36633664	0.75838673	1.0	13483	tags=40%, list=25%, signal=54%
GO_NAD_ADP_RIBOSYLTRANSFERASE_ACTIVITY	GO_NAD_ADP_RIBOSYLTRANSFERASE_ACTIVITY		26	0.4320676	1.0912082	0.38235295	0.75854355	1.0	10695	tags=46%, list=20%, signal=57%
GO_POSTSYNAPTIC_MEMBRANE_ORGANIZATION	GO_POSTSYNAPTIC_MEMBRANE_ORGANIZATION		25	0.39784458	1.0911618	0.3445693	0.75762147	1.0	13726	tags=56%, list=25%, signal=75%
GO_CELLULAR_RESPONSE_TO_INTERLEUKIN_4	GO_CELLULAR_RESPONSE_TO_INTERLEUKIN_4		25	0.4140699	1.0908711	0.33846155	0.75752723	1.0	17026	tags=52%, list=31%, signal=76%
GO_PROTEIN_LOCALIZATION_TO_NUCLEUS	GO_PROTEIN_LOCALIZATION_TO_NUCLEUS		154	0.31786087	1.090271	0.30544746	0.758461	1.0	11056	tags=37%, list=20%, signal=46%
GO_REGULATION_OF_CELL_AGING	GO_REGULATION_OF_CELL_AGING		32	0.39549595	1.0898552	0.33532935	0.7587799	1.0	15923	tags=66%, list=29%, signal=93%
GO_RESPONSE_TO_COLD	GO_RESPONSE_TO_COLD		42	0.3597585	1.0886624	0.3116883	0.76188755	1.0	9123	tags=31%, list=17%, signal=37%
GO_STRUCTURE_SPECIFIC_DNA_BINDING	GO_STRUCTURE_SPECIFIC_DNA_BINDING		118	0.35731712	1.088226	0.33003953	0.7622896	1.0	15435	tags=49%, list=28%, signal=69%
GO_DNA_CONFORMATION_CHANGE	GO_DNA_CONFORMATION_CHANGE		269	0.36759922	1.0874562	0.3493724	0.76391774	1.0	13465	tags=38%, list=25%, signal=50%
GO_POLYSOME	GO_POLYSOME		40	0.3537448	1.0864514	0.33267716	0.76622975	1.0	11623	tags=45%, list=21%, signal=57%
GO_OXIDOREDUCTASE_ACTIVITY_ACTING_ON_THE_CH_NH_GROUP_OF_DONORS_NAD_OR_NADP_AS_ACCEPTOR	GO_OXIDOREDUCTASE_ACTIVITY_ACTING_ON_THE_CH_NH_GROUP_OF_DONORS_NAD_OR_NADP_AS_ACCEPTOR		19	0.43184984	1.0858319	0.35140562	0.7672502	1.0	16124	tags=47%, list=30%, signal=67%
GO_CILIUM_MORPHOGENESIS	GO_CILIUM_MORPHOGENESIS		194	0.37108523	1.0851836	0.37911025	0.7684404	1.0	15058	tags=48%, list=28%, signal=66%
GO_ATP_DEPENDENT_CHROMATIN_REMODELING	GO_ATP_DEPENDENT_CHROMATIN_REMODELING		73	0.40013874	1.0845371	0.38709676	0.7695934	1.0	12542	tags=44%, list=23%, signal=57%
GO_OOCYTE_MATURATION	GO_OOCYTE_MATURATION		18	0.40601662	1.0840583	0.3243243	0.7701235	1.0	10687	tags=39%, list=20%, signal=48%
GO_ASPARTATE_FAMILY_AMINO_ACID_CATABOLIC_PROCESS	GO_ASPARTATE_FAMILY_AMINO_ACID_CATABOLIC_PROCESS		17	0.46911046	1.0830708	0.38076153	0.7724251	1.0	14790	tags=47%, list=27%, signal=65%
GO_RESPONSE_TO_EPIDERMAL_GROWTH_FACTOR	GO_RESPONSE_TO_EPIDERMAL_GROWTH_FACTOR		29	0.3558379	1.0826441	0.28867924	0.77289337	1.0	14169	tags=48%, list=26%, signal=65%
GO_OXIDOREDUCTASE_ACTIVITY_ACTING_ON_NAD_P_H_QUINONE_OR_SIMILAR_COMPOUND_AS_ACCEPTOR	GO_OXIDOREDUCTASE_ACTIVITY_ACTING_ON_NAD_P_H_QUINONE_OR_SIMILAR_COMPOUND_AS_ACCEPTOR		51	0.39663517	1.0825697	0.35845214	0.77206373	1.0	4352	tags=25%, list=8%, signal=28%
GO_OXIDOREDUCTASE_ACTIVITY_ACTING_ON_NAD_P_H	GO_OXIDOREDUCTASE_ACTIVITY_ACTING_ON_NAD_P_H		92	0.3512597	1.0825558	0.32156864	0.7710479	1.0	6778	tags=27%, list=12%, signal=31%
GO_PORE_COMPLEX	GO_PORE_COMPLEX		17	0.44002295	1.0809212	0.34577602	0.77554184	1.0	9869	tags=41%, list=18%, signal=50%
GO_CILIARY_TRANSITION_ZONE	GO_CILIARY_TRANSITION_ZONE		23	0.46430314	1.0808412	0.39328063	0.7747431	1.0	10317	tags=39%, list=19%, signal=48%
GO_PROTEIN_SUMOYLATION	GO_PROTEIN_SUMOYLATION		114	0.38145876	1.0807761	0.39803922	0.7739221	1.0	15488	tags=45%, list=29%, signal=62%
GO_BLASTOCYST_DEVELOPMENT	GO_BLASTOCYST_DEVELOPMENT		62	0.35675406	1.0793988	0.35645473	0.7776314	1.0	10591	tags=35%, list=20%, signal=44%
GO_ORGANELLE_FISSION	GO_ORGANELLE_FISSION		473	0.33521134	1.078979	0.35049504	0.7780274	1.0	15416	tags=44%, list=28%, signal=61%
GO_NEGATIVE_REGULATION_OF_RELEASE_OF_CYTOCHROME_C_FROM_MITOCHONDRIA	GO_NEGATIVE_REGULATION_OF_RELEASE_OF_CYTOCHROME_C_FROM_MITOCHONDRIA		17	0.40388343	1.0788897	0.35984096	0.7772665	1.0	11970	tags=47%, list=22%, signal=60%
GO_PHOSPHATIDYLINOSITOL_DEPHOSPHORYLATION	GO_PHOSPHATIDYLINOSITOL_DEPHOSPHORYLATION		23	0.41118982	1.0788419	0.36713997	0.7763948	1.0	7345	tags=35%, list=14%, signal=40%
GO_MACROPHAGE_DIFFERENTIATION	GO_MACROPHAGE_DIFFERENTIATION		19	0.39126277	1.0785947	0.3220676	0.7761802	1.0	6937	tags=32%, list=13%, signal=36%
GO_NEGATIVE_REGULATION_OF_RECEPTOR_MEDIATED_ENDOCYTOSIS	GO_NEGATIVE_REGULATION_OF_RECEPTOR_MEDIATED_ENDOCYTOSIS		17	0.3750986	1.0785695	0.3212237	0.7751958	1.0	13612	tags=47%, list=25%, signal=63%
GO_NEGATIVE_REGULATION_OF_VIRAL_PROCESS	GO_NEGATIVE_REGULATION_OF_VIRAL_PROCESS		88	0.4036861	1.078522	0.3611111	0.7742952	1.0	10950	tags=38%, list=20%, signal=47%
GO_NEGATIVE_REGULATION_OF_MITOTIC_NUCLEAR_DIVISION	GO_NEGATIVE_REGULATION_OF_MITOTIC_NUCLEAR_DIVISION		33	0.41266984	1.0780952	0.35420743	0.7747305	1.0	12907	tags=45%, list=24%, signal=60%
GO_POSITIVE_REGULATION_OF_SMOOTHENED_SIGNALING_PATHWAY	GO_POSITIVE_REGULATION_OF_SMOOTHENED_SIGNALING_PATHWAY		24	0.39834622	1.0777513	0.3390476	0.7748023	1.0	6916	tags=29%, list=13%, signal=33%
GO_CILIARY_BASAL_BODY	GO_CILIARY_BASAL_BODY		78	0.37732565	1.0771027	0.35613683	0.77595854	1.0	15096	tags=45%, list=28%, signal=62%
GO_NEGATIVE_REGULATION_OF_VIRAL_ENTRY_INTO_HOST_CELL	GO_NEGATIVE_REGULATION_OF_VIRAL_ENTRY_INTO_HOST_CELL		19	0.40018407	1.0762297	0.33465347	0.77787185	1.0	5905	tags=21%, list=11%, signal=24%
GO_CYSTEINE_TYPE_PEPTIDASE_ACTIVITY	GO_CYSTEINE_TYPE_PEPTIDASE_ACTIVITY		167	0.29486993	1.074786	0.25736737	0.78170776	1.0	15150	tags=42%, list=28%, signal=58%
GO_TBP_CLASS_PROTEIN_BINDING	GO_TBP_CLASS_PROTEIN_BINDING		19	0.4570317	1.0731517	0.38821137	0.78628415	1.0	3157	tags=21%, list=6%, signal=22%
GO_PEPTIDYL_LYSINE_MODIFICATION	GO_PEPTIDYL_LYSINE_MODIFICATION		299	0.35527486	1.0722493	0.398	0.7883108	1.0	12343	tags=35%, list=23%, signal=45%
GO_MICROBODY_MEMBRANE	GO_MICROBODY_MEMBRANE		58	0.36032996	1.0720754	0.35559922	0.7878546	1.0	13664	tags=41%, list=25%, signal=55%
GO_CELLULAR_RESPONSE_TO_GAMMA_RADIATION	GO_CELLULAR_RESPONSE_TO_GAMMA_RADIATION		19	0.4262045	1.0712124	0.3868472	0.789753	1.0	5099	tags=21%, list=9%, signal=23%
GO_MACROMOLECULE_TRANSMEMBRANE_TRANSPORTER_ACTIVITY	GO_MACROMOLECULE_TRANSMEMBRANE_TRANSPORTER_ACTIVITY		21	0.41512427	1.071059	0.3600823	0.7892309	1.0	16420	tags=52%, list=30%, signal=75%
GO_MANNOSYLATION	GO_MANNOSYLATION		33	0.3644484	1.0707579	0.3306288	0.7892301	1.0	10924	tags=36%, list=20%, signal=46%
GO_O_METHYLTRANSFERASE_ACTIVITY	GO_O_METHYLTRANSFERASE_ACTIVITY		17	0.41383955	1.0703309	0.3554217	0.78968716	1.0	6522	tags=29%, list=12%, signal=33%
GO_REGULATION_OF_CHROMATIN_SILENCING	GO_REGULATION_OF_CHROMATIN_SILENCING		21	0.41736767	1.0696907	0.36489153	0.7907696	1.0	16312	tags=38%, list=30%, signal=54%
GO_OOGENESIS	GO_OOGENESIS		63	0.31210056	1.0693572	0.28651685	0.790898	1.0	11170	tags=30%, list=21%, signal=38%
GO_PROTEIN_COMPLEX_LOCALIZATION	GO_PROTEIN_COMPLEX_LOCALIZATION		52	0.36783063	1.0692871	0.3608871	0.7900804	1.0	15014	tags=48%, list=28%, signal=66%
GO_PROTEIN_DNA_COMPLEX_SUBUNIT_ORGANIZATION	GO_PROTEIN_DNA_COMPLEX_SUBUNIT_ORGANIZATION		228	0.35494217	1.0686654	0.36983472	0.79118913	1.0	12612	tags=38%, list=23%, signal=50%
GO_CORE_PROMOTER_BINDING	GO_CORE_PROMOTER_BINDING		149	0.32371876	1.0683956	0.34824902	0.79108095	1.0	16639	tags=49%, list=31%, signal=70%
GO_INOSITOL_PHOSPHATE_METABOLIC_PROCESS	GO_INOSITOL_PHOSPHATE_METABOLIC_PROCESS		56	0.36940262	1.068096	0.32505175	0.7910884	1.0	9957	tags=32%, list=18%, signal=39%
GO_U2_SNRNP	GO_U2_SNRNP		19	0.46968928	1.0674822	0.39156628	0.79211324	1.0	17329	tags=58%, list=32%, signal=85%
GO_MITOCHONDRIAL_MEMBRANE_ORGANIZATION	GO_MITOCHONDRIAL_MEMBRANE_ORGANIZATION		91	0.31817886	1.0671319	0.34567901	0.79221755	1.0	11380	tags=30%, list=21%, signal=37%
GO_ISOMERASE_ACTIVITY	GO_ISOMERASE_ACTIVITY		155	0.28823814	1.0671316	0.294347	0.7911779	1.0	14381	tags=38%, list=26%, signal=52%
GO_MULTIVESICULAR_BODY_ORGANIZATION	GO_MULTIVESICULAR_BODY_ORGANIZATION		30	0.38900095	1.066965	0.3891129	0.7906769	1.0	17779	tags=57%, list=33%, signal=84%
GO_DNA_DAMAGE_RESPONSE_DETECTION_OF_DNA_DAMAGE	GO_DNA_DAMAGE_RESPONSE_DETECTION_OF_DNA_DAMAGE		36	0.40515333	1.0665636	0.41025642	0.7910299	1.0	16517	tags=53%, list=30%, signal=76%
GO_REGULATION_OF_CYSTEINE_TYPE_ENDOPEPTIDASE_ACTIVITY_INVOLVED_IN_APOPTOTIC_SIGNALING_PATHWAY	GO_REGULATION_OF_CYSTEINE_TYPE_ENDOPEPTIDASE_ACTIVITY_INVOLVED_IN_APOPTOTIC_SIGNALING_PATHWAY		22	0.42102212	1.0664811	0.36969697	0.79026926	1.0	10892	tags=45%, list=20%, signal=57%
GO_CILIARY_PLASM	GO_CILIARY_PLASM		77	0.37307778	1.066327	0.39	0.7897424	1.0	13323	tags=42%, list=25%, signal=55%
GO_REGULATION_OF_CHROMOSOME_SEGREGATION	GO_REGULATION_OF_CHROMOSOME_SEGREGATION		83	0.39480028	1.0660398	0.3805668	0.789735	1.0	13524	tags=46%, list=25%, signal=61%
GO_CARBON_OXYGEN_LYASE_ACTIVITY	GO_CARBON_OXYGEN_LYASE_ACTIVITY		69	0.33005065	1.0657574	0.3280943	0.78964716	1.0	10388	tags=36%, list=19%, signal=45%
GO_PERICENTRIOLAR_MATERIAL	GO_PERICENTRIOLAR_MATERIAL		18	0.456395	1.0654777	0.39078155	0.7895445	1.0	17943	tags=72%, list=33%, signal=108%
GO_LIPID_TRANSLOCATION	GO_LIPID_TRANSLOCATION		21	0.36908183	1.0642972	0.3256705	0.79247767	1.0	7492	tags=29%, list=14%, signal=33%
GO_CYTOPLASMIC_STRESS_GRANULE	GO_CYTOPLASMIC_STRESS_GRANULE		31	0.41793177	1.0640838	0.40808082	0.79215264	1.0	13877	tags=52%, list=26%, signal=69%
GO_NUCLEOTIDE_BINDING_DOMAIN_LEUCINE_RICH_REPEAT_CONTAINING_RECEPTOR_SIGNALING_PATHWAY	GO_NUCLEOTIDE_BINDING_DOMAIN_LEUCINE_RICH_REPEAT_CONTAINING_RECEPTOR_SIGNALING_PATHWAY		28	0.37223792	1.0640143	0.35338345	0.7913656	1.0	11734	tags=32%, list=22%, signal=41%
GO_TETRAHYDROFOLATE_METABOLIC_PROCESS	GO_TETRAHYDROFOLATE_METABOLIC_PROCESS		21	0.44487783	1.0638313	0.39726028	0.79094857	1.0	14840	tags=57%, list=27%, signal=79%
GO_RIBONUCLEOSIDE_CATABOLIC_PROCESS	GO_RIBONUCLEOSIDE_CATABOLIC_PROCESS		25	0.42382318	1.0636005	0.37109375	0.79070747	1.0	12851	tags=40%, list=24%, signal=52%
GO_NEGATIVE_REGULATION_OF_OXIDOREDUCTASE_ACTIVITY	GO_NEGATIVE_REGULATION_OF_OXIDOREDUCTASE_ACTIVITY		26	0.3735265	1.0631207	0.32177263	0.7912548	1.0	10143	tags=35%, list=19%, signal=43%
GO_NUCLEAR_TRANSPORT	GO_NUCLEAR_TRANSPORT		350	0.30663952	1.0627785	0.37692308	0.79130614	1.0	13483	tags=38%, list=25%, signal=50%
GO_DICARBOXYLIC_ACID_TRANSMEMBRANE_TRANSPORTER_ACTIVITY	GO_DICARBOXYLIC_ACID_TRANSMEMBRANE_TRANSPORTER_ACTIVITY		33	0.38075864	1.0626379	0.3426295	0.79074824	1.0	9867	tags=39%, list=18%, signal=48%
GO_REGULATION_OF_SISTER_CHROMATID_COHESION	GO_REGULATION_OF_SISTER_CHROMATID_COHESION		17	0.45628884	1.0611342	0.39607844	0.7949034	1.0	15324	tags=47%, list=28%, signal=66%
GO_REGULATION_OF_SISTER_CHROMATID_SEGREGATION	GO_REGULATION_OF_SISTER_CHROMATID_SEGREGATION		66	0.3981185	1.061044	0.3910387	0.7941801	1.0	13476	tags=45%, list=25%, signal=60%
GO_POSITIVE_REGULATION_OF_CHROMOSOME_SEGREGATION	GO_POSITIVE_REGULATION_OF_CHROMOSOME_SEGREGATION		25	0.41399407	1.0606184	0.38163266	0.7945748	1.0	13476	tags=48%, list=25%, signal=64%
GO_OXIDOREDUCTASE_COMPLEX	GO_OXIDOREDUCTASE_COMPLEX		93	0.35994527	1.0605036	0.37627813	0.793933	1.0	14042	tags=44%, list=26%, signal=59%
GO_POSITIVE_REGULATION_OF_CHROMATIN_MODIFICATION	GO_POSITIVE_REGULATION_OF_CHROMATIN_MODIFICATION		82	0.33928645	1.0603588	0.3627639	0.7933901	1.0	10351	tags=33%, list=19%, signal=41%
GO_PROTEIN_IMPORT	GO_PROTEIN_IMPORT		153	0.31905437	1.0603008	0.35440612	0.7925715	1.0	11056	tags=35%, list=20%, signal=43%
GO_CARBOHYDRATE_PHOSPHORYLATION	GO_CARBOHYDRATE_PHOSPHORYLATION		21	0.39880735	1.0601544	0.38617885	0.792013	1.0	6546	tags=29%, list=12%, signal=32%
GO_NEGATIVE_REGULATION_OF_CATABOLIC_PROCESS	GO_NEGATIVE_REGULATION_OF_CATABOLIC_PROCESS		200	0.29307485	1.0599194	0.3249027	0.791786	1.0	12023	tags=33%, list=22%, signal=42%
GO_SPERM_CAPACITATION	GO_SPERM_CAPACITATION		16	0.44131786	1.0595928	0.39250493	0.7918993	1.0	14356	tags=56%, list=26%, signal=76%
GO_TRANSCRIPTIONAL_ACTIVATOR_ACTIVITY_RNA_POLYMERASE_II_DISTAL_ENHANCER_SEQUENCE_SPECIFIC_BINDING	GO_TRANSCRIPTIONAL_ACTIVATOR_ACTIVITY_RNA_POLYMERASE_II_DISTAL_ENHANCER_SEQUENCE_SPECIFIC_BINDING		26	0.41659185	1.0590532	0.36174244	0.7926393	1.0	9725	tags=38%, list=18%, signal=47%
GO_I_KAPPAB_KINASE_NF_KAPPAB_SIGNALING	GO_I_KAPPAB_KINASE_NF_KAPPAB_SIGNALING		70	0.34416875	1.058785	0.36750484	0.7925388	1.0	12500	tags=36%, list=23%, signal=46%
GO_RESPONSE_TO_X_RAY	GO_RESPONSE_TO_X_RAY		30	0.38334724	1.0575333	0.3808554	0.795779	1.0	12148	tags=47%, list=22%, signal=60%
GO_2_OXOGLUTARATE_METABOLIC_PROCESS	GO_2_OXOGLUTARATE_METABOLIC_PROCESS		20	0.4419582	1.0570815	0.41050583	0.79623735	1.0	13248	tags=60%, list=24%, signal=79%
GO_HYDROLASE_ACTIVITY_HYDROLYZING_N_GLYCOSYL_COMPOUNDS	GO_HYDROLASE_ACTIVITY_HYDROLYZING_N_GLYCOSYL_COMPOUNDS		22	0.3773212	1.0568413	0.3463035	0.7960364	1.0	8670	tags=36%, list=16%, signal=43%
GO_NUCLEAR_CHROMOSOME_SEGREGATION	GO_NUCLEAR_CHROMOSOME_SEGREGATION		220	0.36901823	1.0567043	0.4	0.795495	1.0	15488	tags=46%, list=29%, signal=64%
GO_REGULATION_OF_PROTEIN_UBIQUITINATION_INVOLVED_IN_UBIQUITIN_DEPENDENT_PROTEIN_CATABOLIC_PROCESS	GO_REGULATION_OF_PROTEIN_UBIQUITINATION_INVOLVED_IN_UBIQUITIN_DEPENDENT_PROTEIN_CATABOLIC_PROCESS		102	0.33969715	1.0564429	0.36885247	0.7953644	1.0	15874	tags=47%, list=29%, signal=66%
GO_CELLULAR_RESPONSE_TO_ALKALOID	GO_CELLULAR_RESPONSE_TO_ALKALOID		33	0.37351516	1.0551332	0.33653846	0.7987408	1.0	12148	tags=42%, list=22%, signal=55%
GO_MHC_PROTEIN_COMPLEX_BINDING	GO_MHC_PROTEIN_COMPLEX_BINDING		18	0.4448259	1.0538111	0.36750484	0.8021226	1.0	9837	tags=56%, list=18%, signal=68%
GO_VERY_LONG_CHAIN_FATTY_ACID_METABOLIC_PROCESS	GO_VERY_LONG_CHAIN_FATTY_ACID_METABOLIC_PROCESS		29	0.40438107	1.0535456	0.3880309	0.8019999	1.0	9625	tags=34%, list=18%, signal=42%
GO_L_AMINO_ACID_TRANSMEMBRANE_TRANSPORTER_ACTIVITY	GO_L_AMINO_ACID_TRANSMEMBRANE_TRANSPORTER_ACTIVITY		53	0.3688622	1.0529563	0.37209302	0.80295193	1.0	10129	tags=42%, list=19%, signal=51%
GO_PRECATALYTIC_SPLICEOSOME	GO_PRECATALYTIC_SPLICEOSOME		22	0.47377235	1.052888	0.41764706	0.8021606	1.0	17329	tags=64%, list=32%, signal=93%
GO_MITOGEN_ACTIVATED_PROTEIN_KINASE_BINDING	GO_MITOGEN_ACTIVATED_PROTEIN_KINASE_BINDING		24	0.39750394	1.0518767	0.3745098	0.80461913	1.0	16117	tags=54%, list=30%, signal=77%
GO_REGULATION_OF_EXTRINSIC_APOPTOTIC_SIGNALING_PATHWAY_VIA_DEATH_DOMAIN_RECEPTORS	GO_REGULATION_OF_EXTRINSIC_APOPTOTIC_SIGNALING_PATHWAY_VIA_DEATH_DOMAIN_RECEPTORS		55	0.33245146	1.050682	0.37022132	0.80761963	1.0	16442	tags=55%, list=30%, signal=78%
GO_REGULATION_OF_MICROTUBULE_BASED_PROCESS	GO_REGULATION_OF_MICROTUBULE_BASED_PROCESS		235	0.32665718	1.0506536	0.376	0.80671227	1.0	11017	tags=34%, list=20%, signal=43%
GO_CATION_AMINO_ACID_SYMPORTER_ACTIVITY	GO_CATION_AMINO_ACID_SYMPORTER_ACTIVITY		16	0.45355213	1.049086	0.41520467	0.81110543	1.0	8619	tags=50%, list=16%, signal=59%
GO_NEGATIVE_REGULATION_OF_RESPONSE_TO_CYTOKINE_STIMULUS	GO_NEGATIVE_REGULATION_OF_RESPONSE_TO_CYTOKINE_STIMULUS		42	0.33883312	1.0486977	0.344	0.8114528	1.0	7738	tags=21%, list=14%, signal=25%
GO_GLUCOSE_CATABOLIC_PROCESS	GO_GLUCOSE_CATABOLIC_PROCESS		27	0.38843042	1.0467333	0.38603696	0.816967	1.0	17280	tags=59%, list=32%, signal=87%
GO_REGULATION_OF_MYOBLAST_FUSION	GO_REGULATION_OF_MYOBLAST_FUSION		19	0.40839335	1.0466872	0.38551858	0.81610006	1.0	13062	tags=37%, list=24%, signal=49%
GO_MICROTUBULE_NUCLEATION	GO_MICROTUBULE_NUCLEATION		18	0.40984312	1.0452203	0.40248963	0.8200918	1.0	8132	tags=33%, list=15%, signal=39%
GO_SKELETAL_MUSCLE_TISSUE_REGENERATION	GO_SKELETAL_MUSCLE_TISSUE_REGENERATION		26	0.37411937	1.0450127	0.38579655	0.8197286	1.0	6107	tags=27%, list=11%, signal=30%
GO_REGULATION_OF_NEURON_PROJECTION_REGENERATION	GO_REGULATION_OF_NEURON_PROJECTION_REGENERATION		20	0.38239598	1.0444831	0.37072244	0.8204693	1.0	7345	tags=35%, list=14%, signal=40%
GO_POSTTRANSCRIPTIONAL_GENE_SILENCING	GO_POSTTRANSCRIPTIONAL_GENE_SILENCING		37	0.40732774	1.0444692	0.43137255	0.81950897	1.0	17237	tags=59%, list=32%, signal=87%
GO_INTRACELLULAR_STEROID_HORMONE_RECEPTOR_SIGNALING_PATHWAY	GO_INTRACELLULAR_STEROID_HORMONE_RECEPTOR_SIGNALING_PATHWAY		70	0.3100651	1.044167	0.36790606	0.8194316	1.0	14373	tags=36%, list=26%, signal=49%
GO_DNA_INTEGRITY_CHECKPOINT	GO_DNA_INTEGRITY_CHECKPOINT		141	0.33482367	1.0439895	0.40120968	0.81902844	1.0	11781	tags=33%, list=22%, signal=42%
GO_NUCLEAR_INNER_MEMBRANE	GO_NUCLEAR_INNER_MEMBRANE		53	0.3349154	1.0436774	0.37843138	0.81910056	1.0	9337	tags=28%, list=17%, signal=34%
GO_ATP_GENERATION_FROM_ADP	GO_ATP_GENERATION_FROM_ADP		36	0.3624005	1.0434352	0.3822314	0.8189341	1.0	17280	tags=56%, list=32%, signal=81%
GO_L_AMINO_ACID_TRANSPORT	GO_L_AMINO_ACID_TRANSPORT		57	0.35115996	1.0430667	0.38019803	0.81918186	1.0	11380	tags=42%, list=21%, signal=53%
GO_INTRASPECIES_INTERACTION_BETWEEN_ORGANISMS	GO_INTRASPECIES_INTERACTION_BETWEEN_ORGANISMS		45	0.34724012	1.043006	0.3682243	0.818359	1.0	7473	tags=31%, list=14%, signal=36%
GO_VACUOLAR_TRANSPORT	GO_VACUOLAR_TRANSPORT		241	0.29282993	1.0429935	0.36935166	0.817392	1.0	11032	tags=29%, list=20%, signal=36%
GO_NEGATIVE_REGULATION_OF_CELL_DIVISION	GO_NEGATIVE_REGULATION_OF_CELL_DIVISION		59	0.35895616	1.042953	0.37204725	0.8165155	1.0	13190	tags=42%, list=24%, signal=56%
GO_CELL_CYCLE_CHECKPOINT	GO_CELL_CYCLE_CHECKPOINT		186	0.32905522	1.042887	0.42772278	0.81575847	1.0	12023	tags=35%, list=22%, signal=45%
GO_SCAFFOLD_PROTEIN_BINDING	GO_SCAFFOLD_PROTEIN_BINDING		45	0.3408362	1.0418854	0.4056604	0.8182206	1.0	10735	tags=38%, list=20%, signal=47%
GO_INTERACTION_WITH_SYMBIONT	GO_INTERACTION_WITH_SYMBIONT		52	0.318435	1.0417715	0.3592233	0.817647	1.0	13673	tags=42%, list=25%, signal=57%
GO_NEURON_DEATH	GO_NEURON_DEATH		47	0.33905143	1.04097	0.36116505	0.8193746	1.0	7555	tags=34%, list=14%, signal=40%
GO_REGULATION_OF_DNA_TEMPLATED_TRANSCRIPTION_INITIATION	GO_REGULATION_OF_DNA_TEMPLATED_TRANSCRIPTION_INITIATION		31	0.3875856	1.0405025	0.42544731	0.8199503	1.0	13603	tags=45%, list=25%, signal=60%
GO_SOLUTE_PROTON_ANTIPORTER_ACTIVITY	GO_SOLUTE_PROTON_ANTIPORTER_ACTIVITY		18	0.39659595	1.0402914	0.3920792	0.8197164	1.0	6141	tags=28%, list=11%, signal=31%
GO_REGULATION_OF_ANDROGEN_RECEPTOR_SIGNALING_PATHWAY	GO_REGULATION_OF_ANDROGEN_RECEPTOR_SIGNALING_PATHWAY		22	0.382112	1.039954	0.39615384	0.8198797	1.0	11268	tags=50%, list=21%, signal=63%
GO_CELLULAR_ALDEHYDE_METABOLIC_PROCESS	GO_CELLULAR_ALDEHYDE_METABOLIC_PROCESS		83	0.3358226	1.0395155	0.38640776	0.82038456	1.0	13568	tags=41%, list=25%, signal=55%
GO_GERM_CELL_DEVELOPMENT	GO_GERM_CELL_DEVELOPMENT		202	0.2886435	1.0392553	0.35490197	0.8202739	1.0	11730	tags=32%, list=22%, signal=41%
GO_REGULATION_OF_DNA_DEPENDENT_DNA_REPLICATION	GO_REGULATION_OF_DNA_DEPENDENT_DNA_REPLICATION		40	0.41028243	1.0389768	0.40429688	0.82022226	1.0	13122	tags=45%, list=24%, signal=59%
GO_OUTER_MEMBRANE	GO_OUTER_MEMBRANE		179	0.28744394	1.0387095	0.3731959	0.82011795	1.0	10371	tags=29%, list=19%, signal=36%
GO_GENERATION_OF_PRECURSOR_METABOLITES_AND_ENERGY	GO_GENERATION_OF_PRECURSOR_METABOLITES_AND_ENERGY		281	0.29848838	1.0366323	0.38910505	0.8259669	1.0	14241	tags=40%, list=26%, signal=53%
GO_PYRIMIDINE_NUCLEOBASE_METABOLIC_PROCESS	GO_PYRIMIDINE_NUCLEOBASE_METABOLIC_PROCESS		19	0.36243325	1.0365206	0.3888889	0.825338	1.0	6311	tags=32%, list=12%, signal=36%
GO_B_CELL_ACTIVATION	GO_B_CELL_ACTIVATION		131	0.28882733	1.0360261	0.36491936	0.82605857	1.0	12110	tags=29%, list=22%, signal=37%
GO_REGULATION_OF_CYSTEINE_TYPE_ENDOPEPTIDASE_ACTIVITY	GO_REGULATION_OF_CYSTEINE_TYPE_ENDOPEPTIDASE_ACTIVITY		211	0.28101793	1.0359656	0.36790606	0.82527614	1.0	14346	tags=38%, list=26%, signal=52%
GO_CHROMOSOME_SEPARATION	GO_CHROMOSOME_SEPARATION		18	0.44330212	1.035203	0.4194831	0.82687724	1.0	13322	tags=56%, list=25%, signal=74%
GO_ALDITOL_METABOLIC_PROCESS	GO_ALDITOL_METABOLIC_PROCESS		20	0.45193702	1.0350899	0.43558282	0.82625395	1.0	10582	tags=45%, list=19%, signal=56%
GO_NEGATIVE_REGULATION_OF_CELLULAR_CATABOLIC_PROCESS	GO_NEGATIVE_REGULATION_OF_CELLULAR_CATABOLIC_PROCESS		153	0.2911096	1.0349547	0.38206628	0.8257275	1.0	12023	tags=34%, list=22%, signal=44%
GO_SH2_DOMAIN_BINDING	GO_SH2_DOMAIN_BINDING		29	0.3364129	1.0339144	0.3889943	0.82833534	1.0	8847	tags=34%, list=16%, signal=41%
GO_RESPONSE_TO_VIRUS	GO_RESPONSE_TO_VIRUS		241	0.33411267	1.0335671	0.41344196	0.8284795	1.0	12082	tags=34%, list=22%, signal=43%
GO_SPINDLE	GO_SPINDLE		273	0.32964137	1.0332006	0.39468303	0.8287573	1.0	12907	tags=36%, list=24%, signal=47%
GO_REGULATION_OF_CELL_CYCLE_PHASE_TRANSITION	GO_REGULATION_OF_CELL_CYCLE_PHASE_TRANSITION		316	0.309793	1.0321379	0.4060606	0.831293	1.0	13671	tags=40%, list=25%, signal=53%
GO_NEGATIVE_REGULATION_OF_ORGANELLE_ORGANIZATION	GO_NEGATIVE_REGULATION_OF_ORGANELLE_ORGANIZATION		378	0.29429552	1.0319185	0.3980198	0.8309826	1.0	12616	tags=35%, list=23%, signal=46%
GO_CELL_CYCLE_ARREST	GO_CELL_CYCLE_ARREST		145	0.29304403	1.0314595	0.37572256	0.83152616	1.0	10635	tags=30%, list=20%, signal=37%
GO_POLY_PURINE_TRACT_BINDING	GO_POLY_PURINE_TRACT_BINDING		18	0.43638492	1.0314056	0.4418146	0.8306969	1.0	12668	tags=44%, list=23%, signal=58%
GO_SPINDLE_MICROTUBULE	GO_SPINDLE_MICROTUBULE		57	0.38257438	1.0310428	0.42510122	0.83095485	1.0	10545	tags=35%, list=19%, signal=44%
GO_POLE_PLASM	GO_POLE_PLASM		15	0.43809757	1.0310155	0.41954023	0.8300592	1.0	14166	tags=60%, list=26%, signal=81%
GO_S_ACYLTRANSFERASE_ACTIVITY	GO_S_ACYLTRANSFERASE_ACTIVITY		29	0.3681802	1.0298494	0.3972332	0.83295995	1.0	7330	tags=24%, list=14%, signal=28%
GO_INSULIN_SECRETION	GO_INSULIN_SECRETION		38	0.32846636	1.0291464	0.39816514	0.8343612	1.0	6316	tags=24%, list=12%, signal=27%
GO_FEMALE_GAMETE_GENERATION	GO_FEMALE_GAMETE_GENERATION		93	0.2883167	1.0291156	0.36685288	0.83348596	1.0	11581	tags=28%, list=21%, signal=35%
GO_INCLUSION_BODY	GO_INCLUSION_BODY		68	0.3287561	1.0284078	0.388	0.8348416	1.0	13134	tags=41%, list=24%, signal=54%
GO_ESTABLISHMENT_OF_PROTEIN_LOCALIZATION_TO_VACUOLE	GO_ESTABLISHMENT_OF_PROTEIN_LOCALIZATION_TO_VACUOLE		32	0.3473588	1.0275826	0.44399184	0.83663636	1.0	7473	tags=28%, list=14%, signal=33%
GO_CELLULAR_RESPONSE_TO_REACTIVE_OXYGEN_SPECIES	GO_CELLULAR_RESPONSE_TO_REACTIVE_OXYGEN_SPECIES		102	0.27510285	1.0273108	0.39885497	0.8365645	1.0	9201	tags=29%, list=17%, signal=35%
GO_REGULATION_OF_FIBROBLAST_MIGRATION	GO_REGULATION_OF_FIBROBLAST_MIGRATION		27	0.37334096	1.0270147	0.42382812	0.83659834	1.0	11691	tags=41%, list=22%, signal=52%
GO_POSITIVE_REGULATION_OF_DNA_REPLICATION	GO_POSITIVE_REGULATION_OF_DNA_REPLICATION		86	0.3124139	1.0269743	0.39961758	0.8357576	1.0	11691	tags=36%, list=22%, signal=46%
GO_MULTI_ORGANISM_ORGANELLE_ORGANIZATION	GO_MULTI_ORGANISM_ORGANELLE_ORGANIZATION		23	0.39812046	1.0264109	0.4228457	0.83664006	1.0	9845	tags=30%, list=18%, signal=37%
GO_AU_RICH_ELEMENT_BINDING	GO_AU_RICH_ELEMENT_BINDING		22	0.43106106	1.0260375	0.44212523	0.83687836	1.0	7656	tags=32%, list=14%, signal=37%
GO_NEGATIVE_REGULATION_OF_EXTRINSIC_APOPTOTIC_SIGNALING_PATHWAY_VIA_DEATH_DOMAIN_RECEPTORS	GO_NEGATIVE_REGULATION_OF_EXTRINSIC_APOPTOTIC_SIGNALING_PATHWAY_VIA_DEATH_DOMAIN_RECEPTORS		34	0.34366965	1.0259773	0.41601562	0.83611655	1.0	16442	tags=53%, list=30%, signal=76%
GO_DNA_DAMAGE_RESPONSE_SIGNAL_TRANSDUCTION_RESULTING_IN_TRANSCRIPTION	GO_DNA_DAMAGE_RESPONSE_SIGNAL_TRANSDUCTION_RESULTING_IN_TRANSCRIPTION		15	0.41444582	1.0256958	0.42857143	0.8360579	1.0	9028	tags=33%, list=17%, signal=40%
GO_GENE_SILENCING_BY_RNA	GO_GENE_SILENCING_BY_RNA		132	0.36399546	1.0253367	0.42714572	0.8362863	1.0	14275	tags=42%, list=26%, signal=57%
GO_CELLULAR_PROCESS_INVOLVED_IN_REPRODUCTION_IN_MULTICELLULAR_ORGANISM	GO_CELLULAR_PROCESS_INVOLVED_IN_REPRODUCTION_IN_MULTICELLULAR_ORGANISM		244	0.27158436	1.0253122	0.38636363	0.8353962	1.0	12055	tags=32%, list=22%, signal=40%
GO_PURINE_RIBONUCLEOSIDE_BISPHOSPHATE_METABOLIC_PROCESS	GO_PURINE_RIBONUCLEOSIDE_BISPHOSPHATE_METABOLIC_PROCESS		20	0.405769	1.024828	0.40117416	0.83606875	1.0	13463	tags=40%, list=25%, signal=53%
GO_ANAPHASE_PROMOTING_COMPLEX_DEPENDENT_CATABOLIC_PROCESS	GO_ANAPHASE_PROMOTING_COMPLEX_DEPENDENT_CATABOLIC_PROCESS		76	0.36375523	1.0246011	0.41955194	0.83589244	1.0	15819	tags=49%, list=29%, signal=69%
GO_REGULATION_OF_PROTEIN_MODIFICATION_BY_SMALL_PROTEIN_CONJUGATION_OR_REMOVAL	GO_REGULATION_OF_PROTEIN_MODIFICATION_BY_SMALL_PROTEIN_CONJUGATION_OR_REMOVAL		273	0.29363587	1.0238867	0.39405942	0.837333	1.0	11989	tags=32%, list=22%, signal=41%
GO_NEGATIVE_REGULATION_OF_VIRAL_GENOME_REPLICATION	GO_NEGATIVE_REGULATION_OF_VIRAL_GENOME_REPLICATION		48	0.4512658	1.0235716	0.47283703	0.83743566	1.0	10950	tags=42%, list=20%, signal=52%
GO_NIK_NF_KAPPAB_SIGNALING	GO_NIK_NF_KAPPAB_SIGNALING		83	0.3596635	1.0228058	0.42379957	0.83900726	1.0	13603	tags=41%, list=25%, signal=55%
GO_POSITIVE_REGULATION_OF_TELOMERASE_ACTIVITY	GO_POSITIVE_REGULATION_OF_TELOMERASE_ACTIVITY		28	0.3594235	1.0225233	0.4455253	0.838917	1.0	15686	tags=46%, list=29%, signal=65%
GO_ACTIVATION_OF_NF_KAPPAB_INDUCING_KINASE_ACTIVITY	GO_ACTIVATION_OF_NF_KAPPAB_INDUCING_KINASE_ACTIVITY		17	0.4050454	1.0211585	0.4114053	0.8425854	1.0	16548	tags=65%, list=30%, signal=93%
GO_LIGAND_DEPENDENT_NUCLEAR_RECEPTOR_TRANSCRIPTION_COACTIVATOR_ACTIVITY	GO_LIGAND_DEPENDENT_NUCLEAR_RECEPTOR_TRANSCRIPTION_COACTIVATOR_ACTIVITY		52	0.3376642	1.0206435	0.4032258	0.84327036	1.0	17779	tags=60%, list=33%, signal=89%
GO_REGULATION_OF_SYMBIOSIS_ENCOMPASSING_MUTUALISM_THROUGH_PARASITISM	GO_REGULATION_OF_SYMBIOSIS_ENCOMPASSING_MUTUALISM_THROUGH_PARASITISM		198	0.3103237	1.0205609	0.42261904	0.84261036	1.0	10950	tags=32%, list=20%, signal=40%
GO_ERBB2_SIGNALING_PATHWAY	GO_ERBB2_SIGNALING_PATHWAY		39	0.32827142	1.020299	0.44163424	0.8425075	1.0	10901	tags=36%, list=20%, signal=45%
GO_ANDROGEN_METABOLIC_PROCESS	GO_ANDROGEN_METABOLIC_PROCESS		30	0.377543	1.0196695	0.4396887	0.84361917	1.0	2952	tags=20%, list=5%, signal=21%
GO_RESPONSE_TO_DEXAMETHASONE	GO_RESPONSE_TO_DEXAMETHASONE		33	0.36722362	1.0193394	0.42592594	0.8438001	1.0	13344	tags=39%, list=25%, signal=52%
GO_REGULATION_OF_VIRAL_GENOME_REPLICATION	GO_REGULATION_OF_VIRAL_GENOME_REPLICATION		74	0.37290466	1.0192066	0.45674044	0.8432835	1.0	16284	tags=50%, list=30%, signal=71%
GO_ORGANIC_ACID_SODIUM_SYMPORTER_ACTIVITY	GO_ORGANIC_ACID_SODIUM_SYMPORTER_ACTIVITY		30	0.40451685	1.0188547	0.41713223	0.84352833	1.0	9449	tags=43%, list=17%, signal=52%
GO_CHROMOSOME_CONDENSATION	GO_CHROMOSOME_CONDENSATION		30	0.39305764	1.0188408	0.46044624	0.8426145	1.0	10096	tags=30%, list=19%, signal=37%
GO_DENDRITIC_CELL_DIFFERENTIATION	GO_DENDRITIC_CELL_DIFFERENTIATION		32	0.34581986	1.0175579	0.4189189	0.84583634	1.0	7624	tags=25%, list=14%, signal=29%
GO_ERROR_FREE_TRANSLESION_SYNTHESIS	GO_ERROR_FREE_TRANSLESION_SYNTHESIS		18	0.43471843	1.0173788	0.44959676	0.8454654	1.0	14202	tags=44%, list=26%, signal=60%
GO_SEGMENT_SPECIFICATION	GO_SEGMENT_SPECIFICATION		17	0.3848153	1.0160385	0.44379845	0.8488764	1.0	11989	tags=47%, list=22%, signal=60%
GO_POSITIVE_REGULATION_OF_NIK_NF_KAPPAB_SIGNALING	GO_POSITIVE_REGULATION_OF_NIK_NF_KAPPAB_SIGNALING		29	0.36282295	1.0157084	0.40674603	0.8489828	1.0	13383	tags=45%, list=25%, signal=59%
GO_REGULATION_OF_CELLULAR_SENESCENCE	GO_REGULATION_OF_CELLULAR_SENESCENCE		26	0.38787457	1.0144677	0.45309383	0.85210705	1.0	15856	tags=69%, list=29%, signal=98%
GO_CYTOKINE_PRODUCTION_INVOLVED_IN_IMMUNE_RESPONSE	GO_CYTOKINE_PRODUCTION_INVOLVED_IN_IMMUNE_RESPONSE		17	0.38669378	1.0142308	0.434	0.8518711	1.0	6520	tags=35%, list=12%, signal=40%
GO_LYSINE_N_METHYLTRANSFERASE_ACTIVITY	GO_LYSINE_N_METHYLTRANSFERASE_ACTIVITY		50	0.3634203	1.0137984	0.45833334	0.85236907	1.0	7892	tags=32%, list=15%, signal=37%
GO_OXIDOREDUCTASE_ACTIVITY_ACTING_ON_THE_CH_NH_GROUP_OF_DONORS	GO_OXIDOREDUCTASE_ACTIVITY_ACTING_ON_THE_CH_NH_GROUP_OF_DONORS		28	0.36760718	1.0135534	0.45309383	0.8522715	1.0	16124	tags=46%, list=30%, signal=66%
GO_EXTRINSIC_APOPTOTIC_SIGNALING_PATHWAY_VIA_DEATH_DOMAIN_RECEPTORS	GO_EXTRINSIC_APOPTOTIC_SIGNALING_PATHWAY_VIA_DEATH_DOMAIN_RECEPTORS		39	0.36770648	1.0133039	0.44615385	0.8521125	1.0	13053	tags=51%, list=24%, signal=67%
GO_POSITIVE_REGULATION_OF_CYSTEINE_TYPE_ENDOPEPTIDASE_ACTIVITY_INVOLVED_IN_APOPTOTIC_SIGNALING_PATHWAY	GO_POSITIVE_REGULATION_OF_CYSTEINE_TYPE_ENDOPEPTIDASE_ACTIVITY_INVOLVED_IN_APOPTOTIC_SIGNALING_PATHWAY		17	0.42774203	1.0128022	0.44129553	0.85282266	1.0	16442	tags=76%, list=30%, signal=110%
GO_NEGATIVE_REGULATION_OF_CELLULAR_AMIDE_METABOLIC_PROCESS	GO_NEGATIVE_REGULATION_OF_CELLULAR_AMIDE_METABOLIC_PROCESS		124	0.31840926	1.0126946	0.4533074	0.8522024	1.0	10943	tags=34%, list=20%, signal=42%
GO_MICROTUBULE_CYTOSKELETON_ORGANIZATION	GO_MICROTUBULE_CYTOSKELETON_ORGANIZATION		328	0.30679226	1.0125929	0.41516966	0.8515811	1.0	11158	tags=32%, list=21%, signal=40%
GO_REGULATION_OF_PROTEIN_CATABOLIC_PROCESS	GO_REGULATION_OF_PROTEIN_CATABOLIC_PROCESS		385	0.2773174	1.0122625	0.41550696	0.8517587	1.0	14092	tags=37%, list=26%, signal=50%
GO_PROTEIN_TYROSINE_SERINE_THREONINE_PHOSPHATASE_ACTIVITY	GO_PROTEIN_TYROSINE_SERINE_THREONINE_PHOSPHATASE_ACTIVITY		44	0.3273409	1.0121328	0.42519686	0.851194	1.0	10121	tags=36%, list=19%, signal=45%
GO_VESICLE_DOCKING	GO_VESICLE_DOCKING		55	0.33593652	1.0114653	0.41980198	0.852461	1.0	14356	tags=45%, list=26%, signal=62%
GO_REGULATION_OF_DOUBLE_STRAND_BREAK_REPAIR	GO_REGULATION_OF_DOUBLE_STRAND_BREAK_REPAIR		35	0.3997702	1.0111367	0.45401174	0.85255784	1.0	17033	tags=51%, list=31%, signal=75%
GO_RESPONSE_TO_DSRNA	GO_RESPONSE_TO_DSRNA		68	0.31659177	1.0110712	0.40674603	0.8517883	1.0	16647	tags=44%, list=31%, signal=64%
GO_REGULATION_OF_MRNA_3_END_PROCESSING	GO_REGULATION_OF_MRNA_3_END_PROCESSING		26	0.42202446	1.0106715	0.47843942	0.85219616	1.0	11611	tags=38%, list=21%, signal=49%
GO_REGULATION_OF_ANTIGEN_PROCESSING_AND_PRESENTATION	GO_REGULATION_OF_ANTIGEN_PROCESSING_AND_PRESENTATION		23	0.38568363	1.0105691	0.43849206	0.85160166	1.0	7698	tags=35%, list=14%, signal=41%
GO_PROTEIN_SERINE_THREONINE_KINASE_ACTIVATOR_ACTIVITY	GO_PROTEIN_SERINE_THREONINE_KINASE_ACTIVATOR_ACTIVITY		19	0.36755118	1.0104473	0.45224172	0.8510907	1.0	8761	tags=37%, list=16%, signal=44%
GO_NUCLEAR_ENVELOPE_REASSEMBLY	GO_NUCLEAR_ENVELOPE_REASSEMBLY		17	0.4478018	1.0103326	0.47291666	0.8505263	1.0	13539	tags=41%, list=25%, signal=55%
GO_SCF_DEPENDENT_PROTEASOMAL_UBIQUITIN_DEPENDENT_PROTEIN_CATABOLIC_PROCESS	GO_SCF_DEPENDENT_PROTEASOMAL_UBIQUITIN_DEPENDENT_PROTEIN_CATABOLIC_PROCESS		23	0.3705974	1.0098183	0.43992248	0.85126877	1.0	5064	tags=22%, list=9%, signal=24%
GO_REGULATION_OF_PROTEIN_HOMODIMERIZATION_ACTIVITY	GO_REGULATION_OF_PROTEIN_HOMODIMERIZATION_ACTIVITY		22	0.36177084	1.0097471	0.46365422	0.85056955	1.0	16442	tags=55%, list=30%, signal=78%
GO_ANION_CATION_SYMPORTER_ACTIVITY	GO_ANION_CATION_SYMPORTER_ACTIVITY		53	0.36036727	1.0095938	0.4362292	0.85013384	1.0	9867	tags=38%, list=18%, signal=46%
GO_TRNA_TRANSPORT	GO_TRNA_TRANSPORT		33	0.45139086	1.0093207	0.5	0.8500898	1.0	8259	tags=33%, list=15%, signal=39%
GO_PROTEIN_ADP_RIBOSYLATION	GO_PROTEIN_ADP_RIBOSYLATION		20	0.41212764	1.0091597	0.44249514	0.8496687	1.0	10107	tags=45%, list=19%, signal=55%
GO_POSITIVE_REGULATION_OF_MRNA_METABOLIC_PROCESS	GO_POSITIVE_REGULATION_OF_MRNA_METABOLIC_PROCESS		44	0.36664677	1.0091373	0.46561885	0.84879774	1.0	10374	tags=32%, list=19%, signal=39%
GO_NEGATIVE_REGULATION_OF_RESPONSE_TO_DNA_DAMAGE_STIMULUS	GO_NEGATIVE_REGULATION_OF_RESPONSE_TO_DNA_DAMAGE_STIMULUS		49	0.32507154	1.0090199	0.42322835	0.8482352	1.0	9147	tags=33%, list=17%, signal=39%
GO_ENDOPLASMIC_RETICULUM_SUBCOMPARTMENT	GO_ENDOPLASMIC_RETICULUM_SUBCOMPARTMENT		16	0.4144267	1.0088396	0.45656565	0.84789366	1.0	11652	tags=50%, list=21%, signal=64%
GO_REGULATION_OF_CELLULAR_PROTEIN_CATABOLIC_PROCESS	GO_REGULATION_OF_CELLULAR_PROTEIN_CATABOLIC_PROCESS		268	0.28378165	1.0080531	0.41666666	0.84954375	1.0	13612	tags=38%, list=25%, signal=51%
GO_ORGANOPHOSPHATE_CATABOLIC_PROCESS	GO_ORGANOPHOSPHATE_CATABOLIC_PROCESS		112	0.3074182	1.0080322	0.43953934	0.84868556	1.0	14025	tags=38%, list=26%, signal=50%
GO_RESPONSE_TO_ISOQUINOLINE_ALKALOID	GO_RESPONSE_TO_ISOQUINOLINE_ALKALOID		30	0.33744577	1.0080101	0.43907157	0.8478115	1.0	16230	tags=47%, list=30%, signal=67%
GO_PHOSPHATIDYLINOSITOL_BIOSYNTHETIC_PROCESS	GO_PHOSPHATIDYLINOSITOL_BIOSYNTHETIC_PROCESS		119	0.29627657	1.0079783	0.43385214	0.8469603	1.0	10957	tags=34%, list=20%, signal=43%
GO_PHOSPHOLIPID_TRANSPORTER_ACTIVITY	GO_PHOSPHOLIPID_TRANSPORTER_ACTIVITY		47	0.3225807	1.0079435	0.4280303	0.84615225	1.0	9650	tags=30%, list=18%, signal=36%
GO_CELL_DIVISION	GO_CELL_DIVISION		437	0.3131676	1.00728	0.434	0.84740585	1.0	15614	tags=43%, list=29%, signal=60%
GO_NEGATIVE_REGULATION_OF_CELL_CYCLE_PROCESS	GO_NEGATIVE_REGULATION_OF_CELL_CYCLE_PROCESS		209	0.30915	1.0071124	0.45328033	0.8469931	1.0	11781	tags=34%, list=22%, signal=44%
GO_PROTEIN_PHOSPHATASE_1_BINDING	GO_PROTEIN_PHOSPHATASE_1_BINDING		19	0.37429455	1.0060301	0.45691383	0.8495978	1.0	17680	tags=74%, list=33%, signal=109%
GO_CILIARY_BASE	GO_CILIARY_BASE		23	0.38340774	1.0058166	0.4556213	0.84932953	1.0	12401	tags=48%, list=23%, signal=62%
GO_THIOESTER_METABOLIC_PROCESS	GO_THIOESTER_METABOLIC_PROCESS		80	0.35085166	1.0056673	0.4385965	0.84891194	1.0	17170	tags=52%, list=32%, signal=77%
GO_ENDOSOME_ORGANIZATION	GO_ENDOSOME_ORGANIZATION		61	0.34271666	1.0053704	0.43548387	0.84892523	1.0	17779	tags=52%, list=33%, signal=78%
GO_REGULATION_OF_MITOTIC_CELL_CYCLE	GO_REGULATION_OF_MITOTIC_CELL_CYCLE		456	0.2895068	1.005314	0.43307087	0.8481709	1.0	13694	tags=37%, list=25%, signal=49%
GO_NEGATIVE_REGULATION_OF_CHROMOSOME_SEGREGATION	GO_NEGATIVE_REGULATION_OF_CHROMOSOME_SEGREGATION		28	0.4035236	1.0049415	0.46153846	0.8484482	1.0	12907	tags=46%, list=24%, signal=61%
GO_NUCLEAR_SPECK	GO_NUCLEAR_SPECK		189	0.34081218	1.0033369	0.4922179	0.8527165	1.0	12976	tags=37%, list=24%, signal=49%
GO_MEMBRANE_ASSEMBLY	GO_MEMBRANE_ASSEMBLY		25	0.37939167	1.0031402	0.43469387	0.85246235	1.0	13726	tags=60%, list=25%, signal=80%
GO_NEGATIVE_REGULATION_OF_CELL_CYCLE	GO_NEGATIVE_REGULATION_OF_CELL_CYCLE		418	0.27883035	1.0009845	0.44	0.8586045	1.0	11825	tags=32%, list=22%, signal=41%
GO_POSITIVE_CHEMOTAXIS	GO_POSITIVE_CHEMOTAXIS		36	0.34700304	1.0008869	0.41153845	0.8580028	1.0	15923	tags=56%, list=29%, signal=79%
GO_REGULATION_OF_HISTONE_METHYLATION	GO_REGULATION_OF_HISTONE_METHYLATION		52	0.36491486	1.000607	0.4642857	0.8579345	1.0	16312	tags=58%, list=30%, signal=82%
GO_CARBOHYDRATE_CATABOLIC_PROCESS	GO_CARBOHYDRATE_CATABOLIC_PROCESS		108	0.3047136	1.0005966	0.4632207	0.85703933	1.0	9683	tags=29%, list=18%, signal=35%
GO_PYRIMIDINE_CONTAINING_COMPOUND_CATABOLIC_PROCESS	GO_PYRIMIDINE_CONTAINING_COMPOUND_CATABOLIC_PROCESS		31	0.33806038	1.0002671	0.44444445	0.85723007	1.0	7649	tags=29%, list=14%, signal=34%
GO_POSITIVE_REGULATION_OF_ANTIGEN_PROCESSING_AND_PRESENTATION	GO_POSITIVE_REGULATION_OF_ANTIGEN_PROCESSING_AND_PRESENTATION		16	0.41454473	0.99979395	0.46705428	0.8578614	1.0	12503	tags=50%, list=23%, signal=65%
GO_SNAP_RECEPTOR_ACTIVITY	GO_SNAP_RECEPTOR_ACTIVITY		38	0.3547575	0.99955523	0.44023904	0.8577198	1.0	14196	tags=39%, list=26%, signal=53%
GO_PROTEIN_TRANSMEMBRANE_TRANSPORT	GO_PROTEIN_TRANSMEMBRANE_TRANSPORT		50	0.33265635	0.9988945	0.45124283	0.8589778	1.0	16325	tags=46%, list=30%, signal=66%
GO_NEUTRAL_AMINO_ACID_TRANSPORT	GO_NEUTRAL_AMINO_ACID_TRANSPORT		33	0.3527733	0.9987396	0.43785852	0.85853386	1.0	9168	tags=33%, list=17%, signal=40%
GO_MYOSIN_V_BINDING	GO_MYOSIN_V_BINDING		17	0.37595955	0.99837655	0.45384616	0.85878557	1.0	9802	tags=29%, list=18%, signal=36%
GO_CELLULAR_RESPONSE_TO_AMINO_ACID_STARVATION	GO_CELLULAR_RESPONSE_TO_AMINO_ACID_STARVATION		25	0.33722898	0.996913	0.45686275	0.8627732	1.0	14055	tags=44%, list=26%, signal=59%
GO_STEROID_HORMONE_RECEPTOR_BINDING	GO_STEROID_HORMONE_RECEPTOR_BINDING		80	0.29945707	0.9964993	0.43809524	0.86318207	1.0	14373	tags=43%, list=26%, signal=58%
GO_PROTEIN_ALKYLATION	GO_PROTEIN_ALKYLATION		109	0.33849818	0.9962251	0.46520874	0.8631346	1.0	11937	tags=39%, list=22%, signal=49%
GO_NEGATIVE_REGULATION_OF_INTRINSIC_APOPTOTIC_SIGNALING_PATHWAY_IN_RESPONSE_TO_DNA_DAMAGE	GO_NEGATIVE_REGULATION_OF_INTRINSIC_APOPTOTIC_SIGNALING_PATHWAY_IN_RESPONSE_TO_DNA_DAMAGE		25	0.33003893	0.9959717	0.47206166	0.86304206	1.0	8681	tags=36%, list=16%, signal=43%
GO_REGULATION_OF_INTERFERON_ALPHA_PRODUCTION	GO_REGULATION_OF_INTERFERON_ALPHA_PRODUCTION		19	0.41342658	0.99556214	0.45833334	0.8634685	1.0	14597	tags=58%, list=27%, signal=79%
GO_NEURON_NEURON_SYNAPTIC_TRANSMISSION	GO_NEURON_NEURON_SYNAPTIC_TRANSMISSION		56	0.32438377	0.99542516	0.42910448	0.86298513	1.0	13053	tags=46%, list=24%, signal=61%
GO_CELL_DEATH_IN_RESPONSE_TO_OXIDATIVE_STRESS	GO_CELL_DEATH_IN_RESPONSE_TO_OXIDATIVE_STRESS		18	0.3755797	0.9951244	0.46216768	0.8630595	1.0	18211	tags=56%, list=34%, signal=84%
GO_MAP_KINASE_KINASE_KINASE_ACTIVITY	GO_MAP_KINASE_KINASE_KINASE_ACTIVITY		19	0.38183534	0.99494827	0.4686907	0.86271787	1.0	6819	tags=21%, list=13%, signal=24%
GO_PEROXISOME_PROLIFERATOR_ACTIVATED_RECEPTOR_BINDING	GO_PEROXISOME_PROLIFERATOR_ACTIVATED_RECEPTOR_BINDING		15	0.38754672	0.99416065	0.45746693	0.86436343	1.0	11734	tags=47%, list=22%, signal=60%
GO_CELL_PROJECTION_ASSEMBLY	GO_CELL_PROJECTION_ASSEMBLY		252	0.3145814	0.99289167	0.47991967	0.8675595	1.0	15014	tags=44%, list=28%, signal=61%
GO_POSITIVE_REGULATION_OF_SIGNAL_TRANSDUCTION_BY_P53_CLASS_MEDIATOR	GO_POSITIVE_REGULATION_OF_SIGNAL_TRANSDUCTION_BY_P53_CLASS_MEDIATOR		17	0.3977482	0.99172693	0.4774951	0.8704708	1.0	6308	tags=35%, list=12%, signal=40%
GO_DENTATE_GYRUS_DEVELOPMENT	GO_DENTATE_GYRUS_DEVELOPMENT		15	0.43788257	0.99148977	0.46385542	0.8703221	1.0	7416	tags=47%, list=14%, signal=54%
GO_RESPONSE_TO_ANTIBIOTIC	GO_RESPONSE_TO_ANTIBIOTIC		45	0.3157803	0.99103993	0.49905124	0.87090355	1.0	11825	tags=36%, list=22%, signal=45%
GO_ESTABLISHMENT_OF_MITOTIC_SPINDLE_LOCALIZATION	GO_ESTABLISHMENT_OF_MITOTIC_SPINDLE_LOCALIZATION		23	0.3839957	0.99084675	0.44624746	0.87057495	1.0	10442	tags=35%, list=19%, signal=43%
GO_ENERGY_DERIVATION_BY_OXIDATION_OF_ORGANIC_COMPOUNDS	GO_ENERGY_DERIVATION_BY_OXIDATION_OF_ORGANIC_COMPOUNDS		210	0.30145857	0.9906733	0.460039	0.8702239	1.0	14141	tags=39%, list=26%, signal=53%
GO_CHAPERONE_BINDING	GO_CHAPERONE_BINDING		79	0.2907858	0.9903436	0.47408828	0.8704217	1.0	15124	tags=46%, list=28%, signal=63%
GO_INTRINSIC_APOPTOTIC_SIGNALING_PATHWAY_BY_P53_CLASS_MEDIATOR	GO_INTRINSIC_APOPTOTIC_SIGNALING_PATHWAY_BY_P53_CLASS_MEDIATOR		52	0.3063056	0.989979	0.4767677	0.8706519	1.0	11580	tags=31%, list=21%, signal=39%
GO_TRANSCRIPTION_ELONGATION_FACTOR_COMPLEX	GO_TRANSCRIPTION_ELONGATION_FACTOR_COMPLEX		44	0.3439707	0.9892652	0.45585215	0.8720645	1.0	15226	tags=43%, list=28%, signal=60%
GO_LEFT_RIGHT_PATTERN_FORMATION	GO_LEFT_RIGHT_PATTERN_FORMATION		21	0.38026333	0.98845416	0.4566474	0.873837	1.0	4933	tags=33%, list=9%, signal=37%
GO_POSITIVE_REGULATION_OF_PROTEIN_ACETYLATION	GO_POSITIVE_REGULATION_OF_PROTEIN_ACETYLATION		36	0.32929218	0.9881005	0.46254683	0.8740726	1.0	8745	tags=28%, list=16%, signal=33%
GO_RIBONUCLEOPROTEIN_GRANULE	GO_RIBONUCLEOPROTEIN_GRANULE		142	0.3228561	0.9876712	0.48514852	0.87458694	1.0	14299	tags=42%, list=26%, signal=57%
GO_NEGATIVE_REGULATION_OF_RECEPTOR_ACTIVITY	GO_NEGATIVE_REGULATION_OF_RECEPTOR_ACTIVITY		29	0.3384899	0.98705	0.4894434	0.8757271	1.0	13907	tags=48%, list=26%, signal=65%
GO_REGULATION_OF_NUCLEAR_DIVISION	GO_REGULATION_OF_NUCLEAR_DIVISION		160	0.2885851	0.986989	0.46628132	0.8750088	1.0	12907	tags=36%, list=24%, signal=47%
GO_MALE_GERM_CELL_NUCLEUS	GO_MALE_GERM_CELL_NUCLEUS		15	0.38475195	0.98643345	0.48897797	0.8758686	1.0	8473	tags=33%, list=16%, signal=39%
GO_RESPONSE_TO_HYDROPEROXIDE	GO_RESPONSE_TO_HYDROPEROXIDE		15	0.38369682	0.98636776	0.464	0.875179	1.0	2778	tags=27%, list=5%, signal=28%
GO_AXONAL_GROWTH_CONE	GO_AXONAL_GROWTH_CONE		20	0.40347603	0.98613644	0.46530613	0.8750254	1.0	6784	tags=25%, list=13%, signal=29%
GO_CELL_CYCLE_G2_M_PHASE_TRANSITION	GO_CELL_CYCLE_G2_M_PHASE_TRANSITION		136	0.31659478	0.986026	0.47464502	0.8744574	1.0	16139	tags=46%, list=30%, signal=66%
GO_PEPTIDYL_LYSINE_METHYLATION	GO_PEPTIDYL_LYSINE_METHYLATION		68	0.3511025	0.9856566	0.49309665	0.87474424	1.0	7892	tags=29%, list=15%, signal=34%
GO_CILIUM	GO_CILIUM		450	0.2870961	0.98536235	0.46825397	0.8747935	1.0	12049	tags=32%, list=22%, signal=41%
GO_ANDROGEN_RECEPTOR_BINDING	GO_ANDROGEN_RECEPTOR_BINDING		39	0.31110284	0.9852826	0.45762712	0.874123	1.0	14151	tags=46%, list=26%, signal=62%
GO_REGULATION_OF_LIGASE_ACTIVITY	GO_REGULATION_OF_LIGASE_ACTIVITY		128	0.31238586	0.98517656	0.452	0.8735465	1.0	15937	tags=45%, list=29%, signal=64%
GO_DEPHOSPHORYLATION	GO_DEPHOSPHORYLATION		280	0.27213734	0.9847151	0.46575344	0.87416273	1.0	13728	tags=36%, list=25%, signal=48%
GO_MEMBRANE_BIOGENESIS	GO_MEMBRANE_BIOGENESIS		30	0.34547222	0.98373353	0.48856547	0.8763402	1.0	13726	tags=53%, list=25%, signal=71%
GO_REGULATION_OF_MULTI_ORGANISM_PROCESS	GO_REGULATION_OF_MULTI_ORGANISM_PROCESS		456	0.26671228	0.9837043	0.5284872	0.8755197	1.0	11096	tags=31%, list=20%, signal=38%
GO_T_CELL_APOPTOTIC_PROCESS	GO_T_CELL_APOPTOTIC_PROCESS		15	0.38368854	0.98357064	0.47619048	0.8750463	1.0	11170	tags=40%, list=21%, signal=50%
GO_REGULATION_OF_NIK_NF_KAPPAB_SIGNALING	GO_REGULATION_OF_NIK_NF_KAPPAB_SIGNALING		42	0.33050424	0.9832315	0.49618322	0.87524724	1.0	12495	tags=40%, list=23%, signal=53%
GO_SOLUTE_CATION_ANTIPORTER_ACTIVITY	GO_SOLUTE_CATION_ANTIPORTER_ACTIVITY		29	0.35713744	0.98272794	0.46561885	0.8759344	1.0	6850	tags=28%, list=13%, signal=32%
GO_THIOESTER_BIOSYNTHETIC_PROCESS	GO_THIOESTER_BIOSYNTHETIC_PROCESS		51	0.33951658	0.9825772	0.48031497	0.8755034	1.0	17915	tags=57%, list=33%, signal=85%
GO_DNA_PACKAGING	GO_DNA_PACKAGING		190	0.3336818	0.98224115	0.47021276	0.8757132	1.0	12612	tags=35%, list=23%, signal=46%
GO_VESICLE_MEDIATED_TRANSPORT_BETWEEN_ENDOSOMAL_COMPARTMENTS	GO_VESICLE_MEDIATED_TRANSPORT_BETWEEN_ENDOSOMAL_COMPARTMENTS		20	0.3327946	0.9817629	0.47244096	0.8763851	1.0	16118	tags=45%, list=30%, signal=64%
GO_CHAPERONE_MEDIATED_PROTEIN_FOLDING	GO_CHAPERONE_MEDIATED_PROTEIN_FOLDING		47	0.2988177	0.9812605	0.49250937	0.8771097	1.0	11844	tags=36%, list=22%, signal=46%
GO_PHOSPHATASE_REGULATOR_ACTIVITY	GO_PHOSPHATASE_REGULATOR_ACTIVITY		85	0.30655384	0.9803446	0.46930692	0.87921596	1.0	11514	tags=34%, list=21%, signal=43%
GO_MODULATION_OF_GROWTH_OF_SYMBIONT_INVOLVED_IN_INTERACTION_WITH_HOST	GO_MODULATION_OF_GROWTH_OF_SYMBIONT_INVOLVED_IN_INTERACTION_WITH_HOST		16	0.3716864	0.9796391	0.47420636	0.88060445	1.0	17047	tags=56%, list=31%, signal=82%
GO_UBIQUITIN_LIKE_PROTEIN_TRANSFERASE_ACTIVITY	GO_UBIQUITIN_LIKE_PROTEIN_TRANSFERASE_ACTIVITY		407	0.25843814	0.9790583	0.49209487	0.88164055	1.0	14348	tags=36%, list=26%, signal=49%
GO_OLIGOSACCHARIDE_LIPID_INTERMEDIATE_BIOSYNTHETIC_PROCESS	GO_OLIGOSACCHARIDE_LIPID_INTERMEDIATE_BIOSYNTHETIC_PROCESS		20	0.39232022	0.97867113	0.4969325	0.8819885	1.0	15692	tags=55%, list=29%, signal=77%
GO_CARBOXYLIC_ESTER_HYDROLASE_ACTIVITY	GO_CARBOXYLIC_ESTER_HYDROLASE_ACTIVITY		131	0.30791673	0.97823656	0.5	0.8824589	1.0	11211	tags=34%, list=21%, signal=42%
GO_REGULATION_OF_TRANSCRIPTION_FROM_RNA_POLYMERASE_I_PROMOTER	GO_REGULATION_OF_TRANSCRIPTION_FROM_RNA_POLYMERASE_I_PROMOTER		23	0.4126376	0.97800905	0.52191234	0.8822647	1.0	9330	tags=39%, list=17%, signal=47%
GO_REGULATION_OF_VACUOLE_ORGANIZATION	GO_REGULATION_OF_VACUOLE_ORGANIZATION		41	0.32886285	0.97585624	0.4845996	0.88850874	1.0	13474	tags=41%, list=25%, signal=55%
GO_CELLULAR_AMINO_ACID_METABOLIC_PROCESS	GO_CELLULAR_AMINO_ACID_METABOLIC_PROCESS		328	0.30083188	0.97568303	0.48176584	0.8881649	1.0	13607	tags=37%, list=25%, signal=49%
GO_PYRIDINE_NUCLEOTIDE_BIOSYNTHETIC_PROCESS	GO_PYRIDINE_NUCLEOTIDE_BIOSYNTHETIC_PROCESS		15	0.42692006	0.97517216	0.4923664	0.88883483	1.0	7753	tags=40%, list=14%, signal=47%
GO_ACTIVATION_OF_PROTEIN_KINASE_A_ACTIVITY	GO_ACTIVATION_OF_PROTEIN_KINASE_A_ACTIVITY		17	0.35717005	0.9740867	0.4943182	0.89143926	1.0	12401	tags=53%, list=23%, signal=69%
GO_PROTEIN_POLYUBIQUITINATION	GO_PROTEIN_POLYUBIQUITINATION		238	0.27387023	0.9738111	0.47140038	0.891448	1.0	13741	tags=36%, list=25%, signal=48%
GO_MODIFIED_AMINO_ACID_TRANSMEMBRANE_TRANSPORTER_ACTIVITY	GO_MODIFIED_AMINO_ACID_TRANSMEMBRANE_TRANSPORTER_ACTIVITY		16	0.3839502	0.9737439	0.4770459	0.8907655	1.0	11290	tags=44%, list=21%, signal=55%
GO_UBIQUITIN_LIKE_PROTEIN_BINDING	GO_UBIQUITIN_LIKE_PROTEIN_BINDING		117	0.29103082	0.97339237	0.4832347	0.89104545	1.0	10107	tags=26%, list=19%, signal=32%
GO_POSITIVE_REGULATION_OF_LIGASE_ACTIVITY	GO_POSITIVE_REGULATION_OF_LIGASE_ACTIVITY		108	0.32282513	0.9728129	0.47628865	0.89200675	1.0	15937	tags=45%, list=29%, signal=64%
GO_VENTRICULAR_SYSTEM_DEVELOPMENT	GO_VENTRICULAR_SYSTEM_DEVELOPMENT		26	0.3706452	0.97258145	0.50803214	0.8918469	1.0	16752	tags=54%, list=31%, signal=78%
GO_MHC_CLASS_II_PROTEIN_COMPLEX_BINDING	GO_MHC_CLASS_II_PROTEIN_COMPLEX_BINDING		15	0.42929295	0.97236437	0.49105367	0.89165574	1.0	14808	tags=73%, list=27%, signal=101%
GO_HSP70_PROTEIN_BINDING	GO_HSP70_PROTEIN_BINDING		30	0.3427769	0.9717565	0.47961167	0.89277565	1.0	13980	tags=43%, list=26%, signal=58%
GO_ESTROGEN_RECEPTOR_BINDING	GO_ESTROGEN_RECEPTOR_BINDING		39	0.33356977	0.9717032	0.486692	0.8920361	1.0	11627	tags=33%, list=21%, signal=42%
GO_WALKING_BEHAVIOR	GO_WALKING_BEHAVIOR		31	0.37532917	0.96959925	0.5029354	0.89800465	1.0	12794	tags=45%, list=24%, signal=59%
GO_PROTEIN_TETRAMERIZATION	GO_PROTEIN_TETRAMERIZATION		133	0.29278642	0.9693664	0.476	0.8978284	1.0	12612	tags=37%, list=23%, signal=48%
GO_MICROBODY	GO_MICROBODY		129	0.30141437	0.9686348	0.5108481	0.8993263	1.0	16754	tags=43%, list=31%, signal=63%
GO_OXYGEN_TRANSPORT	GO_OXYGEN_TRANSPORT		15	0.43738455	0.96781677	0.502947	0.90106577	1.0	7601	tags=27%, list=14%, signal=31%
GO_MEIOSIS_I	GO_MEIOSIS_I		84	0.31617862	0.9673854	0.49905482	0.9016329	1.0	13405	tags=38%, list=25%, signal=51%
GO_REGULATION_OF_CYTOKINESIS	GO_REGULATION_OF_CYTOKINESIS		63	0.30905753	0.9667707	0.501002	0.90273654	1.0	12255	tags=35%, list=23%, signal=45%
GO_CORE_PROMOTER_SEQUENCE_SPECIFIC_DNA_BINDING	GO_CORE_PROMOTER_SEQUENCE_SPECIFIC_DNA_BINDING		100	0.30535054	0.9664941	0.5135659	0.90268946	1.0	15183	tags=44%, list=28%, signal=61%
GO_REGULATION_OF_ERAD_PATHWAY	GO_REGULATION_OF_ERAD_PATHWAY		27	0.34983742	0.96630424	0.5058594	0.9023673	1.0	14469	tags=52%, list=27%, signal=71%
GO_REGULATION_OF_CHROMATIN_ORGANIZATION	GO_REGULATION_OF_CHROMATIN_ORGANIZATION		148	0.2988816	0.9654512	0.50666666	0.90416384	1.0	12616	tags=35%, list=23%, signal=46%
GO_NEGATIVE_REGULATION_OF_CYCLIN_DEPENDENT_PROTEIN_KINASE_ACTIVITY	GO_NEGATIVE_REGULATION_OF_CYCLIN_DEPENDENT_PROTEIN_KINASE_ACTIVITY		32	0.3079212	0.964911	0.53571427	0.90505934	1.0	11825	tags=38%, list=22%, signal=48%
GO_POSITIVE_REGULATION_OF_CELLULAR_AMIDE_METABOLIC_PROCESS	GO_POSITIVE_REGULATION_OF_CELLULAR_AMIDE_METABOLIC_PROCESS		105	0.27611348	0.96453625	0.53831774	0.90533	1.0	11444	tags=35%, list=21%, signal=45%
GO_EPITHELIAL_CILIUM_MOVEMENT	GO_EPITHELIAL_CILIUM_MOVEMENT		18	0.40295246	0.96401095	0.50199205	0.90611804	1.0	4227	tags=22%, list=8%, signal=24%
GO_PROTEIN_DNA_COMPLEX	GO_PROTEIN_DNA_COMPLEX		175	0.33216763	0.9638054	0.5031315	0.9058735	1.0	14435	tags=39%, list=27%, signal=54%
GO_FATTY_ACID_LIGASE_ACTIVITY	GO_FATTY_ACID_LIGASE_ACTIVITY		16	0.4378505	0.96324915	0.5108481	0.90678054	1.0	11488	tags=38%, list=21%, signal=48%
GO_POSITIVE_REGULATION_OF_PROTEIN_BINDING	GO_POSITIVE_REGULATION_OF_PROTEIN_BINDING		73	0.28305	0.9628005	0.536	0.9073686	1.0	8587	tags=25%, list=16%, signal=29%
GO_ESTABLISHMENT_OF_MITOTIC_SPINDLE_ORIENTATION	GO_ESTABLISHMENT_OF_MITOTIC_SPINDLE_ORIENTATION		19	0.3769591	0.9621834	0.49072164	0.9084504	1.0	10442	tags=37%, list=19%, signal=46%
GO_VIRAL_GENOME_REPLICATION	GO_VIRAL_GENOME_REPLICATION		20	0.35420004	0.9611392	0.5	0.91092217	1.0	3724	tags=20%, list=7%, signal=21%
GO_POSITIVE_T_CELL_SELECTION	GO_POSITIVE_T_CELL_SELECTION		21	0.34111884	0.9610971	0.5434343	0.91015446	1.0	10211	tags=38%, list=19%, signal=47%
GO_OXIDOREDUCTASE_ACTIVITY_OXIDIZING_METAL_IONS	GO_OXIDOREDUCTASE_ACTIVITY_OXIDIZING_METAL_IONS		18	0.38641992	0.9606758	0.48927876	0.91061246	1.0	15013	tags=50%, list=28%, signal=69%
GO_CYCLIN_DEPENDENT_PROTEIN_KINASE_HOLOENZYME_COMPLEX	GO_CYCLIN_DEPENDENT_PROTEIN_KINASE_HOLOENZYME_COMPLEX		31	0.33840266	0.960632	0.5189621	0.9098625	1.0	8500	tags=32%, list=16%, signal=38%
GO_COFACTOR_BINDING	GO_COFACTOR_BINDING		256	0.2958034	0.9605168	0.5065913	0.9093285	1.0	14883	tags=41%, list=27%, signal=56%
GO_MICROTUBULE_POLYMERIZATION	GO_MICROTUBULE_POLYMERIZATION		27	0.33142558	0.958914	0.4950495	0.9136948	1.0	8132	tags=30%, list=15%, signal=35%
GO_OXIDOREDUCTASE_ACTIVITY_ACTING_ON_CH_OH_GROUP_OF_DONORS	GO_OXIDOREDUCTASE_ACTIVITY_ACTING_ON_CH_OH_GROUP_OF_DONORS		132	0.33083162	0.95879257	0.5155642	0.91319674	1.0	12820	tags=34%, list=24%, signal=45%
GO_BODY_FLUID_SECRETION	GO_BODY_FLUID_SECRETION		71	0.28773406	0.9587059	0.54198474	0.912562	1.0	11975	tags=37%, list=22%, signal=47%
GO_NEGATIVE_REGULATION_OF_NUCLEAR_DIVISION	GO_NEGATIVE_REGULATION_OF_NUCLEAR_DIVISION		45	0.34573573	0.9583386	0.51158303	0.9128787	1.0	12023	tags=40%, list=22%, signal=51%
GO_POSITIVE_REGULATION_OF_PROTEIN_AUTOPHOSPHORYLATION	GO_POSITIVE_REGULATION_OF_PROTEIN_AUTOPHOSPHORYLATION		22	0.33988774	0.95833737	0.53333336	0.9119774	1.0	11385	tags=36%, list=21%, signal=46%
GO_PROTEIN_SELF_ASSOCIATION	GO_PROTEIN_SELF_ASSOCIATION		43	0.28755206	0.95745146	0.5601504	0.9139056	1.0	9028	tags=26%, list=17%, signal=31%
GO_REGULATION_OF_CHROMATIN_BINDING	GO_REGULATION_OF_CHROMATIN_BINDING		17	0.38528532	0.9557441	0.5221774	0.9185493	1.0	17229	tags=65%, list=32%, signal=95%
GO_ACID_THIOL_LIGASE_ACTIVITY	GO_ACID_THIOL_LIGASE_ACTIVITY		20	0.4429282	0.9554695	0.5481336	0.918544	1.0	10793	tags=35%, list=20%, signal=44%
GO_SOMITOGENESIS	GO_SOMITOGENESIS		62	0.3109644	0.9554539	0.5229885	0.9176844	1.0	7635	tags=29%, list=14%, signal=34%
GO_AXONEME_PART	GO_AXONEME_PART		22	0.36600125	0.95487654	0.50775194	0.9186534	1.0	10573	tags=36%, list=19%, signal=45%
GO_TRANSFERASE_ACTIVITY_TRANSFERRING_PENTOSYL_GROUPS	GO_TRANSFERASE_ACTIVITY_TRANSFERRING_PENTOSYL_GROUPS		55	0.32914627	0.95460236	0.5256917	0.9186139	1.0	11043	tags=35%, list=20%, signal=43%
GO_CIS_TRANS_ISOMERASE_ACTIVITY	GO_CIS_TRANS_ISOMERASE_ACTIVITY		45	0.30130258	0.9542396	0.5277247	0.9188972	1.0	14381	tags=40%, list=26%, signal=54%
GO_CELLULAR_COMPONENT_ASSEMBLY_INVOLVED_IN_MORPHOGENESIS	GO_CELLULAR_COMPONENT_ASSEMBLY_INVOLVED_IN_MORPHOGENESIS		233	0.30568016	0.954068	0.5030303	0.91853493	1.0	10762	tags=33%, list=20%, signal=41%
GO_MICROTUBULE_BASED_PROCESS	GO_MICROTUBULE_BASED_PROCESS		495	0.27814776	0.95356995	0.51282054	0.9192361	1.0	11017	tags=30%, list=20%, signal=37%
GO_SEGMENTATION	GO_SEGMENTATION		89	0.29727212	0.9533214	0.5256167	0.91912085	1.0	14346	tags=44%, list=26%, signal=59%
GO_MULTICELLULAR_ORGANISM_AGING	GO_MULTICELLULAR_ORGANISM_AGING		30	0.32188633	0.9532476	0.5390476	0.918445	1.0	9520	tags=30%, list=18%, signal=36%
GO_UBIQUITIN_LIGASE_COMPLEX	GO_UBIQUITIN_LIGASE_COMPLEX		255	0.2675142	0.9529297	0.52734375	0.918565	1.0	14348	tags=38%, list=26%, signal=52%
GO_ENTEROENDOCRINE_CELL_DIFFERENTIATION	GO_ENTEROENDOCRINE_CELL_DIFFERENTIATION		19	0.3835801	0.95291597	0.5135135	0.9177302	1.0	11987	tags=37%, list=22%, signal=47%
GO_PEPTIDYL_LYSINE_TRIMETHYLATION	GO_PEPTIDYL_LYSINE_TRIMETHYLATION		22	0.38440824	0.95281845	0.5228216	0.9171598	1.0	7886	tags=32%, list=15%, signal=37%
GO_NEGATIVE_REGULATION_OF_CELL_CYCLE_PHASE_TRANSITION	GO_NEGATIVE_REGULATION_OF_CELL_CYCLE_PHASE_TRANSITION		143	0.29203624	0.9524432	0.5234375	0.9174722	1.0	14113	tags=41%, list=26%, signal=56%
GO_PROTEIN_N_TERMINUS_BINDING	GO_PROTEIN_N_TERMINUS_BINDING		103	0.29151	0.95203525	0.527668	0.917913	1.0	15401	tags=45%, list=28%, signal=62%
GO_OXIDOREDUCTASE_ACTIVITY_ACTING_ON_THE_CH_OH_GROUP_OF_DONORS_NAD_OR_NADP_AS_ACCEPTOR	GO_OXIDOREDUCTASE_ACTIVITY_ACTING_ON_THE_CH_OH_GROUP_OF_DONORS_NAD_OR_NADP_AS_ACCEPTOR		111	0.33151275	0.9520197	0.52131784	0.9170689	1.0	12116	tags=33%, list=22%, signal=43%
GO_BLASTOCYST_FORMATION	GO_BLASTOCYST_FORMATION		30	0.34370914	0.9519402	0.55058366	0.9164113	1.0	4963	tags=27%, list=9%, signal=29%
GO_CHROMATIN_ASSEMBLY_OR_DISASSEMBLY	GO_CHROMATIN_ASSEMBLY_OR_DISASSEMBLY		174	0.3234572	0.9518711	0.5147059	0.9157448	1.0	13465	tags=39%, list=25%, signal=51%
GO_NEGATIVE_REGULATION_OF_ORGANELLE_ASSEMBLY	GO_NEGATIVE_REGULATION_OF_ORGANELLE_ASSEMBLY		22	0.33837605	0.95160186	0.5371094	0.91575843	1.0	9207	tags=32%, list=17%, signal=38%
GO_NUCLEAR_LOCALIZATION_SEQUENCE_BINDING	GO_NUCLEAR_LOCALIZATION_SEQUENCE_BINDING		21	0.38228104	0.951404	0.523614	0.91550905	1.0	13331	tags=48%, list=25%, signal=63%
GO_MACROMITOPHAGY	GO_MACROMITOPHAGY		130	0.25831488	0.9512381	0.5917969	0.9151009	1.0	12709	tags=37%, list=23%, signal=48%
GO_NEGATIVE_REGULATION_OF_TRANSFERASE_ACTIVITY	GO_NEGATIVE_REGULATION_OF_TRANSFERASE_ACTIVITY		344	0.25093552	0.95107865	0.5480769	0.9147211	1.0	13746	tags=38%, list=25%, signal=50%
GO_ANATOMICAL_STRUCTURE_HOMEOSTASIS	GO_ANATOMICAL_STRUCTURE_HOMEOSTASIS		284	0.2496465	0.9499558	0.58778626	0.91725165	1.0	12148	tags=31%, list=22%, signal=39%
GO_GLUCOSAMINE_CONTAINING_COMPOUND_METABOLIC_PROCESS	GO_GLUCOSAMINE_CONTAINING_COMPOUND_METABOLIC_PROCESS		26	0.33975458	0.94830656	0.48995984	0.9217526	1.0	2222	tags=19%, list=4%, signal=20%
GO_POSITIVE_REGULATION_OF_INSULIN_SECRETION_INVOLVED_IN_CELLULAR_RESPONSE_TO_GLUCOSE_STIMULUS	GO_POSITIVE_REGULATION_OF_INSULIN_SECRETION_INVOLVED_IN_CELLULAR_RESPONSE_TO_GLUCOSE_STIMULUS		26	0.35986054	0.9481433	0.52854514	0.92139024	1.0	9593	tags=35%, list=18%, signal=42%
GO_AXONAL_FASCICULATION	GO_AXONAL_FASCICULATION		20	0.34589586	0.94703305	0.55424064	0.9240045	1.0	8191	tags=25%, list=15%, signal=29%
GO_RAB_GUANYL_NUCLEOTIDE_EXCHANGE_FACTOR_ACTIVITY	GO_RAB_GUANYL_NUCLEOTIDE_EXCHANGE_FACTOR_ACTIVITY		28	0.34811407	0.94631374	0.5096899	0.9254067	1.0	11169	tags=39%, list=21%, signal=49%
GO_ORGANIC_ACID_TRANSMEMBRANE_TRANSPORT	GO_ORGANIC_ACID_TRANSMEMBRANE_TRANSPORT		100	0.308562	0.94614756	0.55813956	0.92506206	1.0	10129	tags=34%, list=19%, signal=42%
GO_MYELOID_DENDRITIC_CELL_ACTIVATION	GO_MYELOID_DENDRITIC_CELL_ACTIVATION		25	0.32613593	0.9461388	0.5846154	0.92420685	1.0	6910	tags=28%, list=13%, signal=32%
GO_MEMBRANE_DOCKING	GO_MEMBRANE_DOCKING		66	0.30184442	0.9460923	0.53501946	0.9234753	1.0	14356	tags=44%, list=26%, signal=60%
GO_TRANSCRIPTIONALLY_ACTIVE_CHROMATIN	GO_TRANSCRIPTIONALLY_ACTIVE_CHROMATIN		21	0.34652734	0.94594294	0.5364891	0.92310244	1.0	16669	tags=57%, list=31%, signal=82%
GO_PIRNA_METABOLIC_PROCESS	GO_PIRNA_METABOLIC_PROCESS		15	0.4135759	0.9455789	0.528757	0.92337424	1.0	14166	tags=53%, list=26%, signal=72%
GO_NITROGEN_CYCLE_METABOLIC_PROCESS	GO_NITROGEN_CYCLE_METABOLIC_PROCESS		15	0.4115923	0.94549644	0.5435606	0.9227293	1.0	13554	tags=47%, list=25%, signal=62%
GO_MONOSACCHARIDE_BIOSYNTHETIC_PROCESS	GO_MONOSACCHARIDE_BIOSYNTHETIC_PROCESS		53	0.33593675	0.94496703	0.5274262	0.9235453	1.0	17346	tags=53%, list=32%, signal=78%
GO_PROTEIN_O_LINKED_MANNOSYLATION	GO_PROTEIN_O_LINKED_MANNOSYLATION		15	0.3607845	0.94491816	0.5346535	0.9228449	1.0	2869	tags=20%, list=5%, signal=21%
GO_SYNAPTIC_VESICLE_CYCLE	GO_SYNAPTIC_VESICLE_CYCLE		87	0.30431414	0.94484043	0.5546875	0.9221953	1.0	10394	tags=32%, list=19%, signal=40%
GO_CENTROSOME_DUPLICATION	GO_CENTROSOME_DUPLICATION		32	0.34125623	0.944715	0.51663405	0.92171335	1.0	9844	tags=31%, list=18%, signal=38%
GO_RESPONSE_TO_GLUCAGON	GO_RESPONSE_TO_GLUCAGON		48	0.3005905	0.9442353	0.5502846	0.92241657	1.0	12401	tags=42%, list=23%, signal=54%
GO_REGULATION_OF_DNA_BINDING	GO_REGULATION_OF_DNA_BINDING		93	0.2816488	0.9441725	0.5846154	0.9217424	1.0	8182	tags=27%, list=15%, signal=32%
GO_REGULATION_OF_TOR_SIGNALING	GO_REGULATION_OF_TOR_SIGNALING		66	0.28617063	0.9441657	0.5731463	0.9208875	1.0	16443	tags=42%, list=30%, signal=61%
GO_CHROMATIN_BINDING	GO_CHROMATIN_BINDING		424	0.2874136	0.94400126	0.5191571	0.92053634	1.0	15488	tags=42%, list=29%, signal=58%
GO_REGULATION_OF_ACTIN_NUCLEATION	GO_REGULATION_OF_ACTIN_NUCLEATION		27	0.31804818	0.9434971	0.54633206	0.9212203	1.0	13047	tags=41%, list=24%, signal=54%
GO_PYRIDINE_CONTAINING_COMPOUND_BIOSYNTHETIC_PROCESS	GO_PYRIDINE_CONTAINING_COMPOUND_BIOSYNTHETIC_PROCESS		19	0.40914336	0.9428134	0.53294575	0.9224851	1.0	7753	tags=37%, list=14%, signal=43%
GO_POSITIVE_REGULATION_OF_MRNA_3_END_PROCESSING	GO_POSITIVE_REGULATION_OF_MRNA_3_END_PROCESSING		16	0.41137055	0.9416086	0.54048586	0.9254009	1.0	10374	tags=38%, list=19%, signal=46%
GO_REGULATION_OF_MICROTUBULE_POLYMERIZATION_OR_DEPOLYMERIZATION	GO_REGULATION_OF_MICROTUBULE_POLYMERIZATION_OR_DEPOLYMERIZATION		171	0.30052698	0.94150555	0.5202429	0.92483765	1.0	11017	tags=33%, list=20%, signal=41%
GO_POSITIVE_REGULATION_OF_MITOTIC_CELL_CYCLE	GO_POSITIVE_REGULATION_OF_MITOTIC_CELL_CYCLE		122	0.2902899	0.941213	0.5313093	0.92487574	1.0	13476	tags=39%, list=25%, signal=52%
GO_REGULATION_OF_FATTY_ACID_BIOSYNTHETIC_PROCESS	GO_REGULATION_OF_FATTY_ACID_BIOSYNTHETIC_PROCESS		35	0.33781344	0.940916	0.5288641	0.9249548	1.0	7945	tags=29%, list=15%, signal=33%
GO_POSITIVE_REGULATION_OF_TRANSLATIONAL_INITIATION	GO_POSITIVE_REGULATION_OF_TRANSLATIONAL_INITIATION		22	0.35372058	0.9408357	0.5122449	0.92433834	1.0	4056	tags=23%, list=7%, signal=25%
GO_MEDIATOR_COMPLEX	GO_MEDIATOR_COMPLEX		34	0.35115018	0.9404335	0.5548902	0.92470956	1.0	12461	tags=38%, list=23%, signal=50%
GO_PHOSPHATIDYLINOSITOL_PHOSPHATE_KINASE_ACTIVITY	GO_PHOSPHATIDYLINOSITOL_PHOSPHATE_KINASE_ACTIVITY		16	0.34560752	0.94022197	0.5320911	0.924515	1.0	12590	tags=50%, list=23%, signal=65%
GO_DNA_MODIFICATION	GO_DNA_MODIFICATION		77	0.31810606	0.939961	0.5155642	0.92443126	1.0	11002	tags=32%, list=20%, signal=41%
GO_INTRACELLULAR_RECEPTOR_SIGNALING_PATHWAY	GO_INTRACELLULAR_RECEPTOR_SIGNALING_PATHWAY		166	0.2517856	0.9395992	0.61702126	0.92469186	1.0	11914	tags=30%, list=22%, signal=38%
GO_TRANSCRIPTION_COREPRESSOR_ACTIVITY	GO_TRANSCRIPTION_COREPRESSOR_ACTIVITY		218	0.25890648	0.93936694	0.57225436	0.92457294	1.0	14554	tags=39%, list=27%, signal=53%
GO_LIPID_TRANSPORTER_ACTIVITY	GO_LIPID_TRANSPORTER_ACTIVITY		106	0.29739586	0.93872833	0.5635359	0.92575026	1.0	10233	tags=29%, list=19%, signal=36%
GO_NITROGEN_COMPOUND_TRANSPORT	GO_NITROGEN_COMPOUND_TRANSPORT		496	0.2581669	0.9385943	0.58601135	0.925261	1.0	12007	tags=33%, list=22%, signal=42%
GO_RHYTHMIC_BEHAVIOR	GO_RHYTHMIC_BEHAVIOR		19	0.33016685	0.9384246	0.574	0.9249523	1.0	9028	tags=32%, list=17%, signal=38%
GO_TRANSCRIPTION_COACTIVATOR_ACTIVITY	GO_TRANSCRIPTION_COACTIVATOR_ACTIVITY		293	0.2708577	0.9383168	0.55728155	0.92441183	1.0	12772	tags=33%, list=24%, signal=43%
GO_NEGATIVE_REGULATION_OF_MULTI_ORGANISM_PROCESS	GO_NEGATIVE_REGULATION_OF_MULTI_ORGANISM_PROCESS		148	0.29744866	0.9373155	0.5976096	0.9266007	1.0	10950	tags=32%, list=20%, signal=40%
GO_CELLULAR_CARBOHYDRATE_CATABOLIC_PROCESS	GO_CELLULAR_CARBOHYDRATE_CATABOLIC_PROCESS		31	0.32003513	0.9372749	0.55424064	0.9258654	1.0	11951	tags=39%, list=22%, signal=50%
GO_NUCLEAR_TRANSCRIBED_MRNA_POLY_A_TAIL_SHORTENING	GO_NUCLEAR_TRANSCRIBED_MRNA_POLY_A_TAIL_SHORTENING		24	0.37597454	0.93717396	0.5436508	0.9253098	1.0	9928	tags=38%, list=18%, signal=46%
GO_CHROMATIN	GO_CHROMATIN		436	0.28318384	0.9370804	0.52952754	0.9247463	1.0	15304	tags=40%, list=28%, signal=55%
GO_INORGANIC_ANION_EXCHANGER_ACTIVITY	GO_INORGANIC_ANION_EXCHANGER_ACTIVITY		21	0.3506112	0.9370776	0.53424656	0.92389727	1.0	7047	tags=29%, list=13%, signal=33%
GO_ORGANOPHOSPHATE_ESTER_TRANSPORT	GO_ORGANOPHOSPHATE_ESTER_TRANSPORT		88	0.28469583	0.936537	0.5684411	0.9248072	1.0	10397	tags=27%, list=19%, signal=34%
GO_HIPPOCAMPUS_DEVELOPMENT	GO_HIPPOCAMPUS_DEVELOPMENT		73	0.29558197	0.9357482	0.58429116	0.9264256	1.0	12163	tags=37%, list=22%, signal=48%
GO_REGULATION_OF_INTRACELLULAR_STEROID_HORMONE_RECEPTOR_SIGNALING_PATHWAY	GO_REGULATION_OF_INTRACELLULAR_STEROID_HORMONE_RECEPTOR_SIGNALING_PATHWAY		57	0.3012007	0.93555176	0.56177604	0.9261998	1.0	11268	tags=39%, list=21%, signal=49%
GO_RESPONSE_TO_INCREASED_OXYGEN_LEVELS	GO_RESPONSE_TO_INCREASED_OXYGEN_LEVELS		23	0.3393728	0.93534636	0.5647059	0.9259968	1.0	12608	tags=35%, list=23%, signal=45%
GO_CELLULAR_RESPONSE_TO_OSMOTIC_STRESS	GO_CELLULAR_RESPONSE_TO_OSMOTIC_STRESS		20	0.33589295	0.93499106	0.55323195	0.92624503	1.0	13286	tags=45%, list=24%, signal=60%
GO_REGULATION_OF_T_HELPER_1_TYPE_IMMUNE_RESPONSE	GO_REGULATION_OF_T_HELPER_1_TYPE_IMMUNE_RESPONSE		22	0.34664026	0.93417907	0.56215215	0.9278734	1.0	14046	tags=36%, list=26%, signal=49%
GO_GTP_DEPENDENT_PROTEIN_BINDING	GO_GTP_DEPENDENT_PROTEIN_BINDING		17	0.35730964	0.93382835	0.54894435	0.9281273	1.0	13213	tags=53%, list=24%, signal=70%
GO_EPITHELIAL_STRUCTURE_MAINTENANCE	GO_EPITHELIAL_STRUCTURE_MAINTENANCE		21	0.34005743	0.93355954	0.5566219	0.9281702	1.0	9517	tags=29%, list=18%, signal=35%
GO_PROTEIN_LOCALIZATION_TO_MITOCHONDRION	GO_PROTEIN_LOCALIZATION_TO_MITOCHONDRION		65	0.29950842	0.9333072	0.55765593	0.9281039	1.0	10282	tags=29%, list=19%, signal=36%
GO_NUCLEOSIDE_TRIPHOSPHATASE_REGULATOR_ACTIVITY	GO_NUCLEOSIDE_TRIPHOSPHATASE_REGULATOR_ACTIVITY		326	0.25935793	0.9327043	0.5833333	0.9291023	1.0	13053	tags=36%, list=24%, signal=47%
GO_REGULATION_OF_TRANSCRIPTION_INITIATION_FROM_RNA_POLYMERASE_II_PROMOTER	GO_REGULATION_OF_TRANSCRIPTION_INITIATION_FROM_RNA_POLYMERASE_II_PROMOTER		23	0.36637303	0.93245494	0.5264188	0.9290172	1.0	13603	tags=48%, list=25%, signal=64%
GO_POSITIVE_REGULATION_OF_PROTEIN_MODIFICATION_BY_SMALL_PROTEIN_CONJUGATION_OR_REMOVAL	GO_POSITIVE_REGULATION_OF_PROTEIN_MODIFICATION_BY_SMALL_PROTEIN_CONJUGATION_OR_REMOVAL		191	0.273572	0.93198276	0.5294118	0.9295843	1.0	15952	tags=43%, list=29%, signal=61%
GO_PHOSPHATIDYLINOSITOL_PHOSPHATE_BINDING	GO_PHOSPHATIDYLINOSITOL_PHOSPHATE_BINDING		112	0.2734126	0.93135506	0.57833654	0.9307369	1.0	14445	tags=38%, list=27%, signal=52%
GO_ATPASE_BINDING	GO_ATPASE_BINDING		75	0.26564705	0.9310811	0.5947955	0.9307604	1.0	7516	tags=24%, list=14%, signal=28%
GO_PROTEIN_OLIGOMERIZATION	GO_PROTEIN_OLIGOMERIZATION		426	0.2423162	0.93020046	0.6302682	0.9326803	1.0	11033	tags=28%, list=20%, signal=35%
GO_POSITIVE_REGULATION_OF_INSULIN_SECRETION	GO_POSITIVE_REGULATION_OF_INSULIN_SECRETION		62	0.29924074	0.92931354	0.57486135	0.93463284	1.0	10189	tags=32%, list=19%, signal=40%
GO_REGULATION_OF_MAMMARY_GLAND_EPITHELIAL_CELL_PROLIFERATION	GO_REGULATION_OF_MAMMARY_GLAND_EPITHELIAL_CELL_PROLIFERATION		16	0.38372603	0.92888707	0.5734127	0.93507093	1.0	17285	tags=69%, list=32%, signal=101%
GO_RESPONSE_TO_TEMPERATURE_STIMULUS	GO_RESPONSE_TO_TEMPERATURE_STIMULUS		145	0.26076305	0.92870116	0.61141807	0.9347958	1.0	9646	tags=28%, list=18%, signal=33%
GO_MICROTUBULE_BUNDLE_FORMATION	GO_MICROTUBULE_BUNDLE_FORMATION		60	0.30509114	0.92774755	0.564257	0.937024	1.0	7699	tags=23%, list=14%, signal=27%
GO_APICAL_JUNCTION_ASSEMBLY	GO_APICAL_JUNCTION_ASSEMBLY		40	0.3295443	0.927664	0.5473485	0.93642944	1.0	9517	tags=30%, list=18%, signal=36%
GO_NEGATIVE_REGULATION_OF_TRANSLATIONAL_INITIATION	GO_NEGATIVE_REGULATION_OF_TRANSLATIONAL_INITIATION		20	0.3404748	0.92730266	0.5869565	0.93669754	1.0	11710	tags=45%, list=22%, signal=57%
GO_NUCLEOSIDE_BISPHOSPHATE_METABOLIC_PROCESS	GO_NUCLEOSIDE_BISPHOSPHATE_METABOLIC_PROCESS		37	0.3332084	0.9266309	0.5536398	0.937918	1.0	13463	tags=35%, list=25%, signal=47%
GO_RNA_POLYMERASE_II_CORE_PROMOTER_SEQUENCE_SPECIFIC_DNA_BINDING	GO_RNA_POLYMERASE_II_CORE_PROMOTER_SEQUENCE_SPECIFIC_DNA_BINDING		53	0.29777518	0.92657965	0.5687732	0.9372189	1.0	16586	tags=49%, list=31%, signal=71%
GO_OXIDOREDUCTASE_ACTIVITY_ACTING_ON_PEROXIDE_AS_ACCEPTOR	GO_OXIDOREDUCTASE_ACTIVITY_ACTING_ON_PEROXIDE_AS_ACCEPTOR		41	0.31142157	0.9262677	0.6105675	0.937347	1.0	8036	tags=29%, list=15%, signal=34%
GO_REGULATION_OF_COFACTOR_METABOLIC_PROCESS	GO_REGULATION_OF_COFACTOR_METABOLIC_PROCESS		49	0.30115786	0.92521274	0.5779093	0.93977123	1.0	12167	tags=37%, list=22%, signal=47%
GO_HISTONE_METHYLATION	GO_HISTONE_METHYLATION		78	0.3347393	0.9245575	0.5764706	0.94095725	1.0	11937	tags=40%, list=22%, signal=51%
GO_MALE_GAMETE_GENERATION	GO_MALE_GAMETE_GENERATION		455	0.2387242	0.92454433	0.6967871	0.9401378	1.0	11560	tags=27%, list=21%, signal=35%
GO_CONDENSED_NUCLEAR_CHROMOSOME	GO_CONDENSED_NUCLEAR_CHROMOSOME		83	0.31432512	0.92367154	0.5553435	0.9420372	1.0	15597	tags=53%, list=29%, signal=74%
GO_REGULATION_OF_KERATINOCYTE_DIFFERENTIATION	GO_REGULATION_OF_KERATINOCYTE_DIFFERENTIATION		26	0.35151795	0.9235987	0.60285133	0.9414192	1.0	14151	tags=50%, list=26%, signal=68%
GO_NEGATIVE_REGULATION_OF_DNA_RECOMBINATION	GO_NEGATIVE_REGULATION_OF_DNA_RECOMBINATION		15	0.417522	0.9235747	0.5598377	0.9406507	1.0	7502	tags=27%, list=14%, signal=31%
GO_TUMOR_NECROSIS_FACTOR_RECEPTOR_BINDING	GO_TUMOR_NECROSIS_FACTOR_RECEPTOR_BINDING		30	0.3456343	0.92341155	0.5714286	0.940325	1.0	17194	tags=60%, list=32%, signal=88%
GO_POSITIVE_REGULATION_OF_INTERFERON_BETA_PRODUCTION	GO_POSITIVE_REGULATION_OF_INTERFERON_BETA_PRODUCTION		30	0.3387541	0.9233736	0.56421053	0.93958867	1.0	16363	tags=57%, list=30%, signal=81%
GO_POSITIVE_REGULATION_OF_HEART_CONTRACTION	GO_POSITIVE_REGULATION_OF_HEART_CONTRACTION		35	0.31320414	0.92269	0.6042471	0.9408679	1.0	8290	tags=34%, list=15%, signal=40%
GO_PHOSPHATIDYLINOSITOL_BINDING	GO_PHOSPHATIDYLINOSITOL_BINDING		193	0.25418732	0.922324	0.6484848	0.9411497	1.0	13907	tags=36%, list=26%, signal=49%
GO_PROTEIN_TRIMERIZATION	GO_PROTEIN_TRIMERIZATION		39	0.2959884	0.92161644	0.59344894	0.94254696	1.0	8701	tags=28%, list=16%, signal=34%
GO_GENE_SILENCING	GO_GENE_SILENCING		202	0.3014409	0.9214136	0.55009824	0.9423337	1.0	12612	tags=32%, list=23%, signal=42%
GO_PROTEIN_SERINE_THREONINE_KINASE_INHIBITOR_ACTIVITY	GO_PROTEIN_SERINE_THREONINE_KINASE_INHIBITOR_ACTIVITY		30	0.32339168	0.9212038	0.56777996	0.9421757	1.0	17352	tags=70%, list=32%, signal=103%
GO_SIGNAL_TRANSDUCTION_BY_P53_CLASS_MEDIATOR	GO_SIGNAL_TRANSDUCTION_BY_P53_CLASS_MEDIATOR		124	0.28385442	0.9210424	0.5700389	0.94183177	1.0	11580	tags=31%, list=21%, signal=39%
GO_UBIQUITIN_LIKE_PROTEIN_LIGASE_BINDING	GO_UBIQUITIN_LIKE_PROTEIN_LIGASE_BINDING		262	0.24920091	0.920778	0.5948617	0.94178593	1.0	13476	tags=34%, list=25%, signal=45%
GO_REGULATION_OF_T_CELL_CYTOKINE_PRODUCTION	GO_REGULATION_OF_T_CELL_CYTOKINE_PRODUCTION		22	0.3399666	0.9204421	0.58317024	0.9419355	1.0	7371	tags=32%, list=14%, signal=37%
GO_CILIARY_PART	GO_CILIARY_PART		294	0.2789818	0.92041487	0.574	0.9411732	1.0	12049	tags=32%, list=22%, signal=40%
GO_RESPONSE_TO_INTERLEUKIN_4	GO_RESPONSE_TO_INTERLEUKIN_4		30	0.32652873	0.9196137	0.56782943	0.94291145	1.0	16011	tags=40%, list=30%, signal=57%
GO_CILIARY_TIP	GO_CILIARY_TIP		43	0.36912897	0.9190538	0.5355731	0.94377095	1.0	15014	tags=49%, list=28%, signal=67%
GO_NEGATIVE_REGULATION_OF_SEQUENCE_SPECIFIC_DNA_BINDING_TRANSCRIPTION_FACTOR_ACTIVITY	GO_NEGATIVE_REGULATION_OF_SEQUENCE_SPECIFIC_DNA_BINDING_TRANSCRIPTION_FACTOR_ACTIVITY		133	0.24759603	0.9173599	0.6962963	0.948174	1.0	10286	tags=26%, list=19%, signal=32%
GO_AMINO_ACID_TRANSMEMBRANE_TRANSPORT	GO_AMINO_ACID_TRANSMEMBRANE_TRANSPORT		66	0.313018	0.91732514	0.5819209	0.9474313	1.0	10129	tags=35%, list=19%, signal=43%
GO_NEURON_APOPTOTIC_PROCESS	GO_NEURON_APOPTOTIC_PROCESS		35	0.31189814	0.9163098	0.5992063	0.9497132	1.0	13476	tags=49%, list=25%, signal=65%
GO_DNA_CATABOLIC_PROCESS	GO_DNA_CATABOLIC_PROCESS		27	0.33046705	0.9162016	0.5750988	0.9492239	1.0	16133	tags=48%, list=30%, signal=68%
GO_DEFENSE_RESPONSE_TO_VIRUS	GO_DEFENSE_RESPONSE_TO_VIRUS		160	0.33167168	0.9161086	0.6201232	0.94866467	1.0	10950	tags=31%, list=20%, signal=39%
GO_PROTEIN_UBIQUITINATION_INVOLVED_IN_UBIQUITIN_DEPENDENT_PROTEIN_CATABOLIC_PROCESS	GO_PROTEIN_UBIQUITINATION_INVOLVED_IN_UBIQUITIN_DEPENDENT_PROTEIN_CATABOLIC_PROCESS		130	0.25497913	0.9157878	0.6215686	0.94881386	1.0	15447	tags=39%, list=28%, signal=55%
GO_PROTEIN_TARGETING_TO_MITOCHONDRION	GO_PROTEIN_TARGETING_TO_MITOCHONDRION		48	0.3291946	0.91569793	0.58674467	0.948244	1.0	10282	tags=31%, list=19%, signal=39%
GO_MATURE_B_CELL_DIFFERENTIATION	GO_MATURE_B_CELL_DIFFERENTIATION		17	0.34221762	0.91549325	0.5719697	0.94801694	1.0	20514	tags=65%, list=38%, signal=104%
GO_PHOSPHOLIPID_TRANSPORT	GO_PHOSPHOLIPID_TRANSPORT		57	0.286519	0.9147939	0.61466163	0.9492842	1.0	7492	tags=23%, list=14%, signal=26%
GO_NEGATIVE_REGULATION_OF_CD4_POSITIVE_ALPHA_BETA_T_CELL_ACTIVATION	GO_NEGATIVE_REGULATION_OF_CD4_POSITIVE_ALPHA_BETA_T_CELL_ACTIVATION		15	0.32892066	0.9147458	0.5915493	0.9486111	1.0	15111	tags=40%, list=28%, signal=55%
GO_MICROBODY_PART	GO_MICROBODY_PART		93	0.296039	0.9145836	0.58914727	0.9482376	1.0	12675	tags=32%, list=23%, signal=42%
GO_MICROTUBULE_BASED_MOVEMENT	GO_MICROTUBULE_BASED_MOVEMENT		198	0.28812328	0.9138387	0.5731707	0.94968325	1.0	15558	tags=43%, list=29%, signal=61%
GO_CORTICAL_CYTOSKELETON_ORGANIZATION	GO_CORTICAL_CYTOSKELETON_ORGANIZATION		35	0.30406895	0.91356957	0.5925926	0.9497091	1.0	13377	tags=37%, list=25%, signal=49%
GO_HYDROGEN_PEROXIDE_CATABOLIC_PROCESS	GO_HYDROGEN_PEROXIDE_CATABOLIC_PROCESS		20	0.34925225	0.9129876	0.63257575	0.95067793	1.0	11970	tags=40%, list=22%, signal=51%
GO_SIGNAL_SEQUENCE_BINDING	GO_SIGNAL_SEQUENCE_BINDING		39	0.304646	0.91203606	0.58787876	0.95274866	1.0	5458	tags=23%, list=10%, signal=26%
GO_NEGATIVE_REGULATION_OF_PROTEIN_KINASE_B_SIGNALING	GO_NEGATIVE_REGULATION_OF_PROTEIN_KINASE_B_SIGNALING		35	0.29673314	0.9120153	0.64727956	0.95195764	1.0	13157	tags=43%, list=24%, signal=57%
GO_POTASSIUM_CHANNEL_REGULATOR_ACTIVITY	GO_POTASSIUM_CHANNEL_REGULATOR_ACTIVITY		44	0.30620357	0.9117883	0.6188605	0.95181704	1.0	10079	tags=34%, list=19%, signal=42%
GO_GTP_RHO_BINDING	GO_GTP_RHO_BINDING		16	0.39144108	0.91160554	0.56640625	0.95156956	1.0	15386	tags=56%, list=28%, signal=78%
GO_NEPHRON_TUBULE_FORMATION	GO_NEPHRON_TUBULE_FORMATION		18	0.36382508	0.91139346	0.6061706	0.9513801	1.0	15816	tags=61%, list=29%, signal=86%
GO_REGULATION_OF_MITOCHONDRIAL_MEMBRANE_PERMEABILITY_INVOLVED_IN_APOPTOTIC_PROCESS	GO_REGULATION_OF_MITOCHONDRIAL_MEMBRANE_PERMEABILITY_INVOLVED_IN_APOPTOTIC_PROCESS		22	0.33894354	0.91120577	0.59638554	0.9511352	1.0	9869	tags=32%, list=18%, signal=39%
GO_NUCLEOTIDE_TRANSPORT	GO_NUCLEOTIDE_TRANSPORT		25	0.34431586	0.9110606	0.598778	0.95071846	1.0	14507	tags=44%, list=27%, signal=60%
GO_CELL_ACTIVATION_INVOLVED_IN_IMMUNE_RESPONSE	GO_CELL_ACTIVATION_INVOLVED_IN_IMMUNE_RESPONSE		139	0.25414464	0.9110272	0.7109827	0.95000196	1.0	10293	tags=26%, list=19%, signal=32%
GO_NEGATIVE_REGULATION_OF_MITOTIC_CELL_CYCLE	GO_NEGATIVE_REGULATION_OF_MITOTIC_CELL_CYCLE		191	0.27372813	0.9110113	0.58203125	0.9492144	1.0	12023	tags=32%, list=22%, signal=41%
GO_CYTOKINESIS	GO_CYTOKINESIS		81	0.28736842	0.9103411	0.5685885	0.9504147	1.0	16752	tags=44%, list=31%, signal=64%
GO_REGULATION_OF_SPINDLE_ORGANIZATION	GO_REGULATION_OF_SPINDLE_ORGANIZATION		19	0.3509597	0.9101766	0.5921569	0.95008963	1.0	17955	tags=58%, list=33%, signal=86%
GO_LYMPHOCYTE_MIGRATION	GO_LYMPHOCYTE_MIGRATION		49	0.30519104	0.9097569	0.6490196	0.95056677	1.0	8600	tags=27%, list=16%, signal=31%
GO_CULLIN_RING_UBIQUITIN_LIGASE_COMPLEX	GO_CULLIN_RING_UBIQUITIN_LIGASE_COMPLEX		144	0.26448503	0.9097111	0.57389635	0.9498954	1.0	13622	tags=37%, list=25%, signal=49%
GO_MULTICELLULAR_ORGANISMAL_MOVEMENT	GO_MULTICELLULAR_ORGANISMAL_MOVEMENT		41	0.29852188	0.90921897	0.5974499	0.9505344	1.0	8290	tags=27%, list=15%, signal=32%
GO_PROTEIN_DEPHOSPHORYLATION	GO_PROTEIN_DEPHOSPHORYLATION		188	0.25515488	0.90910196	0.6720648	0.9500735	1.0	13650	tags=34%, list=25%, signal=45%
GO_REGULATION_OF_AUTOPHAGY	GO_REGULATION_OF_AUTOPHAGY		246	0.2584644	0.9090678	0.62450594	0.9493498	1.0	9870	tags=26%, list=18%, signal=32%
GO_NEGATIVE_REGULATION_OF_CHROMATIN_MODIFICATION	GO_NEGATIVE_REGULATION_OF_CHROMATIN_MODIFICATION		45	0.3287617	0.90867263	0.57418114	0.94971395	1.0	12616	tags=38%, list=23%, signal=49%
GO_ALPHA_AMINO_ACID_BIOSYNTHETIC_PROCESS	GO_ALPHA_AMINO_ACID_BIOSYNTHETIC_PROCESS		77	0.30877474	0.9082126	0.59090906	0.9503164	1.0	8349	tags=25%, list=15%, signal=29%
GO_AMINO_SUGAR_METABOLIC_PROCESS	GO_AMINO_SUGAR_METABOLIC_PROCESS		40	0.29655078	0.9075372	0.588	0.9515963	1.0	2222	tags=18%, list=4%, signal=18%
GO_CALCIUM_ION_REGULATED_EXOCYTOSIS	GO_CALCIUM_ION_REGULATED_EXOCYTOSIS		76	0.29510787	0.90713155	0.6456693	0.9519906	1.0	10394	tags=32%, list=19%, signal=39%
GO_HISTONE_METHYLTRANSFERASE_ACTIVITY	GO_HISTONE_METHYLTRANSFERASE_ACTIVITY		53	0.34136492	0.906957	0.58300394	0.95167804	1.0	11296	tags=40%, list=21%, signal=50%
GO_POSITIVE_REGULATION_OF_MULTI_ORGANISM_PROCESS	GO_POSITIVE_REGULATION_OF_MULTI_ORGANISM_PROCESS		151	0.25984085	0.9069178	0.63706565	0.95096344	1.0	10652	tags=30%, list=20%, signal=37%
GO_KINESIN_COMPLEX	GO_KINESIN_COMPLEX		54	0.30268657	0.9069104	0.5841785	0.95016277	1.0	17797	tags=52%, list=33%, signal=77%
GO_POSITIVE_REGULATION_OF_CELLULAR_PROTEIN_LOCALIZATION	GO_POSITIVE_REGULATION_OF_CELLULAR_PROTEIN_LOCALIZATION		350	0.23706275	0.90592444	0.7013233	0.9523529	1.0	11987	tags=29%, list=22%, signal=38%
GO_MYELOID_DENDRITIC_CELL_DIFFERENTIATION	GO_MYELOID_DENDRITIC_CELL_DIFFERENTIATION		19	0.3343561	0.90442055	0.63461536	0.9560876	1.0	6910	tags=26%, list=13%, signal=30%
GO_NEGATIVE_REGULATION_OF_BINDING	GO_NEGATIVE_REGULATION_OF_BINDING		130	0.24866244	0.9042143	0.7128713	0.95588106	1.0	11708	tags=34%, list=22%, signal=43%
GO_GLYCEROLIPID_BIOSYNTHETIC_PROCESS	GO_GLYCEROLIPID_BIOSYNTHETIC_PROCESS		208	0.25284162	0.9039536	0.66982925	0.9558269	1.0	11269	tags=31%, list=21%, signal=39%
GO_MICROTUBULE	GO_MICROTUBULE		392	0.25494468	0.9022694	0.6208252	0.960284	1.0	16456	tags=44%, list=30%, signal=63%
GO_TRANSCRIPTION_INITIATION_FROM_RNA_POLYMERASE_II_PROMOTER	GO_TRANSCRIPTION_INITIATION_FROM_RNA_POLYMERASE_II_PROMOTER		151	0.2622471	0.90197337	0.6588694	0.96034235	1.0	13046	tags=34%, list=24%, signal=45%
GO_MICROTUBULE_POLYMERIZATION_OR_DEPOLYMERIZATION	GO_MICROTUBULE_POLYMERIZATION_OR_DEPOLYMERIZATION		40	0.31076106	0.9018388	0.6	0.95990574	1.0	10079	tags=35%, list=19%, signal=43%
GO_SPERM_MOTILITY	GO_SPERM_MOTILITY		44	0.3012151	0.90022504	0.65050507	0.9640346	1.0	13323	tags=41%, list=25%, signal=54%
GO_NEGATIVE_REGULATION_OF_RESPONSE_TO_EXTRACELLULAR_STIMULUS	GO_NEGATIVE_REGULATION_OF_RESPONSE_TO_EXTRACELLULAR_STIMULUS		36	0.31200373	0.8994994	0.5805169	0.9654191	1.0	9988	tags=31%, list=18%, signal=37%
GO_OXIDOREDUCTASE_ACTIVITY_ACTING_ON_THE_CH_CH_GROUP_OF_DONORS	GO_OXIDOREDUCTASE_ACTIVITY_ACTING_ON_THE_CH_CH_GROUP_OF_DONORS		56	0.31881848	0.89921343	0.6074219	0.9654875	1.0	15340	tags=39%, list=28%, signal=55%
GO_POSITIVE_REGULATION_OF_ACTIN_NUCLEATION	GO_POSITIVE_REGULATION_OF_ACTIN_NUCLEATION		16	0.34353954	0.89880645	0.59325397	0.96592796	1.0	17272	tags=63%, list=32%, signal=92%
GO_NUCLEOTIDE_TRANSMEMBRANE_TRANSPORTER_ACTIVITY	GO_NUCLEOTIDE_TRANSMEMBRANE_TRANSPORTER_ACTIVITY		19	0.36009037	0.89880383	0.607438	0.96510595	1.0	14507	tags=47%, list=27%, signal=65%
GO_NUCLEOBASE_CONTAINING_COMPOUND_TRANSMEMBRANE_TRANSPORTER_ACTIVITY	GO_NUCLEOBASE_CONTAINING_COMPOUND_TRANSMEMBRANE_TRANSPORTER_ACTIVITY		31	0.33803526	0.89874303	0.5748988	0.96447045	1.0	10397	tags=32%, list=19%, signal=40%
GO_HOMOLOGOUS_CHROMOSOME_SEGREGATION	GO_HOMOLOGOUS_CHROMOSOME_SEGREGATION		45	0.31605312	0.89868104	0.62450594	0.96384126	1.0	8473	tags=27%, list=16%, signal=32%
GO_ODORANT_BINDING	GO_ODORANT_BINDING		90	0.26566282	0.8986126	0.58189654	0.9632211	1.0	13222	tags=18%, list=24%, signal=23%
GO_PEPTIDE_HORMONE_RECEPTOR_BINDING	GO_PEPTIDE_HORMONE_RECEPTOR_BINDING		17	0.38054404	0.8981704	0.59117085	0.96374226	1.0	6962	tags=35%, list=13%, signal=40%
GO_FATTY_ACYL_COA_METABOLIC_PROCESS	GO_FATTY_ACYL_COA_METABOLIC_PROCESS		50	0.31856292	0.8981611	0.57418114	0.96295387	1.0	17915	tags=54%, list=33%, signal=81%
GO_STRIATED_MUSCLE_ADAPTATION	GO_STRIATED_MUSCLE_ADAPTATION		23	0.32623133	0.8979787	0.6396917	0.96269244	1.0	5831	tags=26%, list=11%, signal=29%
GO_REGULATION_OF_CELL_DIVISION	GO_REGULATION_OF_CELL_DIVISION		267	0.2521605	0.8975405	0.6539197	0.9631712	1.0	10442	tags=28%, list=19%, signal=35%
GO_NECROTIC_CELL_DEATH	GO_NECROTIC_CELL_DEATH		28	0.33183727	0.8974856	0.5980198	0.9625295	1.0	14260	tags=43%, list=26%, signal=58%
GO_PALMITOYLTRANSFERASE_ACTIVITY	GO_PALMITOYLTRANSFERASE_ACTIVITY		36	0.30258748	0.8972197	0.6277666	0.9625035	1.0	11475	tags=28%, list=21%, signal=35%
GO_MODULATION_BY_SYMBIONT_OF_HOST_CELLULAR_PROCESS	GO_MODULATION_BY_SYMBIONT_OF_HOST_CELLULAR_PROCESS		28	0.30510467	0.89677715	0.6316872	0.9630087	1.0	6525	tags=25%, list=12%, signal=28%
GO_DETECTION_OF_LIGHT_STIMULUS_INVOLVED_IN_SENSORY_PERCEPTION	GO_DETECTION_OF_LIGHT_STIMULUS_INVOLVED_IN_SENSORY_PERCEPTION		18	0.35049522	0.8967101	0.63220674	0.9623675	1.0	11336	tags=44%, list=21%, signal=56%
GO_NAD_BINDING	GO_NAD_BINDING		53	0.30337107	0.8965115	0.58914727	0.96213734	1.0	11830	tags=36%, list=22%, signal=46%
GO_UNFOLDED_PROTEIN_BINDING	GO_UNFOLDED_PROTEIN_BINDING		98	0.27998495	0.8963513	0.6247544	0.9618388	1.0	11206	tags=35%, list=21%, signal=44%
GO_NEGATIVE_REGULATION_OF_INTRINSIC_APOPTOTIC_SIGNALING_PATHWAY	GO_NEGATIVE_REGULATION_OF_INTRINSIC_APOPTOTIC_SIGNALING_PATHWAY		84	0.2537087	0.89622223	0.72319686	0.96140206	1.0	14250	tags=37%, list=26%, signal=50%
GO_POSITIVE_REGULATION_OF_HEART_RATE	GO_POSITIVE_REGULATION_OF_HEART_RATE		22	0.3181382	0.8960009	0.6685824	0.9612397	1.0	7985	tags=32%, list=15%, signal=37%
GO_POSITIVE_REGULATION_OF_ERBB_SIGNALING_PATHWAY	GO_POSITIVE_REGULATION_OF_ERBB_SIGNALING_PATHWAY		35	0.29577067	0.8952455	0.66924566	0.9626343	1.0	14260	tags=40%, list=26%, signal=54%
GO_REGULATION_OF_HYDROGEN_PEROXIDE_INDUCED_CELL_DEATH	GO_REGULATION_OF_HYDROGEN_PEROXIDE_INDUCED_CELL_DEATH		19	0.34011608	0.89484787	0.5968689	0.9630327	1.0	14039	tags=47%, list=26%, signal=64%
GO_REGULATION_OF_CELL_CYCLE_G1_S_PHASE_TRANSITION	GO_REGULATION_OF_CELL_CYCLE_G1_S_PHASE_TRANSITION		144	0.27130407	0.89484334	0.6011673	0.9622341	1.0	14113	tags=40%, list=26%, signal=53%
GO_MEIOTIC_CELL_CYCLE	GO_MEIOTIC_CELL_CYCLE		179	0.27432692	0.89376915	0.6351351	0.9646335	1.0	12522	tags=34%, list=23%, signal=44%
GO_PHOTORECEPTOR_CONNECTING_CILIUM	GO_PHOTORECEPTOR_CONNECTING_CILIUM		30	0.31467962	0.8932887	0.6003937	0.96522063	1.0	1148	tags=13%, list=2%, signal=14%
GO_NEGATIVE_REGULATION_OF_CYTOKINE_PRODUCTION_INVOLVED_IN_IMMUNE_RESPONSE	GO_NEGATIVE_REGULATION_OF_CYTOKINE_PRODUCTION_INVOLVED_IN_IMMUNE_RESPONSE		22	0.3303501	0.8932218	0.65259117	0.96459913	1.0	11962	tags=36%, list=22%, signal=47%
GO_DEFENSE_RESPONSE_TO_OTHER_ORGANISM	GO_DEFENSE_RESPONSE_TO_OTHER_ORGANISM		495	0.26559228	0.89210474	0.7122153	0.9672024	1.0	11512	tags=27%, list=21%, signal=34%
GO_SUBSTANTIA_NIGRA_DEVELOPMENT	GO_SUBSTANTIA_NIGRA_DEVELOPMENT		45	0.2852413	0.8918032	0.6789168	0.9672635	1.0	14183	tags=42%, list=26%, signal=57%
GO_POSITIVE_REGULATION_OF_CELLULAR_PROTEIN_CATABOLIC_PROCESS	GO_POSITIVE_REGULATION_OF_CELLULAR_PROTEIN_CATABOLIC_PROCESS		189	0.25108755	0.89170164	0.65909094	0.9667527	1.0	13603	tags=37%, list=25%, signal=49%
GO_NEGATIVE_REGULATION_OF_SIGNAL_TRANSDUCTION_BY_P53_CLASS_MEDIATOR	GO_NEGATIVE_REGULATION_OF_SIGNAL_TRANSDUCTION_BY_P53_CLASS_MEDIATOR		27	0.30788633	0.89168155	0.6247505	0.9660006	1.0	9123	tags=33%, list=17%, signal=40%
GO_E_BOX_BINDING	GO_E_BOX_BINDING		34	0.31222224	0.8914013	0.68301886	0.9660224	1.0	16368	tags=56%, list=30%, signal=80%
GO_POSITIVE_REGULATION_OF_EPIDERMIS_DEVELOPMENT	GO_POSITIVE_REGULATION_OF_EPIDERMIS_DEVELOPMENT		31	0.32987016	0.89106625	0.6640316	0.9662303	1.0	14660	tags=48%, list=27%, signal=66%
GO_PHOSPHOPROTEIN_BINDING	GO_PHOSPHOPROTEIN_BINDING		59	0.26945832	0.8909838	0.6720322	0.96564674	1.0	5757	tags=19%, list=11%, signal=21%
GO_PROTEIN_KINASE_C_ACTIVITY	GO_PROTEIN_KINASE_C_ACTIVITY		16	0.36716142	0.89040846	0.5984556	0.9665101	1.0	10157	tags=44%, list=19%, signal=54%
GO_RESPONSE_TO_OXIDATIVE_STRESS	GO_RESPONSE_TO_OXIDATIVE_STRESS		348	0.22390938	0.8899556	0.8549618	0.9670362	1.0	11825	tags=29%, list=22%, signal=37%
GO_SPINDLE_POLE	GO_SPINDLE_POLE		116	0.29337344	0.889121	0.596	0.9687807	1.0	12748	tags=34%, list=23%, signal=45%
GO_PHOSPHOLIPID_BINDING	GO_PHOSPHOLIPID_BINDING		351	0.23283347	0.88821226	0.8027079	0.9706678	1.0	9976	tags=25%, list=18%, signal=31%
GO_EXOCYST	GO_EXOCYST		16	0.33408102	0.88813585	0.62677485	0.97008544	1.0	13208	tags=44%, list=24%, signal=58%
GO_GLUTATHIONE_TRANSFERASE_ACTIVITY	GO_GLUTATHIONE_TRANSFERASE_ACTIVITY		33	0.3165833	0.8871372	0.6432866	0.9723012	1.0	12171	tags=36%, list=22%, signal=47%
GO_POSITIVE_REGULATION_OF_CELL_CYCLE_PHASE_TRANSITION	GO_POSITIVE_REGULATION_OF_CELL_CYCLE_PHASE_TRANSITION		67	0.29122406	0.88711125	0.61013645	0.97157574	1.0	13476	tags=40%, list=25%, signal=54%
GO_T_CELL_RECEPTOR_SIGNALING_PATHWAY	GO_T_CELL_RECEPTOR_SIGNALING_PATHWAY		141	0.27384824	0.886842	0.6365462	0.9715714	1.0	14046	tags=40%, list=26%, signal=54%
GO_REGULATION_OF_DEPHOSPHORYLATION	GO_REGULATION_OF_DEPHOSPHORYLATION		153	0.25583765	0.88646495	0.6574803	0.97190547	1.0	13171	tags=35%, list=24%, signal=46%
GO_MODULATION_BY_VIRUS_OF_HOST_MORPHOLOGY_OR_PHYSIOLOGY	GO_MODULATION_BY_VIRUS_OF_HOST_MORPHOLOGY_OR_PHYSIOLOGY		37	0.27488196	0.8850039	0.7002096	0.97550136	1.0	8778	tags=27%, list=16%, signal=32%
GO_RESPONSE_TO_REACTIVE_OXYGEN_SPECIES	GO_RESPONSE_TO_REACTIVE_OXYGEN_SPECIES		189	0.22989789	0.8849174	0.82149714	0.9749506	1.0	12110	tags=30%, list=22%, signal=39%
GO_DNA_REPLICATION_DEPENDENT_NUCLEOSOME_ORGANIZATION	GO_DNA_REPLICATION_DEPENDENT_NUCLEOSOME_ORGANIZATION		32	0.38716462	0.88441133	0.60248446	0.9756414	1.0	16181	tags=47%, list=30%, signal=67%
GO_PROTEIN_HOMOTRIMERIZATION	GO_PROTEIN_HOMOTRIMERIZATION		19	0.31332207	0.884319	0.6818182	0.97509444	1.0	16442	tags=58%, list=30%, signal=83%
GO_CATION_CATION_ANTIPORTER_ACTIVITY	GO_CATION_CATION_ANTIPORTER_ACTIVITY		24	0.33362854	0.8843151	0.63833994	0.9742961	1.0	15852	tags=50%, list=29%, signal=71%
GO_POSITIVE_REGULATION_OF_FIBROBLAST_PROLIFERATION	GO_POSITIVE_REGULATION_OF_FIBROBLAST_PROLIFERATION		53	0.2744185	0.88402325	0.7212806	0.97435343	1.0	11989	tags=40%, list=22%, signal=51%
GO_MICROTUBULE_END	GO_MICROTUBULE_END		21	0.35499188	0.88384193	0.57545274	0.9740816	1.0	16960	tags=62%, list=31%, signal=90%
GO_CARBOHYDRATE_DERIVATIVE_TRANSPORT	GO_CARBOHYDRATE_DERIVATIVE_TRANSPORT		50	0.29466075	0.88375396	0.6467066	0.9735236	1.0	14507	tags=38%, list=27%, signal=52%
GO_NEGATIVE_REGULATION_OF_PROTEIN_SERINE_THREONINE_KINASE_ACTIVITY	GO_NEGATIVE_REGULATION_OF_PROTEIN_SERINE_THREONINE_KINASE_ACTIVITY		126	0.23707984	0.8837412	0.78373384	0.9727653	1.0	14002	tags=40%, list=26%, signal=54%
GO_CELLULAR_COMPONENT_MAINTENANCE	GO_CELLULAR_COMPONENT_MAINTENANCE		18	0.30474335	0.88300997	0.65882355	0.9740598	1.0	3004	tags=17%, list=6%, signal=18%
GO_RESPONSE_TO_OSMOTIC_STRESS	GO_RESPONSE_TO_OSMOTIC_STRESS		62	0.28259927	0.88288796	0.70726913	0.97362703	1.0	13286	tags=42%, list=24%, signal=55%
GO_T_CELL_PROLIFERATION	GO_T_CELL_PROLIFERATION		35	0.29286024	0.8823466	0.6587771	0.9744607	1.0	2686	tags=17%, list=5%, signal=18%
GO_REGULATION_OF_PHOSPHOPROTEIN_PHOSPHATASE_ACTIVITY	GO_REGULATION_OF_PHOSPHOPROTEIN_PHOSPHATASE_ACTIVITY		60	0.282532	0.8823087	0.6620553	0.97377205	1.0	12601	tags=37%, list=23%, signal=48%
GO_CORNIFIED_ENVELOPE	GO_CORNIFIED_ENVELOPE		45	0.32818988	0.88181347	0.63582677	0.97444016	1.0	12785	tags=36%, list=24%, signal=46%
GO_PROTEIN_HETEROOLIGOMERIZATION	GO_PROTEIN_HETEROOLIGOMERIZATION		110	0.2644438	0.88171726	0.6706587	0.9739497	1.0	12612	tags=36%, list=23%, signal=47%
GO_NEURAL_TUBE_FORMATION	GO_NEURAL_TUBE_FORMATION		94	0.27351782	0.8809948	0.62884617	0.975227	1.0	13227	tags=37%, list=24%, signal=49%
GO_PHOSPHOLIPID_BIOSYNTHETIC_PROCESS	GO_PHOSPHOLIPID_BIOSYNTHETIC_PROCESS		231	0.24697526	0.88096565	0.72837025	0.9745097	1.0	11269	tags=29%, list=21%, signal=36%
GO_TRABECULA_MORPHOGENESIS	GO_TRABECULA_MORPHOGENESIS		38	0.29267406	0.88090533	0.67992425	0.9739014	1.0	9517	tags=34%, list=18%, signal=41%
GO_CHROMOSOME_ORGANIZATION_INVOLVED_IN_MEIOTIC_CELL_CYCLE	GO_CHROMOSOME_ORGANIZATION_INVOLVED_IN_MEIOTIC_CELL_CYCLE		48	0.3042252	0.88072944	0.67572814	0.9736479	1.0	12148	tags=35%, list=22%, signal=46%
GO_RECYCLING_ENDOSOME	GO_RECYCLING_ENDOSOME		120	0.24380633	0.87979496	0.72709554	0.9756819	1.0	11109	tags=27%, list=20%, signal=33%
GO_PHOSPHORIC_ESTER_HYDROLASE_ACTIVITY	GO_PHOSPHORIC_ESTER_HYDROLASE_ACTIVITY		362	0.24062653	0.87899756	0.742126	0.9771948	1.0	14025	tags=35%, list=26%, signal=47%
GO_LYASE_ACTIVITY	GO_LYASE_ACTIVITY		173	0.25822946	0.87896395	0.6814672	0.9765005	1.0	10388	tags=30%, list=19%, signal=37%
GO_REGULATION_OF_LONG_TERM_NEURONAL_SYNAPTIC_PLASTICITY	GO_REGULATION_OF_LONG_TERM_NEURONAL_SYNAPTIC_PLASTICITY		24	0.31186795	0.878916	0.67330676	0.97584295	1.0	7963	tags=29%, list=15%, signal=34%
GO_RETINOID_X_RECEPTOR_BINDING	GO_RETINOID_X_RECEPTOR_BINDING		17	0.33858994	0.87887144	0.63394684	0.9751779	1.0	9725	tags=29%, list=18%, signal=36%
GO_ORGAN_INDUCTION	GO_ORGAN_INDUCTION		16	0.35037062	0.87804484	0.67115384	0.9768378	1.0	7732	tags=38%, list=14%, signal=44%
GO_GTPASE_BINDING	GO_GTPASE_BINDING		291	0.24252495	0.8779251	0.6912879	0.97638357	1.0	12653	tags=32%, list=23%, signal=41%
GO_HEME_METABOLIC_PROCESS	GO_HEME_METABOLIC_PROCESS		29	0.29034945	0.87734306	0.69803923	0.97731644	1.0	15737	tags=41%, list=29%, signal=58%
GO_INOSITOL_PHOSPHATE_PHOSPHATASE_ACTIVITY	GO_INOSITOL_PHOSPHATE_PHOSPHATASE_ACTIVITY		20	0.3213437	0.87697077	0.62601626	0.97762185	1.0	7345	tags=25%, list=14%, signal=29%
GO_NEGATIVE_REGULATION_OF_DNA_BINDING	GO_NEGATIVE_REGULATION_OF_DNA_BINDING		46	0.3060725	0.8767921	0.654224	0.9773558	1.0	9527	tags=33%, list=18%, signal=40%
GO_POLYOL_TRANSPORT	GO_POLYOL_TRANSPORT		17	0.38520992	0.8764797	0.62598425	0.97747856	1.0	13000	tags=59%, list=24%, signal=77%
GO_SIGNAL_TRANSDUCTION_IN_RESPONSE_TO_DNA_DAMAGE	GO_SIGNAL_TRANSDUCTION_IN_RESPONSE_TO_DNA_DAMAGE		94	0.28542602	0.87640685	0.61988306	0.97689885	1.0	11418	tags=31%, list=21%, signal=39%
GO_POSITIVE_REGULATION_OF_PROTEIN_COMPLEX_ASSEMBLY	GO_POSITIVE_REGULATION_OF_PROTEIN_COMPLEX_ASSEMBLY		190	0.24451701	0.87613595	0.6924565	0.9768679	1.0	12032	tags=30%, list=22%, signal=38%
GO_BLOC_COMPLEX	GO_BLOC_COMPLEX		16	0.3736817	0.8761136	0.6103093	0.9761436	1.0	18394	tags=63%, list=34%, signal=95%
GO_POSITIVE_REGULATION_OF_VIRAL_PROCESS	GO_POSITIVE_REGULATION_OF_VIRAL_PROCESS		86	0.2743604	0.87515414	0.6439394	0.97818494	1.0	10652	tags=29%, list=20%, signal=36%
GO_PHOSPHATIDYLINOSITOL_METABOLIC_PROCESS	GO_PHOSPHATIDYLINOSITOL_METABOLIC_PROCESS		192	0.24854128	0.87448424	0.75243664	0.97933924	1.0	10957	tags=31%, list=20%, signal=38%
GO_PHOSPHOTRANSFERASE_ACTIVITY_FOR_OTHER_SUBSTITUTED_PHOSPHATE_GROUPS	GO_PHOSPHOTRANSFERASE_ACTIVITY_FOR_OTHER_SUBSTITUTED_PHOSPHATE_GROUPS		19	0.31895384	0.8735495	0.66921604	0.98122525	1.0	16350	tags=47%, list=30%, signal=68%
GO_REGULATION_OF_DEFENSE_RESPONSE_TO_VIRUS_BY_VIRUS	GO_REGULATION_OF_DEFENSE_RESPONSE_TO_VIRUS_BY_VIRUS		29	0.3120597	0.8732333	0.66011786	0.98133177	1.0	6246	tags=24%, list=12%, signal=27%
GO_NEURON_MIGRATION	GO_NEURON_MIGRATION		108	0.26917338	0.87322634	0.7233645	0.9805601	1.0	10063	tags=28%, list=19%, signal=34%
GO_SOMITE_DEVELOPMENT	GO_SOMITE_DEVELOPMENT		78	0.2913328	0.8730914	0.6848249	0.98011893	1.0	7635	tags=28%, list=14%, signal=33%
GO_ENZYME_ACTIVATOR_ACTIVITY	GO_ENZYME_ACTIVATOR_ACTIVITY		462	0.22930296	0.872936	0.7731569	0.97979426	1.0	13471	tags=34%, list=25%, signal=45%
GO_DICARBOXYLIC_ACID_TRANSPORT	GO_DICARBOXYLIC_ACID_TRANSPORT		71	0.26763922	0.8725601	0.75096524	0.9800889	1.0	15627	tags=49%, list=29%, signal=69%
GO_NEGATIVE_REGULATION_OF_RESPONSE_TO_OXIDATIVE_STRESS	GO_NEGATIVE_REGULATION_OF_RESPONSE_TO_OXIDATIVE_STRESS		34	0.2899417	0.872544	0.71755725	0.97934794	1.0	14055	tags=53%, list=26%, signal=71%
GO_REGULATION_OF_INTERLEUKIN_17_PRODUCTION	GO_REGULATION_OF_INTERLEUKIN_17_PRODUCTION		22	0.33496845	0.87199533	0.7050505	0.98012817	1.0	10211	tags=32%, list=19%, signal=39%
GO_REGULATION_OF_NEUTROPHIL_CHEMOTAXIS	GO_REGULATION_OF_NEUTROPHIL_CHEMOTAXIS		26	0.32558966	0.87146544	0.6294896	0.98084366	1.0	14684	tags=42%, list=27%, signal=58%
GO_ENSHEATHMENT_OF_NEURONS	GO_ENSHEATHMENT_OF_NEURONS		88	0.26701576	0.8713255	0.7392157	0.98045254	1.0	14957	tags=45%, list=28%, signal=63%
GO_PROTEIN_SERINE_THREONINE_KINASE_ACTIVITY	GO_PROTEIN_SERINE_THREONINE_KINASE_ACTIVITY		437	0.23637031	0.8712884	0.7419962	0.9797659	1.0	12921	tags=31%, list=24%, signal=40%
GO_NEGATIVE_REGULATION_OF_GENE_EXPRESSION_EPIGENETIC	GO_NEGATIVE_REGULATION_OF_GENE_EXPRESSION_EPIGENETIC		110	0.290714	0.8710361	0.65384614	0.97968584	1.0	12612	tags=32%, list=23%, signal=41%
GO_REGULATION_OF_STRIATED_MUSCLE_CELL_APOPTOTIC_PROCESS	GO_REGULATION_OF_STRIATED_MUSCLE_CELL_APOPTOTIC_PROCESS		22	0.31631917	0.8697978	0.69649804	0.9824868	1.0	14002	tags=50%, list=26%, signal=67%
GO_CELLULAR_CARBOHYDRATE_METABOLIC_PROCESS	GO_CELLULAR_CARBOHYDRATE_METABOLIC_PROCESS		139	0.2525175	0.8697668	0.74693877	0.9817971	1.0	10754	tags=28%, list=20%, signal=35%
GO_DICARBOXYLIC_ACID_METABOLIC_PROCESS	GO_DICARBOXYLIC_ACID_METABOLIC_PROCESS		101	0.28326985	0.869701	0.66159695	0.9812071	1.0	14967	tags=43%, list=28%, signal=59%
GO_PROTEIN_STABILIZATION	GO_PROTEIN_STABILIZATION		129	0.24927457	0.8695885	0.7129456	0.98073494	1.0	11975	tags=31%, list=22%, signal=40%
GO_TUMOR_NECROSIS_FACTOR_MEDIATED_SIGNALING_PATHWAY	GO_TUMOR_NECROSIS_FACTOR_MEDIATED_SIGNALING_PATHWAY		117	0.27175686	0.8689918	0.6424242	0.9816782	1.0	13603	tags=35%, list=25%, signal=47%
GO_BITTER_TASTE_RECEPTOR_ACTIVITY	GO_BITTER_TASTE_RECEPTOR_ACTIVITY		24	0.3423564	0.8686982	0.6088632	0.98175114	1.0	10987	tags=29%, list=20%, signal=37%
GO_NEGATIVE_REGULATION_OF_ERBB_SIGNALING_PATHWAY	GO_NEGATIVE_REGULATION_OF_ERBB_SIGNALING_PATHWAY		44	0.2892213	0.8681839	0.6572008	0.9824556	1.0	13907	tags=43%, list=26%, signal=58%
GO_TRANSLATION_REGULATOR_ACTIVITY_NUCLEIC_ACID_BINDING	GO_TRANSLATION_REGULATOR_ACTIVITY_NUCLEIC_ACID_BINDING		18	0.3443275	0.86792696	0.6395112	0.98239636	1.0	10611	tags=28%, list=20%, signal=35%
GO_MITOTIC_CELL_CYCLE_CHECKPOINT	GO_MITOTIC_CELL_CYCLE_CHECKPOINT		134	0.27852216	0.8673271	0.6397638	0.9833442	1.0	12023	tags=34%, list=22%, signal=43%
GO_LYMPHOCYTE_ACTIVATION_INVOLVED_IN_IMMUNE_RESPONSE	GO_LYMPHOCYTE_ACTIVATION_INVOLVED_IN_IMMUNE_RESPONSE		98	0.24399903	0.8665364	0.8133595	0.98480844	1.0	12399	tags=27%, list=23%, signal=34%
GO_PALLIUM_DEVELOPMENT	GO_PALLIUM_DEVELOPMENT		152	0.25498047	0.8665207	0.74150944	0.9840717	1.0	9869	tags=29%, list=18%, signal=35%
GO_COPPER_ION_HOMEOSTASIS	GO_COPPER_ION_HOMEOSTASIS		16	0.34449324	0.86607003	0.6335283	0.9845989	1.0	7996	tags=19%, list=15%, signal=22%
GO_LAMELLIPODIUM_ASSEMBLY	GO_LAMELLIPODIUM_ASSEMBLY		29	0.30476972	0.8657948	0.6612245	0.984598	1.0	13047	tags=45%, list=24%, signal=59%
GO_UBIQUITIN_LIKE_PROTEIN_LIGASE_ACTIVITY	GO_UBIQUITIN_LIKE_PROTEIN_LIGASE_ACTIVITY		195	0.23231052	0.8656467	0.7967807	0.98422045	1.0	13481	tags=34%, list=25%, signal=45%
GO_CLATHRIN_ADAPTOR_COMPLEX	GO_CLATHRIN_ADAPTOR_COMPLEX		27	0.3236858	0.8652881	0.63	0.9845013	1.0	11558	tags=37%, list=21%, signal=47%
GO_MITOTIC_SPINDLE	GO_MITOTIC_SPINDLE		51	0.2881476	0.8649475	0.64271843	0.9846913	1.0	11742	tags=29%, list=22%, signal=37%
GO_HYDROGEN_ION_TRANSMEMBRANE_TRANSPORT	GO_HYDROGEN_ION_TRANSMEMBRANE_TRANSPORT		102	0.2835958	0.8646184	0.65680474	0.9848531	1.0	13448	tags=39%, list=25%, signal=52%
GO_REGULATION_OF_DIGESTIVE_SYSTEM_PROCESS	GO_REGULATION_OF_DIGESTIVE_SYSTEM_PROCESS		35	0.31221464	0.8642723	0.7026022	0.98501617	1.0	12715	tags=40%, list=23%, signal=52%
GO_DNA_CATABOLIC_PROCESS_ENDONUCLEOLYTIC	GO_DNA_CATABOLIC_PROCESS_ENDONUCLEOLYTIC		19	0.3277255	0.8642146	0.6469428	0.9844022	1.0	16133	tags=58%, list=30%, signal=82%
GO_VITAMIN_D_RECEPTOR_BINDING	GO_VITAMIN_D_RECEPTOR_BINDING		17	0.36371714	0.86418194	0.6394422	0.9837159	1.0	12461	tags=41%, list=23%, signal=53%
GO_GLYOXYLATE_METABOLIC_PROCESS	GO_GLYOXYLATE_METABOLIC_PROCESS		28	0.32679564	0.8640913	0.6330798	0.98320323	1.0	14495	tags=46%, list=27%, signal=63%
GO_LACTATION	GO_LACTATION		41	0.26836318	0.8630686	0.7639405	0.98537976	1.0	3770	tags=20%, list=7%, signal=21%
GO_POSITIVE_REGULATION_OF_VIRAL_TRANSCRIPTION	GO_POSITIVE_REGULATION_OF_VIRAL_TRANSCRIPTION		35	0.32629684	0.8629172	0.62332696	0.98501056	1.0	10401	tags=31%, list=19%, signal=39%
GO_ORGANELLE_DISASSEMBLY	GO_ORGANELLE_DISASSEMBLY		180	0.22896078	0.8624154	0.8374761	0.9856302	1.0	12709	tags=33%, list=23%, signal=43%
GO_REGULATION_OF_ARP2_3_COMPLEX_MEDIATED_ACTIN_NUCLEATION	GO_REGULATION_OF_ARP2_3_COMPLEX_MEDIATED_ACTIN_NUCLEATION		15	0.3415782	0.86231184	0.6939203	0.9851675	1.0	7070	tags=33%, list=13%, signal=38%
GO_PORPHYRIN_CONTAINING_COMPOUND_METABOLIC_PROCESS	GO_PORPHYRIN_CONTAINING_COMPOUND_METABOLIC_PROCESS		36	0.2763712	0.8614928	0.7315175	0.9866903	1.0	12221	tags=31%, list=23%, signal=39%
GO_RESPONSE_TO_CARBOHYDRATE	GO_RESPONSE_TO_CARBOHYDRATE		164	0.23817937	0.8613947	0.8235294	0.9861741	1.0	10321	tags=26%, list=19%, signal=32%
GO_MATERNAL_PLACENTA_DEVELOPMENT	GO_MATERNAL_PLACENTA_DEVELOPMENT		30	0.27597114	0.86131746	0.756917	0.9856204	1.0	9874	tags=33%, list=18%, signal=41%
GO_MYELOID_CELL_HOMEOSTASIS	GO_MYELOID_CELL_HOMEOSTASIS		85	0.23955925	0.8607203	0.80784315	0.98654383	1.0	6107	tags=19%, list=11%, signal=21%
GO_POSITIVE_REGULATION_OF_VIRAL_GENOME_REPLICATION	GO_POSITIVE_REGULATION_OF_VIRAL_GENOME_REPLICATION		30	0.30725548	0.8606061	0.67474747	0.98609	1.0	16284	tags=47%, list=30%, signal=67%
GO_ANDROGEN_RECEPTOR_SIGNALING_PATHWAY	GO_ANDROGEN_RECEPTOR_SIGNALING_PATHWAY		41	0.26443925	0.86049956	0.72167	0.9855983	1.0	10097	tags=24%, list=19%, signal=30%
GO_DENDRITIC_SHAFT	GO_DENDRITIC_SHAFT		36	0.30048075	0.8601856	0.68939394	0.9856789	1.0	15107	tags=42%, list=28%, signal=58%
GO_CELLULAR_RESPONSE_TO_IONIZING_RADIATION	GO_CELLULAR_RESPONSE_TO_IONIZING_RADIATION		50	0.27089012	0.8599942	0.70172083	0.98542047	1.0	14042	tags=32%, list=26%, signal=43%
GO_MACROAUTOPHAGY	GO_MACROAUTOPHAGY		268	0.22446866	0.85962445	0.8404669	0.9856606	1.0	15568	tags=40%, list=29%, signal=56%
GO_CELLULAR_COMPONENT_DISASSEMBLY_INVOLVED_IN_EXECUTION_PHASE_OF_APOPTOSIS	GO_CELLULAR_COMPONENT_DISASSEMBLY_INVOLVED_IN_EXECUTION_PHASE_OF_APOPTOSIS		42	0.2933467	0.8595997	0.678501	0.98496825	1.0	7651	tags=26%, list=14%, signal=30%
GO_CLATHRIN_COAT	GO_CLATHRIN_COAT		46	0.28846246	0.85957646	0.6699029	0.984276	1.0	11558	tags=35%, list=21%, signal=44%
GO_PEPTIDYL_CYSTEINE_MODIFICATION	GO_PEPTIDYL_CYSTEINE_MODIFICATION		20	0.31865653	0.8595182	0.71755725	0.9836869	1.0	11172	tags=35%, list=21%, signal=44%
GO_CD4_POSITIVE_ALPHA_BETA_T_CELL_ACTIVATION	GO_CD4_POSITIVE_ALPHA_BETA_T_CELL_ACTIVATION		34	0.29705724	0.8581315	0.72583824	0.9867033	1.0	10211	tags=32%, list=19%, signal=40%
GO_ACTIVATION_OF_CYSTEINE_TYPE_ENDOPEPTIDASE_ACTIVITY	GO_ACTIVATION_OF_CYSTEINE_TYPE_ENDOPEPTIDASE_ACTIVITY		95	0.25988322	0.8577459	0.7153846	0.9869974	1.0	14304	tags=38%, list=26%, signal=51%
GO_POSITIVE_REGULATION_OF_PROTEASOMAL_PROTEIN_CATABOLIC_PROCESS	GO_POSITIVE_REGULATION_OF_PROTEASOMAL_PROTEIN_CATABOLIC_PROCESS		98	0.24134134	0.8564504	0.7634195	0.98971367	1.0	14202	tags=41%, list=26%, signal=55%
GO_REGULATION_OF_NUCLEOTIDE_CATABOLIC_PROCESS	GO_REGULATION_OF_NUCLEOTIDE_CATABOLIC_PROCESS		36	0.27628037	0.85637146	0.7847358	0.9891592	1.0	12904	tags=36%, list=24%, signal=47%
GO_AMINOPEPTIDASE_ACTIVITY	GO_AMINOPEPTIDASE_ACTIVITY		41	0.26010248	0.8560132	0.8176353	0.98941386	1.0	14343	tags=41%, list=26%, signal=56%
GO_RHYTHMIC_PROCESS	GO_RHYTHMIC_PROCESS		295	0.22404642	0.8555681	0.9118199	0.9899105	1.0	12055	tags=30%, list=22%, signal=38%
GO_RESPONSE_TO_TOXIC_SUBSTANCE	GO_RESPONSE_TO_TOXIC_SUBSTANCE		234	0.23764376	0.85549235	0.84485984	0.98936707	1.0	12263	tags=34%, list=23%, signal=43%
GO_WIDE_PORE_CHANNEL_ACTIVITY	GO_WIDE_PORE_CHANNEL_ACTIVITY		23	0.32602888	0.8549009	0.69153225	0.99026537	1.0	12157	tags=48%, list=22%, signal=62%
GO_REGULATION_OF_TOLL_LIKE_RECEPTOR_4_SIGNALING_PATHWAY	GO_REGULATION_OF_TOLL_LIKE_RECEPTOR_4_SIGNALING_PATHWAY		17	0.32905546	0.8537952	0.68473893	0.9925195	1.0	1440	tags=12%, list=3%, signal=12%
GO_NEGATIVE_REGULATION_OF_HISTONE_MODIFICATION	GO_NEGATIVE_REGULATION_OF_HISTONE_MODIFICATION		36	0.32219386	0.8536908	0.6404715	0.9920324	1.0	12616	tags=42%, list=23%, signal=54%
GO_EXOCYTIC_VESICLE	GO_EXOCYTIC_VESICLE		140	0.24523868	0.8535248	0.8404453	0.99174315	1.0	10120	tags=26%, list=19%, signal=32%
GO_TRANSCRIPTION_COFACTOR_BINDING	GO_TRANSCRIPTION_COFACTOR_BINDING		24	0.31179264	0.8535021	0.7237354	0.9910661	1.0	6638	tags=25%, list=12%, signal=28%
GO_REGULATION_OF_NUCLEASE_ACTIVITY	GO_REGULATION_OF_NUCLEASE_ACTIVITY		23	0.3238845	0.85348594	0.686722	0.9903491	1.0	13431	tags=43%, list=25%, signal=58%
GO_MITOCHONDRION_MORPHOGENESIS	GO_MITOCHONDRION_MORPHOGENESIS		19	0.32210156	0.8529123	0.6613546	0.99117255	1.0	3927	tags=16%, list=7%, signal=17%
GO_NEGATIVE_REGULATION_OF_KINASE_ACTIVITY	GO_NEGATIVE_REGULATION_OF_KINASE_ACTIVITY		247	0.22412339	0.8527407	0.9012797	0.9908657	1.0	14002	tags=38%, list=26%, signal=52%
GO_POLYSACCHARIDE_BIOSYNTHETIC_PROCESS	GO_POLYSACCHARIDE_BIOSYNTHETIC_PROCESS		42	0.27513948	0.85256743	0.7758621	0.99057454	1.0	11576	tags=33%, list=21%, signal=42%
GO_COFACTOR_CATABOLIC_PROCESS	GO_COFACTOR_CATABOLIC_PROCESS		20	0.34542543	0.85197645	0.66930693	0.99146265	1.0	11999	tags=30%, list=22%, signal=39%
GO_CAMP_METABOLIC_PROCESS	GO_CAMP_METABOLIC_PROCESS		34	0.2980404	0.8518113	0.74910396	0.9911499	1.0	6941	tags=24%, list=13%, signal=27%
GO_POSITIVE_REGULATION_OF_I_KAPPAB_KINASE_NF_KAPPAB_SIGNALING	GO_POSITIVE_REGULATION_OF_I_KAPPAB_KINASE_NF_KAPPAB_SIGNALING		177	0.25235	0.851451	0.7104762	0.99142176	1.0	11974	tags=30%, list=22%, signal=38%
GO_NEGATIVE_REGULATION_OF_CIRCADIAN_RHYTHM	GO_NEGATIVE_REGULATION_OF_CIRCADIAN_RHYTHM		17	0.3403582	0.8510561	0.68615985	0.9917717	1.0	6101	tags=29%, list=11%, signal=33%
GO_SYNTAXIN_1_BINDING	GO_SYNTAXIN_1_BINDING		18	0.33046305	0.8500964	0.7017544	0.99367595	1.0	6840	tags=28%, list=13%, signal=32%
GO_REGULATION_OF_PROTEIN_STABILITY	GO_REGULATION_OF_PROTEIN_STABILITY		216	0.23266703	0.84986943	0.81273407	0.9935349	1.0	12192	tags=31%, list=22%, signal=39%
GO_POSITIVE_REGULATION_OF_BINDING	GO_POSITIVE_REGULATION_OF_BINDING		127	0.24346113	0.84943026	0.80353636	0.9939645	1.0	8587	tags=23%, list=16%, signal=27%
GO_MYELOID_LEUKOCYTE_DIFFERENTIATION	GO_MYELOID_LEUKOCYTE_DIFFERENTIATION		94	0.25320974	0.84933573	0.79096043	0.99345255	1.0	8628	tags=22%, list=16%, signal=27%
GO_SOLUTE_SODIUM_SYMPORTER_ACTIVITY	GO_SOLUTE_SODIUM_SYMPORTER_ACTIVITY		50	0.32140106	0.8492894	0.6879699	0.9928145	1.0	13388	tags=46%, list=25%, signal=61%
GO_MYELOID_CELL_ACTIVATION_INVOLVED_IN_IMMUNE_RESPONSE	GO_MYELOID_CELL_ACTIVATION_INVOLVED_IN_IMMUNE_RESPONSE		41	0.28717035	0.84858525	0.78336555	0.9939168	1.0	10900	tags=37%, list=20%, signal=46%
GO_PEROXISOMAL_TRANSPORT	GO_PEROXISOMAL_TRANSPORT		18	0.3236599	0.84834564	0.67315173	0.99382263	1.0	5009	tags=22%, list=9%, signal=24%
GO_ERYTHROCYTE_HOMEOSTASIS	GO_ERYTHROCYTE_HOMEOSTASIS		70	0.23959698	0.8483448	0.82912624	0.9930696	1.0	6057	tags=19%, list=11%, signal=21%
GO_COENZYME_BINDING	GO_COENZYME_BINDING		176	0.2691145	0.8482382	0.6903846	0.99261045	1.0	14227	tags=36%, list=26%, signal=49%
GO_RESPONSE_TO_HEAT	GO_RESPONSE_TO_HEAT		87	0.24508597	0.84787583	0.82217973	0.9928199	1.0	14245	tags=38%, list=26%, signal=51%
GO_RECYCLING_ENDOSOME_MEMBRANE	GO_RECYCLING_ENDOSOME_MEMBRANE		40	0.27822807	0.8478071	0.73427993	0.9922455	1.0	9802	tags=25%, list=18%, signal=30%
GO_INTRINSIC_APOPTOTIC_SIGNALING_PATHWAY_IN_RESPONSE_TO_DNA_DAMAGE_BY_P53_CLASS_MEDIATOR	GO_INTRINSIC_APOPTOTIC_SIGNALING_PATHWAY_IN_RESPONSE_TO_DNA_DAMAGE_BY_P53_CLASS_MEDIATOR		29	0.29878372	0.8477766	0.69959676	0.9915712	1.0	11418	tags=31%, list=21%, signal=39%
GO_MICROTUBULE_MOTOR_ACTIVITY	GO_MICROTUBULE_MOTOR_ACTIVITY		76	0.27242646	0.8471854	0.7049505	0.9924201	1.0	17726	tags=55%, list=33%, signal=82%
GO_POSITIVE_REGULATION_OF_INTRACELLULAR_PROTEIN_TRANSPORT	GO_POSITIVE_REGULATION_OF_INTRACELLULAR_PROTEIN_TRANSPORT		249	0.22453158	0.84669614	0.88314176	0.99297273	1.0	10059	tags=24%, list=19%, signal=30%
GO_NUCLEAR_HETEROCHROMATIN	GO_NUCLEAR_HETEROCHROMATIN		32	0.31484452	0.8461882	0.6542969	0.9935643	1.0	14245	tags=50%, list=26%, signal=68%
GO_NEGATIVE_REGULATION_OF_STRESS_ACTIVATED_PROTEIN_KINASE_SIGNALING_CASCADE	GO_NEGATIVE_REGULATION_OF_STRESS_ACTIVATED_PROTEIN_KINASE_SIGNALING_CASCADE		41	0.27475393	0.84601885	0.7476099	0.99325395	1.0	14002	tags=32%, list=26%, signal=43%
GO_B_CELL_HOMEOSTASIS	GO_B_CELL_HOMEOSTASIS		21	0.31046522	0.8457761	0.69	0.9931607	1.0	16106	tags=52%, list=30%, signal=74%
GO_REGULATION_OF_VASCULAR_ENDOTHELIAL_GROWTH_FACTOR_RECEPTOR_SIGNALING_PATHWAY	GO_REGULATION_OF_VASCULAR_ENDOTHELIAL_GROWTH_FACTOR_RECEPTOR_SIGNALING_PATHWAY		27	0.29508144	0.84549224	0.7850288	0.99313873	1.0	9610	tags=33%, list=18%, signal=40%
GO_PHOSPHATIDYLINOSITOL_3_PHOSPHATE_BINDING	GO_PHOSPHATIDYLINOSITOL_3_PHOSPHATE_BINDING		30	0.2907578	0.84510446	0.7403101	0.99344033	1.0	14988	tags=37%, list=28%, signal=51%
GO_ZYMOGEN_ACTIVATION	GO_ZYMOGEN_ACTIVATION		112	0.2531239	0.845064	0.7825243	0.99280524	1.0	14304	tags=37%, list=26%, signal=50%
GO_CELLULAR_RESPONSE_TO_ANTIBIOTIC	GO_CELLULAR_RESPONSE_TO_ANTIBIOTIC		16	0.34665114	0.8438378	0.6862004	0.9953276	1.0	9802	tags=31%, list=18%, signal=38%
GO_OXIDOREDUCTASE_ACTIVITY_ACTING_ON_A_SULFUR_GROUP_OF_DONORS	GO_OXIDOREDUCTASE_ACTIVITY_ACTING_ON_A_SULFUR_GROUP_OF_DONORS		48	0.26067877	0.84344536	0.79793817	0.99561924	1.0	13248	tags=35%, list=24%, signal=47%
GO_AGING	GO_AGING		263	0.21771234	0.84316576	0.9444444	0.9956061	1.0	12440	tags=30%, list=23%, signal=39%
GO_MUSCLE_ADAPTATION	GO_MUSCLE_ADAPTATION		29	0.2873442	0.8431301	0.80851066	0.99494773	1.0	5831	tags=21%, list=11%, signal=23%
GO_CORE_PROMOTER_PROXIMAL_REGION_DNA_BINDING	GO_CORE_PROMOTER_PROXIMAL_REGION_DNA_BINDING		363	0.24452038	0.8427527	0.78154427	0.995233	1.0	15821	tags=41%, list=29%, signal=58%
GO_SYNAPSIS	GO_SYNAPSIS		35	0.30482054	0.84240764	0.71976966	0.9953814	1.0	8473	tags=29%, list=16%, signal=34%
GO_POSITIVE_REGULATION_OF_PROTEIN_CATABOLIC_PROCESS	GO_POSITIVE_REGULATION_OF_PROTEIN_CATABOLIC_PROCESS		258	0.22627181	0.8408833	0.82459676	0.998642	1.0	13603	tags=34%, list=25%, signal=45%
GO_LYMPHOCYTE_CHEMOTAXIS	GO_LYMPHOCYTE_CHEMOTAXIS		38	0.29351678	0.8408691	0.7631068	0.9979355	1.0	7855	tags=24%, list=14%, signal=28%
GO_REGULATION_OF_PHOSPHATASE_ACTIVITY	GO_REGULATION_OF_PHOSPHATASE_ACTIVITY		125	0.24458034	0.84077185	0.8211538	0.9974261	1.0	12601	tags=32%, list=23%, signal=42%
GO_CELLULAR_RESPONSE_TO_DEXAMETHASONE_STIMULUS	GO_CELLULAR_RESPONSE_TO_DEXAMETHASONE_STIMULUS		27	0.31060877	0.8406565	0.75	0.9969815	1.0	7451	tags=22%, list=14%, signal=26%
GO_CHROMATIN_SILENCING_AT_RDNA	GO_CHROMATIN_SILENCING_AT_RDNA		37	0.34893602	0.8406094	0.6556701	0.9963555	1.0	14673	tags=41%, list=27%, signal=56%
GO_POSITIVE_REGULATION_OF_RESPONSE_TO_EXTRACELLULAR_STIMULUS	GO_POSITIVE_REGULATION_OF_RESPONSE_TO_EXTRACELLULAR_STIMULUS		48	0.2795119	0.840518	0.6803279	0.99584466	1.0	15048	tags=42%, list=28%, signal=58%
GO_HORMONE_TRANSPORT	GO_HORMONE_TRANSPORT		77	0.24903762	0.8403182	0.8439202	0.99562025	1.0	8333	tags=26%, list=15%, signal=31%
GO_LRR_DOMAIN_BINDING	GO_LRR_DOMAIN_BINDING		17	0.31555167	0.84027225	0.70428014	0.9949951	1.0	14055	tags=41%, list=26%, signal=56%
GO_VASOCONSTRICTION	GO_VASOCONSTRICTION		28	0.29965916	0.8399042	0.7624751	0.99520063	1.0	11262	tags=39%, list=21%, signal=50%
GO_PRESYNAPTIC_ACTIVE_ZONE	GO_PRESYNAPTIC_ACTIVE_ZONE		28	0.34652713	0.8392735	0.70384616	0.9961303	1.0	10186	tags=43%, list=19%, signal=53%
GO_NEGATIVE_REGULATION_OF_INTRACELLULAR_SIGNAL_TRANSDUCTION	GO_NEGATIVE_REGULATION_OF_INTRACELLULAR_SIGNAL_TRANSDUCTION		428	0.21294387	0.8391337	0.94990724	0.9957523	1.0	13651	tags=32%, list=25%, signal=42%
GO_REGULATION_OF_RUFFLE_ASSEMBLY	GO_REGULATION_OF_RUFFLE_ASSEMBLY		21	0.30997837	0.83894366	0.72156864	0.99551284	1.0	9613	tags=33%, list=18%, signal=40%
GO_POSITIVE_REGULATION_OF_DNA_BINDING	GO_POSITIVE_REGULATION_OF_DNA_BINDING		42	0.2703603	0.83865625	0.75722545	0.9955012	1.0	5464	tags=21%, list=10%, signal=24%
GO_REGULATION_OF_RESPIRATORY_SYSTEM_PROCESS	GO_REGULATION_OF_RESPIRATORY_SYSTEM_PROCESS		15	0.37729782	0.83848923	0.66799206	0.99518174	1.0	9068	tags=33%, list=17%, signal=40%
GO_POLYOL_BIOSYNTHETIC_PROCESS	GO_POLYOL_BIOSYNTHETIC_PROCESS		26	0.30124152	0.8384566	0.6936759	0.9945333	1.0	6692	tags=19%, list=12%, signal=22%
GO_PRESYNAPTIC_PROCESS_INVOLVED_IN_SYNAPTIC_TRANSMISSION	GO_PRESYNAPTIC_PROCESS_INVOLVED_IN_SYNAPTIC_TRANSMISSION		113	0.25671735	0.83735096	0.8253359	0.9966673	1.0	10394	tags=30%, list=19%, signal=37%
GO_CELL_DIFFERENTIATION_INVOLVED_IN_EMBRYONIC_PLACENTA_DEVELOPMENT	GO_CELL_DIFFERENTIATION_INVOLVED_IN_EMBRYONIC_PLACENTA_DEVELOPMENT		25	0.32110217	0.83733606	0.71203154	0.9959783	1.0	6992	tags=28%, list=13%, signal=32%
GO_CELLULAR_RESPONSE_TO_OXIDATIVE_STRESS	GO_CELLULAR_RESPONSE_TO_OXIDATIVE_STRESS		181	0.22482394	0.8373124	0.91067964	0.99529886	1.0	11627	tags=29%, list=21%, signal=37%
GO_PML_BODY	GO_PML_BODY		96	0.2527331	0.8371981	0.7337165	0.9948636	1.0	13643	tags=39%, list=25%, signal=51%
GO_CARBOHYDRATE_BIOSYNTHETIC_PROCESS	GO_CARBOHYDRATE_BIOSYNTHETIC_PROCESS		120	0.2347158	0.83679533	0.84220535	0.9951741	1.0	11952	tags=31%, list=22%, signal=39%
GO_SCF_UBIQUITIN_LIGASE_COMPLEX	GO_SCF_UBIQUITIN_LIGASE_COMPLEX		34	0.28212833	0.83633703	0.7504762	0.99559903	1.0	17086	tags=50%, list=31%, signal=73%
GO_OSTEOBLAST_DIFFERENTIATION	GO_OSTEOBLAST_DIFFERENTIATION		125	0.23909685	0.83594215	0.87732345	0.9958914	1.0	12330	tags=33%, list=23%, signal=42%
GO_REGULATION_OF_INTRINSIC_APOPTOTIC_SIGNALING_PATHWAY_IN_RESPONSE_TO_DNA_DAMAGE	GO_REGULATION_OF_INTRINSIC_APOPTOTIC_SIGNALING_PATHWAY_IN_RESPONSE_TO_DNA_DAMAGE		32	0.26330608	0.83456826	0.7822736	0.9986733	1.0	8681	tags=31%, list=16%, signal=37%
GO_OVARIAN_FOLLICLE_DEVELOPMENT	GO_OVARIAN_FOLLICLE_DEVELOPMENT		60	0.25137553	0.83448136	0.8142077	0.99815863	1.0	12055	tags=35%, list=22%, signal=45%
GO_REGULATION_OF_AUTOPHAGOSOME_ASSEMBLY	GO_REGULATION_OF_AUTOPHAGOSOME_ASSEMBLY		34	0.27564046	0.83429	0.73493975	0.9978931	1.0	13474	tags=38%, list=25%, signal=51%
GO_APOPTOTIC_NUCLEAR_CHANGES	GO_APOPTOTIC_NUCLEAR_CHANGES		24	0.31427297	0.8334399	0.702	0.999319	1.0	16133	tags=58%, list=30%, signal=83%
GO_RESPONSE_TO_EXOGENOUS_DSRNA	GO_RESPONSE_TO_EXOGENOUS_DSRNA		45	0.28801608	0.833403	0.7309237	0.9986817	1.0	5559	tags=16%, list=10%, signal=17%
GO_AMINO_ACID_TRANSPORT	GO_AMINO_ACID_TRANSPORT		122	0.25268814	0.8333076	0.83858997	0.9982016	1.0	10186	tags=31%, list=19%, signal=38%
GO_MODULATION_OF_TRANSCRIPTION_IN_OTHER_ORGANISM_INVOLVED_IN_SYMBIOTIC_INTERACTION	GO_MODULATION_OF_TRANSCRIPTION_IN_OTHER_ORGANISM_INVOLVED_IN_SYMBIOTIC_INTERACTION		22	0.3333969	0.83326083	0.6803119	0.9975762	1.0	10157	tags=36%, list=19%, signal=45%
GO_POSITIVE_REGULATION_OF_MITOTIC_NUCLEAR_DIVISION	GO_POSITIVE_REGULATION_OF_MITOTIC_NUCLEAR_DIVISION		50	0.24849431	0.83311963	0.8549618	0.99720657	1.0	10687	tags=32%, list=20%, signal=40%
GO_RUFFLE_ORGANIZATION	GO_RUFFLE_ORGANIZATION		21	0.3131497	0.83287275	0.7026477	0.9970947	1.0	13289	tags=38%, list=24%, signal=50%
GO_NEUROMUSCULAR_JUNCTION_DEVELOPMENT	GO_NEUROMUSCULAR_JUNCTION_DEVELOPMENT		36	0.28426227	0.83279645	0.7582846	0.9965592	1.0	12757	tags=44%, list=24%, signal=58%
GO_REGULATION_OF_EPIDERMIS_DEVELOPMENT	GO_REGULATION_OF_EPIDERMIS_DEVELOPMENT		61	0.27589607	0.8324586	0.76218325	0.9966694	1.0	13286	tags=41%, list=24%, signal=54%
GO_NECROPTOTIC_PROCESS	GO_NECROPTOTIC_PROCESS		21	0.31921226	0.83244133	0.70974153	0.99598265	1.0	11962	tags=38%, list=22%, signal=49%
GO_NEGATIVE_REGULATION_OF_CYTOSKELETON_ORGANIZATION	GO_NEGATIVE_REGULATION_OF_CYTOSKELETON_ORGANIZATION		215	0.25349316	0.8324187	0.7157258	0.9953274	1.0	11428	tags=31%, list=21%, signal=39%
GO_POSITIVE_REGULATION_OF_INTRACELLULAR_TRANSPORT	GO_POSITIVE_REGULATION_OF_INTRACELLULAR_TRANSPORT		359	0.22037928	0.83168036	0.921875	0.99644643	1.0	10059	tags=24%, list=19%, signal=29%
GO_POSITIVE_REGULATION_OF_APOPTOTIC_SIGNALING_PATHWAY	GO_POSITIVE_REGULATION_OF_APOPTOTIC_SIGNALING_PATHWAY		169	0.23714077	0.8312327	0.7949219	0.9968436	1.0	7555	tags=21%, list=14%, signal=25%
GO_STARTLE_RESPONSE	GO_STARTLE_RESPONSE		25	0.32371706	0.83116764	0.7186312	0.9962766	1.0	10050	tags=40%, list=19%, signal=49%
GO_GLIAL_CELL_DEVELOPMENT	GO_GLIAL_CELL_DEVELOPMENT		73	0.25315174	0.83014774	0.8333333	0.9981313	1.0	11710	tags=33%, list=22%, signal=42%
GO_ORGANOPHOSPHATE_ESTER_TRANSMEMBRANE_TRANSPORTER_ACTIVITY	GO_ORGANOPHOSPHATE_ESTER_TRANSMEMBRANE_TRANSPORTER_ACTIVITY		23	0.31994823	0.8298502	0.6923077	0.9981821	1.0	14507	tags=39%, list=27%, signal=53%
GO_RHO_GTPASE_BINDING	GO_RHO_GTPASE_BINDING		76	0.26442704	0.8297615	0.72568095	0.99767864	1.0	16269	tags=47%, list=30%, signal=68%
GO_DNA_DIRECTED_RNA_POLYMERASE_II_CORE_COMPLEX	GO_DNA_DIRECTED_RNA_POLYMERASE_II_CORE_COMPLEX		16	0.31967145	0.829678	0.6970803	0.9971464	1.0	10401	tags=38%, list=19%, signal=46%
GO_LIPID_PARTICLE	GO_LIPID_PARTICLE		61	0.26102194	0.8291303	0.8062016	0.99781585	1.0	8833	tags=26%, list=16%, signal=31%
GO_ANTIGEN_RECEPTOR_MEDIATED_SIGNALING_PATHWAY	GO_ANTIGEN_RECEPTOR_MEDIATED_SIGNALING_PATHWAY		190	0.25109223	0.8291251	0.77327937	0.99710137	1.0	12013	tags=32%, list=22%, signal=40%
GO_ATPASE_REGULATOR_ACTIVITY	GO_ATPASE_REGULATOR_ACTIVITY		30	0.29173285	0.82902867	0.7519531	0.99662536	1.0	14840	tags=53%, list=27%, signal=73%
GO_CEREBRAL_CORTEX_NEURON_DIFFERENTIATION	GO_CEREBRAL_CORTEX_NEURON_DIFFERENTIATION		22	0.31630605	0.8288867	0.7348485	0.996255	1.0	7264	tags=27%, list=13%, signal=31%
GO_PIGMENT_BIOSYNTHETIC_PROCESS	GO_PIGMENT_BIOSYNTHETIC_PROCESS		47	0.2612584	0.8286368	0.79435486	0.9961507	1.0	6752	tags=23%, list=12%, signal=27%
GO_MIDDLE_EAR_MORPHOGENESIS	GO_MIDDLE_EAR_MORPHOGENESIS		20	0.3237818	0.8281726	0.71057886	0.9965428	1.0	8585	tags=35%, list=16%, signal=42%
GO_CAMP_BINDING	GO_CAMP_BINDING		22	0.306537	0.82815677	0.7830882	0.9958487	1.0	8966	tags=32%, list=17%, signal=38%
GO_TRANSCRIPTION_FACTOR_COMPLEX	GO_TRANSCRIPTION_FACTOR_COMPLEX		295	0.24623506	0.8279484	0.8042636	0.9956467	1.0	11975	tags=32%, list=22%, signal=41%
GO_NEGATIVE_REGULATION_OF_STRIATED_MUSCLE_CELL_APOPTOTIC_PROCESS	GO_NEGATIVE_REGULATION_OF_STRIATED_MUSCLE_CELL_APOPTOTIC_PROCESS		17	0.32185587	0.8277541	0.76045626	0.99541074	1.0	14002	tags=53%, list=26%, signal=71%
GO_REPRESSING_TRANSCRIPTION_FACTOR_BINDING	GO_REPRESSING_TRANSCRIPTION_FACTOR_BINDING		57	0.26040184	0.82754576	0.76893204	0.9951743	1.0	16966	tags=51%, list=31%, signal=74%
GO_PROTEIN_FOLDING	GO_PROTEIN_FOLDING		218	0.23635608	0.82742083	0.8070866	0.99475265	1.0	14167	tags=38%, list=26%, signal=51%
GO_REGULATION_OF_TRANSCRIPTION_REGULATORY_REGION_DNA_BINDING	GO_REGULATION_OF_TRANSCRIPTION_REGULATORY_REGION_DNA_BINDING		36	0.29162642	0.82740414	0.73134327	0.99408126	1.0	9527	tags=28%, list=18%, signal=34%
GO_CONDENSED_NUCLEAR_CHROMOSOME_CENTROMERIC_REGION	GO_CONDENSED_NUCLEAR_CHROMOSOME_CENTROMERIC_REGION		16	0.33145714	0.82729685	0.7151515	0.9936264	1.0	15304	tags=63%, list=28%, signal=87%
GO_SIGNAL_RELEASE	GO_SIGNAL_RELEASE		169	0.24082908	0.8272354	0.8890943	0.993053	1.0	10394	tags=29%, list=19%, signal=36%
GO_FOREBRAIN_REGIONALIZATION	GO_FOREBRAIN_REGIONALIZATION		25	0.3373851	0.82708263	0.7480315	0.99267715	1.0	9607	tags=40%, list=18%, signal=49%
GO_PEPTIDYL_SERINE_MODIFICATION	GO_PEPTIDYL_SERINE_MODIFICATION		146	0.24376719	0.8267068	0.7976424	0.9928748	1.0	12904	tags=31%, list=24%, signal=40%
GO_POSITIVE_REGULATION_OF_CANONICAL_WNT_SIGNALING_PATHWAY	GO_POSITIVE_REGULATION_OF_CANONICAL_WNT_SIGNALING_PATHWAY		117	0.2478714	0.826477	0.8057692	0.9927021	1.0	15294	tags=43%, list=28%, signal=59%
GO_POSITIVE_REGULATION_OF_EPITHELIAL_CELL_DIFFERENTIATION	GO_POSITIVE_REGULATION_OF_EPITHELIAL_CELL_DIFFERENTIATION		55	0.26307485	0.8262352	0.8073218	0.9926038	1.0	14151	tags=44%, list=26%, signal=59%
GO_NEGATIVE_REGULATION_OF_ADHERENS_JUNCTION_ORGANIZATION	GO_NEGATIVE_REGULATION_OF_ADHERENS_JUNCTION_ORGANIZATION		15	0.311701	0.8259074	0.7523992	0.9926818	1.0	7684	tags=33%, list=14%, signal=39%
GO_REGULATION_OF_INTRACELLULAR_ESTROGEN_RECEPTOR_SIGNALING_PATHWAY	GO_REGULATION_OF_INTRACELLULAR_ESTROGEN_RECEPTOR_SIGNALING_PATHWAY		26	0.31299308	0.8257795	0.71984434	0.99228334	1.0	10671	tags=38%, list=20%, signal=48%
GO_APOPTOTIC_SIGNALING_PATHWAY	GO_APOPTOTIC_SIGNALING_PATHWAY		287	0.22751175	0.8254892	0.87356323	0.99231344	1.0	13227	tags=32%, list=24%, signal=42%
GO_BILE_ACID_BIOSYNTHETIC_PROCESS	GO_BILE_ACID_BIOSYNTHETIC_PROCESS		20	0.37219766	0.82450503	0.6996124	0.9939366	1.0	8542	tags=30%, list=16%, signal=36%
GO_LYMPH_VESSEL_DEVELOPMENT	GO_LYMPH_VESSEL_DEVELOPMENT		20	0.3223373	0.82447684	0.7369403	0.9932882	1.0	8047	tags=35%, list=15%, signal=41%
GO_GLYCOLIPID_BIOSYNTHETIC_PROCESS	GO_GLYCOLIPID_BIOSYNTHETIC_PROCESS		61	0.2687156	0.82444876	0.7534791	0.9926377	1.0	10517	tags=33%, list=19%, signal=41%
GO_NEGATIVE_REGULATION_OF_MAP_KINASE_ACTIVITY	GO_NEGATIVE_REGULATION_OF_MAP_KINASE_ACTIVITY		73	0.23628725	0.8239682	0.87265915	0.9930966	1.0	14002	tags=38%, list=26%, signal=52%
GO_RECEPTOR_CLUSTERING	GO_RECEPTOR_CLUSTERING		41	0.26875514	0.8237493	0.77348065	0.9929175	1.0	10741	tags=34%, list=20%, signal=43%
GO_RESPONSE_TO_ORGANOPHOSPHORUS	GO_RESPONSE_TO_ORGANOPHOSPHORUS		138	0.24325554	0.8230737	0.89239335	0.9938189	1.0	14742	tags=38%, list=27%, signal=53%
GO_GLUTATHIONE_DERIVATIVE_METABOLIC_PROCESS	GO_GLUTATHIONE_DERIVATIVE_METABOLIC_PROCESS		22	0.32559803	0.82282025	0.7062257	0.99369955	1.0	9604	tags=27%, list=18%, signal=33%
GO_NEGATIVE_REGULATION_OF_ENDOCYTOSIS	GO_NEGATIVE_REGULATION_OF_ENDOCYTOSIS		39	0.25156456	0.8227394	0.8612167	0.9931794	1.0	12399	tags=36%, list=23%, signal=46%
GO_MICROTUBULE_ASSOCIATED_COMPLEX	GO_MICROTUBULE_ASSOCIATED_COMPLEX		143	0.24372597	0.8215322	0.777551	0.9954314	1.0	15418	tags=41%, list=28%, signal=57%
GO_REGULATION_OF_GENE_SILENCING	GO_REGULATION_OF_GENE_SILENCING		50	0.27837503	0.82147026	0.734252	0.9948604	1.0	13269	tags=32%, list=24%, signal=42%
GO_CYCLIN_DEPENDENT_PROTEIN_KINASE_ACTIVITY	GO_CYCLIN_DEPENDENT_PROTEIN_KINASE_ACTIVITY		34	0.28865653	0.82110053	0.7307692	0.99505395	1.0	15819	tags=44%, list=29%, signal=62%
GO_CELLULAR_RESPONSE_TO_GLUCAGON_STIMULUS	GO_CELLULAR_RESPONSE_TO_GLUCAGON_STIMULUS		38	0.26108694	0.82077646	0.84934086	0.995131	1.0	12401	tags=39%, list=23%, signal=51%
GO_RNA_POLYMERASE_II_REPRESSING_TRANSCRIPTION_FACTOR_BINDING	GO_RNA_POLYMERASE_II_REPRESSING_TRANSCRIPTION_FACTOR_BINDING		27	0.28599554	0.8199544	0.7726358	0.99632525	1.0	16752	tags=56%, list=31%, signal=80%
GO_MALE_MEIOSIS	GO_MALE_MEIOSIS		34	0.28852952	0.8194695	0.7798861	0.9967912	1.0	14166	tags=44%, list=26%, signal=60%
GO_RNA_DESTABILIZATION	GO_RNA_DESTABILIZATION		15	0.34584793	0.81946886	0.7029126	0.9960857	1.0	13671	tags=47%, list=25%, signal=62%
GO_GLYCOSYL_COMPOUND_CATABOLIC_PROCESS	GO_GLYCOSYL_COMPOUND_CATABOLIC_PROCESS		41	0.2819039	0.81859976	0.7674858	0.9973794	1.0	7649	tags=22%, list=14%, signal=26%
GO_PHOSPHATE_ION_TRANSPORT	GO_PHOSPHATE_ION_TRANSPORT		18	0.3509133	0.81859237	0.6920078	0.9966886	1.0	9867	tags=33%, list=18%, signal=41%
GO_DENDRITIC_CELL_CHEMOTAXIS	GO_DENDRITIC_CELL_CHEMOTAXIS		16	0.33339906	0.8183009	0.747495	0.996684	1.0	7371	tags=25%, list=14%, signal=29%
GO_TUBE_FORMATION	GO_TUBE_FORMATION		129	0.2472768	0.8178854	0.79118776	0.9969237	1.0	14496	tags=40%, list=27%, signal=55%
GO_SYNAPTONEMAL_COMPLEX	GO_SYNAPTONEMAL_COMPLEX		35	0.30168483	0.81780374	0.7588126	0.9964032	1.0	13514	tags=43%, list=25%, signal=57%
GO_LEUKOCYTE_PROLIFERATION	GO_LEUKOCYTE_PROLIFERATION		87	0.24318035	0.8175487	0.8424125	0.99625415	1.0	8283	tags=21%, list=15%, signal=24%
GO_POSITIVE_REGULATION_OF_PEPTIDE_SECRETION	GO_POSITIVE_REGULATION_OF_PEPTIDE_SECRETION		89	0.25554532	0.8174713	0.85818183	0.99572617	1.0	10296	tags=30%, list=19%, signal=37%
GO_ERYTHROCYTE_DEVELOPMENT	GO_ERYTHROCYTE_DEVELOPMENT		22	0.28768894	0.81646585	0.80626225	0.9973557	1.0	12007	tags=36%, list=22%, signal=47%
GO_POST_GOLGI_VESICLE_MEDIATED_TRANSPORT	GO_POST_GOLGI_VESICLE_MEDIATED_TRANSPORT		83	0.24336663	0.816291	0.80353636	0.9970396	1.0	10485	tags=23%, list=19%, signal=28%
GO_POSITIVE_REGULATION_OF_CATABOLIC_PROCESS	GO_POSITIVE_REGULATION_OF_CATABOLIC_PROCESS		389	0.21275721	0.81536514	0.8988327	0.99851394	1.0	13677	tags=33%, list=25%, signal=44%
GO_REGULATION_OF_MACROPHAGE_ACTIVATION	GO_REGULATION_OF_MACROPHAGE_ACTIVATION		26	0.28549078	0.81533366	0.83233535	0.99788547	1.0	12539	tags=31%, list=23%, signal=40%
GO_PROTEIN_PHOSPHATASE_2A_BINDING	GO_PROTEIN_PHOSPHATASE_2A_BINDING		28	0.2720675	0.81521845	0.78277886	0.99744004	1.0	16792	tags=46%, list=31%, signal=67%
GO_REGULATION_OF_RECEPTOR_INTERNALIZATION	GO_REGULATION_OF_RECEPTOR_INTERNALIZATION		37	0.26343432	0.81516135	0.86730766	0.99687153	1.0	14346	tags=43%, list=26%, signal=59%
GO_BICELLULAR_TIGHT_JUNCTION_ASSEMBLY	GO_BICELLULAR_TIGHT_JUNCTION_ASSEMBLY		32	0.30104905	0.8151423	0.7072243	0.9962193	1.0	9517	tags=25%, list=18%, signal=30%
GO_INTERFERON_GAMMA_MEDIATED_SIGNALING_PATHWAY	GO_INTERFERON_GAMMA_MEDIATED_SIGNALING_PATHWAY		68	0.33561644	0.8148164	0.68115944	0.99630535	1.0	13637	tags=44%, list=25%, signal=59%
GO_ESTABLISHMENT_OF_EPITHELIAL_CELL_POLARITY	GO_ESTABLISHMENT_OF_EPITHELIAL_CELL_POLARITY		22	0.30618563	0.81469554	0.76360226	0.995869	1.0	3712	tags=23%, list=7%, signal=24%
GO_PHOSPHATIDYLINOSITOL_3_KINASE_COMPLEX	GO_PHOSPHATIDYLINOSITOL_3_KINASE_COMPLEX		20	0.29039222	0.814211	0.80350196	0.9963199	1.0	12033	tags=40%, list=22%, signal=51%
GO_NLS_BEARING_PROTEIN_IMPORT_INTO_NUCLEUS	GO_NLS_BEARING_PROTEIN_IMPORT_INTO_NUCLEUS		22	0.3261309	0.8138817	0.706	0.99638736	1.0	10235	tags=45%, list=19%, signal=56%
GO_REGULATION_OF_REACTIVE_OXYGEN_SPECIES_METABOLIC_PROCESS	GO_REGULATION_OF_REACTIVE_OXYGEN_SPECIES_METABOLIC_PROCESS		150	0.22986801	0.8136515	0.93385214	0.99621546	1.0	8477	tags=23%, list=16%, signal=28%
GO_AMINO_ACID_TRANSMEMBRANE_TRANSPORTER_ACTIVITY	GO_AMINO_ACID_TRANSMEMBRANE_TRANSPORTER_ACTIVITY		77	0.26818123	0.8135133	0.8107607	0.99581707	1.0	10129	tags=32%, list=19%, signal=40%
GO_MITOTIC_DNA_INTEGRITY_CHECKPOINT	GO_MITOTIC_DNA_INTEGRITY_CHECKPOINT		97	0.2735921	0.8133631	0.71370965	0.99548227	1.0	11781	tags=32%, list=22%, signal=41%
GO_NEGATIVE_REGULATION_OF_PEPTIDYL_TYROSINE_PHOSPHORYLATION	GO_NEGATIVE_REGULATION_OF_PEPTIDYL_TYROSINE_PHOSPHORYLATION		38	0.27329054	0.8125543	0.8064516	0.9966971	1.0	14002	tags=47%, list=26%, signal=64%
GO_PROTEIN_LOCALIZATION_TO_CILIUM	GO_PROTEIN_LOCALIZATION_TO_CILIUM		25	0.30673274	0.8118621	0.7449799	0.997625	1.0	11928	tags=40%, list=22%, signal=51%
GO_ALPHA_BETA_T_CELL_ACTIVATION	GO_ALPHA_BETA_T_CELL_ACTIVATION		54	0.2665349	0.8118368	0.85328186	0.9969924	1.0	8628	tags=28%, list=16%, signal=33%
GO_NEGATIVE_REGULATION_OF_BIOMINERAL_TISSUE_DEVELOPMENT	GO_NEGATIVE_REGULATION_OF_BIOMINERAL_TISSUE_DEVELOPMENT		19	0.3151561	0.8112549	0.77642274	0.99765825	1.0	16380	tags=58%, list=30%, signal=83%
GO_CHEMOSENSORY_BEHAVIOR	GO_CHEMOSENSORY_BEHAVIOR		15	0.35190266	0.81122446	0.74951077	0.9970366	1.0	14721	tags=53%, list=27%, signal=73%
GO_REGULATION_OF_NEUTROPHIL_MIGRATION	GO_REGULATION_OF_NEUTROPHIL_MIGRATION		31	0.29425797	0.8108977	0.76996195	0.9971211	1.0	14684	tags=39%, list=27%, signal=53%
GO_REGULATION_OF_ERBB_SIGNALING_PATHWAY	GO_REGULATION_OF_ERBB_SIGNALING_PATHWAY		80	0.25637954	0.8108879	0.79881656	0.9964548	1.0	14260	tags=40%, list=26%, signal=54%
GO_REGULATION_OF_SYNAPTIC_TRANSMISSION_DOPAMINERGIC	GO_REGULATION_OF_SYNAPTIC_TRANSMISSION_DOPAMINERGIC		17	0.30998483	0.8106913	0.8057692	0.99620056	1.0	13062	tags=47%, list=24%, signal=62%
GO_MEIOTIC_CELL_CYCLE_PROCESS	GO_MEIOTIC_CELL_CYCLE_PROCESS		145	0.2511876	0.8104721	0.77290076	0.99597645	1.0	15614	tags=41%, list=29%, signal=57%
GO_MEIOTIC_CHROMOSOME_SEGREGATION	GO_MEIOTIC_CHROMOSOME_SEGREGATION		61	0.27592447	0.80950886	0.78515625	0.99748045	1.0	15488	tags=41%, list=29%, signal=57%
GO_MODIFIED_AMINO_ACID_TRANSPORT	GO_MODIFIED_AMINO_ACID_TRANSPORT		26	0.32169285	0.8085567	0.730916	0.9989435	1.0	7340	tags=35%, list=14%, signal=40%
GO_RESPONSE_TO_STARVATION	GO_RESPONSE_TO_STARVATION		151	0.22536406	0.80804706	0.9258555	0.99942917	1.0	11580	tags=27%, list=21%, signal=34%
GO_FUCOSYLATION	GO_FUCOSYLATION		23	0.31658402	0.8073038	0.7801147	1.0	1.0	8178	tags=35%, list=15%, signal=41%
GO_LIMBIC_SYSTEM_DEVELOPMENT	GO_LIMBIC_SYSTEM_DEVELOPMENT		100	0.25155026	0.80713373	0.8455744	1.0	1.0	12163	tags=35%, list=22%, signal=45%
GO_OVULATION_CYCLE_PROCESS	GO_OVULATION_CYCLE_PROCESS		87	0.23455729	0.8068055	0.91821563	1.0	1.0	12055	tags=32%, list=22%, signal=41%
GO_EPITHELIAL_CELL_FATE_COMMITMENT	GO_EPITHELIAL_CELL_FATE_COMMITMENT		15	0.33498338	0.80642885	0.7448015	1.0	1.0	5188	tags=27%, list=10%, signal=29%
GO_TRANS_GOLGI_NETWORK	GO_TRANS_GOLGI_NETWORK		183	0.23032396	0.80634534	0.8618677	0.9998029	1.0	13621	tags=36%, list=25%, signal=47%
GO_NEGATIVE_REGULATION_OF_MITOCHONDRION_ORGANIZATION	GO_NEGATIVE_REGULATION_OF_MITOCHONDRION_ORGANIZATION		37	0.25171274	0.80588967	0.86319846	1.0	1.0	7581	tags=24%, list=14%, signal=28%
GO_NADH_DEHYDROGENASE_COMPLEX	GO_NADH_DEHYDROGENASE_COMPLEX		42	0.31448388	0.80566823	0.7157464	0.99992734	1.0	9698	tags=31%, list=18%, signal=38%
GO_GLYCEROLIPID_METABOLIC_PROCESS	GO_GLYCEROLIPID_METABOLIC_PROCESS		353	0.2196297	0.8045871	0.9300567	1.0	1.0	11290	tags=28%, list=21%, signal=36%
GO_CELLULAR_RESPONSE_TO_VIRUS	GO_CELLULAR_RESPONSE_TO_VIRUS		22	0.3104724	0.8044904	0.7504951	1.0	1.0	11081	tags=32%, list=20%, signal=40%
GO_REGULATION_OF_INTRACELLULAR_PROTEIN_TRANSPORT	GO_REGULATION_OF_INTRACELLULAR_PROTEIN_TRANSPORT		371	0.21135014	0.8043163	0.97109824	1.0	1.0	14435	tags=35%, list=27%, signal=47%
GO_BRUSH_BORDER	GO_BRUSH_BORDER		102	0.24797568	0.8041545	0.85877866	1.0	1.0	9704	tags=27%, list=18%, signal=33%
GO_NEURAL_NUCLEUS_DEVELOPMENT	GO_NEURAL_NUCLEUS_DEVELOPMENT		66	0.258148	0.80370396	0.82592595	1.0	1.0	14183	tags=39%, list=26%, signal=53%
GO_POSITIVE_REGULATION_OF_INTERFERON_ALPHA_PRODUCTION	GO_POSITIVE_REGULATION_OF_INTERFERON_ALPHA_PRODUCTION		16	0.33883962	0.80354357	0.71398747	1.0	1.0	14597	tags=50%, list=27%, signal=68%
GO_HEART_TRABECULA_MORPHOGENESIS	GO_HEART_TRABECULA_MORPHOGENESIS		25	0.296973	0.80242854	0.77380955	1.0	1.0	5241	tags=28%, list=10%, signal=31%
GO_PROTEIN_K11_LINKED_UBIQUITINATION	GO_PROTEIN_K11_LINKED_UBIQUITINATION		27	0.3042869	0.80234206	0.7410359	1.0	1.0	16712	tags=44%, list=31%, signal=64%
GO_NEGATIVE_REGULATION_OF_NF_KAPPAB_IMPORT_INTO_NUCLEUS	GO_NEGATIVE_REGULATION_OF_NF_KAPPAB_IMPORT_INTO_NUCLEUS		18	0.31870982	0.8023052	0.74224806	1.0	1.0	8283	tags=28%, list=15%, signal=33%
GO_REGULATION_OF_CARBOHYDRATE_CATABOLIC_PROCESS	GO_REGULATION_OF_CARBOHYDRATE_CATABOLIC_PROCESS		41	0.25897732	0.80063474	0.8717949	1.0	1.0	12399	tags=34%, list=23%, signal=44%
GO_MULTI_ORGANISM_BEHAVIOR	GO_MULTI_ORGANISM_BEHAVIOR		73	0.24664225	0.8005764	0.89502764	1.0	1.0	9833	tags=27%, list=18%, signal=33%
GO_REGULATION_OF_CELL_ADHESION_MEDIATED_BY_INTEGRIN	GO_REGULATION_OF_CELL_ADHESION_MEDIATED_BY_INTEGRIN		39	0.27650276	0.8001956	0.82056075	1.0	1.0	4961	tags=18%, list=9%, signal=20%
GO_REGULATION_OF_EPIDERMAL_CELL_DIFFERENTIATION	GO_REGULATION_OF_EPIDERMAL_CELL_DIFFERENTIATION		43	0.2838436	0.798909	0.80080485	1.0	1.0	13286	tags=42%, list=24%, signal=55%
GO_PROTON_TRANSPORTING_TWO_SECTOR_ATPASE_COMPLEX	GO_PROTON_TRANSPORTING_TWO_SECTOR_ATPASE_COMPLEX		47	0.28817418	0.798799	0.76796716	1.0	1.0	12936	tags=40%, list=24%, signal=53%
GO_REGULATION_OF_PROTEIN_COMPLEX_DISASSEMBLY	GO_REGULATION_OF_PROTEIN_COMPLEX_DISASSEMBLY		210	0.24760395	0.7987286	0.76796716	1.0	1.0	16677	tags=44%, list=31%, signal=63%
GO_NEUROTROPHIN_TRK_RECEPTOR_SIGNALING_PATHWAY	GO_NEUROTROPHIN_TRK_RECEPTOR_SIGNALING_PATHWAY		15	0.30429545	0.798243	0.8020408	1.0	1.0	11906	tags=40%, list=22%, signal=51%
GO_REGULATION_OF_CELL_CYCLE_ARREST	GO_REGULATION_OF_CELL_CYCLE_ARREST		104	0.25503483	0.7979197	0.7677543	1.0	1.0	11580	tags=30%, list=21%, signal=38%
GO_REGULATION_OF_MEMBRANE_PERMEABILITY	GO_REGULATION_OF_MEMBRANE_PERMEABILITY		69	0.24436937	0.79702365	0.8116233	1.0	1.0	9869	tags=23%, list=18%, signal=28%
GO_INTRINSIC_COMPONENT_OF_MITOCHONDRIAL_OUTER_MEMBRANE	GO_INTRINSIC_COMPONENT_OF_MITOCHONDRIAL_OUTER_MEMBRANE		21	0.2741925	0.79673344	0.8111332	1.0	1.0	9857	tags=29%, list=18%, signal=35%
GO_KERATINOCYTE_DIFFERENTIATION	GO_KERATINOCYTE_DIFFERENTIATION		101	0.25298896	0.7961994	0.8695652	1.0	1.0	13486	tags=34%, list=25%, signal=45%
GO_REGULATION_OF_NEURONAL_SYNAPTIC_PLASTICITY	GO_REGULATION_OF_NEURONAL_SYNAPTIC_PLASTICITY		47	0.26956594	0.7955263	0.8284133	1.0	1.0	8557	tags=26%, list=16%, signal=30%
GO_AUTOPHAGY	GO_AUTOPHAGY		376	0.20832705	0.79480904	0.972549	1.0	1.0	15632	tags=38%, list=29%, signal=53%
GO_PROTEIN_HOMOTETRAMERIZATION	GO_PROTEIN_HOMOTETRAMERIZATION		59	0.24033588	0.7948059	0.91423005	1.0	1.0	10070	tags=24%, list=19%, signal=29%
GO_TRABECULA_FORMATION	GO_TRABECULA_FORMATION		23	0.2868846	0.79422474	0.84540117	1.0	1.0	11652	tags=39%, list=21%, signal=50%
GO_MUSCLE_CELL_PROLIFERATION	GO_MUSCLE_CELL_PROLIFERATION		18	0.30187896	0.79414076	0.77163905	1.0	1.0	14666	tags=50%, list=27%, signal=68%
GO_SYNAPTIC_VESICLE_LOCALIZATION	GO_SYNAPTIC_VESICLE_LOCALIZATION		101	0.24540253	0.7934469	0.8976378	1.0	1.0	10394	tags=28%, list=19%, signal=34%
GO_EXPLORATION_BEHAVIOR	GO_EXPLORATION_BEHAVIOR		23	0.31348532	0.7933665	0.83173996	1.0	1.0	6741	tags=30%, list=12%, signal=35%
GO_GAS_TRANSPORT	GO_GAS_TRANSPORT		19	0.33093044	0.79298973	0.73142856	1.0	1.0	9801	tags=32%, list=18%, signal=39%
GO_NEGATIVE_REGULATION_OF_EPITHELIAL_CELL_MIGRATION	GO_NEGATIVE_REGULATION_OF_EPITHELIAL_CELL_MIGRATION		52	0.2410276	0.79277056	0.89484125	1.0	1.0	9613	tags=27%, list=18%, signal=33%
GO_LYMPHOCYTE_APOPTOTIC_PROCESS	GO_LYMPHOCYTE_APOPTOTIC_PROCESS		18	0.31316835	0.79219663	0.790224	1.0	1.0	14260	tags=44%, list=26%, signal=60%
GO_TRANSLATION_REPRESSOR_ACTIVITY	GO_TRANSLATION_REPRESSOR_ACTIVITY		20	0.3023448	0.79187244	0.7663366	1.0	1.0	10943	tags=35%, list=20%, signal=44%
GO_CELLULAR_RESPONSE_TO_TOXIC_SUBSTANCE	GO_CELLULAR_RESPONSE_TO_TOXIC_SUBSTANCE		25	0.29504293	0.79185325	0.81117535	1.0	1.0	9802	tags=28%, list=18%, signal=34%
GO_SH3_DOMAIN_BINDING	GO_SH3_DOMAIN_BINDING		114	0.22532886	0.7915287	0.94280076	1.0	1.0	16397	tags=45%, list=30%, signal=64%
GO_GLOMERULAR_EPITHELIUM_DEVELOPMENT	GO_GLOMERULAR_EPITHELIUM_DEVELOPMENT		17	0.2977293	0.79064125	0.8472998	1.0	1.0	12531	tags=47%, list=23%, signal=61%
GO_RAC_GTPASE_BINDING	GO_RAC_GTPASE_BINDING		38	0.26702836	0.79037786	0.8090551	1.0	1.0	16269	tags=45%, list=30%, signal=64%
GO_NEGATIVE_REGULATION_OF_OSSIFICATION	GO_NEGATIVE_REGULATION_OF_OSSIFICATION		68	0.23359577	0.7900517	0.9808061	1.0	1.0	16380	tags=46%, list=30%, signal=65%
GO_INTRINSIC_COMPONENT_OF_ENDOPLASMIC_RETICULUM_MEMBRANE	GO_INTRINSIC_COMPONENT_OF_ENDOPLASMIC_RETICULUM_MEMBRANE		121	0.25442752	0.7898294	0.79133856	1.0	1.0	10719	tags=29%, list=20%, signal=36%
GO_SWI_SNF_SUPERFAMILY_TYPE_COMPLEX	GO_SWI_SNF_SUPERFAMILY_TYPE_COMPLEX		71	0.29474223	0.7897857	0.6957364	1.0	1.0	11806	tags=32%, list=22%, signal=41%
GO_REGULATION_OF_VIRAL_ENTRY_INTO_HOST_CELL	GO_REGULATION_OF_VIRAL_ENTRY_INTO_HOST_CELL		28	0.2865452	0.7897112	0.8069815	1.0	1.0	5905	tags=18%, list=11%, signal=20%
GO_NEGATIVE_REGULATION_OF_TOR_SIGNALING	GO_NEGATIVE_REGULATION_OF_TOR_SIGNALING		30	0.265152	0.7894494	0.8215686	1.0	1.0	16443	tags=43%, list=30%, signal=62%
GO_ANTIPORTER_ACTIVITY	GO_ANTIPORTER_ACTIVITY		71	0.25786456	0.78889555	0.8585086	1.0	1.0	7047	tags=20%, list=13%, signal=23%
GO_REGULATION_OF_HEMATOPOIETIC_PROGENITOR_CELL_DIFFERENTIATION	GO_REGULATION_OF_HEMATOPOIETIC_PROGENITOR_CELL_DIFFERENTIATION		40	0.28350052	0.7887861	0.7628459	1.0	1.0	12389	tags=33%, list=23%, signal=42%
GO_KERATIN_FILAMENT	GO_KERATIN_FILAMENT		92	0.24636896	0.7886555	0.82758623	1.0	1.0	11279	tags=26%, list=21%, signal=33%
GO_RESPONSE_TO_FOOD	GO_RESPONSE_TO_FOOD		19	0.2861768	0.7883791	0.8366142	1.0	1.0	6225	tags=21%, list=11%, signal=24%
GO_POSITIVE_REGULATION_OF_CELL_CYCLE	GO_POSITIVE_REGULATION_OF_CELL_CYCLE		323	0.22099148	0.7882325	0.8979206	1.0	1.0	10969	tags=27%, list=20%, signal=33%
GO_GOLGI_ORGANIZATION	GO_GOLGI_ORGANIZATION		84	0.23914465	0.7882306	0.8300781	1.0	1.0	9640	tags=25%, list=18%, signal=30%
GO_REGULATION_OF_N_METHYL_D_ASPARTATE_SELECTIVE_GLUTAMATE_RECEPTOR_ACTIVITY	GO_REGULATION_OF_N_METHYL_D_ASPARTATE_SELECTIVE_GLUTAMATE_RECEPTOR_ACTIVITY		15	0.31871048	0.7882282	0.8121442	1.0	1.0	5776	tags=27%, list=11%, signal=30%
GO_T_HELPER_1_TYPE_IMMUNE_RESPONSE	GO_T_HELPER_1_TYPE_IMMUNE_RESPONSE		19	0.3176295	0.78812116	0.8015873	1.0	1.0	9593	tags=37%, list=18%, signal=45%
GO_RESPONSE_TO_COPPER_ION	GO_RESPONSE_TO_COPPER_ION		27	0.2696404	0.78804237	0.87258685	1.0	1.0	10582	tags=33%, list=19%, signal=41%
GO_APOPTOTIC_DNA_FRAGMENTATION	GO_APOPTOTIC_DNA_FRAGMENTATION		15	0.32589746	0.7878089	0.73203886	1.0	1.0	16133	tags=60%, list=30%, signal=85%
GO_PROTEIN_PHOSPHATASE_BINDING	GO_PROTEIN_PHOSPHATASE_BINDING		119	0.23302506	0.7875833	0.86507934	1.0	1.0	13431	tags=36%, list=25%, signal=48%
GO_NEGATIVE_REGULATION_OF_CELL_CYCLE_G1_S_PHASE_TRANSITION	GO_NEGATIVE_REGULATION_OF_CELL_CYCLE_G1_S_PHASE_TRANSITION		96	0.25269237	0.785756	0.76620823	1.0	1.0	11781	tags=33%, list=22%, signal=43%
GO_RENAL_WATER_HOMEOSTASIS	GO_RENAL_WATER_HOMEOSTASIS		34	0.27817196	0.7856823	0.8424125	1.0	1.0	8966	tags=32%, list=17%, signal=39%
GO_SPINDLE_LOCALIZATION	GO_SPINDLE_LOCALIZATION		37	0.2836969	0.78564733	0.75206614	1.0	1.0	10442	tags=30%, list=19%, signal=37%
GO_ONE_CARBON_METABOLIC_PROCESS	GO_ONE_CARBON_METABOLIC_PROCESS		37	0.28385213	0.78562737	0.8040816	1.0	1.0	11830	tags=35%, list=22%, signal=45%
GO_L_ALPHA_AMINO_ACID_TRANSMEMBRANE_TRANSPORT	GO_L_ALPHA_AMINO_ACID_TRANSMEMBRANE_TRANSPORT		31	0.30722487	0.78552186	0.81854045	1.0	1.0	10129	tags=35%, list=19%, signal=44%
GO_NUCLEOTIDE_SUGAR_METABOLIC_PROCESS	GO_NUCLEOTIDE_SUGAR_METABOLIC_PROCESS		33	0.28636566	0.78527117	0.7828685	1.0	1.0	11576	tags=33%, list=21%, signal=42%
GO_POSITIVE_REGULATION_OF_JUN_KINASE_ACTIVITY	GO_POSITIVE_REGULATION_OF_JUN_KINASE_ACTIVITY		61	0.23543765	0.7845491	0.9114391	1.0	1.0	8803	tags=23%, list=16%, signal=27%
GO_NEGATIVE_REGULATION_OF_TISSUE_REMODELING	GO_NEGATIVE_REGULATION_OF_TISSUE_REMODELING		17	0.3032269	0.78438765	0.84842885	1.0	1.0	11385	tags=41%, list=21%, signal=52%
GO_MITOTIC_CYTOKINESIS	GO_MITOTIC_CYTOKINESIS		31	0.3005399	0.78284967	0.72008115	1.0	1.0	10231	tags=29%, list=19%, signal=36%
GO_PROLINE_RICH_REGION_BINDING	GO_PROLINE_RICH_REGION_BINDING		18	0.30252182	0.78236866	0.77176017	1.0	1.0	9348	tags=33%, list=17%, signal=40%
GO_ACTIN_POLYMERIZATION_OR_DEPOLYMERIZATION	GO_ACTIN_POLYMERIZATION_OR_DEPOLYMERIZATION		36	0.2545458	0.7820012	0.86380595	1.0	1.0	6466	tags=22%, list=12%, signal=25%
GO_POSITIVE_REGULATION_OF_PROTEOLYSIS	GO_POSITIVE_REGULATION_OF_PROTEOLYSIS		360	0.20448996	0.78199077	0.9590643	1.0	1.0	14346	tags=35%, list=26%, signal=47%
GO_CELLULAR_RESPONSE_TO_CALCIUM_ION	GO_CELLULAR_RESPONSE_TO_CALCIUM_ION		47	0.24322124	0.78107345	0.91588783	1.0	1.0	10928	tags=26%, list=20%, signal=32%
GO_POLYUBIQUITIN_BINDING	GO_POLYUBIQUITIN_BINDING		41	0.2461207	0.7809305	0.8717435	1.0	1.0	14221	tags=29%, list=26%, signal=40%
GO_MAINTENANCE_OF_LOCATION_IN_CELL	GO_MAINTENANCE_OF_LOCATION_IN_CELL		94	0.22310111	0.78090876	0.91682786	1.0	1.0	12181	tags=31%, list=22%, signal=40%
GO_HSP90_PROTEIN_BINDING	GO_HSP90_PROTEIN_BINDING		27	0.2688527	0.78060603	0.8515625	1.0	1.0	15779	tags=52%, list=29%, signal=73%
GO_KERATINIZATION	GO_KERATINIZATION		50	0.27725258	0.78040636	0.8292683	1.0	1.0	12398	tags=30%, list=23%, signal=39%
GO_DNA_METHYLATION_OR_DEMETHYLATION	GO_DNA_METHYLATION_OR_DEMETHYLATION		57	0.27880844	0.780026	0.79417473	1.0	1.0	11002	tags=28%, list=20%, signal=35%
GO_ERBB_SIGNALING_PATHWAY	GO_ERBB_SIGNALING_PATHWAY		78	0.22983718	0.7799709	0.9366603	1.0	1.0	13587	tags=36%, list=25%, signal=48%
GO_MEMBRANE_LIPID_METABOLIC_PROCESS	GO_MEMBRANE_LIPID_METABOLIC_PROCESS		183	0.22643927	0.7799464	0.9087221	1.0	1.0	10517	tags=25%, list=19%, signal=31%
GO_POSITIVE_REGULATION_OF_CELL_CYCLE_G2_M_PHASE_TRANSITION	GO_POSITIVE_REGULATION_OF_CELL_CYCLE_G2_M_PHASE_TRANSITION		18	0.32158148	0.779748	0.76861167	1.0	1.0	8500	tags=33%, list=16%, signal=40%
GO_ASTROCYTE_DEVELOPMENT	GO_ASTROCYTE_DEVELOPMENT		19	0.28451028	0.7796357	0.896488	1.0	1.0	14243	tags=42%, list=26%, signal=57%
GO_NEGATIVE_REGULATION_OF_OSTEOBLAST_DIFFERENTIATION	GO_NEGATIVE_REGULATION_OF_OSTEOBLAST_DIFFERENTIATION		40	0.2661071	0.77891284	0.907197	1.0	1.0	12223	tags=35%, list=23%, signal=45%
GO_TOLL_LIKE_RECEPTOR_4_SIGNALING_PATHWAY	GO_TOLL_LIKE_RECEPTOR_4_SIGNALING_PATHWAY		18	0.30437386	0.7785942	0.79881656	1.0	1.0	4519	tags=17%, list=8%, signal=18%
GO_RAB_GTPASE_BINDING	GO_RAB_GTPASE_BINDING		119	0.23440504	0.7784856	0.846	1.0	1.0	11691	tags=29%, list=22%, signal=36%
GO_IMMUNE_EFFECTOR_PROCESS	GO_IMMUNE_EFFECTOR_PROCESS		477	0.22218825	0.77750295	0.943662	1.0	1.0	10652	tags=25%, list=20%, signal=31%
GO_EARLY_ENDOSOME_MEMBRANE	GO_EARLY_ENDOSOME_MEMBRANE		107	0.2430229	0.7770973	0.8476954	1.0	1.0	6942	tags=20%, list=13%, signal=22%
GO_NUCLEOSOME_BINDING	GO_NUCLEOSOME_BINDING		45	0.28421947	0.7768717	0.73203886	1.0	1.0	12548	tags=33%, list=23%, signal=43%
GO_REGULATION_OF_SYNCYTIUM_FORMATION_BY_PLASMA_MEMBRANE_FUSION	GO_REGULATION_OF_SYNCYTIUM_FORMATION_BY_PLASMA_MEMBRANE_FUSION		23	0.2890709	0.7768701	0.87890625	1.0	1.0	6461	tags=17%, list=12%, signal=20%
GO_ION_ANTIPORTER_ACTIVITY	GO_ION_ANTIPORTER_ACTIVITY		46	0.2626221	0.77682424	0.8503937	1.0	1.0	15852	tags=41%, list=29%, signal=58%
GO_CYTOSKELETON_DEPENDENT_CYTOKINESIS	GO_CYTOSKELETON_DEPENDENT_CYTOKINESIS		39	0.28691274	0.77619714	0.7366255	1.0	1.0	16752	tags=46%, list=31%, signal=67%
GO_DICARBOXYLIC_ACID_CATABOLIC_PROCESS	GO_DICARBOXYLIC_ACID_CATABOLIC_PROCESS		16	0.3090367	0.77599466	0.790927	1.0	1.0	10124	tags=38%, list=19%, signal=46%
GO_REGULATION_OF_DNA_RECOMBINATION	GO_REGULATION_OF_DNA_RECOMBINATION		54	0.26717752	0.77577597	0.8020202	1.0	1.0	12148	tags=30%, list=22%, signal=38%
GO_ACTIN_MONOMER_BINDING	GO_ACTIN_MONOMER_BINDING		25	0.28022826	0.77575433	0.8466135	1.0	1.0	11428	tags=36%, list=21%, signal=46%
GO_ADA2_GCN5_ADA3_TRANSCRIPTION_ACTIVATOR_COMPLEX	GO_ADA2_GCN5_ADA3_TRANSCRIPTION_ACTIVATOR_COMPLEX		15	0.33323458	0.7753374	0.75097275	1.0	1.0	17551	tags=60%, list=32%, signal=89%
GO_CHROMATIN_DNA_BINDING	GO_CHROMATIN_DNA_BINDING		80	0.24947378	0.7748752	0.8194175	1.0	1.0	12837	tags=33%, list=24%, signal=43%
GO_COLUMNAR_CUBOIDAL_EPITHELIAL_CELL_DEVELOPMENT	GO_COLUMNAR_CUBOIDAL_EPITHELIAL_CELL_DEVELOPMENT		48	0.24295205	0.77418417	0.9080675	1.0	1.0	13947	tags=35%, list=26%, signal=48%
GO_REGULATION_OF_PROTEIN_AUTOPHOSPHORYLATION	GO_REGULATION_OF_PROTEIN_AUTOPHOSPHORYLATION		36	0.2598091	0.7732716	0.8730769	1.0	1.0	13317	tags=36%, list=25%, signal=48%
GO_FLUID_TRANSPORT	GO_FLUID_TRANSPORT		27	0.2993642	0.77311766	0.8712121	1.0	1.0	12157	tags=44%, list=22%, signal=57%
GO_SMALL_MOLECULE_BIOSYNTHETIC_PROCESS	GO_SMALL_MOLECULE_BIOSYNTHETIC_PROCESS		436	0.2257785	0.7728629	0.8979206	1.0	1.0	11952	tags=27%, list=22%, signal=35%
GO_ALCOHOL_CATABOLIC_PROCESS	GO_ALCOHOL_CATABOLIC_PROCESS		58	0.25352353	0.7726404	0.8204633	1.0	1.0	9565	tags=26%, list=18%, signal=31%
GO_NEGATIVE_REGULATION_OF_MACROAUTOPHAGY	GO_NEGATIVE_REGULATION_OF_MACROAUTOPHAGY		22	0.28780344	0.7725047	0.8257426	1.0	1.0	9207	tags=32%, list=17%, signal=38%
GO_REGULATION_OF_SYNAPTIC_TRANSMISSION_GABAERGIC	GO_REGULATION_OF_SYNAPTIC_TRANSMISSION_GABAERGIC		29	0.2805237	0.7719188	0.8685259	1.0	1.0	13053	tags=45%, list=24%, signal=59%
GO_HISTONE_ACETYLTRANSFERASE_BINDING	GO_HISTONE_ACETYLTRANSFERASE_BINDING		28	0.28459495	0.770633	0.8032454	1.0	1.0	11975	tags=43%, list=22%, signal=55%
GO_CLATHRIN_COATED_VESICLE_MEMBRANE	GO_CLATHRIN_COATED_VESICLE_MEMBRANE		79	0.25829485	0.7706228	0.8684211	1.0	1.0	10485	tags=30%, list=19%, signal=38%
GO_HYALURONAN_METABOLIC_PROCESS	GO_HYALURONAN_METABOLIC_PROCESS		30	0.2771645	0.77054125	0.87666035	1.0	1.0	6075	tags=20%, list=11%, signal=23%
GO_INTRACELLULAR_LIPID_TRANSPORT	GO_INTRACELLULAR_LIPID_TRANSPORT		20	0.29408127	0.7696186	0.8003914	1.0	1.0	2367	tags=15%, list=4%, signal=16%
GO_POSITIVE_REGULATION_OF_PROTEIN_LOCALIZATION_TO_CELL_PERIPHERY	GO_POSITIVE_REGULATION_OF_PROTEIN_LOCALIZATION_TO_CELL_PERIPHERY		36	0.2408795	0.76961017	0.9398496	1.0	1.0	13199	tags=39%, list=24%, signal=51%
GO_TRANSCRIPTIONAL_ACTIVATOR_ACTIVITY_RNA_POLYMERASE_II_CORE_PROMOTER_PROXIMAL_REGION_SEQUENCE_SPECIFIC_BINDING	GO_TRANSCRIPTIONAL_ACTIVATOR_ACTIVITY_RNA_POLYMERASE_II_CORE_PROMOTER_PROXIMAL_REGION_SEQUENCE_SPECIFIC_BINDING		225	0.22560506	0.7690156	0.9522059	1.0	1.0	13888	tags=35%, list=26%, signal=47%
GO_MYELIN_SHEATH	GO_MYELIN_SHEATH		162	0.22257127	0.7689906	0.9309665	1.0	1.0	10859	tags=28%, list=20%, signal=35%
GO_REGULATION_OF_ANTIGEN_RECEPTOR_MEDIATED_SIGNALING_PATHWAY	GO_REGULATION_OF_ANTIGEN_RECEPTOR_MEDIATED_SIGNALING_PATHWAY		38	0.2541109	0.7674341	0.9140625	1.0	1.0	13115	tags=34%, list=24%, signal=45%
GO_RESPONSE_TO_FUNGUS	GO_RESPONSE_TO_FUNGUS		52	0.26257402	0.767227	0.9122449	1.0	1.0	8047	tags=23%, list=15%, signal=27%
GO_POSITIVE_REGULATION_OF_CELL_CYCLE_ARREST	GO_POSITIVE_REGULATION_OF_CELL_CYCLE_ARREST		83	0.24859323	0.76715195	0.8079096	1.0	1.0	11580	tags=30%, list=21%, signal=38%
GO_CLATHRIN_COATED_ENDOCYTIC_VESICLE	GO_CLATHRIN_COATED_ENDOCYTIC_VESICLE		63	0.2660902	0.76626605	0.85110664	1.0	1.0	9593	tags=32%, list=18%, signal=39%
GO_RESPONSE_TO_ARSENIC_CONTAINING_SUBSTANCE	GO_RESPONSE_TO_ARSENIC_CONTAINING_SUBSTANCE		29	0.2722434	0.76618487	0.8410463	1.0	1.0	14055	tags=45%, list=26%, signal=60%
GO_CARBOHYDRATE_DERIVATIVE_TRANSPORTER_ACTIVITY	GO_CARBOHYDRATE_DERIVATIVE_TRANSPORTER_ACTIVITY		35	0.27844125	0.76604897	0.7972167	1.0	1.0	14507	tags=40%, list=27%, signal=55%
GO_GAMMA_TUBULIN_BINDING	GO_GAMMA_TUBULIN_BINDING		23	0.27916425	0.7660043	0.82703775	1.0	1.0	5966	tags=22%, list=11%, signal=24%
GO_APOPTOTIC_PROCESS_INVOLVED_IN_DEVELOPMENT	GO_APOPTOTIC_PROCESS_INVOLVED_IN_DEVELOPMENT		21	0.30751216	0.76563936	0.8651685	1.0	1.0	9932	tags=43%, list=18%, signal=52%
GO_AUTOPHAGOSOME	GO_AUTOPHAGOSOME		78	0.24021977	0.7651464	0.872211	1.0	1.0	14210	tags=36%, list=26%, signal=49%
GO_POSITIVE_REGULATION_OF_RESPONSE_TO_BIOTIC_STIMULUS	GO_POSITIVE_REGULATION_OF_RESPONSE_TO_BIOTIC_STIMULUS		40	0.2599227	0.76514035	0.8869396	1.0	1.0	15923	tags=48%, list=29%, signal=67%
GO_TRICARBOXYLIC_ACID_METABOLIC_PROCESS	GO_TRICARBOXYLIC_ACID_METABOLIC_PROCESS		37	0.2755376	0.7646862	0.7910156	1.0	1.0	14822	tags=46%, list=27%, signal=63%
GO_PROTEIN_LOCALIZATION_TO_VACUOLE	GO_PROTEIN_LOCALIZATION_TO_VACUOLE		44	0.2545655	0.7646358	0.8390342	1.0	1.0	10330	tags=30%, list=19%, signal=36%
GO_RECEPTOR_REGULATOR_ACTIVITY	GO_RECEPTOR_REGULATOR_ACTIVITY		45	0.23770443	0.76412135	0.98275864	1.0	1.0	15242	tags=44%, list=28%, signal=62%
GO_ESTABLISHMENT_OF_SPINDLE_ORIENTATION	GO_ESTABLISHMENT_OF_SPINDLE_ORIENTATION		25	0.2797006	0.7641028	0.833002	1.0	1.0	10442	tags=32%, list=19%, signal=40%
GO_POSITIVE_REGULATION_OF_NEUROLOGICAL_SYSTEM_PROCESS	GO_POSITIVE_REGULATION_OF_NEUROLOGICAL_SYSTEM_PROCESS		20	0.27303025	0.7640997	0.90943396	1.0	1.0	11707	tags=30%, list=22%, signal=38%
GO_NEGATIVE_REGULATION_OF_ENDOTHELIAL_CELL_MIGRATION	GO_NEGATIVE_REGULATION_OF_ENDOTHELIAL_CELL_MIGRATION		38	0.23984204	0.7639405	0.95098037	1.0	1.0	8904	tags=26%, list=16%, signal=31%
GO_ORGANELLE_MEMBRANE_FUSION	GO_ORGANELLE_MEMBRANE_FUSION		92	0.23777306	0.76368123	0.90215266	1.0	1.0	14266	tags=35%, list=26%, signal=47%
GO_MITOCHONDRION_LOCALIZATION	GO_MITOCHONDRION_LOCALIZATION		34	0.2502269	0.76339936	0.85404336	1.0	1.0	8169	tags=26%, list=15%, signal=31%
GO_14_3_3_PROTEIN_BINDING	GO_14_3_3_PROTEIN_BINDING		19	0.29842415	0.7633145	0.8095238	1.0	1.0	6626	tags=21%, list=12%, signal=24%
GO_NUCLEAR_CHROMATIN	GO_NUCLEAR_CHROMATIN		289	0.22739424	0.7633015	0.83170253	1.0	1.0	15294	tags=37%, list=28%, signal=51%
GO_POST_ANAL_TAIL_MORPHOGENESIS	GO_POST_ANAL_TAIL_MORPHOGENESIS		18	0.26690704	0.76289433	0.8901099	1.0	1.0	14346	tags=39%, list=26%, signal=53%
GO_CLATHRIN_COAT_OF_COATED_PIT	GO_CLATHRIN_COAT_OF_COATED_PIT		16	0.3258104	0.7625776	0.74489796	1.0	1.0	6819	tags=25%, list=13%, signal=29%
GO_NEGATIVE_REGULATION_OF_CELL_CYCLE_ARREST	GO_NEGATIVE_REGULATION_OF_CELL_CYCLE_ARREST		18	0.30088934	0.7625136	0.7992278	1.0	1.0	10520	tags=33%, list=19%, signal=41%
GO_REGULATION_OF_CELL_CYCLE_CHECKPOINT	GO_REGULATION_OF_CELL_CYCLE_CHECKPOINT		27	0.31516463	0.76222247	0.7726397	1.0	1.0	10096	tags=33%, list=19%, signal=41%
GO_UBIQUITIN_LIKE_PROTEIN_CONJUGATING_ENZYME_ACTIVITY	GO_UBIQUITIN_LIKE_PROTEIN_CONJUGATING_ENZYME_ACTIVITY		29	0.28893444	0.7621963	0.790099	0.99988455	1.0	16387	tags=45%, list=30%, signal=64%
GO_IRON_ION_BINDING	GO_IRON_ION_BINDING		160	0.23529449	0.76113194	0.92911875	1.0	1.0	11178	tags=26%, list=21%, signal=33%
GO_CALCIUM_ACTIVATED_POTASSIUM_CHANNEL_ACTIVITY	GO_CALCIUM_ACTIVATED_POTASSIUM_CHANNEL_ACTIVITY		17	0.28912395	0.7608722	0.8908382	1.0	1.0	8039	tags=29%, list=15%, signal=35%
GO_PEPTIDE_CATABOLIC_PROCESS	GO_PEPTIDE_CATABOLIC_PROCESS		23	0.26711378	0.76052547	0.87142855	1.0	1.0	10692	tags=30%, list=20%, signal=38%
GO_MALE_MEIOSIS_I	GO_MALE_MEIOSIS_I		16	0.30471766	0.7604681	0.804829	1.0	1.0	14166	tags=44%, list=26%, signal=59%
GO_OLFACTORY_RECEPTOR_ACTIVITY	GO_OLFACTORY_RECEPTOR_ACTIVITY		416	0.20256856	0.7601755	0.97167754	0.9999908	1.0	11162	tags=15%, list=21%, signal=19%
GO_ALPHA_BETA_T_CELL_DIFFERENTIATION	GO_ALPHA_BETA_T_CELL_DIFFERENTIATION		45	0.25500086	0.75936836	0.9527559	1.0	1.0	8628	tags=29%, list=16%, signal=34%
GO_NEGATIVE_REGULATION_OF_JNK_CASCADE	GO_NEGATIVE_REGULATION_OF_JNK_CASCADE		33	0.25823995	0.7592009	0.8745098	1.0	1.0	14002	tags=33%, list=26%, signal=45%
GO_PTERIDINE_CONTAINING_COMPOUND_METABOLIC_PROCESS	GO_PTERIDINE_CONTAINING_COMPOUND_METABOLIC_PROCESS		36	0.29309046	0.7586143	0.7831094	1.0	1.0	16287	tags=50%, list=30%, signal=71%
GO_CIRCADIAN_REGULATION_OF_GENE_EXPRESSION	GO_CIRCADIAN_REGULATION_OF_GENE_EXPRESSION		56	0.23325865	0.7586001	0.9302326	1.0	1.0	10187	tags=23%, list=19%, signal=29%
GO_NEGATIVE_REGULATION_OF_PROTEIN_COMPLEX_DISASSEMBLY	GO_NEGATIVE_REGULATION_OF_PROTEIN_COMPLEX_DISASSEMBLY		164	0.24144162	0.7581325	0.8258197	1.0	1.0	12405	tags=32%, list=23%, signal=41%
GO_REGULATION_OF_ISOTYPE_SWITCHING	GO_REGULATION_OF_ISOTYPE_SWITCHING		24	0.2670824	0.75756735	0.8747515	1.0	1.0	8283	tags=25%, list=15%, signal=29%
GO_POSITIVE_REGULATION_OF_MITOCHONDRIAL_OUTER_MEMBRANE_PERMEABILIZATION_INVOLVED_IN_APOPTOTIC_SIGNALING_PATHWAY	GO_POSITIVE_REGULATION_OF_MITOCHONDRIAL_OUTER_MEMBRANE_PERMEABILIZATION_INVOLVED_IN_APOPTOTIC_SIGNALING_PATHWAY		36	0.25663236	0.75701004	0.83265305	1.0	1.0	9869	tags=22%, list=18%, signal=27%
GO_REGULATION_OF_I_KAPPAB_KINASE_NF_KAPPAB_SIGNALING	GO_REGULATION_OF_I_KAPPAB_KINASE_NF_KAPPAB_SIGNALING		231	0.22086905	0.7566873	0.93542075	1.0	1.0	11987	tags=28%, list=22%, signal=35%
GO_SMALL_MOLECULE_CATABOLIC_PROCESS	GO_SMALL_MOLECULE_CATABOLIC_PROCESS		319	0.23827884	0.7565818	0.8339768	1.0	1.0	13916	tags=31%, list=26%, signal=41%
GO_REGULATION_OF_PROTEIN_ACETYLATION	GO_REGULATION_OF_PROTEIN_ACETYLATION		63	0.23849356	0.7564898	0.90192306	0.99960065	1.0	11899	tags=29%, list=22%, signal=37%
GO_ESTABLISHMENT_OF_LOCALIZATION_BY_MOVEMENT_ALONG_MICROTUBULE	GO_ESTABLISHMENT_OF_LOCALIZATION_BY_MOVEMENT_ALONG_MICROTUBULE		91	0.24636067	0.7563871	0.825	0.99913454	1.0	15014	tags=42%, list=28%, signal=58%
GO_POSITIVE_REGULATION_OF_CELL_CYCLE_PROCESS	GO_POSITIVE_REGULATION_OF_CELL_CYCLE_PROCESS		241	0.2196984	0.75610226	0.904943	0.99894637	1.0	13255	tags=32%, list=24%, signal=42%
GO_NEGATIVE_REGULATION_OF_HEMATOPOIETIC_PROGENITOR_CELL_DIFFERENTIATION	GO_NEGATIVE_REGULATION_OF_HEMATOPOIETIC_PROGENITOR_CELL_DIFFERENTIATION		24	0.30359283	0.7557853	0.7683168	0.9988128	1.0	12389	tags=38%, list=23%, signal=49%
GO_EPIDERMAL_CELL_DIFFERENTIATION	GO_EPIDERMAL_CELL_DIFFERENTIATION		142	0.22744296	0.7554805	0.9669261	0.99865776	1.0	13486	tags=34%, list=25%, signal=45%
GO_LATE_ENDOSOME_MEMBRANE	GO_LATE_ENDOSOME_MEMBRANE		94	0.24937987	0.7553843	0.8370672	0.9981981	1.0	14261	tags=34%, list=26%, signal=46%
GO_CYTOPLASMIC_MRNA_PROCESSING_BODY	GO_CYTOPLASMIC_MRNA_PROCESSING_BODY		65	0.26723024	0.7552652	0.808	0.9977544	1.0	10363	tags=28%, list=19%, signal=34%
GO_OSTEOCLAST_DIFFERENTIATION	GO_OSTEOCLAST_DIFFERENTIATION		28	0.27522781	0.7552287	0.84108526	0.9971903	1.0	15237	tags=43%, list=28%, signal=60%
GO_DYNEIN_BINDING	GO_DYNEIN_BINDING		26	0.24526243	0.7545131	0.9124514	0.997658	1.0	11017	tags=27%, list=20%, signal=34%
GO_OLIGODENDROCYTE_DIFFERENTIATION	GO_OLIGODENDROCYTE_DIFFERENTIATION		58	0.2368558	0.754485	0.9591078	0.99708396	1.0	8284	tags=22%, list=15%, signal=26%
GO_BASAL_PLASMA_MEMBRANE	GO_BASAL_PLASMA_MEMBRANE		32	0.28657505	0.7544653	0.83739835	0.99649215	1.0	13537	tags=44%, list=25%, signal=58%
GO_PROTEASOMAL_PROTEIN_CATABOLIC_PROCESS	GO_PROTEASOMAL_PROTEIN_CATABOLIC_PROCESS		266	0.21591957	0.7537742	0.9153226	0.9969059	1.0	15447	tags=37%, list=28%, signal=52%
GO_RESPONSE_TO_TUMOR_NECROSIS_FACTOR	GO_RESPONSE_TO_TUMOR_NECROSIS_FACTOR		227	0.21332687	0.75345635	0.97604793	0.9967321	1.0	13407	tags=31%, list=25%, signal=41%
GO_VACUOLAR_ACIDIFICATION	GO_VACUOLAR_ACIDIFICATION		15	0.29272354	0.7534175	0.81395346	0.996168	1.0	7865	tags=27%, list=14%, signal=31%
GO_DISRUPTION_OF_CELLS_OF_OTHER_ORGANISM	GO_DISRUPTION_OF_CELLS_OF_OTHER_ORGANISM		26	0.26702747	0.7527081	0.90248567	0.9966083	1.0	15029	tags=42%, list=28%, signal=58%
GO_REACTIVE_OXYGEN_SPECIES_METABOLIC_PROCESS	GO_REACTIVE_OXYGEN_SPECIES_METABOLIC_PROCESS		95	0.22722371	0.7526577	0.9672131	0.99606735	1.0	8036	tags=22%, list=15%, signal=26%
GO_INNATE_IMMUNE_RESPONSE_ACTIVATING_CELL_SURFACE_RECEPTOR_SIGNALING_PATHWAY	GO_INNATE_IMMUNE_RESPONSE_ACTIVATING_CELL_SURFACE_RECEPTOR_SIGNALING_PATHWAY		105	0.23825052	0.7522765	0.8382643	0.9960254	1.0	15237	tags=36%, list=28%, signal=50%
GO_RESPONSE_TO_MANGANESE_ION	GO_RESPONSE_TO_MANGANESE_ION		17	0.2866948	0.75203645	0.8839458	0.99577415	1.0	10526	tags=35%, list=19%, signal=44%
GO_CELLULAR_MODIFIED_AMINO_ACID_METABOLIC_PROCESS	GO_CELLULAR_MODIFIED_AMINO_ACID_METABOLIC_PROCESS		218	0.22621618	0.7514958	0.9348231	0.99594235	1.0	12499	tags=29%, list=23%, signal=37%
GO_T_CELL_HOMEOSTASIS	GO_T_CELL_HOMEOSTASIS		34	0.26719558	0.75126696	0.87848604	0.99568295	1.0	11825	tags=38%, list=22%, signal=49%
GO_RESPONSE_TO_ATP	GO_RESPONSE_TO_ATP		30	0.25369492	0.751179	0.91682786	0.99518704	1.0	13947	tags=37%, list=26%, signal=49%
GO_ENDOMEMBRANE_SYSTEM_ORGANIZATION	GO_ENDOMEMBRANE_SYSTEM_ORGANIZATION		457	0.19980255	0.75095296	0.9824903	0.9949239	1.0	10539	tags=24%, list=19%, signal=29%
GO_ORGANELLE_FUSION	GO_ORGANELLE_FUSION		125	0.22637789	0.7508798	0.9359223	0.9944233	1.0	14266	tags=33%, list=26%, signal=44%
GO_ORGANIC_ACID_BIOSYNTHETIC_PROCESS	GO_ORGANIC_ACID_BIOSYNTHETIC_PROCESS		264	0.2247154	0.7505368	0.9227872	0.99431205	1.0	10124	tags=24%, list=19%, signal=29%
GO_PYRIDOXAL_PHOSPHATE_BINDING	GO_PYRIDOXAL_PHOSPHATE_BINDING		48	0.26806164	0.75027347	0.85265225	0.99408597	1.0	16151	tags=48%, list=30%, signal=68%
GO_FC_EPSILON_RECEPTOR_SIGNALING_PATHWAY	GO_FC_EPSILON_RECEPTOR_SIGNALING_PATHWAY		141	0.23534939	0.7499876	0.8755102	0.99388635	1.0	12013	tags=28%, list=22%, signal=36%
GO_HYDRO_LYASE_ACTIVITY	GO_HYDRO_LYASE_ACTIVITY		49	0.2529998	0.74963444	0.87984496	0.993766	1.0	16924	tags=51%, list=31%, signal=74%
GO_REGULATION_OF_INTERLEUKIN_12_PRODUCTION	GO_REGULATION_OF_INTERLEUKIN_12_PRODUCTION		51	0.24548195	0.74886733	0.9459459	0.9942259	1.0	11081	tags=27%, list=20%, signal=34%
GO_MONOCYTE_DIFFERENTIATION	GO_MONOCYTE_DIFFERENTIATION		16	0.3025772	0.7483732	0.8185484	0.99432313	1.0	4963	tags=19%, list=9%, signal=21%
GO_NEGATIVE_REGULATION_OF_INTRACELLULAR_PROTEIN_TRANSPORT	GO_NEGATIVE_REGULATION_OF_INTRACELLULAR_PROTEIN_TRANSPORT		93	0.2176859	0.7481165	0.96705425	0.99405533	1.0	14039	tags=37%, list=26%, signal=49%
GO_CLATHRIN_COATED_ENDOCYTIC_VESICLE_MEMBRANE	GO_CLATHRIN_COATED_ENDOCYTIC_VESICLE_MEMBRANE		46	0.28576252	0.74809885	0.8200409	0.9934733	1.0	10485	tags=35%, list=19%, signal=43%
GO_FOLIC_ACID_CONTAINING_COMPOUND_METABOLIC_PROCESS	GO_FOLIC_ACID_CONTAINING_COMPOUND_METABOLIC_PROCESS		29	0.29606426	0.7477593	0.80422264	0.9933612	1.0	1318	tags=14%, list=2%, signal=14%
GO_RESPONSE_TO_INTERFERON_GAMMA	GO_RESPONSE_TO_INTERFERON_GAMMA		142	0.24952118	0.7477504	0.8742515	0.992767	1.0	13874	tags=37%, list=26%, signal=49%
GO_CELLULAR_RESPONSE_TO_INTERFERON_BETA	GO_CELLULAR_RESPONSE_TO_INTERFERON_BETA		15	0.3207954	0.74773526	0.7907445	0.99217397	1.0	5559	tags=20%, list=10%, signal=22%
GO_NEGATIVE_REGULATION_OF_NUCLEOCYTOPLASMIC_TRANSPORT	GO_NEGATIVE_REGULATION_OF_NUCLEOCYTOPLASMIC_TRANSPORT		70	0.23031655	0.7476909	0.9435798	0.9916207	1.0	14039	tags=39%, list=26%, signal=52%
GO_CALMODULIN_DEPENDENT_PROTEIN_KINASE_ACTIVITY	GO_CALMODULIN_DEPENDENT_PROTEIN_KINASE_ACTIVITY		28	0.2572661	0.74621546	0.88675624	0.9930419	1.0	15241	tags=36%, list=28%, signal=50%
GO_NEGATIVE_REGULATION_OF_ALPHA_BETA_T_CELL_DIFFERENTIATION	GO_NEGATIVE_REGULATION_OF_ALPHA_BETA_T_CELL_DIFFERENTIATION		15	0.2865147	0.7459587	0.87573963	0.9927828	1.0	15111	tags=40%, list=28%, signal=55%
GO_PEPTIDE_CROSS_LINKING	GO_PEPTIDE_CROSS_LINKING		56	0.2567357	0.74589795	0.96862745	0.99226147	1.0	12443	tags=34%, list=23%, signal=44%
GO_REGULATION_OF_SMOOTHENED_SIGNALING_PATHWAY	GO_REGULATION_OF_SMOOTHENED_SIGNALING_PATHWAY		62	0.26813897	0.745585	0.86346155	0.99208015	1.0	10025	tags=32%, list=18%, signal=40%
GO_CELLULAR_AMINO_ACID_BIOSYNTHETIC_PROCESS	GO_CELLULAR_AMINO_ACID_BIOSYNTHETIC_PROCESS		93	0.2520275	0.7453333	0.8503788	0.991843	1.0	16151	tags=42%, list=30%, signal=60%
GO_MICROBODY_LUMEN	GO_MICROBODY_LUMEN		45	0.27597448	0.7439184	0.805169	0.9932202	1.0	11358	tags=29%, list=21%, signal=37%
GO_NEGATIVE_REGULATION_OF_MEGAKARYOCYTE_DIFFERENTIATION	GO_NEGATIVE_REGULATION_OF_MEGAKARYOCYTE_DIFFERENTIATION		18	0.3322508	0.74289936	0.75782883	0.9940318	1.0	16181	tags=44%, list=30%, signal=63%
GO_REGULATION_OF_ORGANELLE_ASSEMBLY	GO_REGULATION_OF_ORGANELLE_ASSEMBLY		145	0.21722288	0.7428883	0.9173077	0.99343574	1.0	12049	tags=30%, list=22%, signal=38%
GO_POSITIVE_REGULATION_OF_EXTRINSIC_APOPTOTIC_SIGNALING_PATHWAY_VIA_DEATH_DOMAIN_RECEPTORS	GO_POSITIVE_REGULATION_OF_EXTRINSIC_APOPTOTIC_SIGNALING_PATHWAY_VIA_DEATH_DOMAIN_RECEPTORS		17	0.29544806	0.74286073	0.86027944	0.9928644	1.0	7345	tags=29%, list=14%, signal=34%
GO_PHOSPHATASE_BINDING	GO_PHOSPHATASE_BINDING		161	0.21841839	0.7425062	0.9358717	0.9927194	1.0	11558	tags=29%, list=21%, signal=36%
GO_OXIDOREDUCTASE_ACTIVITY_ACTING_ON_THE_CH_NH2_GROUP_OF_DONORS	GO_OXIDOREDUCTASE_ACTIVITY_ACTING_ON_THE_CH_NH2_GROUP_OF_DONORS		18	0.30804333	0.74138254	0.8121331	0.9936296	1.0	11358	tags=44%, list=21%, signal=56%
GO_PYRIMIDINE_NUCLEOSIDE_CATABOLIC_PROCESS	GO_PYRIMIDINE_NUCLEOSIDE_CATABOLIC_PROCESS		20	0.29561922	0.7395564	0.8577075	0.9954575	1.0	7649	tags=25%, list=14%, signal=29%
GO_STEROID_HORMONE_MEDIATED_SIGNALING_PATHWAY	GO_STEROID_HORMONE_MEDIATED_SIGNALING_PATHWAY		124	0.20537664	0.7393417	0.9941406	0.99512446	1.0	11914	tags=27%, list=22%, signal=34%
GO_PARAXIAL_MESODERM_DEVELOPMENT	GO_PARAXIAL_MESODERM_DEVELOPMENT		16	0.31603354	0.73906386	0.8313253	0.9948989	1.0	16586	tags=56%, list=31%, signal=81%
GO_ACTIVATION_OF_JUN_KINASE_ACTIVITY	GO_ACTIVATION_OF_JUN_KINASE_ACTIVITY		33	0.24505253	0.73888975	0.91477275	0.99452394	1.0	8660	tags=21%, list=16%, signal=25%
GO_POSITIVE_REGULATION_OF_INTERLEUKIN_12_PRODUCTION	GO_POSITIVE_REGULATION_OF_INTERLEUKIN_12_PRODUCTION		33	0.25360042	0.7388355	0.938343	0.9939896	1.0	4449	tags=15%, list=8%, signal=16%
GO_G1_DNA_DAMAGE_CHECKPOINT	GO_G1_DNA_DAMAGE_CHECKPOINT		71	0.25585532	0.7385046	0.798419	0.9938272	1.0	11781	tags=32%, list=22%, signal=41%
GO_REGULATION_OF_EXOSOMAL_SECRETION	GO_REGULATION_OF_EXOSOMAL_SECRETION		17	0.31018698	0.73782074	0.81338745	0.9940755	1.0	8333	tags=24%, list=15%, signal=28%
GO_NEUTROPHIL_MEDIATED_IMMUNITY	GO_NEUTROPHIL_MEDIATED_IMMUNITY		21	0.26724327	0.73782027	0.9238095	0.9934715	1.0	5625	tags=19%, list=10%, signal=21%
GO_BETA_CATENIN_TCF_COMPLEX_ASSEMBLY	GO_BETA_CATENIN_TCF_COMPLEX_ASSEMBLY		42	0.28828093	0.7377906	0.7950311	0.99290955	1.0	14435	tags=43%, list=27%, signal=58%
GO_CYCLIC_NUCLEOTIDE_BINDING	GO_CYCLIC_NUCLEOTIDE_BINDING		35	0.2504472	0.73717546	0.9431193	0.9931071	1.0	11504	tags=31%, list=21%, signal=40%
GO_NUCLEOSOMAL_DNA_BINDING	GO_NUCLEOSOMAL_DNA_BINDING		30	0.29043266	0.73597914	0.8023952	0.99405736	1.0	12548	tags=37%, list=23%, signal=48%
GO_DECIDUALIZATION	GO_DECIDUALIZATION		20	0.26594204	0.7357329	0.91035855	0.9937871	1.0	9874	tags=35%, list=18%, signal=43%
GO_ORGANIC_ACID_TRANSPORT	GO_ORGANIC_ACID_TRANSPORT		254	0.22040217	0.7355823	0.9770115	0.9933658	1.0	13260	tags=34%, list=24%, signal=45%
GO_PRIMARY_CILIUM	GO_PRIMARY_CILIUM		201	0.22386391	0.7355148	0.90138066	0.992854	1.0	13482	tags=31%, list=25%, signal=41%
GO_BILE_ACID_METABOLIC_PROCESS	GO_BILE_ACID_METABOLIC_PROCESS		35	0.2994605	0.7351143	0.8269231	0.99274033	1.0	9346	tags=26%, list=17%, signal=31%
GO_RESPONSE_TO_CAMP	GO_RESPONSE_TO_CAMP		103	0.22645973	0.73494893	0.9764065	0.9923612	1.0	14742	tags=37%, list=27%, signal=51%
GO_POSITIVE_REGULATION_OF_MESONEPHROS_DEVELOPMENT	GO_POSITIVE_REGULATION_OF_MESONEPHROS_DEVELOPMENT		22	0.29033434	0.7333211	0.8761726	0.99382085	1.0	15816	tags=55%, list=29%, signal=77%
GO_NEGATIVE_REGULATION_OF_PROTEIN_ACETYLATION	GO_NEGATIVE_REGULATION_OF_PROTEIN_ACETYLATION		21	0.29360694	0.73249906	0.82071716	0.9942488	1.0	13861	tags=38%, list=26%, signal=51%
GO_PHOSPHATIDYLGLYCEROL_METABOLIC_PROCESS	GO_PHOSPHATIDYLGLYCEROL_METABOLIC_PROCESS		31	0.28156087	0.73247683	0.8314176	0.99367553	1.0	11269	tags=29%, list=21%, signal=37%
GO_LEUKOCYTE_HOMEOSTASIS	GO_LEUKOCYTE_HOMEOSTASIS		60	0.23562847	0.7321606	0.97384304	0.99346155	1.0	12653	tags=35%, list=23%, signal=46%
GO_CYTOLYSIS	GO_CYTOLYSIS		23	0.29637358	0.7313396	0.87626773	0.9939065	1.0	7665	tags=26%, list=14%, signal=30%
GO_LONG_CHAIN_FATTY_ACID_TRANSPORT	GO_LONG_CHAIN_FATTY_ACID_TRANSPORT		42	0.25284967	0.7311326	0.91617936	0.9935672	1.0	11070	tags=29%, list=20%, signal=36%
GO_ELECTRON_CARRIER_ACTIVITY	GO_ELECTRON_CARRIER_ACTIVITY		111	0.23539852	0.7307751	0.85106385	0.9933992	1.0	15788	tags=39%, list=29%, signal=55%
GO_POSITIVE_REGULATION_OF_CYTOKINESIS	GO_POSITIVE_REGULATION_OF_CYTOKINESIS		35	0.25818118	0.7300542	0.91463417	0.9937238	1.0	10431	tags=29%, list=19%, signal=35%
GO_EXTRINSIC_APOPTOTIC_SIGNALING_PATHWAY	GO_EXTRINSIC_APOPTOTIC_SIGNALING_PATHWAY		99	0.22063507	0.72992665	0.9704142	0.9932747	1.0	13179	tags=32%, list=24%, signal=43%
GO_REGULATION_OF_NEUROTRANSMITTER_RECEPTOR_ACTIVITY	GO_REGULATION_OF_NEUROTRANSMITTER_RECEPTOR_ACTIVITY		30	0.272848	0.7298502	0.89772725	0.9927763	1.0	5819	tags=23%, list=11%, signal=26%
GO_MYELOID_CELL_DIFFERENTIATION	GO_MYELOID_CELL_DIFFERENTIATION		184	0.20037064	0.7281792	0.9981343	0.99420536	1.0	13612	tags=29%, list=25%, signal=39%
GO_PHOSPHATIDYLINOSITOL_ACYL_CHAIN_REMODELING	GO_PHOSPHATIDYLINOSITOL_ACYL_CHAIN_REMODELING		16	0.3442805	0.7271995	0.83531743	0.994782	1.0	8782	tags=31%, list=16%, signal=37%
GO_STEROID_BIOSYNTHETIC_PROCESS	GO_STEROID_BIOSYNTHETIC_PROCESS		111	0.25085124	0.7270978	0.86796117	0.9942997	1.0	8610	tags=22%, list=16%, signal=26%
GO_POLYAMINE_METABOLIC_PROCESS	GO_POLYAMINE_METABOLIC_PROCESS		15	0.2847738	0.72708726	0.87109375	0.99371624	1.0	11353	tags=27%, list=21%, signal=34%
GO_MYELOID_CELL_DEVELOPMENT	GO_MYELOID_CELL_DEVELOPMENT		42	0.22379807	0.72674316	0.968	0.9935599	1.0	13612	tags=36%, list=25%, signal=48%
GO_ORGANIC_HYDROXY_COMPOUND_CATABOLIC_PROCESS	GO_ORGANIC_HYDROXY_COMPOUND_CATABOLIC_PROCESS		72	0.24242568	0.7263604	0.8822394	0.99339837	1.0	9565	tags=26%, list=18%, signal=32%
GO_GAMMA_AMINOBUTYRIC_ACID_SIGNALING_PATHWAY	GO_GAMMA_AMINOBUTYRIC_ACID_SIGNALING_PATHWAY		23	0.28278264	0.7258182	0.8796844	0.99344033	1.0	7414	tags=22%, list=14%, signal=25%
GO_T_CELL_LINEAGE_COMMITMENT	GO_T_CELL_LINEAGE_COMMITMENT		15	0.2721521	0.7257218	0.9356137	0.9929686	1.0	16799	tags=47%, list=31%, signal=68%
GO_POSITIVE_REGULATION_OF_G1_S_TRANSITION_OF_MITOTIC_CELL_CYCLE	GO_POSITIVE_REGULATION_OF_G1_S_TRANSITION_OF_MITOTIC_CELL_CYCLE		24	0.28269488	0.7257068	0.812749	0.9923905	1.0	13255	tags=38%, list=24%, signal=50%
GO_REGULATION_OF_DENDRITIC_SPINE_MORPHOGENESIS	GO_REGULATION_OF_DENDRITIC_SPINE_MORPHOGENESIS		30	0.24384621	0.7245052	0.92761904	0.9931828	1.0	18939	tags=57%, list=35%, signal=87%
GO_DRUG_TRANSPORT	GO_DRUG_TRANSPORT		25	0.27815774	0.7236122	0.8674464	0.9936182	1.0	13421	tags=44%, list=25%, signal=58%
GO_DEACETYLASE_ACTIVITY	GO_DEACETYLASE_ACTIVITY		54	0.22620553	0.72349334	0.94153225	0.9931506	1.0	15653	tags=37%, list=29%, signal=52%
GO_FC_RECEPTOR_SIGNALING_PATHWAY	GO_FC_RECEPTOR_SIGNALING_PATHWAY		205	0.22235064	0.7227129	0.9412998	0.9934524	1.0	12013	tags=27%, list=22%, signal=35%
GO_GLANDULAR_EPITHELIAL_CELL_DEVELOPMENT	GO_GLANDULAR_EPITHELIAL_CELL_DEVELOPMENT		18	0.30249217	0.72238076	0.8252427	0.993217	1.0	11987	tags=28%, list=22%, signal=36%
GO_POSITIVE_REGULATION_OF_NEUROTRANSMITTER_TRANSPORT	GO_POSITIVE_REGULATION_OF_NEUROTRANSMITTER_TRANSPORT		15	0.29456624	0.7219168	0.92678225	0.99315673	1.0	13424	tags=47%, list=25%, signal=62%
GO_POSITIVE_REGULATION_OF_CELL_CYCLE_G1_S_PHASE_TRANSITION	GO_POSITIVE_REGULATION_OF_CELL_CYCLE_G1_S_PHASE_TRANSITION		28	0.277492	0.7214853	0.82834333	0.99305576	1.0	13255	tags=39%, list=24%, signal=52%
GO_PHOSPHATIDYLINOSITOL_3_4_5_TRISPHOSPHATE_BINDING	GO_PHOSPHATIDYLINOSITOL_3_4_5_TRISPHOSPHATE_BINDING		34	0.24849647	0.7209519	0.92578125	0.99304473	1.0	14200	tags=35%, list=26%, signal=48%
GO_REGULATION_OF_NUCLEOSIDE_METABOLIC_PROCESS	GO_REGULATION_OF_NUCLEOSIDE_METABOLIC_PROCESS		48	0.22299325	0.72034526	0.98865783	0.9931474	1.0	11814	tags=27%, list=22%, signal=35%
GO_IMMUNE_RESPONSE_REGULATING_CELL_SURFACE_RECEPTOR_SIGNALING_PATHWAY	GO_IMMUNE_RESPONSE_REGULATING_CELL_SURFACE_RECEPTOR_SIGNALING_PATHWAY		315	0.20502801	0.7200265	0.99596775	0.9929134	1.0	14304	tags=33%, list=26%, signal=44%
GO_REGULATION_OF_TYPE_2_IMMUNE_RESPONSE	GO_REGULATION_OF_TYPE_2_IMMUNE_RESPONSE		25	0.2869467	0.7196153	0.908	0.99282	1.0	7256	tags=28%, list=13%, signal=32%
GO_SERINE_FAMILY_AMINO_ACID_BIOSYNTHETIC_PROCESS	GO_SERINE_FAMILY_AMINO_ACID_BIOSYNTHETIC_PROCESS		16	0.31608889	0.7188805	0.80761904	0.99305284	1.0	18863	tags=56%, list=35%, signal=86%
GO_REGULATION_OF_MRNA_CATABOLIC_PROCESS	GO_REGULATION_OF_MRNA_CATABOLIC_PROCESS		25	0.2742916	0.71847177	0.8488372	0.9929102	1.0	10374	tags=32%, list=19%, signal=40%
GO_AROMATIC_AMINO_ACID_FAMILY_CATABOLIC_PROCESS	GO_AROMATIC_AMINO_ACID_FAMILY_CATABOLIC_PROCESS		20	0.29948124	0.7183902	0.83838385	0.9924152	1.0	15339	tags=45%, list=28%, signal=63%
GO_NON_MEMBRANE_SPANNING_PROTEIN_TYROSINE_KINASE_ACTIVITY	GO_NON_MEMBRANE_SPANNING_PROTEIN_TYROSINE_KINASE_ACTIVITY		46	0.24334866	0.7183385	0.95454544	0.9918811	1.0	16380	tags=50%, list=30%, signal=72%
GO_WATER_TRANSPORT	GO_WATER_TRANSPORT		20	0.31254637	0.7168967	0.9003831	0.99285144	1.0	12157	tags=50%, list=22%, signal=64%
GO_REGULATION_OF_UBIQUITIN_PROTEIN_LIGASE_ACTIVITY	GO_REGULATION_OF_UBIQUITIN_PROTEIN_LIGASE_ACTIVITY		17	0.3035332	0.71634364	0.7987928	0.9928486	1.0	15304	tags=53%, list=28%, signal=74%
GO_REGULATION_OF_PRI_MIRNA_TRANSCRIPTION_FROM_RNA_POLYMERASE_II_PROMOTER	GO_REGULATION_OF_PRI_MIRNA_TRANSCRIPTION_FROM_RNA_POLYMERASE_II_PROMOTER		17	0.26684925	0.71633077	0.93413174	0.99227446	1.0	13087	tags=35%, list=24%, signal=46%
GO_PROTEASOME_ACCESSORY_COMPLEX	GO_PROTEASOME_ACCESSORY_COMPLEX		24	0.31739485	0.7162475	0.76556015	0.991784	1.0	13603	tags=42%, list=25%, signal=56%
GO_FMN_BINDING	GO_FMN_BINDING		15	0.30562997	0.71594054	0.8684211	0.99152786	1.0	575	tags=13%, list=1%, signal=13%
GO_REGULATION_OF_MITOCHONDRIAL_OUTER_MEMBRANE_PERMEABILIZATION_INVOLVED_IN_APOPTOTIC_SIGNALING_PATHWAY	GO_REGULATION_OF_MITOCHONDRIAL_OUTER_MEMBRANE_PERMEABILIZATION_INVOLVED_IN_APOPTOTIC_SIGNALING_PATHWAY		42	0.23336391	0.71555734	0.9183673	0.991349	1.0	9869	tags=21%, list=18%, signal=26%
GO_REGULATION_OF_DENDRITIC_SPINE_DEVELOPMENT	GO_REGULATION_OF_DENDRITIC_SPINE_DEVELOPMENT		55	0.22372761	0.71316946	0.9653179	0.9932613	1.0	16341	tags=42%, list=30%, signal=60%
GO_REGULATION_OF_ALPHA_AMINO_3_HYDROXY_5_METHYL_4_ISOXAZOLE_PROPIONATE_SELECTIVE_GLUTAMATE_RECEPTOR_ACTIVITY	GO_REGULATION_OF_ALPHA_AMINO_3_HYDROXY_5_METHYL_4_ISOXAZOLE_PROPIONATE_SELECTIVE_GLUTAMATE_RECEPTOR_ACTIVITY		19	0.29319718	0.71268606	0.8947368	0.993173	1.0	16961	tags=63%, list=31%, signal=92%
GO_BRUSH_BORDER_MEMBRANE	GO_BRUSH_BORDER_MEMBRANE		55	0.24906181	0.7126365	0.946593	0.99263	1.0	9625	tags=31%, list=18%, signal=38%
GO_ISOPRENOID_BIOSYNTHETIC_PROCESS	GO_ISOPRENOID_BIOSYNTHETIC_PROCESS		25	0.28833944	0.7125017	0.84931505	0.99218154	1.0	11596	tags=36%, list=21%, signal=46%
GO_BRAIN_MORPHOGENESIS	GO_BRAIN_MORPHOGENESIS		34	0.24614295	0.7122668	0.9370229	0.9918425	1.0	7345	tags=24%, list=14%, signal=27%
GO_AP_TYPE_MEMBRANE_COAT_ADAPTOR_COMPLEX	GO_AP_TYPE_MEMBRANE_COAT_ADAPTOR_COMPLEX		36	0.24704146	0.71202165	0.9072581	0.99151206	1.0	13540	tags=33%, list=25%, signal=44%
GO_PEPTIDASE_ACTIVATOR_ACTIVITY_INVOLVED_IN_APOPTOTIC_PROCESS	GO_PEPTIDASE_ACTIVATOR_ACTIVITY_INVOLVED_IN_APOPTOTIC_PROCESS		21	0.24380234	0.7078102	0.94219655	0.9951361	1.0	13462	tags=33%, list=25%, signal=44%
GO_POSITIVE_REGULATION_OF_NEUTROPHIL_MIGRATION	GO_POSITIVE_REGULATION_OF_NEUTROPHIL_MIGRATION		27	0.26663482	0.7071383	0.92236596	0.9952089	1.0	14684	tags=37%, list=27%, signal=51%
GO_CELL_VOLUME_HOMEOSTASIS	GO_CELL_VOLUME_HOMEOSTASIS		28	0.25992402	0.70701694	0.94163424	0.99474704	1.0	12965	tags=43%, list=24%, signal=56%
GO_SECRETORY_GRANULE_MEMBRANE	GO_SECRETORY_GRANULE_MEMBRANE		76	0.2138571	0.7067421	0.98470366	0.99445295	1.0	11512	tags=25%, list=21%, signal=32%
GO_SMOOTHENED_SIGNALING_PATHWAY	GO_SMOOTHENED_SIGNALING_PATHWAY		70	0.25407425	0.7063958	0.868	0.9942169	1.0	9607	tags=23%, list=18%, signal=28%
GO_REGULATION_OF_MITOCHONDRIAL_DEPOLARIZATION	GO_REGULATION_OF_MITOCHONDRIAL_DEPOLARIZATION		18	0.26926142	0.70591176	0.95155036	0.9940992	1.0	18854	tags=56%, list=35%, signal=85%
GO_REGULATION_OF_TELOMERE_CAPPING	GO_REGULATION_OF_TELOMERE_CAPPING		21	0.2629073	0.70569956	0.91013384	0.99372035	1.0	18623	tags=62%, list=34%, signal=94%
GO_CELLULAR_RESPONSE_TO_INTERFERON_GAMMA	GO_CELLULAR_RESPONSE_TO_INTERFERON_GAMMA		120	0.24433793	0.70534325	0.92164946	0.9934588	1.0	13637	tags=35%, list=25%, signal=47%
GO_B_CELL_DIFFERENTIATION	GO_B_CELL_DIFFERENTIATION		89	0.2069993	0.70507723	1.0	0.99311996	1.0	16983	tags=37%, list=31%, signal=54%
GO_DEMETHYLATION	GO_DEMETHYLATION		53	0.23303305	0.7034889	0.9593496	0.9940731	1.0	10531	tags=25%, list=19%, signal=30%
GO_EMBRYONIC_CAMERA_TYPE_EYE_MORPHOGENESIS	GO_EMBRYONIC_CAMERA_TYPE_EYE_MORPHOGENESIS		24	0.2721229	0.70294684	0.9115385	0.99399	1.0	12553	tags=38%, list=23%, signal=49%
GO_TOR_SIGNALING	GO_TOR_SIGNALING		16	0.2981099	0.7027913	0.8404669	0.9935618	1.0	15816	tags=56%, list=29%, signal=79%
GO_BONE_CELL_DEVELOPMENT	GO_BONE_CELL_DEVELOPMENT		22	0.25162116	0.7011862	0.94466406	0.99446696	1.0	13612	tags=41%, list=25%, signal=55%
GO_RESPONSE_TO_NERVE_GROWTH_FACTOR	GO_RESPONSE_TO_NERVE_GROWTH_FACTOR		37	0.24402377	0.6991687	0.94163424	0.9957453	1.0	12352	tags=35%, list=23%, signal=45%
GO_OVULATION	GO_OVULATION		17	0.27794385	0.69910777	0.91395795	0.99522316	1.0	11581	tags=29%, list=21%, signal=37%
GO_GRANULOCYTE_ACTIVATION	GO_GRANULOCYTE_ACTIVATION		20	0.2942934	0.6984514	0.9120459	0.9952139	1.0	13890	tags=40%, list=26%, signal=54%
GO_STEROID_CATABOLIC_PROCESS	GO_STEROID_CATABOLIC_PROCESS		24	0.26843292	0.69721895	0.9227872	0.9957252	1.0	9565	tags=25%, list=18%, signal=30%
GO_ANTEROGRADE_AXONAL_TRANSPORT	GO_ANTEROGRADE_AXONAL_TRANSPORT		22	0.28079152	0.6957845	0.8370672	0.99639416	1.0	15558	tags=55%, list=29%, signal=76%
GO_BETA_TUBULIN_BINDING	GO_BETA_TUBULIN_BINDING		35	0.22964656	0.6951342	0.95	0.99638325	1.0	9337	tags=26%, list=17%, signal=31%
GO_NEGATIVE_REGULATION_OF_ORGAN_GROWTH	GO_NEGATIVE_REGULATION_OF_ORGAN_GROWTH		21	0.26787633	0.6935989	0.93083006	0.9970917	1.0	12223	tags=29%, list=23%, signal=37%
GO_HYPOTHALAMUS_DEVELOPMENT	GO_HYPOTHALAMUS_DEVELOPMENT		24	0.26896176	0.6932142	0.93018866	0.9968594	1.0	13414	tags=38%, list=25%, signal=50%
GO_POSITIVE_REGULATION_OF_NEURON_DEATH	GO_POSITIVE_REGULATION_OF_NEURON_DEATH		67	0.21265167	0.6924138	0.97900766	0.99693173	1.0	16547	tags=42%, list=30%, signal=60%
GO_CLATHRIN_VESICLE_COAT	GO_CLATHRIN_VESICLE_COAT		23	0.27159664	0.6923475	0.88271606	0.99641126	1.0	6819	tags=22%, list=13%, signal=25%
GO_NEGATIVE_REGULATION_OF_INTERLEUKIN_12_PRODUCTION	GO_NEGATIVE_REGULATION_OF_INTERLEUKIN_12_PRODUCTION		15	0.2680977	0.69154876	0.94746715	0.99650604	1.0	10885	tags=33%, list=20%, signal=42%
GO_HISTONE_H3_K4_METHYLATION	GO_HISTONE_H3_K4_METHYLATION		27	0.2816911	0.6914149	0.8360324	0.99603975	1.0	14075	tags=37%, list=26%, signal=50%
GO_REGULATION_OF_PROTEIN_TYROSINE_KINASE_ACTIVITY	GO_REGULATION_OF_PROTEIN_TYROSINE_KINASE_ACTIVITY		60	0.21477292	0.690111	0.98613864	0.99653286	1.0	14346	tags=38%, list=26%, signal=52%
GO_PHOSPHATE_TRANSMEMBRANE_TRANSPORTER_ACTIVITY	GO_PHOSPHATE_TRANSMEMBRANE_TRANSPORTER_ACTIVITY		30	0.25344473	0.6900556	0.8915187	0.9959936	1.0	14507	tags=37%, list=27%, signal=50%
GO_REGULATION_OF_WATER_LOSS_VIA_SKIN	GO_REGULATION_OF_WATER_LOSS_VIA_SKIN		19	0.28107807	0.6881814	0.91382766	0.99691886	1.0	12837	tags=42%, list=24%, signal=55%
GO_OLFACTORY_LOBE_DEVELOPMENT	GO_OLFACTORY_LOBE_DEVELOPMENT		36	0.2569148	0.6870194	0.9443378	0.9972635	1.0	14034	tags=39%, list=26%, signal=52%
GO_FATTY_ACID_BETA_OXIDATION	GO_FATTY_ACID_BETA_OXIDATION		51	0.23859145	0.6859202	0.90613025	0.99754167	1.0	1973	tags=10%, list=4%, signal=10%
GO_BICARBONATE_TRANSMEMBRANE_TRANSPORTER_ACTIVITY	GO_BICARBONATE_TRANSMEMBRANE_TRANSPORTER_ACTIVITY		19	0.26863116	0.68583465	0.9285714	0.99703187	1.0	14356	tags=37%, list=26%, signal=50%
GO_SIGNAL_TRANSDUCTION_INVOLVED_IN_REGULATION_OF_GENE_EXPRESSION	GO_SIGNAL_TRANSDUCTION_INVOLVED_IN_REGULATION_OF_GENE_EXPRESSION		18	0.2629398	0.6857585	0.93307084	0.9965137	1.0	1309	tags=11%, list=2%, signal=11%
GO_ALDITOL_PHOSPHATE_METABOLIC_PROCESS	GO_ALDITOL_PHOSPHATE_METABOLIC_PROCESS		35	0.26628712	0.6839082	0.9217221	0.99734676	1.0	10708	tags=26%, list=20%, signal=32%
GO_HISTONE_LYSINE_N_METHYLTRANSFERASE_ACTIVITY	GO_HISTONE_LYSINE_N_METHYLTRANSFERASE_ACTIVITY		40	0.25532117	0.6832669	0.87007874	0.9972272	1.0	7892	tags=28%, list=15%, signal=32%
GO_POSITIVE_REGULATION_OF_AUTOPHAGY	GO_POSITIVE_REGULATION_OF_AUTOPHAGY		75	0.21872205	0.6826587	0.9720559	0.9971175	1.0	15048	tags=37%, list=28%, signal=52%
GO_TRANSLATION_REGULATOR_ACTIVITY	GO_TRANSLATION_REGULATOR_ACTIVITY		35	0.23888908	0.6823657	0.9423459	0.9967604	1.0	11684	tags=26%, list=22%, signal=33%
GO_DISULFIDE_OXIDOREDUCTASE_ACTIVITY	GO_DISULFIDE_OXIDOREDUCTASE_ACTIVITY		31	0.22246264	0.6821834	0.9757085	0.99631596	1.0	15788	tags=42%, list=29%, signal=59%
GO_SYNAPTONEMAL_COMPLEX_ORGANIZATION	GO_SYNAPTONEMAL_COMPLEX_ORGANIZATION		21	0.28025872	0.68152493	0.92706335	0.99623585	1.0	8473	tags=24%, list=16%, signal=28%
GO_REGULATION_OF_DENDRITE_EXTENSION	GO_REGULATION_OF_DENDRITE_EXTENSION		18	0.26439667	0.6811793	0.9739479	0.9958993	1.0	11708	tags=33%, list=22%, signal=42%
GO_NEUTRAL_LIPID_METABOLIC_PROCESS	GO_NEUTRAL_LIPID_METABOLIC_PROCESS		85	0.22982286	0.6800315	0.967433	0.99616754	1.0	7828	tags=20%, list=14%, signal=23%
GO_REGULATION_OF_SUPEROXIDE_METABOLIC_PROCESS	GO_REGULATION_OF_SUPEROXIDE_METABOLIC_PROCESS		23	0.2457805	0.67961925	0.9511278	0.99589515	1.0	14465	tags=48%, list=27%, signal=65%
GO_POSITIVE_REGULATION_OF_NUCLEASE_ACTIVITY	GO_POSITIVE_REGULATION_OF_NUCLEASE_ACTIVITY		15	0.28222328	0.6781098	0.86503065	0.9963999	1.0	15219	tags=40%, list=28%, signal=56%
GO_REGULATION_OF_T_CELL_RECEPTOR_SIGNALING_PATHWAY	GO_REGULATION_OF_T_CELL_RECEPTOR_SIGNALING_PATHWAY		27	0.24574506	0.6776431	0.9751908	0.9961558	1.0	4449	tags=19%, list=8%, signal=20%
GO_REGULATION_OF_SULFUR_METABOLIC_PROCESS	GO_REGULATION_OF_SULFUR_METABOLIC_PROCESS		20	0.26881573	0.67634004	0.9229287	0.99651474	1.0	14435	tags=40%, list=27%, signal=54%
GO_GLUTATHIONE_METABOLIC_PROCESS	GO_GLUTATHIONE_METABOLIC_PROCESS		61	0.2256412	0.67460394	0.9544592	0.9970909	1.0	12171	tags=30%, list=22%, signal=38%
GO_FATTY_ACYL_COA_BINDING	GO_FATTY_ACYL_COA_BINDING		31	0.25307065	0.6738426	0.9046693	0.9970427	1.0	1072	tags=10%, list=2%, signal=10%
GO_S_ADENOSYLMETHIONINE_METABOLIC_PROCESS	GO_S_ADENOSYLMETHIONINE_METABOLIC_PROCESS		18	0.27869335	0.67336655	0.89285713	0.9967852	1.0	14826	tags=39%, list=27%, signal=53%
GO_CYTOPLASMIC_SEQUESTERING_OF_TRANSCRIPTION_FACTOR	GO_CYTOPLASMIC_SEQUESTERING_OF_TRANSCRIPTION_FACTOR		19	0.26038477	0.67311615	0.9278752	0.99637854	1.0	13821	tags=42%, list=25%, signal=56%
GO_INTRINSIC_COMPONENT_OF_THE_CYTOPLASMIC_SIDE_OF_THE_PLASMA_MEMBRANE	GO_INTRINSIC_COMPONENT_OF_THE_CYTOPLASMIC_SIDE_OF_THE_PLASMA_MEMBRANE		15	0.2780418	0.6723599	0.9112426	0.9962838	1.0	15575	tags=40%, list=29%, signal=56%
GO_FILAMENTOUS_ACTIN	GO_FILAMENTOUS_ACTIN		20	0.250179	0.67188036	0.94653463	0.9960375	1.0	4664	tags=15%, list=9%, signal=16%
GO_CELL_PROLIFERATION_IN_FOREBRAIN	GO_CELL_PROLIFERATION_IN_FOREBRAIN		27	0.26091918	0.67185676	0.94837475	0.99548405	1.0	7961	tags=26%, list=15%, signal=30%
GO_CHROMATIN_SILENCING	GO_CHROMATIN_SILENCING		93	0.22728013	0.67120534	0.9028926	0.9953381	1.0	12612	tags=27%, list=23%, signal=35%
GO_PROTEIN_SERINE_THREONINE_TYROSINE_KINASE_ACTIVITY	GO_PROTEIN_SERINE_THREONINE_TYROSINE_KINASE_ACTIVITY		39	0.21189892	0.6699256	0.98651254	0.99561006	1.0	11686	tags=26%, list=22%, signal=33%
GO_REGULATION_OF_DOUBLE_STRAND_BREAK_REPAIR_VIA_HOMOLOGOUS_RECOMBINATION	GO_REGULATION_OF_DOUBLE_STRAND_BREAK_REPAIR_VIA_HOMOLOGOUS_RECOMBINATION		16	0.29282257	0.6697698	0.8476954	0.9951524	1.0	17033	tags=44%, list=31%, signal=64%
GO_BENZENE_CONTAINING_COMPOUND_METABOLIC_PROCESS	GO_BENZENE_CONTAINING_COMPOUND_METABOLIC_PROCESS		24	0.25419137	0.6695097	0.93822396	0.99474424	1.0	3908	tags=17%, list=7%, signal=18%
GO_LYSOPHOSPHOLIPASE_ACTIVITY	GO_LYSOPHOSPHOLIPASE_ACTIVITY		20	0.26867473	0.6672336	0.92971885	0.9956378	1.0	10190	tags=30%, list=19%, signal=37%
GO_BONE_RESORPTION	GO_BONE_RESORPTION		21	0.24694061	0.66681284	0.95719844	0.9953164	1.0	16380	tags=48%, list=30%, signal=68%
GO_LYSOSOMAL_TRANSPORT	GO_LYSOSOMAL_TRANSPORT		68	0.1949101	0.6661207	0.99408287	0.99516714	1.0	8308	tags=16%, list=15%, signal=19%
GO_DEFENSE_RESPONSE_TO_GRAM_POSITIVE_BACTERIUM	GO_DEFENSE_RESPONSE_TO_GRAM_POSITIVE_BACTERIUM		71	0.20863064	0.66460156	0.9940594	0.9955396	1.0	17233	tags=42%, list=32%, signal=62%
GO_LYSOPHOSPHOLIPID_ACYLTRANSFERASE_ACTIVITY	GO_LYSOPHOSPHOLIPID_ACYLTRANSFERASE_ACTIVITY		19	0.24605623	0.664189	0.9411765	0.99522835	1.0	19508	tags=53%, list=36%, signal=82%
GO_POSITIVE_REGULATION_OF_AXON_EXTENSION	GO_POSITIVE_REGULATION_OF_AXON_EXTENSION		36	0.23382285	0.663684	0.9506903	0.9949542	1.0	13211	tags=33%, list=24%, signal=44%
GO_POSITIVE_REGULATION_OF_LIPID_CATABOLIC_PROCESS	GO_POSITIVE_REGULATION_OF_LIPID_CATABOLIC_PROCESS		25	0.24768011	0.6627442	0.94837475	0.99493825	1.0	8057	tags=24%, list=15%, signal=28%
GO_MHC_PROTEIN_COMPLEX	GO_MHC_PROTEIN_COMPLEX		25	0.337661	0.6588001	0.8526971	0.9966839	1.0	14261	tags=52%, list=26%, signal=71%
GO_O_ACYLTRANSFERASE_ACTIVITY	GO_O_ACYLTRANSFERASE_ACTIVITY		48	0.2163418	0.65778285	0.99805826	0.99673533	1.0	11231	tags=25%, list=21%, signal=31%
GO_REGULATION_OF_PROTEIN_INSERTION_INTO_MITOCHONDRIAL_MEMBRANE_INVOLVED_IN_APOPTOTIC_SIGNALING_PATHWAY	GO_REGULATION_OF_PROTEIN_INSERTION_INTO_MITOCHONDRIAL_MEMBRANE_INVOLVED_IN_APOPTOTIC_SIGNALING_PATHWAY		29	0.23141482	0.6568218	0.94824016	0.996697	1.0	5189	tags=14%, list=10%, signal=15%
GO_PHOSPHATIDYLSERINE_ACYL_CHAIN_REMODELING	GO_PHOSPHATIDYLSERINE_ACYL_CHAIN_REMODELING		17	0.32193187	0.6561247	0.9029126	0.99649185	1.0	10220	tags=29%, list=19%, signal=36%
GO_FOREBRAIN_GENERATION_OF_NEURONS	GO_FOREBRAIN_GENERATION_OF_NEURONS		66	0.22552484	0.65566087	0.99220276	0.9961836	1.0	11691	tags=32%, list=22%, signal=41%
GO_AROMATIC_AMINO_ACID_FAMILY_METABOLIC_PROCESS	GO_AROMATIC_AMINO_ACID_FAMILY_METABOLIC_PROCESS		28	0.25137088	0.6555534	0.95348835	0.99567187	1.0	10633	tags=32%, list=20%, signal=40%
GO_PROTEASOME_BINDING	GO_PROTEASOME_BINDING		16	0.26655674	0.6545122	0.9158317	0.995651	1.0	6056	tags=19%, list=11%, signal=21%
GO_AXON_CYTOPLASM	GO_AXON_CYTOPLASM		29	0.23943153	0.65314823	0.93660533	0.99584085	1.0	14266	tags=41%, list=26%, signal=56%
GO_INTESTINAL_ABSORPTION	GO_INTESTINAL_ABSORPTION		26	0.29403722	0.65245813	0.872093	0.99564546	1.0	12820	tags=38%, list=24%, signal=50%
GO_REGULATION_OF_IMMUNOGLOBULIN_SECRETION	GO_REGULATION_OF_IMMUNOGLOBULIN_SECRETION		17	0.24614155	0.6503406	0.97884613	0.9961762	1.0	3228	tags=12%, list=6%, signal=13%
GO_REGULATION_OF_MESONEPHROS_DEVELOPMENT	GO_REGULATION_OF_MESONEPHROS_DEVELOPMENT		26	0.24736369	0.6500727	0.9737336	0.99574757	1.0	13465	tags=42%, list=25%, signal=56%
GO_LEUKOCYTE_APOPTOTIC_PROCESS	GO_LEUKOCYTE_APOPTOTIC_PROCESS		22	0.24698497	0.64905053	0.9748954	0.99571306	1.0	14260	tags=41%, list=26%, signal=55%
GO_RESPONSE_TO_TYPE_I_INTERFERON	GO_RESPONSE_TO_TYPE_I_INTERFERON		68	0.30269036	0.6490059	0.83095723	0.99517035	1.0	14318	tags=34%, list=26%, signal=46%
GO_REGULATION_OF_TRIGLYCERIDE_BIOSYNTHETIC_PROCESS	GO_REGULATION_OF_TRIGLYCERIDE_BIOSYNTHETIC_PROCESS		17	0.2843626	0.64861435	0.8984674	0.9948005	1.0	2306	tags=12%, list=4%, signal=12%
GO_REGULATION_OF_MITOCHONDRIAL_MEMBRANE_POTENTIAL	GO_REGULATION_OF_MITOCHONDRIAL_MEMBRANE_POTENTIAL		54	0.197943	0.64766425	0.996139	0.9947275	1.0	5745	tags=15%, list=11%, signal=17%
GO_ENDOSOME_TO_LYSOSOME_TRANSPORT	GO_ENDOSOME_TO_LYSOSOME_TRANSPORT		41	0.2128963	0.6436274	0.9787645	0.99602544	1.0	17779	tags=41%, list=33%, signal=62%
GO_REGULATION_OF_GLUCONEOGENESIS	GO_REGULATION_OF_GLUCONEOGENESIS		35	0.22202829	0.6431309	1.0	0.99568665	1.0	6808	tags=17%, list=13%, signal=20%
GO_TASTE_RECEPTOR_ACTIVITY	GO_TASTE_RECEPTOR_ACTIVITY		29	0.23605482	0.64098966	0.9533074	0.9960759	1.0	10987	tags=24%, list=20%, signal=30%
GO_PHAGOCYTIC_CUP	GO_PHAGOCYTIC_CUP		18	0.24339208	0.6402533	0.9737336	0.99584615	1.0	18938	tags=50%, list=35%, signal=77%
GO_IONOTROPIC_GLUTAMATE_RECEPTOR_BINDING	GO_IONOTROPIC_GLUTAMATE_RECEPTOR_BINDING		23	0.2298835	0.64019305	0.9962049	0.9953138	1.0	7969	tags=22%, list=15%, signal=25%
GO_NEGATIVE_REGULATION_OF_GENE_SILENCING	GO_NEGATIVE_REGULATION_OF_GENE_SILENCING		18	0.22649497	0.63912004	0.9843444	0.995217	1.0	11389	tags=22%, list=21%, signal=28%
GO_INTRINSIC_APOPTOTIC_SIGNALING_PATHWAY_IN_RESPONSE_TO_ENDOPLASMIC_RETICULUM_STRESS	GO_INTRINSIC_APOPTOTIC_SIGNALING_PATHWAY_IN_RESPONSE_TO_ENDOPLASMIC_RETICULUM_STRESS		32	0.2253102	0.63204974	0.97465885	0.99761623	1.0	14055	tags=34%, list=26%, signal=46%
GO_GLUCOSYLTRANSFERASE_ACTIVITY	GO_GLUCOSYLTRANSFERASE_ACTIVITY		16	0.2638622	0.6302348	0.93992245	0.9977621	1.0	6774	tags=25%, list=12%, signal=29%
GO_MRNA_3_UTR_BINDING	GO_MRNA_3_UTR_BINDING		47	0.21904136	0.6285847	0.9728682	0.9978516	1.0	12175	tags=30%, list=22%, signal=38%
GO_MULTI_ORGANISM_MEMBRANE_ORGANIZATION	GO_MULTI_ORGANISM_MEMBRANE_ORGANIZATION		30	0.22291343	0.627605	0.9707602	0.9976743	1.0	9845	tags=23%, list=18%, signal=28%
GO_OLFACTORY_BULB_INTERNEURON_DIFFERENTIATION	GO_OLFACTORY_BULB_INTERNEURON_DIFFERENTIATION		15	0.28743133	0.62713796	0.95427436	0.99729896	1.0	13196	tags=40%, list=24%, signal=53%
GO_LIPID_STORAGE	GO_LIPID_STORAGE		27	0.23173507	0.6248776	0.99220276	0.99757195	1.0	11962	tags=30%, list=22%, signal=38%
GO_PRE_AUTOPHAGOSOMAL_STRUCTURE	GO_PRE_AUTOPHAGOSOMAL_STRUCTURE		29	0.22256438	0.6211875	0.97475725	0.99828786	1.0	5578	tags=14%, list=10%, signal=15%
GO_MEMBRANE_RAFT_ORGANIZATION	GO_MEMBRANE_RAFT_ORGANIZATION		17	0.26202524	0.61964	0.9133065	0.99824077	1.0	15053	tags=47%, list=28%, signal=65%
GO_MALE_GENITALIA_DEVELOPMENT	GO_MALE_GENITALIA_DEVELOPMENT		21	0.24358068	0.6195083	0.9835466	0.99771917	1.0	14290	tags=43%, list=26%, signal=58%
GO_SERINE_FAMILY_AMINO_ACID_METABOLIC_PROCESS	GO_SERINE_FAMILY_AMINO_ACID_METABOLIC_PROCESS		42	0.23266535	0.6122034	0.94368935	0.9995125	1.0	16467	tags=38%, list=30%, signal=55%
GO_NEGATIVE_REGULATION_OF_RESPONSE_TO_ENDOPLASMIC_RETICULUM_STRESS	GO_NEGATIVE_REGULATION_OF_RESPONSE_TO_ENDOPLASMIC_RETICULUM_STRESS		37	0.22955517	0.61026895	0.97821784	0.99952507	1.0	14250	tags=41%, list=26%, signal=55%
GO_PROTEIN_TARGETING_TO_PLASMA_MEMBRANE	GO_PROTEIN_TARGETING_TO_PLASMA_MEMBRANE		23	0.22929099	0.6098285	0.97740114	0.9991052	1.0	17783	tags=52%, list=33%, signal=78%
GO_THREONINE_TYPE_PEPTIDASE_ACTIVITY	GO_THREONINE_TYPE_PEPTIDASE_ACTIVITY		21	0.25512165	0.6077686	0.9364754	0.9991253	1.0	15666	tags=48%, list=29%, signal=67%
GO_PROTEASOME_COMPLEX	GO_PROTEASOME_COMPLEX		75	0.21622244	0.6058365	0.95537525	0.9991086	1.0	15929	tags=40%, list=29%, signal=57%
GO_ARGININE_METABOLIC_PROCESS	GO_ARGININE_METABOLIC_PROCESS		17	0.2573626	0.6022103	0.9684015	0.9995061	1.0	13344	tags=29%, list=25%, signal=39%
GO_MUSCLE_CELL_FATE_COMMITMENT	GO_MUSCLE_CELL_FATE_COMMITMENT		15	0.25794926	0.601722	0.9906367	0.99906904	1.0	15378	tags=47%, list=28%, signal=65%
GO_REGULATION_OF_PROTEIN_EXPORT_FROM_NUCLEUS	GO_REGULATION_OF_PROTEIN_EXPORT_FROM_NUCLEUS		33	0.20442127	0.5962931	0.9939516	0.9998807	1.0	14435	tags=33%, list=27%, signal=45%
GO_ALDO_KETO_REDUCTASE_NADP_ACTIVITY	GO_ALDO_KETO_REDUCTASE_NADP_ACTIVITY		26	0.26282933	0.5960116	0.9041916	0.99939364	1.0	12820	tags=31%, list=24%, signal=40%
GO_LONG_TERM_SYNAPTIC_DEPRESSION	GO_LONG_TERM_SYNAPTIC_DEPRESSION		15	0.25272045	0.59402925	0.9858012	0.9992963	1.0	13591	tags=33%, list=25%, signal=44%
GO_REGULATION_OF_HYDROGEN_PEROXIDE_METABOLIC_PROCESS	GO_REGULATION_OF_HYDROGEN_PEROXIDE_METABOLIC_PROCESS		15	0.24680014	0.59297734	0.9841584	0.99898756	1.0	14409	tags=47%, list=27%, signal=64%
GO_RECEPTOR_CATABOLIC_PROCESS	GO_RECEPTOR_CATABOLIC_PROCESS		17	0.21763636	0.58940995	0.98406374	0.99919266	1.0	18883	tags=59%, list=35%, signal=90%
GO_MICROTUBULE_PLUS_END	GO_MICROTUBULE_PLUS_END		16	0.24872212	0.5837582	0.95670104	0.999809	1.0	16960	tags=56%, list=31%, signal=82%
GO_REGULATION_OF_INTERLEUKIN_1_SECRETION	GO_REGULATION_OF_INTERLEUKIN_1_SECRETION		32	0.22323677	0.58214635	1.0	0.9995476	1.0	13184	tags=28%, list=24%, signal=37%
GO_RESPONSE_TO_INTERFERON_BETA	GO_RESPONSE_TO_INTERFERON_BETA		22	0.2467425	0.5811122	0.97379035	0.9991866	1.0	15877	tags=36%, list=29%, signal=51%
GO_POSITIVE_REGULATION_OF_INTERLEUKIN_1_BETA_PRODUCTION	GO_POSITIVE_REGULATION_OF_INTERLEUKIN_1_BETA_PRODUCTION		30	0.22319095	0.57980216	0.996008	0.9988828	1.0	15834	tags=40%, list=29%, signal=56%
GO_POSITIVE_REGULATION_OF_INTERLEUKIN_1_SECRETION	GO_POSITIVE_REGULATION_OF_INTERLEUKIN_1_SECRETION		24	0.22759578	0.57898504	0.9959267	0.99848616	1.0	15834	tags=38%, list=29%, signal=53%
GO_HIPPO_SIGNALING	GO_HIPPO_SIGNALING		27	0.23055214	0.5770551	0.95951414	0.99827737	1.0	18096	tags=52%, list=33%, signal=78%
GO_ALPHA_AMINO_ACID_CATABOLIC_PROCESS	GO_ALPHA_AMINO_ACID_CATABOLIC_PROCESS		92	0.21132374	0.57641053	0.9903475	0.9978324	1.0	14790	tags=34%, list=27%, signal=46%
GO_CELLULAR_AMINO_ACID_CATABOLIC_PROCESS	GO_CELLULAR_AMINO_ACID_CATABOLIC_PROCESS		109	0.20051026	0.5630989	1.0	0.9994121	1.0	14790	tags=33%, list=27%, signal=45%
GO_POSITIVE_REGULATION_OF_DENDRITIC_SPINE_DEVELOPMENT	GO_POSITIVE_REGULATION_OF_DENDRITIC_SPINE_DEVELOPMENT		35	0.19091406	0.56000096	1.0	0.999288	1.0	18425	tags=51%, list=34%, signal=78%
GO_COENZYME_A_METABOLIC_PROCESS	GO_COENZYME_A_METABOLIC_PROCESS		17	0.23157632	0.5596139	0.984	0.9987906	1.0	19134	tags=59%, list=35%, signal=91%
GO_HMG_BOX_DOMAIN_BINDING	GO_HMG_BOX_DOMAIN_BINDING		18	0.2403163	0.5567187	0.99246705	0.99863434	1.0	9607	tags=28%, list=18%, signal=34%
GO_STEROID_DEHYDROGENASE_ACTIVITY	GO_STEROID_DEHYDROGENASE_ACTIVITY		27	0.22641599	0.556509	0.980916	0.9981123	1.0	18028	tags=41%, list=33%, signal=61%
GO_FATTY_ACID_CATABOLIC_PROCESS	GO_FATTY_ACID_CATABOLIC_PROCESS		73	0.19376077	0.55325025	0.9980769	0.9979577	1.0	16568	tags=34%, list=31%, signal=49%
GO_MONOCARBOXYLIC_ACID_CATABOLIC_PROCESS	GO_MONOCARBOXYLIC_ACID_CATABOLIC_PROCESS		95	0.19443506	0.53603876	0.99805826	0.999147	1.0	16568	tags=36%, list=31%, signal=51%
GO_OXIDOREDUCTASE_ACTIVITY_ACTING_ON_THE_CH_CH_GROUP_OF_DONORS_NAD_OR_NADP_AS_ACCEPTOR	GO_OXIDOREDUCTASE_ACTIVITY_ACTING_ON_THE_CH_CH_GROUP_OF_DONORS_NAD_OR_NADP_AS_ACCEPTOR		24	0.21183038	0.52829736	0.9940239	0.99918044	1.0	16489	tags=38%, list=30%, signal=54%
GO_VACUOLE_FUSION	GO_VACUOLE_FUSION		23	0.19764039	0.51946414	0.99615383	0.9991982	1.0	19817	tags=61%, list=37%, signal=96%
GO_STEROL_BIOSYNTHETIC_PROCESS	GO_STEROL_BIOSYNTHETIC_PROCESS		42	0.2068388	0.5158327	0.9859438	0.9988603	1.0	8610	tags=19%, list=16%, signal=23%
GO_POSITIVE_REGULATION_OF_DNA_RECOMBINATION	GO_POSITIVE_REGULATION_OF_DNA_RECOMBINATION		18	0.1952216	0.5130791	0.99791664	0.9984526	1.0	11216	tags=22%, list=21%, signal=28%
GO_GLUTAMINE_FAMILY_AMINO_ACID_CATABOLIC_PROCESS	GO_GLUTAMINE_FAMILY_AMINO_ACID_CATABOLIC_PROCESS		24	0.20249535	0.48881373	1.0	0.998892	1.0	16345	tags=42%, list=30%, signal=60%
