# Supplementary material for: CELSR3 mRNA expression is increased in hepatocellular carcinoma and indicates poor prognosis
Source: PeerJ journal article supplement (doi:10.7717/peerj.7816), 2019-10-07
Supplement: The_complete_GSEA_results_of_GEO.zip [file The_complete_GSEA_results_of_GEO.zip]

NAME	GS<br> follow link to MSigDB	GS DETAILS	SIZE	ES	NES	NOM p-val	FDR q-val	FWER p-val	RANK AT MAX	LEADING EDGE
GO_DAMAGED_DNA_BINDING	GO_DAMAGED_DNA_BINDING	Details ...	57	0.68281466	1.9391915	0.0	0.36500335	0.233	2702	tags=60%, list=22%, signal=76%
GO_DNA_POLYMERASE_ACTIVITY	GO_DNA_POLYMERASE_ACTIVITY	Details ...	27	0.6730651	1.8945711	0.0	0.35949188	0.407	707	tags=33%, list=6%, signal=35%
GO_BASE_EXCISION_REPAIR	GO_BASE_EXCISION_REPAIR	Details ...	36	0.6794243	1.8856798	0.0	0.2759798	0.436	2053	tags=53%, list=16%, signal=63%
GO_RECOMBINATIONAL_REPAIR	GO_RECOMBINATIONAL_REPAIR	Details ...	55	0.6944341	1.8797421	0.0019379845	0.22533432	0.458	1975	tags=51%, list=16%, signal=60%
GO_HISTONE_DEUBIQUITINATION	GO_HISTONE_DEUBIQUITINATION	Details ...	17	0.6832219	1.8677733	0.0	0.21479568	0.514	3355	tags=76%, list=27%, signal=104%
GO_GAMMA_TUBULIN_COMPLEX	GO_GAMMA_TUBULIN_COMPLEX	Details ...	15	0.7146565	1.8666438	0.0019193857	0.18233202	0.517	1186	tags=47%, list=9%, signal=51%
GO_DNA_RECOMBINATION	GO_DNA_RECOMBINATION	Details ...	160	0.6336077	1.860618	0.0	0.16822402	0.531	2408	tags=49%, list=19%, signal=60%
GO_POSITIVE_REGULATION_OF_CYTOKINESIS	GO_POSITIVE_REGULATION_OF_CYTOKINESIS	Details ...	27	0.8244679	1.8582654	0.0	0.15222391	0.545	750	tags=30%, list=6%, signal=31%
GO_RRNA_TRANSCRIPTION	GO_RRNA_TRANSCRIPTION	Details ...	15	0.70677227	1.8548217	0.001908397	0.14140855	0.562	2801	tags=73%, list=22%, signal=94%
GO_DNA_REPAIR	GO_DNA_REPAIR	Details ...	363	0.5540157	1.8495083	0.003944773	0.13525397	0.586	3228	tags=48%, list=26%, signal=63%
GO_SITE_OF_DOUBLE_STRAND_BREAK	GO_SITE_OF_DOUBLE_STRAND_BREAK	Details ...	21	0.6790156	1.8484138	0.0	0.12520164	0.59	2100	tags=57%, list=17%, signal=69%
GO_DOUBLE_STRAND_BREAK_REPAIR	GO_DOUBLE_STRAND_BREAK_REPAIR	Details ...	120	0.6121798	1.8339853	0.007874016	0.14165375	0.652	2810	tags=52%, list=22%, signal=66%
GO_MICROTUBULE_NUCLEATION	GO_MICROTUBULE_NUCLEATION	Details ...	15	0.7057835	1.8279718	0.006012024	0.14101036	0.679	2166	tags=47%, list=17%, signal=56%
GO_NUCLEOTIDE_EXCISION_REPAIR_PREINCISION_COMPLEX_STABILIZATION	GO_NUCLEOTIDE_EXCISION_REPAIR_PREINCISION_COMPLEX_STABILIZATION	Details ...	20	0.66916466	1.8266798	0.0078125	0.13372594	0.685	2793	tags=60%, list=22%, signal=77%
GO_STRUCTURE_SPECIFIC_DNA_BINDING	GO_STRUCTURE_SPECIFIC_DNA_BINDING	Details ...	103	0.5165843	1.8219613	0.007797271	0.1325411	0.708	3627	tags=51%, list=29%, signal=72%
GO_REGULATION_OF_CYTOKINESIS	GO_REGULATION_OF_CYTOKINESIS	Details ...	48	0.72430986	1.8188177	0.0	0.12866147	0.715	750	tags=23%, list=6%, signal=24%
GO_MICROTUBULE_MOTOR_ACTIVITY	GO_MICROTUBULE_MOTOR_ACTIVITY	Details ...	53	0.72302973	1.8151424	0.0	0.12735163	0.726	796	tags=26%, list=6%, signal=28%
GO_TELOMERE_ORGANIZATION	GO_TELOMERE_ORGANIZATION	Details ...	82	0.6169515	1.8148271	0.001992032	0.12062678	0.727	2833	tags=51%, list=23%, signal=66%
GO_REGULATION_OF_DNA_REPAIR	GO_REGULATION_OF_DNA_REPAIR	Details ...	58	0.58078027	1.8075275	0.0077669905	0.12512124	0.748	3184	tags=59%, list=25%, signal=78%
GO_DNA_LIGATION	GO_DNA_LIGATION	Details ...	15	0.77076155	1.8058809	0.0	0.121677205	0.751	1838	tags=60%, list=15%, signal=70%
GO_MISMATCH_REPAIR	GO_MISMATCH_REPAIR	Details ...	26	0.69866997	1.804904	0.0019646366	0.11698905	0.756	1663	tags=54%, list=13%, signal=62%
GO_REGULATION_OF_MRNA_SPLICING_VIA_SPLICEOSOME	GO_REGULATION_OF_MRNA_SPLICING_VIA_SPLICEOSOME	Details ...	42	0.52930284	1.8047936	0.015625	0.11188957	0.757	4495	tags=71%, list=36%, signal=111%
GO_NUCLEOID	GO_NUCLEOID	Details ...	38	0.62362707	1.7986075	0.015904572	0.11623883	0.776	2197	tags=39%, list=18%, signal=48%
GO_DNA_SYNTHESIS_INVOLVED_IN_DNA_REPAIR	GO_DNA_SYNTHESIS_INVOLVED_IN_DNA_REPAIR	Details ...	64	0.7052611	1.7933179	0.0038461538	0.118806526	0.796	1009	tags=41%, list=8%, signal=44%
GO_MEMBRANE_DISASSEMBLY	GO_MEMBRANE_DISASSEMBLY	Details ...	43	0.67713964	1.7924188	0.0039138943	0.115400925	0.797	2487	tags=58%, list=20%, signal=72%
GO_PROTEIN_ACETYLATION	GO_PROTEIN_ACETYLATION	Details ...	95	0.4801851	1.7914873	0.00203666	0.112313524	0.801	4051	tags=55%, list=32%, signal=80%
GO_CHROMOSOME_TELOMERIC_REGION	GO_CHROMOSOME_TELOMERIC_REGION	Details ...	125	0.6002679	1.7902313	0.006048387	0.10971124	0.803	2864	tags=51%, list=23%, signal=66%
GO_MEIOSIS_I	GO_MEIOSIS_I	Details ...	60	0.6706269	1.7888517	0.001984127	0.1076521	0.808	1265	tags=35%, list=10%, signal=39%
GO_DNA_BIOSYNTHETIC_PROCESS	GO_DNA_BIOSYNTHETIC_PROCESS	Details ...	98	0.64282733	1.7881069	0.007920792	0.105059296	0.812	1009	tags=34%, list=8%, signal=36%
GO_PROTEIN_ACYLATION	GO_PROTEIN_ACYLATION	Details ...	112	0.45672485	1.7851502	0.002057613	0.10629587	0.823	4051	tags=52%, list=32%, signal=76%
GO_DNA_DIRECTED_DNA_POLYMERASE_ACTIVITY	GO_DNA_DIRECTED_DNA_POLYMERASE_ACTIVITY	Details ...	21	0.68848765	1.7843019	0.001908397	0.10385708	0.827	707	tags=38%, list=6%, signal=40%
GO_CHROMOSOMAL_REGION	GO_CHROMOSOMAL_REGION	Details ...	254	0.64852947	1.7840205	0.006024096	0.101143084	0.83	2471	tags=49%, list=20%, signal=60%
GO_NUCLEOTIDE_EXCISION_REPAIR_DNA_GAP_FILLING	GO_NUCLEOTIDE_EXCISION_REPAIR_DNA_GAP_FILLING	Details ...	23	0.72333395	1.7814739	0.0	0.10152263	0.841	1663	tags=52%, list=13%, signal=60%
GO_NUCLEAR_CHROMOSOME_TELOMERIC_REGION	GO_NUCLEAR_CHROMOSOME_TELOMERIC_REGION	Details ...	106	0.61051184	1.7755755	0.007984032	0.10664586	0.849	2931	tags=54%, list=23%, signal=70%
GO_MEIOTIC_CHROMOSOME_SEGREGATION	GO_MEIOTIC_CHROMOSOME_SEGREGATION	Details ...	39	0.692282	1.7741077	0.005952381	0.10548518	0.855	905	tags=33%, list=7%, signal=36%
GO_NCRNA_METABOLIC_PROCESS	GO_NCRNA_METABOLIC_PROCESS	Details ...	380	0.4925873	1.7731371	0.033398822	0.103521906	0.857	3917	tags=55%, list=31%, signal=78%
GO_POSITIVE_REGULATION_OF_DNA_REPAIR	GO_POSITIVE_REGULATION_OF_DNA_REPAIR	Details ...	31	0.5827744	1.7723327	0.015748031	0.10161224	0.857	2370	tags=45%, list=19%, signal=56%
GO_NCRNA_PROCESSING	GO_NCRNA_PROCESSING	Details ...	276	0.5011425	1.7708412	0.0390625	0.1008672	0.857	3917	tags=56%, list=31%, signal=80%
GO_TELOMERE_MAINTENANCE_VIA_RECOMBINATION	GO_TELOMERE_MAINTENANCE_VIA_RECOMBINATION	Details ...	31	0.81299496	1.7698039	0.0	0.09940981	0.86	1005	tags=58%, list=8%, signal=63%
GO_CENTRIOLE	GO_CENTRIOLE	Details ...	71	0.58832604	1.7691191	0.0039525693	0.09777103	0.862	1848	tags=35%, list=15%, signal=41%
GO_MICROTUBULE_ORGANIZING_CENTER_PART	GO_MICROTUBULE_ORGANIZING_CENTER_PART	Details ...	102	0.5446837	1.7684025	0.004008016	0.09632006	0.865	2296	tags=37%, list=18%, signal=45%
GO_HELICASE_ACTIVITY	GO_HELICASE_ACTIVITY	Details ...	119	0.56079996	1.7672963	0.01171875	0.09518779	0.872	2368	tags=45%, list=19%, signal=55%
GO_PURINE_NTP_DEPENDENT_HELICASE_ACTIVITY	GO_PURINE_NTP_DEPENDENT_HELICASE_ACTIVITY	Details ...	75	0.5327671	1.7671006	0.02131783	0.09319887	0.872	2999	tags=49%, list=24%, signal=64%
GO_MITOTIC_RECOMBINATION	GO_MITOTIC_RECOMBINATION	Details ...	39	0.7862422	1.7667317	0.0	0.091518685	0.873	1005	tags=51%, list=8%, signal=56%
GO_NUCLEAR_ENVELOPE_ORGANIZATION	GO_NUCLEAR_ENVELOPE_ORGANIZATION	Details ...	68	0.5691702	1.7636038	0.015414258	0.09301706	0.882	2523	tags=44%, list=20%, signal=55%
GO_RIBOSOME_BIOGENESIS	GO_RIBOSOME_BIOGENESIS	Details ...	228	0.5197422	1.759792	0.042801555	0.09547939	0.886	3917	tags=58%, list=31%, signal=83%
GO_CONDENSED_NUCLEAR_CHROMOSOME	GO_CONDENSED_NUCLEAR_CHROMOSOME	Details ...	67	0.67146033	1.7594576	0.007858546	0.09369278	0.886	1975	tags=48%, list=16%, signal=56%
GO_INTERSTRAND_CROSS_LINK_REPAIR	GO_INTERSTRAND_CROSS_LINK_REPAIR	Details ...	30	0.6383956	1.7575442	0.013861386	0.09400857	0.89	3721	tags=70%, list=30%, signal=99%
GO_PEPTIDYL_THREONINE_MODIFICATION	GO_PEPTIDYL_THREONINE_MODIFICATION	Details ...	42	0.54581237	1.7574128	0.006198347	0.09224345	0.89	1864	tags=36%, list=15%, signal=42%
GO_DNA_GEOMETRIC_CHANGE	GO_DNA_GEOMETRIC_CHANGE	Details ...	73	0.6367344	1.7561553	0.0019607844	0.0917121	0.89	2845	tags=56%, list=23%, signal=72%
GO_DNA_REPLICATION_INDEPENDENT_NUCLEOSOME_ORGANIZATION	GO_DNA_REPLICATION_INDEPENDENT_NUCLEOSOME_ORGANIZATION	Details ...	37	0.7183896	1.7544309	0.007968128	0.091777235	0.892	1268	tags=43%, list=10%, signal=48%
GO_PROTEIN_LOCALIZATION_TO_CYTOSKELETON	GO_PROTEIN_LOCALIZATION_TO_CYTOSKELETON	Details ...	22	0.694506	1.7535994	0.0	0.090710774	0.892	976	tags=32%, list=8%, signal=34%
GO_CHROMOSOME_CENTROMERIC_REGION	GO_CHROMOSOME_CENTROMERIC_REGION	Details ...	134	0.71405834	1.7533624	0.0020242915	0.08917911	0.893	1423	tags=43%, list=11%, signal=48%
GO_PEPTIDYL_LYSINE_MODIFICATION	GO_PEPTIDYL_LYSINE_MODIFICATION	Details ...	250	0.49034595	1.7527063	0.005964215	0.08819453	0.893	3742	tags=53%, list=30%, signal=74%
GO_ORGANELLE_FISSION	GO_ORGANELLE_FISSION	Details ...	363	0.6449266	1.7500864	0.007968128	0.08897377	0.895	1523	tags=35%, list=12%, signal=39%
GO_DNA_REPAIR_COMPLEX	GO_DNA_REPAIR_COMPLEX	Details ...	31	0.61357164	1.7493694	0.0060362173	0.0880239	0.897	1319	tags=29%, list=11%, signal=32%
GO_RRNA_METABOLIC_PROCESS	GO_RRNA_METABOLIC_PROCESS	Details ...	189	0.5036425	1.7472736	0.055876687	0.08870761	0.901	3917	tags=57%, list=31%, signal=82%
GO_MEIOTIC_CELL_CYCLE_PROCESS	GO_MEIOTIC_CELL_CYCLE_PROCESS	Details ...	104	0.6210779	1.7467054	0.0137795275	0.08779769	0.902	1265	tags=31%, list=10%, signal=34%
GO_CELL_CYCLE_G2_M_PHASE_TRANSITION	GO_CELL_CYCLE_G2_M_PHASE_TRANSITION	Details ...	123	0.5873907	1.7459671	0.0019762847	0.08696084	0.903	1090	tags=27%, list=9%, signal=29%
GO_RIBONUCLEOPROTEIN_COMPLEX_BIOGENESIS	GO_RIBONUCLEOPROTEIN_COMPLEX_BIOGENESIS	Details ...	332	0.5066815	1.7456739	0.048828125	0.08575261	0.903	3917	tags=55%, list=31%, signal=78%
GO_NEGATIVE_REGULATION_OF_MRNA_METABOLIC_PROCESS	GO_NEGATIVE_REGULATION_OF_MRNA_METABOLIC_PROCESS	Details ...	29	0.53234327	1.7452296	0.017475728	0.08491239	0.904	4710	tags=62%, list=38%, signal=99%
GO_NUCLEOTIDE_EXCISION_REPAIR_DNA_DUPLEX_UNWINDING	GO_NUCLEOTIDE_EXCISION_REPAIR_DNA_DUPLEX_UNWINDING	Details ...	21	0.60500443	1.7426071	0.015473888	0.086387515	0.909	2793	tags=48%, list=22%, signal=61%
GO_HOMOLOGOUS_CHROMOSOME_SEGREGATION	GO_HOMOLOGOUS_CHROMOSOME_SEGREGATION	Details ...	29	0.6608567	1.7394463	0.007952286	0.08850148	0.917	905	tags=31%, list=7%, signal=33%
GO_CONDENSED_CHROMOSOME	GO_CONDENSED_CHROMOSOME	Details ...	148	0.68551785	1.739001	0.004032258	0.0875303	0.92	1523	tags=43%, list=12%, signal=49%
GO_NUCLEIC_ACID_PHOSPHODIESTER_BOND_HYDROLYSIS	GO_NUCLEIC_ACID_PHOSPHODIESTER_BOND_HYDROLYSIS	Details ...	178	0.47688758	1.7380766	0.001992032	0.08713964	0.922	3260	tags=50%, list=26%, signal=67%
GO_CHROMATIN_ORGANIZATION	GO_CHROMATIN_ORGANIZATION	Details ...	495	0.46886572	1.736461	0.011741683	0.08724377	0.926	2916	tags=40%, list=23%, signal=50%
GO_NUCLEOTIDE_EXCISION_REPAIR_DNA_INCISION	GO_NUCLEOTIDE_EXCISION_REPAIR_DNA_INCISION	Details ...	37	0.62533665	1.7361593	0.0060362173	0.08631653	0.926	2793	tags=54%, list=22%, signal=69%
GO_MICROTUBULE_ORGANIZING_CENTER_ORGANIZATION	GO_MICROTUBULE_ORGANIZING_CENTER_ORGANIZATION	Details ...	68	0.62728614	1.7359892	0.009746589	0.08516296	0.926	2296	tags=40%, list=18%, signal=48%
GO_SAGA_TYPE_COMPLEX	GO_SAGA_TYPE_COMPLEX	Details ...	25	0.5710979	1.7341217	0.0137795275	0.08581262	0.927	3398	tags=68%, list=27%, signal=93%
GO_RECIPROCAL_DNA_RECOMBINATION	GO_RECIPROCAL_DNA_RECOMBINATION	Details ...	31	0.67091817	1.7315956	0.003968254	0.08728823	0.934	1265	tags=39%, list=10%, signal=43%
GO_NUCLEOTIDE_EXCISION_REPAIR_PREINCISION_COMPLEX_ASSEMBLY	GO_NUCLEOTIDE_EXCISION_REPAIR_PREINCISION_COMPLEX_ASSEMBLY	Details ...	28	0.5872757	1.7308723	0.02534113	0.08676647	0.934	2793	tags=46%, list=22%, signal=60%
GO_DNA_CONFORMATION_CHANGE	GO_DNA_CONFORMATION_CHANGE	Details ...	203	0.590615	1.7286144	0.015533981	0.08764728	0.94	2941	tags=51%, list=23%, signal=65%
GO_NUCLEOTIDE_EXCISION_REPAIR	GO_NUCLEOTIDE_EXCISION_REPAIR	Details ...	100	0.53383833	1.728555	0.0118811885	0.08649199	0.941	2843	tags=44%, list=23%, signal=56%
GO_DNA_SECONDARY_STRUCTURE_BINDING	GO_DNA_SECONDARY_STRUCTURE_BINDING	Details ...	23	0.7120149	1.7268229	0.003944773	0.087080255	0.946	1777	tags=48%, list=14%, signal=56%
GO_REGULATION_OF_GENE_SILENCING	GO_REGULATION_OF_GENE_SILENCING	Details ...	37	0.5619345	1.7213666	0.0078125	0.09114152	0.951	3528	tags=54%, list=28%, signal=75%
GO_N_METHYLTRANSFERASE_ACTIVITY	GO_N_METHYLTRANSFERASE_ACTIVITY	Details ...	60	0.5240019	1.7189862	0.007984032	0.09259932	0.953	2676	tags=50%, list=21%, signal=63%
GO_DNA_HELICASE_ACTIVITY	GO_DNA_HELICASE_ACTIVITY	Details ...	47	0.6955494	1.7152103	0.0121951215	0.09523983	0.957	2460	tags=62%, list=20%, signal=76%
GO_NUCLEASE_ACTIVITY	GO_NUCLEASE_ACTIVITY	Details ...	138	0.46107787	1.715183	0.0	0.094045006	0.957	3260	tags=51%, list=26%, signal=68%
GO_REGULATION_OF_CENTROSOME_CYCLE	GO_REGULATION_OF_CENTROSOME_CYCLE	Details ...	31	0.71377075	1.714978	0.003875969	0.0930545	0.957	1341	tags=48%, list=11%, signal=54%
GO_GENE_SILENCING_BY_RNA	GO_GENE_SILENCING_BY_RNA	Details ...	98	0.5024799	1.7143967	0.01992032	0.09248896	0.958	3339	tags=48%, list=27%, signal=65%
GO_CELL_CYCLE_PHASE_TRANSITION	GO_CELL_CYCLE_PHASE_TRANSITION	Details ...	225	0.61250913	1.7130655	0.008016032	0.09272247	0.959	1283	tags=35%, list=10%, signal=38%
GO_PIGMENT_BIOSYNTHETIC_PROCESS	GO_PIGMENT_BIOSYNTHETIC_PROCESS	Details ...	42	0.51449496	1.7127483	0.009784736	0.09189024	0.959	3351	tags=55%, list=27%, signal=75%
GO_PRERIBOSOME	GO_PRERIBOSOME	Details ...	45	0.6237604	1.7123603	0.034951456	0.09117448	0.959	3759	tags=71%, list=30%, signal=101%
GO_COVALENT_CHROMATIN_MODIFICATION	GO_COVALENT_CHROMATIN_MODIFICATION	Details ...	272	0.45156008	1.7104987	0.01192843	0.09211181	0.962	3504	tags=44%, list=28%, signal=60%
GO_PROTEIN_LOCALIZATION_TO_CHROMOSOME	GO_PROTEIN_LOCALIZATION_TO_CHROMOSOME	Details ...	35	0.6616871	1.7068421	0.008163265	0.09485226	0.97	427	tags=26%, list=3%, signal=27%
GO_NEGATIVE_REGULATION_OF_MRNA_SPLICING_VIA_SPLICEOSOME	GO_NEGATIVE_REGULATION_OF_MRNA_SPLICING_VIA_SPLICEOSOME	Details ...	15	0.6081472	1.7060959	0.01908397	0.0946782	0.97	3419	tags=60%, list=27%, signal=82%
GO_DNA_REPLICATION	GO_DNA_REPLICATION	Details ...	169	0.660465	1.7060755	0.019723866	0.09361736	0.97	2171	tags=56%, list=17%, signal=67%
GO_DEOXYRIBOSE_PHOSPHATE_CATABOLIC_PROCESS	GO_DEOXYRIBOSE_PHOSPHATE_CATABOLIC_PROCESS	Details ...	17	0.6169339	1.7054434	0.0118811885	0.09312961	0.971	3227	tags=71%, list=26%, signal=95%
GO_CHROMATIN_MODIFICATION	GO_CHROMATIN_MODIFICATION	Details ...	419	0.45789537	1.7035726	0.01980198	0.09413418	0.971	2904	tags=38%, list=23%, signal=48%
GO_KINETOCHORE	GO_KINETOCHORE	Details ...	90	0.72890985	1.7023662	0.0040899795	0.09433227	0.973	1423	tags=48%, list=11%, signal=54%
GO_CHROMOSOME_SEGREGATION	GO_CHROMOSOME_SEGREGATION	Details ...	204	0.69250387	1.7021472	0.008064516	0.09355139	0.974	1357	tags=38%, list=11%, signal=42%
GO_TRANSFERASE_ACTIVITY_TRANSFERRING_ONE_CARBON_GROUPS	GO_TRANSFERASE_ACTIVITY_TRANSFERRING_ONE_CARBON_GROUPS	Details ...	150	0.46189493	1.7019554	0.006085193	0.092721365	0.974	2676	tags=44%, list=21%, signal=55%
GO_ENDODEOXYRIBONUCLEASE_ACTIVITY	GO_ENDODEOXYRIBONUCLEASE_ACTIVITY	Details ...	38	0.583305	1.7018547	0.005964215	0.09180943	0.974	2408	tags=47%, list=19%, signal=58%
GO_KINESIN_COMPLEX	GO_KINESIN_COMPLEX	Details ...	40	0.754835	1.7002068	0.0	0.09236493	0.974	779	tags=30%, list=6%, signal=32%
GO_NEGATIVE_REGULATION_OF_RNA_SPLICING	GO_NEGATIVE_REGULATION_OF_RNA_SPLICING	Details ...	18	0.596674	1.6995084	0.026768642	0.09198228	0.974	3419	tags=56%, list=27%, signal=76%
GO_ATP_DEPENDENT_CHROMATIN_REMODELING	GO_ATP_DEPENDENT_CHROMATIN_REMODELING	Details ...	53	0.6284968	1.6992743	0.022044089	0.091203585	0.974	3760	tags=70%, list=30%, signal=99%
GO_HISTONE_EXCHANGE	GO_HISTONE_EXCHANGE	Details ...	35	0.6980221	1.6984103	0.012072435	0.09112443	0.975	1735	tags=49%, list=14%, signal=56%
GO_NUCLEAR_CHROMOSOME	GO_NUCLEAR_CHROMOSOME	Details ...	410	0.49635953	1.6980779	0.017716536	0.090490736	0.976	2471	tags=39%, list=20%, signal=47%
GO_GENE_SILENCING	GO_GENE_SILENCING	Details ...	143	0.4987813	1.6964502	0.026052104	0.09117047	0.977	3927	tags=54%, list=31%, signal=78%
GO_APOPTOTIC_NUCLEAR_CHANGES	GO_APOPTOTIC_NUCLEAR_CHANGES	Details ...	21	0.56167233	1.6958836	0.004032258	0.09076481	0.977	1654	tags=38%, list=13%, signal=44%
GO_SOMATIC_DIVERSIFICATION_OF_IMMUNE_RECEPTORS	GO_SOMATIC_DIVERSIFICATION_OF_IMMUNE_RECEPTORS	Details ...	36	0.5630118	1.6950924	0.017821781	0.090643644	0.977	1622	tags=36%, list=13%, signal=41%
GO_MEIOTIC_CELL_CYCLE	GO_MEIOTIC_CELL_CYCLE	Details ...	125	0.6025371	1.6937035	0.018255578	0.091125235	0.978	1471	tags=32%, list=12%, signal=36%
GO_RNA_POLYMERASE_COMPLEX	GO_RNA_POLYMERASE_COMPLEX	Details ...	94	0.5006712	1.6929276	0.013806706	0.09109002	0.979	2832	tags=44%, list=23%, signal=56%
GO_SPINDLE_POLE	GO_SPINDLE_POLE	Details ...	90	0.6729022	1.6913861	0.007968128	0.091655426	0.98	845	tags=29%, list=7%, signal=31%
GO_NUCLEAR_REPLICATION_FORK	GO_NUCLEAR_REPLICATION_FORK	Details ...	30	0.6496661	1.691249	0.022944551	0.09091202	0.98	1663	tags=43%, list=13%, signal=50%
GO_NEGATIVE_REGULATION_OF_MITOTIC_NUCLEAR_DIVISION	GO_NEGATIVE_REGULATION_OF_MITOTIC_NUCLEAR_DIVISION	Details ...	31	0.7371844	1.6866995	0.012072435	0.09424797	0.982	1075	tags=42%, list=9%, signal=46%
GO_DEOXYRIBONUCLEASE_ACTIVITY	GO_DEOXYRIBONUCLEASE_ACTIVITY	Details ...	52	0.5419454	1.6865644	0.011976048	0.09348536	0.982	3227	tags=60%, list=26%, signal=80%
GO_MITOTIC_NUCLEAR_DIVISION	GO_MITOTIC_NUCLEAR_DIVISION	Details ...	276	0.6693025	1.6862698	0.008080808	0.09287105	0.982	1585	tags=39%, list=13%, signal=44%
GO_CHROMATIN_SILENCING_AT_RDNA	GO_CHROMATIN_SILENCING_AT_RDNA	Details ...	22	0.6182737	1.6857907	0.018	0.09255702	0.983	3784	tags=64%, list=30%, signal=91%
GO_PRERIBOSOME_LARGE_SUBUNIT_PRECURSOR	GO_PRERIBOSOME_LARGE_SUBUNIT_PRECURSOR	Details ...	16	0.6589014	1.6843313	0.030592734	0.09312843	0.984	3400	tags=69%, list=27%, signal=94%
GO_CHROMATIN_DNA_BINDING	GO_CHROMATIN_DNA_BINDING	Details ...	70	0.4503697	1.6826695	0.015686275	0.09393837	0.985	3808	tags=50%, list=30%, signal=71%
GO_PROTEIN_DNA_COMPLEX_SUBUNIT_ORGANIZATION	GO_PROTEIN_DNA_COMPLEX_SUBUNIT_ORGANIZATION	Details ...	174	0.53564155	1.6824455	0.021611001	0.09333332	0.985	2047	tags=40%, list=16%, signal=47%
GO_DNA_DEPENDENT_DNA_REPLICATION	GO_DNA_DEPENDENT_DNA_REPLICATION	Details ...	81	0.74890965	1.681879	0.00990099	0.092997484	0.985	2280	tags=69%, list=18%, signal=84%
GO_RIBONUCLEOPROTEIN_COMPLEX_LOCALIZATION	GO_RIBONUCLEOPROTEIN_COMPLEX_LOCALIZATION	Details ...	94	0.52679545	1.680216	0.04	0.0939308	0.986	4506	tags=65%, list=36%, signal=101%
GO_NUCLEAR_UBIQUITIN_LIGASE_COMPLEX	GO_NUCLEAR_UBIQUITIN_LIGASE_COMPLEX	Details ...	30	0.70269954	1.6801286	0.0020283975	0.093203664	0.986	1259	tags=33%, list=10%, signal=37%
GO_NEGATIVE_REGULATION_OF_HISTONE_METHYLATION	GO_NEGATIVE_REGULATION_OF_HISTONE_METHYLATION	Details ...	16	0.67850465	1.6788718	0.015564202	0.09350738	0.986	2143	tags=44%, list=17%, signal=53%
GO_G2_DNA_DAMAGE_CHECKPOINT	GO_G2_DNA_DAMAGE_CHECKPOINT	Details ...	29	0.7151472	1.6781921	0.010080645	0.09338843	0.987	910	tags=34%, list=7%, signal=37%
GO_SPINDLE	GO_SPINDLE	Details ...	218	0.62198997	1.6776685	0.0060362173	0.09305768	0.987	1075	tags=29%, list=9%, signal=32%
GO_TRANSCRIPTION_COUPLED_NUCLEOTIDE_EXCISION_REPAIR	GO_TRANSCRIPTION_COUPLED_NUCLEOTIDE_EXCISION_REPAIR	Details ...	68	0.53126794	1.676139	0.03137255	0.09383847	0.987	2843	tags=44%, list=23%, signal=57%
GO_DNA_DEPENDENT_ATPASE_ACTIVITY	GO_DNA_DEPENDENT_ATPASE_ACTIVITY	Details ...	68	0.5970538	1.6761364	0.017509727	0.0930616	0.987	2460	tags=51%, list=20%, signal=64%
GO_MICROTUBULE_ASSOCIATED_COMPLEX	GO_MICROTUBULE_ASSOCIATED_COMPLEX	Details ...	110	0.5488301	1.6754642	0.014256619	0.092931405	0.987	1075	tags=19%, list=9%, signal=21%
GO_MLL1_2_COMPLEX	GO_MLL1_2_COMPLEX	Details ...	22	0.59623796	1.6753336	0.026156941	0.0922857	0.988	4233	tags=82%, list=34%, signal=123%
GO_CUL4_RING_E3_UBIQUITIN_LIGASE_COMPLEX	GO_CUL4_RING_E3_UBIQUITIN_LIGASE_COMPLEX	Details ...	21	0.63035786	1.6742165	0.0139442235	0.09262099	0.988	3278	tags=62%, list=26%, signal=84%
GO_REGULATION_OF_CHROMOSOME_SEGREGATION	GO_REGULATION_OF_CHROMOSOME_SEGREGATION	Details ...	67	0.75342226	1.6728647	0.008097166	0.09311215	0.989	1138	tags=39%, list=9%, signal=42%
GO_DNA_STRAND_ELONGATION	GO_DNA_STRAND_ELONGATION	Details ...	30	0.7617066	1.6716864	0.009727626	0.09354777	0.991	2159	tags=77%, list=17%, signal=92%
GO_SPLICEOSOMAL_SNRNP_ASSEMBLY	GO_SPLICEOSOMAL_SNRNP_ASSEMBLY	Details ...	32	0.6154637	1.6711291	0.034749035	0.09336007	0.991	3447	tags=69%, list=28%, signal=95%
GO_SYNAPTONEMAL_COMPLEX	GO_SYNAPTONEMAL_COMPLEX	Details ...	25	0.596141	1.6699325	0.007984032	0.09369104	0.991	1319	tags=36%, list=11%, signal=40%
GO_DNA_DEPENDENT_DNA_REPLICATION_MAINTENANCE_OF_FIDELITY	GO_DNA_DEPENDENT_DNA_REPLICATION_MAINTENANCE_OF_FIDELITY	Details ...	15	0.74566877	1.6671675	0.01417004	0.095378175	0.991	2244	tags=67%, list=18%, signal=81%
GO_ATP_DEPENDENT_DNA_HELICASE_ACTIVITY	GO_ATP_DEPENDENT_DNA_HELICASE_ACTIVITY	Details ...	30	0.6169964	1.6664989	0.0140280565	0.09525181	0.991	2845	tags=57%, list=23%, signal=73%
GO_RNA_POLYMERASE_ACTIVITY	GO_RNA_POLYMERASE_ACTIVITY	Details ...	32	0.6096302	1.6662285	0.028462999	0.09479623	0.991	2832	tags=56%, list=23%, signal=72%
GO_REPLISOME	GO_REPLISOME	Details ...	24	0.6844618	1.6660677	0.0114722755	0.09420359	0.991	912	tags=42%, list=7%, signal=45%
GO_ACETYLTRANSFERASE_COMPLEX	GO_ACETYLTRANSFERASE_COMPLEX	Details ...	68	0.5304591	1.6658902	0.031809144	0.09364979	0.991	4051	tags=66%, list=32%, signal=97%
GO_CELL_DIVISION	GO_CELL_DIVISION	Details ...	345	0.6122144	1.6656466	0.020283977	0.09316378	0.991	1585	tags=34%, list=13%, signal=38%
GO_CELL_CYCLE_CHECKPOINT	GO_CELL_CYCLE_CHECKPOINT	Details ...	165	0.61564225	1.6637472	0.017928287	0.09440633	0.991	1090	tags=32%, list=9%, signal=34%
GO_SISTER_CHROMATID_COHESION	GO_SISTER_CHROMATID_COHESION	Details ...	88	0.71740866	1.6636834	0.013916501	0.09377093	0.991	1357	tags=44%, list=11%, signal=49%
GO_NUCLEOSOME_BINDING	GO_NUCLEOSOME_BINDING	Details ...	37	0.5488685	1.6635534	0.031746034	0.09319433	0.991	3760	tags=59%, list=30%, signal=85%
GO_NUCLEAR_CHROMOSOME_SEGREGATION	GO_NUCLEAR_CHROMOSOME_SEGREGATION	Details ...	172	0.7010989	1.6627538	0.012244898	0.09320888	0.991	1357	tags=40%, list=11%, signal=44%
GO_MEDIATOR_COMPLEX	GO_MEDIATOR_COMPLEX	Details ...	24	0.5491462	1.6623609	0.030592734	0.09294266	0.992	3628	tags=58%, list=29%, signal=82%
GO_NEGATIVE_REGULATION_OF_CELL_CYCLE_PROCESS	GO_NEGATIVE_REGULATION_OF_CELL_CYCLE_PROCESS	Details ...	182	0.5226813	1.6611532	0.018	0.0932038	0.993	1330	tags=30%, list=11%, signal=33%
GO_REPLICATION_FORK	GO_REPLICATION_FORK	Details ...	49	0.6569882	1.6609666	0.02739726	0.09271457	0.993	1901	tags=49%, list=15%, signal=58%
GO_NEGATIVE_REGULATION_OF_CHROMOSOME_ORGANIZATION	GO_NEGATIVE_REGULATION_OF_CHROMOSOME_ORGANIZATION	Details ...	89	0.5427139	1.6607623	0.037037037	0.092234455	0.993	2663	tags=38%, list=21%, signal=48%
GO_MOTOR_ACTIVITY	GO_MOTOR_ACTIVITY	Details ...	96	0.5201509	1.6607114	0.021276595	0.09162293	0.993	1351	tags=22%, list=11%, signal=24%
GO_STRAND_DISPLACEMENT	GO_STRAND_DISPLACEMENT	Details ...	25	0.7743547	1.6604059	0.015594542	0.091341816	0.993	1009	tags=52%, list=8%, signal=56%
GO_CONDENSED_CHROMOSOME_CENTROMERIC_REGION	GO_CONDENSED_CHROMOSOME_CENTROMERIC_REGION	Details ...	75	0.7432935	1.6564981	0.010141988	0.09446844	0.994	1423	tags=52%, list=11%, signal=58%
GO_METHYLTRANSFERASE_COMPLEX	GO_METHYLTRANSFERASE_COMPLEX	Details ...	71	0.54211336	1.6546828	0.06175299	0.095682986	0.994	3738	tags=63%, list=30%, signal=90%
GO_NEGATIVE_REGULATION_OF_NUCLEAR_DIVISION	GO_NEGATIVE_REGULATION_OF_NUCLEAR_DIVISION	Details ...	40	0.68060064	1.6535801	0.025948104	0.09589937	0.995	1075	tags=38%, list=9%, signal=41%
GO_EXONUCLEASE_ACTIVITY	GO_EXONUCLEASE_ACTIVITY	Details ...	54	0.54983866	1.653531	0.01953125	0.09529379	0.995	3172	tags=57%, list=25%, signal=77%
GO_N_ACETYLTRANSFERASE_ACTIVITY	GO_N_ACETYLTRANSFERASE_ACTIVITY	Details ...	61	0.4794621	1.653355	0.018	0.09478703	0.995	4051	tags=62%, list=32%, signal=92%
GO_REGULATION_OF_SISTER_CHROMATID_SEGREGATION	GO_REGULATION_OF_SISTER_CHROMATID_SEGREGATION	Details ...	54	0.7281384	1.6517357	0.012219959	0.09574411	0.996	1138	tags=37%, list=9%, signal=41%
GO_CYCLIN_DEPENDENT_PROTEIN_KINASE_ACTIVITY	GO_CYCLIN_DEPENDENT_PROTEIN_KINASE_ACTIVITY	Details ...	29	0.6084111	1.6511079	0.022357723	0.0956186	0.996	1899	tags=45%, list=15%, signal=53%
GO_CENTROMERE_COMPLEX_ASSEMBLY	GO_CENTROMERE_COMPLEX_ASSEMBLY	Details ...	32	0.75847745	1.650899	0.010204081	0.09514519	0.996	1735	tags=59%, list=14%, signal=69%
GO_DNA_STRAND_ELONGATION_INVOLVED_IN_DNA_REPLICATION	GO_DNA_STRAND_ELONGATION_INVOLVED_IN_DNA_REPLICATION	Details ...	25	0.7990177	1.6485502	0.009784736	0.0968703	0.996	1566	tags=76%, list=12%, signal=87%
GO_CENTROSOME	GO_CENTROSOME	Details ...	359	0.48194766	1.6471206	0.010162601	0.09771106	0.996	2296	tags=32%, list=18%, signal=38%
GO_ANTEROGRADE_AXONAL_TRANSPORT	GO_ANTEROGRADE_AXONAL_TRANSPORT	Details ...	15	0.6094862	1.6454166	0.018442623	0.09863086	0.996	750	tags=13%, list=6%, signal=14%
GO_RIBOSOMAL_SMALL_SUBUNIT_BIOGENESIS	GO_RIBOSOMAL_SMALL_SUBUNIT_BIOGENESIS	Details ...	47	0.55981547	1.6436762	0.08159393	0.09961116	0.996	3917	tags=62%, list=31%, signal=89%
GO_SISTER_CHROMATID_SEGREGATION	GO_SISTER_CHROMATID_SEGREGATION	Details ...	140	0.7345128	1.6415815	0.014084507	0.10095953	0.997	1357	tags=43%, list=11%, signal=48%
GO_PROTEIN_METHYLTRANSFERASE_ACTIVITY	GO_PROTEIN_METHYLTRANSFERASE_ACTIVITY	Details ...	57	0.52585685	1.6393138	0.034274194	0.102618136	0.997	3797	tags=65%, list=30%, signal=93%
GO_MICROTUBULE_ORGANIZING_CENTER	GO_MICROTUBULE_ORGANIZING_CENTER	Details ...	448	0.4603572	1.6391658	0.01183432	0.10207962	0.997	2314	tags=30%, list=18%, signal=36%
GO_PROTEIN_DNA_COMPLEX	GO_PROTEIN_DNA_COMPLEX	Details ...	125	0.5499433	1.6387571	0.02739726	0.10182143	0.997	3485	tags=50%, list=28%, signal=69%
GO_DEOXYRIBONUCLEOTIDE_METABOLIC_PROCESS	GO_DEOXYRIBONUCLEOTIDE_METABOLIC_PROCESS	Details ...	28	0.587947	1.6382426	0.027888447	0.1017511	0.997	2483	tags=50%, list=20%, signal=62%
GO_SMALL_NUCLEAR_RIBONUCLEOPROTEIN_COMPLEX	GO_SMALL_NUCLEAR_RIBONUCLEOPROTEIN_COMPLEX	Details ...	47	0.5774527	1.6382155	0.078895465	0.10114894	0.997	3765	tags=72%, list=30%, signal=103%
GO_REGULATION_OF_HISTONE_H3_K9_METHYLATION	GO_REGULATION_OF_HISTONE_H3_K9_METHYLATION	Details ...	15	0.65008444	1.636252	0.02008032	0.10248836	0.997	873	tags=27%, list=7%, signal=29%
GO_TERMINATION_OF_RNA_POLYMERASE_II_TRANSCRIPTION	GO_TERMINATION_OF_RNA_POLYMERASE_II_TRANSCRIPTION	Details ...	47	0.56349415	1.6362427	0.0546875	0.10186505	0.997	2244	tags=40%, list=18%, signal=49%
GO_NEGATIVE_REGULATION_OF_CHROMOSOME_SEGREGATION	GO_NEGATIVE_REGULATION_OF_CHROMOSOME_SEGREGATION	Details ...	27	0.7403097	1.6358455	0.022	0.10162163	0.997	1075	tags=41%, list=9%, signal=44%
GO_FOUR_WAY_JUNCTION_DNA_BINDING	GO_FOUR_WAY_JUNCTION_DNA_BINDING	Details ...	15	0.6882213	1.6311669	0.03696498	0.10591459	0.997	2331	tags=53%, list=19%, signal=65%
GO_RNA_MODIFICATION	GO_RNA_MODIFICATION	Details ...	74	0.48152196	1.6301144	0.05479452	0.10639957	0.997	4051	tags=58%, list=32%, signal=85%
GO_NUCLEOTIDYLTRANSFERASE_ACTIVITY	GO_NUCLEOTIDYLTRANSFERASE_ACTIVITY	Details ...	96	0.4789718	1.6294981	0.023715414	0.10639832	0.997	3076	tags=47%, list=25%, signal=62%
GO_DNA_TEMPLATED_TRANSCRIPTION_TERMINATION	GO_DNA_TEMPLATED_TRANSCRIPTION_TERMINATION	Details ...	78	0.53176326	1.6271789	0.0513834	0.108072914	0.998	2481	tags=42%, list=20%, signal=52%
GO_DNA_PACKAGING	GO_DNA_PACKAGING	Details ...	133	0.59167117	1.626253	0.029821074	0.108340405	0.998	2031	tags=38%, list=16%, signal=45%
GO_NEGATIVE_REGULATION_OF_CELL_DIVISION	GO_NEGATIVE_REGULATION_OF_CELL_DIVISION	Details ...	48	0.6931837	1.6255244	0.02016129	0.10857823	0.998	1075	tags=40%, list=9%, signal=43%
GO_RNA_SPLICING_VIA_TRANSESTERIFICATION_REACTIONS	GO_RNA_SPLICING_VIA_TRANSESTERIFICATION_REACTIONS	Details ...	209	0.47305182	1.624345	0.07874016	0.10920654	0.998	3937	tags=53%, list=31%, signal=75%
GO_S_ADENOSYLMETHIONINE_DEPENDENT_METHYLTRANSFERASE_ACTIVITY	GO_S_ADENOSYLMETHIONINE_DEPENDENT_METHYLTRANSFERASE_ACTIVITY	Details ...	96	0.4725859	1.6238258	0.020746889	0.10913037	0.998	2615	tags=45%, list=21%, signal=56%
GO_MICROTUBULE	GO_MICROTUBULE	Details ...	296	0.47025	1.6237347	0.012	0.108577654	0.998	1646	tags=24%, list=13%, signal=27%
GO_REGULATION_OF_DOUBLE_STRAND_BREAK_REPAIR	GO_REGULATION_OF_DOUBLE_STRAND_BREAK_REPAIR	Details ...	26	0.6398519	1.6237319	0.027613413	0.10795688	0.998	1663	tags=46%, list=13%, signal=53%
GO_LYSINE_N_METHYLTRANSFERASE_ACTIVITY	GO_LYSINE_N_METHYLTRANSFERASE_ACTIVITY	Details ...	36	0.5665023	1.6233906	0.02004008	0.107677855	0.998	2615	tags=56%, list=21%, signal=70%
GO_NEGATIVE_REGULATION_OF_GENE_EXPRESSION_EPIGENETIC	GO_NEGATIVE_REGULATION_OF_GENE_EXPRESSION_EPIGENETIC	Details ...	68	0.56028426	1.6227847	0.029821074	0.10768657	0.998	3927	tags=60%, list=31%, signal=87%
GO_NEGATIVE_REGULATION_OF_CELLULAR_PROTEIN_CATABOLIC_PROCESS	GO_NEGATIVE_REGULATION_OF_CELLULAR_PROTEIN_CATABOLIC_PROCESS	Details ...	51	0.5845445	1.6226536	0.019880716	0.10719369	0.998	1075	tags=24%, list=9%, signal=26%
GO_POSITIVE_REGULATION_OF_GENE_EXPRESSION_EPIGENETIC	GO_POSITIVE_REGULATION_OF_GENE_EXPRESSION_EPIGENETIC	Details ...	59	0.5189445	1.6217959	0.03359684	0.10747988	0.998	2844	tags=46%, list=23%, signal=59%
GO_DNA_REPLICATION_DEPENDENT_NUCLEOSOME_ORGANIZATION	GO_DNA_REPLICATION_DEPENDENT_NUCLEOSOME_ORGANIZATION	Details ...	22	0.655276	1.6208792	0.043650795	0.10784018	0.998	3832	tags=77%, list=31%, signal=111%
GO_REGULATION_OF_NUCLEAR_DIVISION	GO_REGULATION_OF_NUCLEAR_DIVISION	Details ...	134	0.5654203	1.6207184	0.03258656	0.1074176	0.998	1138	tags=27%, list=9%, signal=29%
GO_REGULATION_OF_CENTROSOME_DUPLICATION	GO_REGULATION_OF_CENTROSOME_DUPLICATION	Details ...	24	0.61034286	1.6203719	0.032380953	0.107169405	0.998	1331	tags=42%, list=11%, signal=47%
GO_DNA_INTEGRITY_CHECKPOINT	GO_DNA_INTEGRITY_CHECKPOINT	Details ...	125	0.57087654	1.6192254	0.025641026	0.10774489	0.998	1090	tags=30%, list=9%, signal=32%
GO_90S_PRERIBOSOME	GO_90S_PRERIBOSOME	Details ...	19	0.6365295	1.6172869	0.06876228	0.10917243	0.998	3911	tags=74%, list=31%, signal=107%
GO_REGULATION_OF_CHROMOSOME_ORGANIZATION	GO_REGULATION_OF_CHROMOSOME_ORGANIZATION	Details ...	223	0.47359204	1.6163075	0.022088353	0.10945011	0.998	2236	tags=28%, list=18%, signal=34%
GO_TRNA_METABOLIC_PROCESS	GO_TRNA_METABOLIC_PROCESS	Details ...	120	0.5130016	1.6138091	0.06666667	0.11148525	0.998	3797	tags=62%, list=30%, signal=88%
GO_PEPTIDE_N_ACETYLTRANSFERASE_ACTIVITY	GO_PEPTIDE_N_ACETYLTRANSFERASE_ACTIVITY	Details ...	50	0.50687927	1.6135778	0.03206413	0.11113384	0.998	4051	tags=64%, list=32%, signal=94%
GO_HISTONE_METHYLTRANSFERASE_COMPLEX	GO_HISTONE_METHYLTRANSFERASE_COMPLEX	Details ...	55	0.5293012	1.6116314	0.071570575	0.11250527	0.998	4045	tags=67%, list=32%, signal=99%
GO_PURINE_NUCLEOSIDE_MONOPHOSPHATE_BIOSYNTHETIC_PROCESS	GO_PURINE_NUCLEOSIDE_MONOPHOSPHATE_BIOSYNTHETIC_PROCESS	Details ...	50	0.45806727	1.6114559	0.03868472	0.112088546	0.998	3352	tags=42%, list=27%, signal=57%
GO_NON_RECOMBINATIONAL_REPAIR	GO_NON_RECOMBINATIONAL_REPAIR	Details ...	53	0.5594219	1.6104748	0.048582997	0.11255066	0.998	2810	tags=51%, list=22%, signal=65%
GO_RIBONUCLEOPROTEIN_COMPLEX_SUBUNIT_ORGANIZATION	GO_RIBONUCLEOPROTEIN_COMPLEX_SUBUNIT_ORGANIZATION	Details ...	153	0.47443193	1.609915	0.11025145	0.112510644	0.998	3776	tags=47%, list=30%, signal=67%
GO_RNA_POLYMERASE_II_CARBOXY_TERMINAL_DOMAIN_KINASE_ACTIVITY	GO_RNA_POLYMERASE_II_CARBOXY_TERMINAL_DOMAIN_KINASE_ACTIVITY	Details ...	15	0.66803086	1.6095666	0.009940358	0.11231152	0.998	1793	tags=47%, list=14%, signal=54%
GO_CHROMOSOME_CONDENSATION	GO_CHROMOSOME_CONDENSATION	Details ...	24	0.8168439	1.6093924	0.017964073	0.11187438	0.998	251	tags=38%, list=2%, signal=38%
GO_POSITIVE_REGULATION_OF_CHROMOSOME_SEGREGATION	GO_POSITIVE_REGULATION_OF_CHROMOSOME_SEGREGATION	Details ...	20	0.7807243	1.6084138	0.007843138	0.11232342	0.998	427	tags=30%, list=3%, signal=31%
GO_CHROMATIN_ASSEMBLY_OR_DISASSEMBLY	GO_CHROMATIN_ASSEMBLY_OR_DISASSEMBLY	Details ...	122	0.54300576	1.6080047	0.03777336	0.11210361	0.998	2031	tags=39%, list=16%, signal=46%
GO_MULTICELLULAR_ORGANISM_AGING	GO_MULTICELLULAR_ORGANISM_AGING	Details ...	24	0.56942004	1.6078022	0.015873017	0.111762375	0.998	1233	tags=25%, list=10%, signal=28%
GO_HISTONE_BINDING	GO_HISTONE_BINDING	Details ...	128	0.469298	1.6065483	0.04040404	0.112443954	0.998	2842	tags=40%, list=23%, signal=51%
GO_SMALL_SUBUNIT_PROCESSOME	GO_SMALL_SUBUNIT_PROCESSOME	Details ...	27	0.634099	1.60641	0.059760958	0.11204292	0.998	3759	tags=74%, list=30%, signal=106%
GO_SOMATIC_DIVERSIFICATION_OF_IMMUNOGLOBULINS	GO_SOMATIC_DIVERSIFICATION_OF_IMMUNOGLOBULINS	Details ...	23	0.5743717	1.6048799	0.03960396	0.11303169	0.998	2077	tags=39%, list=17%, signal=47%
GO_MITOTIC_CELL_CYCLE_CHECKPOINT	GO_MITOTIC_CELL_CYCLE_CHECKPOINT	Details ...	122	0.58766377	1.6047658	0.022494888	0.11261593	0.998	1090	tags=31%, list=9%, signal=34%
GO_CELL_CYCLE_G1_S_PHASE_TRANSITION	GO_CELL_CYCLE_G1_S_PHASE_TRANSITION	Details ...	97	0.63332134	1.6043307	0.020283977	0.11252994	0.998	1283	tags=43%, list=10%, signal=48%
GO_RIBOSOMAL_LARGE_SUBUNIT_BIOGENESIS	GO_RIBOSOMAL_LARGE_SUBUNIT_BIOGENESIS	Details ...	38	0.5472676	1.6042951	0.077220075	0.11200738	0.998	3728	tags=53%, list=30%, signal=75%
GO_N_ACYLTRANSFERASE_ACTIVITY	GO_N_ACYLTRANSFERASE_ACTIVITY	Details ...	70	0.45927787	1.6005319	0.025641026	0.11549306	0.998	4051	tags=57%, list=32%, signal=84%
GO_TRANSLESION_SYNTHESIS	GO_TRANSLESION_SYNTHESIS	Details ...	33	0.6375447	1.6001788	0.032945737	0.115300246	0.998	1005	tags=33%, list=8%, signal=36%
GO_NCRNA_TRANSCRIPTION	GO_NCRNA_TRANSCRIPTION	Details ...	70	0.47849423	1.5990589	0.056751467	0.11587835	0.998	3746	tags=50%, list=30%, signal=71%
GO_SINGLE_STRANDED_DNA_BINDING	GO_SINGLE_STRANDED_DNA_BINDING	Details ...	77	0.5128457	1.5976532	0.034068137	0.11679467	0.998	2533	tags=43%, list=20%, signal=53%
GO_DNA_TEMPLATED_TRANSCRIPTION_ELONGATION	GO_DNA_TEMPLATED_TRANSCRIPTION_ELONGATION	Details ...	82	0.49163342	1.5973037	0.052427184	0.11655263	0.998	2844	tags=45%, list=23%, signal=58%
GO_REGULATION_OF_SIGNAL_TRANSDUCTION_BY_P53_CLASS_MEDIATOR	GO_REGULATION_OF_SIGNAL_TRANSDUCTION_BY_P53_CLASS_MEDIATOR	Details ...	141	0.47346136	1.5969845	0.031558186	0.11633178	0.998	2070	tags=36%, list=17%, signal=43%
GO_OOCYTE_DIFFERENTIATION	GO_OOCYTE_DIFFERENTIATION	Details ...	27	0.61413866	1.596491	0.022403259	0.116303585	0.998	241	tags=22%, list=2%, signal=23%
GO_SPINDLE_MICROTUBULE	GO_SPINDLE_MICROTUBULE	Details ...	50	0.71710235	1.5963314	0.0061601643	0.11591413	0.998	469	tags=34%, list=4%, signal=35%
GO_REGULATION_OF_DNA_DEPENDENT_DNA_REPLICATION	GO_REGULATION_OF_DNA_DEPENDENT_DNA_REPLICATION	Details ...	33	0.6576005	1.5934181	0.036585364	0.11856205	0.999	1522	tags=48%, list=12%, signal=55%
GO_REGULATION_OF_HISTONE_H3_K4_METHYLATION	GO_REGULATION_OF_HISTONE_H3_K4_METHYLATION	Details ...	22	0.52919436	1.5932858	0.044265594	0.11812127	0.999	2230	tags=41%, list=18%, signal=50%
GO_CENTROSOME_CYCLE	GO_CENTROSOME_CYCLE	Details ...	38	0.66111207	1.5930564	0.017681729	0.11779936	0.999	1710	tags=39%, list=14%, signal=46%
GO_FATTY_ACYL_COA_METABOLIC_PROCESS	GO_FATTY_ACYL_COA_METABOLIC_PROCESS	Details ...	34	0.6080799	1.5911616	0.025590552	0.11916378	0.999	1874	tags=44%, list=15%, signal=52%
GO_CHROMATIN_SILENCING	GO_CHROMATIN_SILENCING	Details ...	55	0.5415437	1.5907782	0.051485147	0.11896174	0.999	3927	tags=58%, list=31%, signal=84%
GO_ATP_DEPENDENT_MICROTUBULE_MOTOR_ACTIVITY	GO_ATP_DEPENDENT_MICROTUBULE_MOTOR_ACTIVITY	Details ...	15	0.8423947	1.5894136	0.0020120724	0.119851395	0.999	516	tags=40%, list=4%, signal=42%
GO_SKELETAL_MUSCLE_CONTRACTION	GO_SKELETAL_MUSCLE_CONTRACTION	Details ...	27	0.5522952	1.5876681	0.017441861	0.12132845	1.0	2751	tags=30%, list=22%, signal=38%
GO_EXON_EXON_JUNCTION_COMPLEX	GO_EXON_EXON_JUNCTION_COMPLEX	Details ...	17	0.55460036	1.5856963	0.048732944	0.12294711	1.0	4751	tags=76%, list=38%, signal=123%
GO_ANAPHASE_PROMOTING_COMPLEX_DEPENDENT_CATABOLIC_PROCESS	GO_ANAPHASE_PROMOTING_COMPLEX_DEPENDENT_CATABOLIC_PROCESS	Details ...	66	0.6366012	1.5840206	0.03006012	0.124198966	1.0	427	tags=18%, list=3%, signal=19%
GO_PROTEIN_SUMOYLATION	GO_PROTEIN_SUMOYLATION	Details ...	101	0.50917	1.5839487	0.0665362	0.123690926	1.0	2578	tags=41%, list=21%, signal=51%
GO_DNA_DIRECTED_RNA_POLYMERASE_II_HOLOENZYME	GO_DNA_DIRECTED_RNA_POLYMERASE_II_HOLOENZYME	Details ...	77	0.4454646	1.5837278	0.051233396	0.12341956	1.0	2832	tags=38%, list=23%, signal=48%
GO_RNA_METHYLATION	GO_RNA_METHYLATION	Details ...	35	0.5072883	1.5831172	0.071287125	0.12351707	1.0	4172	tags=66%, list=33%, signal=98%
GO_MATURATION_OF_SSU_RRNA	GO_MATURATION_OF_SSU_RRNA	Details ...	33	0.6001377	1.5823505	0.07514451	0.12374309	1.0	3917	tags=70%, list=31%, signal=101%
GO_REGULATION_OF_TRANSCRIPTION_INVOLVED_IN_G1_S_TRANSITION_OF_MITOTIC_CELL_CYCLE	GO_REGULATION_OF_TRANSCRIPTION_INVOLVED_IN_G1_S_TRANSITION_OF_MITOTIC_CELL_CYCLE	Details ...	24	0.7914891	1.5821712	0.02020202	0.12338716	1.0	1283	tags=58%, list=10%, signal=65%
GO_NUCLEOSOMAL_DNA_BINDING	GO_NUCLEOSOMAL_DNA_BINDING	Details ...	26	0.5451366	1.5818113	0.066797644	0.12322377	1.0	3760	tags=65%, list=30%, signal=93%
GO_MITOTIC_G2_M_TRANSITION_CHECKPOINT	GO_MITOTIC_G2_M_TRANSITION_CHECKPOINT	Details ...	16	0.70112336	1.5809331	0.028056113	0.12353926	1.0	910	tags=31%, list=7%, signal=34%
GO_RRNA_MODIFICATION	GO_RRNA_MODIFICATION	Details ...	17	0.6118896	1.5805985	0.06288032	0.12337595	1.0	3842	tags=71%, list=31%, signal=102%
GO_RETROGRADE_VESICLE_MEDIATED_TRANSPORT_GOLGI_TO_ER	GO_RETROGRADE_VESICLE_MEDIATED_TRANSPORT_GOLGI_TO_ER	Details ...	64	0.57894343	1.5800508	0.028688524	0.1233958	1.0	165	tags=13%, list=1%, signal=13%
GO_REGULATION_OF_GENE_EXPRESSION_EPIGENETIC	GO_REGULATION_OF_GENE_EXPRESSION_EPIGENETIC	Details ...	161	0.45899063	1.578813	0.03522505	0.124061204	1.0	3927	tags=52%, list=31%, signal=75%
GO_MICROTUBULE_BASED_MOVEMENT	GO_MICROTUBULE_BASED_MOVEMENT	Details ...	141	0.47524568	1.5769911	0.033398822	0.12556437	1.0	796	tags=13%, list=6%, signal=13%
GO_MACROMOLECULE_METHYLATION	GO_MACROMOLECULE_METHYLATION	Details ...	141	0.4079645	1.5768473	0.025540275	0.12517406	1.0	3830	tags=55%, list=31%, signal=78%
GO_CHROMOSOME_ORGANIZATION_INVOLVED_IN_MEIOTIC_CELL_CYCLE	GO_CHROMOSOME_ORGANIZATION_INVOLVED_IN_MEIOTIC_CELL_CYCLE	Details ...	31	0.57371956	1.5763931	0.037924152	0.12522432	1.0	2355	tags=39%, list=19%, signal=48%
GO_REGULATION_OF_SPINDLE_ORGANIZATION	GO_REGULATION_OF_SPINDLE_ORGANIZATION	Details ...	15	0.68868047	1.5750358	0.023391813	0.1261323	1.0	1075	tags=33%, list=9%, signal=36%
GO_HISTONE_PHOSPHORYLATION	GO_HISTONE_PHOSPHORYLATION	Details ...	23	0.71929646	1.5748531	0.02584493	0.12575555	1.0	1431	tags=52%, list=11%, signal=59%
GO_ENDONUCLEASE_ACTIVITY	GO_ENDONUCLEASE_ACTIVITY	Details ...	85	0.42913762	1.5746927	0.011976048	0.12538722	1.0	3260	tags=48%, list=26%, signal=65%
GO_MIDBODY	GO_MIDBODY	Details ...	101	0.5893227	1.5741235	0.042168673	0.12548171	1.0	750	tags=25%, list=6%, signal=26%
GO_POSITIVE_REGULATION_OF_CELL_CYCLE_PHASE_TRANSITION	GO_POSITIVE_REGULATION_OF_CELL_CYCLE_PHASE_TRANSITION	Details ...	53	0.5579268	1.5735049	0.01778656	0.12556851	1.0	697	tags=23%, list=6%, signal=24%
GO_ACETYLTRANSFERASE_ACTIVITY	GO_ACETYLTRANSFERASE_ACTIVITY	Details ...	76	0.44151637	1.5734411	0.030241935	0.12510441	1.0	4055	tags=59%, list=32%, signal=87%
GO_RNA_LOCALIZATION	GO_RNA_LOCALIZATION	Details ...	144	0.46547654	1.572729	0.06930693	0.12533288	1.0	4135	tags=57%, list=33%, signal=84%
GO_NUCLEAR_EXPORT	GO_NUCLEAR_EXPORT	Details ...	114	0.459063	1.5707159	0.084645666	0.12691115	1.0	4506	tags=61%, list=36%, signal=94%
GO_MITOTIC_SISTER_CHROMATID_SEGREGATION	GO_MITOTIC_SISTER_CHROMATID_SEGREGATION	Details ...	75	0.76761746	1.5703422	0.016427105	0.1267713	1.0	469	tags=36%, list=4%, signal=37%
GO_TRNA_PROCESSING	GO_TRNA_PROCESSING	Details ...	75	0.50379056	1.5703069	0.07722772	0.12627338	1.0	3096	tags=51%, list=25%, signal=67%
GO_CATALYTIC_STEP_2_SPLICEOSOME	GO_CATALYTIC_STEP_2_SPLICEOSOME	Details ...	66	0.52752626	1.569371	0.098076925	0.12683423	1.0	3937	tags=62%, list=31%, signal=90%
GO_POSTREPLICATION_REPAIR	GO_POSTREPLICATION_REPAIR	Details ...	41	0.6182975	1.5674924	0.04863813	0.12844393	1.0	1005	tags=34%, list=8%, signal=37%
GO_CENTRIOLE_ASSEMBLY	GO_CENTRIOLE_ASSEMBLY	Details ...	15	0.61729693	1.5669515	0.056112226	0.12850781	1.0	2296	tags=47%, list=18%, signal=57%
GO_MALE_MEIOSIS	GO_MALE_MEIOSIS	Details ...	26	0.6254252	1.566667	0.024193548	0.12829468	1.0	905	tags=23%, list=7%, signal=25%
GO_MRNA_3_END_PROCESSING	GO_MRNA_3_END_PROCESSING	Details ...	54	0.49178874	1.5664088	0.076171875	0.12805636	1.0	2244	tags=37%, list=18%, signal=45%
GO_LRR_DOMAIN_BINDING	GO_LRR_DOMAIN_BINDING	Details ...	16	0.5373114	1.5659158	0.047131147	0.12809467	1.0	3290	tags=50%, list=26%, signal=68%
GO_SPINDLE_CHECKPOINT	GO_SPINDLE_CHECKPOINT	Details ...	23	0.7683762	1.5636114	0.022494888	0.13018055	1.0	1075	tags=48%, list=9%, signal=52%
GO_REGULATION_OF_MRNA_METABOLIC_PROCESS	GO_REGULATION_OF_MRNA_METABOLIC_PROCESS	Details ...	84	0.4233828	1.5628971	0.05927342	0.13054691	1.0	3823	tags=48%, list=31%, signal=68%
GO_MRNA_PROCESSING	GO_MRNA_PROCESSING	Details ...	316	0.42472208	1.5623878	0.08704454	0.13056135	1.0	3794	tags=50%, list=30%, signal=70%
GO_REGULATION_OF_CELL_DIVISION	GO_REGULATION_OF_CELL_DIVISION	Details ...	216	0.5114752	1.5609293	0.032258064	0.13161592	1.0	1075	tags=23%, list=9%, signal=25%
GO_COENZYME_A_METABOLIC_PROCESS	GO_COENZYME_A_METABOLIC_PROCESS	Details ...	15	0.6158769	1.5607146	0.03696498	0.1313134	1.0	2837	tags=47%, list=23%, signal=60%
GO_ATPASE_ACTIVITY	GO_ATPASE_ACTIVITY	Details ...	337	0.39423406	1.5581741	0.023715414	0.1336861	1.0	2368	tags=28%, list=19%, signal=33%
GO_BLASTOCYST_DEVELOPMENT	GO_BLASTOCYST_DEVELOPMENT	Details ...	45	0.5302189	1.5549158	0.020408163	0.13686109	1.0	1384	tags=29%, list=11%, signal=32%
GO_SPLICEOSOMAL_TRI_SNRNP_COMPLEX	GO_SPLICEOSOMAL_TRI_SNRNP_COMPLEX	Details ...	23	0.6245984	1.5545586	0.06719368	0.13675217	1.0	3672	tags=74%, list=29%, signal=104%
GO_RNA_3_END_PROCESSING	GO_RNA_3_END_PROCESSING	Details ...	70	0.4857215	1.5533875	0.086872585	0.13754801	1.0	3245	tags=46%, list=26%, signal=61%
GO_HYDROLASE_ACTIVITY_HYDROLYZING_N_GLYCOSYL_COMPOUNDS	GO_HYDROLASE_ACTIVITY_HYDROLYZING_N_GLYCOSYL_COMPOUNDS	Details ...	18	0.570272	1.5485494	0.009803922	0.14256345	1.0	1954	tags=39%, list=16%, signal=46%
GO_TELOMERASE_HOLOENZYME_COMPLEX	GO_TELOMERASE_HOLOENZYME_COMPLEX	Details ...	17	0.5887762	1.5482521	0.0741483	0.14234821	1.0	4226	tags=71%, list=34%, signal=106%
GO_METHYLATION	GO_METHYLATION	Details ...	191	0.38780132	1.5478677	0.025742574	0.14222918	1.0	3686	tags=50%, list=29%, signal=69%
GO_MICROTUBULE_CYTOSKELETON_ORGANIZATION	GO_MICROTUBULE_CYTOSKELETON_ORGANIZATION	Details ...	252	0.50198984	1.5467552	0.044	0.1429946	1.0	1090	tags=22%, list=9%, signal=23%
GO_RNA_POLYMERASE_II_TRANSCRIPTION_FACTOR_COMPLEX	GO_RNA_POLYMERASE_II_TRANSCRIPTION_FACTOR_COMPLEX	Details ...	91	0.41549885	1.5447781	0.031936128	0.14485247	1.0	2702	tags=35%, list=22%, signal=45%
GO_4_IRON_4_SULFUR_CLUSTER_BINDING	GO_4_IRON_4_SULFUR_CLUSTER_BINDING	Details ...	37	0.5667368	1.5436177	0.039215688	0.14563365	1.0	1050	tags=30%, list=8%, signal=32%
GO_RNA_METHYLTRANSFERASE_ACTIVITY	GO_RNA_METHYLTRANSFERASE_ACTIVITY	Details ...	30	0.5217071	1.5431954	0.091617934	0.14565246	1.0	3096	tags=57%, list=25%, signal=75%
GO_MATURATION_OF_5_8S_RRNA_FROM_TRICISTRONIC_RRNA_TRANSCRIPT_SSU_RRNA_5_8S_RRNA_LSU_RRNA_	GO_MATURATION_OF_5_8S_RRNA_FROM_TRICISTRONIC_RRNA_TRANSCRIPT_SSU_RRNA_5_8S_RRNA_LSU_RRNA_	Details ...	15	0.66775835	1.5427759	0.056092843	0.14561011	1.0	3378	tags=73%, list=27%, signal=100%
GO_ESTROGEN_RECEPTOR_BINDING	GO_ESTROGEN_RECEPTOR_BINDING	Details ...	33	0.43992808	1.5424899	0.032128513	0.14541198	1.0	3997	tags=45%, list=32%, signal=67%
GO_SPLICEOSOMAL_COMPLEX	GO_SPLICEOSOMAL_COMPLEX	Details ...	128	0.48587888	1.5424768	0.099804305	0.14488314	1.0	4447	tags=67%, list=35%, signal=103%
GO_PEPTIDYL_LYSINE_TRIMETHYLATION	GO_PEPTIDYL_LYSINE_TRIMETHYLATION	Details ...	18	0.5737632	1.542266	0.07355865	0.14456028	1.0	2270	tags=39%, list=18%, signal=47%
GO_LYSINE_ACETYLATED_HISTONE_BINDING	GO_LYSINE_ACETYLATED_HISTONE_BINDING	Details ...	15	0.5996527	1.5414549	0.056338027	0.14495528	1.0	3889	tags=60%, list=31%, signal=87%
GO_NUCLEOLAR_PART	GO_NUCLEOLAR_PART	Details ...	49	0.5546762	1.5410324	0.098196395	0.14487542	1.0	2936	tags=47%, list=23%, signal=61%
GO_DNA_PACKAGING_COMPLEX	GO_DNA_PACKAGING_COMPLEX	Details ...	66	0.6060879	1.5407653	0.0655106	0.14464565	1.0	3484	tags=58%, list=28%, signal=79%
GO_CYTOKINESIS	GO_CYTOKINESIS	Details ...	63	0.601259	1.5406872	0.037924152	0.14419714	1.0	955	tags=27%, list=8%, signal=29%
GO_RNA_HELICASE_ACTIVITY	GO_RNA_HELICASE_ACTIVITY	Details ...	49	0.47226733	1.5398457	0.07185629	0.14460824	1.0	3538	tags=51%, list=28%, signal=71%
GO_U4_U6_X_U5_TRI_SNRNP_COMPLEX	GO_U4_U6_X_U5_TRI_SNRNP_COMPLEX	Details ...	18	0.61469394	1.5375994	0.081871346	0.14681081	1.0	3672	tags=72%, list=29%, signal=102%
GO_TRNA_TRANSPORT	GO_TRNA_TRANSPORT	Details ...	31	0.6061985	1.5368551	0.09343936	0.14724071	1.0	3433	tags=65%, list=27%, signal=89%
GO_MATURATION_OF_SSU_RRNA_FROM_TRICISTRONIC_RRNA_TRANSCRIPT_SSU_RRNA_5_8S_RRNA_LSU_RRNA_	GO_MATURATION_OF_SSU_RRNA_FROM_TRICISTRONIC_RRNA_TRANSCRIPT_SSU_RRNA_5_8S_RRNA_LSU_RRNA_	Details ...	29	0.5897343	1.5350517	0.08414873	0.148956	1.0	3917	tags=69%, list=31%, signal=100%
GO_SOMATIC_CELL_DNA_RECOMBINATION	GO_SOMATIC_CELL_DNA_RECOMBINATION	Details ...	30	0.5375591	1.5329456	0.048387095	0.15083055	1.0	1431	tags=33%, list=11%, signal=38%
GO_RIBONUCLEOPROTEIN_COMPLEX_BINDING	GO_RIBONUCLEOPROTEIN_COMPLEX_BINDING	Details ...	73	0.47034538	1.5324198	0.07539683	0.15092573	1.0	2984	tags=45%, list=24%, signal=59%
GO_DNA_REPLICATION_INITIATION	GO_DNA_REPLICATION_INITIATION	Details ...	27	0.81898683	1.5323645	0.03529412	0.1504563	1.0	1423	tags=74%, list=11%, signal=83%
GO_RNA_SPLICING	GO_RNA_SPLICING	Details ...	272	0.43347636	1.5315928	0.10663984	0.1508124	1.0	3781	tags=51%, list=30%, signal=71%
GO_CHROMATIN_REMODELING	GO_CHROMATIN_REMODELING	Details ...	114	0.46372956	1.5312076	0.06175299	0.15074246	1.0	2229	tags=36%, list=18%, signal=43%
GO_CAJAL_BODY	GO_CAJAL_BODY		36	0.50245005	1.5286375	0.076	0.15329602	1.0	3172	tags=58%, list=25%, signal=78%
GO_ERROR_PRONE_TRANSLESION_SYNTHESIS	GO_ERROR_PRONE_TRANSLESION_SYNTHESIS		17	0.7215546	1.5273523	0.039215688	0.154198	1.0	1005	tags=41%, list=8%, signal=45%
GO_CENTROSOME_DUPLICATION	GO_CENTROSOME_DUPLICATION		26	0.5844631	1.525987	0.071570575	0.15528615	1.0	2296	tags=46%, list=18%, signal=56%
GO_OOCYTE_MATURATION	GO_OOCYTE_MATURATION		16	0.6944909	1.5247118	0.043222003	0.15635806	1.0	171	tags=25%, list=1%, signal=25%
GO_REGULATION_OF_MICROTUBULE_BASED_PROCESS	GO_REGULATION_OF_MICROTUBULE_BASED_PROCESS		194	0.5203792	1.5234547	0.05	0.15737632	1.0	1112	tags=26%, list=9%, signal=28%
GO_WALKING_BEHAVIOR	GO_WALKING_BEHAVIOR		28	0.5052191	1.5226114	0.026209677	0.1578566	1.0	2441	tags=36%, list=19%, signal=44%
GO_INO80_TYPE_COMPLEX	GO_INO80_TYPE_COMPLEX		18	0.5641599	1.5224966	0.06958251	0.15744157	1.0	3627	tags=67%, list=29%, signal=94%
GO_HISTONE_H4_ACETYLATION	GO_HISTONE_H4_ACETYLATION		37	0.50166285	1.5220256	0.07098121	0.15748103	1.0	4051	tags=65%, list=32%, signal=96%
GO_HISTONE_KINASE_ACTIVITY	GO_HISTONE_KINASE_ACTIVITY		18	0.7491778	1.5205474	0.031809144	0.1587751	1.0	1431	tags=61%, list=11%, signal=69%
GO_PRESPLICEOSOME	GO_PRESPLICEOSOME		18	0.6248302	1.5205204	0.06719368	0.15825969	1.0	4495	tags=89%, list=36%, signal=138%
GO_CYTOSKELETON_DEPENDENT_CYTOKINESIS	GO_CYTOSKELETON_DEPENDENT_CYTOKINESIS		28	0.72500986	1.5193577	0.026	0.15918212	1.0	1220	tags=43%, list=10%, signal=47%
GO_MITOTIC_CYTOKINESIS	GO_MITOTIC_CYTOKINESIS		23	0.75316215	1.5187132	0.025641026	0.15944184	1.0	955	tags=43%, list=8%, signal=47%
GO_PEPTIDYL_LYSINE_METHYLATION	GO_PEPTIDYL_LYSINE_METHYLATION		52	0.49707642	1.5186387	0.06910569	0.15898582	1.0	2615	tags=44%, list=21%, signal=56%
GO_TRNA_MODIFICATION	GO_TRNA_MODIFICATION		38	0.508924	1.5185946	0.102564104	0.1585052	1.0	4247	tags=71%, list=34%, signal=107%
GO_CHROMOSOME_LOCALIZATION	GO_CHROMOSOME_LOCALIZATION		47	0.6557995	1.5165155	0.058232933	0.16055928	1.0	469	tags=26%, list=4%, signal=26%
GO_MITOTIC_DNA_INTEGRITY_CHECKPOINT	GO_MITOTIC_DNA_INTEGRITY_CHECKPOINT		88	0.5233872	1.5148832	0.04158416	0.16213068	1.0	1663	tags=35%, list=13%, signal=40%
GO_MICROTUBULE_BASED_PROCESS	GO_MICROTUBULE_BASED_PROCESS		371	0.45266843	1.5114748	0.042596348	0.16591682	1.0	1003	tags=17%, list=8%, signal=18%
GO_REGULATION_OF_CYCLIN_DEPENDENT_PROTEIN_KINASE_ACTIVITY	GO_REGULATION_OF_CYCLIN_DEPENDENT_PROTEIN_KINASE_ACTIVITY		75	0.5023338	1.5106373	0.03976143	0.16641204	1.0	1978	tags=33%, list=16%, signal=39%
GO_MRNA_METABOLIC_PROCESS	GO_MRNA_METABOLIC_PROCESS		445	0.3886925	1.50826	0.14173229	0.1689343	1.0	4509	tags=56%, list=36%, signal=85%
GO_POSITIVE_REGULATION_OF_CHROMOSOME_ORGANIZATION	GO_POSITIVE_REGULATION_OF_CHROMOSOME_ORGANIZATION		124	0.42823926	1.5073345	0.043392505	0.16958965	1.0	2230	tags=27%, list=18%, signal=32%
GO_DNA_MODIFICATION	GO_DNA_MODIFICATION		52	0.4172591	1.5073154	0.030927835	0.16904671	1.0	2011	tags=31%, list=16%, signal=37%
GO_NUCLEAR_INNER_MEMBRANE	GO_NUCLEAR_INNER_MEMBRANE		41	0.48658603	1.5070916	0.03629032	0.16876188	1.0	1495	tags=29%, list=12%, signal=33%
GO_TRANSCRIPTION_ELONGATION_FROM_RNA_POLYMERASE_II_PROMOTER	GO_TRANSCRIPTION_ELONGATION_FROM_RNA_POLYMERASE_II_PROMOTER		69	0.4627722	1.5060335	0.10650887	0.16950777	1.0	2832	tags=41%, list=23%, signal=52%
GO_NEGATIVE_REGULATION_OF_CHROMATIN_MODIFICATION	GO_NEGATIVE_REGULATION_OF_CHROMATIN_MODIFICATION		41	0.46725076	1.5044484	0.057943925	0.17100953	1.0	2143	tags=32%, list=17%, signal=38%
GO_EXOSOME_RNASE_COMPLEX_	GO_EXOSOME_RNASE_COMPLEX_		16	0.5306625	1.5044227	0.08414873	0.17047957	1.0	3124	tags=44%, list=25%, signal=58%
GO_RNA_CAPPING	GO_RNA_CAPPING		33	0.52204806	1.5036217	0.10240964	0.17097394	1.0	2918	tags=48%, list=23%, signal=63%
GO_SPLICEOSOMAL_COMPLEX_ASSEMBLY	GO_SPLICEOSOMAL_COMPLEX_ASSEMBLY		41	0.52043474	1.5028225	0.11003861	0.1714254	1.0	3541	tags=59%, list=28%, signal=81%
GO_REGULATION_OF_CELL_CYCLE_PROCESS	GO_REGULATION_OF_CELL_CYCLE_PROCESS		452	0.43561992	1.5020711	0.05263158	0.17174886	1.0	1860	tags=27%, list=15%, signal=30%
GO_HISTONE_METHYLTRANSFERASE_ACTIVITY	GO_HISTONE_METHYLTRANSFERASE_ACTIVITY		41	0.53638136	1.5019412	0.08722109	0.17139634	1.0	2570	tags=49%, list=21%, signal=61%
GO_NUCLEAR_TRANSCRIBED_MRNA_CATABOLIC_PROCESS_EXONUCLEOLYTIC	GO_NUCLEAR_TRANSCRIBED_MRNA_CATABOLIC_PROCESS_EXONUCLEOLYTIC		25	0.5546286	1.5011035	0.08447937	0.17190827	1.0	3124	tags=60%, list=25%, signal=80%
GO_NEGATIVE_REGULATION_OF_MITOTIC_CELL_CYCLE	GO_NEGATIVE_REGULATION_OF_MITOTIC_CELL_CYCLE		173	0.49567288	1.5001246	0.049484536	0.17263468	1.0	1684	tags=32%, list=13%, signal=36%
GO_RIBOSOMAL_LARGE_SUBUNIT_ASSEMBLY	GO_RIBOSOMAL_LARGE_SUBUNIT_ASSEMBLY		19	0.5308617	1.4975495	0.11984283	0.17535956	1.0	3728	tags=47%, list=30%, signal=67%
GO_PROTEIN_HETEROTETRAMERIZATION	GO_PROTEIN_HETEROTETRAMERIZATION		27	0.5729196	1.496207	0.054393306	0.17651063	1.0	2781	tags=52%, list=22%, signal=67%
GO_OOGENESIS	GO_OOGENESIS		41	0.5279254	1.4961613	0.053892214	0.17600633	1.0	241	tags=17%, list=2%, signal=17%
GO_PROTEIN_ALKYLATION	GO_PROTEIN_ALKYLATION		86	0.41703448	1.4931983	0.053465348	0.17925629	1.0	3686	tags=55%, list=29%, signal=77%
GO_REGULATION_OF_ALTERNATIVE_MRNA_SPLICING_VIA_SPLICEOSOME	GO_REGULATION_OF_ALTERNATIVE_MRNA_SPLICING_VIA_SPLICEOSOME		21	0.43690896	1.4920645	0.06395349	0.18026075	1.0	4363	tags=62%, list=35%, signal=95%
GO_NEGATIVE_REGULATION_OF_CELL_CYCLE_PHASE_TRANSITION	GO_NEGATIVE_REGULATION_OF_CELL_CYCLE_PHASE_TRANSITION		127	0.4868933	1.4913146	0.04312115	0.18074931	1.0	1330	tags=28%, list=11%, signal=31%
GO_PROTEIN_UBIQUITINATION_INVOLVED_IN_UBIQUITIN_DEPENDENT_PROTEIN_CATABOLIC_PROCESS	GO_PROTEIN_UBIQUITINATION_INVOLVED_IN_UBIQUITIN_DEPENDENT_PROTEIN_CATABOLIC_PROCESS		101	0.48870584	1.4884782	0.04453441	0.1840943	1.0	697	tags=14%, list=6%, signal=15%
GO_TELOMERE_MAINTENANCE_VIA_TELOMERE_LENGTHENING	GO_TELOMERE_MAINTENANCE_VIA_TELOMERE_LENGTHENING		22	0.5151309	1.4860449	0.1042471	0.18679865	1.0	3183	tags=45%, list=25%, signal=61%
GO_HISTONE_H3_K4_METHYLATION	GO_HISTONE_H3_K4_METHYLATION		21	0.54685885	1.4844112	0.09356725	0.18854228	1.0	4491	tags=71%, list=36%, signal=111%
GO_INTERCELLULAR_BRIDGE	GO_INTERCELLULAR_BRIDGE		32	0.5624946	1.4843745	0.08946322	0.18801779	1.0	2946	tags=53%, list=24%, signal=69%
GO_NEGATIVE_REGULATION_OF_CELL_CYCLE	GO_NEGATIVE_REGULATION_OF_CELL_CYCLE		360	0.41203204	1.48363	0.028397566	0.1883689	1.0	1330	tags=23%, list=11%, signal=25%
GO_SPINDLE_ASSEMBLY	GO_SPINDLE_ASSEMBLY		58	0.6265779	1.4833255	0.05210421	0.18818139	1.0	1186	tags=33%, list=9%, signal=36%
GO_MITOTIC_SPINDLE	GO_MITOTIC_SPINDLE		47	0.6138174	1.482986	0.063872255	0.1880461	1.0	800	tags=32%, list=6%, signal=34%
GO_PROTEIN_MANNOSYLATION	GO_PROTEIN_MANNOSYLATION		16	0.58094954	1.4826063	0.08267716	0.18800725	1.0	4147	tags=63%, list=33%, signal=93%
GO_MULTI_ORGANISM_METABOLIC_PROCESS	GO_MULTI_ORGANISM_METABOLIC_PROCESS		113	0.42747346	1.4822656	0.16798419	0.18795255	1.0	5001	tags=63%, list=40%, signal=104%
GO_ENDORIBONUCLEASE_ACTIVITY	GO_ENDORIBONUCLEASE_ACTIVITY		34	0.4725072	1.4816008	0.061023623	0.18830942	1.0	2631	tags=41%, list=21%, signal=52%
GO_REGULATION_OF_PROTEASOMAL_UBIQUITIN_DEPENDENT_PROTEIN_CATABOLIC_PROCESS	GO_REGULATION_OF_PROTEASOMAL_UBIQUITIN_DEPENDENT_PROTEIN_CATABOLIC_PROCESS		117	0.46028763	1.4814621	0.03777336	0.18794748	1.0	2734	tags=36%, list=22%, signal=45%
GO_MITOTIC_SPINDLE_ORGANIZATION	GO_MITOTIC_SPINDLE_ORGANIZATION		61	0.66487724	1.4789658	0.054108217	0.1907199	1.0	1186	tags=39%, list=9%, signal=43%
GO_TRANSCRIPTION_FACTOR_TFIID_COMPLEX	GO_TRANSCRIPTION_FACTOR_TFIID_COMPLEX		19	0.50067234	1.4758302	0.06346154	0.19449465	1.0	2702	tags=53%, list=22%, signal=67%
GO_U12_TYPE_SPLICEOSOMAL_COMPLEX	GO_U12_TYPE_SPLICEOSOMAL_COMPLEX		20	0.5655109	1.4745404	0.13529412	0.1956399	1.0	4651	tags=75%, list=37%, signal=119%
GO_PROTEIN_DEACETYLASE_ACTIVITY	GO_PROTEIN_DEACETYLASE_ACTIVITY		37	0.40993777	1.4744767	0.06666667	0.19515768	1.0	4580	tags=57%, list=37%, signal=89%
GO_NEGATIVE_REGULATION_OF_PROTEIN_COMPLEX_DISASSEMBLY	GO_NEGATIVE_REGULATION_OF_PROTEIN_COMPLEX_DISASSEMBLY		142	0.5204927	1.4733964	0.06666667	0.19604896	1.0	1072	tags=25%, list=9%, signal=27%
GO_REGULATION_OF_UBIQUITIN_PROTEIN_LIGASE_ACTIVITY	GO_REGULATION_OF_UBIQUITIN_PROTEIN_LIGASE_ACTIVITY		15	0.69595957	1.4732108	0.075581394	0.19573842	1.0	1075	tags=40%, list=9%, signal=44%
GO_SPINDLE_LOCALIZATION	GO_SPINDLE_LOCALIZATION		32	0.5621882	1.473157	0.074	0.19521858	1.0	784	tags=22%, list=6%, signal=23%
GO_HISTONE_LYSINE_N_METHYLTRANSFERASE_ACTIVITY	GO_HISTONE_LYSINE_N_METHYLTRANSFERASE_ACTIVITY		30	0.54947925	1.471552	0.08113591	0.19691923	1.0	2463	tags=50%, list=20%, signal=62%
GO_MITOCHONDRIAL_RNA_METABOLIC_PROCESS	GO_MITOCHONDRIAL_RNA_METABOLIC_PROCESS		17	0.60478216	1.4697945	0.0977131	0.19864039	1.0	3065	tags=53%, list=24%, signal=70%
GO_CHROMATIN	GO_CHROMATIN		349	0.37767586	1.4696736	0.0498008	0.19822314	1.0	3627	tags=47%, list=29%, signal=64%
GO_CYTOSOLIC_RIBOSOME	GO_CYTOSOLIC_RIBOSOME		82	0.41958007	1.4691085	0.14980544	0.19844732	1.0	4748	tags=56%, list=38%, signal=90%
GO_GLUTAMINE_METABOLIC_PROCESS	GO_GLUTAMINE_METABOLIC_PROCESS		21	0.61759794	1.4687059	0.022088353	0.19837923	1.0	1918	tags=52%, list=15%, signal=62%
GO_SUPRAMOLECULAR_FIBER	GO_SUPRAMOLECULAR_FIBER		430	0.37971023	1.4683752	0.022357723	0.19824429	1.0	1512	tags=19%, list=12%, signal=21%
GO_MATURATION_OF_5_8S_RRNA	GO_MATURATION_OF_5_8S_RRNA		24	0.58288366	1.4665532	0.12277228	0.20011826	1.0	3378	tags=54%, list=27%, signal=74%
GO_PROTEIN_MODIFICATION_BY_SMALL_PROTEIN_REMOVAL	GO_PROTEIN_MODIFICATION_BY_SMALL_PROTEIN_REMOVAL		82	0.3949705	1.4642323	0.08928572	0.20268738	1.0	3355	tags=43%, list=27%, signal=58%
GO_TELOMERIC_DNA_BINDING	GO_TELOMERIC_DNA_BINDING		26	0.45533133	1.4636846	0.10763209	0.20287293	1.0	4792	tags=65%, list=38%, signal=106%
GO_ENDONUCLEASE_ACTIVITY_ACTIVE_WITH_EITHER_RIBO_OR_DEOXYRIBONUCLEIC_ACIDS_AND_PRODUCING_5_PHOSPHOMONOESTERS	GO_ENDONUCLEASE_ACTIVITY_ACTIVE_WITH_EITHER_RIBO_OR_DEOXYRIBONUCLEIC_ACIDS_AND_PRODUCING_5_PHOSPHOMONOESTERS		26	0.57549614	1.4633131	0.092929296	0.20278032	1.0	2760	tags=50%, list=22%, signal=64%
GO_NUCLEUS_ORGANIZATION	GO_NUCLEUS_ORGANIZATION		111	0.43650863	1.46308	0.08183633	0.20252189	1.0	2523	tags=32%, list=20%, signal=39%
GO_POSITIVE_REGULATION_OF_MITOTIC_CELL_CYCLE	GO_POSITIVE_REGULATION_OF_MITOTIC_CELL_CYCLE		105	0.4862424	1.4625063	0.06311637	0.20275196	1.0	1075	tags=23%, list=9%, signal=25%
GO_NUCLEOSIDE_MONOPHOSPHATE_BIOSYNTHETIC_PROCESS	GO_NUCLEOSIDE_MONOPHOSPHATE_BIOSYNTHETIC_PROCESS		66	0.421788	1.4623944	0.06849315	0.20231603	1.0	2718	tags=36%, list=22%, signal=46%
GO_REGULATION_OF_LIGASE_ACTIVITY	GO_REGULATION_OF_LIGASE_ACTIVITY		103	0.48580694	1.4622033	0.085365854	0.20203047	1.0	1138	tags=17%, list=9%, signal=18%
GO_NEGATIVE_REGULATION_OF_CELL_CYCLE_G2_M_PHASE_TRANSITION	GO_NEGATIVE_REGULATION_OF_CELL_CYCLE_G2_M_PHASE_TRANSITION		22	0.5506602	1.4616213	0.068136275	0.20226756	1.0	910	tags=23%, list=7%, signal=24%
GO_REGULATION_OF_TELOMERE_MAINTENANCE_VIA_TELOMERE_LENGTHENING	GO_REGULATION_OF_TELOMERE_MAINTENANCE_VIA_TELOMERE_LENGTHENING		42	0.4754037	1.4600201	0.13372093	0.20405823	1.0	4226	tags=57%, list=34%, signal=86%
GO_METAPHASE_PLATE_CONGRESSION	GO_METAPHASE_PLATE_CONGRESSION		34	0.6612806	1.4598765	0.07647059	0.20373403	1.0	779	tags=32%, list=6%, signal=34%
GO_EXONUCLEASE_ACTIVITY_ACTIVE_WITH_EITHER_RIBO_OR_DEOXYRIBONUCLEIC_ACIDS_AND_PRODUCING_5_PHOSPHOMONOESTERS	GO_EXONUCLEASE_ACTIVITY_ACTIVE_WITH_EITHER_RIBO_OR_DEOXYRIBONUCLEIC_ACIDS_AND_PRODUCING_5_PHOSPHOMONOESTERS		33	0.51401114	1.4594316	0.10650887	0.20381142	1.0	3172	tags=55%, list=25%, signal=73%
GO_LIGASE_ACTIVITY_FORMING_CARBON_NITROGEN_BONDS	GO_LIGASE_ACTIVITY_FORMING_CARBON_NITROGEN_BONDS		41	0.53541106	1.4593321	0.054655872	0.20336773	1.0	3426	tags=59%, list=27%, signal=80%
GO_MANNOSYLATION	GO_MANNOSYLATION		23	0.5359874	1.459126	0.08414873	0.20310204	1.0	4147	tags=61%, list=33%, signal=91%
GO_ORGANIC_CATION_TRANSPORT	GO_ORGANIC_CATION_TRANSPORT		17	0.6731502	1.4585693	0.053254437	0.20329122	1.0	1055	tags=29%, list=8%, signal=32%
GO_NEGATIVE_REGULATION_OF_ORGANELLE_ORGANIZATION	GO_NEGATIVE_REGULATION_OF_ORGANELLE_ORGANIZATION		322	0.4324189	1.4580212	0.057259712	0.20346595	1.0	1710	tags=25%, list=14%, signal=28%
GO_NUCLEOCYTOPLASMIC_TRANSPORTER_ACTIVITY	GO_NUCLEOCYTOPLASMIC_TRANSPORTER_ACTIVITY		22	0.5915854	1.4578861	0.12256809	0.20310967	1.0	3339	tags=73%, list=27%, signal=99%
GO_THIOESTER_BIOSYNTHETIC_PROCESS	GO_THIOESTER_BIOSYNTHETIC_PROCESS		37	0.5540378	1.4575077	0.07114624	0.20308138	1.0	1874	tags=41%, list=15%, signal=48%
GO_RNA_PHOSPHODIESTER_BOND_HYDROLYSIS_ENDONUCLEOLYTIC	GO_RNA_PHOSPHODIESTER_BOND_HYDROLYSIS_ENDONUCLEOLYTIC		41	0.4667292	1.4574397	0.08023483	0.20263144	1.0	2746	tags=41%, list=22%, signal=53%
GO_MICROTUBULE_END	GO_MICROTUBULE_END		19	0.6228086	1.4565504	0.07014028	0.20326272	1.0	501	tags=26%, list=4%, signal=27%
GO_REGULATION_OF_CHROMATIN_ORGANIZATION	GO_REGULATION_OF_CHROMATIN_ORGANIZATION		125	0.36525014	1.4561857	0.034883723	0.2032681	1.0	2236	tags=26%, list=18%, signal=32%
GO_NEGATIVE_REGULATION_OF_DNA_REPLICATION	GO_NEGATIVE_REGULATION_OF_DNA_REPLICATION		45	0.5020668	1.4516792	0.083333336	0.20892034	1.0	2868	tags=44%, list=23%, signal=57%
GO_DEACETYLASE_ACTIVITY	GO_DEACETYLASE_ACTIVITY		45	0.39108792	1.4509177	0.07707911	0.20944376	1.0	4580	tags=53%, list=37%, signal=84%
GO_REGULATION_OF_CELL_CYCLE_PHASE_TRANSITION	GO_REGULATION_OF_CELL_CYCLE_PHASE_TRANSITION		263	0.43981597	1.4505873	0.06924643	0.20931791	1.0	1330	tags=22%, list=11%, signal=24%
GO_U2_SNRNP	GO_U2_SNRNP		15	0.60873723	1.4505615	0.13465346	0.20880502	1.0	4651	tags=93%, list=37%, signal=148%
GO_P53_BINDING	GO_P53_BINDING		55	0.39858264	1.4504603	0.088	0.20839638	1.0	4038	tags=51%, list=32%, signal=75%
GO_POSITIVE_REGULATION_OF_LIGASE_ACTIVITY	GO_POSITIVE_REGULATION_OF_LIGASE_ACTIVITY		87	0.51048976	1.4502689	0.08416834	0.20808963	1.0	427	tags=11%, list=3%, signal=12%
GO_REGULATION_OF_CELL_MATURATION	GO_REGULATION_OF_CELL_MATURATION		16	0.55390024	1.4480425	0.06090373	0.21063232	1.0	477	tags=19%, list=4%, signal=19%
GO_CELL_DIVISION_SITE	GO_CELL_DIVISION_SITE		37	0.47941136	1.445603	0.06336634	0.21353203	1.0	1889	tags=30%, list=15%, signal=35%
GO_POSITIVE_REGULATION_OF_MITOTIC_NUCLEAR_DIVISION	GO_POSITIVE_REGULATION_OF_MITOTIC_NUCLEAR_DIVISION		44	0.49771175	1.4449571	0.07722772	0.21393855	1.0	427	tags=18%, list=3%, signal=19%
GO_NEGATIVE_REGULATION_OF_CYTOSKELETON_ORGANIZATION	GO_NEGATIVE_REGULATION_OF_CYTOSKELETON_ORGANIZATION		185	0.47516638	1.4436402	0.07302231	0.21521915	1.0	1112	tags=23%, list=9%, signal=25%
GO_REGULATION_OF_MITOTIC_CELL_CYCLE	GO_REGULATION_OF_MITOTIC_CELL_CYCLE		391	0.42910978	1.4432158	0.07739308	0.21523291	1.0	1605	tags=24%, list=13%, signal=26%
GO_TRANSFERASE_COMPLEX_TRANSFERRING_PHOSPHORUS_CONTAINING_GROUPS	GO_TRANSFERASE_COMPLEX_TRANSFERRING_PHOSPHORUS_CONTAINING_GROUPS		195	0.35806662	1.4431251	0.033464566	0.21482311	1.0	2832	tags=34%, list=23%, signal=44%
GO_REGULATION_OF_PROTEIN_COMPLEX_DISASSEMBLY	GO_REGULATION_OF_PROTEIN_COMPLEX_DISASSEMBLY		178	0.48361716	1.4425308	0.068136275	0.21503437	1.0	1075	tags=22%, list=9%, signal=24%
GO_TRANSFERASE_ACTIVITY_TRANSFERRING_ACYL_GROUPS_OTHER_THAN_AMINO_ACYL_GROUPS	GO_TRANSFERASE_ACTIVITY_TRANSFERRING_ACYL_GROUPS_OTHER_THAN_AMINO_ACYL_GROUPS		136	0.38526496	1.4413341	0.04696673	0.21619256	1.0	2868	tags=38%, list=23%, signal=48%
GO_NEGATIVE_REGULATION_OF_HISTONE_MODIFICATION	GO_NEGATIVE_REGULATION_OF_HISTONE_MODIFICATION		33	0.45840135	1.4413109	0.092156865	0.21565019	1.0	2143	tags=30%, list=17%, signal=36%
GO_POSITIVE_REGULATION_OF_NUCLEAR_DIVISION	GO_POSITIVE_REGULATION_OF_NUCLEAR_DIVISION		54	0.47019285	1.4392625	0.07312253	0.21801032	1.0	427	tags=17%, list=3%, signal=17%
GO_REGULATION_OF_MICROTUBULE_POLYMERIZATION_OR_DEPOLYMERIZATION	GO_REGULATION_OF_MICROTUBULE_POLYMERIZATION_OR_DEPOLYMERIZATION		146	0.5262771	1.4370984	0.090361446	0.22057089	1.0	1075	tags=27%, list=9%, signal=29%
GO_ATPASE_ACTIVITY_COUPLED	GO_ATPASE_ACTIVITY_COUPLED		251	0.34254143	1.4369774	0.03187251	0.22015102	1.0	2368	tags=27%, list=19%, signal=33%
GO_NUCLEAR_PORE	GO_NUCLEAR_PORE		67	0.4904606	1.4350674	0.1328125	0.22224024	1.0	3166	tags=48%, list=25%, signal=64%
GO_MICROTUBULE_BINDING	GO_MICROTUBULE_BINDING		153	0.45222318	1.4341828	0.066	0.22301903	1.0	805	tags=17%, list=6%, signal=18%
GO_EXPLORATION_BEHAVIOR	GO_EXPLORATION_BEHAVIOR		19	0.52459204	1.4334809	0.06990291	0.22345774	1.0	2967	tags=37%, list=24%, signal=48%
GO_POSITIVE_REGULATION_OF_CELL_CYCLE_PROCESS	GO_POSITIVE_REGULATION_OF_CELL_CYCLE_PROCESS		202	0.44044352	1.4302115	0.07392996	0.22775628	1.0	1331	tags=23%, list=11%, signal=26%
GO_NUCLEAR_TRANSCRIBED_MRNA_CATABOLIC_PROCESS_DEADENYLATION_DEPENDENT_DECAY	GO_NUCLEAR_TRANSCRIBED_MRNA_CATABOLIC_PROCESS_DEADENYLATION_DEPENDENT_DECAY		44	0.44170213	1.4292103	0.119760476	0.2287111	1.0	3215	tags=48%, list=26%, signal=64%
GO_REGULATION_OF_PROTEASOMAL_PROTEIN_CATABOLIC_PROCESS	GO_REGULATION_OF_PROTEASOMAL_PROTEIN_CATABOLIC_PROCESS		146	0.41745973	1.4277879	0.052738335	0.23034343	1.0	2734	tags=31%, list=22%, signal=39%
GO_SNRNA_METABOLIC_PROCESS	GO_SNRNA_METABOLIC_PROCESS		63	0.42937368	1.4260759	0.1369863	0.23245426	1.0	3746	tags=46%, list=30%, signal=65%
GO_RIBOSOME_BINDING	GO_RIBOSOME_BINDING		34	0.4725143	1.4258406	0.09677419	0.23222664	1.0	2858	tags=47%, list=23%, signal=61%
GO_MITOTIC_SPINDLE_ASSEMBLY	GO_MITOTIC_SPINDLE_ASSEMBLY		36	0.63332695	1.4252454	0.07878788	0.23258321	1.0	1186	tags=36%, list=9%, signal=40%
GO_NUCLEOBASE_CONTAINING_COMPOUND_TRANSPORT	GO_NUCLEOBASE_CONTAINING_COMPOUND_TRANSPORT		153	0.3886041	1.4211708	0.10546875	0.23809965	1.0	4135	tags=56%, list=33%, signal=83%
GO_NUCLEAR_LOCALIZATION_SEQUENCE_BINDING	GO_NUCLEAR_LOCALIZATION_SEQUENCE_BINDING		20	0.5173996	1.4205039	0.1553398	0.2384591	1.0	2831	tags=50%, list=23%, signal=64%
GO_REGULATION_OF_PROTEIN_UBIQUITINATION_INVOLVED_IN_UBIQUITIN_DEPENDENT_PROTEIN_CATABOLIC_PROCESS	GO_REGULATION_OF_PROTEIN_UBIQUITINATION_INVOLVED_IN_UBIQUITIN_DEPENDENT_PROTEIN_CATABOLIC_PROCESS		88	0.48483777	1.4202167	0.10728745	0.2382631	1.0	1141	tags=15%, list=9%, signal=16%
GO_RNA_SECONDARY_STRUCTURE_UNWINDING	GO_RNA_SECONDARY_STRUCTURE_UNWINDING		29	0.4583406	1.4172202	0.111328125	0.2422964	1.0	3538	tags=52%, list=28%, signal=72%
GO_FEMALE_MEIOTIC_DIVISION	GO_FEMALE_MEIOTIC_DIVISION		18	0.60380006	1.4079623	0.097165994	0.25610623	1.0	427	tags=28%, list=3%, signal=29%
GO_NEGATIVE_REGULATION_OF_TRANSLATIONAL_INITIATION	GO_NEGATIVE_REGULATION_OF_TRANSLATIONAL_INITIATION		15	0.5375192	1.4068992	0.09142857	0.2571834	1.0	1741	tags=40%, list=14%, signal=46%
GO_ERROR_FREE_TRANSLESION_SYNTHESIS	GO_ERROR_FREE_TRANSLESION_SYNTHESIS		18	0.5977431	1.4064364	0.13267326	0.25729138	1.0	1877	tags=39%, list=15%, signal=46%
GO_HISTONE_H3_ACETYLATION	GO_HISTONE_H3_ACETYLATION		34	0.46573997	1.4046837	0.1002045	0.259405	1.0	2754	tags=35%, list=22%, signal=45%
GO_CYTOPLASMIC_MICROTUBULE	GO_CYTOPLASMIC_MICROTUBULE		48	0.40318194	1.4033109	0.04809619	0.26104647	1.0	271	tags=15%, list=2%, signal=15%
GO_RIBOSOME_ASSEMBLY	GO_RIBOSOME_ASSEMBLY		41	0.4674112	1.4016016	0.19361277	0.26313645	1.0	3911	tags=46%, list=31%, signal=67%
GO_U2_TYPE_SPLICEOSOMAL_COMPLEX	GO_U2_TYPE_SPLICEOSOMAL_COMPLEX		24	0.51386356	1.3998187	0.17829457	0.2654322	1.0	4615	tags=75%, list=37%, signal=119%
GO_PROTEIN_K48_LINKED_DEUBIQUITINATION	GO_PROTEIN_K48_LINKED_DEUBIQUITINATION		15	0.5128053	1.3991191	0.11	0.26590675	1.0	3098	tags=53%, list=25%, signal=71%
GO_ORGANELLE_ASSEMBLY	GO_ORGANELLE_ASSEMBLY		352	0.33955175	1.3989528	0.064579256	0.26552173	1.0	2242	tags=23%, list=18%, signal=27%
GO_REGULATION_OF_APPETITE	GO_REGULATION_OF_APPETITE		20	0.48523802	1.3970561	0.102970295	0.26797104	1.0	925	tags=15%, list=7%, signal=16%
GO_CILIARY_TRANSITION_ZONE	GO_CILIARY_TRANSITION_ZONE		17	0.53202164	1.3951252	0.14056225	0.2704696	1.0	4024	tags=53%, list=32%, signal=78%
GO_PCG_PROTEIN_COMPLEX	GO_PCG_PROTEIN_COMPLEX		37	0.52646416	1.3949316	0.14604463	0.27015713	1.0	3686	tags=59%, list=29%, signal=84%
GO_SYNAPSIS	GO_SYNAPSIS		21	0.497987	1.393427	0.07926829	0.2719777	1.0	905	tags=19%, list=7%, signal=20%
GO_SEX_CHROMOSOME	GO_SEX_CHROMOSOME		23	0.518431	1.392478	0.17181467	0.27288514	1.0	3230	tags=48%, list=26%, signal=64%
GO_PEPTIDYL_ARGININE_MODIFICATION	GO_PEPTIDYL_ARGININE_MODIFICATION		16	0.4452088	1.3908237	0.1403162	0.27497897	1.0	3536	tags=44%, list=28%, signal=61%
GO_SPINDLE_MIDZONE	GO_SPINDLE_MIDZONE		22	0.7096729	1.3905025	0.07984032	0.27483335	1.0	516	tags=50%, list=4%, signal=52%
GO_REGULATION_OF_DNA_TEMPLATED_TRANSCRIPTION_ELONGATION	GO_REGULATION_OF_DNA_TEMPLATED_TRANSCRIPTION_ELONGATION		33	0.43919125	1.3893554	0.12280702	0.27607846	1.0	3211	tags=48%, list=26%, signal=65%
GO_REGULATION_OF_TRANSCRIPTION_FROM_RNA_POLYMERASE_I_PROMOTER	GO_REGULATION_OF_TRANSCRIPTION_FROM_RNA_POLYMERASE_I_PROMOTER		21	0.4523094	1.3870282	0.12450593	0.27925327	1.0	2135	tags=38%, list=17%, signal=46%
GO_NEGATIVE_REGULATION_OF_CELL_CYCLE_ARREST	GO_NEGATIVE_REGULATION_OF_CELL_CYCLE_ARREST		17	0.5002321	1.3863065	0.074074075	0.2797545	1.0	1459	tags=41%, list=12%, signal=47%
GO_ENDORIBONUCLEASE_ACTIVITY_PRODUCING_5_PHOSPHOMONOESTERS	GO_ENDORIBONUCLEASE_ACTIVITY_PRODUCING_5_PHOSPHOMONOESTERS		22	0.55729795	1.3861566	0.14285715	0.27935368	1.0	2159	tags=41%, list=17%, signal=49%
GO_KETONE_BIOSYNTHETIC_PROCESS	GO_KETONE_BIOSYNTHETIC_PROCESS		23	0.48417485	1.3850465	0.11821705	0.28048402	1.0	3191	tags=52%, list=25%, signal=70%
GO_PROTEIN_K11_LINKED_UBIQUITINATION	GO_PROTEIN_K11_LINKED_UBIQUITINATION		20	0.5047384	1.3847303	0.12974052	0.28034374	1.0	1138	tags=20%, list=9%, signal=22%
GO_TRANSFERASE_ACTIVITY_TRANSFERRING_ACYL_GROUPS	GO_TRANSFERASE_ACTIVITY_TRANSFERRING_ACYL_GROUPS		160	0.36626554	1.384728	0.053045187	0.279672	1.0	2868	tags=38%, list=23%, signal=48%
GO_ANTIGEN_PROCESSING_AND_PRESENTATION_OF_PEPTIDE_OR_POLYSACCHARIDE_ANTIGEN_VIA_MHC_CLASS_II	GO_ANTIGEN_PROCESSING_AND_PRESENTATION_OF_PEPTIDE_OR_POLYSACCHARIDE_ANTIGEN_VIA_MHC_CLASS_II		76	0.50841504	1.3837055	0.09710744	0.28072616	1.0	222	tags=12%, list=2%, signal=12%
GO_TRANSLATION_REGULATOR_ACTIVITY	GO_TRANSLATION_REGULATOR_ACTIVITY		23	0.5032085	1.3821607	0.109433964	0.28263575	1.0	637	tags=17%, list=5%, signal=18%
GO_TRNA_METHYLTRANSFERASE_ACTIVITY	GO_TRNA_METHYLTRANSFERASE_ACTIVITY		15	0.50644964	1.3819705	0.12573674	0.28232458	1.0	3096	tags=60%, list=25%, signal=80%
GO_HISTONE_METHYLATION	GO_HISTONE_METHYLATION		63	0.42825803	1.3819222	0.15841584	0.2817555	1.0	3686	tags=52%, list=29%, signal=74%
GO_RIBOSOME	GO_RIBOSOME		155	0.37260744	1.3818196	0.19038461	0.28124693	1.0	4748	tags=54%, list=38%, signal=85%
GO_TRANSCRIPTION_FROM_RNA_POLYMERASE_III_PROMOTER	GO_TRANSCRIPTION_FROM_RNA_POLYMERASE_III_PROMOTER		32	0.44196928	1.3806924	0.16535433	0.28247026	1.0	2801	tags=47%, list=22%, signal=60%
GO_REGULATION_OF_DNA_RECOMBINATION	GO_REGULATION_OF_DNA_RECOMBINATION		46	0.45396096	1.3789787	0.11546392	0.2847671	1.0	2401	tags=39%, list=19%, signal=48%
GO_DSRNA_FRAGMENTATION	GO_DSRNA_FRAGMENTATION		16	0.52234936	1.3779047	0.11977186	0.28588188	1.0	4077	tags=69%, list=33%, signal=102%
GO_TRANSLATION_INITIATION_FACTOR_BINDING	GO_TRANSLATION_INITIATION_FACTOR_BINDING		23	0.45396113	1.3769437	0.171875	0.2868275	1.0	3939	tags=52%, list=31%, signal=76%
GO_RNA_PHOSPHODIESTER_BOND_HYDROLYSIS	GO_RNA_PHOSPHODIESTER_BOND_HYDROLYSIS		82	0.3893143	1.3751415	0.102713175	0.28903374	1.0	3260	tags=43%, list=26%, signal=57%
GO_TRANSCRIPTION_FROM_RNA_POLYMERASE_I_PROMOTER	GO_TRANSCRIPTION_FROM_RNA_POLYMERASE_I_PROMOTER		32	0.49807954	1.3745978	0.13305613	0.28928056	1.0	2481	tags=47%, list=20%, signal=58%
GO_REGULATION_OF_CELL_CYCLE_G2_M_PHASE_TRANSITION	GO_REGULATION_OF_CELL_CYCLE_G2_M_PHASE_TRANSITION		49	0.50360924	1.3741672	0.10891089	0.28936428	1.0	1522	tags=33%, list=12%, signal=37%
GO_NEGATIVE_REGULATION_OF_GENE_SILENCING	GO_NEGATIVE_REGULATION_OF_GENE_SILENCING		15	0.49526516	1.3727564	0.125	0.2911019	1.0	2135	tags=27%, list=17%, signal=32%
GO_METENCEPHALON_DEVELOPMENT	GO_METENCEPHALON_DEVELOPMENT		90	0.34506798	1.3726487	0.049309663	0.29056168	1.0	2154	tags=20%, list=17%, signal=24%
GO_POSITIVE_REGULATION_OF_CELL_CYCLE	GO_POSITIVE_REGULATION_OF_CELL_CYCLE		276	0.38857523	1.3723415	0.084812626	0.29041064	1.0	1090	tags=18%, list=9%, signal=19%
GO_MODULATION_BY_VIRUS_OF_HOST_MORPHOLOGY_OR_PHYSIOLOGY	GO_MODULATION_BY_VIRUS_OF_HOST_MORPHOLOGY_OR_PHYSIOLOGY		34	0.37345603	1.3697749	0.06944445	0.2939793	1.0	852	tags=12%, list=7%, signal=13%
GO_PIGMENT_METABOLIC_PROCESS	GO_PIGMENT_METABOLIC_PROCESS		51	0.41640285	1.369467	0.07926829	0.29379514	1.0	2437	tags=37%, list=19%, signal=46%
GO_HISTONE_DEMETHYLASE_ACTIVITY	GO_HISTONE_DEMETHYLASE_ACTIVITY		22	0.46399665	1.3681245	0.14423077	0.29536802	1.0	3854	tags=41%, list=31%, signal=59%
GO_STRUCTURAL_CONSTITUENT_OF_RIBOSOME	GO_STRUCTURAL_CONSTITUENT_OF_RIBOSOME		144	0.35252774	1.3679589	0.15913557	0.29498875	1.0	4665	tags=53%, list=37%, signal=83%
GO_MULTICELLULAR_ORGANISM_GROWTH	GO_MULTICELLULAR_ORGANISM_GROWTH		65	0.38438964	1.3646677	0.05785124	0.29994568	1.0	1680	tags=23%, list=13%, signal=27%
GO_REGULATION_OF_TRANSCRIPTION_ELONGATION_FROM_RNA_POLYMERASE_II_PROMOTER	GO_REGULATION_OF_TRANSCRIPTION_ELONGATION_FROM_RNA_POLYMERASE_II_PROMOTER		19	0.4936203	1.3643502	0.13926499	0.29981866	1.0	2770	tags=42%, list=22%, signal=54%
GO_POSITIVE_REGULATION_OF_TELOMERE_MAINTENANCE_VIA_TELOMERE_LENGTHENING	GO_POSITIVE_REGULATION_OF_TELOMERE_MAINTENANCE_VIA_TELOMERE_LENGTHENING		28	0.49669287	1.3637042	0.16831683	0.30022395	1.0	3469	tags=46%, list=28%, signal=64%
GO_RAN_GTPASE_BINDING	GO_RAN_GTPASE_BINDING		26	0.52640045	1.3633919	0.19132149	0.3000973	1.0	3729	tags=62%, list=30%, signal=87%
GO_LIGASE_ACTIVITY	GO_LIGASE_ACTIVITY		272	0.35970852	1.3628372	0.06639839	0.3003696	1.0	3532	tags=41%, list=28%, signal=56%
GO_POSITIVE_REGULATION_OF_CALCIUM_ION_DEPENDENT_EXOCYTOSIS	GO_POSITIVE_REGULATION_OF_CALCIUM_ION_DEPENDENT_EXOCYTOSIS		16	0.57192886	1.3625549	0.12989691	0.30018815	1.0	1556	tags=25%, list=12%, signal=29%
GO_MULTICELLULAR_ORGANISMAL_MOVEMENT	GO_MULTICELLULAR_ORGANISMAL_MOVEMENT		35	0.4373422	1.3624289	0.07649254	0.2997178	1.0	2751	tags=26%, list=22%, signal=33%
GO_CHROMATIN_BINDING	GO_CHROMATIN_BINDING		360	0.32515442	1.3614944	0.07647059	0.300579	1.0	2463	tags=28%, list=20%, signal=34%
GO_PIGMENT_GRANULE_ORGANIZATION	GO_PIGMENT_GRANULE_ORGANIZATION		15	0.5386948	1.3611964	0.11089494	0.3003306	1.0	645	tags=13%, list=5%, signal=14%
GO_POSITIVE_REGULATION_OF_DNA_TEMPLATED_TRANSCRIPTION_ELONGATION	GO_POSITIVE_REGULATION_OF_DNA_TEMPLATED_TRANSCRIPTION_ELONGATION		20	0.5100579	1.3595145	0.17254902	0.3025109	1.0	3211	tags=55%, list=26%, signal=74%
GO_MRNA_BINDING	GO_MRNA_BINDING		117	0.34942606	1.3592877	0.14619882	0.3022185	1.0	3823	tags=43%, list=31%, signal=61%
GO_REGULATION_OF_CHROMATIN_SILENCING	GO_REGULATION_OF_CHROMATIN_SILENCING		15	0.6065358	1.3588353	0.12877263	0.30234513	1.0	2438	tags=47%, list=19%, signal=58%
GO_CULLIN_RING_UBIQUITIN_LIGASE_COMPLEX	GO_CULLIN_RING_UBIQUITIN_LIGASE_COMPLEX		93	0.3853061	1.3585112	0.09619238	0.30222818	1.0	1667	tags=22%, list=13%, signal=25%
GO_CLATHRIN_ADAPTOR_COMPLEX	GO_CLATHRIN_ADAPTOR_COMPLEX		22	0.4109284	1.3574592	0.12889813	0.30330226	1.0	4488	tags=50%, list=36%, signal=78%
GO_POSITIVE_REGULATION_OF_RESPONSE_TO_DNA_DAMAGE_STIMULUS	GO_POSITIVE_REGULATION_OF_RESPONSE_TO_DNA_DAMAGE_STIMULUS		51	0.41215056	1.3571976	0.118	0.30306596	1.0	3184	tags=45%, list=25%, signal=60%
GO_REGULATION_OF_HISTONE_METHYLATION	GO_REGULATION_OF_HISTONE_METHYLATION		43	0.3997988	1.357067	0.14396887	0.30258742	1.0	2230	tags=23%, list=18%, signal=28%
GO_V_D_J_RECOMBINATION	GO_V_D_J_RECOMBINATION		16	0.5391046	1.3567396	0.125	0.30251956	1.0	1431	tags=31%, list=11%, signal=35%
GO_PROTEIN_DEALKYLATION	GO_PROTEIN_DEALKYLATION		25	0.42378753	1.3563699	0.14615385	0.3024674	1.0	3950	tags=44%, list=32%, signal=64%
GO_POSITIVE_REGULATION_OF_CHROMATIN_MODIFICATION	GO_POSITIVE_REGULATION_OF_CHROMATIN_MODIFICATION		73	0.37038845	1.3523983	0.07421875	0.3086192	1.0	2230	tags=27%, list=18%, signal=33%
GO_EXECUTION_PHASE_OF_APOPTOSIS	GO_EXECUTION_PHASE_OF_APOPTOSIS		49	0.36254612	1.3510437	0.07214429	0.3103256	1.0	2141	tags=29%, list=17%, signal=34%
GO_SNRNA_PROCESSING	GO_SNRNA_PROCESSING		15	0.5240375	1.3506092	0.18554688	0.31039894	1.0	3718	tags=47%, list=30%, signal=66%
GO_DNA_METHYLATION_OR_DEMETHYLATION	GO_DNA_METHYLATION_OR_DEMETHYLATION		38	0.40100276	1.3488215	0.09205021	0.31285685	1.0	1940	tags=29%, list=15%, signal=34%
GO_METALLO_SULFUR_CLUSTER_ASSEMBLY	GO_METALLO_SULFUR_CLUSTER_ASSEMBLY		15	0.5054287	1.346539	0.18934911	0.31610626	1.0	4686	tags=67%, list=37%, signal=106%
GO_PEROXISOME_ORGANIZATION	GO_PEROXISOME_ORGANIZATION		29	0.4603379	1.3455042	0.14951456	0.31726053	1.0	3690	tags=48%, list=29%, signal=68%
GO_MULTI_ORGANISM_LOCALIZATION	GO_MULTI_ORGANISM_LOCALIZATION		59	0.419293	1.3446678	0.13445379	0.3179932	1.0	2431	tags=41%, list=19%, signal=50%
GO_DNA_DOUBLE_STRAND_BREAK_PROCESSING	GO_DNA_DOUBLE_STRAND_BREAK_PROCESSING		16	0.6060349	1.3437644	0.1610338	0.3188978	1.0	1975	tags=56%, list=16%, signal=67%
GO_CENTROSOME_LOCALIZATION	GO_CENTROSOME_LOCALIZATION		16	0.54856914	1.3429562	0.14689265	0.31968635	1.0	466	tags=19%, list=4%, signal=19%
GO_LIGAND_DEPENDENT_NUCLEAR_RECEPTOR_TRANSCRIPTION_COACTIVATOR_ACTIVITY	GO_LIGAND_DEPENDENT_NUCLEAR_RECEPTOR_TRANSCRIPTION_COACTIVATOR_ACTIVITY		40	0.42091766	1.3424402	0.12096774	0.31985408	1.0	3398	tags=52%, list=27%, signal=72%
GO_SIGNAL_TRANSDUCTION_IN_RESPONSE_TO_DNA_DAMAGE	GO_SIGNAL_TRANSDUCTION_IN_RESPONSE_TO_DNA_DAMAGE		86	0.43969038	1.3420464	0.1325536	0.3198766	1.0	1330	tags=24%, list=11%, signal=27%
GO_ORGANELLE_LOCALIZATION	GO_ORGANELLE_LOCALIZATION		318	0.3386707	1.3409649	0.06841046	0.32107455	1.0	2361	tags=25%, list=19%, signal=30%
GO_QUATERNARY_AMMONIUM_GROUP_TRANSPORT	GO_QUATERNARY_AMMONIUM_GROUP_TRANSPORT		15	0.624915	1.3408263	0.1257485	0.32064408	1.0	1666	tags=53%, list=13%, signal=61%
GO_GLOBAL_GENOME_NUCLEOTIDE_EXCISION_REPAIR	GO_GLOBAL_GENOME_NUCLEOTIDE_EXCISION_REPAIR		29	0.4451636	1.3406398	0.19483101	0.32026824	1.0	2793	tags=38%, list=22%, signal=49%
GO_DNA_ALKYLATION	GO_DNA_ALKYLATION		29	0.4384189	1.3406205	0.09465021	0.31962153	1.0	1940	tags=34%, list=15%, signal=41%
GO_REGULATION_OF_CELL_CYCLE_CHECKPOINT	GO_REGULATION_OF_CELL_CYCLE_CHECKPOINT		23	0.56766033	1.3393064	0.12426036	0.32115588	1.0	3441	tags=70%, list=27%, signal=96%
GO_MITOCHONDRIAL_TRANSMEMBRANE_TRANSPORT	GO_MITOCHONDRIAL_TRANSMEMBRANE_TRANSPORT		43	0.42228898	1.3338714	0.18110237	0.32997206	1.0	4122	tags=60%, list=33%, signal=90%
GO_PURINE_NUCLEOSIDE_BIOSYNTHETIC_PROCESS	GO_PURINE_NUCLEOSIDE_BIOSYNTHETIC_PROCESS		69	0.36278337	1.332296	0.103792414	0.3320571	1.0	3213	tags=33%, list=26%, signal=45%
GO_POSITIVE_REGULATION_OF_CELL_DIVISION	GO_POSITIVE_REGULATION_OF_CELL_DIVISION		111	0.4170928	1.3294502	0.10909091	0.3364809	1.0	767	tags=17%, list=6%, signal=18%
GO_EXCRETION	GO_EXCRETION		40	0.46984076	1.3293978	0.10891089	0.33584774	1.0	1614	tags=25%, list=13%, signal=29%
GO_SOMATIC_RECOMBINATION_OF_IMMUNOGLOBULIN_GENE_SEGMENTS	GO_SOMATIC_RECOMBINATION_OF_IMMUNOGLOBULIN_GENE_SEGMENTS		18	0.51182014	1.3268576	0.18039216	0.33978003	1.0	2077	tags=33%, list=17%, signal=40%
GO_PROTEIN_SERINE_THREONINE_TYROSINE_KINASE_ACTIVITY	GO_PROTEIN_SERINE_THREONINE_TYROSINE_KINASE_ACTIVITY		37	0.44798088	1.3265896	0.11729623	0.33950585	1.0	1030	tags=22%, list=8%, signal=23%
GO_ESTABLISHMENT_OF_SPINDLE_ORIENTATION	GO_ESTABLISHMENT_OF_SPINDLE_ORIENTATION		23	0.47928777	1.3258443	0.14658634	0.34010231	1.0	784	tags=17%, list=6%, signal=19%
GO_PROTEIN_TRANSMEMBRANE_TRANSPORT	GO_PROTEIN_TRANSMEMBRANE_TRANSPORT		39	0.42310047	1.325171	0.17110266	0.34065914	1.0	4067	tags=56%, list=32%, signal=83%
GO_ALPHA_AMINO_ACID_BIOSYNTHETIC_PROCESS	GO_ALPHA_AMINO_ACID_BIOSYNTHETIC_PROCESS		63	0.51858425	1.3244824	0.114519425	0.34123337	1.0	1013	tags=25%, list=8%, signal=27%
GO_NUCLEAR_PERIPHERY	GO_NUCLEAR_PERIPHERY		101	0.40005782	1.3243396	0.14314516	0.3407842	1.0	3038	tags=47%, list=24%, signal=61%
GO_MITOCHONDRIAL_GENOME_MAINTENANCE	GO_MITOCHONDRIAL_GENOME_MAINTENANCE		17	0.49577287	1.3239349	0.15895373	0.34077108	1.0	1566	tags=41%, list=12%, signal=47%
GO_POSITIVE_REGULATION_OF_TELOMERE_MAINTENANCE	GO_POSITIVE_REGULATION_OF_TELOMERE_MAINTENANCE		36	0.45147955	1.320638	0.19438878	0.34607774	1.0	3469	tags=42%, list=28%, signal=57%
GO_HETEROCHROMATIN	GO_HETEROCHROMATIN		52	0.40038556	1.315217	0.16232465	0.35512617	1.0	3889	tags=54%, list=31%, signal=78%
GO_TRANSITION_METAL_ION_TRANSMEMBRANE_TRANSPORTER_ACTIVITY	GO_TRANSITION_METAL_ION_TRANSMEMBRANE_TRANSPORTER_ACTIVITY		27	0.43566915	1.3151855	0.09780439	0.35444465	1.0	649	tags=11%, list=5%, signal=12%
GO_CELLULAR_AMINO_ACID_BIOSYNTHETIC_PROCESS	GO_CELLULAR_AMINO_ACID_BIOSYNTHETIC_PROCESS		76	0.50832886	1.3141844	0.11717172	0.35555124	1.0	1013	tags=24%, list=8%, signal=26%
GO_ESTABLISHMENT_OF_MITOTIC_SPINDLE_LOCALIZATION	GO_ESTABLISHMENT_OF_MITOTIC_SPINDLE_LOCALIZATION		21	0.52388185	1.3136082	0.16666667	0.355904	1.0	466	tags=19%, list=4%, signal=20%
GO_3_5_EXONUCLEASE_ACTIVITY	GO_3_5_EXONUCLEASE_ACTIVITY		34	0.4293605	1.3135563	0.17913386	0.35528132	1.0	3502	tags=50%, list=28%, signal=69%
GO_NUCLEOSIDE_TRIPHOSPHATE_BIOSYNTHETIC_PROCESS	GO_NUCLEOSIDE_TRIPHOSPHATE_BIOSYNTHETIC_PROCESS		45	0.38255715	1.3132371	0.15811089	0.35511947	1.0	2718	tags=29%, list=22%, signal=37%
GO_REGULATION_OF_TELOMERE_CAPPING	GO_REGULATION_OF_TELOMERE_CAPPING		19	0.49836382	1.3132318	0.20309478	0.35439804	1.0	907	tags=16%, list=7%, signal=17%
GO_METAL_CLUSTER_BINDING	GO_METAL_CLUSTER_BINDING		54	0.4589884	1.3131415	0.16570328	0.35382757	1.0	1050	tags=22%, list=8%, signal=24%
GO_PROTEIN_TETRAMERIZATION	GO_PROTEIN_TETRAMERIZATION		110	0.40123275	1.311536	0.06776181	0.35608947	1.0	2781	tags=43%, list=22%, signal=54%
GO_MICROBODY_MEMBRANE	GO_MICROBODY_MEMBRANE		47	0.45153567	1.3098111	0.15487571	0.35851714	1.0	3690	tags=53%, list=29%, signal=75%
GO_METHYLATED_HISTONE_BINDING	GO_METHYLATED_HISTONE_BINDING		39	0.40239483	1.309377	0.19675456	0.3585774	1.0	2754	tags=33%, list=22%, signal=43%
GO_AMINO_ACID_ACTIVATION	GO_AMINO_ACID_ACTIVATION		39	0.4702831	1.3093318	0.2264529	0.35793647	1.0	3519	tags=54%, list=28%, signal=75%
GO_VITAMIN_D_RECEPTOR_BINDING	GO_VITAMIN_D_RECEPTOR_BINDING		16	0.45037383	1.3089406	0.17248061	0.35786736	1.0	3628	tags=50%, list=29%, signal=70%
GO_POSITIVE_REGULATION_OF_HISTONE_METHYLATION	GO_POSITIVE_REGULATION_OF_HISTONE_METHYLATION		26	0.45027503	1.3088888	0.16374269	0.35723588	1.0	2230	tags=23%, list=18%, signal=28%
GO_MITOCHONDRIAL_TRANSLATION	GO_MITOCHONDRIAL_TRANSLATION		68	0.46907198	1.3088121	0.234375	0.3566552	1.0	4239	tags=54%, list=34%, signal=82%
GO_MANNOSYLTRANSFERASE_ACTIVITY	GO_MANNOSYLTRANSFERASE_ACTIVITY		18	0.49333394	1.3085873	0.19649805	0.3563647	1.0	4147	tags=56%, list=33%, signal=83%
GO_RRNA_BINDING	GO_RRNA_BINDING		44	0.3880597	1.3084358	0.18089432	0.35593095	1.0	4748	tags=57%, list=38%, signal=91%
GO_N_TERMINAL_PROTEIN_AMINO_ACID_MODIFICATION	GO_N_TERMINAL_PROTEIN_AMINO_ACID_MODIFICATION		18	0.48124865	1.3083545	0.18837675	0.3553667	1.0	2054	tags=33%, list=16%, signal=40%
GO_SWI_SNF_SUPERFAMILY_TYPE_COMPLEX	GO_SWI_SNF_SUPERFAMILY_TYPE_COMPLEX		62	0.38240018	1.3083361	0.16798419	0.3546951	1.0	3627	tags=52%, list=29%, signal=72%
GO_GALACTOSYLTRANSFERASE_ACTIVITY	GO_GALACTOSYLTRANSFERASE_ACTIVITY		23	0.45608804	1.307807	0.17043121	0.3549348	1.0	1154	tags=22%, list=9%, signal=24%
GO_TRNA_METHYLATION	GO_TRNA_METHYLATION		16	0.4808913	1.3067433	0.1888668	0.35609865	1.0	4438	tags=75%, list=35%, signal=116%
GO_RESPONSE_TO_VITAMIN_A	GO_RESPONSE_TO_VITAMIN_A		20	0.49111235	1.3059913	0.15841584	0.3567762	1.0	873	tags=20%, list=7%, signal=21%
GO_GLYCERALDEHYDE_3_PHOSPHATE_METABOLIC_PROCESS	GO_GLYCERALDEHYDE_3_PHOSPHATE_METABOLIC_PROCESS		15	0.59166527	1.303179	0.18480493	0.36127362	1.0	2373	tags=47%, list=19%, signal=58%
GO_RNA_CATABOLIC_PROCESS	GO_RNA_CATABOLIC_PROCESS		169	0.3385186	1.3028438	0.2446184	0.36119637	1.0	4665	tags=55%, list=37%, signal=86%
GO_G1_DNA_DAMAGE_CHECKPOINT	GO_G1_DNA_DAMAGE_CHECKPOINT		65	0.44159892	1.302142	0.15568863	0.3617781	1.0	1663	tags=31%, list=13%, signal=35%
GO_RIBONUCLEOSIDE_TRIPHOSPHATE_BIOSYNTHETIC_PROCESS	GO_RIBONUCLEOSIDE_TRIPHOSPHATE_BIOSYNTHETIC_PROCESS		37	0.38894877	1.301808	0.15243903	0.3616697	1.0	1931	tags=24%, list=15%, signal=29%
GO_NUCLEAR_BODY	GO_NUCLEAR_BODY		279	0.319327	1.3016785	0.19488189	0.36117056	1.0	3552	tags=41%, list=28%, signal=56%
GO_CENTRIOLAR_SATELLITE	GO_CENTRIOLAR_SATELLITE		18	0.46194506	1.3012145	0.132	0.36131668	1.0	2296	tags=39%, list=18%, signal=48%
GO_REGULATION_OF_CELLULAR_SENESCENCE	GO_REGULATION_OF_CELLULAR_SENESCENCE		22	0.496406	1.3001875	0.11089109	0.3624348	1.0	1876	tags=36%, list=15%, signal=43%
GO_PROTEIN_AUTOUBIQUITINATION	GO_PROTEIN_AUTOUBIQUITINATION		38	0.35533202	1.2999077	0.15163147	0.3622404	1.0	3449	tags=37%, list=28%, signal=51%
GO_LIPOPROTEIN_BIOSYNTHETIC_PROCESS	GO_LIPOPROTEIN_BIOSYNTHETIC_PROCESS		63	0.35129404	1.299465	0.14421253	0.36235517	1.0	2043	tags=24%, list=16%, signal=28%
GO_HISTONE_UBIQUITINATION	GO_HISTONE_UBIQUITINATION		27	0.43134683	1.2978064	0.21663442	0.36464128	1.0	3927	tags=56%, list=31%, signal=81%
GO_LIPID_DIGESTION	GO_LIPID_DIGESTION		15	0.68363243	1.2971102	0.11923077	0.3651981	1.0	1042	tags=40%, list=8%, signal=44%
GO_AXON_CYTOPLASM	GO_AXON_CYTOPLASM		21	0.44232386	1.2969463	0.17038539	0.3647878	1.0	750	tags=10%, list=6%, signal=10%
GO_TETRAPYRROLE_BIOSYNTHETIC_PROCESS	GO_TETRAPYRROLE_BIOSYNTHETIC_PROCESS		23	0.47804242	1.2955002	0.21183206	0.3667366	1.0	3351	tags=57%, list=27%, signal=77%
GO_REGULATION_OF_DNA_METABOLIC_PROCESS	GO_REGULATION_OF_DNA_METABOLIC_PROCESS		280	0.3585805	1.293088	0.12576064	0.37033	1.0	2462	tags=33%, list=20%, signal=40%
GO_REGULATION_OF_CELLULAR_PROTEIN_CATABOLIC_PROCESS	GO_REGULATION_OF_CELLULAR_PROTEIN_CATABOLIC_PROCESS		223	0.36092627	1.2898294	0.17227723	0.3756108	1.0	1141	tags=13%, list=9%, signal=14%
GO_PRECATALYTIC_SPLICEOSOME	GO_PRECATALYTIC_SPLICEOSOME		18	0.48719022	1.2896259	0.24436091	0.37526554	1.0	4651	tags=78%, list=37%, signal=124%
GO_NEGATIVE_REGULATION_OF_PROTEIN_CATABOLIC_PROCESS	GO_NEGATIVE_REGULATION_OF_PROTEIN_CATABOLIC_PROCESS		87	0.38574812	1.2894	0.14653465	0.374972	1.0	1098	tags=15%, list=9%, signal=16%
GO_EMBRYONIC_HINDLIMB_MORPHOGENESIS	GO_EMBRYONIC_HINDLIMB_MORPHOGENESIS		26	0.47919506	1.2879049	0.13373253	0.37700808	1.0	1415	tags=23%, list=11%, signal=26%
GO_REGULATION_OF_CELL_CYCLE_ARREST	GO_REGULATION_OF_CELL_CYCLE_ARREST		93	0.3907629	1.2875437	0.138	0.37695932	1.0	1751	tags=30%, list=14%, signal=35%
GO_SMALL_RIBOSOMAL_SUBUNIT	GO_SMALL_RIBOSOMAL_SUBUNIT		50	0.4169547	1.2865479	0.25240847	0.37805656	1.0	4684	tags=62%, list=37%, signal=99%
GO_PROTEIN_TARGETING_TO_MITOCHONDRION	GO_PROTEIN_TARGETING_TO_MITOCHONDRION		35	0.40364358	1.2849545	0.21484375	0.38040096	1.0	4067	tags=57%, list=32%, signal=84%
GO_REGULATION_OF_TELOMERE_MAINTENANCE	GO_REGULATION_OF_TELOMERE_MAINTENANCE		52	0.4082934	1.2846091	0.24266145	0.38033482	1.0	4226	tags=52%, list=34%, signal=78%
GO_RESPONSE_TO_UV	GO_RESPONSE_TO_UV		108	0.3695743	1.2845534	0.116	0.37971193	1.0	1605	tags=27%, list=13%, signal=31%
GO_POSITIVE_REGULATION_OF_CELL_CYCLE_G1_S_PHASE_TRANSITION	GO_POSITIVE_REGULATION_OF_CELL_CYCLE_G1_S_PHASE_TRANSITION		20	0.5027099	1.2817806	0.15243903	0.38424063	1.0	697	tags=20%, list=6%, signal=21%
GO_REGULATION_OF_GLUCOSE_TRANSPORT	GO_REGULATION_OF_GLUCOSE_TRANSPORT		89	0.35410863	1.281599	0.09486166	0.3838288	1.0	2490	tags=36%, list=20%, signal=45%
GO_DYNEIN_BINDING	GO_DYNEIN_BINDING		23	0.45769134	1.2803068	0.17322835	0.3855363	1.0	3681	tags=48%, list=29%, signal=68%
GO_NUCLEAR_CHROMATIN	GO_NUCLEAR_CHROMATIN		229	0.3325144	1.2798345	0.144	0.3856705	1.0	3627	tags=47%, list=29%, signal=65%
GO_BINDING_OF_SPERM_TO_ZONA_PELLUCIDA	GO_BINDING_OF_SPERM_TO_ZONA_PELLUCIDA		23	0.4654355	1.2779453	0.1756487	0.38854	1.0	3512	tags=39%, list=28%, signal=54%
GO_REGULATION_OF_CELL_AGING	GO_REGULATION_OF_CELL_AGING		28	0.46982318	1.2772427	0.13294798	0.38910136	1.0	1876	tags=32%, list=15%, signal=38%
GO_CYCLIN_BINDING	GO_CYCLIN_BINDING		17	0.47322112	1.2756569	0.15682282	0.3912651	1.0	1521	tags=41%, list=12%, signal=47%
GO_PEROXISOMAL_TRANSPORT	GO_PEROXISOMAL_TRANSPORT		17	0.48301074	1.2753787	0.19354838	0.39105278	1.0	3690	tags=47%, list=29%, signal=67%
GO_RIBONUCLEASE_ACTIVITY	GO_RIBONUCLEASE_ACTIVITY		65	0.35274488	1.2752888	0.13555992	0.3904911	1.0	3260	tags=42%, list=26%, signal=56%
GO_NEGATIVE_REGULATION_OF_PROTEIN_ACETYLATION	GO_NEGATIVE_REGULATION_OF_PROTEIN_ACETYLATION		18	0.40673593	1.2749059	0.20080322	0.39045542	1.0	2060	tags=28%, list=16%, signal=33%
GO_ASPARTATE_FAMILY_AMINO_ACID_METABOLIC_PROCESS	GO_ASPARTATE_FAMILY_AMINO_ACID_METABOLIC_PROCESS		46	0.48483518	1.2735279	0.19502868	0.39234883	1.0	1013	tags=22%, list=8%, signal=24%
GO_MACROMOLECULAR_COMPLEX_DISASSEMBLY	GO_MACROMOLECULAR_COMPLEX_DISASSEMBLY		136	0.34595466	1.273354	0.18164062	0.39193645	1.0	3797	tags=42%, list=30%, signal=59%
GO_PROTEASOMAL_PROTEIN_CATABOLIC_PROCESS	GO_PROTEASOMAL_PROTEIN_CATABOLIC_PROCESS		214	0.35696682	1.2721545	0.22648752	0.39346358	1.0	1138	tags=12%, list=9%, signal=13%
GO_GERM_CELL_NUCLEUS	GO_GERM_CELL_NUCLEUS		15	0.56258583	1.2714514	0.17515275	0.39409232	1.0	1901	tags=40%, list=15%, signal=47%
GO_MICROTUBULE_POLYMERIZATION_OR_DEPOLYMERIZATION	GO_MICROTUBULE_POLYMERIZATION_OR_DEPOLYMERIZATION		34	0.48944014	1.2705265	0.16064256	0.39506453	1.0	1186	tags=35%, list=9%, signal=39%
GO_PROTEIN_SERINE_THREONINE_KINASE_ACTIVITY	GO_PROTEIN_SERINE_THREONINE_KINASE_ACTIVITY		353	0.3044284	1.2704195	0.114519425	0.39455062	1.0	1907	tags=20%, list=15%, signal=23%
GO_INTRACELLULAR_ESTROGEN_RECEPTOR_SIGNALING_PATHWAY	GO_INTRACELLULAR_ESTROGEN_RECEPTOR_SIGNALING_PATHWAY		15	0.37332666	1.2703272	0.17623763	0.39401	1.0	3398	tags=33%, list=27%, signal=46%
GO_HISTONE_MRNA_METABOLIC_PROCESS	GO_HISTONE_MRNA_METABOLIC_PROCESS		20	0.48881665	1.2667984	0.2319688	0.39988717	1.0	4651	tags=70%, list=37%, signal=111%
GO_PROTEIN_IMPORT_INTO_NUCLEUS_TRANSLOCATION	GO_PROTEIN_IMPORT_INTO_NUCLEUS_TRANSLOCATION		26	0.37692666	1.2659243	0.16824196	0.40082538	1.0	1848	tags=27%, list=15%, signal=32%
GO_NEGATIVE_REGULATION_OF_CELL_AGING	GO_NEGATIVE_REGULATION_OF_CELL_AGING		15	0.53007793	1.2634864	0.17669173	0.40469122	1.0	1448	tags=33%, list=12%, signal=38%
GO_NEGATIVE_REGULATION_OF_DEFENSE_RESPONSE_TO_VIRUS	GO_NEGATIVE_REGULATION_OF_DEFENSE_RESPONSE_TO_VIRUS		18	0.47084236	1.2632407	0.17898832	0.40440735	1.0	2144	tags=39%, list=17%, signal=47%
GO_REGULATION_OF_KERATINOCYTE_DIFFERENTIATION	GO_REGULATION_OF_KERATINOCYTE_DIFFERENTIATION		22	0.47046608	1.262714	0.18724279	0.4046468	1.0	1415	tags=27%, list=11%, signal=31%
GO_CEREBELLAR_CORTEX_DEVELOPMENT	GO_CEREBELLAR_CORTEX_DEVELOPMENT		40	0.37183544	1.2606388	0.14624506	0.40776917	1.0	129	tags=8%, list=1%, signal=8%
GO_GENETIC_IMPRINTING	GO_GENETIC_IMPRINTING		16	0.5195014	1.2600315	0.16901408	0.40820414	1.0	453	tags=13%, list=4%, signal=13%
GO_RIBOSOMAL_SMALL_SUBUNIT_ASSEMBLY	GO_RIBOSOMAL_SMALL_SUBUNIT_ASSEMBLY		15	0.46865883	1.2595978	0.24950884	0.40825698	1.0	4829	tags=67%, list=39%, signal=108%
GO_CHROMATIN_DISASSEMBLY	GO_CHROMATIN_DISASSEMBLY		15	0.48659512	1.2592405	0.24561404	0.40815896	1.0	3907	tags=80%, list=31%, signal=116%
GO_NAD_DEPENDENT_PROTEIN_DEACETYLASE_ACTIVITY	GO_NAD_DEPENDENT_PROTEIN_DEACETYLASE_ACTIVITY		15	0.42631236	1.258167	0.21965317	0.40945798	1.0	4580	tags=73%, list=37%, signal=115%
GO_KINESIN_BINDING	GO_KINESIN_BINDING		27	0.40349042	1.2554322	0.1992263	0.41379103	1.0	138	tags=7%, list=1%, signal=7%
GO_POLYSACCHARIDE_CATABOLIC_PROCESS	GO_POLYSACCHARIDE_CATABOLIC_PROCESS		20	0.5375807	1.2538491	0.18473895	0.41601625	1.0	1907	tags=35%, list=15%, signal=41%
GO_POSITIVE_REGULATION_OF_G1_S_TRANSITION_OF_MITOTIC_CELL_CYCLE	GO_POSITIVE_REGULATION_OF_G1_S_TRANSITION_OF_MITOTIC_CELL_CYCLE		18	0.5157695	1.2534975	0.18069816	0.41598052	1.0	697	tags=22%, list=6%, signal=23%
GO_POSTSYNAPTIC_MEMBRANE_ORGANIZATION	GO_POSTSYNAPTIC_MEMBRANE_ORGANIZATION		22	0.5000695	1.2534585	0.18775511	0.41529995	1.0	1464	tags=23%, list=12%, signal=26%
GO_NUCLEOTIDE_EXCISION_REPAIR_DNA_DAMAGE_RECOGNITION	GO_NUCLEOTIDE_EXCISION_REPAIR_DNA_DAMAGE_RECOGNITION		23	0.4034442	1.2531264	0.25330812	0.415174	1.0	3721	tags=43%, list=30%, signal=62%
GO_NEGATIVE_REGULATION_OF_DNA_METABOLIC_PROCESS	GO_NEGATIVE_REGULATION_OF_DNA_METABOLIC_PROCESS		93	0.353409	1.2525034	0.17165668	0.41558865	1.0	2883	tags=37%, list=23%, signal=47%
GO_GLUTAMINE_FAMILY_AMINO_ACID_BIOSYNTHETIC_PROCESS	GO_GLUTAMINE_FAMILY_AMINO_ACID_BIOSYNTHETIC_PROCESS		17	0.63755554	1.2514855	0.18442623	0.4168304	1.0	669	tags=35%, list=5%, signal=37%
GO_MODIFIED_AMINO_ACID_TRANSPORT	GO_MODIFIED_AMINO_ACID_TRANSPORT		23	0.55168724	1.2514476	0.18343195	0.41617247	1.0	2030	tags=48%, list=16%, signal=57%
GO_NUCLEAR_NUCLEOSOME	GO_NUCLEAR_NUCLEOSOME		24	0.5848514	1.250545	0.29044834	0.41715154	1.0	4037	tags=71%, list=32%, signal=104%
GO_CELLULAR_PROTEIN_COMPLEX_DISASSEMBLY	GO_CELLULAR_PROTEIN_COMPLEX_DISASSEMBLY		84	0.39100033	1.2500501	0.22845691	0.417345	1.0	3857	tags=45%, list=31%, signal=65%
GO_FEMALE_GAMETE_GENERATION	GO_FEMALE_GAMETE_GENERATION		68	0.3927813	1.2497598	0.12398374	0.41713527	1.0	241	tags=13%, list=2%, signal=13%
GO_LIGASE_ACTIVITY_FORMING_CARBON_OXYGEN_BONDS	GO_LIGASE_ACTIVITY_FORMING_CARBON_OXYGEN_BONDS		31	0.45274788	1.2484951	0.2644135	0.41876373	1.0	3770	tags=55%, list=30%, signal=78%
GO_CELLULAR_COMPONENT_DISASSEMBLY_INVOLVED_IN_EXECUTION_PHASE_OF_APOPTOSIS	GO_CELLULAR_COMPONENT_DISASSEMBLY_INVOLVED_IN_EXECUTION_PHASE_OF_APOPTOSIS		39	0.36990124	1.2483983	0.17886178	0.41820276	1.0	1654	tags=26%, list=13%, signal=29%
GO_PROTEIN_DEPOLYMERIZATION	GO_PROTEIN_DEPOLYMERIZATION		19	0.57924426	1.2475396	0.2361111	0.41911396	1.0	165	tags=21%, list=1%, signal=21%
GO_CYTOSOLIC_LARGE_RIBOSOMAL_SUBUNIT	GO_CYTOSOLIC_LARGE_RIBOSOMAL_SUBUNIT		42	0.4113064	1.2473793	0.28355387	0.41867423	1.0	5215	tags=64%, list=42%, signal=110%
GO_GPI_ANCHOR_METABOLIC_PROCESS	GO_GPI_ANCHOR_METABOLIC_PROCESS		27	0.44940993	1.2452433	0.22932331	0.42202446	1.0	2305	tags=37%, list=18%, signal=45%
GO_REGULATION_OF_RNA_SPLICING	GO_REGULATION_OF_RNA_SPLICING		69	0.34001893	1.2415781	0.23856859	0.42829984	1.0	4495	tags=58%, list=36%, signal=90%
GO_REGULATION_OF_CIRCADIAN_RHYTHM	GO_REGULATION_OF_CIRCADIAN_RHYTHM		89	0.32464364	1.2409936	0.13530655	0.4286667	1.0	1524	tags=22%, list=12%, signal=25%
GO_REGULATION_OF_RESPONSE_TO_DNA_DAMAGE_STIMULUS	GO_REGULATION_OF_RESPONSE_TO_DNA_DAMAGE_STIMULUS		117	0.35546654	1.240876	0.19635628	0.42813057	1.0	2462	tags=35%, list=20%, signal=43%
GO_REGULATION_OF_INTRACELLULAR_ESTROGEN_RECEPTOR_SIGNALING_PATHWAY	GO_REGULATION_OF_INTRACELLULAR_ESTROGEN_RECEPTOR_SIGNALING_PATHWAY		22	0.41542193	1.2404948	0.20373832	0.42806175	1.0	1415	tags=18%, list=11%, signal=20%
GO_GLUCOSE_6_PHOSPHATE_METABOLIC_PROCESS	GO_GLUCOSE_6_PHOSPHATE_METABOLIC_PROCESS		20	0.49686167	1.2393062	0.186	0.4295256	1.0	2373	tags=35%, list=19%, signal=43%
GO_PROTEIN_MONOUBIQUITINATION	GO_PROTEIN_MONOUBIQUITINATION		41	0.39575294	1.239086	0.22891566	0.4292366	1.0	1774	tags=22%, list=14%, signal=25%
GO_NUCLEOSIDE_BISPHOSPHATE_METABOLIC_PROCESS	GO_NUCLEOSIDE_BISPHOSPHATE_METABOLIC_PROCESS		29	0.49236625	1.239056	0.21414538	0.4285564	1.0	1461	tags=28%, list=12%, signal=31%
GO_PLASMA_LIPOPROTEIN_PARTICLE_CLEARANCE	GO_PLASMA_LIPOPROTEIN_PARTICLE_CLEARANCE		19	0.5165907	1.2388005	0.19029126	0.42830834	1.0	458	tags=16%, list=4%, signal=16%
GO_REGULATION_OF_RETINOIC_ACID_RECEPTOR_SIGNALING_PATHWAY	GO_REGULATION_OF_RETINOIC_ACID_RECEPTOR_SIGNALING_PATHWAY		18	0.5322167	1.2384084	0.168	0.42833874	1.0	928	tags=33%, list=7%, signal=36%
GO_AP_TYPE_MEMBRANE_COAT_ADAPTOR_COMPLEX	GO_AP_TYPE_MEMBRANE_COAT_ADAPTOR_COMPLEX		29	0.33665475	1.2379216	0.21384929	0.42849454	1.0	2586	tags=24%, list=21%, signal=30%
GO_GLYCOSYL_COMPOUND_BIOSYNTHETIC_PROCESS	GO_GLYCOSYL_COMPOUND_BIOSYNTHETIC_PROCESS		91	0.3403807	1.2373803	0.17813765	0.4287953	1.0	2718	tags=30%, list=22%, signal=38%
GO_TRANSLATIONAL_INITIATION	GO_TRANSLATIONAL_INITIATION		113	0.3708301	1.2367915	0.31702545	0.42916793	1.0	4785	tags=50%, list=38%, signal=81%
GO_POSITIVE_REGULATION_OF_PROTEIN_MODIFICATION_BY_SMALL_PROTEIN_CONJUGATION_OR_REMOVAL	GO_POSITIVE_REGULATION_OF_PROTEIN_MODIFICATION_BY_SMALL_PROTEIN_CONJUGATION_OR_REMOVAL		154	0.3667917	1.235799	0.21	0.43026146	1.0	923	tags=13%, list=7%, signal=14%
GO_SYNAPTIC_VESICLE_ENDOCYTOSIS	GO_SYNAPTIC_VESICLE_ENDOCYTOSIS		15	0.4720589	1.235622	0.20428015	0.4298467	1.0	2607	tags=33%, list=21%, signal=42%
GO_SYNAPTONEMAL_COMPLEX_ORGANIZATION	GO_SYNAPTONEMAL_COMPLEX_ORGANIZATION		17	0.50073045	1.2353091	0.22289157	0.4297237	1.0	905	tags=24%, list=7%, signal=25%
GO_SERINE_FAMILY_AMINO_ACID_METABOLIC_PROCESS	GO_SERINE_FAMILY_AMINO_ACID_METABOLIC_PROCESS		33	0.5591029	1.2328185	0.2263056	0.43389472	1.0	1918	tags=39%, list=15%, signal=46%
GO_NEGATIVE_REGULATION_OF_TELOMERE_MAINTENANCE_VIA_TELOMERE_LENGTHENING	GO_NEGATIVE_REGULATION_OF_TELOMERE_MAINTENANCE_VIA_TELOMERE_LENGTHENING		15	0.4580762	1.23214	0.26930693	0.43447816	1.0	4226	tags=60%, list=34%, signal=90%
GO_MACROMOLECULE_DEACYLATION	GO_MACROMOLECULE_DEACYLATION		55	0.3145138	1.2309663	0.2061657	0.4358902	1.0	4580	tags=51%, list=37%, signal=80%
GO_MITOCHONDRIAL_MATRIX	GO_MITOCHONDRIAL_MATRIX		316	0.39132795	1.2309604	0.25343812	0.4351559	1.0	3330	tags=40%, list=27%, signal=53%
GO_SYNAPTIC_VESICLE_RECYCLING	GO_SYNAPTIC_VESICLE_RECYCLING		19	0.42461434	1.2296245	0.2109375	0.4369097	1.0	2607	tags=26%, list=21%, signal=33%
GO_THIOESTER_METABOLIC_PROCESS	GO_THIOESTER_METABOLIC_PROCESS		58	0.46196428	1.2290186	0.22970296	0.43733236	1.0	1874	tags=33%, list=15%, signal=38%
GO_UBIQUITIN_LIGASE_COMPLEX	GO_UBIQUITIN_LIGASE_COMPLEX		171	0.3282758	1.2269732	0.21115538	0.4405966	1.0	3708	tags=40%, list=30%, signal=56%
GO_AGGRESOME	GO_AGGRESOME		25	0.3363545	1.2243143	0.19959678	0.4450794	1.0	1574	tags=24%, list=13%, signal=27%
GO_REGULATION_OF_DNA_REPLICATION	GO_REGULATION_OF_DNA_REPLICATION		136	0.37218568	1.2243063	0.21115538	0.4443428	1.0	1152	tags=20%, list=9%, signal=22%
GO_POSITIVE_REGULATION_OF_CELLULAR_PROTEIN_CATABOLIC_PROCESS	GO_POSITIVE_REGULATION_OF_CELLULAR_PROTEIN_CATABOLIC_PROCESS		157	0.3537026	1.2242161	0.24055666	0.44376028	1.0	1141	tags=13%, list=9%, signal=14%
GO_GLUTAMINE_FAMILY_AMINO_ACID_METABOLIC_PROCESS	GO_GLUTAMINE_FAMILY_AMINO_ACID_METABOLIC_PROCESS		54	0.49493507	1.2237239	0.18664047	0.4439524	1.0	1320	tags=30%, list=11%, signal=33%
GO_NUCLEAR_TRANSCRIBED_MRNA_CATABOLIC_PROCESS_NONSENSE_MEDIATED_DECAY	GO_NUCLEAR_TRANSCRIBED_MRNA_CATABOLIC_PROCESS_NONSENSE_MEDIATED_DECAY		93	0.34076083	1.2235118	0.31764707	0.44359416	1.0	4748	tags=57%, list=38%, signal=91%
GO_NEGATIVE_REGULATION_OF_CELLULAR_CATABOLIC_PROCESS	GO_NEGATIVE_REGULATION_OF_CELLULAR_CATABOLIC_PROCESS		131	0.31340286	1.2229457	0.13765182	0.44393978	1.0	2663	tags=27%, list=21%, signal=35%
GO_MICROBODY_PART	GO_MICROBODY_PART		75	0.46002105	1.2228506	0.26190478	0.44340625	1.0	3690	tags=48%, list=29%, signal=68%
GO_ORGANELLAR_SMALL_RIBOSOMAL_SUBUNIT	GO_ORGANELLAR_SMALL_RIBOSOMAL_SUBUNIT		18	0.51875085	1.222134	0.2851638	0.44403338	1.0	4920	tags=83%, list=39%, signal=137%
GO_TELOMERE_CAPPING	GO_TELOMERE_CAPPING		22	0.45439905	1.2221009	0.24550898	0.44336253	1.0	3334	tags=45%, list=27%, signal=62%
GO_DNA_DAMAGE_RESPONSE_DETECTION_OF_DNA_DAMAGE	GO_DNA_DAMAGE_RESPONSE_DETECTION_OF_DNA_DAMAGE		33	0.48003432	1.2219905	0.26853707	0.4428325	1.0	1821	tags=33%, list=15%, signal=39%
GO_NUCLEAR_ENVELOPE	GO_NUCLEAR_ENVELOPE		328	0.3085314	1.21854	0.16078432	0.4490044	1.0	1964	tags=25%, list=16%, signal=29%
GO_NUCLEAR_MATRIX	GO_NUCLEAR_MATRIX		80	0.36816335	1.2175372	0.21428572	0.45018503	1.0	2897	tags=41%, list=23%, signal=53%
GO_VACUOLE_FUSION	GO_VACUOLE_FUSION		16	0.41639754	1.2158723	0.26294822	0.45267412	1.0	2531	tags=38%, list=20%, signal=47%
GO_PROTON_TRANSPORTING_ATP_SYNTHASE_COMPLEX	GO_PROTON_TRANSPORTING_ATP_SYNTHASE_COMPLEX		18	0.4657271	1.2151383	0.30938125	0.4533501	1.0	4701	tags=67%, list=38%, signal=107%
GO_ORGANELLAR_RIBOSOME	GO_ORGANELLAR_RIBOSOME		48	0.44093683	1.2144966	0.30232558	0.4538361	1.0	3857	tags=50%, list=31%, signal=72%
GO_MALE_GAMETE_GENERATION	GO_MALE_GAMETE_GENERATION		304	0.30147013	1.2134699	0.1417004	0.45517984	1.0	1648	tags=17%, list=13%, signal=20%
GO_REGULATION_OF_MEIOTIC_NUCLEAR_DIVISION	GO_REGULATION_OF_MEIOTIC_NUCLEAR_DIVISION		24	0.44937837	1.210758	0.23613963	0.4596644	1.0	741	tags=17%, list=6%, signal=18%
GO_HINDLIMB_MORPHOGENESIS	GO_HINDLIMB_MORPHOGENESIS		32	0.4249037	1.2107347	0.20841683	0.45894977	1.0	917	tags=16%, list=7%, signal=17%
GO_NEGATIVE_REGULATION_OF_CELL_CYCLE_G1_S_PHASE_TRANSITION	GO_NEGATIVE_REGULATION_OF_CELL_CYCLE_G1_S_PHASE_TRANSITION		84	0.3873056	1.2089832	0.23214285	0.46152595	1.0	1330	tags=26%, list=11%, signal=29%
GO_TUBULIN_BINDING	GO_TUBULIN_BINDING		209	0.3612784	1.2085714	0.16367266	0.46157512	1.0	1582	tags=21%, list=13%, signal=23%
GO_NEGATIVE_REGULATION_OF_FATTY_ACID_METABOLIC_PROCESS	GO_NEGATIVE_REGULATION_OF_FATTY_ACID_METABOLIC_PROCESS		18	0.50465125	1.2016118	0.22941177	0.47458938	1.0	2525	tags=39%, list=20%, signal=49%
GO_REGULATION_OF_MEIOTIC_CELL_CYCLE	GO_REGULATION_OF_MEIOTIC_CELL_CYCLE		33	0.42440754	1.2007353	0.23232323	0.4756331	1.0	741	tags=15%, list=6%, signal=16%
GO_POLYSOME	GO_POLYSOME		31	0.4025031	1.1992139	0.2765531	0.4778915	1.0	4601	tags=61%, list=37%, signal=97%
GO_DNA_CATABOLIC_PROCESS_ENDONUCLEOLYTIC	GO_DNA_CATABOLIC_PROCESS_ENDONUCLEOLYTIC		17	0.3957359	1.1976938	0.21327968	0.4801275	1.0	3997	tags=59%, list=32%, signal=86%
GO_NEGATIVE_REGULATION_OF_CYCLIN_DEPENDENT_PROTEIN_KINASE_ACTIVITY	GO_NEGATIVE_REGULATION_OF_CYCLIN_DEPENDENT_PROTEIN_KINASE_ACTIVITY		24	0.41953436	1.196288	0.22504893	0.48213208	1.0	1898	tags=29%, list=15%, signal=34%
GO_PROTEIN_LIPID_COMPLEX_ASSEMBLY	GO_PROTEIN_LIPID_COMPLEX_ASSEMBLY		18	0.53897715	1.1961824	0.26584867	0.48154616	1.0	1983	tags=33%, list=16%, signal=40%
GO_MRNA_SPLICE_SITE_SELECTION	GO_MRNA_SPLICE_SITE_SELECTION		19	0.4475537	1.195955	0.27675277	0.48123804	1.0	2074	tags=37%, list=17%, signal=44%
GO_CYTOSOLIC_PART	GO_CYTOSOLIC_PART		168	0.26694047	1.195896	0.20916335	0.48057693	1.0	4510	tags=47%, list=36%, signal=72%
GO_MITOCHONDRIAL_ATP_SYNTHESIS_COUPLED_PROTON_TRANSPORT	GO_MITOCHONDRIAL_ATP_SYNTHESIS_COUPLED_PROTON_TRANSPORT		16	0.4586276	1.1956186	0.3111546	0.48039556	1.0	4435	tags=63%, list=35%, signal=97%
GO_CARBON_OXYGEN_LYASE_ACTIVITY	GO_CARBON_OXYGEN_LYASE_ACTIVITY		60	0.39578164	1.194341	0.22619048	0.48216915	1.0	3670	tags=53%, list=29%, signal=75%
GO_AMIDE_BIOSYNTHETIC_PROCESS	GO_AMIDE_BIOSYNTHETIC_PROCESS		354	0.2943758	1.190683	0.250501	0.48888075	1.0	3868	tags=39%, list=31%, signal=55%
GO_RIBOSOMAL_SUBUNIT	GO_RIBOSOMAL_SUBUNIT		112	0.35082093	1.1899555	0.3392157	0.48958388	1.0	4748	tags=55%, list=38%, signal=88%
GO_RESPONSE_TO_FOLIC_ACID	GO_RESPONSE_TO_FOLIC_ACID		15	0.5068491	1.1899264	0.2038835	0.4888615	1.0	1747	tags=33%, list=14%, signal=39%
GO_MICROBODY_LUMEN	GO_MICROBODY_LUMEN		37	0.53979534	1.1887271	0.305835	0.4905348	1.0	3570	tags=49%, list=28%, signal=68%
GO_POSITIVE_REGULATION_OF_DNA_METABOLIC_PROCESS	GO_POSITIVE_REGULATION_OF_DNA_METABOLIC_PROCESS		158	0.34035116	1.1873367	0.20436507	0.49261042	1.0	2533	tags=33%, list=20%, signal=41%
GO_PROTEIN_POLYMERIZATION	GO_PROTEIN_POLYMERIZATION		57	0.35082847	1.185981	0.17745303	0.49460998	1.0	1186	tags=19%, list=9%, signal=21%
GO_DRUG_TRANSPORT	GO_DRUG_TRANSPORT		22	0.61202747	1.1841869	0.27309236	0.49753663	1.0	1486	tags=32%, list=12%, signal=36%
GO_UBIQUITIN_LIKE_PROTEIN_SPECIFIC_PROTEASE_ACTIVITY	GO_UBIQUITIN_LIKE_PROTEIN_SPECIFIC_PROTEASE_ACTIVITY		65	0.32714045	1.183471	0.24660194	0.4982283	1.0	3355	tags=42%, list=27%, signal=56%
GO_AMINE_BIOSYNTHETIC_PROCESS	GO_AMINE_BIOSYNTHETIC_PROCESS		19	0.44066492	1.1827914	0.25955734	0.49883592	1.0	1282	tags=26%, list=10%, signal=29%
GO_INTRAMOLECULAR_TRANSFERASE_ACTIVITY	GO_INTRAMOLECULAR_TRANSFERASE_ACTIVITY		16	0.5040906	1.1816357	0.2489712	0.50037533	1.0	2288	tags=50%, list=18%, signal=61%
GO_CELLULAR_METABOLIC_COMPOUND_SALVAGE	GO_CELLULAR_METABOLIC_COMPOUND_SALVAGE		30	0.44497284	1.177495	0.24596775	0.5080364	1.0	3787	tags=57%, list=30%, signal=81%
GO_GLUTAMATE_RECEPTOR_SIGNALING_PATHWAY	GO_GLUTAMATE_RECEPTOR_SIGNALING_PATHWAY		35	0.39587054	1.1770759	0.23404256	0.50812143	1.0	557	tags=14%, list=4%, signal=15%
GO_HEME_BIOSYNTHETIC_PROCESS	GO_HEME_BIOSYNTHETIC_PROCESS		18	0.44465807	1.1759604	0.2928709	0.5096198	1.0	3351	tags=56%, list=27%, signal=76%
GO_GLUTAMINE_FAMILY_AMINO_ACID_CATABOLIC_PROCESS	GO_GLUTAMINE_FAMILY_AMINO_ACID_CATABOLIC_PROCESS		23	0.5427983	1.1751742	0.25661916	0.5104253	1.0	1158	tags=30%, list=9%, signal=33%
GO_PROTEIN_K63_LINKED_UBIQUITINATION	GO_PROTEIN_K63_LINKED_UBIQUITINATION		28	0.3868494	1.1734806	0.30382293	0.51298404	1.0	3449	tags=43%, list=28%, signal=59%
GO_PEPTIDYL_GLUTAMIC_ACID_MODIFICATION	GO_PEPTIDYL_GLUTAMIC_ACID_MODIFICATION		23	0.5234515	1.1734277	0.25887266	0.5122937	1.0	1966	tags=35%, list=16%, signal=41%
GO_FATTY_ACYL_COA_BINDING	GO_FATTY_ACYL_COA_BINDING		26	0.51605844	1.1721969	0.33791748	0.51399416	1.0	2630	tags=42%, list=21%, signal=53%
GO_ORGANELLE_INNER_MEMBRANE	GO_ORGANELLE_INNER_MEMBRANE		365	0.30468667	1.1718925	0.26386234	0.5138662	1.0	3888	tags=41%, list=31%, signal=58%
GO_TRNA_BINDING	GO_TRNA_BINDING		24	0.4243948	1.1716115	0.30566803	0.5136641	1.0	4463	tags=54%, list=36%, signal=84%
GO_THYROID_HORMONE_RECEPTOR_BINDING	GO_THYROID_HORMONE_RECEPTOR_BINDING		29	0.35424834	1.17059	0.25	0.5150371	1.0	3628	tags=48%, list=29%, signal=68%
GO_HETEROTRIMERIC_G_PROTEIN_COMPLEX	GO_HETEROTRIMERIC_G_PROTEIN_COMPLEX		29	0.3853206	1.1698828	0.2520661	0.51572955	1.0	479	tags=10%, list=4%, signal=11%
GO_PROTEIN_K63_LINKED_DEUBIQUITINATION	GO_PROTEIN_K63_LINKED_DEUBIQUITINATION		19	0.38370213	1.1669548	0.29025844	0.5210181	1.0	3098	tags=37%, list=25%, signal=49%
GO_FEAR_RESPONSE	GO_FEAR_RESPONSE		26	0.37815264	1.1664517	0.28968254	0.521213	1.0	589	tags=12%, list=5%, signal=12%
GO_CYCLIN_DEPENDENT_PROTEIN_SERINE_THREONINE_KINASE_REGULATOR_ACTIVITY	GO_CYCLIN_DEPENDENT_PROTEIN_SERINE_THREONINE_KINASE_REGULATOR_ACTIVITY		23	0.46056113	1.1650841	0.2549801	0.5232187	1.0	1250	tags=26%, list=10%, signal=29%
GO_PROTEIN_COMPLEX_LOCALIZATION	GO_PROTEIN_COMPLEX_LOCALIZATION		38	0.39646053	1.1647581	0.26534653	0.5230495	1.0	3247	tags=47%, list=26%, signal=64%
GO_HISTONE_MONOUBIQUITINATION	GO_HISTONE_MONOUBIQUITINATION		17	0.43195763	1.1630204	0.29423076	0.5259353	1.0	3794	tags=53%, list=30%, signal=76%
GO_POSITIVE_REGULATION_OF_PROTEASOMAL_PROTEIN_CATABOLIC_PROCESS	GO_POSITIVE_REGULATION_OF_PROTEASOMAL_PROTEIN_CATABOLIC_PROCESS		78	0.32409906	1.1627467	0.26506025	0.52572596	1.0	2707	tags=29%, list=22%, signal=37%
GO_NITROGEN_COMPOUND_TRANSPORT	GO_NITROGEN_COMPOUND_TRANSPORT		404	0.26770473	1.1612791	0.10569106	0.5278634	1.0	2374	tags=25%, list=19%, signal=30%
GO_RETROGRADE_TRANSPORT_ENDOSOME_TO_GOLGI	GO_RETROGRADE_TRANSPORT_ENDOSOME_TO_GOLGI		51	0.3039324	1.1610631	0.28143713	0.527515	1.0	4130	tags=45%, list=33%, signal=67%
GO_ASPARTATE_FAMILY_AMINO_ACID_CATABOLIC_PROCESS	GO_ASPARTATE_FAMILY_AMINO_ACID_CATABOLIC_PROCESS		15	0.57395566	1.1599826	0.30738524	0.5289184	1.0	3061	tags=60%, list=24%, signal=79%
GO_ENERGY_COUPLED_PROTON_TRANSPORT_DOWN_ELECTROCHEMICAL_GRADIENT	GO_ENERGY_COUPLED_PROTON_TRANSPORT_DOWN_ELECTROCHEMICAL_GRADIENT		20	0.38762397	1.1596291	0.30738524	0.52882063	1.0	4435	tags=55%, list=35%, signal=85%
GO_RIBONUCLEOPROTEIN_GRANULE	GO_RIBONUCLEOPROTEIN_GRANULE		106	0.29538336	1.159611	0.28716904	0.5280504	1.0	3773	tags=42%, list=30%, signal=59%
GO_RESPONSE_TO_LIGHT_STIMULUS	GO_RESPONSE_TO_LIGHT_STIMULUS		231	0.26846296	1.1588829	0.18217821	0.5287378	1.0	2188	tags=23%, list=17%, signal=28%
GO_PEROXISOME_PROLIFERATOR_ACTIVATED_RECEPTOR_BINDING	GO_PEROXISOME_PROLIFERATOR_ACTIVATED_RECEPTOR_BINDING		15	0.42257327	1.1580405	0.2642998	0.52977896	1.0	1876	tags=33%, list=15%, signal=39%
GO_ATP_BIOSYNTHETIC_PROCESS	GO_ATP_BIOSYNTHETIC_PROCESS		28	0.35023278	1.157635	0.28313252	0.52982336	1.0	1649	tags=18%, list=13%, signal=21%
GO_PEPTIDYL_SERINE_MODIFICATION	GO_PEPTIDYL_SERINE_MODIFICATION		127	0.31961834	1.1575855	0.25726143	0.5291213	1.0	1090	tags=18%, list=9%, signal=20%
GO_NUCLEAR_TRANSCRIPTION_FACTOR_COMPLEX	GO_NUCLEAR_TRANSCRIPTION_FACTOR_COMPLEX		113	0.31374907	1.1571919	0.27364185	0.5291462	1.0	2844	tags=36%, list=23%, signal=47%
GO_POSITIVE_REGULATION_OF_CELL_CYCLE_ARREST	GO_POSITIVE_REGULATION_OF_CELL_CYCLE_ARREST		74	0.37296957	1.1553342	0.28402367	0.5321455	1.0	1330	tags=26%, list=11%, signal=29%
GO_REGULATION_OF_FATTY_ACID_OXIDATION	GO_REGULATION_OF_FATTY_ACID_OXIDATION		22	0.5079035	1.1536117	0.28870293	0.5350028	1.0	2525	tags=55%, list=20%, signal=68%
GO_INTRASPECIES_INTERACTION_BETWEEN_ORGANISMS	GO_INTRASPECIES_INTERACTION_BETWEEN_ORGANISMS		42	0.36130685	1.1528497	0.21484375	0.5358417	1.0	1026	tags=14%, list=8%, signal=16%
GO_NUCLEAR_MEMBRANE	GO_NUCLEAR_MEMBRANE		217	0.28912395	1.1527377	0.22379032	0.5352611	1.0	1964	tags=25%, list=16%, signal=29%
GO_THIOL_DEPENDENT_UBIQUITIN_SPECIFIC_PROTEASE_ACTIVITY	GO_THIOL_DEPENDENT_UBIQUITIN_SPECIFIC_PROTEASE_ACTIVITY		51	0.33756623	1.1507643	0.2765531	0.5386265	1.0	3355	tags=43%, list=27%, signal=59%
GO_GERM_CELL_DEVELOPMENT	GO_GERM_CELL_DEVELOPMENT		136	0.3071468	1.1499587	0.21756487	0.5394271	1.0	1024	tags=13%, list=8%, signal=13%
GO_GAMETE_GENERATION	GO_GAMETE_GENERATION		384	0.27497953	1.147902	0.18699187	0.54289883	1.0	1466	tags=15%, list=12%, signal=17%
GO_ANATOMICAL_STRUCTURE_HOMEOSTASIS	GO_ANATOMICAL_STRUCTURE_HOMEOSTASIS		225	0.29572752	1.147373	0.20299146	0.54317814	1.0	1014	tags=16%, list=8%, signal=17%
GO_ASPARTATE_FAMILY_AMINO_ACID_BIOSYNTHETIC_PROCESS	GO_ASPARTATE_FAMILY_AMINO_ACID_BIOSYNTHETIC_PROCESS		21	0.4743253	1.1468443	0.29674795	0.5434249	1.0	1013	tags=24%, list=8%, signal=26%
GO_REGULATION_OF_CILIUM_ASSEMBLY	GO_REGULATION_OF_CILIUM_ASSEMBLY		33	0.3379945	1.1461083	0.2951807	0.54413146	1.0	4094	tags=45%, list=33%, signal=67%
GO_MACROPHAGE_DIFFERENTIATION	GO_MACROPHAGE_DIFFERENTIATION		15	0.43348926	1.1451801	0.277666	0.54523474	1.0	2062	tags=33%, list=16%, signal=40%
GO_SIGNAL_SEQUENCE_BINDING	GO_SIGNAL_SEQUENCE_BINDING		35	0.34750617	1.1441196	0.34435797	0.54660743	1.0	4056	tags=49%, list=32%, signal=72%
GO_LIGAND_DEPENDENT_NUCLEAR_RECEPTOR_BINDING	GO_LIGAND_DEPENDENT_NUCLEAR_RECEPTOR_BINDING		22	0.37799823	1.1441089	0.28169015	0.5458156	1.0	1481	tags=23%, list=12%, signal=26%
GO_PROTEIN_UBIQUITINATION	GO_PROTEIN_UBIQUITINATION		431	0.27861932	1.1437646	0.28031808	0.5457238	1.0	3185	tags=29%, list=25%, signal=37%
GO_TRANSLATION_INITIATION_FACTOR_ACTIVITY	GO_TRANSLATION_INITIATION_FACTOR_ACTIVITY		40	0.38744897	1.1409009	0.34774068	0.55097604	1.0	3544	tags=33%, list=28%, signal=45%
GO_SNORNA_BINDING	GO_SNORNA_BINDING		20	0.43608016	1.1384953	0.34747475	0.5552156	1.0	3842	tags=60%, list=31%, signal=86%
GO_CELLULAR_RESPONSE_TO_LIGHT_STIMULUS	GO_CELLULAR_RESPONSE_TO_LIGHT_STIMULUS		79	0.3140904	1.1381441	0.21255061	0.55513996	1.0	1330	tags=20%, list=11%, signal=23%
GO_CATION_CATION_ANTIPORTER_ACTIVITY	GO_CATION_CATION_ANTIPORTER_ACTIVITY		17	0.41942027	1.1379452	0.30962342	0.5547366	1.0	267	tags=12%, list=2%, signal=12%
GO_ESTABLISHMENT_OF_LOCALIZATION_BY_MOVEMENT_ALONG_MICROTUBULE	GO_ESTABLISHMENT_OF_LOCALIZATION_BY_MOVEMENT_ALONG_MICROTUBULE		72	0.3278727	1.1375707	0.27676767	0.5547078	1.0	2242	tags=25%, list=18%, signal=30%
GO_UBIQUITIN_LIKE_PROTEIN_LIGASE_ACTIVITY	GO_UBIQUITIN_LIKE_PROTEIN_LIGASE_ACTIVITY		137	0.31615967	1.137263	0.30645162	0.5545051	1.0	3481	tags=37%, list=28%, signal=51%
GO_CELLULAR_CARBOHYDRATE_CATABOLIC_PROCESS	GO_CELLULAR_CARBOHYDRATE_CATABOLIC_PROCESS		26	0.46007872	1.131304	0.29423076	0.56629854	1.0	3285	tags=50%, list=26%, signal=68%
GO_PHOTORECEPTOR_DISC_MEMBRANE	GO_PHOTORECEPTOR_DISC_MEMBRANE		16	0.4074157	1.1304207	0.3359375	0.5673371	1.0	125	tags=6%, list=1%, signal=6%
GO_NEGATIVE_REGULATION_OF_PROTEIN_MODIFICATION_BY_SMALL_PROTEIN_CONJUGATION_OR_REMOVAL	GO_NEGATIVE_REGULATION_OF_PROTEIN_MODIFICATION_BY_SMALL_PROTEIN_CONJUGATION_OR_REMOVAL		110	0.3530117	1.1295552	0.32016632	0.5683111	1.0	114	tags=6%, list=1%, signal=6%
GO_UBIQUITIN_LIKE_PROTEIN_BINDING	GO_UBIQUITIN_LIKE_PROTEIN_BINDING		95	0.3134317	1.1271012	0.29090908	0.57271147	1.0	2840	tags=27%, list=23%, signal=35%
GO_NUCLEAR_IMPORT	GO_NUCLEAR_IMPORT		115	0.29148954	1.1267772	0.3151515	0.57250047	1.0	1964	tags=24%, list=16%, signal=29%
GO_RESPONSE_TO_VITAMIN_E	GO_RESPONSE_TO_VITAMIN_E		15	0.49826482	1.1244634	0.26556018	0.5765123	1.0	3142	tags=73%, list=25%, signal=98%
GO_PROTEIN_ADP_RIBOSYLATION	GO_PROTEIN_ADP_RIBOSYLATION		18	0.3985515	1.1241931	0.3095723	0.5761959	1.0	4212	tags=61%, list=34%, signal=92%
GO_SPERM_EGG_RECOGNITION	GO_SPERM_EGG_RECOGNITION		25	0.39558175	1.1241724	0.33267716	0.5753969	1.0	3512	tags=36%, list=28%, signal=50%
GO_PHOSPHATE_ION_TRANSPORT	GO_PHOSPHATE_ION_TRANSPORT		15	0.5225366	1.1241424	0.33397314	0.5746233	1.0	277	tags=20%, list=2%, signal=20%
GO_INCLUSION_BODY	GO_INCLUSION_BODY		55	0.25851434	1.1240231	0.26482213	0.574073	1.0	1574	tags=18%, list=13%, signal=21%
GO_CILIUM_ORGANIZATION	GO_CILIUM_ORGANIZATION		116	0.29895756	1.1238253	0.28599605	0.5736596	1.0	3373	tags=33%, list=27%, signal=44%
GO_UBIQUITIN_LIKE_PROTEIN_CONJUGATING_ENZYME_ACTIVITY	GO_UBIQUITIN_LIKE_PROTEIN_CONJUGATING_ENZYME_ACTIVITY		22	0.41337228	1.1233866	0.34567901	0.57376415	1.0	215	tags=9%, list=2%, signal=9%
GO_REGULATION_OF_PROTEIN_CATABOLIC_PROCESS	GO_REGULATION_OF_PROTEIN_CATABOLIC_PROCESS		320	0.29287302	1.1228297	0.28853756	0.5741063	1.0	1141	tags=12%, list=9%, signal=13%
GO_CELL_AGING	GO_CELL_AGING		57	0.34179607	1.1228031	0.2774451	0.5733265	1.0	1493	tags=23%, list=12%, signal=26%
GO_SULFUR_AMINO_ACID_BIOSYNTHETIC_PROCESS	GO_SULFUR_AMINO_ACID_BIOSYNTHETIC_PROCESS		17	0.5406199	1.1222752	0.35140562	0.57362205	1.0	2346	tags=41%, list=19%, signal=51%
GO_PHOTORECEPTOR_CONNECTING_CILIUM	GO_PHOTORECEPTOR_CONNECTING_CILIUM		25	0.3500952	1.1216186	0.3210634	0.5741225	1.0	1626	tags=20%, list=13%, signal=23%
GO_PYRIMIDINE_NUCLEOTIDE_METABOLIC_PROCESS	GO_PYRIMIDINE_NUCLEOTIDE_METABOLIC_PROCESS		33	0.37073126	1.1210902	0.30255404	0.57441866	1.0	2553	tags=42%, list=20%, signal=53%
GO_REGULATION_OF_HAIR_CYCLE	GO_REGULATION_OF_HAIR_CYCLE		18	0.40428892	1.1210574	0.3139535	0.5736614	1.0	1359	tags=22%, list=11%, signal=25%
GO_SINGLE_FERTILIZATION	GO_SINGLE_FERTILIZATION		72	0.32218447	1.1206222	0.28484848	0.57375574	1.0	1186	tags=13%, list=9%, signal=14%
GO_NUCLEAR_SPECK	GO_NUCLEAR_SPECK		155	0.2740684	1.1200974	0.30813953	0.57406706	1.0	4506	tags=54%, list=36%, signal=84%
GO_SEXUAL_REPRODUCTION	GO_SEXUAL_REPRODUCTION		484	0.25948435	1.1190755	0.22175732	0.57548314	1.0	1605	tags=15%, list=13%, signal=17%
GO_MICROTUBULE_BUNDLE_FORMATION	GO_MICROTUBULE_BUNDLE_FORMATION		37	0.3747458	1.1189346	0.29961088	0.57494247	1.0	1072	tags=16%, list=9%, signal=18%
GO_POSITIVE_REGULATION_OF_MRNA_PROCESSING	GO_POSITIVE_REGULATION_OF_MRNA_PROCESSING		22	0.39248025	1.118715	0.3243243	0.5745792	1.0	3823	tags=59%, list=31%, signal=85%
GO_SODIUM_ION_HOMEOSTASIS	GO_SODIUM_ION_HOMEOSTASIS		26	0.4156114	1.1181964	0.2851485	0.57487875	1.0	799	tags=19%, list=6%, signal=20%
GO_FERTILIZATION	GO_FERTILIZATION		95	0.3122125	1.1173514	0.26060605	0.5758216	1.0	2165	tags=19%, list=17%, signal=23%
GO_CELLULAR_RESPONSE_TO_UV	GO_CELLULAR_RESPONSE_TO_UV		59	0.34055614	1.1171385	0.26078433	0.57545996	1.0	1330	tags=25%, list=11%, signal=28%
GO_NUCLEOBASE_BIOSYNTHETIC_PROCESS	GO_NUCLEOBASE_BIOSYNTHETIC_PROCESS		16	0.46445915	1.1164361	0.3192771	0.5760707	1.0	2381	tags=56%, list=19%, signal=69%
GO_COFACTOR_BIOSYNTHETIC_PROCESS	GO_COFACTOR_BIOSYNTHETIC_PROCESS		128	0.35393447	1.1152146	0.32669324	0.57781523	1.0	3352	tags=45%, list=27%, signal=61%
GO_LYMPHOCYTE_APOPTOTIC_PROCESS	GO_LYMPHOCYTE_APOPTOTIC_PROCESS		18	0.3715879	1.1152135	0.288	0.57699984	1.0	1605	tags=22%, list=13%, signal=25%
GO_BRUSH_BORDER_MEMBRANE	GO_BRUSH_BORDER_MEMBRANE		46	0.40770438	1.1151105	0.2774451	0.57641214	1.0	626	tags=17%, list=5%, signal=18%
GO_GLYCOLIPID_BIOSYNTHETIC_PROCESS	GO_GLYCOLIPID_BIOSYNTHETIC_PROCESS		46	0.311687	1.1149678	0.270751	0.57593477	1.0	1993	tags=28%, list=16%, signal=33%
GO_VERY_LONG_CHAIN_FATTY_ACID_METABOLIC_PROCESS	GO_VERY_LONG_CHAIN_FATTY_ACID_METABOLIC_PROCESS		21	0.47866294	1.1124395	0.35271317	0.5806345	1.0	2197	tags=33%, list=18%, signal=40%
GO_REGULATION_OF_CELL_CYCLE_G1_S_PHASE_TRANSITION	GO_REGULATION_OF_CELL_CYCLE_G1_S_PHASE_TRANSITION		119	0.34640265	1.1117997	0.32405567	0.5811635	1.0	1428	tags=23%, list=11%, signal=25%
GO_PROTEIN_LOCALIZATION_TO_ORGANELLE	GO_PROTEIN_LOCALIZATION_TO_ORGANELLE		442	0.24716452	1.1115161	0.31836733	0.58095753	1.0	3917	tags=34%, list=31%, signal=47%
GO_MICROBODY	GO_MICROBODY		105	0.39229906	1.1106321	0.34055117	0.58200604	1.0	2119	tags=30%, list=17%, signal=36%
GO_AMINO_ACID_BETAINE_METABOLIC_PROCESS	GO_AMINO_ACID_BETAINE_METABOLIC_PROCESS		15	0.5856913	1.1097968	0.37349397	0.58292973	1.0	1666	tags=40%, list=13%, signal=46%
GO_POSITIVE_REGULATION_OF_TOR_SIGNALING	GO_POSITIVE_REGULATION_OF_TOR_SIGNALING		22	0.3584172	1.1096321	0.33333334	0.582445	1.0	3274	tags=55%, list=26%, signal=74%
GO_POSTTRANSCRIPTIONAL_GENE_SILENCING	GO_POSTTRANSCRIPTIONAL_GENE_SILENCING		28	0.3502734	1.1093134	0.33586338	0.58235437	1.0	4077	tags=50%, list=33%, signal=74%
GO_CYTOPLASMIC_MICROTUBULE_ORGANIZATION	GO_CYTOPLASMIC_MICROTUBULE_ORGANIZATION		27	0.363621	1.1085759	0.34705883	0.58303356	1.0	2204	tags=30%, list=18%, signal=36%
GO_SIGNAL_TRANSDUCTION_BY_P53_CLASS_MEDIATOR	GO_SIGNAL_TRANSDUCTION_BY_P53_CLASS_MEDIATOR		107	0.34674916	1.1061203	0.33598408	0.5873791	1.0	1330	tags=21%, list=11%, signal=24%
GO_NEUROTRANSMITTER_BINDING	GO_NEUROTRANSMITTER_BINDING		24	0.37042284	1.1054394	0.34791252	0.5879676	1.0	2599	tags=25%, list=21%, signal=31%
GO_LIGASE_ACTIVITY_FORMING_CARBON_SULFUR_BONDS	GO_LIGASE_ACTIVITY_FORMING_CARBON_SULFUR_BONDS		29	0.4577982	1.103598	0.35029355	0.5910151	1.0	1405	tags=24%, list=11%, signal=27%
GO_ADULT_BEHAVIOR	GO_ADULT_BEHAVIOR		115	0.29648045	1.1032727	0.28513238	0.5908444	1.0	909	tags=12%, list=7%, signal=13%
GO_POSITIVE_REGULATION_OF_CELLULAR_RESPONSE_TO_INSULIN_STIMULUS	GO_POSITIVE_REGULATION_OF_CELLULAR_RESPONSE_TO_INSULIN_STIMULUS		18	0.37491274	1.1030338	0.34393638	0.5905356	1.0	3665	tags=50%, list=29%, signal=71%
GO_ALPHA_TUBULIN_BINDING	GO_ALPHA_TUBULIN_BINDING		19	0.39757958	1.1018983	0.31434184	0.5921099	1.0	2296	tags=37%, list=18%, signal=45%
GO_LIPID_HOMEOSTASIS	GO_LIPID_HOMEOSTASIS		89	0.4221938	1.1004705	0.3177388	0.5943593	1.0	2197	tags=34%, list=18%, signal=41%
GO_EUCHROMATIN	GO_EUCHROMATIN		26	0.36151367	1.0980046	0.30518234	0.59870154	1.0	3613	tags=62%, list=29%, signal=86%
GO_STARTLE_RESPONSE	GO_STARTLE_RESPONSE		23	0.41006556	1.096676	0.3495935	0.60070485	1.0	1368	tags=17%, list=11%, signal=19%
GO_MITOCHONDRIAL_TRANSPORT	GO_MITOCHONDRIAL_TRANSPORT		132	0.2763738	1.0951142	0.29919678	0.603168	1.0	2873	tags=33%, list=23%, signal=42%
GO_THIOLESTER_HYDROLASE_ACTIVITY	GO_THIOLESTER_HYDROLASE_ACTIVITY		20	0.41335112	1.0948392	0.3699422	0.6029059	1.0	2714	tags=35%, list=22%, signal=45%
GO_MICROTUBULE_POLYMERIZATION	GO_MICROTUBULE_POLYMERIZATION		24	0.38341206	1.0943961	0.32900432	0.60303116	1.0	1186	tags=29%, list=9%, signal=32%
GO_PROTEIN_TRANSPORT_ALONG_MICROTUBULE	GO_PROTEIN_TRANSPORT_ALONG_MICROTUBULE		20	0.43225902	1.0943756	0.36137667	0.6022417	1.0	3609	tags=55%, list=29%, signal=77%
GO_PROTEIN_SERINE_THREONINE_PHOSPHATASE_ACTIVITY	GO_PROTEIN_SERINE_THREONINE_PHOSPHATASE_ACTIVITY		50	0.30870342	1.0936842	0.31504065	0.60286874	1.0	2473	tags=26%, list=20%, signal=32%
GO_RESPONSE_TO_FOOD	GO_RESPONSE_TO_FOOD		18	0.4773136	1.0931474	0.35351562	0.6031869	1.0	223	tags=17%, list=2%, signal=17%
GO_CILIARY_BASAL_BODY	GO_CILIARY_BASAL_BODY		53	0.350926	1.092826	0.35785288	0.6030307	1.0	3247	tags=38%, list=26%, signal=51%
GO_ALCOHOL_BIOSYNTHETIC_PROCESS	GO_ALCOHOL_BIOSYNTHETIC_PROCESS		89	0.36581892	1.0920756	0.29607844	0.60380876	1.0	2255	tags=36%, list=18%, signal=44%
GO_RESPONSE_TO_COCAINE	GO_RESPONSE_TO_COCAINE		44	0.34421182	1.0917598	0.31	0.60367835	1.0	1018	tags=14%, list=8%, signal=15%
GO_STEROL_BIOSYNTHETIC_PROCESS	GO_STEROL_BIOSYNTHETIC_PROCESS		38	0.4727488	1.0913289	0.38019803	0.6037868	1.0	1558	tags=42%, list=12%, signal=48%
GO_NUCLEOSIDE_MONOPHOSPHATE_METABOLIC_PROCESS	GO_NUCLEOSIDE_MONOPHOSPHATE_METABOLIC_PROCESS		195	0.26700243	1.0900732	0.3044355	0.60559916	1.0	3236	tags=29%, list=26%, signal=39%
GO_HISTONE_DEACETYLASE_BINDING	GO_HISTONE_DEACETYLASE_BINDING		89	0.29312924	1.0900493	0.31340206	0.604821	1.0	1945	tags=20%, list=16%, signal=24%
GO_RESPONSE_TO_GLUCAGON	GO_RESPONSE_TO_GLUCAGON		43	0.38251552	1.0894034	0.34560326	0.6053191	1.0	1303	tags=14%, list=10%, signal=16%
GO_REGULATION_OF_SULFUR_METABOLIC_PROCESS	GO_REGULATION_OF_SULFUR_METABOLIC_PROCESS		18	0.4412297	1.0890903	0.3360324	0.6051593	1.0	781	tags=22%, list=6%, signal=24%
GO_BETA_CATENIN_TCF_COMPLEX_ASSEMBLY	GO_BETA_CATENIN_TCF_COMPLEX_ASSEMBLY		31	0.36949545	1.0874777	0.32304525	0.60771084	1.0	3760	tags=45%, list=30%, signal=64%
GO_AXO_DENDRITIC_TRANSPORT	GO_AXO_DENDRITIC_TRANSPORT		24	0.33507025	1.0863703	0.35992217	0.60923743	1.0	2002	tags=17%, list=16%, signal=20%
GO_NUCLEOBASE_CONTAINING_SMALL_MOLECULE_INTERCONVERSION	GO_NUCLEOBASE_CONTAINING_SMALL_MOLECULE_INTERCONVERSION		16	0.48017123	1.0861188	0.3599182	0.60890627	1.0	2309	tags=31%, list=18%, signal=38%
GO_C21_STEROID_HORMONE_METABOLIC_PROCESS	GO_C21_STEROID_HORMONE_METABOLIC_PROCESS		22	0.47514036	1.0831527	0.3360825	0.61431277	1.0	585	tags=23%, list=5%, signal=24%
GO_POSITIVE_REGULATION_OF_MRNA_METABOLIC_PROCESS	GO_POSITIVE_REGULATION_OF_MRNA_METABOLIC_PROCESS		30	0.34811935	1.0831212	0.3655706	0.61355877	1.0	3823	tags=47%, list=31%, signal=67%
GO_UDP_GALACTOSYLTRANSFERASE_ACTIVITY	GO_UDP_GALACTOSYLTRANSFERASE_ACTIVITY		21	0.3903947	1.0825442	0.38912135	0.6139282	1.0	1154	tags=19%, list=9%, signal=21%
GO_PHOSPHATIDYLINOSITOL_4_5_BISPHOSPHATE_BINDING	GO_PHOSPHATIDYLINOSITOL_4_5_BISPHOSPHATE_BINDING		37	0.35734564	1.0820401	0.33950618	0.6141858	1.0	363	tags=8%, list=3%, signal=8%
GO_ACYL_COA_DEHYDROGENASE_ACTIVITY	GO_ACYL_COA_DEHYDROGENASE_ACTIVITY		15	0.5602386	1.0820075	0.43137255	0.6134439	1.0	2327	tags=40%, list=19%, signal=49%
GO_ORGANIC_HYDROXY_COMPOUND_BIOSYNTHETIC_PROCESS	GO_ORGANIC_HYDROXY_COMPOUND_BIOSYNTHETIC_PROCESS		147	0.36426234	1.0818105	0.31620553	0.61300963	1.0	1558	tags=26%, list=12%, signal=29%
GO_NEGATIVE_REGULATION_OF_CELLULAR_AMIDE_METABOLIC_PROCESS	GO_NEGATIVE_REGULATION_OF_CELLULAR_AMIDE_METABOLIC_PROCESS		95	0.27880588	1.0812923	0.33786407	0.6133201	1.0	3748	tags=42%, list=30%, signal=60%
GO_GLUTAMATE_METABOLIC_PROCESS	GO_GLUTAMATE_METABOLIC_PROCESS		21	0.52993786	1.08102	0.359375	0.6130744	1.0	669	tags=24%, list=5%, signal=25%
GO_POSITIVE_REGULATION_OF_PROTEIN_CATABOLIC_PROCESS	GO_POSITIVE_REGULATION_OF_PROTEIN_CATABOLIC_PROCESS		216	0.29271552	1.0781037	0.3483366	0.6186061	1.0	976	tags=11%, list=8%, signal=12%
GO_REGULATION_OF_ISOTYPE_SWITCHING	GO_REGULATION_OF_ISOTYPE_SWITCHING		22	0.38138783	1.0770055	0.35918367	0.62009376	1.0	2244	tags=32%, list=18%, signal=39%
GO_DYNEIN_COMPLEX	GO_DYNEIN_COMPLEX		30	0.29245263	1.0766467	0.36526945	0.6200112	1.0	1574	tags=13%, list=13%, signal=15%
GO_BAF_TYPE_COMPLEX	GO_BAF_TYPE_COMPLEX		21	0.36121738	1.0757898	0.3826923	0.6209561	1.0	3760	tags=62%, list=30%, signal=88%
GO_REGULATION_OF_CELLULAR_RESPONSE_TO_HEAT	GO_REGULATION_OF_CELLULAR_RESPONSE_TO_HEAT		67	0.34289926	1.0750781	0.38508064	0.6216551	1.0	3663	tags=45%, list=29%, signal=63%
GO_ESTABLISHMENT_OF_MITOTIC_SPINDLE_ORIENTATION	GO_ESTABLISHMENT_OF_MITOTIC_SPINDLE_ORIENTATION		17	0.40863356	1.0745502	0.36758894	0.6218976	1.0	466	tags=12%, list=4%, signal=12%
GO_MONOSACCHARIDE_CATABOLIC_PROCESS	GO_MONOSACCHARIDE_CATABOLIC_PROCESS		51	0.36436072	1.0736617	0.3442623	0.6228749	1.0	1206	tags=24%, list=10%, signal=26%
GO_CELLULAR_RESPONSE_TO_ALKALOID	GO_CELLULAR_RESPONSE_TO_ALKALOID		29	0.38854653	1.0733831	0.34719336	0.62263465	1.0	1481	tags=24%, list=12%, signal=27%
GO_SOLUTE_CATION_ANTIPORTER_ACTIVITY	GO_SOLUTE_CATION_ANTIPORTER_ACTIVITY		19	0.39930058	1.0730885	0.39156628	0.62246275	1.0	267	tags=11%, list=2%, signal=11%
GO_SULFUR_COMPOUND_TRANSPORT	GO_SULFUR_COMPOUND_TRANSPORT		21	0.44992125	1.0716097	0.3732535	0.62484795	1.0	2030	tags=43%, list=16%, signal=51%
GO_NEUROTRANSMITTER_SODIUM_SYMPORTER_ACTIVITY	GO_NEUROTRANSMITTER_SODIUM_SYMPORTER_ACTIVITY		16	0.4716142	1.0706432	0.36575052	0.62605536	1.0	465	tags=19%, list=4%, signal=19%
GO_CELL_DIFFERENTIATION_INVOLVED_IN_EMBRYONIC_PLACENTA_DEVELOPMENT	GO_CELL_DIFFERENTIATION_INVOLVED_IN_EMBRYONIC_PLACENTA_DEVELOPMENT		23	0.40308884	1.0693835	0.3432836	0.62791556	1.0	1428	tags=22%, list=11%, signal=24%
GO_RNA_DEPENDENT_DNA_BIOSYNTHETIC_PROCESS	GO_RNA_DEPENDENT_DNA_BIOSYNTHETIC_PROCESS		18	0.37737554	1.0686594	0.4019231	0.6286292	1.0	4304	tags=50%, list=34%, signal=76%
GO_POLYOL_CATABOLIC_PROCESS	GO_POLYOL_CATABOLIC_PROCESS		16	0.37581253	1.0681319	0.37274548	0.6289237	1.0	2713	tags=38%, list=22%, signal=48%
GO_CILIUM	GO_CILIUM		299	0.23967658	1.0677911	0.31287128	0.628776	1.0	2242	tags=18%, list=18%, signal=22%
GO_PRESYNAPTIC_ACTIVE_ZONE	GO_PRESYNAPTIC_ACTIVE_ZONE		24	0.3860215	1.06753	0.37184873	0.62848175	1.0	2067	tags=29%, list=16%, signal=35%
GO_INTRACILIARY_TRANSPORT_PARTICLE	GO_INTRACILIARY_TRANSPORT_PARTICLE		21	0.41825736	1.0657775	0.4169884	0.63137996	1.0	3609	tags=48%, list=29%, signal=67%
GO_REGULATION_OF_PROTEIN_ACETYLATION	GO_REGULATION_OF_PROTEIN_ACETYLATION		56	0.29142824	1.0643686	0.3443299	0.6336285	1.0	2183	tags=29%, list=17%, signal=34%
GO_REGULATION_OF_TRANSLATIONAL_INITIATION	GO_REGULATION_OF_TRANSLATIONAL_INITIATION		67	0.29016745	1.0636307	0.3468992	0.6343894	1.0	2729	tags=27%, list=22%, signal=34%
GO_CELLULAR_PIGMENTATION	GO_CELLULAR_PIGMENTATION		34	0.34973076	1.0628637	0.35029355	0.6352353	1.0	2719	tags=26%, list=22%, signal=34%
GO_VESICLE_MEDIATED_TRANSPORT_BETWEEN_ENDOSOMAL_COMPARTMENTS	GO_VESICLE_MEDIATED_TRANSPORT_BETWEEN_ENDOSOMAL_COMPARTMENTS		16	0.4194447	1.0627242	0.3627451	0.6347128	1.0	1905	tags=31%, list=15%, signal=37%
GO_DEMETHYLASE_ACTIVITY	GO_DEMETHYLASE_ACTIVITY		26	0.3820179	1.06085	0.39328063	0.6378647	1.0	3854	tags=38%, list=31%, signal=55%
GO_TRANSLATIONAL_TERMINATION	GO_TRANSLATIONAL_TERMINATION		61	0.36879325	1.0598704	0.4241245	0.63909405	1.0	3976	tags=46%, list=32%, signal=67%
GO_POSITIVE_REGULATION_OF_PROTEIN_EXPORT_FROM_NUCLEUS	GO_POSITIVE_REGULATION_OF_PROTEIN_EXPORT_FROM_NUCLEUS		17	0.40118653	1.0597192	0.37843138	0.6386083	1.0	1824	tags=35%, list=15%, signal=41%
GO_PEPTIDE_METABOLIC_PROCESS	GO_PEPTIDE_METABOLIC_PROCESS		411	0.24943157	1.0580564	0.35515872	0.64135283	1.0	3877	tags=38%, list=31%, signal=54%
GO_NLS_BEARING_PROTEIN_IMPORT_INTO_NUCLEUS	GO_NLS_BEARING_PROTEIN_IMPORT_INTO_NUCLEUS		20	0.38930506	1.0578569	0.4004065	0.6409373	1.0	675	tags=15%, list=5%, signal=16%
GO_AMMONIUM_TRANSMEMBRANE_TRANSPORT	GO_AMMONIUM_TRANSMEMBRANE_TRANSPORT		21	0.45712212	1.0568075	0.39419088	0.6423836	1.0	1110	tags=33%, list=9%, signal=37%
GO_PROTEIN_KINASE_COMPLEX	GO_PROTEIN_KINASE_COMPLEX		80	0.2798398	1.0566307	0.35882354	0.6419198	1.0	1907	tags=21%, list=15%, signal=25%
GO_PHENOL_CONTAINING_COMPOUND_BIOSYNTHETIC_PROCESS	GO_PHENOL_CONTAINING_COMPOUND_BIOSYNTHETIC_PROCESS		30	0.3945879	1.0554558	0.36308315	0.643628	1.0	1158	tags=17%, list=9%, signal=18%
GO_RESPONSE_TO_ACETYLCHOLINE	GO_RESPONSE_TO_ACETYLCHOLINE		16	0.36664572	1.0549098	0.39679357	0.64394355	1.0	2095	tags=19%, list=17%, signal=22%
GO_GAMMA_TUBULIN_BINDING	GO_GAMMA_TUBULIN_BINDING		19	0.43985817	1.0540656	0.3856859	0.644874	1.0	1777	tags=32%, list=14%, signal=37%
GO_CELLULAR_RESPONSE_TO_NITRIC_OXIDE	GO_CELLULAR_RESPONSE_TO_NITRIC_OXIDE		15	0.4308703	1.0525588	0.38655463	0.64729625	1.0	135	tags=13%, list=1%, signal=13%
GO_PROTEIN_EXPORT_FROM_NUCLEUS	GO_PROTEIN_EXPORT_FROM_NUCLEUS		23	0.3534012	1.0524223	0.37966806	0.6467663	1.0	3753	tags=52%, list=30%, signal=74%
GO_GOLGI_VESICLE_TRANSPORT	GO_GOLGI_VESICLE_TRANSPORT		258	0.2555342	1.0512042	0.38663968	0.64860916	1.0	2361	tags=18%, list=19%, signal=22%
GO_ALPHA_AMINO_ACID_METABOLIC_PROCESS	GO_ALPHA_AMINO_ACID_METABOLIC_PROCESS		184	0.3830373	1.0503806	0.38264298	0.6495807	1.0	1994	tags=27%, list=16%, signal=31%
GO_NAD_ADP_RIBOSYLTRANSFERASE_ACTIVITY	GO_NAD_ADP_RIBOSYLTRANSFERASE_ACTIVITY		21	0.340862	1.0478727	0.41164657	0.65399754	1.0	4212	tags=62%, list=34%, signal=93%
GO_RETROMER_COMPLEX	GO_RETROMER_COMPLEX		17	0.31761616	1.0476092	0.4007782	0.6537096	1.0	4599	tags=53%, list=37%, signal=84%
GO_HSP70_PROTEIN_BINDING	GO_HSP70_PROTEIN_BINDING		27	0.37819096	1.0475254	0.3995984	0.653052	1.0	2486	tags=26%, list=20%, signal=32%
GO_DRUG_TRANSMEMBRANE_TRANSPORT	GO_DRUG_TRANSMEMBRANE_TRANSPORT		17	0.5804509	1.0426587	0.4516129	0.6626475	1.0	474	tags=24%, list=4%, signal=24%
GO_LIPID_PARTICLE	GO_LIPID_PARTICLE		51	0.31502533	1.0401484	0.3668033	0.6672935	1.0	2171	tags=25%, list=17%, signal=31%
GO_RNA_POLYADENYLATION	GO_RNA_POLYADENYLATION		21	0.3434216	1.0385506	0.42382812	0.66993415	1.0	3066	tags=33%, list=24%, signal=44%
GO_MAP_KINASE_KINASE_KINASE_ACTIVITY	GO_MAP_KINASE_KINASE_KINASE_ACTIVITY		18	0.3762881	1.0367833	0.41046277	0.6728613	1.0	3774	tags=50%, list=30%, signal=71%
GO_CHOLESTEROL_EFFLUX	GO_CHOLESTEROL_EFFLUX		22	0.42368186	1.0366286	0.3880309	0.6723625	1.0	641	tags=18%, list=5%, signal=19%
GO_RESPONSE_TO_GONADOTROPIN	GO_RESPONSE_TO_GONADOTROPIN		24	0.42921773	1.0363383	0.401222	0.67211294	1.0	939	tags=25%, list=7%, signal=27%
GO_POSITIVE_REGULATION_OF_DNA_REPLICATION	GO_POSITIVE_REGULATION_OF_DNA_REPLICATION		77	0.319848	1.0355953	0.39053255	0.67290837	1.0	1090	tags=17%, list=9%, signal=18%
GO_ANTIGEN_PROCESSING_AND_PRESENTATION_OF_PEPTIDE_ANTIGEN	GO_ANTIGEN_PROCESSING_AND_PRESENTATION_OF_PEPTIDE_ANTIGEN		153	0.34904397	1.0348518	0.39915967	0.67364967	1.0	222	tags=7%, list=2%, signal=7%
GO_VESICLE_CYTOSKELETAL_TRAFFICKING	GO_VESICLE_CYTOSKELETAL_TRAFFICKING		29	0.35412	1.0340137	0.40083507	0.6746187	1.0	4142	tags=48%, list=33%, signal=72%
GO_NEGATIVE_REGULATION_OF_CATABOLIC_PROCESS	GO_NEGATIVE_REGULATION_OF_CATABOLIC_PROCESS		167	0.2568445	1.0326184	0.37979797	0.6768194	1.0	1671	tags=16%, list=13%, signal=18%
GO_TRANSLATIONAL_ELONGATION	GO_TRANSLATIONAL_ELONGATION		72	0.33050475	1.032355	0.43159923	0.6765289	1.0	4721	tags=44%, list=38%, signal=71%
GO_POSITIVE_REGULATION_OF_EPIDERMAL_CELL_DIFFERENTIATION	GO_POSITIVE_REGULATION_OF_EPIDERMAL_CELL_DIFFERENTIATION		17	0.44285977	1.0322217	0.41237113	0.6759737	1.0	1415	tags=35%, list=11%, signal=40%
GO_CHD_TYPE_COMPLEX	GO_CHD_TYPE_COMPLEX		16	0.3815002	1.0319675	0.43110237	0.6756668	1.0	4350	tags=56%, list=35%, signal=86%
GO_NEGATIVE_REGULATION_OF_TELOMERE_MAINTENANCE	GO_NEGATIVE_REGULATION_OF_TELOMERE_MAINTENANCE		24	0.32738164	1.0312192	0.41046277	0.6764516	1.0	3221	tags=38%, list=26%, signal=50%
GO_STEROID_BIOSYNTHETIC_PROCESS	GO_STEROID_BIOSYNTHETIC_PROCESS		98	0.40714818	1.0309193	0.39691713	0.67629874	1.0	1604	tags=36%, list=13%, signal=41%
GO_REGULATION_OF_PROTEIN_MODIFICATION_BY_SMALL_PROTEIN_CONJUGATION_OR_REMOVAL	GO_REGULATION_OF_PROTEIN_MODIFICATION_BY_SMALL_PROTEIN_CONJUGATION_OR_REMOVAL		216	0.2833894	1.030447	0.41616163	0.67646796	1.0	1141	tags=12%, list=9%, signal=13%
GO_REGULATION_OF_CYTOSKELETON_ORGANIZATION	GO_REGULATION_OF_CYTOSKELETON_ORGANIZATION		408	0.29949385	1.0302107	0.4225352	0.67614263	1.0	1003	tags=14%, list=8%, signal=15%
GO_DNA_TEMPLATED_TRANSCRIPTION_INITIATION	GO_DNA_TEMPLATED_TRANSCRIPTION_INITIATION		175	0.25725204	1.029748	0.38979593	0.67625314	1.0	2844	tags=33%, list=23%, signal=42%
GO_CELLULAR_AMINO_ACID_METABOLIC_PROCESS	GO_CELLULAR_AMINO_ACID_METABOLIC_PROCESS		266	0.34625098	1.0291694	0.41141734	0.67673284	1.0	2595	tags=30%, list=21%, signal=37%
GO_NUCLEAR_TRANSPORT	GO_NUCLEAR_TRANSPORT		279	0.24657765	1.028497	0.41683367	0.67731935	1.0	4069	tags=43%, list=32%, signal=62%
GO_ORGANIC_ACID_TRANSMEMBRANE_TRANSPORT	GO_ORGANIC_ACID_TRANSMEMBRANE_TRANSPORT		71	0.3974705	1.0282627	0.41566265	0.6769971	1.0	2374	tags=38%, list=19%, signal=47%
GO_CILIARY_PLASM	GO_CILIARY_PLASM		49	0.28136417	1.0280842	0.4453125	0.6765523	1.0	3555	tags=31%, list=28%, signal=43%
GO_NUCLEOBASE_CONTAINING_COMPOUND_KINASE_ACTIVITY	GO_NUCLEOBASE_CONTAINING_COMPOUND_KINASE_ACTIVITY		32	0.30563062	1.0280284	0.4008097	0.67582864	1.0	2892	tags=28%, list=23%, signal=36%
GO_NEGATIVE_REGULATION_OF_RESPONSE_TO_BIOTIC_STIMULUS	GO_NEGATIVE_REGULATION_OF_RESPONSE_TO_BIOTIC_STIMULUS		26	0.3670744	1.027401	0.404	0.67634284	1.0	2144	tags=31%, list=17%, signal=37%
GO_LONG_CHAIN_FATTY_ACID_TRANSPORT	GO_LONG_CHAIN_FATTY_ACID_TRANSPORT		33	0.39921427	1.0268215	0.41344196	0.6767853	1.0	1666	tags=33%, list=13%, signal=38%
GO_CELLULAR_PROCESS_INVOLVED_IN_REPRODUCTION_IN_MULTICELLULAR_ORGANISM	GO_CELLULAR_PROCESS_INVOLVED_IN_REPRODUCTION_IN_MULTICELLULAR_ORGANISM		171	0.25438464	1.0259025	0.3809524	0.677922	1.0	1421	tags=13%, list=11%, signal=15%
GO_CEREBELLAR_PURKINJE_CELL_LAYER_DEVELOPMENT	GO_CEREBELLAR_PURKINJE_CELL_LAYER_DEVELOPMENT		21	0.33534878	1.0254605	0.41568628	0.6780589	1.0	63	tags=5%, list=1%, signal=5%
GO_SH2_DOMAIN_BINDING	GO_SH2_DOMAIN_BINDING		25	0.3569926	1.023877	0.426	0.68068534	1.0	1021	tags=12%, list=8%, signal=13%
GO_POSITIVE_REGULATION_OF_TRANSCRIPTION_INITIATION_FROM_RNA_POLYMERASE_II_PROMOTER	GO_POSITIVE_REGULATION_OF_TRANSCRIPTION_INITIATION_FROM_RNA_POLYMERASE_II_PROMOTER		17	0.319344	1.0237362	0.4035433	0.68014336	1.0	3515	tags=41%, list=28%, signal=57%
GO_AMMONIUM_TRANSMEMBRANE_TRANSPORTER_ACTIVITY	GO_AMMONIUM_TRANSMEMBRANE_TRANSPORTER_ACTIVITY		21	0.41967922	1.0232788	0.4347826	0.68025327	1.0	393	tags=19%, list=3%, signal=20%
GO_REGULATION_OF_TOR_SIGNALING	GO_REGULATION_OF_TOR_SIGNALING		50	0.29182556	1.0210615	0.4086444	0.6841382	1.0	3310	tags=42%, list=26%, signal=57%
GO_CLATHRIN_COAT	GO_CLATHRIN_COAT		37	0.27244437	1.0202748	0.41955194	0.68499964	1.0	4094	tags=41%, list=33%, signal=60%
GO_EMBRYONIC_FORELIMB_MORPHOGENESIS	GO_EMBRYONIC_FORELIMB_MORPHOGENESIS		25	0.3541356	1.0195191	0.44936708	0.6857829	1.0	227	tags=8%, list=2%, signal=8%
GO_MITOCHONDRIAL_RESPIRATORY_CHAIN_COMPLEX_I_BIOGENESIS	GO_MITOCHONDRIAL_RESPIRATORY_CHAIN_COMPLEX_I_BIOGENESIS		39	0.3336598	1.018461	0.4347826	0.68719625	1.0	3761	tags=36%, list=30%, signal=51%
GO_REGULATION_OF_FATTY_ACID_METABOLIC_PROCESS	GO_REGULATION_OF_FATTY_ACID_METABOLIC_PROCESS		68	0.35000455	1.016506	0.4215886	0.69059926	1.0	1815	tags=32%, list=14%, signal=38%
GO_PYRIMIDINE_NUCLEOSIDE_BIOSYNTHETIC_PROCESS	GO_PYRIMIDINE_NUCLEOSIDE_BIOSYNTHETIC_PROCESS		22	0.38759875	1.0160192	0.42650104	0.6908378	1.0	2066	tags=36%, list=16%, signal=43%
GO_PYRIMIDINE_NUCLEOSIDE_METABOLIC_PROCESS	GO_PYRIMIDINE_NUCLEOSIDE_METABOLIC_PROCESS		36	0.3283999	1.015732	0.43220338	0.6905963	1.0	2553	tags=31%, list=20%, signal=38%
GO_PROTEIN_K48_LINKED_UBIQUITINATION	GO_PROTEIN_K48_LINKED_UBIQUITINATION		36	0.3074207	1.0156325	0.44176707	0.6899828	1.0	2078	tags=17%, list=17%, signal=20%
GO_ORGANIC_CYCLIC_COMPOUND_CATABOLIC_PROCESS	GO_ORGANIC_CYCLIC_COMPOUND_CATABOLIC_PROCESS		327	0.25826195	1.0151011	0.4173077	0.69029135	1.0	3768	tags=38%, list=30%, signal=53%
GO_PYRIMIDINE_CONTAINING_COMPOUND_METABOLIC_PROCESS	GO_PYRIMIDINE_CONTAINING_COMPOUND_METABOLIC_PROCESS		58	0.31737226	1.0150604	0.4178499	0.689547	1.0	2553	tags=34%, list=20%, signal=43%
GO_REGULATION_OF_NUCLEASE_ACTIVITY	GO_REGULATION_OF_NUCLEASE_ACTIVITY		20	0.3740714	1.0150429	0.44088176	0.6887591	1.0	3199	tags=45%, list=26%, signal=60%
GO_ESTABLISHMENT_OF_PROTEIN_LOCALIZATION_TO_ORGANELLE	GO_ESTABLISHMENT_OF_PROTEIN_LOCALIZATION_TO_ORGANELLE		286	0.22488181	1.014949	0.41295546	0.6881232	1.0	4117	tags=38%, list=33%, signal=55%
GO_PHOSPHATIDYLCHOLINE_BIOSYNTHETIC_PROCESS	GO_PHOSPHATIDYLCHOLINE_BIOSYNTHETIC_PROCESS		20	0.38328555	1.0140227	0.44025156	0.6893025	1.0	651	tags=15%, list=5%, signal=16%
GO_LARGE_RIBOSOMAL_SUBUNIT	GO_LARGE_RIBOSOMAL_SUBUNIT		62	0.3035729	1.013819	0.44249514	0.68890774	1.0	4748	tags=50%, list=38%, signal=80%
GO_MITOGEN_ACTIVATED_PROTEIN_KINASE_BINDING	GO_MITOGEN_ACTIVATED_PROTEIN_KINASE_BINDING		21	0.3368168	1.0128114	0.44950494	0.69024175	1.0	3282	tags=48%, list=26%, signal=64%
GO_REGULATION_OF_FATTY_ACID_BIOSYNTHETIC_PROCESS	GO_REGULATION_OF_FATTY_ACID_BIOSYNTHETIC_PROCESS		32	0.40354487	1.012779	0.41210938	0.68950176	1.0	835	tags=25%, list=7%, signal=27%
GO_MITOCHONDRIAL_RESPIRATORY_CHAIN_COMPLEX_ASSEMBLY	GO_MITOCHONDRIAL_RESPIRATORY_CHAIN_COMPLEX_ASSEMBLY		45	0.32258314	1.0115322	0.43076923	0.69137347	1.0	3761	tags=38%, list=30%, signal=54%
GO_GLYCOSYL_COMPOUND_METABOLIC_PROCESS	GO_GLYCOSYL_COMPOUND_METABOLIC_PROCESS		295	0.2611934	1.0100638	0.41550696	0.69378436	1.0	2161	tags=20%, list=17%, signal=23%
GO_RESPONSE_TO_RADIATION	GO_RESPONSE_TO_RADIATION		344	0.25072291	1.0099282	0.4344086	0.6932464	1.0	2106	tags=24%, list=17%, signal=28%
GO_PROTEIN_TRANSPORTER_ACTIVITY	GO_PROTEIN_TRANSPORTER_ACTIVITY		79	0.27149415	1.0094806	0.44444445	0.6933521	1.0	3909	tags=46%, list=31%, signal=66%
GO_REGULATION_OF_MRNA_3_END_PROCESSING	GO_REGULATION_OF_MRNA_3_END_PROCESSING		23	0.35246766	1.009461	0.45387453	0.6925633	1.0	567	tags=9%, list=5%, signal=9%
GO_PROTEIN_N_TERMINUS_BINDING	GO_PROTEIN_N_TERMINUS_BINDING		95	0.23789941	1.0092287	0.44558522	0.69225204	1.0	3930	tags=42%, list=31%, signal=61%
GO_NONMOTILE_PRIMARY_CILIUM	GO_NONMOTILE_PRIMARY_CILIUM		103	0.25431386	1.0087767	0.42479676	0.6924135	1.0	2130	tags=18%, list=17%, signal=22%
GO_MITOCHONDRION_MORPHOGENESIS	GO_MITOCHONDRION_MORPHOGENESIS		18	0.3777645	1.0078285	0.45588234	0.693592	1.0	2122	tags=28%, list=17%, signal=33%
GO_STEROL_HOMEOSTASIS	GO_STEROL_HOMEOSTASIS		47	0.4107924	1.007696	0.45920303	0.69302905	1.0	1419	tags=28%, list=11%, signal=31%
GO_REGULATION_OF_PROTEIN_EXPORT_FROM_NUCLEUS	GO_REGULATION_OF_PROTEIN_EXPORT_FROM_NUCLEUS		29	0.36570963	1.0072733	0.43762782	0.6930863	1.0	1824	tags=34%, list=15%, signal=40%
GO_CELLULAR_COMPONENT_DISASSEMBLY	GO_CELLULAR_COMPONENT_DISASSEMBLY		415	0.23738973	1.0068221	0.42827868	0.6932604	1.0	2072	tags=21%, list=17%, signal=25%
GO_SCF_DEPENDENT_PROTEASOMAL_UBIQUITIN_DEPENDENT_PROTEIN_CATABOLIC_PROCESS	GO_SCF_DEPENDENT_PROTEASOMAL_UBIQUITIN_DEPENDENT_PROTEIN_CATABOLIC_PROCESS		18	0.3535677	1.0065972	0.45564517	0.692922	1.0	929	tags=17%, list=7%, signal=18%
GO_ANATOMICAL_STRUCTURE_ARRANGEMENT	GO_ANATOMICAL_STRUCTURE_ARRANGEMENT		15	0.3899589	1.005296	0.47379914	0.694814	1.0	464	tags=13%, list=4%, signal=14%
GO_STRIATED_MUSCLE_CONTRACTION	GO_STRIATED_MUSCLE_CONTRACTION		89	0.27655378	1.004982	0.43991855	0.69468284	1.0	837	tags=10%, list=7%, signal=11%
GO_COENZYME_BIOSYNTHETIC_PROCESS	GO_COENZYME_BIOSYNTHETIC_PROCESS		94	0.33980396	1.0038837	0.4322709	0.6962102	1.0	3352	tags=45%, list=27%, signal=61%
GO_NEURON_NEURON_SYNAPTIC_TRANSMISSION	GO_NEURON_NEURON_SYNAPTIC_TRANSMISSION		51	0.31052667	1.0018643	0.45833334	0.6997429	1.0	1556	tags=16%, list=12%, signal=18%
GO_NEUROTRANSMITTER_TRANSPORTER_ACTIVITY	GO_NEUROTRANSMITTER_TRANSPORTER_ACTIVITY		21	0.41110948	1.0017934	0.44219068	0.6990836	1.0	465	tags=14%, list=4%, signal=15%
GO_ION_ANTIPORTER_ACTIVITY	GO_ION_ANTIPORTER_ACTIVITY		30	0.35758317	1.0009477	0.45	0.70004547	1.0	1364	tags=17%, list=11%, signal=19%
GO_CELLULAR_ALDEHYDE_METABOLIC_PROCESS	GO_CELLULAR_ALDEHYDE_METABOLIC_PROCESS		70	0.38252428	1.0007714	0.438	0.69961625	1.0	3239	tags=49%, list=26%, signal=65%
GO_REGULATION_OF_EPIDERMIS_DEVELOPMENT	GO_REGULATION_OF_EPIDERMIS_DEVELOPMENT		51	0.31806803	1.0005975	0.4396728	0.6992125	1.0	1415	tags=20%, list=11%, signal=22%
GO_ANDROGEN_METABOLIC_PROCESS	GO_ANDROGEN_METABOLIC_PROCESS		29	0.4388016	1.0005126	0.48702595	0.698553	1.0	1604	tags=34%, list=13%, signal=39%
GO_RNA_POLYMERASE_BINDING	GO_RNA_POLYMERASE_BINDING		26	0.35693848	1.0005076	0.4408397	0.6977496	1.0	4963	tags=65%, list=40%, signal=108%
GO_PROTEIN_IMPORT	GO_PROTEIN_IMPORT		134	0.24058165	0.999427	0.43	0.69934297	1.0	4067	tags=43%, list=32%, signal=63%
GO_CARBON_CARBON_LYASE_ACTIVITY	GO_CARBON_CARBON_LYASE_ACTIVITY		38	0.39506108	0.9988865	0.4777328	0.6996394	1.0	1183	tags=16%, list=9%, signal=17%
GO_TOXIN_TRANSPORT	GO_TOXIN_TRANSPORT		30	0.32609677	0.99765664	0.47454175	0.70144355	1.0	753	tags=13%, list=6%, signal=14%
GO_CYTOSKELETON_DEPENDENT_INTRACELLULAR_TRANSPORT	GO_CYTOSKELETON_DEPENDENT_INTRACELLULAR_TRANSPORT		89	0.28150585	0.99631745	0.44869214	0.70355517	1.0	2242	tags=21%, list=18%, signal=26%
GO_TELENCEPHALON_GLIAL_CELL_MIGRATION	GO_TELENCEPHALON_GLIAL_CELL_MIGRATION		17	0.3644838	0.99533886	0.4678715	0.70479447	1.0	2863	tags=35%, list=23%, signal=46%
GO_HORMONE_BIOSYNTHETIC_PROCESS	GO_HORMONE_BIOSYNTHETIC_PROCESS		44	0.38663107	0.9949918	0.48818898	0.7047363	1.0	1765	tags=27%, list=14%, signal=32%
GO_ANION_HOMEOSTASIS	GO_ANION_HOMEOSTASIS		35	0.3880365	0.9946009	0.43712574	0.7047454	1.0	1042	tags=26%, list=8%, signal=28%
GO_SYNAPTIC_TRANSMISSION_GLUTAMATERGIC	GO_SYNAPTIC_TRANSMISSION_GLUTAMATERGIC		19	0.3530349	0.9945914	0.48697394	0.70394915	1.0	1556	tags=21%, list=12%, signal=24%
GO_CELL_DEATH_IN_RESPONSE_TO_OXIDATIVE_STRESS	GO_CELL_DEATH_IN_RESPONSE_TO_OXIDATIVE_STRESS		16	0.41076478	0.9944357	0.46516395	0.70344883	1.0	1913	tags=38%, list=15%, signal=44%
GO_SCF_UBIQUITIN_LIGASE_COMPLEX	GO_SCF_UBIQUITIN_LIGASE_COMPLEX		21	0.3263018	0.9938439	0.46311477	0.7039162	1.0	1406	tags=19%, list=11%, signal=21%
GO_ACYLGLYCEROL_HOMEOSTASIS	GO_ACYLGLYCEROL_HOMEOSTASIS		22	0.44196755	0.99259573	0.47843137	0.7057698	1.0	2117	tags=41%, list=17%, signal=49%
GO_SECONDARY_METABOLITE_BIOSYNTHETIC_PROCESS	GO_SECONDARY_METABOLITE_BIOSYNTHETIC_PROCESS		19	0.4253106	0.99168456	0.47984645	0.7069395	1.0	2329	tags=26%, list=19%, signal=32%
GO_CELLULAR_SENESCENCE	GO_CELLULAR_SENESCENCE		27	0.3274526	0.99060595	0.4702381	0.70841676	1.0	1901	tags=26%, list=15%, signal=30%
GO_REGULATION_OF_PROTEIN_IMPORT_INTO_NUCLEUS_TRANSLOCATION	GO_REGULATION_OF_PROTEIN_IMPORT_INTO_NUCLEUS_TRANSLOCATION		18	0.37834126	0.98898226	0.47412008	0.7110962	1.0	274	tags=17%, list=2%, signal=17%
GO_DICARBOXYLIC_ACID_TRANSMEMBRANE_TRANSPORTER_ACTIVITY	GO_DICARBOXYLIC_ACID_TRANSMEMBRANE_TRANSPORTER_ACTIVITY		25	0.41273808	0.9882465	0.47454175	0.7118569	1.0	1960	tags=36%, list=16%, signal=43%
GO_MITOCHONDRION_ORGANIZATION	GO_MITOCHONDRION_ORGANIZATION		426	0.22709408	0.98758376	0.44970414	0.71247226	1.0	3138	tags=30%, list=25%, signal=38%
GO_POST_TRANSLATIONAL_PROTEIN_MODIFICATION	GO_POST_TRANSLATIONAL_PROTEIN_MODIFICATION		21	0.38655308	0.9871133	0.458159	0.7126454	1.0	933	tags=19%, list=7%, signal=21%
GO_LIMBIC_SYSTEM_DEVELOPMENT	GO_LIMBIC_SYSTEM_DEVELOPMENT		91	0.27659103	0.9863718	0.5041841	0.7134078	1.0	371	tags=9%, list=3%, signal=9%
GO_BETA_CATENIN_DESTRUCTION_COMPLEX_DISASSEMBLY	GO_BETA_CATENIN_DESTRUCTION_COMPLEX_DISASSEMBLY		19	0.3385717	0.98600507	0.4642857	0.7133743	1.0	1775	tags=26%, list=14%, signal=31%
GO_MONOVALENT_INORGANIC_ANION_HOMEOSTASIS	GO_MONOVALENT_INORGANIC_ANION_HOMEOSTASIS		15	0.4246518	0.98515457	0.4798387	0.71430826	1.0	729	tags=27%, list=6%, signal=28%
GO_OXIDOREDUCTASE_ACTIVITY_ACTING_ON_PAIRED_DONORS_WITH_INCORPORATION_OR_REDUCTION_OF_MOLECULAR_OXYGEN_2_OXOGLUTARATE_AS_ONE_DONOR_AND_INCORPORATION_OF_ONE_ATOM_EACH_OF_OXYGEN_INTO_BOTH_DONORS	GO_OXIDOREDUCTASE_ACTIVITY_ACTING_ON_PAIRED_DONORS_WITH_INCORPORATION_OR_REDUCTION_OF_MOLECULAR_OXYGEN_2_OXOGLUTARATE_AS_ONE_DONOR_AND_INCORPORATION_OF_ONE_ATOM_EACH_OF_OXYGEN_INTO_BOTH_DONORS		31	0.31668997	0.9832958	0.48039216	0.7174237	1.0	2186	tags=29%, list=17%, signal=35%
GO_TRANSCRIPTION_ELONGATION_FACTOR_COMPLEX	GO_TRANSCRIPTION_ELONGATION_FACTOR_COMPLEX		35	0.30504143	0.98319167	0.4774951	0.71683323	1.0	4051	tags=40%, list=32%, signal=59%
GO_REGULATION_OF_GLUCONEOGENESIS	GO_REGULATION_OF_GLUCONEOGENESIS		26	0.3799323	0.98112845	0.46242774	0.72046566	1.0	3539	tags=58%, list=28%, signal=80%
GO_LEFT_RIGHT_PATTERN_FORMATION	GO_LEFT_RIGHT_PATTERN_FORMATION		15	0.4191796	0.9793908	0.5030303	0.7232973	1.0	1628	tags=40%, list=13%, signal=46%
GO_PYRIMIDINE_NUCLEOTIDE_BIOSYNTHETIC_PROCESS	GO_PYRIMIDINE_NUCLEOTIDE_BIOSYNTHETIC_PROCESS		21	0.3549517	0.9790906	0.4741036	0.7231239	1.0	2318	tags=38%, list=19%, signal=47%
GO_NUCLEOBASE_METABOLIC_PROCESS	GO_NUCLEOBASE_METABOLIC_PROCESS		31	0.39220008	0.97871387	0.47528517	0.72307634	1.0	2425	tags=48%, list=19%, signal=60%
GO_REGULATION_OF_PLASMA_LIPOPROTEIN_PARTICLE_LEVELS	GO_REGULATION_OF_PLASMA_LIPOPROTEIN_PARTICLE_LEVELS		41	0.4005878	0.9760262	0.48514852	0.7280489	1.0	1042	tags=20%, list=8%, signal=21%
GO_VENTRICULAR_CARDIAC_MUSCLE_CELL_DIFFERENTIATION	GO_VENTRICULAR_CARDIAC_MUSCLE_CELL_DIFFERENTIATION		17	0.3921452	0.97565854	0.4854369	0.7279664	1.0	45	tags=12%, list=0%, signal=12%
GO_REGULATION_OF_RHODOPSIN_MEDIATED_SIGNALING_PATHWAY	GO_REGULATION_OF_RHODOPSIN_MEDIATED_SIGNALING_PATHWAY		23	0.30806202	0.97550935	0.49312377	0.7274784	1.0	2054	tags=17%, list=16%, signal=21%
GO_NEGATIVE_REGULATION_OF_NOTCH_SIGNALING_PATHWAY	GO_NEGATIVE_REGULATION_OF_NOTCH_SIGNALING_PATHWAY		21	0.35950786	0.97476804	0.486	0.7281312	1.0	647	tags=19%, list=5%, signal=20%
GO_CILIUM_MORPHOGENESIS	GO_CILIUM_MORPHOGENESIS		129	0.24864845	0.9745752	0.48262548	0.7277105	1.0	3373	tags=32%, list=27%, signal=43%
GO_GLYOXYLATE_METABOLIC_PROCESS	GO_GLYOXYLATE_METABOLIC_PROCESS		24	0.44708246	0.97444373	0.49031007	0.7271763	1.0	3160	tags=50%, list=25%, signal=67%
GO_GLUTAMATE_RECEPTOR_ACTIVITY	GO_GLUTAMATE_RECEPTOR_ACTIVITY		23	0.3473983	0.9732775	0.50793654	0.72885484	1.0	557	tags=9%, list=4%, signal=9%
GO_AMINO_ACID_BINDING	GO_AMINO_ACID_BINDING		85	0.33064246	0.9718589	0.49896908	0.731111	1.0	1769	tags=24%, list=14%, signal=27%
GO_CARBOXY_TERMINAL_DOMAIN_PROTEIN_KINASE_COMPLEX	GO_CARBOXY_TERMINAL_DOMAIN_PROTEIN_KINASE_COMPLEX		21	0.36493492	0.9710005	0.48046875	0.7321601	1.0	2826	tags=33%, list=23%, signal=43%
GO_ACETYL_COA_METABOLIC_PROCESS	GO_ACETYL_COA_METABOLIC_PROCESS		20	0.42024148	0.96972305	0.4951267	0.7340688	1.0	3160	tags=55%, list=25%, signal=73%
GO_REGULATION_OF_INTRACELLULAR_STEROID_HORMONE_RECEPTOR_SIGNALING_PATHWAY	GO_REGULATION_OF_INTRACELLULAR_STEROID_HORMONE_RECEPTOR_SIGNALING_PATHWAY		49	0.26185888	0.96922046	0.5	0.7344043	1.0	1574	tags=16%, list=13%, signal=19%
GO_REGULATION_OF_PROTEIN_TARGETING_TO_MITOCHONDRION	GO_REGULATION_OF_PROTEIN_TARGETING_TO_MITOCHONDRION		69	0.24939322	0.96816075	0.5233463	0.7358793	1.0	3283	tags=38%, list=26%, signal=51%
GO_ORGANOPHOSPHATE_BIOSYNTHETIC_PROCESS	GO_ORGANOPHOSPHATE_BIOSYNTHETIC_PROCESS		354	0.23356071	0.9667737	0.5154004	0.73806316	1.0	2553	tags=26%, list=20%, signal=31%
GO_NUCLEOSIDE_TRIPHOSPHATE_METABOLIC_PROCESS	GO_NUCLEOSIDE_TRIPHOSPHATE_METABOLIC_PROCESS		179	0.24547686	0.9646742	0.45588234	0.7417257	1.0	3104	tags=27%, list=25%, signal=35%
GO_LIPOSACCHARIDE_METABOLIC_PROCESS	GO_LIPOSACCHARIDE_METABOLIC_PROCESS		83	0.27238253	0.96465325	0.50695825	0.74095	1.0	2120	tags=25%, list=17%, signal=30%
GO_MITOCHONDRION_LOCALIZATION	GO_MITOCHONDRION_LOCALIZATION		27	0.27083522	0.9638285	0.502947	0.74188817	1.0	2230	tags=30%, list=18%, signal=36%
GO_LIPID_STORAGE	GO_LIPID_STORAGE		21	0.35558957	0.96330583	0.49166667	0.74224675	1.0	3503	tags=48%, list=28%, signal=66%
GO_SULFUR_AMINO_ACID_METABOLIC_PROCESS	GO_SULFUR_AMINO_ACID_METABOLIC_PROCESS		37	0.39180276	0.96276754	0.5259117	0.74252963	1.0	2476	tags=27%, list=20%, signal=34%
GO_POSITIVE_REGULATION_OF_PROTEIN_ACETYLATION	GO_POSITIVE_REGULATION_OF_PROTEIN_ACETYLATION		35	0.2990319	0.96244943	0.50206614	0.7423918	1.0	2183	tags=34%, list=17%, signal=41%
GO_FOLIC_ACID_CONTAINING_COMPOUND_METABOLIC_PROCESS	GO_FOLIC_ACID_CONTAINING_COMPOUND_METABOLIC_PROCESS		23	0.39535928	0.96141136	0.50511247	0.743781	1.0	1936	tags=30%, list=15%, signal=36%
GO_PHOTORECEPTOR_INNER_SEGMENT	GO_PHOTORECEPTOR_INNER_SEGMENT		31	0.33247954	0.9613633	0.51975054	0.74307144	1.0	952	tags=13%, list=8%, signal=14%
GO_CILIARY_PART	GO_CILIARY_PART		192	0.22575133	0.96054655	0.5155642	0.74396586	1.0	2296	tags=17%, list=18%, signal=21%
GO_PYRIMIDINE_CONTAINING_COMPOUND_BIOSYNTHETIC_PROCESS	GO_PYRIMIDINE_CONTAINING_COMPOUND_BIOSYNTHETIC_PROCESS		31	0.34142706	0.96014506	0.50211865	0.7439704	1.0	2553	tags=39%, list=20%, signal=48%
GO_COFACTOR_TRANSPORT	GO_COFACTOR_TRANSPORT		21	0.38045815	0.9588629	0.52761906	0.7458418	1.0	2248	tags=43%, list=18%, signal=52%
GO_FORELIMB_MORPHOGENESIS	GO_FORELIMB_MORPHOGENESIS		30	0.33290645	0.9579453	0.5138593	0.7469911	1.0	227	tags=7%, list=2%, signal=7%
GO_NEGATIVE_REGULATION_OF_CARBOHYDRATE_METABOLIC_PROCESS	GO_NEGATIVE_REGULATION_OF_CARBOHYDRATE_METABOLIC_PROCESS		37	0.30570605	0.9574635	0.5298969	0.7472244	1.0	2435	tags=30%, list=19%, signal=37%
GO_PROTEIN_LOCALIZATION_TO_NUCLEUS	GO_PROTEIN_LOCALIZATION_TO_NUCLEUS		139	0.22875595	0.9564453	0.525355	0.74857	1.0	1501	tags=17%, list=12%, signal=19%
GO_BRUSH_BORDER	GO_BRUSH_BORDER		91	0.3003924	0.95593	0.5154004	0.74882346	1.0	2130	tags=24%, list=17%, signal=29%
GO_DRUG_BINDING	GO_DRUG_BINDING		97	0.27345476	0.95581675	0.51759833	0.7482377	1.0	1207	tags=16%, list=10%, signal=18%
GO_POTASSIUM_ION_HOMEOSTASIS	GO_POTASSIUM_ION_HOMEOSTASIS		15	0.38690668	0.95555	0.52556235	0.7479987	1.0	55	tags=7%, list=0%, signal=7%
GO_HEXOSE_CATABOLIC_PROCESS	GO_HEXOSE_CATABOLIC_PROCESS		44	0.3286505	0.9527154	0.52263373	0.75320774	1.0	1503	tags=23%, list=12%, signal=26%
GO_FORMATION_OF_TRANSLATION_PREINITIATION_COMPLEX	GO_FORMATION_OF_TRANSLATION_PREINITIATION_COMPLEX		18	0.39794943	0.951827	0.5146199	0.75426006	1.0	5489	tags=67%, list=44%, signal=118%
GO_PALLIUM_DEVELOPMENT	GO_PALLIUM_DEVELOPMENT		134	0.2601676	0.9512987	0.5414938	0.7545767	1.0	464	tags=10%, list=4%, signal=10%
GO_CARBOHYDRATE_CATABOLIC_PROCESS	GO_CARBOHYDRATE_CATABOLIC_PROCESS		95	0.30297223	0.95037025	0.523614	0.75582254	1.0	2126	tags=24%, list=17%, signal=29%
GO_PROTEIN_CATABOLIC_PROCESS	GO_PROTEIN_CATABOLIC_PROCESS		421	0.2344193	0.9483911	0.51527494	0.75931716	1.0	2856	tags=23%, list=23%, signal=28%
GO_PHOSPHATASE_BINDING	GO_PHOSPHATASE_BINDING		137	0.22492437	0.94685894	0.5674603	0.7617364	1.0	4129	tags=41%, list=33%, signal=60%
GO_DICARBOXYLIC_ACID_TRANSPORT	GO_DICARBOXYLIC_ACID_TRANSPORT		61	0.29287708	0.946584	0.5644172	0.76148075	1.0	2067	tags=23%, list=16%, signal=27%
GO_ORGANELLE_TRANSPORT_ALONG_MICROTUBULE	GO_ORGANELLE_TRANSPORT_ALONG_MICROTUBULE		44	0.28369763	0.9455224	0.5258799	0.7629186	1.0	2242	tags=23%, list=18%, signal=28%
GO_PHOSPHATIDYLINOSITOL_BISPHOSPHATE_BINDING	GO_PHOSPHATIDYLINOSITOL_BISPHOSPHATE_BINDING		52	0.27917123	0.9451672	0.57995737	0.7628544	1.0	363	tags=6%, list=3%, signal=6%
GO_S_ADENOSYLMETHIONINE_METABOLIC_PROCESS	GO_S_ADENOSYLMETHIONINE_METABOLIC_PROCESS		17	0.4277406	0.94508874	0.5486381	0.7622138	1.0	873	tags=18%, list=7%, signal=19%
GO_CELLULAR_RESPONSE_TO_INSULIN_STIMULUS	GO_CELLULAR_RESPONSE_TO_INSULIN_STIMULUS		125	0.25087577	0.94435483	0.58964145	0.7629409	1.0	1818	tags=22%, list=15%, signal=25%
GO_MITOCHONDRIAL_ENVELOPE	GO_MITOCHONDRIAL_ENVELOPE		478	0.23818444	0.9441464	0.50392157	0.7625355	1.0	3837	tags=40%, list=31%, signal=55%
GO_POSITIVE_REGULATION_OF_RNA_SPLICING	GO_POSITIVE_REGULATION_OF_RNA_SPLICING		15	0.31042734	0.9435172	0.4970646	0.7630155	1.0	4495	tags=60%, list=36%, signal=93%
GO_HIPPOCAMPUS_DEVELOPMENT	GO_HIPPOCAMPUS_DEVELOPMENT		67	0.28000006	0.94214684	0.54584223	0.7652192	1.0	371	tags=9%, list=3%, signal=9%
GO_CILIARY_TIP	GO_CILIARY_TIP		30	0.30530483	0.9411999	0.54285717	0.7664565	1.0	2511	tags=30%, list=20%, signal=37%
GO_CELLULAR_PROTEIN_COMPLEX_ASSEMBLY	GO_CELLULAR_PROTEIN_COMPLEX_ASSEMBLY		262	0.22021168	0.94108254	0.55918366	0.76587784	1.0	2241	tags=21%, list=18%, signal=25%
GO_ADENYLYLTRANSFERASE_ACTIVITY	GO_ADENYLYLTRANSFERASE_ACTIVITY		19	0.3521241	0.9397973	0.52409637	0.7678158	1.0	4251	tags=58%, list=34%, signal=87%
GO_PURINE_NUCLEOBASE_METABOLIC_PROCESS	GO_PURINE_NUCLEOBASE_METABOLIC_PROCESS		17	0.40565696	0.9397178	0.550813	0.76715004	1.0	2381	tags=53%, list=19%, signal=65%
GO_AMINO_ACID_TRANSMEMBRANE_TRANSPORTER_ACTIVITY	GO_AMINO_ACID_TRANSMEMBRANE_TRANSPORTER_ACTIVITY		58	0.32603148	0.93874514	0.5564682	0.7684144	1.0	2343	tags=31%, list=19%, signal=38%
GO_DNA_BINDING_BENDING	GO_DNA_BINDING_BENDING		18	0.371638	0.9386772	0.5329341	0.76775247	1.0	823	tags=11%, list=7%, signal=12%
GO_LIPID_OXIDATION	GO_LIPID_OXIDATION		61	0.39205378	0.93859446	0.5257937	0.76710665	1.0	3570	tags=43%, list=28%, signal=59%
GO_SPERMATID_DIFFERENTIATION	GO_SPERMATID_DIFFERENTIATION		79	0.24882622	0.93798083	0.5397149	0.76756924	1.0	1605	tags=15%, list=13%, signal=17%
GO_DEPHOSPHORYLATION	GO_DEPHOSPHORYLATION		219	0.23862132	0.93785137	0.56774193	0.767043	1.0	892	tags=10%, list=7%, signal=11%
GO_ALDITOL_METABOLIC_PROCESS	GO_ALDITOL_METABOLIC_PROCESS		16	0.44590765	0.9374918	0.55876684	0.7669895	1.0	1742	tags=38%, list=14%, signal=44%
GO_IMMUNOGLOBULIN_PRODUCTION_INVOLVED_IN_IMMUNOGLOBULIN_MEDIATED_IMMUNE_RESPONSE	GO_IMMUNOGLOBULIN_PRODUCTION_INVOLVED_IN_IMMUNOGLOBULIN_MEDIATED_IMMUNE_RESPONSE		17	0.39012197	0.937385	0.53815264	0.766378	1.0	2077	tags=29%, list=17%, signal=35%
GO_INORGANIC_ANION_TRANSPORT	GO_INORGANIC_ANION_TRANSPORT		98	0.26193708	0.93565637	0.57988167	0.7692198	1.0	729	tags=9%, list=6%, signal=10%
GO_INSULIN_RECEPTOR_SIGNALING_PATHWAY	GO_INSULIN_RECEPTOR_SIGNALING_PATHWAY		69	0.2535448	0.93492657	0.5390625	0.76999855	1.0	1818	tags=20%, list=15%, signal=24%
GO_AMINO_ACID_TRANSMEMBRANE_TRANSPORT	GO_AMINO_ACID_TRANSMEMBRANE_TRANSPORT		46	0.3480617	0.9349002	0.60655737	0.76923627	1.0	2343	tags=35%, list=19%, signal=43%
GO_MONOCARBOXYLIC_ACID_TRANSPORT	GO_MONOCARBOXYLIC_ACID_TRANSPORT		92	0.35994706	0.934657	0.55578095	0.76894546	1.0	1110	tags=22%, list=9%, signal=24%
GO_DETECTION_OF_VISIBLE_LIGHT	GO_DETECTION_OF_VISIBLE_LIGHT		31	0.30238405	0.93412304	0.5458248	0.769323	1.0	483	tags=6%, list=4%, signal=7%
GO_NUCLEOSIDE_PHOSPHATE_CATABOLIC_PROCESS	GO_NUCLEOSIDE_PHOSPHATE_CATABOLIC_PROCESS		54	0.2682483	0.93379897	0.5691057	0.7692561	1.0	3697	tags=43%, list=30%, signal=60%
GO_UBIQUITIN_LIKE_PROTEIN_TRANSFERASE_ACTIVITY	GO_UBIQUITIN_LIKE_PROTEIN_TRANSFERASE_ACTIVITY		280	0.23236495	0.9335387	0.54059404	0.7690319	1.0	3551	tags=32%, list=28%, signal=43%
GO_CELLULAR_RESPONSE_TO_ESTROGEN_STIMULUS	GO_CELLULAR_RESPONSE_TO_ESTROGEN_STIMULUS		35	0.32525644	0.9321561	0.5478615	0.77109677	1.0	1481	tags=23%, list=12%, signal=26%
GO_SNRNA_BINDING	GO_SNRNA_BINDING		27	0.32996637	0.93205345	0.5318725	0.77047855	1.0	3356	tags=48%, list=27%, signal=66%
GO_ADULT_LOCOMOTORY_BEHAVIOR	GO_ADULT_LOCOMOTORY_BEHAVIOR		69	0.2575579	0.931848	0.6052104	0.7700857	1.0	2200	tags=22%, list=18%, signal=26%
GO_AMINO_ACID_TRANSPORT	GO_AMINO_ACID_TRANSPORT		99	0.28348765	0.9311597	0.6315789	0.77072966	1.0	2803	tags=30%, list=22%, signal=39%
GO_GTPASE_BINDING	GO_GTPASE_BINDING		223	0.21732153	0.9311587	0.61257607	0.76991886	1.0	2831	tags=25%, list=23%, signal=32%
GO_NUCLEAR_HETEROCHROMATIN	GO_NUCLEAR_HETEROCHROMATIN		23	0.3330131	0.93094736	0.5366876	0.7695534	1.0	4272	tags=65%, list=34%, signal=99%
GO_REGULATION_OF_EPIDERMAL_CELL_DIFFERENTIATION	GO_REGULATION_OF_EPIDERMAL_CELL_DIFFERENTIATION		36	0.32721847	0.92940104	0.5523012	0.7720313	1.0	1415	tags=22%, list=11%, signal=25%
GO_ADP_BINDING	GO_ADP_BINDING		31	0.30226687	0.92846966	0.5761079	0.77321786	1.0	2476	tags=32%, list=20%, signal=40%
GO_PROTEIN_C_TERMINUS_BINDING	GO_PROTEIN_C_TERMINUS_BINDING		163	0.23420672	0.9282735	0.5813008	0.77281684	1.0	1701	tags=15%, list=14%, signal=17%
GO_FATTY_ACID_CATABOLIC_PROCESS	GO_FATTY_ACID_CATABOLIC_PROCESS		62	0.4047947	0.9281075	0.5346154	0.7723678	1.0	3570	tags=44%, list=28%, signal=61%
GO_GLUTATHIONE_DERIVATIVE_METABOLIC_PROCESS	GO_GLUTATHIONE_DERIVATIVE_METABOLIC_PROCESS		18	0.46075815	0.9252011	0.5671937	0.7776154	1.0	886	tags=22%, list=7%, signal=24%
GO_PHOTORECEPTOR_CELL_MAINTENANCE	GO_PHOTORECEPTOR_CELL_MAINTENANCE		22	0.3249618	0.9246763	0.57831323	0.7779028	1.0	2130	tags=27%, list=17%, signal=33%
GO_PRIMARY_CILIUM	GO_PRIMARY_CILIUM		144	0.21956432	0.9240381	0.54268295	0.7784396	1.0	2242	tags=17%, list=18%, signal=21%
GO_NEGATIVE_REGULATION_OF_LYMPHOCYTE_APOPTOTIC_PROCESS	GO_NEGATIVE_REGULATION_OF_LYMPHOCYTE_APOPTOTIC_PROCESS		21	0.3683792	0.9231848	0.58181816	0.7793992	1.0	1527	tags=33%, list=12%, signal=38%
GO_CELLULAR_RESPONSE_TO_REACTIVE_NITROGEN_SPECIES	GO_CELLULAR_RESPONSE_TO_REACTIVE_NITROGEN_SPECIES		19	0.36686566	0.92279184	0.595092	0.779385	1.0	135	tags=11%, list=1%, signal=11%
GO_ORGANELLAR_LARGE_RIBOSOMAL_SUBUNIT	GO_ORGANELLAR_LARGE_RIBOSOMAL_SUBUNIT		19	0.3687543	0.9220342	0.5619048	0.780153	1.0	3496	tags=42%, list=28%, signal=58%
GO_PROTEIN_TYROSINE_PHOSPHATASE_ACTIVITY	GO_PROTEIN_TYROSINE_PHOSPHATASE_ACTIVITY		83	0.26790482	0.9204912	0.59912854	0.78254366	1.0	892	tags=12%, list=7%, signal=13%
GO_NUCLEAR_TRANSCRIBED_MRNA_POLY_A_TAIL_SHORTENING	GO_NUCLEAR_TRANSCRIBED_MRNA_POLY_A_TAIL_SHORTENING		18	0.31699207	0.9203584	0.54	0.78199863	1.0	3215	tags=33%, list=26%, signal=45%
GO_NEUROTRANSMITTER_TRANSPORT	GO_NEUROTRANSMITTER_TRANSPORT		116	0.2516717	0.9195048	0.611691	0.7830176	1.0	930	tags=10%, list=7%, signal=11%
GO_CELLULAR_RESPONSE_TO_FATTY_ACID	GO_CELLULAR_RESPONSE_TO_FATTY_ACID		45	0.31510267	0.9194861	0.5920502	0.7822447	1.0	2129	tags=33%, list=17%, signal=40%
GO_SMALL_MOLECULE_BIOSYNTHETIC_PROCESS	GO_SMALL_MOLECULE_BIOSYNTHETIC_PROCESS		363	0.30341482	0.9191962	0.5668663	0.78204614	1.0	1702	tags=24%, list=14%, signal=27%
GO_CELLULAR_SODIUM_ION_HOMEOSTASIS	GO_CELLULAR_SODIUM_ION_HOMEOSTASIS		15	0.36534742	0.9179879	0.5676768	0.7838622	1.0	799	tags=20%, list=6%, signal=21%
GO_RNA_PHOSPHODIESTER_BOND_HYDROLYSIS_EXONUCLEOLYTIC	GO_RNA_PHOSPHODIESTER_BOND_HYDROLYSIS_EXONUCLEOLYTIC		25	0.30676016	0.917327	0.5580524	0.78448373	1.0	3502	tags=48%, list=28%, signal=66%
GO_POSTTRANSCRIPTIONAL_REGULATION_OF_GENE_EXPRESSION	GO_POSTTRANSCRIPTIONAL_REGULATION_OF_GENE_EXPRESSION		348	0.209482	0.91725475	0.55424064	0.78381306	1.0	3221	tags=30%, list=26%, signal=40%
GO_NEGATIVE_REGULATION_OF_PROTEIN_BINDING	GO_NEGATIVE_REGULATION_OF_PROTEIN_BINDING		69	0.24843599	0.91721255	0.6168033	0.78308153	1.0	2670	tags=33%, list=21%, signal=42%
GO_INTRACELLULAR_LIPID_TRANSPORT	GO_INTRACELLULAR_LIPID_TRANSPORT		16	0.36781776	0.9154348	0.55888224	0.7860206	1.0	1666	tags=31%, list=13%, signal=36%
GO_EYE_PHOTORECEPTOR_CELL_DEVELOPMENT	GO_EYE_PHOTORECEPTOR_CELL_DEVELOPMENT		24	0.2967101	0.9146659	0.584	0.7868591	1.0	821	tags=13%, list=7%, signal=13%
GO_PROTEIN_DEPHOSPHORYLATION	GO_PROTEIN_DEPHOSPHORYLATION		147	0.24259521	0.9145974	0.6059957	0.78619355	1.0	892	tags=10%, list=7%, signal=11%
GO_ORGANIC_ACID_TRANSPORT	GO_ORGANIC_ACID_TRANSPORT		198	0.30072743	0.9127092	0.6124498	0.7893589	1.0	2379	tags=27%, list=19%, signal=33%
GO_UBIQUITIN_LIKE_PROTEIN_LIGASE_BINDING	GO_UBIQUITIN_LIKE_PROTEIN_LIGASE_BINDING		226	0.20868991	0.91215044	0.6	0.7896798	1.0	2848	tags=24%, list=23%, signal=30%
GO_NUCLEAR_OUTER_MEMBRANE	GO_NUCLEAR_OUTER_MEMBRANE		17	0.31866404	0.9118712	0.54851484	0.7894621	1.0	1434	tags=24%, list=11%, signal=27%
GO_POLY_PURINE_TRACT_BINDING	GO_POLY_PURINE_TRACT_BINDING		15	0.33735317	0.9116329	0.56969696	0.78915954	1.0	3528	tags=40%, list=28%, signal=56%
GO_TRANSCRIPTION_INITIATION_FROM_RNA_POLYMERASE_II_PROMOTER	GO_TRANSCRIPTION_INITIATION_FROM_RNA_POLYMERASE_II_PROMOTER		139	0.2246874	0.91152114	0.6114398	0.78858006	1.0	2460	tags=27%, list=20%, signal=34%
GO_CARBOHYDRATE_PHOSPHORYLATION	GO_CARBOHYDRATE_PHOSPHORYLATION		20	0.37157506	0.9111649	0.6091476	0.78853047	1.0	1063	tags=25%, list=8%, signal=27%
GO_REGULATION_OF_ORGANELLE_ASSEMBLY	GO_REGULATION_OF_ORGANELLE_ASSEMBLY		117	0.21602133	0.9111522	0.58483034	0.78774655	1.0	1706	tags=15%, list=14%, signal=17%
GO_GMP_METABOLIC_PROCESS	GO_GMP_METABOLIC_PROCESS		17	0.2799684	0.90992147	0.56308854	0.78955203	1.0	3213	tags=29%, list=26%, signal=40%
GO_RHO_GTPASE_BINDING	GO_RHO_GTPASE_BINDING		59	0.26902652	0.9097622	0.5590062	0.78906924	1.0	930	tags=12%, list=7%, signal=13%
GO_MITOCHONDRIAL_PROTEIN_COMPLEX	GO_MITOCHONDRIAL_PROTEIN_COMPLEX		102	0.2593393	0.90968806	0.525355	0.7884072	1.0	4541	tags=44%, list=36%, signal=69%
GO_POSITIVE_REGULATION_OF_CATABOLIC_PROCESS	GO_POSITIVE_REGULATION_OF_CATABOLIC_PROCESS		329	0.22188905	0.9093552	0.6293279	0.78832996	1.0	1141	tags=10%, list=9%, signal=10%
GO_SUBSTANTIA_NIGRA_DEVELOPMENT	GO_SUBSTANTIA_NIGRA_DEVELOPMENT		37	0.2569945	0.9087947	0.5758197	0.7887281	1.0	2563	tags=22%, list=20%, signal=27%
GO_IMMUNOGLOBULIN_PRODUCTION	GO_IMMUNOGLOBULIN_PRODUCTION		35	0.3331686	0.90861523	0.59704643	0.7883026	1.0	2077	tags=29%, list=17%, signal=34%
GO_NUCLEAR_TRANSCRIPTIONAL_REPRESSOR_COMPLEX	GO_NUCLEAR_TRANSCRIPTIONAL_REPRESSOR_COMPLEX		17	0.32994252	0.9077259	0.58	0.7893952	1.0	4350	tags=53%, list=35%, signal=81%
GO_ANION_CATION_SYMPORTER_ACTIVITY	GO_ANION_CATION_SYMPORTER_ACTIVITY		46	0.3660094	0.90721077	0.60649085	0.78970665	1.0	627	tags=15%, list=5%, signal=16%
GO_GTP_DEPENDENT_PROTEIN_BINDING	GO_GTP_DEPENDENT_PROTEIN_BINDING		16	0.32713532	0.9067805	0.5633803	0.7898003	1.0	4083	tags=50%, list=33%, signal=74%
GO_CYTOPLASMIC_TRANSLATION	GO_CYTOPLASMIC_TRANSLATION		35	0.3159627	0.9053894	0.54	0.79196227	1.0	5001	tags=63%, list=40%, signal=104%
GO_NEURAL_PRECURSOR_CELL_PROLIFERATION	GO_NEURAL_PRECURSOR_CELL_PROLIFERATION		56	0.2944375	0.9052382	0.626327	0.7914655	1.0	76	tags=7%, list=1%, signal=7%
GO_VENTRICULAR_SYSTEM_DEVELOPMENT	GO_VENTRICULAR_SYSTEM_DEVELOPMENT		17	0.33347887	0.9051421	0.6140725	0.7908769	1.0	2509	tags=35%, list=20%, signal=44%
GO_HYDROLASE_ACTIVITY_ACTING_ON_GLYCOSYL_BONDS	GO_HYDROLASE_ACTIVITY_ACTING_ON_GLYCOSYL_BONDS		83	0.2791218	0.9050135	0.6045082	0.79033005	1.0	3237	tags=36%, list=26%, signal=48%
GO_VESICLE_LOCALIZATION	GO_VESICLE_LOCALIZATION		170	0.21431617	0.90498567	0.6390042	0.78959936	1.0	2913	tags=26%, list=23%, signal=33%
GO_MRNA_3_UTR_BINDING	GO_MRNA_3_UTR_BINDING		39	0.26073983	0.9041701	0.5772201	0.7904887	1.0	3562	tags=36%, list=28%, signal=50%
GO_ANTERIOR_POSTERIOR_AXIS_SPECIFICATION	GO_ANTERIOR_POSTERIOR_AXIS_SPECIFICATION		37	0.29696047	0.9041349	0.6640471	0.78978014	1.0	485	tags=14%, list=4%, signal=14%
GO_PHOTORECEPTOR_CELL_DEVELOPMENT	GO_PHOTORECEPTOR_CELL_DEVELOPMENT		31	0.26760772	0.90283567	0.592	0.7917301	1.0	821	tags=10%, list=7%, signal=10%
GO_REGULATION_OF_GLUCOSE_IMPORT	GO_REGULATION_OF_GLUCOSE_IMPORT		52	0.28912285	0.9018736	0.63706565	0.7929208	1.0	1010	tags=15%, list=8%, signal=17%
GO_GLYCEROLIPID_BIOSYNTHETIC_PROCESS	GO_GLYCEROLIPID_BIOSYNTHETIC_PROCESS		169	0.21876042	0.9011938	0.70542634	0.7935735	1.0	1993	tags=20%, list=16%, signal=23%
GO_ACTIN_MYOSIN_FILAMENT_SLIDING	GO_ACTIN_MYOSIN_FILAMENT_SLIDING		38	0.28500196	0.900528	0.6206226	0.79415673	1.0	68	tags=5%, list=1%, signal=5%
GO_TRANSCRIPTION_COACTIVATOR_ACTIVITY	GO_TRANSCRIPTION_COACTIVATOR_ACTIVITY		254	0.20862508	0.9003993	0.6102041	0.79363114	1.0	2125	tags=22%, list=17%, signal=26%
GO_ACTIVE_ION_TRANSMEMBRANE_TRANSPORTER_ACTIVITY	GO_ACTIVE_ION_TRANSMEMBRANE_TRANSPORTER_ACTIVITY		135	0.2633584	0.89881533	0.63419485	0.79608023	1.0	627	tags=10%, list=5%, signal=10%
GO_REGULATION_OF_TELOMERASE_ACTIVITY	GO_REGULATION_OF_TELOMERASE_ACTIVITY		34	0.3110648	0.8982543	0.56762296	0.7964549	1.0	2917	tags=41%, list=23%, signal=54%
GO_CELLULAR_HORMONE_METABOLIC_PROCESS	GO_CELLULAR_HORMONE_METABOLIC_PROCESS		78	0.34557456	0.8977565	0.6132265	0.79667544	1.0	1842	tags=26%, list=15%, signal=30%
GO_REGULATION_OF_ESTABLISHMENT_OF_PROTEIN_LOCALIZATION_TO_MITOCHONDRION	GO_REGULATION_OF_ESTABLISHMENT_OF_PROTEIN_LOCALIZATION_TO_MITOCHONDRION		95	0.23234004	0.89714724	0.651341	0.79715425	1.0	3161	tags=37%, list=25%, signal=49%
GO_TRANSLATION_FACTOR_ACTIVITY_RNA_BINDING	GO_TRANSLATION_FACTOR_ACTIVITY_RNA_BINDING		66	0.27775714	0.8971401	0.55688626	0.7963768	1.0	3544	tags=32%, list=28%, signal=44%
GO_ESTROGEN_METABOLIC_PROCESS	GO_ESTROGEN_METABOLIC_PROCESS		20	0.36840245	0.89706254	0.6178862	0.79574585	1.0	1765	tags=30%, list=14%, signal=35%
GO_FATTY_ACID_BETA_OXIDATION_USING_ACYL_COA_DEHYDROGENASE	GO_FATTY_ACID_BETA_OXIDATION_USING_ACYL_COA_DEHYDROGENASE		16	0.47489876	0.8969386	0.6108949	0.7952112	1.0	2327	tags=31%, list=19%, signal=38%
GO_TRANSCRIPTIONAL_REPRESSOR_COMPLEX	GO_TRANSCRIPTIONAL_REPRESSOR_COMPLEX		59	0.25808436	0.8964762	0.6286837	0.7953665	1.0	3657	tags=36%, list=29%, signal=50%
GO_POSITIVE_REGULATION_OF_EPIDERMIS_DEVELOPMENT	GO_POSITIVE_REGULATION_OF_EPIDERMIS_DEVELOPMENT		27	0.33139566	0.8960658	0.62781185	0.7954389	1.0	1415	tags=22%, list=11%, signal=25%
GO_CYTOPLASMIC_MRNA_PROCESSING_BODY	GO_CYTOPLASMIC_MRNA_PROCESSING_BODY		46	0.25456622	0.8958738	0.55078125	0.79502124	1.0	3667	tags=35%, list=29%, signal=49%
GO_POSITIVE_REGULATION_OF_CYCLIN_DEPENDENT_PROTEIN_KINASE_ACTIVITY	GO_POSITIVE_REGULATION_OF_CYCLIN_DEPENDENT_PROTEIN_KINASE_ACTIVITY		26	0.302622	0.89575523	0.6045082	0.7944806	1.0	469	tags=8%, list=4%, signal=8%
GO_ANTIPORTER_ACTIVITY	GO_ANTIPORTER_ACTIVITY		49	0.2905725	0.895736	0.6404959	0.7937392	1.0	2235	tags=20%, list=18%, signal=25%
GO_BASAL_TRANSCRIPTION_MACHINERY_BINDING	GO_BASAL_TRANSCRIPTION_MACHINERY_BINDING		18	0.36026877	0.895623	0.5708583	0.7931678	1.0	2183	tags=33%, list=17%, signal=40%
GO_RESPONSE_TO_IONIZING_RADIATION	GO_RESPONSE_TO_IONIZING_RADIATION		122	0.27277288	0.89502764	0.6666667	0.7935687	1.0	2383	tags=33%, list=19%, signal=40%
GO_REGULATION_OF_TRANSCRIPTION_INITIATION_FROM_RNA_POLYMERASE_II_PROMOTER	GO_REGULATION_OF_TRANSCRIPTION_INITIATION_FROM_RNA_POLYMERASE_II_PROMOTER		23	0.25468996	0.8934751	0.612	0.79604816	1.0	3515	tags=43%, list=28%, signal=60%
GO_NUCLEOBASE_CONTAINING_SMALL_MOLECULE_METABOLIC_PROCESS	GO_NUCLEOBASE_CONTAINING_SMALL_MOLECULE_METABOLIC_PROCESS		426	0.23335679	0.893395	0.6376812	0.7954433	1.0	2381	tags=22%, list=19%, signal=26%
GO_PHOSPHOLIPID_BIOSYNTHETIC_PROCESS	GO_PHOSPHOLIPID_BIOSYNTHETIC_PROCESS		186	0.20909363	0.89284396	0.71875	0.79578865	1.0	2726	tags=25%, list=22%, signal=32%
GO_LYSOSOMAL_TRANSPORT	GO_LYSOSOMAL_TRANSPORT		55	0.24985623	0.89281875	0.6047904	0.7950678	1.0	2389	tags=20%, list=19%, signal=25%
GO_NUCLEOSIDE_DIPHOSPHATE_METABOLIC_PROCESS	GO_NUCLEOSIDE_DIPHOSPHATE_METABOLIC_PROCESS		65	0.27460814	0.8917144	0.64069265	0.7965353	1.0	1508	tags=15%, list=12%, signal=17%
GO_GLANDULAR_EPITHELIAL_CELL_DEVELOPMENT	GO_GLANDULAR_EPITHELIAL_CELL_DEVELOPMENT		16	0.35568285	0.8908457	0.6207585	0.79757905	1.0	1359	tags=19%, list=11%, signal=21%
GO_NUCLEUS_LOCALIZATION	GO_NUCLEUS_LOCALIZATION		15	0.29913533	0.8902588	0.61142856	0.79798037	1.0	3462	tags=33%, list=28%, signal=46%
GO_CYTOSOLIC_SMALL_RIBOSOMAL_SUBUNIT	GO_CYTOSOLIC_SMALL_RIBOSOMAL_SUBUNIT		33	0.31607765	0.88977116	0.58433735	0.79821277	1.0	4601	tags=55%, list=37%, signal=86%
GO_ANION_TRANSMEMBRANE_TRANSPORT	GO_ANION_TRANSMEMBRANE_TRANSPORT		178	0.27624258	0.88911617	0.673428	0.79880905	1.0	1666	tags=19%, list=13%, signal=22%
GO_STEROL_TRANSPORT	GO_STEROL_TRANSPORT		42	0.3337882	0.8889446	0.6497065	0.79840857	1.0	641	tags=14%, list=5%, signal=15%
GO_ARGININE_METABOLIC_PROCESS	GO_ARGININE_METABOLIC_PROCESS		16	0.44347626	0.8886876	0.62474644	0.798126	1.0	1702	tags=31%, list=14%, signal=36%
GO_NUCLEOSIDE_PHOSPHATE_BIOSYNTHETIC_PROCESS	GO_NUCLEOSIDE_PHOSPHATE_BIOSYNTHETIC_PROCESS		143	0.2468292	0.8877733	0.68495935	0.7991986	1.0	2066	tags=22%, list=16%, signal=26%
GO_ANTIGEN_PROCESSING_AND_PRESENTATION	GO_ANTIGEN_PROCESSING_AND_PRESENTATION		180	0.2954397	0.88758373	0.59381443	0.79883325	1.0	304	tags=6%, list=2%, signal=6%
GO_RESPONSE_TO_LEPTIN	GO_RESPONSE_TO_LEPTIN		17	0.3061793	0.8867029	0.67196816	0.799869	1.0	11	tags=6%, list=0%, signal=6%
GO_SYNAPTIC_VESICLE_CYCLE	GO_SYNAPTIC_VESICLE_CYCLE		58	0.25236404	0.8866834	0.6680162	0.7991286	1.0	1556	tags=14%, list=12%, signal=16%
GO_POSITIVE_REGULATION_OF_GLUCOSE_TRANSPORT	GO_POSITIVE_REGULATION_OF_GLUCOSE_TRANSPORT		36	0.2977417	0.88549757	0.64030135	0.800693	1.0	1950	tags=25%, list=16%, signal=30%
GO_TETRAHYDROFOLATE_METABOLIC_PROCESS	GO_TETRAHYDROFOLATE_METABOLIC_PROCESS		16	0.39472166	0.88485163	0.60240966	0.8012367	1.0	1936	tags=31%, list=15%, signal=37%
GO_REGULATION_OF_VESICLE_FUSION	GO_REGULATION_OF_VESICLE_FUSION		42	0.28524935	0.884367	0.65148515	0.8014799	1.0	1732	tags=21%, list=14%, signal=25%
GO_PHOSPHATIDYLINOSITOL_PHOSPHATE_PHOSPHATASE_ACTIVITY	GO_PHOSPHATIDYLINOSITOL_PHOSPHATE_PHOSPHATASE_ACTIVITY		24	0.281546	0.88335073	0.5786164	0.8027614	1.0	3276	tags=29%, list=26%, signal=39%
GO_NEGATIVE_REGULATION_OF_STRESS_ACTIVATED_PROTEIN_KINASE_SIGNALING_CASCADE	GO_NEGATIVE_REGULATION_OF_STRESS_ACTIVATED_PROTEIN_KINASE_SIGNALING_CASCADE		36	0.30234295	0.88330775	0.6456693	0.8020619	1.0	614	tags=11%, list=5%, signal=12%
GO_REGULATION_OF_PROTEIN_LOCALIZATION_TO_CELL_SURFACE	GO_REGULATION_OF_PROTEIN_LOCALIZATION_TO_CELL_SURFACE		23	0.29881176	0.8828887	0.6259542	0.8021188	1.0	936	tags=13%, list=7%, signal=14%
GO_MAGNESIUM_ION_BINDING	GO_MAGNESIUM_ION_BINDING		156	0.22219533	0.88263655	0.7535642	0.8018672	1.0	2408	tags=26%, list=19%, signal=32%
GO_FLAVIN_ADENINE_DINUCLEOTIDE_BINDING	GO_FLAVIN_ADENINE_DINUCLEOTIDE_BINDING		62	0.35321823	0.8820008	0.5803213	0.8023918	1.0	2342	tags=32%, list=19%, signal=39%
GO_CEREBRAL_CORTEX_DEVELOPMENT	GO_CEREBRAL_CORTEX_DEVELOPMENT		92	0.2568375	0.8819498	0.6659836	0.8017216	1.0	1384	tags=16%, list=11%, signal=18%
GO_NF_KAPPAB_BINDING	GO_NF_KAPPAB_BINDING		26	0.27294016	0.88135934	0.6092184	0.8021276	1.0	2082	tags=27%, list=17%, signal=32%
GO_PHOSPHATIDYLINOSITOL_PHOSPHATE_BINDING	GO_PHOSPHATIDYLINOSITOL_PHOSPHATE_BINDING		85	0.2344319	0.8809815	0.7006369	0.80214655	1.0	363	tags=5%, list=3%, signal=5%
GO_PROTEIN_POLYUBIQUITINATION	GO_PROTEIN_POLYUBIQUITINATION		186	0.23534821	0.8801685	0.58565736	0.8029978	1.0	2504	tags=19%, list=20%, signal=24%
GO_METHIONINE_METABOLIC_PROCESS	GO_METHIONINE_METABOLIC_PROCESS		17	0.39045095	0.88012004	0.638	0.8023324	1.0	1013	tags=18%, list=8%, signal=19%
GO_PROTEIN_LIPID_COMPLEX_SUBUNIT_ORGANIZATION	GO_PROTEIN_LIPID_COMPLEX_SUBUNIT_ORGANIZATION		32	0.3840643	0.879091	0.6117647	0.80364555	1.0	1983	tags=31%, list=16%, signal=37%
GO_ORGANIC_HYDROXY_COMPOUND_TRANSPORT	GO_ORGANIC_HYDROXY_COMPOUND_TRANSPORT		122	0.3045406	0.87879354	0.6496063	0.80350155	1.0	641	tags=14%, list=5%, signal=15%
GO_PTERIDINE_CONTAINING_COMPOUND_METABOLIC_PROCESS	GO_PTERIDINE_CONTAINING_COMPOUND_METABOLIC_PROCESS		28	0.33988866	0.8786283	0.6015936	0.8030856	1.0	1936	tags=29%, list=15%, signal=34%
GO_FATTY_ACID_TRANSPORT	GO_FATTY_ACID_TRANSPORT		45	0.32860926	0.8777882	0.62674654	0.80402666	1.0	1666	tags=29%, list=13%, signal=33%
GO_NUCLEAR_EUCHROMATIN	GO_NUCLEAR_EUCHROMATIN		20	0.32149777	0.87677586	0.63564354	0.805241	1.0	3613	tags=60%, list=29%, signal=84%
GO_QUINONE_METABOLIC_PROCESS	GO_QUINONE_METABOLIC_PROCESS		25	0.39068407	0.8753411	0.61333334	0.8074418	1.0	3191	tags=56%, list=25%, signal=75%
GO_HISTONE_DEACETYLASE_COMPLEX	GO_HISTONE_DEACETYLASE_COMPLEX		50	0.24293874	0.87413716	0.61491936	0.8090898	1.0	3488	tags=34%, list=28%, signal=47%
GO_OXIDOREDUCTASE_ACTIVITY_ACTING_ON_THE_CH_NH_GROUP_OF_DONORS	GO_OXIDOREDUCTASE_ACTIVITY_ACTING_ON_THE_CH_NH_GROUP_OF_DONORS		19	0.41826242	0.8740606	0.63394684	0.8084733	1.0	2461	tags=37%, list=20%, signal=46%
GO_PHOTOTRANSDUCTION_VISIBLE_LIGHT	GO_PHOTOTRANSDUCTION_VISIBLE_LIGHT		18	0.31832236	0.8735201	0.6008065	0.80878866	1.0	125	tags=6%, list=1%, signal=6%
GO_CYTOCHROME_COMPLEX	GO_CYTOCHROME_COMPLEX		16	0.33311978	0.8722599	0.5791583	0.810473	1.0	2452	tags=25%, list=20%, signal=31%
GO_ORGANIC_ACID_TRANSMEMBRANE_TRANSPORTER_ACTIVITY	GO_ORGANIC_ACID_TRANSMEMBRANE_TRANSPORTER_ACTIVITY		98	0.3280077	0.87162626	0.632	0.8109854	1.0	2374	tags=32%, list=19%, signal=39%
GO_SPLEEN_DEVELOPMENT	GO_SPLEEN_DEVELOPMENT		30	0.27274102	0.8711979	0.70348835	0.8110951	1.0	1757	tags=17%, list=14%, signal=19%
GO_NEUROTRANSMITTER_UPTAKE	GO_NEUROTRANSMITTER_UPTAKE		15	0.3830047	0.8708797	0.6484848	0.8109818	1.0	633	tags=20%, list=5%, signal=21%
GO_POLYUBIQUITIN_BINDING	GO_POLYUBIQUITIN_BINDING		30	0.2606909	0.8699241	0.6044177	0.8121171	1.0	3098	tags=30%, list=25%, signal=40%
GO_VESICLE_TARGETING	GO_VESICLE_TARGETING		67	0.23254617	0.86921793	0.6499033	0.81281644	1.0	3616	tags=37%, list=29%, signal=52%
GO_ADIPOSE_TISSUE_DEVELOPMENT	GO_ADIPOSE_TISSUE_DEVELOPMENT		25	0.2978809	0.86880744	0.7	0.81288046	1.0	2129	tags=28%, list=17%, signal=34%
GO_CLATHRIN_MEDIATED_ENDOCYTOSIS	GO_CLATHRIN_MEDIATED_ENDOCYTOSIS		30	0.26508826	0.86586	0.68473893	0.81793195	1.0	2607	tags=23%, list=21%, signal=29%
GO_REGULATION_OF_DEFENSE_RESPONSE_TO_VIRUS_BY_HOST	GO_REGULATION_OF_DEFENSE_RESPONSE_TO_VIRUS_BY_HOST		102	0.22362167	0.8654288	0.76152307	0.8180471	1.0	2468	tags=23%, list=20%, signal=28%
GO_PML_BODY	GO_PML_BODY		83	0.24151018	0.8653851	0.6473988	0.81736046	1.0	3157	tags=30%, list=25%, signal=40%
GO_T_CELL_APOPTOTIC_PROCESS	GO_T_CELL_APOPTOTIC_PROCESS		15	0.31078523	0.8653549	0.62851405	0.8166568	1.0	1605	tags=20%, list=13%, signal=23%
GO_SMALL_MOLECULE_CATABOLIC_PROCESS	GO_SMALL_MOLECULE_CATABOLIC_PROCESS		266	0.3263294	0.8650267	0.61077845	0.8165582	1.0	1807	tags=23%, list=14%, signal=26%
GO_ORGANIC_ANION_TRANSMEMBRANE_TRANSPORTER_ACTIVITY	GO_ORGANIC_ANION_TRANSMEMBRANE_TRANSPORTER_ACTIVITY		120	0.3090268	0.86406505	0.6935484	0.81768525	1.0	2399	tags=31%, list=19%, signal=38%
GO_CEREBELLAR_CORTEX_MORPHOGENESIS	GO_CEREBELLAR_CORTEX_MORPHOGENESIS		25	0.28293887	0.86371845	0.65416664	0.81760937	1.0	1359	tags=12%, list=11%, signal=13%
GO_PROTEIN_LOCALIZATION_TO_CILIUM	GO_PROTEIN_LOCALIZATION_TO_CILIUM		20	0.27684072	0.86362785	0.6180258	0.81701726	1.0	9065	tags=100%, list=72%, signal=361%
GO_STEROID_DEHYDROGENASE_ACTIVITY	GO_STEROID_DEHYDROGENASE_ACTIVITY		24	0.39468083	0.862188	0.6666667	0.8192039	1.0	1765	tags=42%, list=14%, signal=48%
GO_ZINC_II_ION_TRANSPORT	GO_ZINC_II_ION_TRANSPORT		16	0.34276548	0.8621056	0.6390532	0.8186039	1.0	3777	tags=31%, list=30%, signal=45%
GO_TRANSMITTER_GATED_CHANNEL_ACTIVITY	GO_TRANSMITTER_GATED_CHANNEL_ACTIVITY		21	0.3104564	0.8609908	0.6389452	0.8200855	1.0	673	tags=10%, list=5%, signal=10%
GO_HINDBRAIN_MORPHOGENESIS	GO_HINDBRAIN_MORPHOGENESIS		33	0.26316404	0.86046517	0.6864754	0.8203266	1.0	1359	tags=12%, list=11%, signal=14%
GO_POSITIVE_REGULATION_OF_VIRAL_GENOME_REPLICATION	GO_POSITIVE_REGULATION_OF_VIRAL_GENOME_REPLICATION		29	0.29040924	0.85946035	0.62109375	0.821674	1.0	2852	tags=28%, list=23%, signal=36%
GO_OXIDOREDUCTASE_ACTIVITY_ACTING_ON_A_HEME_GROUP_OF_DONORS	GO_OXIDOREDUCTASE_ACTIVITY_ACTING_ON_A_HEME_GROUP_OF_DONORS		20	0.2898781	0.85943884	0.5809129	0.82094896	1.0	4354	tags=55%, list=35%, signal=84%
GO_GLUCOCORTICOID_METABOLIC_PROCESS	GO_GLUCOCORTICOID_METABOLIC_PROCESS		15	0.40288422	0.8592913	0.6626984	0.8204681	1.0	15	tags=7%, list=0%, signal=7%
GO_PROTEIN_TYROSINE_SERINE_THREONINE_PHOSPHATASE_ACTIVITY	GO_PROTEIN_TYROSINE_SERINE_THREONINE_PHOSPHATASE_ACTIVITY		30	0.31898397	0.8588259	0.6694737	0.8206588	1.0	569	tags=13%, list=5%, signal=14%
GO_CEREBRAL_CORTEX_RADIALLY_ORIENTED_CELL_MIGRATION	GO_CEREBRAL_CORTEX_RADIALLY_ORIENTED_CELL_MIGRATION		23	0.28410867	0.8579975	0.64837396	0.82153875	1.0	909	tags=13%, list=7%, signal=14%
GO_LIPID_BIOSYNTHETIC_PROCESS	GO_LIPID_BIOSYNTHETIC_PROCESS		422	0.23769215	0.8578336	0.7548638	0.8211008	1.0	1993	tags=23%, list=16%, signal=26%
GO_HYDRO_LYASE_ACTIVITY	GO_HYDRO_LYASE_ACTIVITY		43	0.30316058	0.85732025	0.67729086	0.8213616	1.0	3670	tags=49%, list=29%, signal=69%
GO_CLUSTER_OF_ACTIN_BASED_CELL_PROJECTIONS	GO_CLUSTER_OF_ACTIN_BASED_CELL_PROJECTIONS		112	0.25250703	0.8570052	0.75308645	0.82121587	1.0	2130	tags=22%, list=17%, signal=27%
GO_DICARBOXYLIC_ACID_METABOLIC_PROCESS	GO_DICARBOXYLIC_ACID_METABOLIC_PROCESS		77	0.34185353	0.85687083	0.63983905	0.82073694	1.0	956	tags=16%, list=8%, signal=17%
GO_COFACTOR_METABOLIC_PROCESS	GO_COFACTOR_METABOLIC_PROCESS		270	0.28170994	0.8557392	0.6481481	0.8221561	1.0	3231	tags=38%, list=26%, signal=50%
GO_BENZENE_CONTAINING_COMPOUND_METABOLIC_PROCESS	GO_BENZENE_CONTAINING_COMPOUND_METABOLIC_PROCESS		20	0.43965593	0.85429144	0.6547619	0.8242839	1.0	885	tags=20%, list=7%, signal=21%
GO_ALPHA_AMINO_ACID_CATABOLIC_PROCESS	GO_ALPHA_AMINO_ACID_CATABOLIC_PROCESS		72	0.39280096	0.8541602	0.62741315	0.82377833	1.0	1289	tags=24%, list=10%, signal=26%
GO_ADRENAL_GLAND_DEVELOPMENT	GO_ADRENAL_GLAND_DEVELOPMENT		23	0.34147605	0.8540816	0.7777778	0.8231803	1.0	124	tags=9%, list=1%, signal=9%
GO_GUANOSINE_CONTAINING_COMPOUND_METABOLIC_PROCESS	GO_GUANOSINE_CONTAINING_COMPOUND_METABOLIC_PROCESS		35	0.25458384	0.85356563	0.66994107	0.82346463	1.0	3213	tags=31%, list=26%, signal=42%
GO_VENTRICULAR_CARDIAC_MUSCLE_CELL_ACTION_POTENTIAL	GO_VENTRICULAR_CARDIAC_MUSCLE_CELL_ACTION_POTENTIAL		15	0.32441702	0.8527351	0.6595331	0.8243327	1.0	837	tags=13%, list=7%, signal=14%
GO_MACROAUTOPHAGY	GO_MACROAUTOPHAGY		213	0.18805587	0.85253495	0.81466395	0.8239586	1.0	2468	tags=21%, list=20%, signal=25%
GO_PURINE_CONTAINING_COMPOUND_METABOLIC_PROCESS	GO_PURINE_CONTAINING_COMPOUND_METABOLIC_PROCESS		325	0.22689012	0.8522966	0.7298969	0.8236555	1.0	2018	tags=18%, list=16%, signal=21%
GO_PROTEIN_PHOSPHATASE_BINDING	GO_PROTEIN_PHOSPHATASE_BINDING		107	0.20756485	0.85144484	0.77227724	0.8245492	1.0	1818	tags=16%, list=15%, signal=18%
GO_CYTOSOLIC_TRANSPORT	GO_CYTOSOLIC_TRANSPORT		146	0.19672142	0.8497705	0.73214287	0.8271029	1.0	2350	tags=19%, list=19%, signal=23%
GO_COENZYME_METABOLIC_PROCESS	GO_COENZYME_METABOLIC_PROCESS		212	0.28375724	0.8497673	0.65082645	0.82634807	1.0	2373	tags=28%, list=19%, signal=34%
GO_FEMALE_GENITALIA_DEVELOPMENT	GO_FEMALE_GENITALIA_DEVELOPMENT		15	0.37530395	0.84762126	0.6686747	0.82979196	1.0	1605	tags=27%, list=13%, signal=31%
GO_NEGATIVE_REGULATION_OF_TOR_SIGNALING	GO_NEGATIVE_REGULATION_OF_TOR_SIGNALING		24	0.27806655	0.8470264	0.6731141	0.83018804	1.0	2040	tags=25%, list=16%, signal=30%
GO_ISOMERASE_ACTIVITY	GO_ISOMERASE_ACTIVITY		113	0.22864182	0.8461686	0.7504726	0.8310868	1.0	2941	tags=30%, list=23%, signal=39%
GO_OXIDOREDUCTASE_ACTIVITY_ACTING_ON_NAD_P_H_QUINONE_OR_SIMILAR_COMPOUND_AS_ACCEPTOR	GO_OXIDOREDUCTASE_ACTIVITY_ACTING_ON_NAD_P_H_QUINONE_OR_SIMILAR_COMPOUND_AS_ACCEPTOR		40	0.3009639	0.8460347	0.6292585	0.8305856	1.0	3042	tags=28%, list=24%, signal=36%
GO_TRANSFERASE_ACTIVITY_TRANSFERRING_ALKYL_OR_ARYL_OTHER_THAN_METHYL_GROUPS	GO_TRANSFERASE_ACTIVITY_TRANSFERRING_ALKYL_OR_ARYL_OTHER_THAN_METHYL_GROUPS		51	0.3001305	0.8458994	0.71457905	0.83009005	1.0	3130	tags=39%, list=25%, signal=52%
GO_HISTONE_H3_DEACETYLATION	GO_HISTONE_H3_DEACETYLATION		18	0.28214943	0.8428801	0.6434263	0.83520484	1.0	4580	tags=56%, list=37%, signal=87%
GO_ENTEROENDOCRINE_CELL_DIFFERENTIATION	GO_ENTEROENDOCRINE_CELL_DIFFERENTIATION		17	0.33650538	0.84223866	0.69135803	0.83572894	1.0	1359	tags=24%, list=11%, signal=26%
GO_POSITIVE_REGULATION_OF_MITOCHONDRION_ORGANIZATION	GO_POSITIVE_REGULATION_OF_MITOCHONDRION_ORGANIZATION		123	0.21759026	0.8415559	0.82071716	0.83627456	1.0	3161	tags=37%, list=25%, signal=50%
GO_HSP90_PROTEIN_BINDING	GO_HSP90_PROTEIN_BINDING		25	0.27399072	0.8406297	0.7078189	0.8372627	1.0	3250	tags=36%, list=26%, signal=49%
GO_SYMPORTER_ACTIVITY	GO_SYMPORTER_ACTIVITY		100	0.28848988	0.8396299	0.73293173	0.83842987	1.0	627	tags=12%, list=5%, signal=13%
GO_STRUCTURAL_CONSTITUENT_OF_CYTOSKELETON	GO_STRUCTURAL_CONSTITUENT_OF_CYTOSKELETON		92	0.22163996	0.8372931	0.741453	0.8422606	1.0	1490	tags=12%, list=12%, signal=13%
GO_AXIS_SPECIFICATION	GO_AXIS_SPECIFICATION		71	0.24686375	0.8358626	0.7645951	0.8442412	1.0	1428	tags=17%, list=11%, signal=19%
GO_REGULATION_OF_RNA_STABILITY	GO_REGULATION_OF_RNA_STABILITY		117	0.21285187	0.834536	0.6295546	0.84603643	1.0	4716	tags=50%, list=38%, signal=79%
GO_NEGATIVE_REGULATION_OF_DNA_BIOSYNTHETIC_PROCESS	GO_NEGATIVE_REGULATION_OF_DNA_BIOSYNTHETIC_PROCESS		28	0.26081666	0.8339022	0.6869919	0.84640115	1.0	2868	tags=39%, list=23%, signal=51%
GO_REGULATION_OF_HORMONE_BIOSYNTHETIC_PROCESS	GO_REGULATION_OF_HORMONE_BIOSYNTHETIC_PROCESS		15	0.36268654	0.8334678	0.72087914	0.84645706	1.0	1481	tags=33%, list=12%, signal=38%
GO_REGULATION_OF_GLUCOSE_METABOLIC_PROCESS	GO_REGULATION_OF_GLUCOSE_METABOLIC_PROCESS		84	0.26676968	0.83337307	0.7446808	0.8458823	1.0	3149	tags=36%, list=25%, signal=47%
GO_TRANSMISSION_OF_NERVE_IMPULSE	GO_TRANSMISSION_OF_NERVE_IMPULSE		45	0.27466613	0.8332675	0.722	0.8453209	1.0	483	tags=11%, list=4%, signal=12%
GO_CELLULAR_RESPONSE_TO_GLUCAGON_STIMULUS	GO_CELLULAR_RESPONSE_TO_GLUCAGON_STIMULUS		33	0.30123928	0.8322391	0.7234469	0.8465606	1.0	1303	tags=12%, list=10%, signal=13%
GO_POSITIVE_REGULATION_OF_ORGANELLE_ASSEMBLY	GO_POSITIVE_REGULATION_OF_ORGANELLE_ASSEMBLY		41	0.22902368	0.83150446	0.743487	0.8471922	1.0	992	tags=10%, list=8%, signal=11%
GO_FATTY_ACID_BETA_OXIDATION	GO_FATTY_ACID_BETA_OXIDATION		45	0.3586808	0.8313209	0.64796907	0.8467816	1.0	3570	tags=42%, list=28%, signal=59%
GO_EXCITATORY_EXTRACELLULAR_LIGAND_GATED_ION_CHANNEL_ACTIVITY	GO_EXCITATORY_EXTRACELLULAR_LIGAND_GATED_ION_CHANNEL_ACTIVITY		45	0.25905368	0.831227	0.65368855	0.8461845	1.0	557	tags=7%, list=4%, signal=7%
GO_SOLUTE_CATION_SYMPORTER_ACTIVITY	GO_SOLUTE_CATION_SYMPORTER_ACTIVITY		78	0.28518116	0.830071	0.76352704	0.8475889	1.0	627	tags=12%, list=5%, signal=12%
GO_LIPOPROTEIN_METABOLIC_PROCESS	GO_LIPOPROTEIN_METABOLIC_PROCESS		96	0.23130848	0.8284983	0.76653695	0.8498086	1.0	2043	tags=20%, list=16%, signal=23%
GO_PROTEIN_LOCALIZATION_TO_MITOCHONDRION	GO_PROTEIN_LOCALIZATION_TO_MITOCHONDRION		48	0.25826985	0.8280359	0.69896907	0.84994143	1.0	2873	tags=33%, list=23%, signal=43%
GO_POSITIVE_REGULATION_OF_TRIGLYCERIDE_METABOLIC_PROCESS	GO_POSITIVE_REGULATION_OF_TRIGLYCERIDE_METABOLIC_PROCESS		15	0.38381296	0.8276702	0.6833977	0.84987265	1.0	1540	tags=27%, list=12%, signal=30%
GO_POSITIVE_REGULATION_OF_DNA_RECOMBINATION	GO_POSITIVE_REGULATION_OF_DNA_RECOMBINATION		17	0.3200607	0.82518655	0.67346936	0.85390735	1.0	2007	tags=24%, list=16%, signal=28%
GO_MODULATION_OF_GROWTH_OF_SYMBIONT_INVOLVED_IN_INTERACTION_WITH_HOST	GO_MODULATION_OF_GROWTH_OF_SYMBIONT_INVOLVED_IN_INTERACTION_WITH_HOST		15	0.3670352	0.82490957	0.6828753	0.8536438	1.0	74	tags=7%, list=1%, signal=7%
GO_REGULATION_OF_RESPONSE_TO_FOOD	GO_REGULATION_OF_RESPONSE_TO_FOOD		16	0.2841505	0.82321686	0.6367113	0.85612124	1.0	3535	tags=25%, list=28%, signal=35%
GO_CELLULAR_AMINO_ACID_CATABOLIC_PROCESS	GO_CELLULAR_AMINO_ACID_CATABOLIC_PROCESS		88	0.36694992	0.82283646	0.6718147	0.856074	1.0	3320	tags=41%, list=26%, signal=55%
GO_UBIQUITIN_LIKE_PROTEIN_CONJUGATING_ENZYME_BINDING	GO_UBIQUITIN_LIKE_PROTEIN_CONJUGATING_ENZYME_BINDING		23	0.2621524	0.82163954	0.6793893	0.85753113	1.0	4601	tags=57%, list=37%, signal=89%
GO_MIDDLE_EAR_MORPHOGENESIS	GO_MIDDLE_EAR_MORPHOGENESIS		16	0.3103803	0.82044727	0.74596775	0.8589378	1.0	37	tags=6%, list=0%, signal=6%
GO_GOLGI_ORGANIZATION	GO_GOLGI_ORGANIZATION		66	0.22869875	0.82033217	0.6814672	0.8584025	1.0	2167	tags=17%, list=17%, signal=20%
GO_LIPOPROTEIN_PARTICLE_RECEPTOR_BINDING	GO_LIPOPROTEIN_PARTICLE_RECEPTOR_BINDING		19	0.33417636	0.8197779	0.7357724	0.8587141	1.0	2863	tags=37%, list=23%, signal=48%
GO_NEUROPEPTIDE_BINDING	GO_NEUROPEPTIDE_BINDING		16	0.30953047	0.8197296	0.6894531	0.85803634	1.0	3359	tags=31%, list=27%, signal=43%
GO_HYALURONAN_METABOLIC_PROCESS	GO_HYALURONAN_METABOLIC_PROCESS		27	0.30518556	0.8197049	0.80833334	0.8573177	1.0	468	tags=11%, list=4%, signal=12%
GO_ALCOHOL_METABOLIC_PROCESS	GO_ALCOHOL_METABOLIC_PROCESS		278	0.25442463	0.8190484	0.8300781	0.8577801	1.0	2297	tags=26%, list=18%, signal=31%
GO_HEXOSE_METABOLIC_PROCESS	GO_HEXOSE_METABOLIC_PROCESS		134	0.25157717	0.8168905	0.79012346	0.8610372	1.0	1756	tags=19%, list=14%, signal=22%
GO_RECEPTOR_SIGNALING_PROTEIN_SERINE_THREONINE_KINASE_ACTIVITY	GO_RECEPTOR_SIGNALING_PROTEIN_SERINE_THREONINE_KINASE_ACTIVITY		80	0.22311059	0.8167105	0.7160752	0.8606183	1.0	3774	tags=35%, list=30%, signal=50%
GO_ORGANIC_HYDROXY_COMPOUND_METABOLIC_PROCESS	GO_ORGANIC_HYDROXY_COMPOUND_METABOLIC_PROCESS		395	0.2603541	0.81655437	0.77603143	0.8601358	1.0	1997	tags=22%, list=16%, signal=25%
GO_OXIDOREDUCTASE_ACTIVITY_ACTING_ON_PAIRED_DONORS_WITH_INCORPORATION_OR_REDUCTION_OF_MOLECULAR_OXYGEN_NAD_P_H_AS_ONE_DONOR_AND_INCORPORATION_OF_ONE_ATOM_OF_OXYGEN	GO_OXIDOREDUCTASE_ACTIVITY_ACTING_ON_PAIRED_DONORS_WITH_INCORPORATION_OR_REDUCTION_OF_MOLECULAR_OXYGEN_NAD_P_H_AS_ONE_DONOR_AND_INCORPORATION_OF_ONE_ATOM_OF_OXYGEN		34	0.4136673	0.816237	0.7281746	0.8599851	1.0	1355	tags=26%, list=11%, signal=30%
GO_LEUKOCYTE_APOPTOTIC_PROCESS	GO_LEUKOCYTE_APOPTOTIC_PROCESS		21	0.27321813	0.8157736	0.7372709	0.8600889	1.0	1605	tags=19%, list=13%, signal=22%
GO_REGULATION_OF_TRANSLATIONAL_ELONGATION	GO_REGULATION_OF_TRANSLATIONAL_ELONGATION		17	0.30417153	0.81506544	0.6791667	0.860621	1.0	3171	tags=41%, list=25%, signal=55%
GO_DNA_DEALKYLATION	GO_DNA_DEALKYLATION		15	0.26731235	0.81100464	0.70422536	0.8673757	1.0	3622	tags=33%, list=29%, signal=47%
GO_COENZYME_BINDING	GO_COENZYME_BINDING		155	0.27637988	0.8101545	0.6964286	0.8681726	1.0	2847	tags=34%, list=23%, signal=43%
GO_STEROID_METABOLIC_PROCESS	GO_STEROID_METABOLIC_PROCESS		206	0.2991929	0.8096396	0.75977653	0.86837924	1.0	1604	tags=25%, list=13%, signal=28%
GO_SODIUM_ION_TRANSPORT	GO_SODIUM_ION_TRANSPORT		101	0.24716339	0.8091022	0.81670064	0.8686334	1.0	627	tags=9%, list=5%, signal=9%
GO_LYASE_ACTIVITY	GO_LYASE_ACTIVITY		146	0.26071158	0.8085782	0.80487806	0.86884195	1.0	1954	tags=21%, list=16%, signal=24%
GO_EMBRYONIC_AXIS_SPECIFICATION	GO_EMBRYONIC_AXIS_SPECIFICATION		26	0.25514236	0.8058114	0.7664093	0.8731182	1.0	1426	tags=15%, list=11%, signal=17%
GO_ORGANIC_HYDROXY_COMPOUND_CATABOLIC_PROCESS	GO_ORGANIC_HYDROXY_COMPOUND_CATABOLIC_PROCESS		61	0.31514305	0.80533755	0.73306775	0.87320936	1.0	1725	tags=23%, list=14%, signal=26%
GO_VESICLE_DOCKING_INVOLVED_IN_EXOCYTOSIS	GO_VESICLE_DOCKING_INVOLVED_IN_EXOCYTOSIS		28	0.26500693	0.805257	0.79288703	0.87258065	1.0	2803	tags=29%, list=22%, signal=37%
GO_HEAT_SHOCK_PROTEIN_BINDING	GO_HEAT_SHOCK_PROTEIN_BINDING		79	0.23399243	0.8044098	0.75456387	0.87334585	1.0	2278	tags=22%, list=18%, signal=26%
GO_PRESYNAPTIC_PROCESS_INVOLVED_IN_SYNAPTIC_TRANSMISSION	GO_PRESYNAPTIC_PROCESS_INVOLVED_IN_SYNAPTIC_TRANSMISSION		83	0.21660286	0.80392694	0.8340249	0.8734583	1.0	2549	tags=19%, list=20%, signal=24%
GO_RESPONSE_TO_AUDITORY_STIMULUS	GO_RESPONSE_TO_AUDITORY_STIMULUS		18	0.3097828	0.80362207	0.70746887	0.8732645	1.0	925	tags=17%, list=7%, signal=18%
GO_CORTICAL_CYTOSKELETON_ORGANIZATION	GO_CORTICAL_CYTOSKELETON_ORGANIZATION		33	0.31146812	0.8004303	0.73251027	0.8782343	1.0	1810	tags=21%, list=14%, signal=25%
GO_OXIDOREDUCTASE_ACTIVITY_ACTING_ON_THE_CH_CH_GROUP_OF_DONORS	GO_OXIDOREDUCTASE_ACTIVITY_ACTING_ON_THE_CH_CH_GROUP_OF_DONORS		48	0.33064067	0.799772	0.6849315	0.8786701	1.0	2327	tags=35%, list=19%, signal=43%
GO_REGULATION_OF_ATPASE_ACTIVITY	GO_REGULATION_OF_ATPASE_ACTIVITY		52	0.20846075	0.79890496	0.85265225	0.87943065	1.0	2733	tags=25%, list=22%, signal=32%
GO_STEROL_METABOLIC_PROCESS	GO_STEROL_METABOLIC_PROCESS		108	0.2872552	0.79887694	0.7837838	0.8787129	1.0	2255	tags=31%, list=18%, signal=38%
GO_ORGANELLE_DISASSEMBLY	GO_ORGANELLE_DISASSEMBLY		146	0.18758595	0.79849076	0.90909094	0.8786431	1.0	2072	tags=17%, list=17%, signal=20%
GO_ANION_TRANSPORT	GO_ANION_TRANSPORT		384	0.23012063	0.7954131	0.9188641	0.88329893	1.0	1759	tags=17%, list=14%, signal=19%
GO_OUTER_MEMBRANE	GO_OUTER_MEMBRANE		142	0.21254158	0.79477364	0.8956159	0.88369834	1.0	1724	tags=18%, list=14%, signal=20%
GO_ORGANIC_ANION_TRANSPORT	GO_ORGANIC_ANION_TRANSPORT		289	0.24454959	0.79400754	0.8762475	0.8843112	1.0	1568	tags=17%, list=13%, signal=19%
GO_GLUCOSE_METABOLIC_PROCESS	GO_GLUCOSE_METABOLIC_PROCESS		102	0.25888678	0.7937456	0.80497926	0.8839845	1.0	1756	tags=21%, list=14%, signal=24%
GO_ANKYRIN_BINDING	GO_ANKYRIN_BINDING		17	0.31791538	0.7937214	0.74319065	0.88325846	1.0	101	tags=6%, list=1%, signal=6%
GO_ORGANIC_ACID_CATABOLIC_PROCESS	GO_ORGANIC_ACID_CATABOLIC_PROCESS		165	0.34188524	0.79209155	0.6785714	0.88533384	1.0	3061	tags=36%, list=24%, signal=47%
GO_ALCOHOL_CATABOLIC_PROCESS	GO_ALCOHOL_CATABOLIC_PROCESS		49	0.28743088	0.79201996	0.78968257	0.88467973	1.0	1725	tags=22%, list=14%, signal=26%
GO_EXTRACELLULAR_LIGAND_GATED_ION_CHANNEL_ACTIVITY	GO_EXTRACELLULAR_LIGAND_GATED_ION_CHANNEL_ACTIVITY		61	0.23135644	0.7903501	0.72871286	0.8867944	1.0	673	tags=7%, list=5%, signal=7%
GO_MONOCARBOXYLIC_ACID_CATABOLIC_PROCESS	GO_MONOCARBOXYLIC_ACID_CATABOLIC_PROCESS		80	0.34832472	0.79013175	0.6723485	0.8864061	1.0	2980	tags=35%, list=24%, signal=46%
GO_NEUTRAL_LIPID_METABOLIC_PROCESS	GO_NEUTRAL_LIPID_METABOLIC_PROCESS		66	0.30372518	0.79006207	0.78957915	0.8857658	1.0	2036	tags=24%, list=16%, signal=29%
GO_NEGATIVE_REGULATION_OF_STRIATED_MUSCLE_CELL_DIFFERENTIATION	GO_NEGATIVE_REGULATION_OF_STRIATED_MUSCLE_CELL_DIFFERENTIATION		21	0.31305093	0.78952205	0.75527424	0.8859599	1.0	278	tags=10%, list=2%, signal=10%
GO_ANION_TRANSMEMBRANE_TRANSPORTER_ACTIVITY	GO_ANION_TRANSMEMBRANE_TRANSPORTER_ACTIVITY		210	0.24410838	0.7887585	0.9087137	0.88653475	1.0	2436	tags=24%, list=19%, signal=30%
GO_PROTEIN_HOMOTETRAMERIZATION	GO_PROTEIN_HOMOTETRAMERIZATION		52	0.29350123	0.7887096	0.76152307	0.8858561	1.0	2525	tags=27%, list=20%, signal=34%
GO_CELLULAR_KETONE_METABOLIC_PROCESS	GO_CELLULAR_KETONE_METABOLIC_PROCESS		57	0.31586832	0.788609	0.7809331	0.88527286	1.0	2975	tags=40%, list=24%, signal=53%
GO_CIS_TRANS_ISOMERASE_ACTIVITY	GO_CIS_TRANS_ISOMERASE_ACTIVITY		31	0.25462803	0.78727096	0.7817048	0.88681006	1.0	3701	tags=42%, list=30%, signal=59%
GO_COFACTOR_BINDING	GO_COFACTOR_BINDING		220	0.2700532	0.78659296	0.7207031	0.8872925	1.0	2476	tags=28%, list=20%, signal=34%
GO_INTRINSIC_COMPONENT_OF_MITOCHONDRIAL_OUTER_MEMBRANE	GO_INTRINSIC_COMPONENT_OF_MITOCHONDRIAL_OUTER_MEMBRANE		16	0.3013754	0.78207403	0.76679844	0.89430565	1.0	2666	tags=38%, list=21%, signal=48%
GO_SECONDARY_ACTIVE_TRANSMEMBRANE_TRANSPORTER_ACTIVITY	GO_SECONDARY_ACTIVE_TRANSMEMBRANE_TRANSPORTER_ACTIVITY		162	0.25337443	0.78166586	0.8909091	0.89425886	1.0	627	tags=10%, list=5%, signal=11%
GO_APICAL_JUNCTION_ASSEMBLY	GO_APICAL_JUNCTION_ASSEMBLY		31	0.27160594	0.7814609	0.748062	0.8938347	1.0	1872	tags=19%, list=15%, signal=23%
GO_RNA_POLYMERASE_II_REPRESSING_TRANSCRIPTION_FACTOR_BINDING	GO_RNA_POLYMERASE_II_REPRESSING_TRANSCRIPTION_FACTOR_BINDING		20	0.2696299	0.7811623	0.7682243	0.89356023	1.0	3488	tags=40%, list=28%, signal=55%
GO_OXIDOREDUCTASE_ACTIVITY_ACTING_ON_THE_CH_CH_GROUP_OF_DONORS_NAD_OR_NADP_AS_ACCEPTOR	GO_OXIDOREDUCTASE_ACTIVITY_ACTING_ON_THE_CH_CH_GROUP_OF_DONORS_NAD_OR_NADP_AS_ACCEPTOR		20	0.35366687	0.78051424	0.77911645	0.89391947	1.0	1299	tags=30%, list=10%, signal=33%
GO_SYNAPTIC_SIGNALING	GO_SYNAPTIC_SIGNALING		349	0.1847299	0.7801397	0.8422131	0.8938261	1.0	673	tags=7%, list=5%, signal=7%
GO_AMMONIUM_ION_METABOLIC_PROCESS	GO_AMMONIUM_ION_METABOLIC_PROCESS		132	0.24754399	0.7799143	0.90515465	0.8934822	1.0	1400	tags=17%, list=11%, signal=19%
GO_ISOPRENOID_BIOSYNTHETIC_PROCESS	GO_ISOPRENOID_BIOSYNTHETIC_PROCESS		21	0.34106997	0.77977353	0.772	0.8929484	1.0	2503	tags=43%, list=20%, signal=53%
GO_CELLULAR_RESPONSE_TO_DSRNA	GO_CELLULAR_RESPONSE_TO_DSRNA		30	0.26195544	0.77825373	0.80124223	0.8947355	1.0	4077	tags=53%, list=33%, signal=79%
GO_TBP_CLASS_PROTEIN_BINDING	GO_TBP_CLASS_PROTEIN_BINDING		19	0.24626108	0.7781576	0.7104247	0.8941281	1.0	2657	tags=21%, list=21%, signal=27%
GO_MITOCHONDRIAL_MEMBRANE_ORGANIZATION	GO_MITOCHONDRIAL_MEMBRANE_ORGANIZATION		72	0.20734948	0.7760418	0.81150794	0.89699453	1.0	3662	tags=39%, list=29%, signal=55%
GO_INNER_MITOCHONDRIAL_MEMBRANE_PROTEIN_COMPLEX	GO_INNER_MITOCHONDRIAL_MEMBRANE_PROTEIN_COMPLEX		80	0.22599632	0.77454877	0.6150713	0.89871824	1.0	4730	tags=46%, list=38%, signal=74%
GO_NEGATIVE_REGULATION_OF_MEIOTIC_CELL_CYCLE	GO_NEGATIVE_REGULATION_OF_MEIOTIC_CELL_CYCLE		15	0.2915182	0.7743619	0.7917485	0.8982717	1.0	741	tags=13%, list=6%, signal=14%
GO_COATED_MEMBRANE	GO_COATED_MEMBRANE		62	0.18872887	0.7725843	0.76352704	0.9004989	1.0	4293	tags=39%, list=34%, signal=59%
GO_POSITIVE_REGULATION_OF_DNA_BIOSYNTHETIC_PROCESS	GO_POSITIVE_REGULATION_OF_DNA_BIOSYNTHETIC_PROCESS		50	0.26439276	0.77235156	0.7653061	0.9001261	1.0	1005	tags=14%, list=8%, signal=15%
GO_NADP_METABOLIC_PROCESS	GO_NADP_METABOLIC_PROCESS		23	0.31423846	0.77232933	0.7905544	0.8994024	1.0	2373	tags=43%, list=19%, signal=54%
GO_PHOTOPERIODISM	GO_PHOTOPERIODISM		20	0.25269645	0.7721646	0.7710843	0.89890164	1.0	2702	tags=30%, list=22%, signal=38%
GO_HYDROLASE_ACTIVITY_ACTING_ON_CARBON_NITROGEN_BUT_NOT_PEPTIDE_BONDS_IN_LINEAR_AMIDES	GO_HYDROLASE_ACTIVITY_ACTING_ON_CARBON_NITROGEN_BUT_NOT_PEPTIDE_BONDS_IN_LINEAR_AMIDES		65	0.21020707	0.77136093	0.8485437	0.8994843	1.0	3488	tags=32%, list=28%, signal=45%
GO_TRANSFERASE_ACTIVITY_TRANSFERRING_PENTOSYL_GROUPS	GO_TRANSFERASE_ACTIVITY_TRANSFERRING_PENTOSYL_GROUPS		41	0.22217819	0.7703307	0.80452675	0.9004519	1.0	1838	tags=22%, list=15%, signal=26%
GO_REGULATION_OF_PROTEIN_PHOSPHATASE_TYPE_2A_ACTIVITY	GO_REGULATION_OF_PROTEIN_PHOSPHATASE_TYPE_2A_ACTIVITY		21	0.2385545	0.7685384	0.78775513	0.9025997	1.0	3973	tags=38%, list=32%, signal=56%
GO_POSITIVE_REGULATION_OF_CELL_CYCLE_G2_M_PHASE_TRANSITION	GO_POSITIVE_REGULATION_OF_CELL_CYCLE_G2_M_PHASE_TRANSITION		15	0.3048867	0.76732874	0.7631579	0.90377617	1.0	1522	tags=27%, list=12%, signal=30%
GO_HYDROLASE_ACTIVITY_ACTING_ON_CARBON_NITROGEN_BUT_NOT_PEPTIDE_BONDS	GO_HYDROLASE_ACTIVITY_ACTING_ON_CARBON_NITROGEN_BUT_NOT_PEPTIDE_BONDS		110	0.21372487	0.76728225	0.8787879	0.9030812	1.0	2252	tags=19%, list=18%, signal=23%
GO_ORGANOPHOSPHATE_CATABOLIC_PROCESS	GO_ORGANOPHOSPHATE_CATABOLIC_PROCESS		85	0.21862379	0.76693594	0.904	0.9029151	1.0	3697	tags=40%, list=30%, signal=56%
GO_NITRIC_OXIDE_METABOLIC_PROCESS	GO_NITRIC_OXIDE_METABOLIC_PROCESS		15	0.34589455	0.7648321	0.8235294	0.90554357	1.0	939	tags=27%, list=7%, signal=29%
GO_MONOSACCHARIDE_BIOSYNTHETIC_PROCESS	GO_MONOSACCHARIDE_BIOSYNTHETIC_PROCESS		52	0.29500324	0.762598	0.7987805	0.90840364	1.0	1680	tags=23%, list=13%, signal=27%
GO_ESTABLISHMENT_OF_PROTEIN_LOCALIZATION_TO_ENDOPLASMIC_RETICULUM	GO_ESTABLISHMENT_OF_PROTEIN_LOCALIZATION_TO_ENDOPLASMIC_RETICULUM		80	0.22725755	0.7610867	0.6230159	0.9100069	1.0	4748	tags=45%, list=38%, signal=72%
GO_CELLULAR_RESPONSE_TO_AMINO_ACID_STARVATION	GO_CELLULAR_RESPONSE_TO_AMINO_ACID_STARVATION		21	0.25181305	0.7587887	0.7927063	0.9128832	1.0	3274	tags=43%, list=26%, signal=58%
GO_RAC_GTPASE_BINDING	GO_RAC_GTPASE_BINDING		31	0.2601191	0.75612074	0.7840671	0.9162744	1.0	930	tags=13%, list=7%, signal=14%
GO_CARBOXY_LYASE_ACTIVITY	GO_CARBOXY_LYASE_ACTIVITY		26	0.3016318	0.75594383	0.8342967	0.9157863	1.0	1183	tags=15%, list=9%, signal=17%
GO_SODIUM_ION_TRANSMEMBRANE_TRANSPORTER_ACTIVITY	GO_SODIUM_ION_TRANSMEMBRANE_TRANSPORTER_ACTIVITY		103	0.24143882	0.75560504	0.91434264	0.9155368	1.0	627	tags=10%, list=5%, signal=10%
GO_POSITIVE_REGULATION_OF_LIPID_CATABOLIC_PROCESS	GO_POSITIVE_REGULATION_OF_LIPID_CATABOLIC_PROCESS		22	0.31610385	0.7555079	0.776	0.9149076	1.0	1732	tags=27%, list=14%, signal=32%
GO_REGULATION_OF_MEGAKARYOCYTE_DIFFERENTIATION	GO_REGULATION_OF_MEGAKARYOCYTE_DIFFERENTIATION		20	0.25313592	0.75280225	0.82822084	0.9183997	1.0	1221	tags=20%, list=10%, signal=22%
GO_SNARE_COMPLEX	GO_SNARE_COMPLEX		43	0.22005634	0.75191593	0.80914515	0.9189589	1.0	4579	tags=42%, list=37%, signal=66%
GO_PROTEIN_TARGETING	GO_PROTEIN_TARGETING		321	0.15643151	0.75099915	0.8666667	0.919579	1.0	3917	tags=34%, list=31%, signal=48%
GO_OXIDOREDUCTASE_ACTIVITY_ACTING_ON_THE_ALDEHYDE_OR_OXO_GROUP_OF_DONORS_NAD_OR_NADP_AS_ACCEPTOR	GO_OXIDOREDUCTASE_ACTIVITY_ACTING_ON_THE_ALDEHYDE_OR_OXO_GROUP_OF_DONORS_NAD_OR_NADP_AS_ACCEPTOR		31	0.33304206	0.74959093	0.7684631	0.92092705	1.0	3160	tags=42%, list=25%, signal=56%
GO_L_AMINO_ACID_TRANSMEMBRANE_TRANSPORTER_ACTIVITY	GO_L_AMINO_ACID_TRANSMEMBRANE_TRANSPORTER_ACTIVITY		42	0.2597551	0.7488887	0.88531184	0.92124236	1.0	2287	tags=29%, list=18%, signal=35%
GO_PEPTIDYL_ASPARAGINE_MODIFICATION	GO_PEPTIDYL_ASPARAGINE_MODIFICATION		28	0.2444076	0.74689656	0.84150946	0.9234944	1.0	1037	tags=11%, list=8%, signal=12%
GO_SINGLE_ORGANISM_MEMBRANE_BUDDING	GO_SINGLE_ORGANISM_MEMBRANE_BUDDING		61	0.19075572	0.74667406	0.81142855	0.9230518	1.0	3619	tags=38%, list=29%, signal=53%
GO_CELL_SURFACE_RECEPTOR_SIGNALING_PATHWAY_INVOLVED_IN_CELL_CELL_SIGNALING	GO_CELL_SURFACE_RECEPTOR_SIGNALING_PATHWAY_INVOLVED_IN_CELL_CELL_SIGNALING		62	0.2042347	0.74642783	0.8647541	0.92266077	1.0	1359	tags=11%, list=11%, signal=13%
GO_PHENOL_CONTAINING_COMPOUND_METABOLIC_PROCESS	GO_PHENOL_CONTAINING_COMPOUND_METABOLIC_PROCESS		70	0.24682537	0.7460307	0.920078	0.9224746	1.0	132	tags=4%, list=1%, signal=4%
GO_SOLUTE_SODIUM_SYMPORTER_ACTIVITY	GO_SOLUTE_SODIUM_SYMPORTER_ACTIVITY		41	0.2822775	0.7452567	0.8665339	0.92286885	1.0	627	tags=15%, list=5%, signal=15%
GO_CYTOPLASMIC_STRESS_GRANULE	GO_CYTOPLASMIC_STRESS_GRANULE		27	0.22819245	0.74450845	0.71511626	0.92321193	1.0	4592	tags=52%, list=37%, signal=82%
GO_REGULATION_OF_GLYCOGEN_METABOLIC_PROCESS	GO_REGULATION_OF_GLYCOGEN_METABOLIC_PROCESS		28	0.24381715	0.7430169	0.84210527	0.9246518	1.0	1063	tags=14%, list=8%, signal=16%
GO_MONOCARBOXYLIC_ACID_TRANSMEMBRANE_TRANSPORTER_ACTIVITY	GO_MONOCARBOXYLIC_ACID_TRANSMEMBRANE_TRANSPORTER_ACTIVITY		29	0.3568275	0.742293	0.84431136	0.9249423	1.0	1070	tags=24%, list=9%, signal=26%
GO_INTESTINAL_ABSORPTION	GO_INTESTINAL_ABSORPTION		23	0.32163537	0.74202806	0.9137255	0.9245509	1.0	1609	tags=26%, list=13%, signal=30%
GO_PROTEASOME_ACCESSORY_COMPLEX	GO_PROTEASOME_ACCESSORY_COMPLEX		23	0.29311183	0.7400972	0.7026477	0.9265647	1.0	4548	tags=48%, list=36%, signal=75%
GO_CYCLIN_DEPENDENT_PROTEIN_KINASE_HOLOENZYME_COMPLEX	GO_CYCLIN_DEPENDENT_PROTEIN_KINASE_HOLOENZYME_COMPLEX		28	0.23020275	0.7397779	0.8556701	0.9262679	1.0	4489	tags=61%, list=36%, signal=94%
GO_PURINE_CONTAINING_COMPOUND_CATABOLIC_PROCESS	GO_PURINE_CONTAINING_COMPOUND_CATABOLIC_PROCESS		41	0.2496426	0.739439	0.91093117	0.9259943	1.0	3345	tags=37%, list=27%, signal=50%
GO_HORMONE_METABOLIC_PROCESS	GO_HORMONE_METABOLIC_PROCESS		132	0.26187944	0.7393108	0.93514645	0.92541695	1.0	1842	tags=20%, list=15%, signal=23%
GO_REACTIVE_NITROGEN_SPECIES_METABOLIC_PROCESS	GO_REACTIVE_NITROGEN_SPECIES_METABOLIC_PROCESS		16	0.33085763	0.73762715	0.8627451	0.92708415	1.0	939	tags=25%, list=7%, signal=27%
GO_PYRIDOXAL_PHOSPHATE_BINDING	GO_PYRIDOXAL_PHOSPHATE_BINDING		38	0.32030192	0.73721254	0.80430526	0.9269249	1.0	913	tags=13%, list=7%, signal=14%
GO_GLUTATHIONE_METABOLIC_PROCESS	GO_GLUTATHIONE_METABOLIC_PROCESS		45	0.2876768	0.7367441	0.88819873	0.926816	1.0	2709	tags=31%, list=22%, signal=40%
GO_MOTILE_CILIUM	GO_MOTILE_CILIUM		63	0.23473221	0.7357886	0.91004187	0.9273951	1.0	3093	tags=27%, list=25%, signal=36%
GO_ORGANELLE_FUSION	GO_ORGANELLE_FUSION		84	0.19569126	0.73448974	0.88958335	0.9284509	1.0	2737	tags=21%, list=22%, signal=27%
GO_PALMITOYLTRANSFERASE_ACTIVITY	GO_PALMITOYLTRANSFERASE_ACTIVITY		17	0.24627307	0.73441184	0.8427419	0.9277913	1.0	1666	tags=18%, list=13%, signal=20%
GO_POSITIVE_REGULATION_OF_NUCLEOTIDE_CATABOLIC_PROCESS	GO_POSITIVE_REGULATION_OF_NUCLEOTIDE_CATABOLIC_PROCESS		16	0.30210137	0.73285073	0.8391039	0.9292255	1.0	1495	tags=25%, list=12%, signal=28%
GO_REPRESSING_TRANSCRIPTION_FACTOR_BINDING	GO_REPRESSING_TRANSCRIPTION_FACTOR_BINDING		46	0.21097742	0.7325615	0.9009524	0.9289037	1.0	2393	tags=22%, list=19%, signal=27%
GO_ACETYLCHOLINE_BINDING	GO_ACETYLCHOLINE_BINDING		19	0.26130676	0.73208886	0.73505974	0.9288024	1.0	2599	tags=21%, list=21%, signal=27%
GO_CALCIUM_ION_REGULATED_EXOCYTOSIS	GO_CALCIUM_ION_REGULATED_EXOCYTOSIS		49	0.21764691	0.7314866	0.920082	0.9288623	1.0	1556	tags=14%, list=12%, signal=16%
GO_PIGMENT_GRANULE	GO_PIGMENT_GRANULE		97	0.19273213	0.7293195	0.86	0.93109196	1.0	864	tags=7%, list=7%, signal=8%
GO_INTRINSIC_COMPONENT_OF_MITOCHONDRIAL_MEMBRANE	GO_INTRINSIC_COMPONENT_OF_MITOCHONDRIAL_MEMBRANE		32	0.24293303	0.72787964	0.8562992	0.93225044	1.0	2666	tags=34%, list=21%, signal=44%
GO_CELLULAR_MODIFIED_AMINO_ACID_BIOSYNTHETIC_PROCESS	GO_CELLULAR_MODIFIED_AMINO_ACID_BIOSYNTHETIC_PROCESS		40	0.26818517	0.7275933	0.8215768	0.93188566	1.0	1205	tags=15%, list=10%, signal=17%
GO_L_AMINO_ACID_TRANSPORT	GO_L_AMINO_ACID_TRANSPORT		45	0.24639957	0.7271953	0.92783505	0.93166006	1.0	2287	tags=27%, list=18%, signal=33%
GO_REGULATION_OF_CELLULAR_KETONE_METABOLIC_PROCESS	GO_REGULATION_OF_CELLULAR_KETONE_METABOLIC_PROCESS		141	0.21163775	0.72641283	0.94386697	0.9319877	1.0	1815	tags=18%, list=14%, signal=21%
GO_PROTEIN_PHOSPHATASE_2A_BINDING	GO_PROTEIN_PHOSPHATASE_2A_BINDING		24	0.24449484	0.72618675	0.81692916	0.93152493	1.0	4048	tags=42%, list=32%, signal=61%
GO_LAMIN_BINDING	GO_LAMIN_BINDING		16	0.27991626	0.7248594	0.82711196	0.9325755	1.0	1299	tags=19%, list=10%, signal=21%
GO_PYRIMIDINE_NUCLEOBASE_METABOLIC_PROCESS	GO_PYRIMIDINE_NUCLEOBASE_METABOLIC_PROCESS		15	0.34255525	0.7245593	0.83	0.9322208	1.0	2425	tags=40%, list=19%, signal=50%
GO_RIBONUCLEOSIDE_CATABOLIC_PROCESS	GO_RIBONUCLEOSIDE_CATABOLIC_PROCESS		21	0.30318466	0.72349286	0.8565401	0.9328522	1.0	1174	tags=14%, list=9%, signal=16%
GO_REGULATION_OF_STEM_CELL_POPULATION_MAINTENANCE	GO_REGULATION_OF_STEM_CELL_POPULATION_MAINTENANCE		15	0.26607937	0.7233248	0.7891683	0.9323182	1.0	3001	tags=33%, list=24%, signal=44%
GO_ACTIVE_TRANSMEMBRANE_TRANSPORTER_ACTIVITY	GO_ACTIVE_TRANSMEMBRANE_TRANSPORTER_ACTIVITY		260	0.2151983	0.72206426	0.96192384	0.9332608	1.0	627	tags=8%, list=5%, signal=9%
GO_OXIDOREDUCTASE_COMPLEX	GO_OXIDOREDUCTASE_COMPLEX		78	0.21323909	0.7201212	0.8140496	0.9350646	1.0	3160	tags=26%, list=25%, signal=34%
GO_ACETYLCHOLINE_RECEPTOR_ACTIVITY	GO_ACETYLCHOLINE_RECEPTOR_ACTIVITY		24	0.24175277	0.71990246	0.76953906	0.9345976	1.0	2599	tags=17%, list=21%, signal=21%
GO_ENTRAINMENT_OF_CIRCADIAN_CLOCK_BY_PHOTOPERIOD	GO_ENTRAINMENT_OF_CIRCADIAN_CLOCK_BY_PHOTOPERIOD		15	0.26536423	0.7198663	0.845679	0.93388784	1.0	2702	tags=33%, list=22%, signal=42%
GO_ACIDIC_AMINO_ACID_TRANSPORT	GO_ACIDIC_AMINO_ACID_TRANSPORT		20	0.30864316	0.719303	0.884058	0.9338554	1.0	1149	tags=20%, list=9%, signal=22%
GO_EMBRYONIC_DIGIT_MORPHOGENESIS	GO_EMBRYONIC_DIGIT_MORPHOGENESIS		51	0.22615829	0.71924025	0.8877339	0.93318415	1.0	931	tags=10%, list=7%, signal=11%
GO_O_ACYLTRANSFERASE_ACTIVITY	GO_O_ACYLTRANSFERASE_ACTIVITY		29	0.25987458	0.71901166	0.9018405	0.93276316	1.0	2806	tags=38%, list=22%, signal=49%
GO_REGULATION_OF_RESPONSE_TO_INTERFERON_GAMMA	GO_REGULATION_OF_RESPONSE_TO_INTERFERON_GAMMA		20	0.27885184	0.7172534	0.80785125	0.93428594	1.0	1464	tags=20%, list=12%, signal=23%
GO_POSITIVE_REGULATION_OF_RELEASE_OF_CYTOCHROME_C_FROM_MITOCHONDRIA	GO_POSITIVE_REGULATION_OF_RELEASE_OF_CYTOCHROME_C_FROM_MITOCHONDRIA		24	0.27876765	0.7162239	0.9254658	0.93492997	1.0	2062	tags=33%, list=16%, signal=40%
GO_REGULATION_OF_RESPONSE_TO_REACTIVE_OXYGEN_SPECIES	GO_REGULATION_OF_RESPONSE_TO_REACTIVE_OXYGEN_SPECIES		30	0.27497175	0.7156233	0.87246966	0.93493634	1.0	2494	tags=30%, list=20%, signal=37%
GO_OXIDOREDUCTION_COENZYME_METABOLIC_PROCESS	GO_OXIDOREDUCTION_COENZYME_METABOLIC_PROCESS		89	0.23972811	0.7129696	0.9173729	0.9375446	1.0	3191	tags=38%, list=25%, signal=51%
GO_CHAPERONE_MEDIATED_PROTEIN_FOLDING	GO_CHAPERONE_MEDIATED_PROTEIN_FOLDING		39	0.23585683	0.7128793	0.8582996	0.936907	1.0	3701	tags=38%, list=30%, signal=54%
GO_NATURAL_KILLER_CELL_MEDIATED_IMMUNITY	GO_NATURAL_KILLER_CELL_MEDIATED_IMMUNITY		18	0.31476292	0.71084636	0.8049281	0.93868446	1.0	2489	tags=28%, list=20%, signal=35%
GO_CELLULAR_MODIFIED_AMINO_ACID_METABOLIC_PROCESS	GO_CELLULAR_MODIFIED_AMINO_ACID_METABOLIC_PROCESS		174	0.23857276	0.7104172	0.9604743	0.9384719	1.0	898	tags=13%, list=7%, signal=14%
GO_RECEPTOR_CLUSTERING	GO_RECEPTOR_CLUSTERING		38	0.23789279	0.7074107	0.9188034	0.9413617	1.0	1626	tags=18%, list=13%, signal=21%
GO_MITOCHONDRIAL_MEMBRANE_PART	GO_MITOCHONDRIAL_MEMBRANE_PART		122	0.18518935	0.705646	0.73939395	0.94272476	1.0	4122	tags=40%, list=33%, signal=59%
GO_REGULATION_OF_TRIGLYCERIDE_METABOLIC_PROCESS	GO_REGULATION_OF_TRIGLYCERIDE_METABOLIC_PROCESS		25	0.2678366	0.7039232	0.8513514	0.94399226	1.0	1772	tags=20%, list=14%, signal=23%
GO_PHOSPHATIDYLINOSITOL_DEPHOSPHORYLATION	GO_PHOSPHATIDYLINOSITOL_DEPHOSPHORYLATION		19	0.24018635	0.70323676	0.8148893	0.9440658	1.0	3276	tags=26%, list=26%, signal=36%
GO_PHOSPHOLIPID_DEPHOSPHORYLATION	GO_PHOSPHOLIPID_DEPHOSPHORYLATION		27	0.23849303	0.7027087	0.8977505	0.9439565	1.0	769	tags=7%, list=6%, signal=8%
GO_POSITIVE_REGULATION_OF_GLUCOSE_METABOLIC_PROCESS	GO_POSITIVE_REGULATION_OF_GLUCOSE_METABOLIC_PROCESS		29	0.2626477	0.7021065	0.86564296	0.94392455	1.0	1815	tags=28%, list=14%, signal=32%
GO_SULFUR_COMPOUND_TRANSMEMBRANE_TRANSPORTER_ACTIVITY	GO_SULFUR_COMPOUND_TRANSMEMBRANE_TRANSPORTER_ACTIVITY		18	0.32070854	0.7018113	0.88381743	0.9435122	1.0	1956	tags=39%, list=16%, signal=46%
GO_MANGANESE_ION_BINDING	GO_MANGANESE_ION_BINDING		41	0.2124528	0.69878715	0.9291045	0.94627285	1.0	2929	tags=27%, list=23%, signal=35%
GO_RNA_STABILIZATION	GO_RNA_STABILIZATION		26	0.21338749	0.69822544	0.84090906	0.9461405	1.0	3562	tags=35%, list=28%, signal=48%
GO_TRIGLYCERIDE_CATABOLIC_PROCESS	GO_TRIGLYCERIDE_CATABOLIC_PROCESS		18	0.35833955	0.69753116	0.84407485	0.9461184	1.0	969	tags=17%, list=8%, signal=18%
GO_NUCLEOTIDE_BINDING_DOMAIN_LEUCINE_RICH_REPEAT_CONTAINING_RECEPTOR_SIGNALING_PATHWAY	GO_NUCLEOTIDE_BINDING_DOMAIN_LEUCINE_RICH_REPEAT_CONTAINING_RECEPTOR_SIGNALING_PATHWAY		24	0.23848635	0.6905743	0.8580376	0.9531935	1.0	3788	tags=38%, list=30%, signal=54%
GO_DEMETHYLATION	GO_DEMETHYLATION		43	0.23282385	0.6889392	0.85542166	0.95415527	1.0	2364	tags=21%, list=19%, signal=26%
GO_ALKALI_METAL_ION_BINDING	GO_ALKALI_METAL_ION_BINDING		17	0.26147538	0.6882518	0.9303279	0.9541334	1.0	2821	tags=35%, list=23%, signal=45%
GO_INTRA_GOLGI_VESICLE_MEDIATED_TRANSPORT	GO_INTRA_GOLGI_VESICLE_MEDIATED_TRANSPORT		29	0.20279786	0.68685114	0.8423154	0.9548764	1.0	3822	tags=38%, list=31%, signal=54%
GO_SECONDARY_METABOLIC_PROCESS	GO_SECONDARY_METABOLIC_PROCESS		43	0.29655656	0.6866226	0.9321357	0.9543582	1.0	894	tags=14%, list=7%, signal=15%
GO_SINGLE_STRANDED_RNA_BINDING	GO_SINGLE_STRANDED_RNA_BINDING		54	0.18612875	0.6849035	0.86734694	0.95544076	1.0	3221	tags=33%, list=26%, signal=45%
GO_NADH_METABOLIC_PROCESS	GO_NADH_METABOLIC_PROCESS		34	0.25009385	0.683412	0.95652175	0.95624506	1.0	3731	tags=41%, list=30%, signal=58%
GO_ATP_GENERATION_FROM_ADP	GO_ATP_GENERATION_FROM_ADP		35	0.2522604	0.6822647	0.9856263	0.95668495	1.0	1503	tags=20%, list=12%, signal=23%
GO_CYTOPLASMIC_PATTERN_RECOGNITION_RECEPTOR_SIGNALING_PATHWAY	GO_CYTOPLASMIC_PATTERN_RECOGNITION_RECEPTOR_SIGNALING_PATHWAY		29	0.24241848	0.6820479	0.8780488	0.9561542	1.0	2099	tags=17%, list=17%, signal=21%
GO_PHOTORECEPTOR_OUTER_SEGMENT	GO_PHOTORECEPTOR_OUTER_SEGMENT		58	0.19508252	0.68166316	0.97125256	0.95579207	1.0	1014	tags=9%, list=8%, signal=9%
GO_PROTEIN_SERINE_THREONINE_KINASE_INHIBITOR_ACTIVITY	GO_PROTEIN_SERINE_THREONINE_KINASE_INHIBITOR_ACTIVITY		24	0.25568563	0.67990106	0.9432049	0.95688117	1.0	1303	tags=17%, list=10%, signal=19%
GO_CELLULAR_PROTEIN_COMPLEX_LOCALIZATION	GO_CELLULAR_PROTEIN_COMPLEX_LOCALIZATION		15	0.27255353	0.6790763	0.8939709	0.95699024	1.0	3032	tags=40%, list=24%, signal=53%
GO_ACTIVATION_OF_PROTEIN_KINASE_A_ACTIVITY	GO_ACTIVATION_OF_PROTEIN_KINASE_A_ACTIVITY		15	0.26830664	0.67787963	0.9221311	0.9574699	1.0	1303	tags=20%, list=10%, signal=22%
GO_CARBOHYDRATE_KINASE_ACTIVITY	GO_CARBOHYDRATE_KINASE_ACTIVITY		19	0.26967752	0.67639065	0.96025103	0.95817894	1.0	3104	tags=47%, list=25%, signal=63%
GO_NUCLEOTIDE_PHOSPHORYLATION	GO_NUCLEOTIDE_PHOSPHORYLATION		49	0.2242712	0.6763559	0.9725159	0.9574586	1.0	1508	tags=18%, list=12%, signal=21%
GO_PYRIMIDINE_CONTAINING_COMPOUND_CATABOLIC_PROCESS	GO_PYRIMIDINE_CONTAINING_COMPOUND_CATABOLIC_PROCESS		24	0.2452647	0.67510676	0.92105263	0.95793307	1.0	2483	tags=29%, list=20%, signal=36%
GO_ALDEHYDE_DEHYDROGENASE_NAD_ACTIVITY	GO_ALDEHYDE_DEHYDROGENASE_NAD_ACTIVITY		17	0.34671444	0.6722951	0.82086617	0.95997196	1.0	2503	tags=35%, list=20%, signal=44%
GO_ALDO_KETO_REDUCTASE_NADP_ACTIVITY	GO_ALDO_KETO_REDUCTASE_NADP_ACTIVITY		17	0.33542845	0.6709787	0.8957055	0.9604899	1.0	585	tags=18%, list=5%, signal=18%
GO_ETHANOLAMINE_CONTAINING_COMPOUND_METABOLIC_PROCESS	GO_ETHANOLAMINE_CONTAINING_COMPOUND_METABOLIC_PROCESS		61	0.2345864	0.67038655	0.98804784	0.9602957	1.0	651	tags=11%, list=5%, signal=12%
GO_FAT_SOLUBLE_VITAMIN_METABOLIC_PROCESS	GO_FAT_SOLUBLE_VITAMIN_METABOLIC_PROCESS		28	0.2878977	0.6701392	0.95098037	0.959786	1.0	425	tags=11%, list=3%, signal=11%
GO_GENERATION_OF_PRECURSOR_METABOLITES_AND_ENERGY	GO_GENERATION_OF_PRECURSOR_METABOLITES_AND_ENERGY		242	0.18597978	0.66985905	0.9107505	0.9593074	1.0	3761	tags=33%, list=30%, signal=46%
GO_ENDOSOME_TO_LYSOSOME_TRANSPORT	GO_ENDOSOME_TO_LYSOSOME_TRANSPORT		34	0.20479979	0.6689259	0.92433536	0.9594118	1.0	3168	tags=26%, list=25%, signal=35%
GO_RAB_GTPASE_BINDING	GO_RAB_GTPASE_BINDING		84	0.17274112	0.6683527	0.98178136	0.9591894	1.0	3270	tags=29%, list=26%, signal=38%
GO_GTP_METABOLIC_PROCESS	GO_GTP_METABOLIC_PROCESS		16	0.2668189	0.6638692	0.9116466	0.9625278	1.0	2987	tags=38%, list=24%, signal=49%
GO_COFACTOR_TRANSPORTER_ACTIVITY	GO_COFACTOR_TRANSPORTER_ACTIVITY		16	0.27784336	0.6633702	0.89122134	0.96223944	1.0	2248	tags=38%, list=18%, signal=46%
GO_DETECTION_OF_LIGHT_STIMULUS	GO_DETECTION_OF_LIGHT_STIMULUS		43	0.20007294	0.66321826	0.8843137	0.9616325	1.0	483	tags=5%, list=4%, signal=5%
GO_LIPID_CATABOLIC_PROCESS	GO_LIPID_CATABOLIC_PROCESS		183	0.23784357	0.66205114	0.9656566	0.9619596	1.0	2630	tags=27%, list=21%, signal=33%
GO_CELLULAR_COMPONENT_ASSEMBLY_INVOLVED_IN_MORPHOGENESIS	GO_CELLULAR_COMPONENT_ASSEMBLY_INVOLVED_IN_MORPHOGENESIS		168	0.16313533	0.6615391	0.99188644	0.96167505	1.0	2751	tags=22%, list=22%, signal=28%
GO_PROTON_TRANSPORTING_TWO_SECTOR_ATPASE_COMPLEX_PROTON_TRANSPORTING_DOMAIN	GO_PROTON_TRANSPORTING_TWO_SECTOR_ATPASE_COMPLEX_PROTON_TRANSPORTING_DOMAIN		18	0.22606161	0.65749824	0.8298755	0.964502	1.0	2718	tags=28%, list=22%, signal=35%
GO_DRUG_TRANSPORTER_ACTIVITY	GO_DRUG_TRANSPORTER_ACTIVITY		18	0.33549768	0.65510803	0.9257028	0.9658144	1.0	1568	tags=22%, list=13%, signal=25%
GO_REGULATION_OF_ERAD_PATHWAY	GO_REGULATION_OF_ERAD_PATHWAY		22	0.19852659	0.65321654	0.8854369	0.96668375	1.0	3196	tags=23%, list=26%, signal=30%
GO_HIGH_DENSITY_LIPOPROTEIN_PARTICLE_REMODELING	GO_HIGH_DENSITY_LIPOPROTEIN_PARTICLE_REMODELING		15	0.3260915	0.65320015	0.9423077	0.9659479	1.0	1419	tags=27%, list=11%, signal=30%
GO_OXIDOREDUCTASE_ACTIVITY_ACTING_ON_CH_OH_GROUP_OF_DONORS	GO_OXIDOREDUCTASE_ACTIVITY_ACTING_ON_CH_OH_GROUP_OF_DONORS		102	0.26512977	0.65260285	0.92621356	0.9657143	1.0	2342	tags=30%, list=19%, signal=37%
GO_ADP_METABOLIC_PROCESS	GO_ADP_METABOLIC_PROCESS		41	0.23147747	0.6516646	0.98136646	0.96575445	1.0	1503	tags=17%, list=12%, signal=19%
GO_SYNAPTIC_TRANSMISSION_DOPAMINERGIC	GO_SYNAPTIC_TRANSMISSION_DOPAMINERGIC		16	0.277582	0.64576715	0.8787276	0.96981335	1.0	909	tags=13%, list=7%, signal=13%
GO_GLUCAN_METABOLIC_PROCESS	GO_GLUCAN_METABOLIC_PROCESS		46	0.2321636	0.64557266	0.94208497	0.96919703	1.0	3264	tags=33%, list=26%, signal=44%
GO_BICELLULAR_TIGHT_JUNCTION_ASSEMBLY	GO_BICELLULAR_TIGHT_JUNCTION_ASSEMBLY		25	0.23699112	0.6451208	0.8880309	0.9688111	1.0	1872	tags=20%, list=15%, signal=23%
GO_GLUCOSE_CATABOLIC_PROCESS	GO_GLUCOSE_CATABOLIC_PROCESS		28	0.246353	0.64247626	0.98807156	0.97013795	1.0	1503	tags=18%, list=12%, signal=20%
GO_SPERM_FLAGELLUM	GO_SPERM_FLAGELLUM		33	0.2310562	0.641481	0.9609054	0.9701473	1.0	3093	tags=30%, list=25%, signal=40%
GO_OXIDATIVE_PHOSPHORYLATION	GO_OXIDATIVE_PHOSPHORYLATION		66	0.1913516	0.6413536	0.7409639	0.9694937	1.0	4382	tags=33%, list=35%, signal=51%
GO_CELLULAR_LIPID_CATABOLIC_PROCESS	GO_CELLULAR_LIPID_CATABOLIC_PROCESS		120	0.24246979	0.6409529	0.9353535	0.9690477	1.0	3331	tags=35%, list=27%, signal=47%
GO_MULTI_ORGANISM_BEHAVIOR	GO_MULTI_ORGANISM_BEHAVIOR		65	0.18311384	0.63926876	0.99002	0.96955335	1.0	2268	tags=17%, list=18%, signal=21%
GO_MODULATION_OF_EXCITATORY_POSTSYNAPTIC_POTENTIAL	GO_MODULATION_OF_EXCITATORY_POSTSYNAPTIC_POTENTIAL		24	0.22296946	0.6367187	0.94008267	0.9707131	1.0	2157	tags=21%, list=17%, signal=25%
GO_BRAIN_MORPHOGENESIS	GO_BRAIN_MORPHOGENESIS		27	0.23114683	0.63462687	0.96907216	0.9714953	1.0	1368	tags=15%, list=11%, signal=17%
GO_VESICLE_DOCKING	GO_VESICLE_DOCKING		44	0.19358847	0.6339268	0.97119343	0.9712643	1.0	2549	tags=20%, list=20%, signal=26%
GO_TRANS_GOLGI_NETWORK_MEMBRANE	GO_TRANS_GOLGI_NETWORK_MEMBRANE		55	0.21897754	0.6333548	0.93621397	0.97093767	1.0	222	tags=5%, list=2%, signal=6%
GO_TRIGLYCERIDE_LIPASE_ACTIVITY	GO_TRIGLYCERIDE_LIPASE_ACTIVITY		15	0.29419607	0.63297576	0.95039684	0.97046494	1.0	3331	tags=33%, list=27%, signal=45%
GO_CELLULAR_RESPIRATION	GO_CELLULAR_RESPIRATION		118	0.19173458	0.63273835	0.7980198	0.96991247	1.0	3406	tags=26%, list=27%, signal=36%
GO_PORPHYRIN_CONTAINING_COMPOUND_METABOLIC_PROCESS	GO_PORPHYRIN_CONTAINING_COMPOUND_METABOLIC_PROCESS		32	0.24144614	0.63183534	0.9019608	0.96980923	1.0	3351	tags=41%, list=27%, signal=55%
GO_REGULATION_OF_TRANSLATION_IN_RESPONSE_TO_STRESS	GO_REGULATION_OF_TRANSLATION_IN_RESPONSE_TO_STRESS		17	0.22847836	0.62986475	0.9326733	0.9704164	1.0	2953	tags=41%, list=24%, signal=54%
GO_NEUROTRANSMITTER_RECEPTOR_ACTIVITY	GO_NEUROTRANSMITTER_RECEPTOR_ACTIVITY		57	0.18605481	0.62641174	0.8996063	0.9720427	1.0	1086	tags=7%, list=9%, signal=8%
GO_MACROMOLECULAR_COMPLEX_REMODELING	GO_MACROMOLECULAR_COMPLEX_REMODELING		22	0.29905918	0.6259134	0.9669903	0.9716186	1.0	1419	tags=23%, list=11%, signal=26%
GO_HEME_METABOLIC_PROCESS	GO_HEME_METABOLIC_PROCESS		25	0.22277363	0.624333	0.898	0.97189933	1.0	3351	tags=40%, list=27%, signal=54%
GO_NEGATIVE_REGULATION_OF_TYPE_I_INTERFERON_PRODUCTION	GO_NEGATIVE_REGULATION_OF_TYPE_I_INTERFERON_PRODUCTION		33	0.23501553	0.62395465	0.88297874	0.9714319	1.0	2484	tags=21%, list=20%, signal=26%
GO_AROMATIC_AMINO_ACID_FAMILY_METABOLIC_PROCESS	GO_AROMATIC_AMINO_ACID_FAMILY_METABOLIC_PROCESS		20	0.3150969	0.6216645	0.9361277	0.9721958	1.0	3206	tags=40%, list=26%, signal=54%
GO_NUCLEAR_CYCLIN_DEPENDENT_PROTEIN_KINASE_HOLOENZYME_COMPLEX	GO_NUCLEAR_CYCLIN_DEPENDENT_PROTEIN_KINASE_HOLOENZYME_COMPLEX		15	0.22472471	0.61965376	0.9223301	0.97269034	1.0	4479	tags=60%, list=36%, signal=93%
GO_ENERGY_DERIVATION_BY_OXIDATION_OF_ORGANIC_COMPOUNDS	GO_ENERGY_DERIVATION_BY_OXIDATION_OF_ORGANIC_COMPOUNDS		178	0.1791382	0.6137354	0.9096386	0.97559154	1.0	3264	tags=26%, list=26%, signal=35%
GO_REGULATION_OF_SYNAPTIC_VESICLE_TRANSPORT	GO_REGULATION_OF_SYNAPTIC_VESICLE_TRANSPORT		23	0.21889447	0.60969555	0.93877554	0.9772232	1.0	1556	tags=13%, list=12%, signal=15%
GO_NEUTRAL_LIPID_CATABOLIC_PROCESS	GO_NEUTRAL_LIPID_CATABOLIC_PROCESS		22	0.29833177	0.606681	0.94017094	0.97819704	1.0	1983	tags=23%, list=16%, signal=27%
GO_BILE_ACID_METABOLIC_PROCESS	GO_BILE_ACID_METABOLIC_PROCESS		31	0.3109322	0.6065375	0.956	0.9775255	1.0	1422	tags=29%, list=11%, signal=33%
GO_DEAMINASE_ACTIVITY	GO_DEAMINASE_ACTIVITY		21	0.23954964	0.60611784	0.95426196	0.97701234	1.0	2161	tags=19%, list=17%, signal=23%
GO_ENDOPLASMIC_RETICULUM_TO_CYTOSOL_TRANSPORT	GO_ENDOPLASMIC_RETICULUM_TO_CYTOSOL_TRANSPORT		17	0.23506318	0.6053024	0.9288618	0.9767529	1.0	983	tags=12%, list=8%, signal=13%
GO_NEUROPEPTIDE_SIGNALING_PATHWAY	GO_NEUROPEPTIDE_SIGNALING_PATHWAY		67	0.17748904	0.593308	0.97410357	0.9823473	1.0	925	tags=7%, list=7%, signal=8%
GO_REGULATION_OF_TYPE_I_INTERFERON_MEDIATED_SIGNALING_PATHWAY	GO_REGULATION_OF_TYPE_I_INTERFERON_MEDIATED_SIGNALING_PATHWAY		34	0.17022541	0.59268063	0.94959676	0.98193806	1.0	274	tags=3%, list=2%, signal=3%
GO_ELECTRON_TRANSPORT_CHAIN	GO_ELECTRON_TRANSPORT_CHAIN		75	0.1836551	0.590398	0.81781375	0.9823161	1.0	4483	tags=33%, list=36%, signal=52%
GO_BLOOD_COAGULATION_INTRINSIC_PATHWAY	GO_BLOOD_COAGULATION_INTRINSIC_PATHWAY		17	0.30125135	0.5894624	0.8807157	0.9820464	1.0	2003	tags=29%, list=16%, signal=35%
GO_REGULATION_OF_CYSTEINE_TYPE_ENDOPEPTIDASE_ACTIVITY_INVOLVED_IN_APOPTOTIC_SIGNALING_PATHWAY	GO_REGULATION_OF_CYSTEINE_TYPE_ENDOPEPTIDASE_ACTIVITY_INVOLVED_IN_APOPTOTIC_SIGNALING_PATHWAY		21	0.21854804	0.57909334	0.953629	0.9859082	1.0	2583	tags=29%, list=21%, signal=36%
GO_PRE_AUTOPHAGOSOMAL_STRUCTURE	GO_PRE_AUTOPHAGOSOMAL_STRUCTURE		23	0.18440999	0.5784665	0.936	0.9854346	1.0	4533	tags=43%, list=36%, signal=68%
GO_TRANSFERASE_ACTIVITY_TRANSFERRING_NITROGENOUS_GROUPS	GO_TRANSFERASE_ACTIVITY_TRANSFERRING_NITROGENOUS_GROUPS		17	0.25805438	0.57780546	0.96367115	0.98497367	1.0	746	tags=12%, list=6%, signal=12%
GO_ESTABLISHMENT_OF_PROTEIN_LOCALIZATION_TO_VACUOLE	GO_ESTABLISHMENT_OF_PROTEIN_LOCALIZATION_TO_VACUOLE		24	0.19587617	0.5762012	0.97755104	0.9848901	1.0	677	tags=8%, list=5%, signal=9%
GO_DRUG_METABOLIC_PROCESS	GO_DRUG_METABOLIC_PROCESS		29	0.32058975	0.5721539	0.96728015	0.9857578	1.0	1039	tags=24%, list=8%, signal=26%
GO_ERAD_PATHWAY	GO_ERAD_PATHWAY		56	0.17290205	0.5685897	0.9233717	0.9864239	1.0	3196	tags=25%, list=26%, signal=33%
GO_PHOTOTRANSDUCTION	GO_PHOTOTRANSDUCTION		34	0.17885928	0.5652699	0.97	0.98697853	1.0	125	tags=3%, list=1%, signal=3%
GO_GABA_RECEPTOR_COMPLEX	GO_GABA_RECEPTOR_COMPLEX		15	0.23048553	0.5652087	0.9435798	0.98626465	1.0	4431	tags=40%, list=35%, signal=62%
GO_LEUKOCYTE_MEDIATED_CYTOTOXICITY	GO_LEUKOCYTE_MEDIATED_CYTOTOXICITY		28	0.23081188	0.56515074	0.96881497	0.98555136	1.0	2489	tags=25%, list=20%, signal=31%
GO_AEROBIC_RESPIRATION	GO_AEROBIC_RESPIRATION		46	0.19484642	0.5633358	0.8740458	0.98553044	1.0	3160	tags=30%, list=25%, signal=41%
GO_OXIDOREDUCTASE_ACTIVITY_ACTING_ON_THE_ALDEHYDE_OR_OXO_GROUP_OF_DONORS	GO_OXIDOREDUCTASE_ACTIVITY_ACTING_ON_THE_ALDEHYDE_OR_OXO_GROUP_OF_DONORS		40	0.25102803	0.5569422	0.96831685	0.9870402	1.0	2942	tags=35%, list=23%, signal=46%
GO_TRIGLYCERIDE_RICH_LIPOPROTEIN_PARTICLE	GO_TRIGLYCERIDE_RICH_LIPOPROTEIN_PARTICLE		16	0.24856593	0.5480512	0.9918699	0.98920983	1.0	1983	tags=19%, list=16%, signal=22%
GO_NEUTRAL_LIPID_BIOSYNTHETIC_PROCESS	GO_NEUTRAL_LIPID_BIOSYNTHETIC_PROCESS		19	0.23642248	0.5460839	0.99198395	0.9890809	1.0	1839	tags=21%, list=15%, signal=25%
GO_PHOSPHATIDYLINOSITOL_3_PHOSPHATE_BINDING	GO_PHOSPHATIDYLINOSITOL_3_PHOSPHATE_BINDING		19	0.17213792	0.53049314	0.9940711	0.9926938	1.0	3270	tags=32%, list=26%, signal=43%
GO_IRE1_MEDIATED_UNFOLDED_PROTEIN_RESPONSE	GO_IRE1_MEDIATED_UNFOLDED_PROTEIN_RESPONSE		51	0.1558031	0.5302905	0.9412916	0.9920026	1.0	3644	tags=25%, list=29%, signal=36%
GO_BILE_ACID_AND_BILE_SALT_TRANSPORT	GO_BILE_ACID_AND_BILE_SALT_TRANSPORT		25	0.26721954	0.52710354	0.9776876	0.9920469	1.0	1070	tags=12%, list=9%, signal=13%
GO_NADH_DEHYDROGENASE_COMPLEX	GO_NADH_DEHYDROGENASE_COMPLEX		33	0.16972828	0.524917	0.87848604	0.9918339	1.0	5610	tags=58%, list=45%, signal=104%
GO_REGULATION_OF_SYNAPTIC_VESICLE_EXOCYTOSIS	GO_REGULATION_OF_SYNAPTIC_VESICLE_EXOCYTOSIS		15	0.20955075	0.5230249	0.95131844	0.9915577	1.0	4062	tags=40%, list=32%, signal=59%
GO_GASTRULATION_WITH_MOUTH_FORMING_SECOND	GO_GASTRULATION_WITH_MOUTH_FORMING_SECOND		25	0.17695	0.52024746	0.9894958	0.99143416	1.0	3510	tags=32%, list=28%, signal=44%
GO_GLYCOSYL_COMPOUND_CATABOLIC_PROCESS	GO_GLYCOSYL_COMPOUND_CATABOLIC_PROCESS		33	0.20698448	0.51729894	1.0	0.9913745	1.0	2483	tags=21%, list=20%, signal=26%
GO_HYDROGEN_ION_TRANSMEMBRANE_TRANSPORT	GO_HYDROGEN_ION_TRANSMEMBRANE_TRANSPORT		76	0.13366972	0.5167608	0.95841587	0.99075943	1.0	4435	tags=39%, list=35%, signal=61%
GO_ATPASE_ACTIVATOR_ACTIVITY	GO_ATPASE_ACTIVATOR_ACTIVITY		16	0.18171567	0.51059484	0.97808766	0.9913057	1.0	2733	tags=19%, list=22%, signal=24%
GO_ER_ASSOCIATED_UBIQUITIN_DEPENDENT_PROTEIN_CATABOLIC_PROCESS	GO_ER_ASSOCIATED_UBIQUITIN_DEPENDENT_PROTEIN_CATABOLIC_PROCESS		47	0.16023014	0.48898754	0.9808429	0.9944646	1.0	3196	tags=23%, list=26%, signal=31%
GO_PROTEASOME_COMPLEX	GO_PROTEASOME_COMPLEX		65	0.15400831	0.4734344	0.9530612	0.99592185	1.0	4823	tags=43%, list=38%, signal=70%
GO_EATING_BEHAVIOR	GO_EATING_BEHAVIOR		27	0.15724286	0.4714659	0.99215686	0.995439	1.0	2980	tags=22%, list=24%, signal=29%
GO_PROTON_TRANSPORTING_TWO_SECTOR_ATPASE_COMPLEX	GO_PROTON_TRANSPORTING_TWO_SECTOR_ATPASE_COMPLEX		37	0.13791305	0.4639163	0.98418975	0.9955443	1.0	4435	tags=38%, list=35%, signal=58%
GO_PROTEIN_LOCALIZATION_TO_VACUOLE	GO_PROTEIN_LOCALIZATION_TO_VACUOLE		36	0.13610612	0.45338544	1.0	0.9958951	1.0	677	tags=6%, list=5%, signal=6%
GO_GABA_RECEPTOR_ACTIVITY	GO_GABA_RECEPTOR_ACTIVITY		18	0.17698103	0.4461317	0.9980392	0.9957835	1.0	3314	tags=28%, list=26%, signal=38%
