# Supplementary material for: CELSR3 mRNA expression is increased in hepatocellular carcinoma and indicates poor prognosis
Source: PeerJ journal article supplement (doi:10.7717/peerj.7816), 2019-10-07
Supplement: The_complete_GSEA_results_of_TCGA.zip [file The_complete_GSEA_results_of_TCGA.zip]

NAME	GS<br> follow link to MSigDB	GS DETAILS	SIZE	ES	NES	NOM p-val	FDR q-val	FWER p-val	RANK AT MAX	LEADING EDGE
GO_DNA_REPLICATION	GO_DNA_REPLICATION	Details ...	197	0.71800566	2.505907	0.0	0.0	0.0	2185	tags=48%, list=7%, signal=51%
GO_DNA_DEPENDENT_DNA_REPLICATION	GO_DNA_DEPENDENT_DNA_REPLICATION	Details ...	93	0.7719604	2.4694052	0.0	0.0	0.0	2110	tags=53%, list=7%, signal=57%
GO_DNA_SYNTHESIS_INVOLVED_IN_DNA_REPAIR	GO_DNA_SYNTHESIS_INVOLVED_IN_DNA_REPAIR	Details ...	70	0.71179307	2.3636134	0.0	5.003659E-4	0.002	2185	tags=47%, list=7%, signal=51%
GO_CONDENSED_CHROMOSOME	GO_CONDENSED_CHROMOSOME	Details ...	176	0.67884344	2.3523748	0.0	3.7527442E-4	0.002	1825	tags=44%, list=6%, signal=46%
GO_DNA_BIOSYNTHETIC_PROCESS	GO_DNA_BIOSYNTHETIC_PROCESS	Details ...	111	0.6374201	2.3417833	0.0	3.0021954E-4	0.002	2954	tags=42%, list=10%, signal=47%
GO_CONDENSED_NUCLEAR_CHROMOSOME	GO_CONDENSED_NUCLEAR_CHROMOSOME	Details ...	76	0.6764826	2.3331962	0.0	2.5018296E-4	0.002	2547	tags=46%, list=9%, signal=50%
GO_DNA_RECOMBINATION	GO_DNA_RECOMBINATION	Details ...	192	0.63705015	2.3299098	0.0	2.1444254E-4	0.002	4785	tags=51%, list=16%, signal=61%
GO_RECOMBINATIONAL_REPAIR	GO_RECOMBINATIONAL_REPAIR	Details ...	71	0.69767034	2.319617	0.0	2.5888908E-4	0.003	2382	tags=46%, list=8%, signal=50%
GO_REPLICATION_FORK	GO_REPLICATION_FORK	Details ...	62	0.74489987	2.2832687	0.0	6.043115E-4	0.009	2071	tags=56%, list=7%, signal=61%
GO_CONDENSED_CHROMOSOME_CENTROMERIC_REGION	GO_CONDENSED_CHROMOSOME_CENTROMERIC_REGION	Details ...	89	0.73569137	2.2554076	0.0	9.844474E-4	0.01	1825	tags=53%, list=6%, signal=56%
GO_CENTROSOME_CYCLE	GO_CENTROSOME_CYCLE	Details ...	45	0.72249174	2.2445974	0.0	0.0011749235	0.013	1621	tags=40%, list=6%, signal=42%
GO_DOUBLE_STRAND_BREAK_REPAIR	GO_DOUBLE_STRAND_BREAK_REPAIR	Details ...	152	0.6061997	2.2438164	0.0	0.0010770131	0.013	4785	tags=45%, list=16%, signal=53%
GO_MITOTIC_RECOMBINATION	GO_MITOTIC_RECOMBINATION	Details ...	41	0.8159258	2.2430313	0.0	9.94166E-4	0.013	3373	tags=76%, list=11%, signal=85%
GO_DNA_DEPENDENT_DNA_REPLICATION_MAINTENANCE_OF_FIDELITY	GO_DNA_DEPENDENT_DNA_REPLICATION_MAINTENANCE_OF_FIDELITY	Details ...	21	0.8159767	2.2424092	0.0	9.231541E-4	0.013	1829	tags=62%, list=6%, signal=66%
GO_NUCLEAR_REPLICATION_FORK	GO_NUCLEAR_REPLICATION_FORK	Details ...	39	0.7271565	2.2406294	0.0	8.830033E-4	0.014	2071	tags=49%, list=7%, signal=52%
GO_TELOMERE_ORGANIZATION	GO_TELOMERE_ORGANIZATION	Details ...	97	0.60980123	2.2293	0.0	0.0010328317	0.021	3813	tags=42%, list=13%, signal=48%
GO_MEIOTIC_CELL_CYCLE_PROCESS	GO_MEIOTIC_CELL_CYCLE_PROCESS	Details ...	138	0.5826491	2.2278795	0.0	9.912467E-4	0.021	4695	tags=43%, list=16%, signal=51%
GO_CELL_CYCLE_G1_S_PHASE_TRANSITION	GO_CELL_CYCLE_G1_S_PHASE_TRANSITION	Details ...	109	0.6623997	2.2212207	0.0	0.001086768	0.022	3923	tags=51%, list=13%, signal=59%
GO_CHROMOSOMAL_REGION	GO_CHROMOSOMAL_REGION	Details ...	302	0.60501057	2.2205741	0.0	0.0010496997	0.023	2717	tags=38%, list=9%, signal=41%
GO_DNA_REPAIR	GO_DNA_REPAIR	Details ...	443	0.5380694	2.22003	0.0	9.972147E-4	0.023	4868	tags=39%, list=17%, signal=46%
GO_DNA_REPLICATION_INITIATION	GO_DNA_REPLICATION_INITIATION	Details ...	29	0.8634134	2.2137756	0.0	0.0011140951	0.024	2110	tags=69%, list=7%, signal=74%
GO_MEIOSIS_I	GO_MEIOSIS_I	Details ...	78	0.6021414	2.2073348	0.0	0.0012526409	0.029	1824	tags=36%, list=6%, signal=38%
GO_DNA_STRAND_ELONGATION	GO_DNA_STRAND_ELONGATION	Details ...	30	0.8067176	2.201839	0.0	0.001302458	0.03	2071	tags=67%, list=7%, signal=72%
GO_MEIOTIC_CELL_CYCLE	GO_MEIOTIC_CELL_CYCLE	Details ...	170	0.5639274	2.200386	0.0	0.0012481889	0.03	2808	tags=35%, list=10%, signal=39%
GO_TELOMERE_MAINTENANCE_VIA_RECOMBINATION	GO_TELOMERE_MAINTENANCE_VIA_RECOMBINATION	Details ...	32	0.822444	2.1861129	0.0	0.0016375997	0.04	2071	tags=72%, list=7%, signal=77%
GO_INTERSTRAND_CROSS_LINK_REPAIR	GO_INTERSTRAND_CROSS_LINK_REPAIR	Details ...	40	0.7000411	2.1848686	0.0	0.001614926	0.043	4570	tags=63%, list=16%, signal=74%
GO_REPLISOME	GO_REPLISOME	Details ...	29	0.75050163	2.1843777	0.0	0.0015551139	0.043	2961	tags=55%, list=10%, signal=61%
GO_CHROMOSOME_CENTROMERIC_REGION	GO_CHROMOSOME_CENTROMERIC_REGION	Details ...	159	0.6509091	2.180911	0.0	0.0015367069	0.045	2547	tags=45%, list=9%, signal=49%
GO_HISTONE_EXCHANGE	GO_HISTONE_EXCHANGE	Details ...	46	0.72476906	2.174994	0.0	0.0016962806	0.049	5132	tags=61%, list=17%, signal=74%
GO_ATP_DEPENDENT_CHROMATIN_REMODELING	GO_ATP_DEPENDENT_CHROMATIN_REMODELING	Details ...	67	0.6712942	2.1732426	0.0	0.001686946	0.051	5132	tags=54%, list=17%, signal=65%
GO_CELL_CYCLE_PHASE_TRANSITION	GO_CELL_CYCLE_PHASE_TRANSITION	Details ...	250	0.5805746	2.170593	0.0	0.0016679879	0.053	3923	tags=42%, list=13%, signal=48%
GO_DNA_CONFORMATION_CHANGE	GO_DNA_CONFORMATION_CHANGE	Details ...	243	0.5722827	2.169181	0.0	0.001643002	0.054	5132	tags=43%, list=17%, signal=51%
GO_REGULATION_OF_DNA_REPAIR	GO_REGULATION_OF_DNA_REPAIR	Details ...	70	0.59086967	2.1591032	0.0	0.0019441595	0.068	4542	tags=41%, list=15%, signal=49%
GO_KINETOCHORE	GO_KINETOCHORE	Details ...	109	0.66913044	2.1589026	0.0	0.0018869785	0.068	3907	tags=53%, list=13%, signal=61%
GO_NUCLEAR_CHROMOSOME	GO_NUCLEAR_CHROMOSOME	Details ...	483	0.5203952	2.1576147	0.0	0.0018571289	0.068	5765	tags=40%, list=20%, signal=49%
GO_CHROMOSOME_SEGREGATION	GO_CHROMOSOME_SEGREGATION	Details ...	254	0.61103237	2.1540124	0.0	0.0018972418	0.074	2496	tags=41%, list=8%, signal=44%
GO_SISTER_CHROMATID_COHESION	GO_SISTER_CHROMATID_COHESION	Details ...	105	0.699241	2.152017	0.0	0.00195646	0.076	2496	tags=51%, list=8%, signal=56%
GO_MISMATCH_REPAIR	GO_MISMATCH_REPAIR	Details ...	30	0.7130814	2.1486032	0.0	0.0020061794	0.081	4479	tags=63%, list=15%, signal=75%
GO_NEGATIVE_REGULATION_OF_CELL_DIVISION	GO_NEGATIVE_REGULATION_OF_CELL_DIVISION	Details ...	56	0.6194794	2.1473262	0.0	0.0020319188	0.085	1710	tags=38%, list=6%, signal=40%
GO_DNA_STRAND_ELONGATION_INVOLVED_IN_DNA_REPLICATION	GO_DNA_STRAND_ELONGATION_INVOLVED_IN_DNA_REPLICATION	Details ...	25	0.8392438	2.142729	0.0	0.0021179111	0.092	2071	tags=76%, list=7%, signal=82%
GO_OOCYTE_MATURATION	GO_OOCYTE_MATURATION	Details ...	17	0.746662	2.139966	0.0	0.002188892	0.095	1108	tags=41%, list=4%, signal=43%
GO_NUCLEAR_CHROMOSOME_SEGREGATION	GO_NUCLEAR_CHROMOSOME_SEGREGATION	Details ...	211	0.6220432	2.1370451	0.0	0.0021825202	0.097	2496	tags=43%, list=8%, signal=46%
GO_SISTER_CHROMATID_SEGREGATION	GO_SISTER_CHROMATID_SEGREGATION	Details ...	167	0.66433275	2.134474	0.0	0.0022655602	0.1	2806	tags=49%, list=10%, signal=53%
GO_REGULATION_OF_DOUBLE_STRAND_BREAK_REPAIR_VIA_HOMOLOGOUS_RECOMBINATION	GO_REGULATION_OF_DOUBLE_STRAND_BREAK_REPAIR_VIA_HOMOLOGOUS_RECOMBINATION	Details ...	17	0.77029127	2.132241	0.0	0.0023496647	0.106	760	tags=47%, list=3%, signal=48%
GO_DNA_SECONDARY_STRUCTURE_BINDING	GO_DNA_SECONDARY_STRUCTURE_BINDING	Details ...	24	0.7616488	2.1321733	0.0	0.0022974499	0.106	4518	tags=71%, list=15%, signal=84%
GO_STRAND_DISPLACEMENT	GO_STRAND_DISPLACEMENT	Details ...	26	0.8418526	2.1317108	0.0	0.0022728909	0.108	2185	tags=73%, list=7%, signal=79%
GO_MICROTUBULE_ORGANIZING_CENTER_PART	GO_MICROTUBULE_ORGANIZING_CENTER_PART	Details ...	137	0.54208183	2.1307788	0.0	0.0022245315	0.108	4402	tags=36%, list=15%, signal=43%
GO_DNA_DEPENDENT_ATPASE_ACTIVITY	GO_DNA_DEPENDENT_ATPASE_ACTIVITY	Details ...	78	0.6588798	2.1303697	0.0	0.002196417	0.108	4561	tags=50%, list=16%, signal=59%
GO_SPINDLE_CHECKPOINT	GO_SPINDLE_CHECKPOINT	Details ...	24	0.7432586	2.124578	0.0	0.0023481948	0.113	1458	tags=46%, list=5%, signal=48%
GO_DNA_PACKAGING	GO_DNA_PACKAGING	Details ...	165	0.5804315	2.1228209	0.0	0.0024152345	0.115	5132	tags=44%, list=17%, signal=53%
GO_MICROTUBULE_ORGANIZING_CENTER_ORGANIZATION	GO_MICROTUBULE_ORGANIZING_CENTER_ORGANIZATION	Details ...	82	0.62222546	2.1156695	0.0	0.0026974361	0.128	2864	tags=38%, list=10%, signal=42%
GO_CHROMOSOME_CONDENSATION	GO_CHROMOSOME_CONDENSATION	Details ...	27	0.76567346	2.1123984	0.0	0.002818232	0.136	3729	tags=74%, list=13%, signal=85%
GO_ORGANELLE_FISSION	GO_ORGANELLE_FISSION	Details ...	461	0.53636557	2.1106906	0.0	0.0028095099	0.137	2808	tags=34%, list=10%, signal=37%
GO_G2_DNA_DAMAGE_CHECKPOINT	GO_G2_DNA_DAMAGE_CHECKPOINT	Details ...	33	0.6445704	2.1100683	0.0	0.0028159332	0.141	3301	tags=36%, list=11%, signal=41%
GO_CHROMOSOME_TELOMERIC_REGION	GO_CHROMOSOME_TELOMERIC_REGION	Details ...	149	0.5524517	2.1083734	0.0	0.0028126906	0.143	3668	tags=33%, list=12%, signal=37%
GO_DNA_REPLICATION_INDEPENDENT_NUCLEOSOME_ORGANIZATION	GO_DNA_REPLICATION_INDEPENDENT_NUCLEOSOME_ORGANIZATION	Details ...	47	0.70783305	2.1055698	0.0	0.0029439898	0.151	5132	tags=62%, list=17%, signal=75%
GO_CENTRIOLE	GO_CENTRIOLE	Details ...	95	0.58067995	2.103273	0.0	0.0030278156	0.158	4965	tags=43%, list=17%, signal=52%
GO_CENTROMERE_COMPLEX_ASSEMBLY	GO_CENTROMERE_COMPLEX_ASSEMBLY	Details ...	42	0.7272789	2.0952191	0.0	0.003348778	0.17	5132	tags=67%, list=17%, signal=81%
GO_DNA_DIRECTED_DNA_POLYMERASE_ACTIVITY	GO_DNA_DIRECTED_DNA_POLYMERASE_ACTIVITY	Details ...	26	0.65269464	2.0913801	0.0	0.0035508808	0.181	3925	tags=46%, list=13%, signal=53%
GO_DNA_POLYMERASE_ACTIVITY	GO_DNA_POLYMERASE_ACTIVITY	Details ...	33	0.6129896	2.0906162	0.0	0.0035259654	0.182	3925	tags=39%, list=13%, signal=45%
GO_DEOXYRIBONUCLEASE_ACTIVITY	GO_DEOXYRIBONUCLEASE_ACTIVITY	Details ...	64	0.5618305	2.0879993	0.0	0.0035887584	0.187	4570	tags=42%, list=16%, signal=50%
GO_REGULATION_OF_CHROMOSOME_SEGREGATION	GO_REGULATION_OF_CHROMOSOME_SEGREGATION	Details ...	78	0.6427507	2.085367	0.0	0.0036672098	0.192	2475	tags=38%, list=8%, signal=42%
GO_NUCLEAR_CHROMOSOME_TELOMERIC_REGION	GO_NUCLEAR_CHROMOSOME_TELOMERIC_REGION	Details ...	121	0.5606113	2.0706742	0.0	0.0044716047	0.222	3589	tags=33%, list=12%, signal=37%
GO_REGULATION_OF_SISTER_CHROMATID_SEGREGATION	GO_REGULATION_OF_SISTER_CHROMATID_SEGREGATION	Details ...	62	0.6213983	2.0689433	0.0	0.004567309	0.227	2475	tags=35%, list=8%, signal=39%
GO_NEGATIVE_REGULATION_OF_NUCLEAR_DIVISION	GO_NEGATIVE_REGULATION_OF_NUCLEAR_DIVISION	Details ...	42	0.633917	2.0574498	0.0	0.0051881773	0.253	1650	tags=36%, list=6%, signal=38%
GO_HETEROCHROMATIN	GO_HETEROCHROMATIN	Details ...	65	0.5979371	2.0537755	0.0	0.005412041	0.26	5828	tags=49%, list=20%, signal=61%
GO_CELL_CYCLE_CHECKPOINT	GO_CELL_CYCLE_CHECKPOINT	Details ...	183	0.53674823	2.0526617	0.0	0.005401047	0.261	2297	tags=30%, list=8%, signal=32%
GO_REGULATION_OF_DNA_DEPENDENT_DNA_REPLICATION	GO_REGULATION_OF_DNA_DEPENDENT_DNA_REPLICATION	Details ...	40	0.6732393	2.0459132	0.00203666	0.0060183215	0.277	2052	tags=43%, list=7%, signal=46%
GO_REGULATION_OF_NUCLEAR_DIVISION	GO_REGULATION_OF_NUCLEAR_DIVISION	Details ...	152	0.5065483	2.0446153	0.0	0.005999442	0.28	3509	tags=32%, list=12%, signal=36%
GO_ERROR_PRONE_TRANSLESION_SYNTHESIS	GO_ERROR_PRONE_TRANSLESION_SYNTHESIS	Details ...	19	0.72418123	2.0384436	0.0	0.0064603104	0.289	1897	tags=47%, list=6%, signal=51%
GO_REGULATION_OF_TRANSCRIPTION_INVOLVED_IN_G1_S_TRANSITION_OF_MITOTIC_CELL_CYCLE	GO_REGULATION_OF_TRANSCRIPTION_INVOLVED_IN_G1_S_TRANSITION_OF_MITOTIC_CELL_CYCLE	Details ...	26	0.7555705	2.0324817	0.0	0.006830506	0.3	1066	tags=50%, list=4%, signal=52%
GO_DAMAGED_DNA_BINDING	GO_DAMAGED_DNA_BINDING	Details ...	62	0.59278095	2.0319276	0.0020283975	0.006775647	0.301	6173	tags=55%, list=21%, signal=69%
GO_MITOTIC_NUCLEAR_DIVISION	GO_MITOTIC_NUCLEAR_DIVISION	Details ...	343	0.5516653	2.0318496	0.0	0.0066828304	0.301	3729	tags=39%, list=13%, signal=44%
GO_SPINDLE_POLE	GO_SPINDLE_POLE	Details ...	114	0.567203	2.0305212	0.0019607844	0.006719865	0.304	2778	tags=38%, list=9%, signal=41%
GO_ENDODEOXYRIBONUCLEASE_ACTIVITY	GO_ENDODEOXYRIBONUCLEASE_ACTIVITY	Details ...	49	0.5582197	2.026917	0.0	0.00694097	0.312	4570	tags=43%, list=16%, signal=51%
GO_DNA_GEOMETRIC_CHANGE	GO_DNA_GEOMETRIC_CHANGE	Details ...	80	0.5945596	2.0265288	0.0020408162	0.006884121	0.315	4561	tags=43%, list=16%, signal=50%
GO_TRANSLESION_SYNTHESIS	GO_TRANSLESION_SYNTHESIS	Details ...	38	0.59912306	2.025085	0.001996008	0.0069701797	0.323	2954	tags=37%, list=10%, signal=41%
GO_CENTROSOME_DUPLICATION	GO_CENTROSOME_DUPLICATION	Details ...	32	0.67854095	2.022823	0.0019047619	0.007132265	0.332	1621	tags=38%, list=6%, signal=40%
GO_PROTEIN_DNA_COMPLEX_SUBUNIT_ORGANIZATION	GO_PROTEIN_DNA_COMPLEX_SUBUNIT_ORGANIZATION	Details ...	206	0.5236803	2.0149555	0.0	0.007687797	0.356	5132	tags=38%, list=17%, signal=46%
GO_SPINDLE	GO_SPINDLE	Details ...	267	0.5153051	2.012136	0.0	0.007922222	0.362	2778	tags=32%, list=9%, signal=35%
GO_MEIOTIC_CHROMOSOME_SEGREGATION	GO_MEIOTIC_CHROMOSOME_SEGREGATION	Details ...	56	0.5587826	2.0094843	0.0	0.008095857	0.37	5190	tags=45%, list=18%, signal=54%
GO_DNA_HELICASE_ACTIVITY	GO_DNA_HELICASE_ACTIVITY	Details ...	53	0.6450295	2.0003026	0.001984127	0.008808706	0.387	1829	tags=42%, list=6%, signal=44%
GO_SINGLE_STRANDED_DNA_BINDING	GO_SINGLE_STRANDED_DNA_BINDING	Details ...	84	0.5551342	1.9995328	0.004149378	0.008827364	0.389	4518	tags=37%, list=15%, signal=43%
GO_CHROMATIN_REMODELING	GO_CHROMATIN_REMODELING	Details ...	142	0.5312443	1.9923509	0.0	0.009569953	0.402	6858	tags=47%, list=23%, signal=61%
GO_REGULATION_OF_SIGNAL_TRANSDUCTION_BY_P53_CLASS_MEDIATOR	GO_REGULATION_OF_SIGNAL_TRANSDUCTION_BY_P53_CLASS_MEDIATOR	Details ...	157	0.500884	1.992203	0.0	0.009480919	0.403	6200	tags=41%, list=21%, signal=52%
GO_MITOTIC_SISTER_CHROMATID_SEGREGATION	GO_MITOTIC_SISTER_CHROMATID_SEGREGATION	Details ...	87	0.62725437	1.9921516	0.0019880715	0.009389944	0.403	1673	tags=41%, list=6%, signal=44%
GO_NEGATIVE_REGULATION_OF_CHROMOSOME_SEGREGATION	GO_NEGATIVE_REGULATION_OF_CHROMOSOME_SEGREGATION	Details ...	26	0.6732361	1.9838217	0.001968504	0.010381261	0.436	1650	tags=38%, list=6%, signal=41%
GO_NEGATIVE_REGULATION_OF_CELL_CYCLE_PROCESS	GO_NEGATIVE_REGULATION_OF_CELL_CYCLE_PROCESS	Details ...	200	0.47363085	1.982727	0.0	0.010407103	0.44	3444	tags=30%, list=12%, signal=34%
GO_NEGATIVE_REGULATION_OF_MITOTIC_NUCLEAR_DIVISION	GO_NEGATIVE_REGULATION_OF_MITOTIC_NUCLEAR_DIVISION	Details ...	32	0.63146335	1.9782767	0.0	0.010925862	0.455	2565	tags=38%, list=9%, signal=41%
GO_NUCLEOTIDE_EXCISION_REPAIR_DNA_GAP_FILLING	GO_NUCLEOTIDE_EXCISION_REPAIR_DNA_GAP_FILLING	Details ...	24	0.6872235	1.9746001	0.0019762847	0.011263685	0.464	2954	tags=54%, list=10%, signal=60%
GO_FOUR_WAY_JUNCTION_DNA_BINDING	GO_FOUR_WAY_JUNCTION_DNA_BINDING	Details ...	15	0.78789383	1.96827	0.0	0.012074462	0.475	4518	tags=80%, list=15%, signal=94%
GO_RECIPROCAL_DNA_RECOMBINATION	GO_RECIPROCAL_DNA_RECOMBINATION	Details ...	37	0.6130391	1.9672472	0.0	0.012128741	0.48	4518	tags=49%, list=15%, signal=57%
GO_MITOTIC_SPINDLE_ORGANIZATION	GO_MITOTIC_SPINDLE_ORGANIZATION	Details ...	64	0.6225217	1.9633074	0.0	0.012654078	0.489	2048	tags=39%, list=7%, signal=42%
GO_CELL_DIVISION	GO_CELL_DIVISION	Details ...	431	0.5033766	1.9618081	0.0	0.01273968	0.493	3713	tags=33%, list=13%, signal=37%
GO_SPINDLE_ASSEMBLY	GO_SPINDLE_ASSEMBLY	Details ...	67	0.5958877	1.9615327	0.0	0.012696061	0.496	1910	tags=36%, list=6%, signal=38%
GO_DNA_INTEGRITY_CHECKPOINT	GO_DNA_INTEGRITY_CHECKPOINT	Details ...	139	0.51550466	1.9601079	0.0	0.012803582	0.498	3301	tags=30%, list=11%, signal=34%
GO_REGULATION_OF_MICROTUBULE_BASED_PROCESS	GO_REGULATION_OF_MICROTUBULE_BASED_PROCESS	Details ...	226	0.5036566	1.9581625	0.0019569471	0.012932909	0.5	2655	tags=31%, list=9%, signal=33%
GO_MITOTIC_CELL_CYCLE_CHECKPOINT	GO_MITOTIC_CELL_CYCLE_CHECKPOINT	Details ...	131	0.5182996	1.9530511	0.0	0.013618127	0.514	2297	tags=28%, list=8%, signal=31%
GO_REGULATION_OF_CELL_CYCLE_CHECKPOINT	GO_REGULATION_OF_CELL_CYCLE_CHECKPOINT	Details ...	27	0.6385378	1.9516696	0.0020449897	0.013715682	0.519	4868	tags=48%, list=17%, signal=58%
GO_CHROMATIN_ASSEMBLY_OR_DISASSEMBLY	GO_CHROMATIN_ASSEMBLY_OR_DISASSEMBLY	Details ...	153	0.5326857	1.9513651	0.003816794	0.013635175	0.521	5132	tags=40%, list=17%, signal=48%
GO_CYCLIN_DEPENDENT_PROTEIN_SERINE_THREONINE_KINASE_REGULATOR_ACTIVITY	GO_CYCLIN_DEPENDENT_PROTEIN_SERINE_THREONINE_KINASE_REGULATOR_ACTIVITY	Details ...	27	0.5983217	1.9369041	0.0	0.016199853	0.57	7586	tags=56%, list=26%, signal=75%
GO_POSTREPLICATION_REPAIR	GO_POSTREPLICATION_REPAIR	Details ...	50	0.5637029	1.9339656	0.0020703934	0.016513838	0.571	2954	tags=36%, list=10%, signal=40%
GO_CENTROSOME	GO_CENTROSOME	Details ...	462	0.44710326	1.9327698	0.0	0.016592028	0.572	4465	tags=29%, list=15%, signal=34%
GO_CELL_CYCLE_G2_M_PHASE_TRANSITION	GO_CELL_CYCLE_G2_M_PHASE_TRANSITION	Details ...	135	0.51092273	1.9327497	0.0019607844	0.016448898	0.573	2539	tags=31%, list=9%, signal=34%
GO_CHROMOSOME_ORGANIZATION_INVOLVED_IN_MEIOTIC_CELL_CYCLE	GO_CHROMOSOME_ORGANIZATION_INVOLVED_IN_MEIOTIC_CELL_CYCLE	Details ...	44	0.5422455	1.9285724	0.0020283975	0.017018694	0.585	5190	tags=43%, list=18%, signal=52%
GO_TERMINATION_OF_RNA_POLYMERASE_II_TRANSCRIPTION	GO_TERMINATION_OF_RNA_POLYMERASE_II_TRANSCRIPTION	Details ...	61	0.5991875	1.9248812	0.0021276595	0.017643213	0.599	6026	tags=52%, list=20%, signal=66%
GO_REGULATION_OF_MICROTUBULE_POLYMERIZATION_OR_DEPOLYMERIZATION	GO_REGULATION_OF_MICROTUBULE_POLYMERIZATION_OR_DEPOLYMERIZATION	Details ...	164	0.5089608	1.9218268	0.0	0.018182054	0.61	2655	tags=30%, list=9%, signal=33%
GO_REGULATION_OF_DOUBLE_STRAND_BREAK_REPAIR	GO_REGULATION_OF_DOUBLE_STRAND_BREAK_REPAIR	Details ...	34	0.59657925	1.9176788	0.0020242915	0.018781709	0.62	4542	tags=44%, list=15%, signal=52%
GO_CENTRIOLE_ASSEMBLY	GO_CENTRIOLE_ASSEMBLY	Details ...	19	0.7188591	1.9136994	0.0038986355	0.0194492	0.626	1621	tags=42%, list=6%, signal=45%
GO_MICROTUBULE_MOTOR_ACTIVITY	GO_MICROTUBULE_MOTOR_ACTIVITY	Details ...	74	0.5167895	1.9097227	0.0	0.020134952	0.632	1673	tags=24%, list=6%, signal=26%
GO_NUCLEAR_UBIQUITIN_LIGASE_COMPLEX	GO_NUCLEAR_UBIQUITIN_LIGASE_COMPLEX	Details ...	39	0.58653945	1.907203	0.0	0.02050396	0.64	5601	tags=46%, list=19%, signal=57%
GO_NUCLEOSOME_BINDING	GO_NUCLEOSOME_BINDING	Details ...	44	0.59160733	1.9030302	0.0019607844	0.02120983	0.652	5733	tags=50%, list=19%, signal=62%
GO_SPINDLE_MICROTUBULE	GO_SPINDLE_MICROTUBULE	Details ...	56	0.5890415	1.9005178	0.004008016	0.021746915	0.658	2475	tags=39%, list=8%, signal=43%
GO_SOMATIC_DIVERSIFICATION_OF_IMMUNE_RECEPTORS	GO_SOMATIC_DIVERSIFICATION_OF_IMMUNE_RECEPTORS	Details ...	40	0.5547578	1.8975168	0.0	0.022283856	0.67	5937	tags=45%, list=20%, signal=56%
GO_OOCYTE_DIFFERENTIATION	GO_OOCYTE_DIFFERENTIATION	Details ...	33	0.5256797	1.8973515	0.0	0.022124361	0.672	6219	tags=39%, list=21%, signal=50%
GO_MITOTIC_DNA_INTEGRITY_CHECKPOINT	GO_MITOTIC_DNA_INTEGRITY_CHECKPOINT	Details ...	95	0.49841592	1.8956356	0.0059288535	0.022308158	0.681	6725	tags=44%, list=23%, signal=57%
GO_NUCLEAR_HETEROCHROMATIN	GO_NUCLEAR_HETEROCHROMATIN	Details ...	31	0.63378745	1.8933899	0.0038240917	0.022655793	0.69	5828	tags=52%, list=20%, signal=64%
GO_ESC_E_Z_COMPLEX	GO_ESC_E_Z_COMPLEX	Details ...	16	0.7599893	1.8931036	0.0	0.022501193	0.69	2981	tags=44%, list=10%, signal=49%
GO_DNA_REPLICATION_FACTOR_A_COMPLEX	GO_DNA_REPLICATION_FACTOR_A_COMPLEX	Details ...	15	0.65706325	1.8910335	0.0061728396	0.022776024	0.694	2961	tags=33%, list=10%, signal=37%
GO_REGULATION_OF_DNA_RECOMBINATION	GO_REGULATION_OF_DNA_RECOMBINATION	Details ...	53	0.53633666	1.8890104	0.009861933	0.023106962	0.701	2521	tags=34%, list=9%, signal=37%
GO_NEGATIVE_REGULATION_OF_HISTONE_METHYLATION	GO_NEGATIVE_REGULATION_OF_HISTONE_METHYLATION	Details ...	16	0.72138643	1.8836998	0.0	0.024234131	0.711	1861	tags=38%, list=6%, signal=40%
GO_PROTEIN_LOCALIZATION_TO_CHROMOSOME	GO_PROTEIN_LOCALIZATION_TO_CHROMOSOME	Details ...	38	0.58875346	1.881894	0.00967118	0.024519075	0.719	1411	tags=34%, list=5%, signal=36%
GO_FEMALE_MEIOTIC_DIVISION	GO_FEMALE_MEIOTIC_DIVISION	Details ...	24	0.58984685	1.8817573	0.00203666	0.024357745	0.72	1108	tags=33%, list=4%, signal=35%
GO_NUCLEIC_ACID_PHOSPHODIESTER_BOND_HYDROLYSIS	GO_NUCLEIC_ACID_PHOSPHODIESTER_BOND_HYDROLYSIS	Details ...	231	0.43892774	1.878745	0.0021008404	0.024938589	0.725	4570	tags=30%, list=16%, signal=35%
GO_CHROMATIN	GO_CHROMATIN	Details ...	399	0.45049	1.8772352	0.0058479533	0.0251593	0.734	5828	tags=36%, list=20%, signal=44%
GO_APOPTOTIC_NUCLEAR_CHANGES	GO_APOPTOTIC_NUCLEAR_CHANGES	Details ...	24	0.5708237	1.8700625	0.0	0.026905995	0.742	4630	tags=46%, list=16%, signal=54%
GO_MICROTUBULE_CYTOSKELETON_ORGANIZATION	GO_MICROTUBULE_CYTOSKELETON_ORGANIZATION	Details ...	317	0.46234655	1.8698117	0.003921569	0.026778644	0.742	1910	tags=24%, list=6%, signal=25%
GO_MICROTUBULE_POLYMERIZATION_OR_DEPOLYMERIZATION	GO_MICROTUBULE_POLYMERIZATION_OR_DEPOLYMERIZATION	Details ...	38	0.5789404	1.8665204	0.0038834952	0.027522529	0.753	2655	tags=37%, list=9%, signal=40%
GO_REGULATION_OF_CENTROSOME_CYCLE	GO_REGULATION_OF_CENTROSOME_CYCLE	Details ...	38	0.5960582	1.865747	0.00203666	0.027538786	0.754	2425	tags=42%, list=8%, signal=46%
GO_POSITIVE_REGULATION_OF_CHROMOSOME_SEGREGATION	GO_POSITIVE_REGULATION_OF_CHROMOSOME_SEGREGATION	Details ...	23	0.64728993	1.8615016	0.006085193	0.028591137	0.765	4177	tags=52%, list=14%, signal=61%
GO_CHROMOSOME_SEPARATION	GO_CHROMOSOME_SEPARATION	Details ...	18	0.68557346	1.8569088	0.002008032	0.029766133	0.774	1680	tags=44%, list=6%, signal=47%
GO_REGULATION_OF_CELL_DIVISION	GO_REGULATION_OF_CELL_DIVISION	Details ...	248	0.43373698	1.8546785	0.003921569	0.030200647	0.781	2609	tags=25%, list=9%, signal=27%
GO_NUCLEASE_ACTIVITY	GO_NUCLEASE_ACTIVITY	Details ...	186	0.41810274	1.8521101	0.0020661156	0.03071976	0.79	4570	tags=28%, list=16%, signal=33%
GO_NUCLEOTIDE_EXCISION_REPAIR_DNA_INCISION	GO_NUCLEOTIDE_EXCISION_REPAIR_DNA_INCISION	Details ...	39	0.570347	1.8499384	0.010438413	0.031247364	0.795	4542	tags=38%, list=15%, signal=45%
GO_STRUCTURE_SPECIFIC_DNA_BINDING	GO_STRUCTURE_SPECIFIC_DNA_BINDING	Details ...	113	0.48255008	1.846712	0.0038535646	0.03200593	0.803	9892	tags=59%, list=34%, signal=89%
GO_SPLICEOSOMAL_COMPLEX	GO_SPLICEOSOMAL_COMPLEX	Details ...	161	0.5226541	1.8464651	0.008583691	0.03186827	0.803	9865	tags=62%, list=34%, signal=93%
GO_KINESIN_COMPLEX	GO_KINESIN_COMPLEX	Details ...	52	0.54972047	1.8446008	0.005725191	0.03226088	0.805	1673	tags=31%, list=6%, signal=33%
GO_EXONUCLEASE_ACTIVITY	GO_EXONUCLEASE_ACTIVITY	Details ...	71	0.49339277	1.8364551	0.00625	0.03479711	0.821	4024	tags=30%, list=14%, signal=34%
GO_HISTONE_BINDING	GO_HISTONE_BINDING	Details ...	157	0.48945004	1.8359616	0.007858546	0.034683596	0.821	5132	tags=34%, list=17%, signal=41%
GO_HELICASE_ACTIVITY	GO_HELICASE_ACTIVITY	Details ...	151	0.51623744	1.8354397	0.00811359	0.034609362	0.824	5554	tags=40%, list=19%, signal=49%
GO_HOMOLOGOUS_CHROMOSOME_SEGREGATION	GO_HOMOLOGOUS_CHROMOSOME_SEGREGATION	Details ...	40	0.51623684	1.8350017	0.001996008	0.03447855	0.824	5190	tags=40%, list=18%, signal=49%
GO_MITOTIC_SPINDLE	GO_MITOTIC_SPINDLE	Details ...	50	0.5680689	1.8340803	0.007707129	0.034480695	0.826	1673	tags=36%, list=6%, signal=38%
GO_DNA_DAMAGE_RESPONSE_SIGNAL_TRANSDUCTION_RESULTING_IN_TRANSCRIPTION	GO_DNA_DAMAGE_RESPONSE_SIGNAL_TRANSDUCTION_RESULTING_IN_TRANSCRIPTION	Details ...	15	0.6486887	1.8335013	0.003992016	0.03442187	0.826	2045	tags=40%, list=7%, signal=43%
GO_HISTONE_PHOSPHORYLATION	GO_HISTONE_PHOSPHORYLATION	Details ...	25	0.6484244	1.8333609	0.0019493178	0.03424344	0.826	3675	tags=48%, list=12%, signal=55%
GO_REGULATION_OF_MRNA_SPLICING_VIA_SPLICEOSOME	GO_REGULATION_OF_MRNA_SPLICING_VIA_SPLICEOSOME	Details ...	59	0.5622183	1.8315948	0.011952192	0.034608446	0.829	6091	tags=58%, list=21%, signal=73%
GO_DNA_TEMPLATED_TRANSCRIPTION_TERMINATION	GO_DNA_TEMPLATED_TRANSCRIPTION_TERMINATION	Details ...	98	0.5224055	1.8297892	0.016771488	0.035007786	0.831	6034	tags=44%, list=21%, signal=55%
GO_MITOTIC_SPINDLE_ASSEMBLY	GO_MITOTIC_SPINDLE_ASSEMBLY	Details ...	38	0.58677226	1.82848	0.0	0.03523949	0.834	1634	tags=34%, list=6%, signal=36%
GO_MRNA_3_END_PROCESSING	GO_MRNA_3_END_PROCESSING	Details ...	70	0.5372503	1.8277686	0.018828452	0.035263572	0.836	6026	tags=46%, list=20%, signal=57%
GO_SYNAPTONEMAL_COMPLEX	GO_SYNAPTONEMAL_COMPLEX	Details ...	31	0.5379336	1.8262247	0.004115226	0.035632547	0.839	1710	tags=29%, list=6%, signal=31%
GO_NEGATIVE_REGULATION_OF_PROTEIN_COMPLEX_DISASSEMBLY	GO_NEGATIVE_REGULATION_OF_PROTEIN_COMPLEX_DISASSEMBLY	Details ...	157	0.47671303	1.8241515	0.003968254	0.0360799	0.839	2501	tags=26%, list=9%, signal=28%
GO_POSITIVE_REGULATION_OF_NUCLEASE_ACTIVITY	GO_POSITIVE_REGULATION_OF_NUCLEASE_ACTIVITY	Details ...	15	0.62527835	1.8237374	0.010309278	0.035947274	0.841	2893	tags=27%, list=10%, signal=30%
GO_INO80_TYPE_COMPLEX	GO_INO80_TYPE_COMPLEX	Details ...	21	0.6046757	1.822873	0.010121457	0.036009707	0.843	7079	tags=52%, list=24%, signal=69%
GO_RIBONUCLEOPROTEIN_COMPLEX_LOCALIZATION	GO_RIBONUCLEOPROTEIN_COMPLEX_LOCALIZATION	Details ...	113	0.52927965	1.8225656	0.010460251	0.035844624	0.843	6641	tags=48%, list=23%, signal=61%
GO_HISTONE_KINASE_ACTIVITY	GO_HISTONE_KINASE_ACTIVITY	Details ...	19	0.6923402	1.8171595	0.0020120724	0.037468746	0.853	4745	tags=58%, list=16%, signal=69%
GO_MALE_MEIOSIS	GO_MALE_MEIOSIS	Details ...	32	0.55914694	1.8114089	0.0	0.039313335	0.867	5190	tags=44%, list=18%, signal=53%
GO_POSITIVE_REGULATION_OF_MITOTIC_CELL_CYCLE	GO_POSITIVE_REGULATION_OF_MITOTIC_CELL_CYCLE	Details ...	115	0.45641768	1.8075904	0.0019762847	0.040461298	0.875	4518	tags=35%, list=15%, signal=41%
GO_POSITIVE_REGULATION_OF_MITOTIC_NUCLEAR_DIVISION	GO_POSITIVE_REGULATION_OF_MITOTIC_NUCLEAR_DIVISION	Details ...	44	0.49357846	1.8060648	0.0	0.04075198	0.878	3947	tags=34%, list=13%, signal=39%
GO_CYCLIN_DEPENDENT_PROTEIN_KINASE_ACTIVITY	GO_CYCLIN_DEPENDENT_PROTEIN_KINASE_ACTIVITY	Details ...	34	0.5540628	1.8055971	0.001953125	0.04064965	0.878	7077	tags=50%, list=24%, signal=66%
GO_RESPONSE_TO_IONIZING_RADIATION	GO_RESPONSE_TO_IONIZING_RADIATION	Details ...	137	0.44854587	1.8053001	0.0020491802	0.040516585	0.878	4868	tags=34%, list=17%, signal=40%
GO_RNA_LOCALIZATION	GO_RNA_LOCALIZATION	Details ...	175	0.48796085	1.8045876	0.014403292	0.040521502	0.882	6641	tags=45%, list=23%, signal=58%
GO_NEGATIVE_REGULATION_OF_MITOTIC_CELL_CYCLE	GO_NEGATIVE_REGULATION_OF_MITOTIC_CELL_CYCLE	Details ...	185	0.44070223	1.8010386	0.008064516	0.04164909	0.888	2297	tags=23%, list=8%, signal=25%
GO_POSITIVE_REGULATION_OF_CELL_CYCLE_PROCESS	GO_POSITIVE_REGULATION_OF_CELL_CYCLE_PROCESS	Details ...	223	0.4353121	1.7969494	0.0	0.04296355	0.89	3589	tags=27%, list=12%, signal=31%
GO_RNA_SPLICING_VIA_TRANSESTERIFICATION_REACTIONS	GO_RNA_SPLICING_VIA_TRANSESTERIFICATION_REACTIONS	Details ...	258	0.48638445	1.7969191	0.01268499	0.042714987	0.89	6079	tags=41%, list=21%, signal=51%
GO_BASE_EXCISION_REPAIR	GO_BASE_EXCISION_REPAIR	Details ...	39	0.54299104	1.7968184	0.016032064	0.04249677	0.89	6399	tags=51%, list=22%, signal=65%
GO_EXONUCLEASE_ACTIVITY_ACTIVE_WITH_EITHER_RIBO_OR_DEOXYRIBONUCLEIC_ACIDS_AND_PRODUCING_5_PHOSPHOMONOESTERS	GO_EXONUCLEASE_ACTIVITY_ACTIVE_WITH_EITHER_RIBO_OR_DEOXYRIBONUCLEIC_ACIDS_AND_PRODUCING_5_PHOSPHOMONOESTERS	Details ...	40	0.5457315	1.7950399	0.012526096	0.04296953	0.892	2044	tags=30%, list=7%, signal=32%
GO_NUCLEAR_EXPORT	GO_NUCLEAR_EXPORT	Details ...	140	0.49073398	1.7949513	0.0061099795	0.04276703	0.892	4286	tags=36%, list=15%, signal=42%
GO_NUCLEAR_CHROMATIN	GO_NUCLEAR_CHROMATIN	Details ...	268	0.43390852	1.7945547	0.0059288535	0.0426372	0.892	7713	tags=42%, list=26%, signal=57%
GO_RNA_3_END_PROCESSING	GO_RNA_3_END_PROCESSING	Details ...	95	0.5102042	1.7919445	0.012847966	0.04342079	0.895	6026	tags=44%, list=20%, signal=55%
GO_REGULATION_OF_HISTONE_H3_K9_METHYLATION	GO_REGULATION_OF_HISTONE_H3_K9_METHYLATION	Details ...	16	0.65438133	1.7893888	0.0056926	0.04418574	0.898	4660	tags=44%, list=16%, signal=52%
GO_RNA_SPLICING	GO_RNA_SPLICING	Details ...	347	0.46666345	1.787494	0.010615711	0.044676755	0.902	6796	tags=42%, list=23%, signal=54%
GO_MICROTUBULE_ASSOCIATED_COMPLEX	GO_MICROTUBULE_ASSOCIATED_COMPLEX	Details ...	140	0.43611538	1.7851111	0.007707129	0.045364168	0.904	1673	tags=21%, list=6%, signal=22%
GO_REGULATION_OF_CYCLIN_DEPENDENT_PROTEIN_KINASE_ACTIVITY	GO_REGULATION_OF_CYCLIN_DEPENDENT_PROTEIN_KINASE_ACTIVITY	Details ...	94	0.41613567	1.7847961	0.0	0.04521117	0.904	3713	tags=29%, list=13%, signal=33%
GO_REGULATION_OF_CYTOKINESIS	GO_REGULATION_OF_CYTOKINESIS	Details ...	54	0.5081979	1.782724	0.011904762	0.045955047	0.905	1621	tags=26%, list=6%, signal=27%
GO_POSITIVE_REGULATION_OF_DNA_REPAIR	GO_POSITIVE_REGULATION_OF_DNA_REPAIR	Details ...	34	0.5404693	1.7814558	0.0125	0.046208683	0.906	4342	tags=35%, list=15%, signal=41%
GO_REGULATION_OF_ALTERNATIVE_MRNA_SPLICING_VIA_SPLICEOSOME	GO_REGULATION_OF_ALTERNATIVE_MRNA_SPLICING_VIA_SPLICEOSOME	Details ...	33	0.577926	1.781124	0.01026694	0.046088833	0.906	6079	tags=58%, list=21%, signal=72%
GO_NUCLEOBASE_CONTAINING_COMPOUND_TRANSPORT	GO_NUCLEOBASE_CONTAINING_COMPOUND_TRANSPORT	Details ...	188	0.44732535	1.7713871	0.010309278	0.050065205	0.914	6705	tags=42%, list=23%, signal=54%
GO_CAJAL_BODY	GO_CAJAL_BODY	Details ...	49	0.5330186	1.7704052	0.006355932	0.050178323	0.915	9283	tags=61%, list=32%, signal=89%
GO_ANAPHASE_PROMOTING_COMPLEX	GO_ANAPHASE_PROMOTING_COMPLEX	Details ...	20	0.6252039	1.7673496	0.014198783	0.0512941	0.918	5414	tags=55%, list=18%, signal=67%
GO_DNA_DAMAGE_RESPONSE_DETECTION_OF_DNA_DAMAGE	GO_DNA_DAMAGE_RESPONSE_DETECTION_OF_DNA_DAMAGE	Details ...	36	0.5833511	1.7627834	0.016494846	0.053091723	0.922	3301	tags=39%, list=11%, signal=44%
GO_REGULATION_OF_MITOTIC_CELL_CYCLE	GO_REGULATION_OF_MITOTIC_CELL_CYCLE	Details ...	442	0.3942732	1.7592077	0.004008016	0.054504447	0.927	5758	tags=31%, list=20%, signal=38%
GO_CHROMOSOME_LOCALIZATION	GO_CHROMOSOME_LOCALIZATION	Details ...	58	0.518671	1.7591087	0.014056225	0.054250497	0.927	2146	tags=33%, list=7%, signal=35%
GO_DNA_REPAIR_COMPLEX	GO_DNA_REPAIR_COMPLEX	Details ...	42	0.5226973	1.7580233	0.010548524	0.05443897	0.927	7031	tags=48%, list=24%, signal=62%
GO_CYTOKINESIS	GO_CYTOKINESIS	Details ...	80	0.4961503	1.7560427	0.012	0.055108372	0.927	2290	tags=26%, list=8%, signal=28%
GO_NEGATIVE_REGULATION_OF_CELL_CYCLE_PHASE_TRANSITION	GO_NEGATIVE_REGULATION_OF_CELL_CYCLE_PHASE_TRANSITION	Details ...	140	0.4279006	1.7555432	0.007889546	0.055039674	0.927	2994	tags=24%, list=10%, signal=27%
GO_ERROR_FREE_TRANSLESION_SYNTHESIS	GO_ERROR_FREE_TRANSLESION_SYNTHESIS	Details ...	18	0.6420524	1.7552406	0.012295082	0.054881684	0.928	1897	tags=39%, list=6%, signal=42%
GO_BLASTOCYST_GROWTH	GO_BLASTOCYST_GROWTH	Details ...	15	0.6564729	1.7546258	0.0140280565	0.05491661	0.931	5625	tags=60%, list=19%, signal=74%
GO_MICROTUBULE_BASED_PROCESS	GO_MICROTUBULE_BASED_PROCESS	Details ...	481	0.40456104	1.7545323	0.007662835	0.05466348	0.931	1910	tags=19%, list=6%, signal=20%
GO_MRNA_PROCESSING	GO_MRNA_PROCESSING	Details ...	402	0.44201976	1.7533025	0.012738854	0.054916196	0.935	6902	tags=41%, list=23%, signal=53%
GO_NEGATIVE_REGULATION_OF_CELLULAR_PROTEIN_CATABOLIC_PROCESS	GO_NEGATIVE_REGULATION_OF_CELLULAR_PROTEIN_CATABOLIC_PROCESS	Details ...	60	0.47577077	1.7515802	0.012219959	0.055413347	0.935	2701	tags=23%, list=9%, signal=26%
GO_SEX_CHROMOSOME	GO_SEX_CHROMOSOME	Details ...	26	0.6091119	1.7512236	0.010080645	0.05528224	0.935	6083	tags=62%, list=21%, signal=78%
GO_PROTEIN_SUMOYLATION	GO_PROTEIN_SUMOYLATION	Details ...	112	0.5084531	1.7454687	0.015904572	0.05779418	0.94	6616	tags=46%, list=22%, signal=60%
GO_SITE_OF_DOUBLE_STRAND_BREAK	GO_SITE_OF_DOUBLE_STRAND_BREAK	Details ...	29	0.55822426	1.7396847	0.015625	0.060213882	0.948	4868	tags=45%, list=17%, signal=54%
GO_NEGATIVE_REGULATION_OF_CELL_CYCLE	GO_NEGATIVE_REGULATION_OF_CELL_CYCLE	Details ...	404	0.37683785	1.736363	0.0	0.06153751	0.949	3304	tags=23%, list=11%, signal=25%
GO_SOMATIC_DIVERSIFICATION_OF_IMMUNOGLOBULINS	GO_SOMATIC_DIVERSIFICATION_OF_IMMUNOGLOBULINS	Details ...	28	0.52636707	1.7362449	0.010373444	0.061257772	0.949	5937	tags=43%, list=20%, signal=54%
GO_ATP_DEPENDENT_DNA_HELICASE_ACTIVITY	GO_ATP_DEPENDENT_DNA_HELICASE_ACTIVITY	Details ...	34	0.5817916	1.7340548	0.024193548	0.06200139	0.949	4187	tags=44%, list=14%, signal=51%
GO_PROTEIN_DNA_COMPLEX	GO_PROTEIN_DNA_COMPLEX	Details ...	147	0.48309773	1.732131	0.026694044	0.06264755	0.95	5540	tags=34%, list=19%, signal=42%
GO_SPLICEOSOMAL_COMPLEX_ASSEMBLY	GO_SPLICEOSOMAL_COMPLEX_ASSEMBLY	Details ...	52	0.5216146	1.7318194	0.021052632	0.06250396	0.95	9187	tags=67%, list=31%, signal=98%
GO_DNA_CATABOLIC_PROCESS_ENDONUCLEOLYTIC	GO_DNA_CATABOLIC_PROCESS_ENDONUCLEOLYTIC	Details ...	18	0.5647012	1.7310982	0.015238095	0.06257599	0.951	4387	tags=44%, list=15%, signal=52%
GO_NUCLEAR_SPECK	GO_NUCLEAR_SPECK	Details ...	188	0.43267375	1.7303953	0.010224949	0.06261931	0.951	7079	tags=40%, list=24%, signal=53%
GO_PROTEIN_LOCALIZATION_TO_CYTOSKELETON	GO_PROTEIN_LOCALIZATION_TO_CYTOSKELETON	Details ...	28	0.54334724	1.729773	0.015151516	0.06264638	0.951	1910	tags=25%, list=6%, signal=27%
GO_3_5_EXONUCLEASE_ACTIVITY	GO_3_5_EXONUCLEASE_ACTIVITY	Details ...	45	0.50669545	1.7293737	0.02016129	0.06251585	0.951	1603	tags=24%, list=5%, signal=26%
GO_METAPHASE_PLATE_CONGRESSION	GO_METAPHASE_PLATE_CONGRESSION	Details ...	41	0.5514682	1.7279348	0.030864198	0.062854245	0.952	2146	tags=37%, list=7%, signal=39%
GO_GAMMA_TUBULIN_COMPLEX	GO_GAMMA_TUBULIN_COMPLEX	Details ...	19	0.57523984	1.7278863	0.018072288	0.06256131	0.952	2496	tags=32%, list=8%, signal=34%
GO_MRNA_SPLICE_SITE_SELECTION	GO_MRNA_SPLICE_SITE_SELECTION	Details ...	26	0.56709325	1.7273874	0.012371134	0.06251564	0.954	8930	tags=73%, list=30%, signal=105%
GO_NEGATIVE_REGULATION_OF_CHROMOSOME_ORGANIZATION	GO_NEGATIVE_REGULATION_OF_CHROMOSOME_ORGANIZATION	Details ...	92	0.48698118	1.7273159	0.018292682	0.062237386	0.954	2689	tags=25%, list=9%, signal=27%
GO_REGULATION_OF_CELL_CYCLE_G2_M_PHASE_TRANSITION	GO_REGULATION_OF_CELL_CYCLE_G2_M_PHASE_TRANSITION	Details ...	57	0.4858498	1.725679	0.01192843	0.06282966	0.955	4695	tags=40%, list=16%, signal=48%
GO_REGULATION_OF_CELL_CYCLE_PHASE_TRANSITION	GO_REGULATION_OF_CELL_CYCLE_PHASE_TRANSITION	Details ...	310	0.39578596	1.7252613	0.006024096	0.062763646	0.955	5758	tags=30%, list=20%, signal=37%
GO_REGULATION_OF_UBIQUITIN_PROTEIN_LIGASE_ACTIVITY	GO_REGULATION_OF_UBIQUITIN_PROTEIN_LIGASE_ACTIVITY	Details ...	17	0.6084363	1.7248939	0.01863354	0.0626365	0.955	2382	tags=35%, list=8%, signal=38%
GO_NEGATIVE_REGULATION_OF_ORGANELLE_ORGANIZATION	GO_NEGATIVE_REGULATION_OF_ORGANELLE_ORGANIZATION	Details ...	361	0.39625102	1.7245351	0.007936508	0.062498074	0.955	2689	tags=20%, list=9%, signal=22%
GO_INTERCELLULAR_BRIDGE	GO_INTERCELLULAR_BRIDGE	Details ...	40	0.46963564	1.7235345	0.005964215	0.06270766	0.956	7864	tags=52%, list=27%, signal=72%
GO_CILIARY_BASAL_BODY	GO_CILIARY_BASAL_BODY	Details ...	74	0.46492183	1.7218181	0.019607844	0.0633088	0.958	4728	tags=30%, list=16%, signal=35%
GO_SAGA_TYPE_COMPLEX	GO_SAGA_TYPE_COMPLEX	Details ...	30	0.5559733	1.7199355	0.014373717	0.063953444	0.958	6135	tags=53%, list=21%, signal=67%
GO_NON_RECOMBINATIONAL_REPAIR	GO_NON_RECOMBINATIONAL_REPAIR	Details ...	65	0.48595423	1.7191752	0.014141414	0.06400122	0.958	7190	tags=43%, list=24%, signal=57%
GO_NCRNA_CATABOLIC_PROCESS	GO_NCRNA_CATABOLIC_PROCESS	Details ...	22	0.5646367	1.7170781	0.019027485	0.06476572	0.963	5217	tags=41%, list=18%, signal=50%
GO_REGULATION_OF_RESPONSE_TO_DNA_DAMAGE_STIMULUS	GO_REGULATION_OF_RESPONSE_TO_DNA_DAMAGE_STIMULUS	Details ...	136	0.41964474	1.7169715	0.014344262	0.06452617	0.963	6200	tags=35%, list=21%, signal=45%
GO_POSITIVE_REGULATION_OF_NUCLEAR_DIVISION	GO_POSITIVE_REGULATION_OF_NUCLEAR_DIVISION	Details ...	55	0.44226336	1.7159315	0.00390625	0.06475178	0.965	3947	tags=31%, list=13%, signal=36%
GO_OOGENESIS	GO_OOGENESIS	Details ...	57	0.43587044	1.7146978	0.008080808	0.065051496	0.965	9136	tags=46%, list=31%, signal=66%
GO_HISTONE_METHYLTRANSFERASE_COMPLEX	GO_HISTONE_METHYLTRANSFERASE_COMPLEX	Details ...	64	0.5281749	1.7142693	0.020661157	0.06497477	0.965	5769	tags=44%, list=20%, signal=54%
GO_POSITIVE_REGULATION_OF_CYTOKINESIS	GO_POSITIVE_REGULATION_OF_CYTOKINESIS	Details ...	26	0.5847383	1.7129589	0.017892644	0.06527438	0.966	1598	tags=35%, list=5%, signal=37%
GO_METHYLTRANSFERASE_COMPLEX	GO_METHYLTRANSFERASE_COMPLEX	Details ...	83	0.513729	1.710763	0.020920502	0.06609932	0.968	5769	tags=43%, list=20%, signal=54%
GO_MITOTIC_G2_M_TRANSITION_CHECKPOINT	GO_MITOTIC_G2_M_TRANSITION_CHECKPOINT	Details ...	18	0.5917312	1.7078432	0.010183299	0.067339264	0.97	5625	tags=50%, list=19%, signal=62%
GO_POSITIVE_REGULATION_OF_CELL_CYCLE_PHASE_TRANSITION	GO_POSITIVE_REGULATION_OF_CELL_CYCLE_PHASE_TRANSITION	Details ...	65	0.468925	1.7037916	0.023012552	0.0692263	0.971	4518	tags=37%, list=15%, signal=44%
GO_POSITIVE_REGULATION_OF_CELL_CYCLE	GO_POSITIVE_REGULATION_OF_CELL_CYCLE	Details ...	304	0.38630593	1.7037675	0.0019723866	0.068923816	0.971	4518	tags=27%, list=15%, signal=31%
GO_CATALYTIC_STEP_2_SPLICEOSOME	GO_CATALYTIC_STEP_2_SPLICEOSOME	Details ...	84	0.5326912	1.703305	0.035196688	0.068877555	0.971	8930	tags=61%, list=30%, signal=87%
GO_U2_TYPE_PRESPLICEOSOME	GO_U2_TYPE_PRESPLICEOSOME	Details ...	16	0.6491385	1.6997387	0.012345679	0.0704952	0.974	5279	tags=69%, list=18%, signal=84%
GO_CELLULAR_COMPONENT_DISASSEMBLY_INVOLVED_IN_EXECUTION_PHASE_OF_APOPTOSIS	GO_CELLULAR_COMPONENT_DISASSEMBLY_INVOLVED_IN_EXECUTION_PHASE_OF_APOPTOSIS	Details ...	41	0.45230362	1.6990014	0.005988024	0.070558235	0.974	4630	tags=34%, list=16%, signal=40%
GO_DNA_ALKYLATION	GO_DNA_ALKYLATION	Details ...	42	0.49264148	1.6983805	0.009765625	0.07057477	0.974	6219	tags=40%, list=21%, signal=51%
GO_MULTI_ORGANISM_LOCALIZATION	GO_MULTI_ORGANISM_LOCALIZATION	Details ...	65	0.49441743	1.6977515	0.024896266	0.07059498	0.974	2948	tags=34%, list=10%, signal=38%
GO_PURINE_NTP_DEPENDENT_HELICASE_ACTIVITY	GO_PURINE_NTP_DEPENDENT_HELICASE_ACTIVITY	Details ...	97	0.48751554	1.6974335	0.022357723	0.07046591	0.974	9712	tags=60%, list=33%, signal=89%
GO_SIGNAL_TRANSDUCTION_IN_RESPONSE_TO_DNA_DAMAGE	GO_SIGNAL_TRANSDUCTION_IN_RESPONSE_TO_DNA_DAMAGE	Details ...	92	0.44570625	1.6968595	0.024640657	0.07044741	0.974	7496	tags=40%, list=25%, signal=54%
GO_NUCLEAR_PERIPHERY	GO_NUCLEAR_PERIPHERY	Details ...	118	0.4489817	1.6965654	0.012	0.07029384	0.974	7265	tags=46%, list=25%, signal=61%
GO_SOMATIC_CELL_DNA_RECOMBINATION	GO_SOMATIC_CELL_DNA_RECOMBINATION	Details ...	32	0.5304177	1.6924945	0.028397566	0.07219578	0.976	5937	tags=47%, list=20%, signal=59%
GO_REGULATION_OF_DNA_METABOLIC_PROCESS	GO_REGULATION_OF_DNA_METABOLIC_PROCESS	Details ...	320	0.398147	1.6904427	0.012024048	0.072993584	0.976	5937	tags=31%, list=20%, signal=39%
GO_NEGATIVE_REGULATION_OF_CYTOSKELETON_ORGANIZATION	GO_NEGATIVE_REGULATION_OF_CYTOSKELETON_ORGANIZATION	Details ...	206	0.4213057	1.6885794	0.0140280565	0.073656164	0.977	2501	tags=23%, list=9%, signal=25%
GO_MITOTIC_CYTOKINESIS	GO_MITOTIC_CYTOKINESIS	Details ...	30	0.58886105	1.6881032	0.03846154	0.07363128	0.977	2290	tags=33%, list=8%, signal=36%
GO_CHROMATIN_MODIFICATION	GO_CHROMATIN_MODIFICATION	Details ...	496	0.41890663	1.6869926	0.018255578	0.07389286	0.977	6916	tags=36%, list=24%, signal=47%
GO_HISTONE_DEUBIQUITINATION	GO_HISTONE_DEUBIQUITINATION	Details ...	21	0.5559693	1.6866865	0.020283977	0.0737111	0.977	7269	tags=43%, list=25%, signal=57%
GO_MEMBRANE_DISASSEMBLY	GO_MEMBRANE_DISASSEMBLY	Details ...	44	0.56541854	1.6850609	0.032128513	0.07428274	0.978	6616	tags=59%, list=22%, signal=76%
GO_CYTOSKELETON_DEPENDENT_CYTOKINESIS	GO_CYTOSKELETON_DEPENDENT_CYTOKINESIS	Details ...	38	0.55789655	1.6850275	0.04208417	0.0739874	0.978	2290	tags=32%, list=8%, signal=34%
GO_ENDONUCLEASE_ACTIVITY	GO_ENDONUCLEASE_ACTIVITY	Details ...	116	0.3862648	1.6848146	0.016597511	0.07381154	0.978	4570	tags=27%, list=16%, signal=32%
GO_REGULATION_OF_MRNA_METABOLIC_PROCESS	GO_REGULATION_OF_MRNA_METABOLIC_PROCESS	Details ...	111	0.46887353	1.6841867	0.021008404	0.073885	0.978	6091	tags=42%, list=21%, signal=53%
GO_ATP_DEPENDENT_MICROTUBULE_MOTOR_ACTIVITY	GO_ATP_DEPENDENT_MICROTUBULE_MOTOR_ACTIVITY	Details ...	17	0.6424349	1.6830931	0.019493178	0.07421868	0.978	1598	tags=35%, list=5%, signal=37%
GO_MICROTUBULE_PLUS_END	GO_MICROTUBULE_PLUS_END	Details ...	16	0.64371985	1.6801662	0.013358778	0.07564982	0.979	2496	tags=31%, list=8%, signal=34%
GO_TELOMERE_MAINTENANCE_VIA_TELOMERE_LENGTHENING	GO_TELOMERE_MAINTENANCE_VIA_TELOMERE_LENGTHENING	Details ...	26	0.50921637	1.6798248	0.0139442235	0.07550982	0.979	2765	tags=31%, list=9%, signal=34%
GO_PRESPLICEOSOME	GO_PRESPLICEOSOME	Details ...	21	0.6125821	1.6735996	0.02736842	0.07869788	0.981	7969	tags=76%, list=27%, signal=104%
GO_METHYLATED_HISTONE_BINDING	GO_METHYLATED_HISTONE_BINDING	Details ...	45	0.50853556	1.6716912	0.029880479	0.079426	0.981	4561	tags=33%, list=16%, signal=39%
GO_NEGATIVE_REGULATION_OF_DNA_RECOMBINATION	GO_NEGATIVE_REGULATION_OF_DNA_RECOMBINATION	Details ...	15	0.6081365	1.67141	0.02053388	0.07931013	0.981	1829	tags=40%, list=6%, signal=43%
GO_PEPTIDYL_LYSINE_MODIFICATION	GO_PEPTIDYL_LYSINE_MODIFICATION	Details ...	285	0.42825347	1.6685784	0.03258656	0.08069338	0.982	8162	tags=44%, list=28%, signal=60%
GO_NEGATIVE_REGULATION_OF_MRNA_SPLICING_VIA_SPLICEOSOME	GO_NEGATIVE_REGULATION_OF_MRNA_SPLICING_VIA_SPLICEOSOME	Details ...	19	0.63149136	1.6661462	0.030674847	0.08180324	0.982	6091	tags=74%, list=21%, signal=93%
GO_NUCLEOSIDE_SALVAGE	GO_NUCLEOSIDE_SALVAGE	Details ...	16	0.58054495	1.6635519	0.014056225	0.08315709	0.982	6527	tags=50%, list=22%, signal=64%
GO_DNA_LIGATION	GO_DNA_LIGATION	Details ...	16	0.5998926	1.6600853	0.025586354	0.08492622	0.984	2052	tags=38%, list=7%, signal=40%
GO_NEGATIVE_REGULATION_OF_GENE_EXPRESSION_EPIGENETIC	GO_NEGATIVE_REGULATION_OF_GENE_EXPRESSION_EPIGENETIC	Details ...	92	0.47518945	1.6597116	0.035856575	0.08476968	0.984	5828	tags=34%, list=20%, signal=42%
GO_DNA_REPLICATION_DEPENDENT_NUCLEOSOME_ORGANIZATION	GO_DNA_REPLICATION_DEPENDENT_NUCLEOSOME_ORGANIZATION	Details ...	26	0.62863934	1.6543874	0.050200805	0.0877533	0.986	3331	tags=35%, list=11%, signal=39%
GO_REGULATION_OF_CELL_CYCLE_ARREST	GO_REGULATION_OF_CELL_CYCLE_ARREST	Details ...	100	0.40268955	1.6487925	0.01908397	0.09110947	0.99	3304	tags=24%, list=11%, signal=27%
GO_MRNA_CIS_SPLICING_VIA_SPLICEOSOME	GO_MRNA_CIS_SPLICING_VIA_SPLICEOSOME	Details ...	17	0.5881229	1.6480377	0.03757829	0.09122759	0.99	6053	tags=59%, list=21%, signal=74%
GO_REGULATION_OF_PROTEIN_COMPLEX_DISASSEMBLY	GO_REGULATION_OF_PROTEIN_COMPLEX_DISASSEMBLY	Details ...	203	0.41065148	1.6479028	0.017681729	0.09096031	0.99	2501	tags=22%, list=9%, signal=24%
GO_G1_DNA_DAMAGE_CHECKPOINT	GO_G1_DNA_DAMAGE_CHECKPOINT	Details ...	69	0.43896964	1.646681	0.02952756	0.09141727	0.991	6725	tags=39%, list=23%, signal=51%
GO_NEGATIVE_REGULATION_OF_MRNA_METABOLIC_PROCESS	GO_NEGATIVE_REGULATION_OF_MRNA_METABOLIC_PROCESS	Details ...	34	0.53252506	1.6445407	0.05383023	0.092476495	0.992	6769	tags=56%, list=23%, signal=73%
GO_NEGATIVE_REGULATION_OF_DNA_DEPENDENT_DNA_REPLICATION	GO_NEGATIVE_REGULATION_OF_DNA_DEPENDENT_DNA_REPLICATION	Details ...	16	0.6001935	1.6444638	0.020449897	0.0921628	0.992	8003	tags=63%, list=27%, signal=86%
GO_NUCLEAR_BODY	GO_NUCLEAR_BODY	Details ...	334	0.39133352	1.6439234	0.018480493	0.09213452	0.992	6777	tags=35%, list=23%, signal=45%
GO_RESPONSE_TO_UV	GO_RESPONSE_TO_UV	Details ...	121	0.38714725	1.6430117	0.010351967	0.09237943	0.992	3058	tags=21%, list=10%, signal=23%
GO_REGULATION_OF_HISTONE_H3_K4_METHYLATION	GO_REGULATION_OF_HISTONE_H3_K4_METHYLATION	Details ...	24	0.54447365	1.6416323	0.023809524	0.09288642	0.992	2693	tags=29%, list=9%, signal=32%
GO_REGULATION_OF_GENE_EXPRESSION_EPIGENETIC	GO_REGULATION_OF_GENE_EXPRESSION_EPIGENETIC	Details ...	201	0.40596297	1.640977	0.024	0.092937835	0.992	7049	tags=34%, list=24%, signal=45%
GO_POSITIVE_REGULATION_OF_DNA_METABOLIC_PROCESS	GO_POSITIVE_REGULATION_OF_DNA_METABOLIC_PROCESS	Details ...	175	0.39857182	1.6407081	0.029761905	0.0927838	0.992	5483	tags=30%, list=19%, signal=36%
GO_LYSINE_ACETYLATED_HISTONE_BINDING	GO_LYSINE_ACETYLATED_HISTONE_BINDING	Details ...	15	0.67843735	1.6396688	0.02964427	0.09320301	0.992	5573	tags=60%, list=19%, signal=74%
GO_EXECUTION_PHASE_OF_APOPTOSIS	GO_EXECUTION_PHASE_OF_APOPTOSIS	Details ...	53	0.41117525	1.63964	0.01	0.09286874	0.992	4630	tags=30%, list=16%, signal=36%
GO_POSITIVE_REGULATION_OF_HISTONE_METHYLATION	GO_POSITIVE_REGULATION_OF_HISTONE_METHYLATION	Details ...	28	0.55670273	1.6393199	0.035714287	0.09270374	0.992	4785	tags=39%, list=16%, signal=47%
GO_NUCLEOSOMAL_DNA_BINDING	GO_NUCLEOSOMAL_DNA_BINDING	Details ...	29	0.569252	1.6367661	0.03992016	0.09403784	0.992	8938	tags=62%, list=30%, signal=89%
GO_SYNAPSIS	GO_SYNAPSIS	Details ...	31	0.47128937	1.6352859	0.020449897	0.094582915	0.992	5992	tags=39%, list=20%, signal=49%
GO_MICROTUBULE_POLYMERIZATION	GO_MICROTUBULE_POLYMERIZATION	Details ...	26	0.5344117	1.6345474	0.032818533	0.09471103	0.992	1910	tags=31%, list=6%, signal=33%
GO_TRNA_TRANSPORT	GO_TRNA_TRANSPORT	Details ...	32	0.6033546	1.633613	0.06286837	0.09494633	0.992	6616	tags=63%, list=22%, signal=81%
GO_REGULATION_OF_MEIOTIC_NUCLEAR_DIVISION	GO_REGULATION_OF_MEIOTIC_NUCLEAR_DIVISION	Details ...	27	0.4808227	1.6331592	0.007984032	0.09491876	0.992	2152	tags=26%, list=7%, signal=28%
GO_REGULATION_OF_HISTONE_METHYLATION	GO_REGULATION_OF_HISTONE_METHYLATION	Details ...	50	0.49554154	1.6326547	0.029880479	0.0949172	0.992	4785	tags=30%, list=16%, signal=36%
GO_SWI_SNF_SUPERFAMILY_TYPE_COMPLEX	GO_SWI_SNF_SUPERFAMILY_TYPE_COMPLEX	Details ...	71	0.45327973	1.6268339	0.032	0.09842701	0.993	7079	tags=42%, list=24%, signal=56%
GO_DNA_METHYLATION_OR_DEMETHYLATION	GO_DNA_METHYLATION_OR_DEMETHYLATION	Details ...	55	0.43951544	1.6248741	0.021442495	0.09938853	0.993	6219	tags=36%, list=21%, signal=46%
GO_NEGATIVE_REGULATION_OF_CELL_CYCLE_G2_M_PHASE_TRANSITION	GO_NEGATIVE_REGULATION_OF_CELL_CYCLE_G2_M_PHASE_TRANSITION	Details ...	24	0.5019873	1.6166986	0.016194332	0.104648165	0.994	3301	tags=33%, list=11%, signal=38%
GO_APOPTOTIC_DNA_FRAGMENTATION	GO_APOPTOTIC_DNA_FRAGMENTATION	Details ...	15	0.5596281	1.6154511	0.022727273	0.10517276	0.995	4387	tags=47%, list=15%, signal=55%
GO_REGULATION_OF_RNA_SPLICING	GO_REGULATION_OF_RNA_SPLICING	Details ...	91	0.44105184	1.6153114	0.03265306	0.10490171	0.995	6183	tags=43%, list=21%, signal=54%
GO_NEGATIVE_REGULATION_OF_CIRCADIAN_RHYTHM	GO_NEGATIVE_REGULATION_OF_CIRCADIAN_RHYTHM	Details ...	16	0.5812026	1.6150416	0.013435701	0.104729176	0.995	8502	tags=63%, list=29%, signal=88%
GO_NF_KAPPAB_BINDING	GO_NF_KAPPAB_BINDING	Details ...	30	0.4773675	1.6141913	0.038854804	0.10490502	0.995	3862	tags=27%, list=13%, signal=31%
GO_ENDONUCLEASE_ACTIVITY_ACTIVE_WITH_EITHER_RIBO_OR_DEOXYRIBONUCLEIC_ACIDS_AND_PRODUCING_5_PHOSPHOMONOESTERS	GO_ENDONUCLEASE_ACTIVITY_ACTIVE_WITH_EITHER_RIBO_OR_DEOXYRIBONUCLEIC_ACIDS_AND_PRODUCING_5_PHOSPHOMONOESTERS		34	0.4951648	1.6140404	0.03305785	0.10462755	0.995	7885	tags=44%, list=27%, signal=60%
GO_NUCLEOTIDE_EXCISION_REPAIR_PREINCISION_COMPLEX_STABILIZATION	GO_NUCLEOTIDE_EXCISION_REPAIR_PREINCISION_COMPLEX_STABILIZATION		21	0.54385805	1.6135222	0.039473683	0.10462731	0.995	4109	tags=29%, list=14%, signal=33%
GO_U2_TYPE_SPLICEOSOMAL_COMPLEX	GO_U2_TYPE_SPLICEOSOMAL_COMPLEX		28	0.5485478	1.6134253	0.048117153	0.10431741	0.995	8518	tags=61%, list=29%, signal=85%
GO_ENDONUCLEASE_ACTIVITY_ACTIVE_WITH_EITHER_RIBO_OR_DEOXYRIBONUCLEIC_ACIDS_AND_PRODUCING_3_PHOSPHOMONOESTERS	GO_ENDONUCLEASE_ACTIVITY_ACTIVE_WITH_EITHER_RIBO_OR_DEOXYRIBONUCLEIC_ACIDS_AND_PRODUCING_3_PHOSPHOMONOESTERS		18	0.54139096	1.6122854	0.036885247	0.1047964	0.995	3813	tags=39%, list=13%, signal=45%
GO_REGULATION_OF_DNA_TEMPLATED_TRANSCRIPTION_ELONGATION	GO_REGULATION_OF_DNA_TEMPLATED_TRANSCRIPTION_ELONGATION		38	0.4632349	1.6094741	0.042857144	0.10647242	0.995	7397	tags=45%, list=25%, signal=60%
GO_ACETYLTRANSFERASE_COMPLEX	GO_ACETYLTRANSFERASE_COMPLEX		86	0.46247342	1.6083673	0.059183672	0.10689948	0.995	7210	tags=47%, list=25%, signal=61%
GO_MOTOR_ACTIVITY	GO_MOTOR_ACTIVITY		128	0.38565978	1.6030275	0.019455252	0.11050983	0.995	2559	tags=19%, list=9%, signal=20%
GO_SPINDLE_MIDZONE	GO_SPINDLE_MIDZONE		25	0.578464	1.600905	0.062	0.1116552	0.996	1598	tags=44%, list=5%, signal=46%
GO_DNA_MODIFICATION	GO_DNA_MODIFICATION		75	0.39696822	1.5996213	0.01417004	0.112139635	0.996	9258	tags=45%, list=31%, signal=66%
GO_POSITIVE_REGULATION_OF_RESPONSE_TO_DNA_DAMAGE_STIMULUS	GO_POSITIVE_REGULATION_OF_RESPONSE_TO_DNA_DAMAGE_STIMULUS		59	0.42576578	1.5962447	0.012658228	0.114260934	0.996	4342	tags=27%, list=15%, signal=32%
GO_PROTEIN_ACETYLATION	GO_PROTEIN_ACETYLATION		113	0.41290492	1.5933263	0.041322313	0.11601428	0.996	5981	tags=35%, list=20%, signal=43%
GO_SPINDLE_LOCALIZATION	GO_SPINDLE_LOCALIZATION		37	0.51633126	1.5896578	0.04509804	0.11854515	0.996	1909	tags=32%, list=6%, signal=35%
GO_REGULATION_OF_DNA_REPLICATION	GO_REGULATION_OF_DNA_REPLICATION		155	0.40381	1.5893358	0.04024145	0.11837956	0.996	3452	tags=23%, list=12%, signal=26%
GO_DSRNA_FRAGMENTATION	GO_DSRNA_FRAGMENTATION		18	0.56291974	1.5892372	0.035928145	0.11805099	0.996	7729	tags=61%, list=26%, signal=83%
GO_RNA_SPLICING_VIA_ENDONUCLEOLYTIC_CLEAVAGE_AND_LIGATION	GO_RNA_SPLICING_VIA_ENDONUCLEOLYTIC_CLEAVAGE_AND_LIGATION		15	0.5847343	1.5865927	0.050632913	0.119694725	0.996	3994	tags=33%, list=14%, signal=39%
GO_PROTEIN_LOCALIZATION_TO_CENTROSOME	GO_PROTEIN_LOCALIZATION_TO_CENTROSOME		15	0.6049535	1.5862668	0.034836065	0.11954822	0.996	1910	tags=33%, list=6%, signal=36%
GO_BLASTOCYST_DEVELOPMENT	GO_BLASTOCYST_DEVELOPMENT		57	0.42059517	1.584893	0.028	0.12016138	0.996	5992	tags=37%, list=20%, signal=46%
GO_NEGATIVE_REGULATION_OF_MEIOTIC_CELL_CYCLE	GO_NEGATIVE_REGULATION_OF_MEIOTIC_CELL_CYCLE		17	0.5316002	1.5822226	0.034883723	0.12189712	0.996	762	tags=24%, list=3%, signal=24%
GO_POSITIVE_REGULATION_OF_CELL_CYCLE_ARREST	GO_POSITIVE_REGULATION_OF_CELL_CYCLE_ARREST		80	0.40558052	1.5819296	0.034883723	0.12174927	0.996	3301	tags=23%, list=11%, signal=25%
GO_TRANSCRIPTION_COUPLED_NUCLEOTIDE_EXCISION_REPAIR	GO_TRANSCRIPTION_COUPLED_NUCLEOTIDE_EXCISION_REPAIR		72	0.45414537	1.5797763	0.05042017	0.12292972	0.996	4545	tags=31%, list=15%, signal=36%
GO_PROTEIN_DEPOLYMERIZATION	GO_PROTEIN_DEPOLYMERIZATION		23	0.49260208	1.5786973	0.041121494	0.12346146	0.996	3718	tags=30%, list=13%, signal=35%
GO_MICROTUBULE_END	GO_MICROTUBULE_END		21	0.5536524	1.5774868	0.04761905	0.12393408	0.996	2496	tags=29%, list=8%, signal=31%
GO_NUCLEAR_MATRIX	GO_NUCLEAR_MATRIX		95	0.420855	1.5759268	0.044715445	0.124850154	0.996	5205	tags=36%, list=18%, signal=43%
GO_SIGNAL_TRANSDUCTION_BY_P53_CLASS_MEDIATOR	GO_SIGNAL_TRANSDUCTION_BY_P53_CLASS_MEDIATOR		120	0.38267577	1.574473	0.04411765	0.12563975	0.996	3055	tags=18%, list=10%, signal=20%
GO_GENE_SILENCING	GO_GENE_SILENCING		183	0.4058816	1.5742999	0.059760958	0.12537688	0.996	6667	tags=36%, list=23%, signal=46%
GO_HISTONE_H3_ACETYLATION	GO_HISTONE_H3_ACETYLATION		41	0.4659429	1.5729971	0.062	0.12601525	0.996	9818	tags=56%, list=33%, signal=84%
GO_SIN3_TYPE_COMPLEX	GO_SIN3_TYPE_COMPLEX		16	0.5848282	1.57152	0.041493777	0.12669364	0.996	6354	tags=56%, list=22%, signal=72%
GO_REGULATION_OF_TRANSCRIPTION_FROM_RNA_POLYMERASE_III_PROMOTER	GO_REGULATION_OF_TRANSCRIPTION_FROM_RNA_POLYMERASE_III_PROMOTER		20	0.5065122	1.5707402	0.039014373	0.1269156	0.996	8236	tags=50%, list=28%, signal=69%
GO_V_D_J_RECOMBINATION	GO_V_D_J_RECOMBINATION		15	0.5724903	1.5702715	0.036679536	0.12685119	0.996	5684	tags=53%, list=19%, signal=66%
GO_HSP90_PROTEIN_BINDING	GO_HSP90_PROTEIN_BINDING		26	0.46366224	1.5686944	0.018255578	0.12778272	0.996	5715	tags=35%, list=19%, signal=43%
GO_POSITIVE_REGULATION_OF_CHROMATIN_MODIFICATION	GO_POSITIVE_REGULATION_OF_CHROMATIN_MODIFICATION		80	0.4193162	1.5684676	0.0390625	0.1275394	0.996	4861	tags=31%, list=17%, signal=37%
GO_REGULATION_OF_MEIOTIC_CELL_CYCLE	GO_REGULATION_OF_MEIOTIC_CELL_CYCLE		38	0.41933486	1.568189	0.029795159	0.12734878	0.996	2152	tags=21%, list=7%, signal=23%
GO_MITOCHONDRIAL_GENOME_MAINTENANCE	GO_MITOCHONDRIAL_GENOME_MAINTENANCE		21	0.47957125	1.5651377	0.023483366	0.12939192	0.996	2052	tags=19%, list=7%, signal=20%
GO_PCG_PROTEIN_COMPLEX	GO_PCG_PROTEIN_COMPLEX		43	0.49734798	1.564204	0.057259712	0.12975946	0.996	5753	tags=37%, list=20%, signal=46%
GO_PROTEIN_METHYLTRANSFERASE_ACTIVITY	GO_PROTEIN_METHYLTRANSFERASE_ACTIVITY		69	0.4078817	1.5631121	0.05179283	0.13025406	0.997	8459	tags=42%, list=29%, signal=59%
GO_ENDORIBONUCLEASE_ACTIVITY_PRODUCING_5_PHOSPHOMONOESTERS	GO_ENDORIBONUCLEASE_ACTIVITY_PRODUCING_5_PHOSPHOMONOESTERS		26	0.522789	1.5626388	0.053497944	0.1302051	0.997	4078	tags=31%, list=14%, signal=36%
GO_COVALENT_CHROMATIN_MODIFICATION	GO_COVALENT_CHROMATIN_MODIFICATION		313	0.39645913	1.5623055	0.06122449	0.13001816	0.997	6083	tags=33%, list=21%, signal=41%
GO_REGULATION_OF_TRANSCRIPTION_ELONGATION_FROM_RNA_POLYMERASE_II_PROMOTER	GO_REGULATION_OF_TRANSCRIPTION_ELONGATION_FROM_RNA_POLYMERASE_II_PROMOTER		21	0.52185136	1.5549735	0.06105263	0.13560754	0.998	4127	tags=33%, list=14%, signal=39%
GO_NUCLEOTIDE_EXCISION_REPAIR	GO_NUCLEOTIDE_EXCISION_REPAIR		111	0.40301734	1.553728	0.057971016	0.1362282	0.999	6017	tags=32%, list=20%, signal=41%
GO_NEGATIVE_REGULATION_OF_RNA_SPLICING	GO_NEGATIVE_REGULATION_OF_RNA_SPLICING		24	0.545886	1.5512737	0.055900622	0.13792852	0.999	6091	tags=58%, list=21%, signal=74%
GO_REGULATION_OF_CHROMOSOME_ORGANIZATION	GO_REGULATION_OF_CHROMOSOME_ORGANIZATION		263	0.37921882	1.5494313	0.054435484	0.1391047	0.999	4861	tags=27%, list=17%, signal=32%
GO_REGULATION_OF_MITOPHAGY	GO_REGULATION_OF_MITOPHAGY		41	0.43021694	1.5449203	0.041322313	0.14250205	1.0	5999	tags=34%, list=20%, signal=43%
GO_MIDBODY	GO_MIDBODY		122	0.39416403	1.5442107	0.0546875	0.14266819	1.0	4521	tags=30%, list=15%, signal=35%
GO_RRNA_CATABOLIC_PROCESS	GO_RRNA_CATABOLIC_PROCESS		17	0.5302299	1.5432827	0.070512824	0.14308576	1.0	9266	tags=53%, list=32%, signal=77%
GO_MICROTUBULE_NUCLEATION	GO_MICROTUBULE_NUCLEATION		18	0.58009684	1.5395169	0.058467742	0.1459274	1.0	1910	tags=33%, list=6%, signal=36%
GO_U1_SNRNP	GO_U1_SNRNP		17	0.62146205	1.5381117	0.09205021	0.14676653	1.0	8392	tags=76%, list=29%, signal=107%
GO_SMALL_NUCLEAR_RIBONUCLEOPROTEIN_COMPLEX	GO_SMALL_NUCLEAR_RIBONUCLEOPROTEIN_COMPLEX		59	0.50419503	1.5364673	0.095338985	0.14769483	1.0	5480	tags=46%, list=19%, signal=56%
GO_INTRACILIARY_TRANSPORT_PARTICLE_B	GO_INTRACILIARY_TRANSPORT_PARTICLE_B		18	0.5759777	1.533736	0.08179959	0.1498062	1.0	4832	tags=44%, list=16%, signal=53%
GO_PROTEIN_MANNOSYLATION	GO_PROTEIN_MANNOSYLATION		20	0.49179882	1.5292965	0.04592902	0.15330957	1.0	8716	tags=45%, list=30%, signal=64%
GO_RNA_POLYMERASE_II_REPRESSING_TRANSCRIPTION_FACTOR_BINDING	GO_RNA_POLYMERASE_II_REPRESSING_TRANSCRIPTION_FACTOR_BINDING		27	0.45732436	1.5287868	0.052083332	0.1533087	1.0	7050	tags=52%, list=24%, signal=68%
GO_DNA_TEMPLATED_TRANSCRIPTION_ELONGATION	GO_DNA_TEMPLATED_TRANSCRIPTION_ELONGATION		88	0.41505697	1.5275655	0.081196584	0.15392953	1.0	10359	tags=50%, list=35%, signal=77%
GO_PEPTIDE_N_ACETYLTRANSFERASE_ACTIVITY	GO_PEPTIDE_N_ACETYLTRANSFERASE_ACTIVITY		58	0.45623454	1.5264281	0.073839664	0.15441702	1.0	9818	tags=52%, list=33%, signal=77%
GO_GERM_CELL_NUCLEUS	GO_GERM_CELL_NUCLEUS		15	0.5613927	1.5236655	0.057312254	0.15647148	1.0	1729	tags=33%, list=6%, signal=35%
GO_DNA_CATABOLIC_PROCESS	GO_DNA_CATABOLIC_PROCESS		26	0.44046953	1.5170698	0.04863813	0.16222848	1.0	5261	tags=35%, list=18%, signal=42%
GO_ANATOMICAL_STRUCTURE_HOMEOSTASIS	GO_ANATOMICAL_STRUCTURE_HOMEOSTASIS		265	0.31102446	1.5150898	0.01004016	0.16365369	1.0	3813	tags=20%, list=13%, signal=22%
GO_GENE_SILENCING_BY_RNA	GO_GENE_SILENCING_BY_RNA		124	0.40431705	1.5141023	0.08349901	0.1641233	1.0	7049	tags=37%, list=24%, signal=49%
GO_CELLULAR_RESPONSE_TO_RADIATION	GO_CELLULAR_RESPONSE_TO_RADIATION		129	0.35243478	1.5132256	0.026104419	0.16447145	1.0	3055	tags=19%, list=10%, signal=22%
GO_INTRACILIARY_TRANSPORT_PARTICLE	GO_INTRACILIARY_TRANSPORT_PARTICLE		29	0.5250485	1.5126237	0.09504132	0.1645485	1.0	6339	tags=41%, list=22%, signal=53%
GO_CHROMATIN_BINDING	GO_CHROMATIN_BINDING		410	0.37201542	1.5105817	0.066019416	0.1660739	1.0	4872	tags=28%, list=17%, signal=33%
GO_REGULATION_OF_CENTROSOME_DUPLICATION	GO_REGULATION_OF_CENTROSOME_DUPLICATION		31	0.48997048	1.5096306	0.08057851	0.16652194	1.0	2425	tags=32%, list=8%, signal=35%
GO_PERICENTRIOLAR_MATERIAL	GO_PERICENTRIOLAR_MATERIAL		18	0.54561543	1.5071437	0.059615385	0.16836445	1.0	1575	tags=28%, list=5%, signal=29%
GO_POSITIVE_REGULATION_OF_DNA_TEMPLATED_TRANSCRIPTION_ELONGATION	GO_POSITIVE_REGULATION_OF_DNA_TEMPLATED_TRANSCRIPTION_ELONGATION		22	0.49150485	1.5066224	0.07597536	0.1683498	1.0	6769	tags=41%, list=23%, signal=53%
GO_EXON_EXON_JUNCTION_COMPLEX	GO_EXON_EXON_JUNCTION_COMPLEX		20	0.53644973	1.5064296	0.08067941	0.16803384	1.0	3564	tags=40%, list=12%, signal=45%
GO_ORGANELLE_ASSEMBLY	GO_ORGANELLE_ASSEMBLY		456	0.32473132	1.5050979	0.026476579	0.16878171	1.0	2048	tags=15%, list=7%, signal=16%
GO_NEGATIVE_REGULATION_OF_HISTONE_MODIFICATION	GO_NEGATIVE_REGULATION_OF_HISTONE_MODIFICATION		35	0.46169773	1.5050967	0.06198347	0.16829336	1.0	2301	tags=23%, list=8%, signal=25%
GO_MLL1_2_COMPLEX	GO_MLL1_2_COMPLEX		26	0.5057355	1.5047413	0.07910751	0.16813798	1.0	5769	tags=50%, list=20%, signal=62%
GO_ATPASE_ACTIVITY	GO_ATPASE_ACTIVITY		417	0.34012467	1.5043174	0.045816734	0.16802514	1.0	4600	tags=22%, list=16%, signal=26%
GO_CELLULAR_METABOLIC_COMPOUND_SALVAGE	GO_CELLULAR_METABOLIC_COMPOUND_SALVAGE		36	0.4262313	1.5039965	0.03984064	0.16786443	1.0	6527	tags=33%, list=22%, signal=43%
GO_POSITIVE_REGULATION_OF_CHROMOSOME_ORGANIZATION	GO_POSITIVE_REGULATION_OF_CHROMOSOME_ORGANIZATION		141	0.38809422	1.5024962	0.054545455	0.16884276	1.0	5477	tags=32%, list=19%, signal=39%
GO_TRNA_MODIFICATION	GO_TRNA_MODIFICATION		54	0.4423474	1.5008919	0.084	0.16990788	1.0	7007	tags=46%, list=24%, signal=61%
GO_HISTONE_H4_ACETYLATION	GO_HISTONE_H4_ACETYLATION		42	0.44019333	1.5006007	0.08213552	0.16972062	1.0	7095	tags=40%, list=24%, signal=53%
GO_LYSINE_N_METHYLTRANSFERASE_ACTIVITY	GO_LYSINE_N_METHYLTRANSFERASE_ACTIVITY		46	0.42483604	1.4996556	0.06175299	0.17019151	1.0	8459	tags=43%, list=29%, signal=61%
GO_POSITIVE_REGULATION_OF_DNA_RECOMBINATION	GO_POSITIVE_REGULATION_OF_DNA_RECOMBINATION		16	0.5286452	1.4991509	0.078895465	0.17018726	1.0	5937	tags=50%, list=20%, signal=63%
GO_DNA_DOUBLE_STRAND_BREAK_PROCESSING	GO_DNA_DOUBLE_STRAND_BREAK_PROCESSING		20	0.5225743	1.496436	0.083333336	0.17231259	1.0	4226	tags=35%, list=14%, signal=41%
GO_REGULATION_OF_ISOTYPE_SWITCHING	GO_REGULATION_OF_ISOTYPE_SWITCHING		22	0.4757726	1.4954666	0.053784862	0.17273208	1.0	5937	tags=41%, list=20%, signal=51%
GO_TRANSCRIPTION_ELONGATION_FROM_RNA_POLYMERASE_II_PROMOTER	GO_TRANSCRIPTION_ELONGATION_FROM_RNA_POLYMERASE_II_PROMOTER		73	0.41160417	1.4952128	0.08779443	0.17248613	1.0	6769	tags=37%, list=23%, signal=48%
GO_NEGATIVE_REGULATION_OF_CELL_CYCLE_G1_S_PHASE_TRANSITION	GO_NEGATIVE_REGULATION_OF_CELL_CYCLE_G1_S_PHASE_TRANSITION		93	0.37097964	1.4928318	0.057803467	0.1742385	1.0	6886	tags=34%, list=23%, signal=45%
GO_PROTEIN_ACYLATION	GO_PROTEIN_ACYLATION		143	0.3652105	1.4912889	0.072463766	0.17524563	1.0	5981	tags=32%, list=20%, signal=40%
GO_NUCLEOTIDYLTRANSFERASE_ACTIVITY	GO_NUCLEOTIDYLTRANSFERASE_ACTIVITY		121	0.37066668	1.4902604	0.060165975	0.17580853	1.0	6126	tags=27%, list=21%, signal=34%
GO_CHROMATIN_DNA_BINDING	GO_CHROMATIN_DNA_BINDING		75	0.4044321	1.4878635	0.06476191	0.17769137	1.0	10066	tags=53%, list=34%, signal=81%
GO_CELLULAR_RESPONSE_TO_IONIZING_RADIATION	GO_CELLULAR_RESPONSE_TO_IONIZING_RADIATION		50	0.40924823	1.4858438	0.052	0.17921399	1.0	4001	tags=28%, list=14%, signal=32%
GO_RNA_POLYMERASE_II_CARBOXY_TERMINAL_DOMAIN_KINASE_ACTIVITY	GO_RNA_POLYMERASE_II_CARBOXY_TERMINAL_DOMAIN_KINASE_ACTIVITY		16	0.54896086	1.4821969	0.081419624	0.18245299	1.0	6617	tags=50%, list=22%, signal=64%
GO_TUBULIN_BINDING	GO_TUBULIN_BINDING		255	0.3432357	1.4820381	0.043137256	0.18213621	1.0	5458	tags=28%, list=19%, signal=34%
GO_KINESIN_BINDING	GO_KINESIN_BINDING		30	0.46340805	1.4797096	0.05631068	0.18406108	1.0	4560	tags=27%, list=16%, signal=32%
GO_BAF_TYPE_COMPLEX	GO_BAF_TYPE_COMPLEX		23	0.50260293	1.4782834	0.093812376	0.18504387	1.0	8500	tags=61%, list=29%, signal=86%
GO_ESTABLISHMENT_OF_MITOTIC_SPINDLE_LOCALIZATION	GO_ESTABLISHMENT_OF_MITOTIC_SPINDLE_LOCALIZATION		23	0.5116812	1.4764459	0.08123791	0.18641792	1.0	1634	tags=35%, list=6%, signal=37%
GO_MICROTUBULE_BINDING	GO_MICROTUBULE_BINDING		188	0.35749215	1.4753755	0.057915058	0.1870052	1.0	5458	tags=29%, list=19%, signal=35%
GO_NUCLEAR_ENVELOPE_ORGANIZATION	GO_NUCLEAR_ENVELOPE_ORGANIZATION		75	0.41762197	1.4746364	0.091836736	0.18727684	1.0	2794	tags=27%, list=9%, signal=29%
GO_HISTONE_METHYLTRANSFERASE_ACTIVITY	GO_HISTONE_METHYLTRANSFERASE_ACTIVITY		49	0.43127578	1.4731349	0.104417674	0.1883328	1.0	8058	tags=43%, list=27%, signal=59%
GO_MRNA_CLEAVAGE_FACTOR_COMPLEX	GO_MRNA_CLEAVAGE_FACTOR_COMPLEX		17	0.53266317	1.4709941	0.0977131	0.19000913	1.0	5897	tags=47%, list=20%, signal=59%
GO_RNA_POLYMERASE_COMPLEX	GO_RNA_POLYMERASE_COMPLEX		117	0.37219742	1.468667	0.081419624	0.19189803	1.0	6135	tags=30%, list=21%, signal=38%
GO_POSITIVE_REGULATION_OF_CELL_DIVISION	GO_POSITIVE_REGULATION_OF_CELL_DIVISION		113	0.3640613	1.4656183	0.038	0.19458637	1.0	3509	tags=24%, list=12%, signal=27%
GO_TRANSCRIPTION_FACTOR_TFIID_COMPLEX	GO_TRANSCRIPTION_FACTOR_TFIID_COMPLEX		22	0.45215774	1.4651592	0.071570575	0.19458929	1.0	6135	tags=45%, list=21%, signal=57%
GO_NEGATIVE_REGULATION_OF_CHROMATIN_MODIFICATION	GO_NEGATIVE_REGULATION_OF_CHROMATIN_MODIFICATION		43	0.43807387	1.463706	0.094	0.19563547	1.0	2301	tags=21%, list=8%, signal=23%
GO_MICROTUBULE	GO_MICROTUBULE		380	0.33637875	1.4625834	0.05367793	0.19623557	1.0	2638	tags=18%, list=9%, signal=20%
GO_DEOXYRIBOSE_PHOSPHATE_CATABOLIC_PROCESS	GO_DEOXYRIBOSE_PHOSPHATE_CATABOLIC_PROCESS		21	0.49734783	1.4617941	0.07692308	0.1965838	1.0	9258	tags=67%, list=31%, signal=97%
GO_MALE_GAMETE_GENERATION	GO_MALE_GAMETE_GENERATION		388	0.29984942	1.4588255	0.01984127	0.19928104	1.0	6502	tags=29%, list=22%, signal=37%
GO_PHOTORECEPTOR_CONNECTING_CILIUM	GO_PHOTORECEPTOR_CONNECTING_CILIUM		30	0.43760115	1.4583681	0.07392996	0.19920394	1.0	6401	tags=33%, list=22%, signal=43%
GO_U12_TYPE_SPLICEOSOMAL_COMPLEX	GO_U12_TYPE_SPLICEOSOMAL_COMPLEX		25	0.50512904	1.4576024	0.13121273	0.19953954	1.0	9755	tags=56%, list=33%, signal=84%
GO_RESPONSE_TO_ANGIOTENSIN	GO_RESPONSE_TO_ANGIOTENSIN		15	0.49829227	1.4570342	0.06790123	0.19957939	1.0	3914	tags=27%, list=13%, signal=31%
GO_U2_SNRNP	GO_U2_SNRNP		18	0.59194773	1.4567573	0.116033755	0.19933194	1.0	8392	tags=67%, list=29%, signal=93%
GO_NUCLEAR_TRANSCRIPTIONAL_REPRESSOR_COMPLEX	GO_NUCLEAR_TRANSCRIPTIONAL_REPRESSOR_COMPLEX		22	0.48598886	1.4556365	0.1003861	0.20002079	1.0	5745	tags=36%, list=20%, signal=45%
GO_HISTONE_LYSINE_N_METHYLTRANSFERASE_ACTIVITY	GO_HISTONE_LYSINE_N_METHYLTRANSFERASE_ACTIVITY		37	0.44554833	1.4535902	0.108481266	0.20170774	1.0	8058	tags=46%, list=27%, signal=63%
GO_REGULATION_OF_NUCLEASE_ACTIVITY	GO_REGULATION_OF_NUCLEASE_ACTIVITY		23	0.4515639	1.4528053	0.07478633	0.201967	1.0	4087	tags=22%, list=14%, signal=25%
GO_RESPONSE_TO_TESTOSTERONE	GO_RESPONSE_TO_TESTOSTERONE		38	0.389192	1.4522641	0.04192872	0.20203233	1.0	4281	tags=21%, list=15%, signal=25%
GO_N_ACYLTRANSFERASE_ACTIVITY	GO_N_ACYLTRANSFERASE_ACTIVITY		94	0.37325415	1.4520408	0.09072581	0.20174246	1.0	5981	tags=30%, list=20%, signal=37%
GO_PROTEIN_DEACETYLASE_ACTIVITY	GO_PROTEIN_DEACETYLASE_ACTIVITY		43	0.39792627	1.4461273	0.078156315	0.20759511	1.0	6083	tags=37%, list=21%, signal=47%
GO_REGULATION_OF_CHROMATIN_SILENCING	GO_REGULATION_OF_CHROMATIN_SILENCING		20	0.53334415	1.4460385	0.11220472	0.20712917	1.0	6461	tags=45%, list=22%, signal=58%
GO_ENDORIBONUCLEASE_COMPLEX	GO_ENDORIBONUCLEASE_COMPLEX		17	0.52255654	1.4441324	0.10772358	0.20871343	1.0	7885	tags=41%, list=27%, signal=56%
GO_ACETYLTRANSFERASE_ACTIVITY	GO_ACETYLTRANSFERASE_ACTIVITY		91	0.36637276	1.441827	0.09486166	0.21073486	1.0	5981	tags=32%, list=20%, signal=40%
GO_POSITIVE_REGULATION_OF_CELL_CYCLE_G2_M_PHASE_TRANSITION	GO_POSITIVE_REGULATION_OF_CELL_CYCLE_G2_M_PHASE_TRANSITION		17	0.5179297	1.4416103	0.11618257	0.21040185	1.0	4518	tags=53%, list=15%, signal=63%
GO_RESPONSE_TO_RADIATION	GO_RESPONSE_TO_RADIATION		380	0.3059456	1.4408331	0.043737575	0.2106606	1.0	4570	tags=21%, list=16%, signal=25%
GO_HISTONE_H2A_ACETYLATION	GO_HISTONE_H2A_ACETYLATION		15	0.5188768	1.4401102	0.101052634	0.21089174	1.0	4309	tags=40%, list=15%, signal=47%
GO_REGULATION_OF_CELL_CYCLE_G1_S_PHASE_TRANSITION	GO_REGULATION_OF_CELL_CYCLE_G1_S_PHASE_TRANSITION		141	0.33689427	1.4400879	0.07283465	0.21038352	1.0	7221	tags=33%, list=25%, signal=43%
GO_MICROTUBULE_BUNDLE_FORMATION	GO_MICROTUBULE_BUNDLE_FORMATION		56	0.41031697	1.4387567	0.08383234	0.21130387	1.0	1751	tags=20%, list=6%, signal=21%
GO_CELLULAR_RESPONSE_TO_UV	GO_CELLULAR_RESPONSE_TO_UV		65	0.36501867	1.4379352	0.055445544	0.21170044	1.0	2301	tags=17%, list=8%, signal=18%
GO_MATURATION_OF_5_8S_RRNA	GO_MATURATION_OF_5_8S_RRNA		28	0.5293535	1.4375447	0.114583336	0.21160908	1.0	9266	tags=64%, list=32%, signal=94%
GO_CILIUM_ORGANIZATION	GO_CILIUM_ORGANIZATION		167	0.37250397	1.436375	0.09108911	0.21237037	1.0	4324	tags=22%, list=15%, signal=25%
GO_DNA_N_GLYCOSYLASE_ACTIVITY	GO_DNA_N_GLYCOSYLASE_ACTIVITY		15	0.52542734	1.4311175	0.10359408	0.21770065	1.0	9258	tags=73%, list=31%, signal=107%
GO_MATURATION_OF_5_8S_RRNA_FROM_TRICISTRONIC_RRNA_TRANSCRIPT_SSU_RRNA_5_8S_RRNA_LSU_RRNA_	GO_MATURATION_OF_5_8S_RRNA_FROM_TRICISTRONIC_RRNA_TRANSCRIPT_SSU_RRNA_5_8S_RRNA_LSU_RRNA_		19	0.55511653	1.4297479	0.12266112	0.21873032	1.0	9266	tags=68%, list=32%, signal=100%
GO_CUL4_RING_E3_UBIQUITIN_LIGASE_COMPLEX	GO_CUL4_RING_E3_UBIQUITIN_LIGASE_COMPLEX		25	0.45638168	1.4292777	0.11359026	0.21872514	1.0	6345	tags=32%, list=22%, signal=41%
GO_PROTEIN_SERINE_THREONINE_TYROSINE_KINASE_ACTIVITY	GO_PROTEIN_SERINE_THREONINE_TYROSINE_KINASE_ACTIVITY		39	0.38894197	1.4273009	0.046938777	0.22042975	1.0	3571	tags=26%, list=12%, signal=29%
GO_DEOXYRIBONUCLEOTIDE_METABOLIC_PROCESS	GO_DEOXYRIBONUCLEOTIDE_METABOLIC_PROCESS		33	0.4526479	1.4225799	0.10492505	0.22536975	1.0	9258	tags=58%, list=31%, signal=84%
GO_MACROMOLECULE_METHYLATION	GO_MACROMOLECULE_METHYLATION		181	0.33260334	1.4215553	0.07739308	0.22604854	1.0	9181	tags=41%, list=31%, signal=59%
GO_POSITIVE_REGULATION_OF_GENE_EXPRESSION_EPIGENETIC	GO_POSITIVE_REGULATION_OF_GENE_EXPRESSION_EPIGENETIC		69	0.39431688	1.4208128	0.1	0.22638457	1.0	6736	tags=30%, list=23%, signal=39%
GO_SOMATIC_RECOMBINATION_OF_IMMUNOGLOBULIN_GENE_SEGMENTS	GO_SOMATIC_RECOMBINATION_OF_IMMUNOGLOBULIN_GENE_SEGMENTS		21	0.47491062	1.4205923	0.12184874	0.2260968	1.0	5937	tags=43%, list=20%, signal=54%
GO_REGULATION_OF_MICROTUBULE_BASED_MOVEMENT	GO_REGULATION_OF_MICROTUBULE_BASED_MOVEMENT		17	0.46063685	1.41918	0.08203125	0.22716786	1.0	5458	tags=41%, list=19%, signal=51%
GO_POSITIVE_REGULATION_OF_TRANSLATIONAL_INITIATION	GO_POSITIVE_REGULATION_OF_TRANSLATIONAL_INITIATION		20	0.4585603	1.4188594	0.09053498	0.2269981	1.0	3540	tags=30%, list=12%, signal=34%
GO_ISOTYPE_SWITCHING	GO_ISOTYPE_SWITCHING		16	0.5029391	1.4188485	0.12205567	0.22645956	1.0	4127	tags=38%, list=14%, signal=44%
GO_PYRIMIDINE_DEOXYRIBONUCLEOTIDE_METABOLIC_PROCESS	GO_PYRIMIDINE_DEOXYRIBONUCLEOTIDE_METABOLIC_PROCESS		16	0.49747026	1.4181899	0.09710744	0.22664899	1.0	9258	tags=69%, list=31%, signal=100%
GO_POLE_PLASM	GO_POLE_PLASM		15	0.54088044	1.4175022	0.1002004	0.22685303	1.0	8482	tags=60%, list=29%, signal=84%
GO_CHROMATIN_SILENCING	GO_CHROMATIN_SILENCING		75	0.4182667	1.4173658	0.11776447	0.22645348	1.0	5828	tags=32%, list=20%, signal=40%
GO_MRNA_CLEAVAGE	GO_MRNA_CLEAVAGE		17	0.4929155	1.4165576	0.12371134	0.22685769	1.0	8928	tags=53%, list=30%, signal=76%
GO_PROTEIN_K63_LINKED_UBIQUITINATION	GO_PROTEIN_K63_LINKED_UBIQUITINATION		35	0.41023058	1.4158058	0.12401575	0.22718759	1.0	4127	tags=31%, list=14%, signal=37%
GO_CYCLIN_DEPENDENT_PROTEIN_KINASE_HOLOENZYME_COMPLEX	GO_CYCLIN_DEPENDENT_PROTEIN_KINASE_HOLOENZYME_COMPLEX		30	0.4082052	1.4104263	0.11157895	0.23285098	1.0	7586	tags=37%, list=26%, signal=49%
GO_RNA_HELICASE_ACTIVITY	GO_RNA_HELICASE_ACTIVITY		67	0.4109525	1.4098601	0.13438736	0.23293655	1.0	9619	tags=52%, list=33%, signal=77%
GO_NUCLEOCYTOPLASMIC_TRANSPORTER_ACTIVITY	GO_NUCLEOCYTOPLASMIC_TRANSPORTER_ACTIVITY		23	0.5376109	1.4079142	0.15240084	0.23466739	1.0	6616	tags=57%, list=22%, signal=73%
GO_H4_HISTONE_ACETYLTRANSFERASE_COMPLEX	GO_H4_HISTONE_ACETYLTRANSFERASE_COMPLEX		18	0.48526615	1.4079067	0.114107884	0.23411794	1.0	4309	tags=33%, list=15%, signal=39%
GO_DNA_DIRECTED_RNA_POLYMERASE_II_HOLOENZYME	GO_DNA_DIRECTED_RNA_POLYMERASE_II_HOLOENZYME		92	0.35618606	1.407431	0.0911017	0.23406523	1.0	6135	tags=29%, list=21%, signal=37%
GO_PYRIMIDINE_NUCLEOBASE_METABOLIC_PROCESS	GO_PYRIMIDINE_NUCLEOBASE_METABOLIC_PROCESS		19	0.47486612	1.406199	0.11456311	0.2349953	1.0	1147	tags=21%, list=4%, signal=22%
GO_SNRNA_PROCESSING	GO_SNRNA_PROCESSING		21	0.47362363	1.4049319	0.09243698	0.2359565	1.0	5217	tags=33%, list=18%, signal=40%
GO_PEPTIDYL_LYSINE_METHYLATION	GO_PEPTIDYL_LYSINE_METHYLATION		64	0.3867652	1.4041938	0.112	0.23620299	1.0	9181	tags=45%, list=31%, signal=66%
GO_NUCLEAR_PORE	GO_NUCLEAR_PORE		74	0.4120132	1.4024913	0.1255144	0.2376905	1.0	6641	tags=41%, list=23%, signal=52%
GO_REGULATION_OF_DNA_BINDING	GO_REGULATION_OF_DNA_BINDING		92	0.33835775	1.4022763	0.072265625	0.2373599	1.0	4533	tags=22%, list=15%, signal=26%
GO_N_ACETYLTRANSFERASE_ACTIVITY	GO_N_ACETYLTRANSFERASE_ACTIVITY		77	0.37787825	1.4016612	0.11405295	0.23755428	1.0	5981	tags=31%, list=20%, signal=39%
GO_ATPASE_ACTIVITY_COUPLED	GO_ATPASE_ACTIVITY_COUPLED		308	0.3196489	1.4012727	0.087128714	0.23745778	1.0	4600	tags=21%, list=16%, signal=25%
GO_POLY_PYRIMIDINE_TRACT_BINDING	GO_POLY_PYRIMIDINE_TRACT_BINDING		17	0.5217589	1.3992788	0.12863071	0.23925556	1.0	3540	tags=29%, list=12%, signal=33%
GO_DNA_PACKAGING_COMPLEX	GO_DNA_PACKAGING_COMPLEX		81	0.46404895	1.3983816	0.1670061	0.23979634	1.0	5132	tags=32%, list=17%, signal=39%
GO_CENTROSOME_LOCALIZATION	GO_CENTROSOME_LOCALIZATION		17	0.511519	1.3971914	0.12692308	0.24064234	1.0	1249	tags=29%, list=4%, signal=31%
GO_NUCLEAR_EXOSOME_RNASE_COMPLEX_	GO_NUCLEAR_EXOSOME_RNASE_COMPLEX_		15	0.53357023	1.3960168	0.1400862	0.24152446	1.0	5217	tags=40%, list=18%, signal=49%
GO_NEGATIVE_REGULATION_OF_RESPONSE_TO_DNA_DAMAGE_STIMULUS	GO_NEGATIVE_REGULATION_OF_RESPONSE_TO_DNA_DAMAGE_STIMULUS		49	0.36831203	1.3943592	0.079166666	0.24300794	1.0	6200	tags=35%, list=21%, signal=44%
GO_4_IRON_4_SULFUR_CLUSTER_BINDING	GO_4_IRON_4_SULFUR_CLUSTER_BINDING		40	0.42261013	1.3942264	0.11904762	0.24261153	1.0	1466	tags=23%, list=5%, signal=24%
GO_INTRINSIC_APOPTOTIC_SIGNALING_PATHWAY_BY_P53_CLASS_MEDIATOR	GO_INTRINSIC_APOPTOTIC_SIGNALING_PATHWAY_BY_P53_CLASS_MEDIATOR		52	0.35414085	1.3936632	0.07630522	0.24270456	1.0	762	tags=10%, list=3%, signal=10%
GO_LAMIN_BINDING	GO_LAMIN_BINDING		17	0.4646058	1.3895347	0.106090374	0.24697459	1.0	5624	tags=47%, list=19%, signal=58%
GO_NEGATIVE_REGULATION_OF_DNA_REPLICATION	GO_NEGATIVE_REGULATION_OF_DNA_REPLICATION		54	0.38035306	1.3875939	0.12048193	0.24878323	1.0	7248	tags=37%, list=25%, signal=49%
GO_AGGRESOME	GO_AGGRESOME		31	0.3983222	1.3843497	0.10735586	0.25219038	1.0	3998	tags=23%, list=14%, signal=26%
GO_CELL_DIVISION_SITE	GO_CELL_DIVISION_SITE		47	0.3983814	1.3842436	0.113502935	0.2517188	1.0	3744	tags=28%, list=13%, signal=32%
GO_SMALL_NUCLEOLAR_RIBONUCLEOPROTEIN_COMPLEX	GO_SMALL_NUCLEOLAR_RIBONUCLEOPROTEIN_COMPLEX		18	0.57393724	1.3833692	0.1740042	0.25216663	1.0	9624	tags=61%, list=33%, signal=91%
GO_GAMMA_TUBULIN_BINDING	GO_GAMMA_TUBULIN_BINDING		23	0.42222106	1.3815998	0.10408163	0.25379455	1.0	1004	tags=22%, list=3%, signal=22%
GO_GERM_CELL_DEVELOPMENT	GO_GERM_CELL_DEVELOPMENT		177	0.3004181	1.3812425	0.053784862	0.25366318	1.0	6315	tags=28%, list=21%, signal=36%
GO_GAMETE_GENERATION	GO_GAMETE_GENERATION		484	0.27912462	1.3810256	0.0390625	0.25334483	1.0	6502	tags=27%, list=22%, signal=34%
GO_ESTABLISHMENT_OF_SPINDLE_ORIENTATION	GO_ESTABLISHMENT_OF_SPINDLE_ORIENTATION		25	0.456832	1.3776248	0.1325536	0.25689435	1.0	1909	tags=28%, list=6%, signal=30%
GO_MICROTUBULE_BASED_MOVEMENT	GO_MICROTUBULE_BASED_MOVEMENT		191	0.33105448	1.373874	0.11960784	0.26096144	1.0	1751	tags=15%, list=6%, signal=15%
GO_RESPONSE_TO_VITAMIN_A	GO_RESPONSE_TO_VITAMIN_A		19	0.4506039	1.3690188	0.11608961	0.266471	1.0	5828	tags=32%, list=20%, signal=39%
GO_METHYLATION	GO_METHYLATION		252	0.300066	1.3681982	0.104950495	0.26695874	1.0	8162	tags=35%, list=28%, signal=47%
GO_POSITIVE_REGULATION_OF_CYCLIN_DEPENDENT_PROTEIN_KINASE_ACTIVITY	GO_POSITIVE_REGULATION_OF_CYCLIN_DEPENDENT_PROTEIN_KINASE_ACTIVITY		33	0.40754452	1.3658854	0.11623246	0.26928645	1.0	3481	tags=24%, list=12%, signal=27%
GO_PRECATALYTIC_SPLICEOSOME	GO_PRECATALYTIC_SPLICEOSOME		21	0.5459727	1.3638434	0.18162839	0.27131492	1.0	8392	tags=48%, list=29%, signal=67%
GO_P53_BINDING	GO_P53_BINDING		66	0.37739867	1.3637693	0.098790325	0.27080688	1.0	9950	tags=48%, list=34%, signal=73%
GO_REGULATION_OF_CHROMATIN_ORGANIZATION	GO_REGULATION_OF_CHROMATIN_ORGANIZATION		144	0.3352683	1.3603002	0.09861933	0.274598	1.0	4861	tags=25%, list=17%, signal=30%
GO_LEFT_RIGHT_PATTERN_FORMATION	GO_LEFT_RIGHT_PATTERN_FORMATION		21	0.44008684	1.3575729	0.11685824	0.27750894	1.0	5514	tags=33%, list=19%, signal=41%
GO_S_ADENOSYLMETHIONINE_DEPENDENT_METHYLTRANSFERASE_ACTIVITY	GO_S_ADENOSYLMETHIONINE_DEPENDENT_METHYLTRANSFERASE_ACTIVITY		121	0.32655868	1.3574599	0.11290322	0.2770284	1.0	8162	tags=36%, list=28%, signal=50%
GO_RNA_SECONDARY_STRUCTURE_UNWINDING	GO_RNA_SECONDARY_STRUCTURE_UNWINDING		40	0.41900197	1.3551149	0.13717695	0.279475	1.0	9619	tags=52%, list=33%, signal=78%
GO_SNRNA_METABOLIC_PROCESS	GO_SNRNA_METABOLIC_PROCESS		75	0.36542833	1.3548769	0.13865547	0.2791886	1.0	6169	tags=29%, list=21%, signal=37%
GO_PEPTIDYL_LYSINE_TRIMETHYLATION	GO_PEPTIDYL_LYSINE_TRIMETHYLATION		19	0.46016544	1.3523904	0.15127702	0.28185728	1.0	9174	tags=53%, list=31%, signal=76%
GO_POSITIVE_REGULATION_OF_DNA_REPLICATION	GO_POSITIVE_REGULATION_OF_DNA_REPLICATION		84	0.35920027	1.3510795	0.13111547	0.28292447	1.0	1411	tags=15%, list=5%, signal=16%
GO_PYRIMIDINE_NUCLEOSIDE_TRIPHOSPHATE_METABOLIC_PROCESS	GO_PYRIMIDINE_NUCLEOSIDE_TRIPHOSPHATE_METABOLIC_PROCESS		20	0.46876583	1.3475177	0.175	0.28709403	1.0	2565	tags=30%, list=9%, signal=33%
GO_REGULATION_OF_PROTEIN_TARGETING_TO_MITOCHONDRION	GO_REGULATION_OF_PROTEIN_TARGETING_TO_MITOCHONDRION		90	0.31611037	1.3452414	0.088	0.28950086	1.0	4613	tags=23%, list=16%, signal=28%
GO_TRANSFERASE_ACTIVITY_TRANSFERRING_ACYL_GROUPS_OTHER_THAN_AMINO_ACYL_GROUPS	GO_TRANSFERASE_ACTIVITY_TRANSFERRING_ACYL_GROUPS_OTHER_THAN_AMINO_ACYL_GROUPS		196	0.30369374	1.3447021	0.093495935	0.2895565	1.0	6058	tags=27%, list=21%, signal=34%
GO_ENDORIBONUCLEASE_ACTIVITY	GO_ENDORIBONUCLEASE_ACTIVITY		46	0.37267324	1.3437951	0.11752577	0.29017746	1.0	4078	tags=24%, list=14%, signal=28%
GO_CELLULAR_RESPONSE_TO_LIGHT_STIMULUS	GO_CELLULAR_RESPONSE_TO_LIGHT_STIMULUS		85	0.31931955	1.3434876	0.09922179	0.2899754	1.0	3055	tags=16%, list=10%, signal=18%
GO_TRANSFERASE_ACTIVITY_TRANSFERRING_ONE_CARBON_GROUPS	GO_TRANSFERASE_ACTIVITY_TRANSFERRING_ONE_CARBON_GROUPS		195	0.30806547	1.3399011	0.11111111	0.29398948	1.0	8162	tags=35%, list=28%, signal=48%
GO_TRANSCRIPTION_FROM_RNA_POLYMERASE_III_PROMOTER	GO_TRANSCRIPTION_FROM_RNA_POLYMERASE_III_PROMOTER		38	0.40346453	1.3395141	0.15368852	0.29385146	1.0	11179	tags=53%, list=38%, signal=85%
GO_REGULATION_OF_LIGASE_ACTIVITY	GO_REGULATION_OF_LIGASE_ACTIVITY		125	0.36921057	1.3368409	0.16244726	0.29673415	1.0	2732	tags=17%, list=9%, signal=18%
GO_SPERM_MOTILITY	GO_SPERM_MOTILITY		37	0.37851042	1.3264526	0.09330629	0.31020665	1.0	4050	tags=27%, list=14%, signal=31%
GO_PRERIBOSOME_LARGE_SUBUNIT_PRECURSOR	GO_PRERIBOSOME_LARGE_SUBUNIT_PRECURSOR		21	0.5654901	1.32435	0.21443298	0.31248817	1.0	9233	tags=62%, list=31%, signal=90%
GO_TRANSFERASE_COMPLEX_TRANSFERRING_PHOSPHORUS_CONTAINING_GROUPS	GO_TRANSFERASE_COMPLEX_TRANSFERRING_PHOSPHORUS_CONTAINING_GROUPS		229	0.29723004	1.3222414	0.108510636	0.31484663	1.0	6764	tags=27%, list=23%, signal=34%
GO_POSITIVE_REGULATION_OF_MICROTUBULE_POLYMERIZATION	GO_POSITIVE_REGULATION_OF_MICROTUBULE_POLYMERIZATION		17	0.43018976	1.321975	0.13453816	0.314549	1.0	2112	tags=18%, list=7%, signal=19%
GO_POSITIVE_REGULATION_OF_DNA_BIOSYNTHETIC_PROCESS	GO_POSITIVE_REGULATION_OF_DNA_BIOSYNTHETIC_PROCESS		58	0.38461182	1.3205999	0.17391305	0.31587526	1.0	2922	tags=22%, list=10%, signal=25%
GO_PRE_MRNA_BINDING	GO_PRE_MRNA_BINDING		24	0.44626224	1.3190247	0.18436874	0.3174242	1.0	9755	tags=58%, list=33%, signal=87%
GO_MRNA_BINDING	GO_MRNA_BINDING		144	0.33663273	1.3190055	0.15889831	0.31677532	1.0	6289	tags=31%, list=21%, signal=40%
GO_RIBONUCLEASE_ACTIVITY	GO_RIBONUCLEASE_ACTIVITY		86	0.3273214	1.3137368	0.14754099	0.32373774	1.0	4078	tags=21%, list=14%, signal=24%
GO_NONMOTILE_PRIMARY_CILIUM_ASSEMBLY	GO_NONMOTILE_PRIMARY_CILIUM_ASSEMBLY		22	0.44758546	1.3113347	0.16907217	0.32651848	1.0	7933	tags=50%, list=27%, signal=68%
GO_RNA_PHOSPHODIESTER_BOND_HYDROLYSIS	GO_RNA_PHOSPHODIESTER_BOND_HYDROLYSIS		107	0.33665437	1.308204	0.15498939	0.33038118	1.0	4078	tags=22%, list=14%, signal=26%
GO_TRNA_METHYLATION	GO_TRNA_METHYLATION		20	0.42840058	1.3077288	0.16046967	0.33036667	1.0	8919	tags=50%, list=30%, signal=72%
GO_NUCLEOTIDE_EXCISION_REPAIR_PREINCISION_COMPLEX_ASSEMBLY	GO_NUCLEOTIDE_EXCISION_REPAIR_PREINCISION_COMPLEX_ASSEMBLY		29	0.41800234	1.3070655	0.18976545	0.33062938	1.0	4479	tags=24%, list=15%, signal=28%
GO_EUCHROMATIN	GO_EUCHROMATIN		30	0.40101987	1.3014672	0.1919192	0.33808503	1.0	7961	tags=50%, list=27%, signal=68%
GO_BINDING_OF_SPERM_TO_ZONA_PELLUCIDA	GO_BINDING_OF_SPERM_TO_ZONA_PELLUCIDA		24	0.40486082	1.2983595	0.1724846	0.34200022	1.0	11547	tags=58%, list=39%, signal=96%
GO_CYTOPLASMIC_MICROTUBULE	GO_CYTOPLASMIC_MICROTUBULE		52	0.3532192	1.2977122	0.15120968	0.34221318	1.0	5207	tags=27%, list=18%, signal=33%
GO_CELLULAR_PROCESS_INVOLVED_IN_REPRODUCTION_IN_MULTICELLULAR_ORGANISM	GO_CELLULAR_PROCESS_INVOLVED_IN_REPRODUCTION_IN_MULTICELLULAR_ORGANISM		211	0.28313074	1.2970659	0.07707911	0.34245345	1.0	5834	tags=26%, list=20%, signal=32%
GO_CILIARY_TIP	GO_CILIARY_TIP		42	0.40199816	1.2970437	0.18442623	0.341764	1.0	6339	tags=31%, list=22%, signal=39%
GO_RAN_GTPASE_BINDING	GO_RAN_GTPASE_BINDING		31	0.43217054	1.2960155	0.1980198	0.34258223	1.0	5448	tags=29%, list=19%, signal=36%
GO_RESPONSE_TO_X_RAY	GO_RESPONSE_TO_X_RAY		30	0.41601038	1.2959225	0.18487395	0.342014	1.0	7184	tags=43%, list=24%, signal=57%
GO_HYDROLASE_ACTIVITY_HYDROLYZING_N_GLYCOSYL_COMPOUNDS	GO_HYDROLASE_ACTIVITY_HYDROLYZING_N_GLYCOSYL_COMPOUNDS		22	0.39613447	1.295367	0.16701461	0.34217688	1.0	9258	tags=64%, list=31%, signal=93%
GO_POSITIVE_REGULATION_OF_CELL_CYCLE_G1_S_PHASE_TRANSITION	GO_POSITIVE_REGULATION_OF_CELL_CYCLE_G1_S_PHASE_TRANSITION		28	0.38279435	1.2951545	0.17731959	0.34181908	1.0	354	tags=14%, list=1%, signal=14%
GO_REGULATION_OF_TELOMERASE_RNA_LOCALIZATION_TO_CAJAL_BODY	GO_REGULATION_OF_TELOMERASE_RNA_LOCALIZATION_TO_CAJAL_BODY		15	0.5662936	1.2940551	0.24847251	0.34268802	1.0	10634	tags=67%, list=36%, signal=104%
GO_RNA_MODIFICATION	GO_RNA_MODIFICATION		111	0.3527855	1.2914896	0.19480519	0.34579194	1.0	7947	tags=39%, list=27%, signal=53%
GO_TRANSCRIPTION_FROM_RNA_POLYMERASE_I_PROMOTER	GO_TRANSCRIPTION_FROM_RNA_POLYMERASE_I_PROMOTER		35	0.3893954	1.2899817	0.19271949	0.3473162	1.0	6624	tags=31%, list=23%, signal=41%
GO_REPRESSING_TRANSCRIPTION_FACTOR_BINDING	GO_REPRESSING_TRANSCRIPTION_FACTOR_BINDING		55	0.3467338	1.2894777	0.16255145	0.3473324	1.0	7441	tags=38%, list=25%, signal=51%
GO_CELLULAR_SENESCENCE	GO_CELLULAR_SENESCENCE		31	0.3544838	1.2894199	0.1403162	0.34671336	1.0	3373	tags=23%, list=11%, signal=25%
GO_NUCLEAR_INNER_MEMBRANE	GO_NUCLEAR_INNER_MEMBRANE		49	0.34827563	1.2886918	0.1552795	0.3470374	1.0	6122	tags=24%, list=21%, signal=31%
GO_PROTEIN_HETEROTETRAMERIZATION	GO_PROTEIN_HETEROTETRAMERIZATION		30	0.4439419	1.2871985	0.23459245	0.3485742	1.0	7708	tags=40%, list=26%, signal=54%
GO_ANAPHASE_PROMOTING_COMPLEX_DEPENDENT_CATABOLIC_PROCESS	GO_ANAPHASE_PROMOTING_COMPLEX_DEPENDENT_CATABOLIC_PROCESS		75	0.44244903	1.2862271	0.22863248	0.34932658	1.0	5414	tags=31%, list=18%, signal=37%
GO_CHROMATIN_DISASSEMBLY	GO_CHROMATIN_DISASSEMBLY		16	0.48554096	1.2848318	0.21157685	0.35070708	1.0	8500	tags=56%, list=29%, signal=79%
GO_PURINE_CONTAINING_COMPOUND_SALVAGE	GO_PURINE_CONTAINING_COMPOUND_SALVAGE		16	0.41930008	1.2845668	0.16597511	0.35040048	1.0	6527	tags=38%, list=22%, signal=48%
GO_PYRIMIDINE_NUCLEOSIDE_TRIPHOSPHATE_BIOSYNTHETIC_PROCESS	GO_PYRIMIDINE_NUCLEOSIDE_TRIPHOSPHATE_BIOSYNTHETIC_PROCESS		18	0.4675835	1.2837745	0.21643287	0.3508883	1.0	4162	tags=33%, list=14%, signal=39%
GO_REGULATION_OF_ESTABLISHMENT_OF_PROTEIN_LOCALIZATION_TO_MITOCHONDRION	GO_REGULATION_OF_ESTABLISHMENT_OF_PROTEIN_LOCALIZATION_TO_MITOCHONDRION		120	0.2882407	1.2827139	0.12328767	0.35172448	1.0	7184	tags=29%, list=24%, signal=38%
GO_NEGATIVE_REGULATION_OF_CELL_CYCLE_ARREST	GO_NEGATIVE_REGULATION_OF_CELL_CYCLE_ARREST		17	0.41583636	1.2826475	0.17490494	0.35111207	1.0	10462	tags=65%, list=36%, signal=100%
GO_RNA_CAPPING	GO_RNA_CAPPING		34	0.41503745	1.2817909	0.21294363	0.35172302	1.0	9597	tags=44%, list=33%, signal=65%
GO_RNA_POLYMERASE_II_TRANSCRIPTION_FACTOR_COMPLEX	GO_RNA_POLYMERASE_II_TRANSCRIPTION_FACTOR_COMPLEX		95	0.3203696	1.276898	0.1764706	0.3583865	1.0	8739	tags=36%, list=30%, signal=51%
GO_DEACETYLASE_ACTIVITY	GO_DEACETYLASE_ACTIVITY		54	0.33479428	1.276429	0.15353535	0.3583567	1.0	6083	tags=31%, list=21%, signal=40%
GO_CILIUM_MORPHOGENESIS	GO_CILIUM_MORPHOGENESIS		183	0.33175182	1.2754	0.21	0.35913032	1.0	4324	tags=20%, list=15%, signal=23%
GO_NCRNA_TRANSCRIPTION	GO_NCRNA_TRANSCRIPTION		81	0.33788353	1.2722831	0.19578947	0.36309025	1.0	6169	tags=30%, list=21%, signal=37%
GO_HISTONE_METHYLATION	GO_HISTONE_METHYLATION		73	0.3514805	1.2713767	0.21703854	0.36377728	1.0	9181	tags=42%, list=31%, signal=62%
GO_NLS_BEARING_PROTEIN_IMPORT_INTO_NUCLEUS	GO_NLS_BEARING_PROTEIN_IMPORT_INTO_NUCLEUS		22	0.44178838	1.2679138	0.21544716	0.36831716	1.0	7296	tags=41%, list=25%, signal=54%
GO_CELLULAR_RESPONSE_TO_INTERLEUKIN_4	GO_CELLULAR_RESPONSE_TO_INTERLEUKIN_4		24	0.39546728	1.2674704	0.18108653	0.36825043	1.0	3882	tags=21%, list=13%, signal=24%
GO_TELOMERIC_DNA_BINDING	GO_TELOMERIC_DNA_BINDING		29	0.39586774	1.2666295	0.22633745	0.36882752	1.0	3834	tags=31%, list=13%, signal=36%
GO_POSITIVE_REGULATION_OF_TELOMERE_CAPPING	GO_POSITIVE_REGULATION_OF_TELOMERE_CAPPING		15	0.4625509	1.2639933	0.19960475	0.37222075	1.0	2683	tags=27%, list=9%, signal=29%
GO_NUCLEAR_TRANSCRIBED_MRNA_CATABOLIC_PROCESS_DEADENYLATION_DEPENDENT_DECAY	GO_NUCLEAR_TRANSCRIBED_MRNA_CATABOLIC_PROCESS_DEADENYLATION_DEPENDENT_DECAY		54	0.34400257	1.2636011	0.18181819	0.37210655	1.0	5825	tags=28%, list=20%, signal=35%
GO_POSITIVE_REGULATION_OF_IMMUNOGLOBULIN_PRODUCTION	GO_POSITIVE_REGULATION_OF_IMMUNOGLOBULIN_PRODUCTION		28	0.38553366	1.2613431	0.20781893	0.37476677	1.0	5937	tags=36%, list=20%, signal=45%
GO_NUCLEOBASE_METABOLIC_PROCESS	GO_NUCLEOBASE_METABOLIC_PROCESS		38	0.38087267	1.2603217	0.19433199	0.37566462	1.0	6558	tags=34%, list=22%, signal=44%
GO_REGULATION_OF_SPINDLE_ORGANIZATION	GO_REGULATION_OF_SPINDLE_ORGANIZATION		19	0.43129322	1.2580838	0.21472393	0.3784656	1.0	2355	tags=26%, list=8%, signal=29%
GO_CELLULAR_RESPONSE_TO_DSRNA	GO_CELLULAR_RESPONSE_TO_DSRNA		33	0.37233585	1.2580717	0.15031315	0.37774226	1.0	4439	tags=27%, list=15%, signal=32%
GO_AXONAL_FASCICULATION	GO_AXONAL_FASCICULATION		20	0.44785133	1.2553304	0.16888046	0.3812688	1.0	0	tags=5%, list=0%, signal=5%
GO_DNA_BINDING_BENDING	GO_DNA_BINDING_BENDING		19	0.42822537	1.2544639	0.19153225	0.38188884	1.0	4087	tags=21%, list=14%, signal=24%
GO_FEMALE_GAMETE_GENERATION	GO_FEMALE_GAMETE_GENERATION		83	0.29505396	1.2525003	0.12795275	0.38411412	1.0	1249	tags=12%, list=4%, signal=13%
GO_CELL_CYCLE_ARREST	GO_CELL_CYCLE_ARREST		140	0.28309992	1.2502811	0.16367266	0.38680586	1.0	3771	tags=19%, list=13%, signal=21%
GO_PROTEIN_MONOUBIQUITINATION	GO_PROTEIN_MONOUBIQUITINATION		50	0.38362902	1.2494973	0.23109244	0.38729063	1.0	3783	tags=24%, list=13%, signal=27%
GO_PROTEIN_ALKYLATION	GO_PROTEIN_ALKYLATION		101	0.31279838	1.2473027	0.19628099	0.390071	1.0	9181	tags=40%, list=31%, signal=57%
GO_NUCLEUS_ORGANIZATION	GO_NUCLEUS_ORGANIZATION		124	0.3205138	1.2461715	0.2041237	0.3910904	1.0	2794	tags=20%, list=9%, signal=22%
GO_REGULATION_OF_PROTEASOMAL_UBIQUITIN_DEPENDENT_PROTEIN_CATABOLIC_PROCESS	GO_REGULATION_OF_PROTEASOMAL_UBIQUITIN_DEPENDENT_PROTEIN_CATABOLIC_PROCESS		143	0.29732677	1.2456791	0.18997912	0.39111462	1.0	2701	tags=15%, list=9%, signal=17%
GO_POSITIVE_REGULATION_OF_TELOMERE_MAINTENANCE_VIA_TELOMERE_LENGTHENING	GO_POSITIVE_REGULATION_OF_TELOMERE_MAINTENANCE_VIA_TELOMERE_LENGTHENING		33	0.40742868	1.2451862	0.24654832	0.39112762	1.0	9260	tags=48%, list=31%, signal=71%
GO_DORSAL_VENTRAL_AXIS_SPECIFICATION	GO_DORSAL_VENTRAL_AXIS_SPECIFICATION		20	0.40972885	1.2439853	0.19809523	0.39233544	1.0	5576	tags=30%, list=19%, signal=37%
GO_REGULATION_OF_GENE_SILENCING	GO_REGULATION_OF_GENE_SILENCING		47	0.36714602	1.2430232	0.20898438	0.39313406	1.0	10680	tags=51%, list=36%, signal=80%
GO_SYNAPTONEMAL_COMPLEX_ORGANIZATION	GO_SYNAPTONEMAL_COMPLEX_ORGANIZATION		17	0.4095011	1.2429876	0.21052632	0.39244848	1.0	4514	tags=29%, list=15%, signal=35%
GO_AU_RICH_ELEMENT_BINDING	GO_AU_RICH_ELEMENT_BINDING		21	0.3919106	1.2429682	0.20746888	0.3917296	1.0	5217	tags=33%, list=18%, signal=40%
GO_CLEAVAGE_INVOLVED_IN_RRNA_PROCESSING	GO_CLEAVAGE_INVOLVED_IN_RRNA_PROCESSING		19	0.46734843	1.239725	0.25051335	0.39609382	1.0	5217	tags=37%, list=18%, signal=45%
GO_TRANSFERASE_ACTIVITY_TRANSFERRING_ACYL_GROUPS	GO_TRANSFERASE_ACTIVITY_TRANSFERRING_ACYL_GROUPS		230	0.2686711	1.2396551	0.15120968	0.39545378	1.0	6174	tags=27%, list=21%, signal=33%
GO_NEGATIVE_REGULATION_OF_DNA_METABOLIC_PROCESS	GO_NEGATIVE_REGULATION_OF_DNA_METABOLIC_PROCESS		107	0.30689722	1.2393014	0.2195122	0.39525834	1.0	3444	tags=19%, list=12%, signal=21%
GO_REGULATION_OF_GENE_EXPRESSION_BY_GENETIC_IMPRINTING	GO_REGULATION_OF_GENE_EXPRESSION_BY_GENETIC_IMPRINTING		16	0.44070294	1.2391732	0.21146245	0.39473012	1.0	5828	tags=25%, list=20%, signal=31%
GO_POSITIVE_REGULATION_OF_TELOMERE_MAINTENANCE	GO_POSITIVE_REGULATION_OF_TELOMERE_MAINTENANCE		46	0.3800847	1.2391585	0.23170732	0.3940027	1.0	9357	tags=48%, list=32%, signal=70%
GO_HISTONE_H3_K4_METHYLATION	GO_HISTONE_H3_K4_METHYLATION		27	0.39113787	1.2385025	0.22884615	0.39431065	1.0	9174	tags=44%, list=31%, signal=65%
GO_TOR_SIGNALING	GO_TOR_SIGNALING		16	0.4382355	1.2382692	0.2310757	0.39392155	1.0	4636	tags=31%, list=16%, signal=37%
GO_NEUROPEPTIDE_HORMONE_ACTIVITY	GO_NEUROPEPTIDE_HORMONE_ACTIVITY		25	0.42011395	1.2370198	0.18554688	0.39514342	1.0	10156	tags=60%, list=35%, signal=92%
GO_CELLULAR_RESPONSE_TO_NITRIC_OXIDE	GO_CELLULAR_RESPONSE_TO_NITRIC_OXIDE		15	0.42771986	1.2325646	0.21218075	0.4011631	1.0	3820	tags=33%, list=13%, signal=38%
GO_N_METHYLTRANSFERASE_ACTIVITY	GO_N_METHYLTRANSFERASE_ACTIVITY		75	0.31760666	1.2304232	0.20731707	0.40382016	1.0	8752	tags=39%, list=30%, signal=55%
GO_DEOXYRIBONUCLEOSIDE_TRIPHOSPHATE_METABOLIC_PROCESS	GO_DEOXYRIBONUCLEOSIDE_TRIPHOSPHATE_METABOLIC_PROCESS		16	0.44754392	1.2298535	0.23856859	0.40396497	1.0	6323	tags=38%, list=21%, signal=48%
GO_DNA_METHYLATION_INVOLVED_IN_GAMETE_GENERATION	GO_DNA_METHYLATION_INVOLVED_IN_GAMETE_GENERATION		18	0.42315438	1.2249012	0.2019802	0.4112375	1.0	12053	tags=61%, list=41%, signal=103%
GO_RNA_STABILIZATION	GO_RNA_STABILIZATION		28	0.39430442	1.2240503	0.218107	0.4118632	1.0	8783	tags=43%, list=30%, signal=61%
GO_PIRNA_METABOLIC_PROCESS	GO_PIRNA_METABOLIC_PROCESS		15	0.44690835	1.2232425	0.22504893	0.41243955	1.0	12053	tags=67%, list=41%, signal=113%
GO_REGULATION_OF_TELOMERASE_ACTIVITY	GO_REGULATION_OF_TELOMERASE_ACTIVITY		42	0.35593656	1.2226484	0.23203285	0.41262624	1.0	2765	tags=21%, list=9%, signal=24%
GO_TELOMERE_CAPPING	GO_TELOMERE_CAPPING		24	0.40851107	1.2170057	0.24089068	0.4211942	1.0	5684	tags=33%, list=19%, signal=41%
GO_RESPONSE_TO_CAFFEINE	GO_RESPONSE_TO_CAFFEINE		18	0.39683798	1.2166234	0.20781893	0.42103437	1.0	521	tags=17%, list=2%, signal=17%
GO_TRNA_PROCESSING	GO_TRNA_PROCESSING		107	0.3493107	1.2149692	0.2763713	0.42302644	1.0	7007	tags=34%, list=24%, signal=44%
GO_NUCLEOLAR_PART	GO_NUCLEOLAR_PART		59	0.40784514	1.2113967	0.28719008	0.42833665	1.0	9473	tags=41%, list=32%, signal=60%
GO_RETROGRADE_VESICLE_MEDIATED_TRANSPORT_GOLGI_TO_ER	GO_RETROGRADE_VESICLE_MEDIATED_TRANSPORT_GOLGI_TO_ER		74	0.34163877	1.2103165	0.23108384	0.42938435	1.0	634	tags=12%, list=2%, signal=12%
GO_MAP_KINASE_KINASE_KINASE_ACTIVITY	GO_MAP_KINASE_KINASE_KINASE_ACTIVITY		19	0.41073164	1.2101139	0.27125505	0.42892918	1.0	6666	tags=42%, list=23%, signal=54%
GO_RRNA_TRANSCRIPTION	GO_RRNA_TRANSCRIPTION		17	0.41781893	1.2088141	0.24279836	0.4302684	1.0	6888	tags=47%, list=23%, signal=61%
GO_POSITIVE_REGULATION_OF_PROTEIN_MODIFICATION_BY_SMALL_PROTEIN_CONJUGATION_OR_REMOVAL	GO_POSITIVE_REGULATION_OF_PROTEIN_MODIFICATION_BY_SMALL_PROTEIN_CONJUGATION_OR_REMOVAL		186	0.2987244	1.2074121	0.23240939	0.43184516	1.0	5414	tags=23%, list=18%, signal=27%
GO_AXONEMAL_DYNEIN_COMPLEX_ASSEMBLY	GO_AXONEMAL_DYNEIN_COMPLEX_ASSEMBLY		17	0.42249364	1.2063369	0.24901186	0.43272728	1.0	4050	tags=24%, list=14%, signal=27%
GO_NEGATIVE_REGULATION_OF_INTRINSIC_APOPTOTIC_SIGNALING_PATHWAY_BY_P53_CLASS_MEDIATOR	GO_NEGATIVE_REGULATION_OF_INTRINSIC_APOPTOTIC_SIGNALING_PATHWAY_BY_P53_CLASS_MEDIATOR		18	0.38956738	1.204114	0.23255815	0.43568727	1.0	6200	tags=28%, list=21%, signal=35%
GO_NEGATIVE_REGULATION_OF_DNA_BINDING	GO_NEGATIVE_REGULATION_OF_DNA_BINDING		45	0.3283696	1.2039232	0.20309478	0.4352215	1.0	3301	tags=20%, list=11%, signal=22%
GO_NEGATIVE_REGULATION_OF_CELLULAR_CATABOLIC_PROCESS	GO_NEGATIVE_REGULATION_OF_CELLULAR_CATABOLIC_PROCESS		149	0.27056342	1.2038999	0.19284295	0.43446606	1.0	2701	tags=14%, list=9%, signal=15%
GO_CYCLIN_BINDING	GO_CYCLIN_BINDING		19	0.39743832	1.203806	0.22285715	0.43383446	1.0	6617	tags=37%, list=22%, signal=48%
GO_RESPONSE_TO_UV_B	GO_RESPONSE_TO_UV_B		16	0.4033979	1.2018763	0.2265625	0.43628928	1.0	4479	tags=31%, list=15%, signal=37%
GO_RESPONSE_TO_GAMMA_RADIATION	GO_RESPONSE_TO_GAMMA_RADIATION		48	0.3314425	1.2018538	0.22626263	0.435537	1.0	2717	tags=19%, list=9%, signal=21%
GO_CULLIN_RING_UBIQUITIN_LIGASE_COMPLEX	GO_CULLIN_RING_UBIQUITIN_LIGASE_COMPLEX		142	0.27693617	1.2015753	0.192	0.4351848	1.0	5595	tags=22%, list=19%, signal=27%
GO_NUCLEAR_TRANSCRIPTION_FACTOR_COMPLEX	GO_NUCLEAR_TRANSCRIPTION_FACTOR_COMPLEX		120	0.2964675	1.1997557	0.25690022	0.4374035	1.0	8743	tags=36%, list=30%, signal=51%
GO_PROTEIN_TRANSPORT_ALONG_MICROTUBULE	GO_PROTEIN_TRANSPORT_ALONG_MICROTUBULE		26	0.40366983	1.1992735	0.2601626	0.43739384	1.0	9773	tags=46%, list=33%, signal=69%
GO_METHYL_CPG_BINDING	GO_METHYL_CPG_BINDING		15	0.43655315	1.1992189	0.26271185	0.43670636	1.0	6757	tags=47%, list=23%, signal=61%
GO_REGULATION_OF_CELLULAR_SENESCENCE	GO_REGULATION_OF_CELLULAR_SENESCENCE		26	0.3738835	1.1986396	0.24395162	0.43686295	1.0	6399	tags=27%, list=22%, signal=34%
GO_PROTEIN_POLYMERIZATION	GO_PROTEIN_POLYMERIZATION		64	0.30024615	1.1986383	0.20758483	0.43608773	1.0	2109	tags=16%, list=7%, signal=17%
GO_IMMUNOGLOBULIN_PRODUCTION_INVOLVED_IN_IMMUNOGLOBULIN_MEDIATED_IMMUNE_RESPONSE	GO_IMMUNOGLOBULIN_PRODUCTION_INVOLVED_IN_IMMUNOGLOBULIN_MEDIATED_IMMUNE_RESPONSE		22	0.41599047	1.1973065	0.2683438	0.43749732	1.0	4127	tags=27%, list=14%, signal=32%
GO_CHROMATIN_SILENCING_AT_RDNA	GO_CHROMATIN_SILENCING_AT_RDNA		30	0.42788172	1.1968884	0.29856852	0.43735772	1.0	5132	tags=27%, list=17%, signal=32%
GO_PYRIMIDINE_NUCLEOTIDE_BIOSYNTHETIC_PROCESS	GO_PYRIMIDINE_NUCLEOTIDE_BIOSYNTHETIC_PROCESS		29	0.36932972	1.1954299	0.25987527	0.43904445	1.0	2565	tags=21%, list=9%, signal=23%
GO_TBP_CLASS_PROTEIN_BINDING	GO_TBP_CLASS_PROTEIN_BINDING		19	0.40711206	1.1941223	0.26539278	0.44044998	1.0	8309	tags=42%, list=28%, signal=59%
GO_PROTEIN_LOCALIZATION_TO_CILIUM	GO_PROTEIN_LOCALIZATION_TO_CILIUM		25	0.3929871	1.1917073	0.26078027	0.44362316	1.0	11139	tags=56%, list=38%, signal=90%
GO_PEPTIDYL_GLUTAMIC_ACID_MODIFICATION	GO_PEPTIDYL_GLUTAMIC_ACID_MODIFICATION		27	0.35446715	1.1915118	0.23416507	0.44315228	1.0	5410	tags=30%, list=18%, signal=36%
GO_REGULATION_OF_CELLULAR_RESPONSE_TO_HEAT	GO_REGULATION_OF_CELLULAR_RESPONSE_TO_HEAT		73	0.34450614	1.1903707	0.26774848	0.4442505	1.0	6616	tags=32%, list=22%, signal=41%
GO_RNA_METHYLATION	GO_RNA_METHYLATION		50	0.34121427	1.1882614	0.2827443	0.44703242	1.0	8919	tags=42%, list=30%, signal=60%
GO_NEGATIVE_REGULATION_OF_TELOMERE_MAINTENANCE_VIA_TELOMERE_LENGTHENING	GO_NEGATIVE_REGULATION_OF_TELOMERE_MAINTENANCE_VIA_TELOMERE_LENGTHENING		17	0.43146688	1.1866266	0.2848233	0.44890246	1.0	2689	tags=18%, list=9%, signal=19%
GO_GLYCERALDEHYDE_3_PHOSPHATE_METABOLIC_PROCESS	GO_GLYCERALDEHYDE_3_PHOSPHATE_METABOLIC_PROCESS		16	0.4485516	1.1863453	0.304	0.44859108	1.0	12252	tags=75%, list=42%, signal=128%
GO_EXOSOME_RNASE_COMPLEX_	GO_EXOSOME_RNASE_COMPLEX_		21	0.4094722	1.1858784	0.2735043	0.44858995	1.0	7583	tags=38%, list=26%, signal=51%
GO_HISTONE_MONOUBIQUITINATION	GO_HISTONE_MONOUBIQUITINATION		23	0.41622254	1.184283	0.29192546	0.45049506	1.0	3260	tags=26%, list=11%, signal=29%
GO_NUCLEAR_TRANSCRIBED_MRNA_CATABOLIC_PROCESS_EXONUCLEOLYTIC	GO_NUCLEAR_TRANSCRIBED_MRNA_CATABOLIC_PROCESS_EXONUCLEOLYTIC		30	0.38067046	1.1842024	0.29350105	0.44983724	1.0	5217	tags=27%, list=18%, signal=32%
GO_POSITIVE_REGULATION_OF_G1_S_TRANSITION_OF_MITOTIC_CELL_CYCLE	GO_POSITIVE_REGULATION_OF_G1_S_TRANSITION_OF_MITOTIC_CELL_CYCLE		24	0.35961926	1.1796647	0.26890758	0.45665854	1.0	3589	tags=21%, list=12%, signal=24%
GO_HISTONE_MRNA_METABOLIC_PROCESS	GO_HISTONE_MRNA_METABOLIC_PROCESS		28	0.37753564	1.1793745	0.29299363	0.4563295	1.0	8958	tags=36%, list=30%, signal=51%
GO_OVARIAN_FOLLICLE_DEVELOPMENT	GO_OVARIAN_FOLLICLE_DEVELOPMENT		53	0.2962384	1.1789244	0.19628099	0.45633125	1.0	5625	tags=25%, list=19%, signal=30%
GO_RNA_PHOSPHODIESTER_BOND_HYDROLYSIS_EXONUCLEOLYTIC	GO_RNA_PHOSPHODIESTER_BOND_HYDROLYSIS_EXONUCLEOLYTIC		33	0.34503344	1.1789211	0.25732216	0.45554972	1.0	2730	tags=18%, list=9%, signal=20%
GO_SPERMATID_NUCLEUS_DIFFERENTIATION	GO_SPERMATID_NUCLEUS_DIFFERENTIATION		15	0.41267455	1.178549	0.26824456	0.45538887	1.0	2693	tags=20%, list=9%, signal=22%
GO_SWI_SNF_COMPLEX	GO_SWI_SNF_COMPLEX		15	0.4402053	1.1765895	0.31992337	0.4579922	1.0	8500	tags=53%, list=29%, signal=75%
GO_MACROMOLECULE_DEACYLATION	GO_MACROMOLECULE_DEACYLATION		67	0.29948473	1.17514	0.25099602	0.45974353	1.0	6083	tags=30%, list=21%, signal=38%
GO_NEGATIVE_REGULATION_OF_ORGANELLE_ASSEMBLY	GO_NEGATIVE_REGULATION_OF_ORGANELLE_ASSEMBLY		21	0.3611771	1.1749327	0.26284584	0.4592844	1.0	4423	tags=29%, list=15%, signal=34%
GO_REGULATION_OF_MAMMARY_GLAND_EPITHELIAL_CELL_PROLIFERATION	GO_REGULATION_OF_MAMMARY_GLAND_EPITHELIAL_CELL_PROLIFERATION		16	0.40227085	1.1748025	0.2753346	0.458683	1.0	7704	tags=38%, list=26%, signal=51%
GO_CHD_TYPE_COMPLEX	GO_CHD_TYPE_COMPLEX		17	0.42221722	1.1745275	0.29051384	0.4583528	1.0	5733	tags=29%, list=19%, signal=37%
GO_SCF_DEPENDENT_PROTEASOMAL_UBIQUITIN_DEPENDENT_PROTEIN_CATABOLIC_PROCESS	GO_SCF_DEPENDENT_PROTEASOMAL_UBIQUITIN_DEPENDENT_PROTEIN_CATABOLIC_PROCESS		23	0.34411612	1.1744701	0.24603175	0.45766702	1.0	2063	tags=17%, list=7%, signal=19%
GO_NCRNA_3_END_PROCESSING	GO_NCRNA_3_END_PROCESSING		20	0.44234905	1.1734424	0.3130252	0.45861214	1.0	6927	tags=45%, list=24%, signal=59%
GO_PROTEIN_EXPORT_FROM_NUCLEUS	GO_PROTEIN_EXPORT_FROM_NUCLEUS		29	0.3607861	1.1717999	0.25506073	0.46058518	1.0	3134	tags=24%, list=11%, signal=27%
GO_CHLORIDE_CHANNEL_COMPLEX	GO_CHLORIDE_CHANNEL_COMPLEX		44	0.33182308	1.170848	0.24513619	0.46139938	1.0	1279	tags=14%, list=4%, signal=14%
GO_POSITIVE_REGULATION_OF_DNA_BINDING	GO_POSITIVE_REGULATION_OF_DNA_BINDING		42	0.32203928	1.1707696	0.24351297	0.46076682	1.0	4533	tags=21%, list=15%, signal=25%
GO_SPLICEOSOMAL_SNRNP_ASSEMBLY	GO_SPLICEOSOMAL_SNRNP_ASSEMBLY		37	0.4205715	1.1695087	0.31556502	0.46217385	1.0	9846	tags=54%, list=33%, signal=81%
GO_MULTICELLULAR_ORGANISM_AGING	GO_MULTICELLULAR_ORGANISM_AGING		29	0.33271003	1.1680707	0.25454545	0.46378988	1.0	1528	tags=14%, list=5%, signal=15%
GO_GENETIC_IMPRINTING	GO_GENETIC_IMPRINTING		20	0.38128808	1.1677576	0.27162978	0.46355578	1.0	5828	tags=20%, list=20%, signal=25%
GO_SPERM_EGG_RECOGNITION	GO_SPERM_EGG_RECOGNITION		32	0.33242285	1.1653649	0.25826445	0.46683183	1.0	13008	tags=63%, list=44%, signal=112%
GO_PRERIBOSOME	GO_PRERIBOSOME		60	0.41082287	1.1650057	0.33195877	0.46663	1.0	9678	tags=45%, list=33%, signal=67%
GO_NUCLEAR_IMPORT	GO_NUCLEAR_IMPORT		126	0.2939877	1.1645358	0.26095617	0.4666425	1.0	8501	tags=36%, list=29%, signal=50%
GO_UBIQUITIN_LIGASE_COMPLEX	GO_UBIQUITIN_LIGASE_COMPLEX		250	0.2684461	1.1638281	0.2388664	0.46706232	1.0	5601	tags=22%, list=19%, signal=27%
GO_HISTONE_DEACETYLASE_BINDING	GO_HISTONE_DEACETYLASE_BINDING		102	0.28374705	1.1633168	0.25933203	0.46714106	1.0	5421	tags=25%, list=18%, signal=30%
GO_POSITIVE_REGULATION_OF_INTERFERON_BETA_PRODUCTION	GO_POSITIVE_REGULATION_OF_INTERFERON_BETA_PRODUCTION		30	0.35589993	1.1630621	0.27380952	0.46673566	1.0	4087	tags=23%, list=14%, signal=27%
GO_REGULATION_OF_CELL_MATURATION	GO_REGULATION_OF_CELL_MATURATION		18	0.3866681	1.1624357	0.26070037	0.4669899	1.0	1582	tags=22%, list=5%, signal=23%
GO_REGULATION_OF_PROTEIN_MODIFICATION_BY_SMALL_PROTEIN_CONJUGATION_OR_REMOVAL	GO_REGULATION_OF_PROTEIN_MODIFICATION_BY_SMALL_PROTEIN_CONJUGATION_OR_REMOVAL		266	0.2688019	1.1619762	0.25053078	0.46697167	1.0	3947	tags=16%, list=13%, signal=19%
GO_NUCLEOBASE_BIOSYNTHETIC_PROCESS	GO_NUCLEOBASE_BIOSYNTHETIC_PROCESS		18	0.41627398	1.1615016	0.30588236	0.4669378	1.0	6558	tags=44%, list=22%, signal=57%
GO_ANTIGEN_PROCESSING_AND_PRESENTATION_OF_PEPTIDE_OR_POLYSACCHARIDE_ANTIGEN_VIA_MHC_CLASS_II	GO_ANTIGEN_PROCESSING_AND_PRESENTATION_OF_PEPTIDE_OR_POLYSACCHARIDE_ANTIGEN_VIA_MHC_CLASS_II		86	0.32529598	1.1608871	0.30753565	0.46723494	1.0	634	tags=9%, list=2%, signal=9%
GO_PROTEIN_K11_LINKED_UBIQUITINATION	GO_PROTEIN_K11_LINKED_UBIQUITINATION		27	0.36758065	1.1602049	0.27676767	0.46761444	1.0	5414	tags=37%, list=18%, signal=45%
GO_RNA_PHOSPHODIESTER_BOND_HYDROLYSIS_ENDONUCLEOLYTIC	GO_RNA_PHOSPHODIESTER_BOND_HYDROLYSIS_ENDONUCLEOLYTIC		55	0.32819378	1.1593974	0.29375	0.46820667	1.0	2515	tags=18%, list=9%, signal=20%
GO_NEGATIVE_REGULATION_OF_PROTEIN_CATABOLIC_PROCESS	GO_NEGATIVE_REGULATION_OF_PROTEIN_CATABOLIC_PROCESS		103	0.27751583	1.1582763	0.23868313	0.46928468	1.0	2701	tags=14%, list=9%, signal=15%
GO_TRNA_METHYLTRANSFERASE_ACTIVITY	GO_TRNA_METHYLTRANSFERASE_ACTIVITY		18	0.38563153	1.1577808	0.28458497	0.46935374	1.0	8919	tags=50%, list=30%, signal=72%
GO_N_TERMINAL_PROTEIN_AMINO_ACID_MODIFICATION	GO_N_TERMINAL_PROTEIN_AMINO_ACID_MODIFICATION		24	0.3722669	1.1568009	0.30309278	0.47025025	1.0	5758	tags=33%, list=20%, signal=41%
GO_POSITIVE_REGULATION_OF_RNA_SPLICING	GO_POSITIVE_REGULATION_OF_RNA_SPLICING		22	0.38917673	1.1566905	0.2945892	0.46965376	1.0	6079	tags=41%, list=21%, signal=52%
GO_PML_BODY	GO_PML_BODY		93	0.291704	1.154839	0.28629032	0.472013	1.0	4923	tags=19%, list=17%, signal=23%
GO_NEGATIVE_REGULATION_OF_RETINOIC_ACID_RECEPTOR_SIGNALING_PATHWAY	GO_NEGATIVE_REGULATION_OF_RETINOIC_ACID_RECEPTOR_SIGNALING_PATHWAY		19	0.41399014	1.1531608	0.26796117	0.4741107	1.0	7083	tags=32%, list=24%, signal=42%
GO_CELL_AGING	GO_CELL_AGING		65	0.2732243	1.1517038	0.26145038	0.47578135	1.0	3373	tags=17%, list=11%, signal=19%
GO_PROTEIN_UBIQUITINATION_INVOLVED_IN_UBIQUITIN_DEPENDENT_PROTEIN_CATABOLIC_PROCESS	GO_PROTEIN_UBIQUITINATION_INVOLVED_IN_UBIQUITIN_DEPENDENT_PROTEIN_CATABOLIC_PROCESS		129	0.28898287	1.1514709	0.29012346	0.47541294	1.0	6734	tags=26%, list=23%, signal=34%
GO_HISTONE_UBIQUITINATION	GO_HISTONE_UBIQUITINATION		34	0.37784106	1.1508839	0.31120333	0.47560963	1.0	4342	tags=26%, list=15%, signal=31%
GO_NUCLEAR_TRANSPORT	GO_NUCLEAR_TRANSPORT		343	0.26495874	1.1506248	0.2780083	0.47527924	1.0	4048	tags=20%, list=14%, signal=22%
GO_REGULATION_OF_CYTOSKELETON_ORGANIZATION	GO_REGULATION_OF_CYTOSKELETON_ORGANIZATION		478	0.26589075	1.1500841	0.25148514	0.47543535	1.0	2539	tags=15%, list=9%, signal=16%
GO_HEAT_SHOCK_PROTEIN_BINDING	GO_HEAT_SHOCK_PROTEIN_BINDING		87	0.28935614	1.148182	0.25403225	0.47796977	1.0	5715	tags=24%, list=19%, signal=30%
GO_NEGATIVE_REGULATION_OF_TELOMERASE_ACTIVITY	GO_NEGATIVE_REGULATION_OF_TELOMERASE_ACTIVITY		15	0.3858412	1.1477112	0.2866242	0.4780231	1.0	2717	tags=27%, list=9%, signal=29%
GO_GLUTAMATE_RECEPTOR_SIGNALING_PATHWAY	GO_GLUTAMATE_RECEPTOR_SIGNALING_PATHWAY		41	0.3299907	1.1472543	0.2651515	0.47808757	1.0	5405	tags=24%, list=18%, signal=30%
GO_NUCLEAR_EUCHROMATIN	GO_NUCLEAR_EUCHROMATIN		23	0.36668003	1.1462716	0.31746033	0.47897848	1.0	12565	tags=74%, list=43%, signal=129%
GO_CELLULAR_RESPONSE_TO_REACTIVE_NITROGEN_SPECIES	GO_CELLULAR_RESPONSE_TO_REACTIVE_NITROGEN_SPECIES		19	0.37923175	1.1454232	0.28927204	0.47965574	1.0	3820	tags=26%, list=13%, signal=30%
GO_ESTABLISHMENT_OF_MITOTIC_SPINDLE_ORIENTATION	GO_ESTABLISHMENT_OF_MITOTIC_SPINDLE_ORIENTATION		19	0.4008178	1.1451321	0.31528047	0.47939095	1.0	1575	tags=26%, list=5%, signal=28%
GO_POSITIVE_REGULATION_OF_TELOMERASE_ACTIVITY	GO_POSITIVE_REGULATION_OF_TELOMERASE_ACTIVITY		28	0.3646303	1.1432165	0.29141715	0.4819424	1.0	2765	tags=21%, list=9%, signal=24%
GO_PYRIMIDINE_NUCLEOSIDE_BIOSYNTHETIC_PROCESS	GO_PYRIMIDINE_NUCLEOSIDE_BIOSYNTHETIC_PROCESS		29	0.34826428	1.1410882	0.30737704	0.48490345	1.0	2565	tags=21%, list=9%, signal=23%
GO_RNA_METHYLTRANSFERASE_ACTIVITY	GO_RNA_METHYLTRANSFERASE_ACTIVITY		42	0.32693416	1.1364763	0.29856852	0.49196702	1.0	8919	tags=43%, list=30%, signal=61%
GO_POSITIVE_REGULATION_OF_PROTEIN_ACETYLATION	GO_POSITIVE_REGULATION_OF_PROTEIN_ACETYLATION		35	0.31305546	1.135078	0.2753346	0.49361402	1.0	11821	tags=60%, list=40%, signal=100%
GO_REGULATION_OF_DNA_BIOSYNTHETIC_PROCESS	GO_REGULATION_OF_DNA_BIOSYNTHETIC_PROCESS		92	0.29531056	1.1315957	0.29435483	0.4989282	1.0	2922	tags=17%, list=10%, signal=19%
GO_CORE_PROMOTER_PROXIMAL_REGION_DNA_BINDING	GO_CORE_PROMOTER_PROXIMAL_REGION_DNA_BINDING		341	0.26695484	1.1311574	0.2935606	0.49890262	1.0	9339	tags=35%, list=32%, signal=51%
GO_COP9_SIGNALOSOME	GO_COP9_SIGNALOSOME		33	0.33523637	1.1307232	0.30802602	0.49890274	1.0	5053	tags=27%, list=17%, signal=33%
GO_FOREBRAIN_REGIONALIZATION	GO_FOREBRAIN_REGIONALIZATION		23	0.40021223	1.1305848	0.2851485	0.4983539	1.0	11303	tags=70%, list=38%, signal=113%
GO_INNER_EAR_RECEPTOR_STEREOCILIUM_ORGANIZATION	GO_INNER_EAR_RECEPTOR_STEREOCILIUM_ORGANIZATION		20	0.3566228	1.1293733	0.3011811	0.4997424	1.0	3182	tags=20%, list=11%, signal=22%
GO_AXIS_SPECIFICATION	GO_AXIS_SPECIFICATION		86	0.29331332	1.1287827	0.29549903	0.5000028	1.0	7496	tags=31%, list=25%, signal=42%
GO_S_ACYLTRANSFERASE_ACTIVITY	GO_S_ACYLTRANSFERASE_ACTIVITY		29	0.32879934	1.128532	0.30103093	0.49964407	1.0	4091	tags=28%, list=14%, signal=32%
GO_PYRIMIDINE_CONTAINING_COMPOUND_BIOSYNTHETIC_PROCESS	GO_PYRIMIDINE_CONTAINING_COMPOUND_BIOSYNTHETIC_PROCESS		39	0.32230282	1.1283121	0.28865978	0.49926075	1.0	2565	tags=18%, list=9%, signal=20%
GO_POSITIVE_REGULATION_OF_MRNA_PROCESSING	GO_POSITIVE_REGULATION_OF_MRNA_PROCESSING		30	0.34969568	1.1278527	0.30905512	0.49928007	1.0	10719	tags=57%, list=36%, signal=89%
GO_REGULATION_OF_CYSTEINE_TYPE_ENDOPEPTIDASE_ACTIVITY_INVOLVED_IN_APOPTOTIC_SIGNALING_PATHWAY	GO_REGULATION_OF_CYSTEINE_TYPE_ENDOPEPTIDASE_ACTIVITY_INVOLVED_IN_APOPTOTIC_SIGNALING_PATHWAY		22	0.36258972	1.1267487	0.31557378	0.50046235	1.0	9437	tags=41%, list=32%, signal=60%
GO_PROTEIN_SERINE_THREONINE_KINASE_INHIBITOR_ACTIVITY	GO_PROTEIN_SERINE_THREONINE_KINASE_INHIBITOR_ACTIVITY		30	0.33757645	1.1267462	0.30425963	0.4996779	1.0	7365	tags=30%, list=25%, signal=40%
GO_NEGATIVE_REGULATION_OF_PROTEIN_MODIFICATION_BY_SMALL_PROTEIN_CONJUGATION_OR_REMOVAL	GO_NEGATIVE_REGULATION_OF_PROTEIN_MODIFICATION_BY_SMALL_PROTEIN_CONJUGATION_OR_REMOVAL		132	0.30196702	1.1266422	0.30125523	0.4990771	1.0	8502	tags=30%, list=29%, signal=42%
GO_NEUTRAL_LIPID_BIOSYNTHETIC_PROCESS	GO_NEUTRAL_LIPID_BIOSYNTHETIC_PROCESS		27	0.34769946	1.1242931	0.29514563	0.5024074	1.0	5290	tags=26%, list=18%, signal=32%
GO_REGULATION_OF_IMMUNOGLOBULIN_PRODUCTION	GO_REGULATION_OF_IMMUNOGLOBULIN_PRODUCTION		44	0.30635098	1.1241475	0.2962963	0.5018305	1.0	5937	tags=32%, list=20%, signal=40%
GO_HISTONE_H3_DEACETYLATION	GO_HISTONE_H3_DEACETYLATION		22	0.34380788	1.1214423	0.30942622	0.5056381	1.0	5750	tags=36%, list=20%, signal=45%
GO_PROTEIN_MODIFICATION_BY_SMALL_PROTEIN_REMOVAL	GO_PROTEIN_MODIFICATION_BY_SMALL_PROTEIN_REMOVAL		108	0.28732422	1.119492	0.31707317	0.5083298	1.0	4722	tags=20%, list=16%, signal=24%
GO_REGULATION_OF_PROTEASOMAL_PROTEIN_CATABOLIC_PROCESS	GO_REGULATION_OF_PROTEASOMAL_PROTEIN_CATABOLIC_PROCESS		176	0.25900236	1.1185079	0.30866808	0.50931996	1.0	2382	tags=13%, list=8%, signal=14%
GO_RESPONSE_TO_ELECTRICAL_STIMULUS	GO_RESPONSE_TO_ELECTRICAL_STIMULUS		41	0.31664371	1.1174097	0.28265107	0.51062256	1.0	5072	tags=27%, list=17%, signal=32%
GO_HYALURONAN_METABOLIC_PROCESS	GO_HYALURONAN_METABOLIC_PROCESS		29	0.3290981	1.1161487	0.3135246	0.51205087	1.0	1643	tags=14%, list=6%, signal=15%
GO_REGULATION_OF_RETINOIC_ACID_RECEPTOR_SIGNALING_PATHWAY	GO_REGULATION_OF_RETINOIC_ACID_RECEPTOR_SIGNALING_PATHWAY		25	0.3561379	1.1155759	0.31496063	0.51226187	1.0	7083	tags=28%, list=24%, signal=37%
GO_POSITIVE_REGULATION_OF_MITOCHONDRIAL_OUTER_MEMBRANE_PERMEABILIZATION_INVOLVED_IN_APOPTOTIC_SIGNALING_PATHWAY	GO_POSITIVE_REGULATION_OF_MITOCHONDRIAL_OUTER_MEMBRANE_PERMEABILIZATION_INVOLVED_IN_APOPTOTIC_SIGNALING_PATHWAY		36	0.31511027	1.1140872	0.29672447	0.5141121	1.0	7184	tags=31%, list=24%, signal=40%
GO_U5_SNRNP	GO_U5_SNRNP		16	0.46520078	1.1134993	0.40301725	0.51434314	1.0	9846	tags=63%, list=33%, signal=94%
GO_CYTOPLASMIC_EXOSOME_RNASE_COMPLEX_	GO_CYTOPLASMIC_EXOSOME_RNASE_COMPLEX_		15	0.41437948	1.1133338	0.35670102	0.51383823	1.0	7583	tags=40%, list=26%, signal=54%
GO_TRNA_METABOLIC_PROCESS	GO_TRNA_METABOLIC_PROCESS		167	0.31226754	1.110821	0.37214136	0.51745963	1.0	7084	tags=32%, list=24%, signal=42%
GO_NITROGEN_COMPOUND_TRANSPORT	GO_NITROGEN_COMPOUND_TRANSPORT		476	0.23120312	1.1099648	0.2605932	0.5181711	1.0	6883	tags=26%, list=23%, signal=33%
GO_MANNOSYLATION	GO_MANNOSYLATION		32	0.3251661	1.1092058	0.3244898	0.5187584	1.0	8716	tags=38%, list=30%, signal=53%
GO_REGULATION_OF_TRANSCRIPTION_INITIATION_FROM_RNA_POLYMERASE_II_PROMOTER	GO_REGULATION_OF_TRANSCRIPTION_INITIATION_FROM_RNA_POLYMERASE_II_PROMOTER		23	0.34677732	1.1074911	0.31163707	0.5209929	1.0	8309	tags=39%, list=28%, signal=54%
GO_NUCLEOTIDE_EXCISION_REPAIR_DNA_DUPLEX_UNWINDING	GO_NUCLEOTIDE_EXCISION_REPAIR_DNA_DUPLEX_UNWINDING		22	0.36872992	1.1073942	0.36165577	0.5203688	1.0	4479	tags=23%, list=15%, signal=27%
GO_HSP70_PROTEIN_BINDING	GO_HSP70_PROTEIN_BINDING		29	0.31911603	1.1060162	0.32352942	0.52195734	1.0	5715	tags=28%, list=19%, signal=34%
GO_REGULATION_OF_PROTEIN_UBIQUITINATION_INVOLVED_IN_UBIQUITIN_DEPENDENT_PROTEIN_CATABOLIC_PROCESS	GO_REGULATION_OF_PROTEIN_UBIQUITINATION_INVOLVED_IN_UBIQUITIN_DEPENDENT_PROTEIN_CATABOLIC_PROCESS		100	0.3286837	1.1058685	0.35897437	0.52139544	1.0	5414	tags=24%, list=18%, signal=29%
GO_INCLUSION_BODY	GO_INCLUSION_BODY		66	0.27845615	1.1047157	0.29831934	0.52274275	1.0	2745	tags=14%, list=9%, signal=15%
GO_CELLULAR_RESPONSE_TO_GAMMA_RADIATION	GO_CELLULAR_RESPONSE_TO_GAMMA_RADIATION		19	0.36363643	1.1040798	0.32617188	0.5230887	1.0	2258	tags=21%, list=8%, signal=23%
GO_REGULATION_OF_CELL_AGING	GO_REGULATION_OF_CELL_AGING		32	0.324227	1.1029044	0.3306773	0.5243542	1.0	6399	tags=25%, list=22%, signal=32%
GO_NEGATIVE_REGULATION_OF_CYCLIN_DEPENDENT_PROTEIN_KINASE_ACTIVITY	GO_NEGATIVE_REGULATION_OF_CYCLIN_DEPENDENT_PROTEIN_KINASE_ACTIVITY		32	0.30894864	1.1027901	0.32226562	0.52375805	1.0	2890	tags=22%, list=10%, signal=24%
GO_CENTRIOLAR_SATELLITE	GO_CENTRIOLAR_SATELLITE		24	0.35509115	1.1011666	0.3493976	0.52580297	1.0	106	tags=13%, list=0%, signal=13%
GO_DYNEIN_COMPLEX	GO_DYNEIN_COMPLEX		42	0.3031871	1.1007814	0.31092438	0.52569306	1.0	934	tags=10%, list=3%, signal=10%
GO_CILIARY_PART	GO_CILIARY_PART		262	0.25356355	1.1004453	0.30844793	0.5254468	1.0	4423	tags=18%, list=15%, signal=20%
GO_REGULATION_OF_TELOMERE_MAINTENANCE_VIA_TELOMERE_LENGTHENING	GO_REGULATION_OF_TELOMERE_MAINTENANCE_VIA_TELOMERE_LENGTHENING		50	0.33714804	1.1000465	0.35496956	0.52533185	1.0	2765	tags=18%, list=9%, signal=20%
GO_IMMUNOGLOBULIN_PRODUCTION	GO_IMMUNOGLOBULIN_PRODUCTION		44	0.323465	1.0999227	0.33935744	0.5247317	1.0	5937	tags=30%, list=20%, signal=37%
GO_RIBONUCLEOPROTEIN_COMPLEX_SUBUNIT_ORGANIZATION	GO_RIBONUCLEOPROTEIN_COMPLEX_SUBUNIT_ORGANIZATION		186	0.30347377	1.0993283	0.35596707	0.52497226	1.0	9246	tags=38%, list=31%, signal=55%
GO_EPITHELIAL_CELL_APOPTOTIC_PROCESS	GO_EPITHELIAL_CELL_APOPTOTIC_PROCESS		25	0.32381633	1.0993042	0.32323232	0.52422833	1.0	1990	tags=16%, list=7%, signal=17%
GO_CYTOPLASMIC_SEQUESTERING_OF_TRANSCRIPTION_FACTOR	GO_CYTOPLASMIC_SEQUESTERING_OF_TRANSCRIPTION_FACTOR		19	0.36503935	1.0989382	0.33877552	0.52411795	1.0	2115	tags=16%, list=7%, signal=17%
GO_CELL_PROJECTION_ASSEMBLY	GO_CELL_PROJECTION_ASSEMBLY		242	0.26865813	1.0989227	0.32748538	0.5233544	1.0	2048	tags=12%, list=7%, signal=12%
GO_SPERMATID_DIFFERENTIATION	GO_SPERMATID_DIFFERENTIATION		104	0.25464848	1.0986278	0.31212723	0.523102	1.0	4127	tags=20%, list=14%, signal=23%
GO_INTRINSIC_APOPTOTIC_SIGNALING_PATHWAY_IN_RESPONSE_TO_DNA_DAMAGE_BY_P53_CLASS_MEDIATOR	GO_INTRINSIC_APOPTOTIC_SIGNALING_PATHWAY_IN_RESPONSE_TO_DNA_DAMAGE_BY_P53_CLASS_MEDIATOR		29	0.32477462	1.0985904	0.33333334	0.52238315	1.0	762	tags=10%, list=3%, signal=11%
GO_RNA_POLYMERASE_ACTIVITY	GO_RNA_POLYMERASE_ACTIVITY		42	0.34762284	1.09644	0.37916666	0.5254022	1.0	6034	tags=26%, list=21%, signal=33%
GO_CILIARY_BASE	GO_CILIARY_BASE		21	0.36028782	1.0939773	0.34509805	0.528923	1.0	4832	tags=24%, list=16%, signal=28%
GO_REGULATION_OF_CELLULAR_PROTEIN_CATABOLIC_PROCESS	GO_REGULATION_OF_CELLULAR_PROTEIN_CATABOLIC_PROCESS		264	0.25348592	1.0911381	0.32780084	0.53316116	1.0	4377	tags=17%, list=15%, signal=19%
GO_NCRNA_PROCESSING	GO_NCRNA_PROCESSING		368	0.32791167	1.0899218	0.3783784	0.53456897	1.0	7947	tags=31%, list=27%, signal=42%
GO_RESPONSE_TO_COCAINE	GO_RESPONSE_TO_COCAINE		43	0.29695907	1.0889586	0.32136106	0.5355068	1.0	5828	tags=28%, list=20%, signal=35%
GO_REGULATION_OF_TELOMERE_CAPPING	GO_REGULATION_OF_TELOMERE_CAPPING		21	0.3740306	1.0887557	0.38030887	0.53506655	1.0	2683	tags=19%, list=9%, signal=21%
GO_HISTONE_DEACETYLASE_COMPLEX	GO_HISTONE_DEACETYLASE_COMPLEX		60	0.29332316	1.0886885	0.3266533	0.53439593	1.0	8719	tags=40%, list=30%, signal=57%
GO_NUCLEOBASE_CONTAINING_COMPOUND_TRANSMEMBRANE_TRANSPORTER_ACTIVITY	GO_NUCLEOBASE_CONTAINING_COMPOUND_TRANSMEMBRANE_TRANSPORTER_ACTIVITY		31	0.30930498	1.0874091	0.3233645	0.5359511	1.0	7454	tags=32%, list=25%, signal=43%
GO_RIBONUCLEOPROTEIN_COMPLEX_BIOGENESIS	GO_RIBONUCLEOPROTEIN_COMPLEX_BIOGENESIS		422	0.3238476	1.0849367	0.3908524	0.53948563	1.0	9682	tags=37%, list=33%, signal=55%
GO_SMN_SM_PROTEIN_COMPLEX	GO_SMN_SM_PROTEIN_COMPLEX		17	0.44898614	1.08432	0.39419088	0.53980976	1.0	12332	tags=71%, list=42%, signal=121%
GO_NUCLEOSIDE_BISPHOSPHATE_BIOSYNTHETIC_PROCESS	GO_NUCLEOSIDE_BISPHOSPHATE_BIOSYNTHETIC_PROCESS		17	0.37551194	1.0833318	0.37125748	0.54085433	1.0	4451	tags=29%, list=15%, signal=35%
GO_BETA_CATENIN_TCF_COMPLEX_ASSEMBLY	GO_BETA_CATENIN_TCF_COMPLEX_ASSEMBLY		38	0.3283383	1.0833068	0.34122288	0.5401113	1.0	10184	tags=45%, list=35%, signal=68%
GO_POSITIVE_REGULATION_OF_LIGASE_ACTIVITY	GO_POSITIVE_REGULATION_OF_LIGASE_ACTIVITY		105	0.31705007	1.0830151	0.37473685	0.53981656	1.0	5414	tags=22%, list=18%, signal=27%
GO_PROTEIN_AUTOUBIQUITINATION	GO_PROTEIN_AUTOUBIQUITINATION		48	0.3072026	1.0828208	0.36	0.53936964	1.0	1540	tags=15%, list=5%, signal=15%
GO_REGULATION_OF_NON_CANONICAL_WNT_SIGNALING_PATHWAY	GO_REGULATION_OF_NON_CANONICAL_WNT_SIGNALING_PATHWAY		19	0.3703276	1.0826038	0.36078432	0.5389478	1.0	7660	tags=42%, list=26%, signal=57%
GO_TRANSLATION_INITIATION_FACTOR_BINDING	GO_TRANSLATION_INITIATION_FACTOR_BINDING		27	0.355239	1.0805559	0.37654322	0.54187536	1.0	7121	tags=37%, list=24%, signal=49%
GO_DNA_DEALKYLATION	GO_DNA_DEALKYLATION		19	0.33789006	1.080416	0.34615386	0.5413436	1.0	9258	tags=47%, list=31%, signal=69%
GO_RECEPTOR_CATABOLIC_PROCESS	GO_RECEPTOR_CATABOLIC_PROCESS		16	0.39893278	1.0784189	0.4	0.54404557	1.0	5073	tags=25%, list=17%, signal=30%
GO_LIGAND_DEPENDENT_NUCLEAR_RECEPTOR_TRANSCRIPTION_COACTIVATOR_ACTIVITY	GO_LIGAND_DEPENDENT_NUCLEAR_RECEPTOR_TRANSCRIPTION_COACTIVATOR_ACTIVITY		51	0.2978663	1.0767899	0.33679834	0.5461442	1.0	6399	tags=25%, list=22%, signal=33%
GO_PURINE_NUCLEOBASE_METABOLIC_PROCESS	GO_PURINE_NUCLEOBASE_METABOLIC_PROCESS		20	0.35430735	1.0710105	0.37298387	0.5558598	1.0	6558	tags=35%, list=22%, signal=45%
GO_INTESTINAL_EPITHELIAL_CELL_DIFFERENTIATION	GO_INTESTINAL_EPITHELIAL_CELL_DIFFERENTIATION		16	0.36428908	1.0685663	0.36291912	0.5595747	1.0	1167	tags=13%, list=4%, signal=13%
GO_TRANSMITTER_GATED_CHANNEL_ACTIVITY	GO_TRANSMITTER_GATED_CHANNEL_ACTIVITY		23	0.3458588	1.0685444	0.3659004	0.5588008	1.0	5405	tags=26%, list=18%, signal=32%
GO_NAD_DEPENDENT_PROTEIN_DEACETYLASE_ACTIVITY	GO_NAD_DEPENDENT_PROTEIN_DEACETYLASE_ACTIVITY		17	0.36992842	1.0680556	0.41528925	0.5589366	1.0	5750	tags=41%, list=20%, signal=51%
GO_POSTTRANSCRIPTIONAL_GENE_SILENCING	GO_POSTTRANSCRIPTIONAL_GENE_SILENCING		37	0.3279954	1.0678943	0.3957115	0.55843383	1.0	7729	tags=38%, list=26%, signal=51%
GO_METAL_CLUSTER_BINDING	GO_METAL_CLUSTER_BINDING		63	0.31626174	1.0665885	0.39059305	0.5600383	1.0	1466	tags=14%, list=5%, signal=15%
GO_INTRACELLULAR_ESTROGEN_RECEPTOR_SIGNALING_PATHWAY	GO_INTRACELLULAR_ESTROGEN_RECEPTOR_SIGNALING_PATHWAY		17	0.36725077	1.0657783	0.38163266	0.5607046	1.0	5317	tags=29%, list=18%, signal=36%
GO_MODULATION_BY_VIRUS_OF_HOST_MORPHOLOGY_OR_PHYSIOLOGY	GO_MODULATION_BY_VIRUS_OF_HOST_MORPHOLOGY_OR_PHYSIOLOGY		37	0.30173585	1.0641975	0.373444	0.5628059	1.0	2900	tags=16%, list=10%, signal=18%
GO_POSITIVE_REGULATION_OF_CYSTEINE_TYPE_ENDOPEPTIDASE_ACTIVITY_INVOLVED_IN_APOPTOTIC_SIGNALING_PATHWAY	GO_POSITIVE_REGULATION_OF_CYSTEINE_TYPE_ENDOPEPTIDASE_ACTIVITY_INVOLVED_IN_APOPTOTIC_SIGNALING_PATHWAY		17	0.3479019	1.0594785	0.36755648	0.57053155	1.0	9437	tags=41%, list=32%, signal=61%
GO_REGULATION_OF_HEMATOPOIETIC_PROGENITOR_CELL_DIFFERENTIATION	GO_REGULATION_OF_HEMATOPOIETIC_PROGENITOR_CELL_DIFFERENTIATION		37	0.29962018	1.059453	0.36883628	0.5697647	1.0	2550	tags=14%, list=9%, signal=15%
GO_OLFACTORY_RECEPTOR_ACTIVITY	GO_OLFACTORY_RECEPTOR_ACTIVITY		24	0.35701135	1.0573828	0.36078432	0.5727645	1.0	9215	tags=50%, list=31%, signal=73%
GO_ACYLGLYCEROL_O_ACYLTRANSFERASE_ACTIVITY	GO_ACYLGLYCEROL_O_ACYLTRANSFERASE_ACTIVITY		26	0.31797183	1.057194	0.38212928	0.5723052	1.0	5290	tags=27%, list=18%, signal=33%
GO_PEPTIDYL_THREONINE_MODIFICATION	GO_PEPTIDYL_THREONINE_MODIFICATION		46	0.34032264	1.0568631	0.40631163	0.5720995	1.0	5573	tags=28%, list=19%, signal=35%
GO_EXTRACELLULAR_GLUTAMATE_GATED_ION_CHANNEL_ACTIVITY	GO_EXTRACELLULAR_GLUTAMATE_GATED_ION_CHANNEL_ACTIVITY		20	0.3534557	1.0561606	0.37689394	0.572511	1.0	5405	tags=25%, list=18%, signal=31%
GO_POSITIVE_REGULATION_OF_MITOCHONDRION_ORGANIZATION	GO_POSITIVE_REGULATION_OF_MITOCHONDRION_ORGANIZATION		151	0.23484345	1.0560666	0.36437246	0.57184553	1.0	7184	tags=26%, list=24%, signal=35%
GO_LRR_DOMAIN_BINDING	GO_LRR_DOMAIN_BINDING		17	0.36047688	1.0547508	0.40631163	0.5734532	1.0	15048	tags=71%, list=51%, signal=144%
GO_NUCLEOBASE_CONTAINING_SMALL_MOLECULE_INTERCONVERSION	GO_NUCLEOBASE_CONTAINING_SMALL_MOLECULE_INTERCONVERSION		21	0.3611161	1.0524462	0.39626557	0.57692266	1.0	1558	tags=19%, list=5%, signal=20%
GO_REGULATION_OF_MICROTUBULE_POLYMERIZATION	GO_REGULATION_OF_MICROTUBULE_POLYMERIZATION		30	0.3099089	1.051058	0.3815261	0.57871	1.0	2112	tags=13%, list=7%, signal=14%
GO_NEGATIVE_REGULATION_OF_CELLULAR_AMIDE_METABOLIC_PROCESS	GO_NEGATIVE_REGULATION_OF_CELLULAR_AMIDE_METABOLIC_PROCESS		122	0.2585277	1.0491221	0.37931034	0.58157235	1.0	4439	tags=20%, list=15%, signal=23%
GO_NEGATIVE_REGULATION_OF_TELOMERE_MAINTENANCE	GO_NEGATIVE_REGULATION_OF_TELOMERE_MAINTENANCE		26	0.34034806	1.0477933	0.40490797	0.58326894	1.0	2689	tags=15%, list=9%, signal=17%
GO_GLUTAMATE_RECEPTOR_ACTIVITY	GO_GLUTAMATE_RECEPTOR_ACTIVITY		27	0.3472553	1.0476086	0.39651838	0.5827681	1.0	9331	tags=37%, list=32%, signal=54%
GO_POSITIVE_REGULATION_OF_MICROTUBULE_POLYMERIZATION_OR_DEPOLYMERIZATION	GO_POSITIVE_REGULATION_OF_MICROTUBULE_POLYMERIZATION_OR_DEPOLYMERIZATION		21	0.32203445	1.0457381	0.40524194	0.5853921	1.0	2112	tags=14%, list=7%, signal=15%
GO_REGULATION_OF_INTERFERON_BETA_PRODUCTION	GO_REGULATION_OF_INTERFERON_BETA_PRODUCTION		43	0.2990262	1.0433891	0.38535646	0.58890575	1.0	4087	tags=19%, list=14%, signal=22%
GO_INTERMEDIATE_FILAMENT_CYTOSKELETON	GO_INTERMEDIATE_FILAMENT_CYTOSKELETON		135	0.2420633	1.0429258	0.3574297	0.58893687	1.0	6616	tags=22%, list=22%, signal=29%
GO_PROTEIN_SERINE_THREONINE_KINASE_ACTIVITY	GO_PROTEIN_SERINE_THREONINE_KINASE_ACTIVITY		430	0.23419648	1.03974	0.4107143	0.5940552	1.0	3681	tags=15%, list=13%, signal=17%
GO_TRANSCRIPTION_INITIATION_FROM_RNA_POLYMERASE_II_PROMOTER	GO_TRANSCRIPTION_INITIATION_FROM_RNA_POLYMERASE_II_PROMOTER		150	0.23188567	1.0396008	0.36161616	0.5935003	1.0	6135	tags=24%, list=21%, signal=30%
GO_INTRINSIC_APOPTOTIC_SIGNALING_PATHWAY_IN_RESPONSE_TO_DNA_DAMAGE	GO_INTRINSIC_APOPTOTIC_SIGNALING_PATHWAY_IN_RESPONSE_TO_DNA_DAMAGE		70	0.25586033	1.0393832	0.3752495	0.59307927	1.0	1528	tags=9%, list=5%, signal=9%
GO_CILIARY_PLASM	GO_CILIARY_PLASM		70	0.287776	1.038631	0.41980198	0.59360415	1.0	7188	tags=27%, list=24%, signal=36%
GO_DEAMINASE_ACTIVITY	GO_DEAMINASE_ACTIVITY		32	0.31187037	1.037981	0.4117647	0.5939525	1.0	7007	tags=34%, list=24%, signal=45%
GO_PYRIMIDINE_CONTAINING_COMPOUND_METABOLIC_PROCESS	GO_PYRIMIDINE_CONTAINING_COMPOUND_METABOLIC_PROCESS		71	0.25058296	1.0370249	0.39219713	0.59492457	1.0	9481	tags=39%, list=32%, signal=58%
GO_REGULATION_OF_TELOMERE_MAINTENANCE	GO_REGULATION_OF_TELOMERE_MAINTENANCE		66	0.29929304	1.0370007	0.4092742	0.59414214	1.0	9517	tags=41%, list=32%, signal=60%
GO_SPLICEOSOMAL_TRI_SNRNP_COMPLEX	GO_SPLICEOSOMAL_TRI_SNRNP_COMPLEX		26	0.42610785	1.0363334	0.45322245	0.59458435	1.0	9846	tags=58%, list=33%, signal=87%
GO_90S_PRERIBOSOME	GO_90S_PRERIBOSOME		23	0.40735987	1.0349451	0.44906446	0.5962887	1.0	3524	tags=22%, list=12%, signal=25%
GO_TRANSCRIPTIONAL_REPRESSOR_COMPLEX	GO_TRANSCRIPTIONAL_REPRESSOR_COMPLEX		74	0.29034755	1.0333077	0.41683367	0.598545	1.0	7678	tags=32%, list=26%, signal=44%
GO_NUCLEAR_MEMBRANE	GO_NUCLEAR_MEMBRANE		261	0.2296749	1.032897	0.40625	0.5984864	1.0	6616	tags=23%, list=22%, signal=30%
GO_B_CELL_ACTIVATION_INVOLVED_IN_IMMUNE_RESPONSE	GO_B_CELL_ACTIVATION_INVOLVED_IN_IMMUNE_RESPONSE		34	0.31409615	1.0301615	0.40650406	0.60275996	1.0	4127	tags=18%, list=14%, signal=21%
GO_CELLULAR_COMPONENT_ASSEMBLY_INVOLVED_IN_MORPHOGENESIS	GO_CELLULAR_COMPONENT_ASSEMBLY_INVOLVED_IN_MORPHOGENESIS		220	0.25410745	1.0301416	0.4084507	0.6019748	1.0	4324	tags=16%, list=15%, signal=19%
GO_K63_LINKED_POLYUBIQUITIN_BINDING	GO_K63_LINKED_POLYUBIQUITIN_BINDING		17	0.36405358	1.0290283	0.42524272	0.6032399	1.0	3148	tags=18%, list=11%, signal=20%
GO_CELL_DIFFERENTIATION_INVOLVED_IN_EMBRYONIC_PLACENTA_DEVELOPMENT	GO_CELL_DIFFERENTIATION_INVOLVED_IN_EMBRYONIC_PLACENTA_DEVELOPMENT		24	0.34431416	1.0282066	0.4296875	0.6039136	1.0	3292	tags=21%, list=11%, signal=23%
GO_PRESYNAPTIC_ACTIVE_ZONE	GO_PRESYNAPTIC_ACTIVE_ZONE		27	0.33334544	1.0269281	0.42299795	0.6054991	1.0	12815	tags=63%, list=44%, signal=111%
GO_REGULATION_OF_MRNA_3_END_PROCESSING	GO_REGULATION_OF_MRNA_3_END_PROCESSING		26	0.33746958	1.0261068	0.44	0.6062384	1.0	10324	tags=50%, list=35%, signal=77%
GO_TRANSCRIPTION_FACTOR_COMPLEX	GO_TRANSCRIPTION_FACTOR_COMPLEX		280	0.23391636	1.0260553	0.41851106	0.60550976	1.0	8236	tags=32%, list=28%, signal=44%
GO_GASTRULATION_WITH_MOUTH_FORMING_SECOND	GO_GASTRULATION_WITH_MOUTH_FORMING_SECOND		25	0.31960532	1.0240936	0.39717743	0.60836285	1.0	4937	tags=24%, list=17%, signal=29%
GO_MEMBRANE_LIPID_CATABOLIC_PROCESS	GO_MEMBRANE_LIPID_CATABOLIC_PROCESS		23	0.32765207	1.0233501	0.40983605	0.60886204	1.0	5866	tags=26%, list=20%, signal=33%
GO_TRANSCRIPTIONALLY_ACTIVE_CHROMATIN	GO_TRANSCRIPTIONALLY_ACTIVE_CHROMATIN		16	0.33682573	1.0217053	0.44147843	0.61110675	1.0	4708	tags=25%, list=16%, signal=30%
GO_REGULATION_OF_PROTEIN_ACETYLATION	GO_REGULATION_OF_PROTEIN_ACETYLATION		60	0.26463798	1.0199113	0.43030304	0.61364794	1.0	4861	tags=22%, list=17%, signal=26%
GO_KINASE_ACTIVATOR_ACTIVITY	GO_KINASE_ACTIVATOR_ACTIVITY		60	0.26152968	1.0195704	0.43353784	0.61340535	1.0	5991	tags=20%, list=20%, signal=25%
GO_CYTOPLASMIC_MICROTUBULE_ORGANIZATION	GO_CYTOPLASMIC_MICROTUBULE_ORGANIZATION		38	0.28429577	1.0193768	0.422449	0.61292845	1.0	4074	tags=24%, list=14%, signal=27%
GO_RNA_POLYADENYLATION	GO_RNA_POLYADENYLATION		28	0.32157728	1.0190173	0.4375	0.61276305	1.0	10184	tags=46%, list=35%, signal=71%
GO_VOLTAGE_GATED_ANION_CHANNEL_ACTIVITY	GO_VOLTAGE_GATED_ANION_CHANNEL_ACTIVITY		17	0.35337052	1.0182174	0.42629483	0.6135106	1.0	315	tags=12%, list=1%, signal=12%
GO_REGULATION_OF_TRANSLATIONAL_FIDELITY	GO_REGULATION_OF_TRANSLATIONAL_FIDELITY		15	0.3840243	1.0176171	0.45020747	0.61388844	1.0	9421	tags=47%, list=32%, signal=69%
GO_INTRINSIC_APOPTOTIC_SIGNALING_PATHWAY	GO_INTRINSIC_APOPTOTIC_SIGNALING_PATHWAY		149	0.2244304	1.0175924	0.39014372	0.61310196	1.0	3294	tags=11%, list=11%, signal=13%
GO_REGULATION_OF_RNA_STABILITY	GO_REGULATION_OF_RNA_STABILITY		134	0.27340233	1.0150433	0.40808082	0.61708415	1.0	9696	tags=33%, list=33%, signal=49%
GO_RESPONSE_TO_LIGHT_STIMULUS	GO_RESPONSE_TO_LIGHT_STIMULUS		258	0.21711594	1.0146158	0.38114753	0.6170312	1.0	4542	tags=16%, list=15%, signal=18%
GO_REGULATION_OF_MEGAKARYOCYTE_DIFFERENTIATION	GO_REGULATION_OF_MEGAKARYOCYTE_DIFFERENTIATION		24	0.33596724	1.014468	0.45180723	0.61648667	1.0	2550	tags=17%, list=9%, signal=18%
GO_U4_U6_X_U5_TRI_SNRNP_COMPLEX	GO_U4_U6_X_U5_TRI_SNRNP_COMPLEX		21	0.41449165	1.014262	0.47689074	0.6160305	1.0	3294	tags=29%, list=11%, signal=32%
GO_RESPONSE_TO_INTERLEUKIN_4	GO_RESPONSE_TO_INTERLEUKIN_4		29	0.30342337	1.014198	0.43495935	0.6153134	1.0	2130	tags=14%, list=7%, signal=15%
GO_RAC_GTPASE_BINDING	GO_RAC_GTPASE_BINDING		38	0.30772546	1.0138993	0.446	0.6150871	1.0	5347	tags=21%, list=18%, signal=26%
GO_RIBOSOMAL_LARGE_SUBUNIT_BIOGENESIS	GO_RIBOSOMAL_LARGE_SUBUNIT_BIOGENESIS		48	0.38855115	1.0115131	0.48547718	0.6188394	1.0	8628	tags=42%, list=29%, signal=59%
GO_NEGATIVE_REGULATION_OF_PROTEIN_ACETYLATION	GO_NEGATIVE_REGULATION_OF_PROTEIN_ACETYLATION		19	0.32483405	1.0096322	0.42655936	0.6215919	1.0	4354	tags=21%, list=15%, signal=25%
GO_AXONEME_ASSEMBLY	GO_AXONEME_ASSEMBLY		35	0.30772066	1.0085846	0.43083003	0.6227814	1.0	4050	tags=20%, list=14%, signal=23%
GO_REGULATION_OF_CIRCADIAN_RHYTHM	GO_REGULATION_OF_CIRCADIAN_RHYTHM		95	0.2572444	1.0084859	0.45328033	0.62213993	1.0	8502	tags=33%, list=29%, signal=46%
GO_SMALL_SUBUNIT_PROCESSOME	GO_SMALL_SUBUNIT_PROCESSOME		33	0.36437634	1.0084432	0.47268906	0.6213939	1.0	2438	tags=18%, list=8%, signal=20%
GO_REGULATION_OF_FEEDING_BEHAVIOR	GO_REGULATION_OF_FEEDING_BEHAVIOR		17	0.3345007	1.0074531	0.43639922	0.62242794	1.0	8501	tags=41%, list=29%, signal=58%
GO_SNORNA_BINDING	GO_SNORNA_BINDING		25	0.36349788	1.005346	0.4587525	0.6255825	1.0	5892	tags=28%, list=20%, signal=35%
GO_GPI_ANCHOR_METABOLIC_PROCESS	GO_GPI_ANCHOR_METABOLIC_PROCESS		32	0.31598788	1.0034506	0.45714286	0.62845457	1.0	8638	tags=34%, list=29%, signal=49%
GO_O_ACYLTRANSFERASE_ACTIVITY	GO_O_ACYLTRANSFERASE_ACTIVITY		44	0.26465765	1.0029283	0.4368932	0.62859505	1.0	3038	tags=16%, list=10%, signal=18%
GO_EPITHELIAL_CILIUM_MOVEMENT	GO_EPITHELIAL_CILIUM_MOVEMENT		17	0.36598518	1.0027744	0.4618474	0.628042	1.0	7375	tags=35%, list=25%, signal=47%
GO_RIBONUCLEOPROTEIN_GRANULE	GO_RIBONUCLEOPROTEIN_GRANULE		140	0.24626157	1.001105	0.4626556	0.6303931	1.0	9016	tags=32%, list=31%, signal=46%
GO_POSITIVE_REGULATION_OF_CALCIUM_ION_DEPENDENT_EXOCYTOSIS	GO_POSITIVE_REGULATION_OF_CALCIUM_ION_DEPENDENT_EXOCYTOSIS		22	0.3235653	1.0001734	0.45652175	0.6313439	1.0	4313	tags=27%, list=15%, signal=32%
GO_THYROID_HORMONE_RECEPTOR_BINDING	GO_THYROID_HORMONE_RECEPTOR_BINDING		30	0.3056334	1.000137	0.44970414	0.6305766	1.0	5900	tags=30%, list=20%, signal=37%
GO_NUCLEAR_ENVELOPE	GO_NUCLEAR_ENVELOPE		390	0.21949251	0.9993788	0.43958333	0.63116485	1.0	6641	tags=24%, list=23%, signal=30%
GO_SINGLE_STRANDED_RNA_BINDING	GO_SINGLE_STRANDED_RNA_BINDING		63	0.2726023	0.99720365	0.462845	0.63448024	1.0	10776	tags=44%, list=37%, signal=70%
GO_HYDROLASE_ACTIVITY_ACTING_ON_GLYCOSYL_BONDS	GO_HYDROLASE_ACTIVITY_ACTING_ON_GLYCOSYL_BONDS		108	0.23822068	0.995826	0.45233265	0.6362491	1.0	8821	tags=32%, list=30%, signal=46%
GO_DNA_TEMPLATED_TRANSCRIPTION_INITIATION	GO_DNA_TEMPLATED_TRANSCRIPTION_INITIATION		194	0.22068834	0.9940113	0.45102042	0.6388959	1.0	6135	tags=23%, list=21%, signal=28%
GO_PYRIMIDINE_NUCLEOSIDE_METABOLIC_PROCESS	GO_PYRIMIDINE_NUCLEOSIDE_METABOLIC_PROCESS		45	0.2628691	0.99373484	0.46597937	0.6385817	1.0	6417	tags=27%, list=22%, signal=34%
GO_CELL_DEATH_IN_RESPONSE_TO_OXIDATIVE_STRESS	GO_CELL_DEATH_IN_RESPONSE_TO_OXIDATIVE_STRESS		18	0.33029544	0.9930012	0.4729459	0.63919127	1.0	3145	tags=17%, list=11%, signal=19%
GO_NEGATIVE_REGULATION_OF_REPRODUCTIVE_PROCESS	GO_NEGATIVE_REGULATION_OF_REPRODUCTIVE_PROCESS		48	0.2548858	0.9918614	0.4547244	0.64053154	1.0	5867	tags=25%, list=20%, signal=31%
GO_CORE_PROMOTER_BINDING	GO_CORE_PROMOTER_BINDING		143	0.2520271	0.9913551	0.45081967	0.6406666	1.0	5207	tags=20%, list=18%, signal=25%
GO_POSITIVE_REGULATION_OF_NEUROBLAST_PROLIFERATION	GO_POSITIVE_REGULATION_OF_NEUROBLAST_PROLIFERATION		20	0.34275147	0.9896195	0.45401174	0.6432452	1.0	4493	tags=25%, list=15%, signal=29%
GO_NUCLEAR_LOCALIZATION_SEQUENCE_BINDING	GO_NUCLEAR_LOCALIZATION_SEQUENCE_BINDING		20	0.3542588	0.98896855	0.48508945	0.6436581	1.0	7296	tags=35%, list=25%, signal=47%
GO_NEUROPEPTIDE_RECEPTOR_BINDING	GO_NEUROPEPTIDE_RECEPTOR_BINDING		24	0.32309029	0.98842853	0.5	0.6438439	1.0	7883	tags=38%, list=27%, signal=51%
GO_TRANSCRIPTION_COACTIVATOR_ACTIVITY	GO_TRANSCRIPTION_COACTIVATOR_ACTIVITY		286	0.22409949	0.988381	0.45472836	0.6431082	1.0	5981	tags=23%, list=20%, signal=29%
GO_PHOTORECEPTOR_CELL_DEVELOPMENT	GO_PHOTORECEPTOR_CELL_DEVELOPMENT		37	0.27214438	0.98702794	0.460039	0.6448835	1.0	10548	tags=46%, list=36%, signal=72%
GO_PROTEIN_TYROSINE_SERINE_THREONINE_PHOSPHATASE_ACTIVITY	GO_PROTEIN_TYROSINE_SERINE_THREONINE_PHOSPHATASE_ACTIVITY		42	0.257487	0.98599935	0.48214287	0.64602965	1.0	10291	tags=43%, list=35%, signal=66%
GO_REGULATION_OF_PROTEIN_INSERTION_INTO_MITOCHONDRIAL_MEMBRANE_INVOLVED_IN_APOPTOTIC_SIGNALING_PATHWAY	GO_REGULATION_OF_PROTEIN_INSERTION_INTO_MITOCHONDRIAL_MEMBRANE_INVOLVED_IN_APOPTOTIC_SIGNALING_PATHWAY		29	0.28569442	0.9858315	0.45167652	0.64549905	1.0	7184	tags=31%, list=24%, signal=41%
GO_PALMITOYLTRANSFERASE_ACTIVITY	GO_PALMITOYLTRANSFERASE_ACTIVITY		36	0.2738529	0.9852543	0.47	0.64579207	1.0	4091	tags=22%, list=14%, signal=26%
GO_UBIQUITIN_LIKE_PROTEIN_SPECIFIC_PROTEASE_ACTIVITY	GO_UBIQUITIN_LIKE_PROTEIN_SPECIFIC_PROTEASE_ACTIVITY		92	0.2617379	0.98485863	0.4616896	0.64573133	1.0	4722	tags=18%, list=16%, signal=22%
GO_FERTILIZATION	GO_FERTILIZATION		117	0.21716401	0.9838663	0.45309383	0.6468355	1.0	11564	tags=44%, list=39%, signal=73%
GO_DETECTION_OF_LIGHT_STIMULUS_INVOLVED_IN_SENSORY_PERCEPTION	GO_DETECTION_OF_LIGHT_STIMULUS_INVOLVED_IN_SENSORY_PERCEPTION		16	0.34401625	0.9834464	0.47528517	0.6468216	1.0	11605	tags=56%, list=39%, signal=93%
GO_INTERMEDIATE_FILAMENT	GO_INTERMEDIATE_FILAMENT		94	0.25228095	0.9833652	0.45596868	0.64613676	1.0	6122	tags=20%, list=21%, signal=25%
GO_REGULATION_OF_RECEPTOR_BIOSYNTHETIC_PROCESS	GO_REGULATION_OF_RECEPTOR_BIOSYNTHETIC_PROCESS		21	0.30047762	0.9833566	0.48670757	0.645326	1.0	6986	tags=29%, list=24%, signal=37%
GO_PROTEIN_N_TERMINUS_BINDING	GO_PROTEIN_N_TERMINUS_BINDING		101	0.22958446	0.98227483	0.47933885	0.64647675	1.0	7521	tags=31%, list=26%, signal=41%
GO_CILIUM	GO_CILIUM		397	0.2186524	0.9810218	0.4527559	0.64811116	1.0	4832	tags=17%, list=16%, signal=20%
GO_PYRIMIDINE_NUCLEOTIDE_METABOLIC_PROCESS	GO_PYRIMIDINE_NUCLEOTIDE_METABOLIC_PROCESS		44	0.27433118	0.97996116	0.47379455	0.6492687	1.0	8768	tags=41%, list=30%, signal=58%
GO_MITOGEN_ACTIVATED_PROTEIN_KINASE_KINASE_BINDING	GO_MITOGEN_ACTIVATED_PROTEIN_KINASE_KINASE_BINDING		16	0.32313666	0.97965264	0.4751491	0.64902574	1.0	11018	tags=50%, list=37%, signal=80%
GO_REGULATION_OF_PROTEIN_CATABOLIC_PROCESS	GO_REGULATION_OF_PROTEIN_CATABOLIC_PROCESS		378	0.21429487	0.9781454	0.47181627	0.651024	1.0	5577	tags=19%, list=19%, signal=23%
GO_PROTEIN_COMPLEX_LOCALIZATION	GO_PROTEIN_COMPLEX_LOCALIZATION		51	0.27176473	0.9777804	0.47046843	0.65088063	1.0	6339	tags=25%, list=22%, signal=32%
GO_SUMO_TRANSFERASE_ACTIVITY	GO_SUMO_TRANSFERASE_ACTIVITY		15	0.34593478	0.9774116	0.504931	0.65075517	1.0	10	tags=7%, list=0%, signal=7%
GO_REGULATION_OF_PROTEIN_EXPORT_FROM_NUCLEUS	GO_REGULATION_OF_PROTEIN_EXPORT_FROM_NUCLEUS		33	0.26950312	0.9772363	0.47991967	0.6502538	1.0	4096	tags=18%, list=14%, signal=21%
GO_NEGATIVE_REGULATION_OF_TRANSLATIONAL_INITIATION	GO_NEGATIVE_REGULATION_OF_TRANSLATIONAL_INITIATION		20	0.3299642	0.9766108	0.48953974	0.65061283	1.0	5421	tags=20%, list=18%, signal=25%
GO_ENHANCER_BINDING	GO_ENHANCER_BINDING		87	0.2659384	0.9757563	0.47094187	0.65143883	1.0	8739	tags=38%, list=30%, signal=54%
GO_RECEPTOR_SIGNALING_COMPLEX_SCAFFOLD_ACTIVITY	GO_RECEPTOR_SIGNALING_COMPLEX_SCAFFOLD_ACTIVITY		23	0.3074954	0.97511	0.48638132	0.6518916	1.0	6525	tags=35%, list=22%, signal=45%
GO_SINGLE_FERTILIZATION	GO_SINGLE_FERTILIZATION		86	0.22391036	0.9745221	0.4888438	0.6522356	1.0	10922	tags=43%, list=37%, signal=68%
GO_PROTEASOMAL_PROTEIN_CATABOLIC_PROCESS	GO_PROTEASOMAL_PROTEIN_CATABOLIC_PROCESS		264	0.23731804	0.97357947	0.4748954	0.6532566	1.0	5562	tags=19%, list=19%, signal=24%
GO_MAINTENANCE_OF_LOCATION_IN_CELL	GO_MAINTENANCE_OF_LOCATION_IN_CELL		93	0.2350479	0.9713049	0.49407116	0.65683126	1.0	2794	tags=12%, list=9%, signal=13%
GO_THIOL_DEPENDENT_UBIQUITIN_SPECIFIC_PROTEASE_ACTIVITY	GO_THIOL_DEPENDENT_UBIQUITIN_SPECIFIC_PROTEASE_ACTIVITY		69	0.26826096	0.96934247	0.49126214	0.6597433	1.0	4722	tags=17%, list=16%, signal=21%
GO_POLYSOME	GO_POLYSOME		38	0.28665078	0.9686921	0.49176955	0.6601663	1.0	9607	tags=39%, list=33%, signal=59%
GO_PEPTIDYL_SERINE_MODIFICATION	GO_PEPTIDYL_SERINE_MODIFICATION		146	0.24332115	0.96817976	0.50097466	0.66025937	1.0	5930	tags=23%, list=20%, signal=29%
GO_RESPONSE_TO_NERVE_GROWTH_FACTOR	GO_RESPONSE_TO_NERVE_GROWTH_FACTOR		37	0.2968006	0.9658438	0.5307692	0.66406184	1.0	2003	tags=14%, list=7%, signal=14%
GO_RIBOSOMAL_LARGE_SUBUNIT_ASSEMBLY	GO_RIBOSOMAL_LARGE_SUBUNIT_ASSEMBLY		23	0.40094	0.9647831	0.51983297	0.6652482	1.0	11153	tags=57%, list=38%, signal=91%
GO_PRIMARY_CILIUM	GO_PRIMARY_CILIUM		182	0.23301531	0.9633399	0.4749499	0.6672044	1.0	4985	tags=18%, list=17%, signal=22%
GO_NUCLEAR_NUCLEOSOME	GO_NUCLEAR_NUCLEOSOME		29	0.37055853	0.96185094	0.4795082	0.6692105	1.0	7713	tags=34%, list=26%, signal=47%
GO_RNA_POLYMERASE_II_TRANSCRIPTION_COREPRESSOR_ACTIVITY	GO_RNA_POLYMERASE_II_TRANSCRIPTION_COREPRESSOR_ACTIVITY		24	0.3054848	0.9612049	0.50769234	0.6695743	1.0	8487	tags=42%, list=29%, signal=59%
GO_AXONEME_PART	GO_AXONEME_PART		20	0.3182994	0.95938945	0.49385247	0.67226535	1.0	10670	tags=45%, list=36%, signal=71%
GO_RNA_DESTABILIZATION	GO_RNA_DESTABILIZATION		15	0.3630026	0.9588239	0.49129593	0.6725154	1.0	3820	tags=27%, list=13%, signal=31%
GO_MRNA_3_UTR_BINDING	GO_MRNA_3_UTR_BINDING		47	0.28213447	0.95869744	0.49156117	0.67194605	1.0	5387	tags=28%, list=18%, signal=34%
GO_NEURAL_TUBE_FORMATION	GO_NEURAL_TUBE_FORMATION		93	0.2586013	0.95675063	0.47792706	0.67490304	1.0	5483	tags=24%, list=19%, signal=29%
GO_DNA_DIRECTED_RNA_POLYMERASE_II_CORE_COMPLEX	GO_DNA_DIRECTED_RNA_POLYMERASE_II_CORE_COMPLEX		15	0.34570202	0.9553592	0.5180723	0.676748	1.0	6017	tags=27%, list=20%, signal=34%
GO_LEUKOCYTE_APOPTOTIC_PROCESS	GO_LEUKOCYTE_APOPTOTIC_PROCESS		22	0.30515084	0.9550575	0.4969574	0.67650086	1.0	2521	tags=14%, list=9%, signal=15%
GO_PHOSPHATIDYLETHANOLAMINE_METABOLIC_PROCESS	GO_PHOSPHATIDYLETHANOLAMINE_METABOLIC_PROCESS		17	0.32353663	0.9532969	0.51950717	0.6791031	1.0	8673	tags=47%, list=29%, signal=67%
GO_IONOTROPIC_GLUTAMATE_RECEPTOR_SIGNALING_PATHWAY	GO_IONOTROPIC_GLUTAMATE_RECEPTOR_SIGNALING_PATHWAY		24	0.29678857	0.95275486	0.5281955	0.6793149	1.0	5405	tags=25%, list=18%, signal=31%
GO_RIBOSOME_BIOGENESIS	GO_RIBOSOME_BIOGENESIS		300	0.30682218	0.95250714	0.49166667	0.67895365	1.0	9678	tags=34%, list=33%, signal=51%
GO_NEGATIVE_REGULATION_OF_BINDING	GO_NEGATIVE_REGULATION_OF_BINDING		127	0.22378154	0.9502505	0.54174757	0.68256545	1.0	8610	tags=30%, list=29%, signal=42%
GO_ORGANELLE_LOCALIZATION	GO_ORGANELLE_LOCALIZATION		396	0.20424971	0.94891584	0.4880478	0.684349	1.0	1912	tags=10%, list=7%, signal=10%
GO_GABA_RECEPTOR_COMPLEX	GO_GABA_RECEPTOR_COMPLEX		16	0.34496158	0.94524324	0.513834	0.6907141	1.0	8380	tags=44%, list=28%, signal=61%
GO_MANNOSYLTRANSFERASE_ACTIVITY	GO_MANNOSYLTRANSFERASE_ACTIVITY		25	0.2913041	0.9436779	0.5244898	0.69293743	1.0	8716	tags=36%, list=30%, signal=51%
GO_SULFUR_COMPOUND_TRANSPORT	GO_SULFUR_COMPOUND_TRANSPORT		31	0.27344728	0.9425058	0.53974897	0.6943487	1.0	1998	tags=13%, list=7%, signal=14%
GO_TELOMERE_MAINTENANCE_VIA_TELOMERASE	GO_TELOMERE_MAINTENANCE_VIA_TELOMERASE		17	0.3226455	0.9416759	0.53061223	0.6951063	1.0	2765	tags=18%, list=9%, signal=19%
GO_POSITIVE_REGULATION_OF_MRNA_METABOLIC_PROCESS	GO_POSITIVE_REGULATION_OF_MRNA_METABOLIC_PROCESS		41	0.2790346	0.94019014	0.5301205	0.69721794	1.0	10719	tags=46%, list=36%, signal=73%
GO_PROTEIN_LOCALIZATION_TO_NUCLEUS	GO_PROTEIN_LOCALIZATION_TO_NUCLEUS		151	0.22593978	0.939756	0.51731163	0.69724643	1.0	8739	tags=32%, list=30%, signal=45%
GO_POSITIVE_REGULATION_OF_TRANSCRIPTION_INITIATION_FROM_RNA_POLYMERASE_II_PROMOTER	GO_POSITIVE_REGULATION_OF_TRANSCRIPTION_INITIATION_FROM_RNA_POLYMERASE_II_PROMOTER		17	0.31245393	0.93914175	0.5252525	0.6975714	1.0	8309	tags=35%, list=28%, signal=49%
GO_CILIUM_MOVEMENT	GO_CILIUM_MOVEMENT		31	0.29799265	0.93877006	0.51497006	0.6975022	1.0	4050	tags=19%, list=14%, signal=22%
GO_POSTTRANSCRIPTIONAL_REGULATION_OF_GENE_EXPRESSION	GO_POSTTRANSCRIPTIONAL_REGULATION_OF_GENE_EXPRESSION		418	0.21393594	0.93858606	0.513347	0.6970358	1.0	9797	tags=32%, list=33%, signal=47%
GO_REGULATION_OF_OLIGODENDROCYTE_DIFFERENTIATION	GO_REGULATION_OF_OLIGODENDROCYTE_DIFFERENTIATION		26	0.28278306	0.93749493	0.5483871	0.6983565	1.0	6396	tags=35%, list=22%, signal=44%
GO_POLYOL_TRANSPORT	GO_POLYOL_TRANSPORT		17	0.31790507	0.9365674	0.55737704	0.699324	1.0	2033	tags=12%, list=7%, signal=13%
GO_DETECTION_OF_CHEMICAL_STIMULUS_INVOLVED_IN_SENSORY_PERCEPTION_OF_TASTE	GO_DETECTION_OF_CHEMICAL_STIMULUS_INVOLVED_IN_SENSORY_PERCEPTION_OF_TASTE		22	0.31101587	0.9364616	0.53571427	0.6986585	1.0	11334	tags=55%, list=39%, signal=89%
GO_REGULATION_OF_TOR_SIGNALING	GO_REGULATION_OF_TOR_SIGNALING		63	0.24970514	0.93282175	0.5203252	0.7049297	1.0	5438	tags=22%, list=18%, signal=27%
GO_NEGATIVE_REGULATION_OF_HISTONE_ACETYLATION	GO_NEGATIVE_REGULATION_OF_HISTONE_ACETYLATION		15	0.3176737	0.9309782	0.5313131	0.7076268	1.0	4354	tags=20%, list=15%, signal=23%
GO_CARBOXY_TERMINAL_DOMAIN_PROTEIN_KINASE_COMPLEX	GO_CARBOXY_TERMINAL_DOMAIN_PROTEIN_KINASE_COMPLEX		22	0.30724707	0.9300779	0.5226782	0.70859545	1.0	4109	tags=18%, list=14%, signal=21%
GO_POSITIVE_REGULATION_OF_CELLULAR_PROTEIN_LOCALIZATION	GO_POSITIVE_REGULATION_OF_CELLULAR_PROTEIN_LOCALIZATION		335	0.19567122	0.92984176	0.55226827	0.70817393	1.0	6642	tags=23%, list=23%, signal=29%
GO_RRNA_METABOLIC_PROCESS	GO_RRNA_METABOLIC_PROCESS		249	0.30670843	0.9283349	0.5175258	0.71030104	1.0	9678	tags=33%, list=33%, signal=49%
GO_NEGATIVE_REGULATION_OF_CATABOLIC_PROCESS	GO_NEGATIVE_REGULATION_OF_CATABOLIC_PROCESS		194	0.20165496	0.9274534	0.57200813	0.7111331	1.0	2701	tags=11%, list=9%, signal=12%
GO_NEGATIVE_REGULATION_OF_SIGNAL_TRANSDUCTION_BY_P53_CLASS_MEDIATOR	GO_NEGATIVE_REGULATION_OF_SIGNAL_TRANSDUCTION_BY_P53_CLASS_MEDIATOR		27	0.27933708	0.92732054	0.5308642	0.71053827	1.0	6695	tags=26%, list=23%, signal=34%
GO_SPINAL_CORD_MOTOR_NEURON_DIFFERENTIATION	GO_SPINAL_CORD_MOTOR_NEURON_DIFFERENTIATION		33	0.2924576	0.9262648	0.5506692	0.71174455	1.0	6396	tags=27%, list=22%, signal=35%
GO_RESPONSE_TO_DSRNA	GO_RESPONSE_TO_DSRNA		51	0.25083214	0.9261361	0.5303644	0.7111327	1.0	4439	tags=18%, list=15%, signal=21%
GO_TRANSCRIPTION_ELONGATION_FACTOR_COMPLEX	GO_TRANSCRIPTION_ELONGATION_FACTOR_COMPLEX		39	0.26221544	0.9252064	0.53304905	0.7121198	1.0	11909	tags=51%, list=40%, signal=86%
GO_EMBRYONIC_DIGIT_MORPHOGENESIS	GO_EMBRYONIC_DIGIT_MORPHOGENESIS		59	0.26613972	0.9241569	0.5513308	0.7133462	1.0	10606	tags=42%, list=36%, signal=66%
GO_REGULATION_OF_MITOCHONDRIAL_OUTER_MEMBRANE_PERMEABILIZATION_INVOLVED_IN_APOPTOTIC_SIGNALING_PATHWAY	GO_REGULATION_OF_MITOCHONDRIAL_OUTER_MEMBRANE_PERMEABILIZATION_INVOLVED_IN_APOPTOTIC_SIGNALING_PATHWAY		42	0.2549141	0.9219477	0.5748503	0.7166548	1.0	7184	tags=26%, list=24%, signal=35%
GO_MULTICELLULAR_ORGANISM_GROWTH	GO_MULTICELLULAR_ORGANISM_GROWTH		73	0.23391293	0.9215765	0.598	0.71651155	1.0	1903	tags=11%, list=6%, signal=12%
GO_REGULATION_OF_GLUCOSE_TRANSPORT	GO_REGULATION_OF_GLUCOSE_TRANSPORT		94	0.22929807	0.92098224	0.55870444	0.71682566	1.0	6616	tags=27%, list=22%, signal=34%
GO_SENSORY_PERCEPTION_OF_TASTE	GO_SENSORY_PERCEPTION_OF_TASTE		36	0.2720678	0.9205709	0.546169	0.71682453	1.0	11334	tags=44%, list=39%, signal=72%
GO_ACTIVATION_OF_NF_KAPPAB_INDUCING_KINASE_ACTIVITY	GO_ACTIVATION_OF_NF_KAPPAB_INDUCING_KINASE_ACTIVITY		16	0.31872165	0.9200831	0.54761904	0.7168905	1.0	3886	tags=25%, list=13%, signal=29%
GO_NEGATIVE_REGULATION_OF_BEHAVIOR	GO_NEGATIVE_REGULATION_OF_BEHAVIOR		15	0.34003848	0.9197462	0.5826772	0.71667534	1.0	8501	tags=33%, list=29%, signal=47%
GO_DNA_DIRECTED_RNA_POLYMERASE_III_COMPLEX	GO_DNA_DIRECTED_RNA_POLYMERASE_III_COMPLEX		18	0.3411368	0.9158712	0.5489796	0.7234167	1.0	3173	tags=17%, list=11%, signal=19%
GO_OMEGA_PEPTIDASE_ACTIVITY	GO_OMEGA_PEPTIDASE_ACTIVITY		17	0.3079394	0.9156121	0.56745183	0.7230705	1.0	5394	tags=29%, list=18%, signal=36%
GO_PYRIMIDINE_RIBONUCLEOSIDE_TRIPHOSPHATE_METABOLIC_PROCESS	GO_PYRIMIDINE_RIBONUCLEOSIDE_TRIPHOSPHATE_METABOLIC_PROCESS		15	0.34481782	0.9128085	0.57024795	0.72767174	1.0	4162	tags=27%, list=14%, signal=31%
GO_CELLULAR_RESPONSE_TO_EPIDERMAL_GROWTH_FACTOR_STIMULUS	GO_CELLULAR_RESPONSE_TO_EPIDERMAL_GROWTH_FACTOR_STIMULUS		23	0.29102394	0.9126069	0.552	0.7272103	1.0	251	tags=9%, list=1%, signal=9%
GO_MOTILE_CILIUM	GO_MOTILE_CILIUM		85	0.22578101	0.91259927	0.55780935	0.7263656	1.0	8234	tags=28%, list=28%, signal=39%
GO_POSITIVE_REGULATION_OF_PROTEIN_LOCALIZATION_TO_NUCLEUS	GO_POSITIVE_REGULATION_OF_PROTEIN_LOCALIZATION_TO_NUCLEUS		126	0.22165549	0.9099065	0.605428	0.73074883	1.0	3380	tags=14%, list=11%, signal=16%
GO_POSITIVE_REGULATION_OF_CELLULAR_PROTEIN_CATABOLIC_PROCESS	GO_POSITIVE_REGULATION_OF_CELLULAR_PROTEIN_CATABOLIC_PROCESS		186	0.21917789	0.90605795	0.55284554	0.73752767	1.0	6324	tags=22%, list=21%, signal=27%
GO_REGULATION_OF_TRANSLATION_IN_RESPONSE_TO_STRESS	GO_REGULATION_OF_TRANSLATION_IN_RESPONSE_TO_STRESS		19	0.2910906	0.90501946	0.574	0.7387377	1.0	4046	tags=16%, list=14%, signal=18%
GO_RESPONSE_TO_GONADOTROPIN	GO_RESPONSE_TO_GONADOTROPIN		24	0.28401777	0.90335715	0.601227	0.7411654	1.0	551	tags=8%, list=2%, signal=8%
GO_ALDITOL_METABOLIC_PROCESS	GO_ALDITOL_METABOLIC_PROCESS		18	0.31849918	0.9028851	0.5810811	0.7411971	1.0	2487	tags=22%, list=8%, signal=24%
GO_RNA_POLYMERASE_II_DISTAL_ENHANCER_SEQUENCE_SPECIFIC_DNA_BINDING	GO_RNA_POLYMERASE_II_DISTAL_ENHANCER_SEQUENCE_SPECIFIC_DNA_BINDING		60	0.24946913	0.9017989	0.58217824	0.74246925	1.0	7484	tags=33%, list=25%, signal=45%
GO_LYSOPHOSPHOLIPID_ACYLTRANSFERASE_ACTIVITY	GO_LYSOPHOSPHOLIPID_ACYLTRANSFERASE_ACTIVITY		17	0.28936496	0.89844334	0.6121673	0.7482513	1.0	5290	tags=24%, list=18%, signal=29%
GO_PEPTIDE_HORMONE_RECEPTOR_BINDING	GO_PEPTIDE_HORMONE_RECEPTOR_BINDING		15	0.32062098	0.89820766	0.62109375	0.7478342	1.0	7787	tags=40%, list=26%, signal=54%
GO_POSITIVE_REGULATION_OF_PEPTIDYL_THREONINE_PHOSPHORYLATION	GO_POSITIVE_REGULATION_OF_PEPTIDYL_THREONINE_PHOSPHORYLATION		24	0.28033438	0.89751077	0.61508703	0.7483913	1.0	3874	tags=17%, list=13%, signal=19%
GO_NEGATIVE_REGULATION_OF_TOR_SIGNALING	GO_NEGATIVE_REGULATION_OF_TOR_SIGNALING		30	0.2655642	0.8956273	0.61376673	0.7511727	1.0	5109	tags=20%, list=17%, signal=24%
GO_GLOBAL_GENOME_NUCLEOTIDE_EXCISION_REPAIR	GO_GLOBAL_GENOME_NUCLEOTIDE_EXCISION_REPAIR		32	0.2779187	0.89376646	0.59210527	0.753982	1.0	5851	tags=22%, list=20%, signal=27%
GO_BICARBONATE_TRANSMEMBRANE_TRANSPORTER_ACTIVITY	GO_BICARBONATE_TRANSMEMBRANE_TRANSPORTER_ACTIVITY		19	0.29462847	0.89329207	0.6277228	0.7540767	1.0	1798	tags=11%, list=6%, signal=11%
GO_DOPAMINERGIC_NEURON_DIFFERENTIATION	GO_DOPAMINERGIC_NEURON_DIFFERENTIATION		26	0.28934464	0.89249474	0.6237817	0.75478905	1.0	5765	tags=27%, list=20%, signal=33%
GO_RRNA_MODIFICATION	GO_RRNA_MODIFICATION		27	0.30749238	0.89115024	0.5548654	0.7565411	1.0	9967	tags=44%, list=34%, signal=67%
GO_CELLULAR_RESPONSE_TO_ESTROGEN_STIMULUS	GO_CELLULAR_RESPONSE_TO_ESTROGEN_STIMULUS		37	0.24655783	0.89017123	0.6492248	0.7576061	1.0	946	tags=11%, list=3%, signal=11%
GO_POLY_PURINE_TRACT_BINDING	GO_POLY_PURINE_TRACT_BINDING		18	0.3251145	0.8893349	0.5813953	0.75835425	1.0	3540	tags=22%, list=12%, signal=25%
GO_TRNA_BINDING	GO_TRNA_BINDING		43	0.2714939	0.8892778	0.5618661	0.75758517	1.0	5886	tags=26%, list=20%, signal=32%
GO_PYRIMIDINE_CONTAINING_COMPOUND_CATABOLIC_PROCESS	GO_PYRIMIDINE_CONTAINING_COMPOUND_CATABOLIC_PROCESS		29	0.2527	0.88813674	0.63190186	0.7589343	1.0	9258	tags=41%, list=31%, signal=60%
GO_PSEUDOURIDINE_SYNTHESIS	GO_PSEUDOURIDINE_SYNTHESIS		17	0.32514	0.88773614	0.5350701	0.7588332	1.0	9579	tags=47%, list=33%, signal=70%
GO_PROTEIN_POLYUBIQUITINATION	GO_PROTEIN_POLYUBIQUITINATION		235	0.20953384	0.8871757	0.61076605	0.7590553	1.0	5562	tags=20%, list=19%, signal=24%
GO_GAMMA_AMINOBUTYRIC_ACID_SIGNALING_PATHWAY	GO_GAMMA_AMINOBUTYRIC_ACID_SIGNALING_PATHWAY		21	0.28699064	0.88659763	0.6042885	0.75925744	1.0	10120	tags=38%, list=34%, signal=58%
GO_REGULATION_OF_APPETITE	GO_REGULATION_OF_APPETITE		19	0.29618427	0.88429654	0.62813103	0.76291424	1.0	6986	tags=32%, list=24%, signal=41%
GO_HISTONE_H2A_UBIQUITINATION	GO_HISTONE_H2A_UBIQUITINATION		16	0.32965764	0.881635	0.59	0.7673857	1.0	1306	tags=19%, list=4%, signal=20%
GO_NEGATIVE_REGULATION_OF_T_CELL_DIFFERENTIATION	GO_NEGATIVE_REGULATION_OF_T_CELL_DIFFERENTIATION		28	0.2628401	0.8805685	0.5808383	0.76866764	1.0	7748	tags=32%, list=26%, signal=44%
GO_INTESTINAL_ABSORPTION	GO_INTESTINAL_ABSORPTION		26	0.26609948	0.8799412	0.6481481	0.7690159	1.0	8932	tags=35%, list=30%, signal=50%
GO_OTIC_VESICLE_DEVELOPMENT	GO_OTIC_VESICLE_DEVELOPMENT		15	0.31418565	0.87971526	0.63244355	0.76859725	1.0	6926	tags=33%, list=24%, signal=44%
GO_PRODUCTION_OF_MOLECULAR_MEDIATOR_OF_IMMUNE_RESPONSE	GO_PRODUCTION_OF_MOLECULAR_MEDIATOR_OF_IMMUNE_RESPONSE		60	0.24237145	0.8786961	0.609127	0.7698095	1.0	5937	tags=25%, list=20%, signal=31%
GO_POSITIVE_REGULATION_OF_STRIATED_MUSCLE_CONTRACTION	GO_POSITIVE_REGULATION_OF_STRIATED_MUSCLE_CONTRACTION		15	0.2973021	0.87844616	0.62550604	0.76943827	1.0	5238	tags=33%, list=18%, signal=41%
GO_PROTEASOME_ACCESSORY_COMPLEX	GO_PROTEASOME_ACCESSORY_COMPLEX		24	0.3594001	0.878238	0.5893224	0.7689875	1.0	9696	tags=42%, list=33%, signal=62%
GO_REGULATION_OF_CELLULAR_AMIDE_METABOLIC_PROCESS	GO_REGULATION_OF_CELLULAR_AMIDE_METABOLIC_PROCESS		322	0.19594796	0.8773512	0.6336842	0.769871	1.0	4439	tags=16%, list=15%, signal=18%
GO_REGULATION_OF_MITOCHONDRION_ORGANIZATION	GO_REGULATION_OF_MITOCHONDRION_ORGANIZATION		198	0.19291805	0.8765052	0.67484665	0.7706226	1.0	3276	tags=13%, list=11%, signal=14%
GO_POSITIVE_REGULATION_OF_NEURAL_PRECURSOR_CELL_PROLIFERATION	GO_POSITIVE_REGULATION_OF_NEURAL_PRECURSOR_CELL_PROLIFERATION		39	0.2601371	0.87588114	0.65107214	0.77092695	1.0	3456	tags=18%, list=12%, signal=20%
GO_SIGNAL_SEQUENCE_BINDING	GO_SIGNAL_SEQUENCE_BINDING		37	0.26358184	0.8758058	0.58979595	0.77020633	1.0	5700	tags=22%, list=19%, signal=27%
GO_PROTEIN_IMPORT_INTO_NUCLEUS_TRANSLOCATION	GO_PROTEIN_IMPORT_INTO_NUCLEUS_TRANSLOCATION		27	0.26720193	0.8745974	0.6293279	0.7716969	1.0	11969	tags=48%, list=41%, signal=81%
GO_VENTRAL_SPINAL_CORD_DEVELOPMENT	GO_VENTRAL_SPINAL_CORD_DEVELOPMENT		44	0.26047364	0.8724474	0.64807695	0.77502656	1.0	10650	tags=43%, list=36%, signal=68%
GO_REGULATION_OF_TRANSLATIONAL_INITIATION	GO_REGULATION_OF_TRANSLATIONAL_INITIATION		78	0.24055542	0.87231374	0.6111111	0.7744096	1.0	6441	tags=21%, list=22%, signal=26%
GO_ANION_CHANNEL_ACTIVITY	GO_ANION_CHANNEL_ACTIVITY		83	0.2203359	0.8719278	0.6858847	0.77429473	1.0	1798	tags=10%, list=6%, signal=10%
GO_DETECTION_OF_STIMULUS	GO_DETECTION_OF_STIMULUS		230	0.18729141	0.8715434	0.7811321	0.774177	1.0	4500	tags=16%, list=15%, signal=18%
GO_RESPONSE_TO_ACETYLCHOLINE	GO_RESPONSE_TO_ACETYLCHOLINE		18	0.29043388	0.87028605	0.61454546	0.77575165	1.0	8422	tags=39%, list=29%, signal=54%
GO_STRUCTURAL_CONSTITUENT_OF_CYTOSKELETON	GO_STRUCTURAL_CONSTITUENT_OF_CYTOSKELETON		92	0.22567897	0.8697594	0.639604	0.7759685	1.0	1612	tags=9%, list=5%, signal=9%
GO_GABA_RECEPTOR_ACTIVITY	GO_GABA_RECEPTOR_ACTIVITY		20	0.29957798	0.8668526	0.63414633	0.7809026	1.0	8504	tags=40%, list=29%, signal=56%
GO_T_CELL_APOPTOTIC_PROCESS	GO_T_CELL_APOPTOTIC_PROCESS		15	0.30021545	0.8651798	0.6494024	0.7833205	1.0	2504	tags=13%, list=9%, signal=15%
GO_MODULATION_BY_SYMBIONT_OF_HOST_CELLULAR_PROCESS	GO_MODULATION_BY_SYMBIONT_OF_HOST_CELLULAR_PROCESS		28	0.25585946	0.86470294	0.6178862	0.7833502	1.0	2900	tags=18%, list=10%, signal=20%
GO_PORE_COMPLEX_ASSEMBLY	GO_PORE_COMPLEX_ASSEMBLY		15	0.33181128	0.8646161	0.5995976	0.7826523	1.0	857	tags=13%, list=3%, signal=14%
GO_NEGATIVE_REGULATION_OF_PROTEIN_BINDING	GO_NEGATIVE_REGULATION_OF_PROTEIN_BINDING		77	0.2112957	0.862942	0.6990476	0.7850891	1.0	7743	tags=27%, list=26%, signal=37%
GO_CEREBRAL_CORTEX_RADIALLY_ORIENTED_CELL_MIGRATION	GO_CEREBRAL_CORTEX_RADIALLY_ORIENTED_CELL_MIGRATION		27	0.2667572	0.86202854	0.64312977	0.7860221	1.0	4843	tags=26%, list=16%, signal=31%
GO_SPERM_FLAGELLUM	GO_SPERM_FLAGELLUM		46	0.22837898	0.8614018	0.69753087	0.7863563	1.0	934	tags=9%, list=3%, signal=9%
GO_POSITIVE_REGULATION_OF_INTERFERON_ALPHA_PRODUCTION	GO_POSITIVE_REGULATION_OF_INTERFERON_ALPHA_PRODUCTION		16	0.30731478	0.8577422	0.6374269	0.7927015	1.0	4087	tags=19%, list=14%, signal=22%
GO_REGULATION_OF_INTRINSIC_APOPTOTIC_SIGNALING_PATHWAY_BY_P53_CLASS_MEDIATOR	GO_REGULATION_OF_INTRINSIC_APOPTOTIC_SIGNALING_PATHWAY_BY_P53_CLASS_MEDIATOR		22	0.2652148	0.85699904	0.64091855	0.7932627	1.0	6200	tags=27%, list=21%, signal=35%
GO_NEUROPEPTIDE_SIGNALING_PATHWAY	GO_NEUROPEPTIDE_SIGNALING_PATHWAY		73	0.23448063	0.8558338	0.72529644	0.79461116	1.0	10076	tags=45%, list=34%, signal=69%
GO_SMOOTHENED_SIGNALING_PATHWAY	GO_SMOOTHENED_SIGNALING_PATHWAY		70	0.23529762	0.85520315	0.63708085	0.7949661	1.0	6396	tags=26%, list=22%, signal=33%
GO_RECEPTOR_ACTIVATOR_ACTIVITY	GO_RECEPTOR_ACTIVATOR_ACTIVITY		31	0.24781749	0.8551372	0.6979592	0.794214	1.0	5576	tags=23%, list=19%, signal=28%
GO_REGULATION_OF_INTERLEUKIN_2_BIOSYNTHETIC_PROCESS	GO_REGULATION_OF_INTERLEUKIN_2_BIOSYNTHETIC_PROCESS		17	0.33130768	0.85275155	0.6130952	0.79804254	1.0	2958	tags=18%, list=10%, signal=20%
GO_RNA_DEPENDENT_DNA_BIOSYNTHETIC_PROCESS	GO_RNA_DEPENDENT_DNA_BIOSYNTHETIC_PROCESS		21	0.27434286	0.85222524	0.6479167	0.7981877	1.0	2765	tags=14%, list=9%, signal=16%
GO_REGULATION_OF_ESTABLISHMENT_OF_PLANAR_POLARITY	GO_REGULATION_OF_ESTABLISHMENT_OF_PLANAR_POLARITY		109	0.2243882	0.8520515	0.6280992	0.79763174	1.0	8309	tags=23%, list=28%, signal=32%
GO_PROTEIN_IMPORT	GO_PROTEIN_IMPORT		150	0.2019003	0.85141164	0.6876268	0.7980035	1.0	7794	tags=25%, list=26%, signal=33%
GO_NEGATIVE_REGULATION_OF_VIRAL_TRANSCRIPTION	GO_NEGATIVE_REGULATION_OF_VIRAL_TRANSCRIPTION		24	0.26716343	0.8500798	0.6388889	0.799673	1.0	5390	tags=25%, list=18%, signal=31%
GO_REGULATION_OF_PROTEIN_SUMOYLATION	GO_REGULATION_OF_PROTEIN_SUMOYLATION		18	0.28388605	0.84954435	0.6325301	0.7998254	1.0	8269	tags=33%, list=28%, signal=46%
GO_CEREBRAL_CORTEX_DEVELOPMENT	GO_CEREBRAL_CORTEX_DEVELOPMENT		102	0.22092195	0.84787184	0.68199235	0.8022128	1.0	4843	tags=19%, list=16%, signal=22%
GO_INTRAMOLECULAR_TRANSFERASE_ACTIVITY	GO_INTRAMOLECULAR_TRANSFERASE_ACTIVITY		26	0.27457213	0.8475022	0.6301653	0.8020354	1.0	7937	tags=35%, list=27%, signal=47%
GO_POSITIVE_REGULATION_OF_NIK_NF_KAPPAB_SIGNALING	GO_POSITIVE_REGULATION_OF_NIK_NF_KAPPAB_SIGNALING		28	0.27093604	0.8473442	0.67474747	0.80146027	1.0	6199	tags=29%, list=21%, signal=36%
GO_REGULATION_OF_WATER_LOSS_VIA_SKIN	GO_REGULATION_OF_WATER_LOSS_VIA_SKIN		17	0.29460543	0.84659994	0.6659794	0.80205476	1.0	6568	tags=29%, list=22%, signal=38%
GO_RNA_CATABOLIC_PROCESS	GO_RNA_CATABOLIC_PROCESS		216	0.2538703	0.8455272	0.5805785	0.80322677	1.0	11246	tags=37%, list=38%, signal=59%
GO_EATING_BEHAVIOR	GO_EATING_BEHAVIOR		24	0.28228572	0.8428644	0.74455446	0.8075076	1.0	7891	tags=38%, list=27%, signal=51%
GO_PROTEIN_K48_LINKED_DEUBIQUITINATION	GO_PROTEIN_K48_LINKED_DEUBIQUITINATION		19	0.2957788	0.84256876	0.67729086	0.8071918	1.0	3567	tags=16%, list=12%, signal=18%
GO_SPINAL_CORD_DEVELOPMENT	GO_SPINAL_CORD_DEVELOPMENT		95	0.23050243	0.84160256	0.7137331	0.80824995	1.0	9253	tags=38%, list=31%, signal=55%
GO_NEGATIVE_REGULATION_OF_CELL_AGING	GO_NEGATIVE_REGULATION_OF_CELL_AGING		16	0.2961663	0.8407343	0.6640471	0.80903774	1.0	7496	tags=31%, list=25%, signal=42%
GO_GLYCOSYL_COMPOUND_CATABOLIC_PROCESS	GO_GLYCOSYL_COMPOUND_CATABOLIC_PROCESS		39	0.24494822	0.84059757	0.6987448	0.80841184	1.0	6527	tags=28%, list=22%, signal=36%
GO_NEUTRAL_AMINO_ACID_TRANSPORT	GO_NEUTRAL_AMINO_ACID_TRANSPORT		31	0.24634089	0.840307	0.7035573	0.80806565	1.0	7628	tags=29%, list=26%, signal=39%
GO_CILIARY_TRANSITION_ZONE	GO_CILIARY_TRANSITION_ZONE		23	0.2994004	0.84009814	0.64	0.8075827	1.0	9629	tags=39%, list=33%, signal=58%
GO_GLUCOSE_6_PHOSPHATE_METABOLIC_PROCESS	GO_GLUCOSE_6_PHOSPHATE_METABOLIC_PROCESS		21	0.27922612	0.8390482	0.64449066	0.8087754	1.0	10847	tags=57%, list=37%, signal=90%
GO_GLYCOSYL_COMPOUND_BIOSYNTHETIC_PROCESS	GO_GLYCOSYL_COMPOUND_BIOSYNTHETIC_PROCESS		111	0.21268734	0.83679366	0.6536965	0.8122286	1.0	6558	tags=24%, list=22%, signal=31%
GO_ACTIVATION_OF_JUN_KINASE_ACTIVITY	GO_ACTIVATION_OF_JUN_KINASE_ACTIVITY		32	0.24877276	0.83498377	0.6897233	0.8148675	1.0	9883	tags=41%, list=34%, signal=61%
GO_TELENCEPHALON_GLIAL_CELL_MIGRATION	GO_TELENCEPHALON_GLIAL_CELL_MIGRATION		18	0.27675948	0.83393157	0.6779661	0.8159993	1.0	4696	tags=28%, list=16%, signal=33%
GO_PROTEIN_LOCALIZATION_TO_GOLGI_APPARATUS	GO_PROTEIN_LOCALIZATION_TO_GOLGI_APPARATUS		29	0.26264843	0.8337192	0.6639676	0.8155485	1.0	4555	tags=21%, list=15%, signal=24%
GO_REGULATION_OF_NEUROBLAST_PROLIFERATION	GO_REGULATION_OF_NEUROBLAST_PROLIFERATION		27	0.27551687	0.8335364	0.6770428	0.8150203	1.0	4493	tags=22%, list=15%, signal=26%
GO_ACROSOMAL_MEMBRANE	GO_ACROSOMAL_MEMBRANE		18	0.27286756	0.83338434	0.68787277	0.814442	1.0	1420	tags=11%, list=5%, signal=12%
GO_RHO_GTPASE_BINDING	GO_RHO_GTPASE_BINDING		76	0.21866977	0.83092636	0.687251	0.818221	1.0	5347	tags=18%, list=18%, signal=22%
GO_CIS_TRANS_ISOMERASE_ACTIVITY	GO_CIS_TRANS_ISOMERASE_ACTIVITY		39	0.23826683	0.8302182	0.6487026	0.81867087	1.0	9678	tags=38%, list=33%, signal=57%
GO_EYE_PHOTORECEPTOR_CELL_DEVELOPMENT	GO_EYE_PHOTORECEPTOR_CELL_DEVELOPMENT		29	0.24445295	0.82968754	0.71031743	0.8187974	1.0	11139	tags=48%, list=38%, signal=78%
GO_PHOSPHATIDYLINOSITOL_4_5_BISPHOSPHATE_BINDING	GO_PHOSPHATIDYLINOSITOL_4_5_BISPHOSPHATE_BINDING		47	0.22992384	0.8281756	0.73137254	0.8207611	1.0	6878	tags=26%, list=23%, signal=33%
GO_CYSTEINE_TYPE_PEPTIDASE_ACTIVITY	GO_CYSTEINE_TYPE_PEPTIDASE_ACTIVITY		152	0.18855453	0.8259707	0.7444668	0.82396585	1.0	8249	tags=27%, list=28%, signal=37%
GO_O_METHYLTRANSFERASE_ACTIVITY	GO_O_METHYLTRANSFERASE_ACTIVITY		16	0.2843771	0.8235629	0.67932487	0.82766545	1.0	8962	tags=31%, list=30%, signal=45%
GO_POSITIVE_REGULATION_OF_PRODUCTION_OF_MOLECULAR_MEDIATOR_OF_IMMUNE_RESPONSE	GO_POSITIVE_REGULATION_OF_PRODUCTION_OF_MOLECULAR_MEDIATOR_OF_IMMUNE_RESPONSE		59	0.22494234	0.8233792	0.69709545	0.8271542	1.0	5937	tags=22%, list=20%, signal=28%
GO_TETRAHYDROFOLATE_METABOLIC_PROCESS	GO_TETRAHYDROFOLATE_METABOLIC_PROCESS		21	0.27531892	0.8220093	0.6666667	0.82890344	1.0	9817	tags=33%, list=33%, signal=50%
GO_OLIGOSACCHARIDE_LIPID_INTERMEDIATE_BIOSYNTHETIC_PROCESS	GO_OLIGOSACCHARIDE_LIPID_INTERMEDIATE_BIOSYNTHETIC_PROCESS		20	0.28817245	0.8217702	0.6776699	0.82849264	1.0	7266	tags=35%, list=25%, signal=46%
GO_TELOMERASE_HOLOENZYME_COMPLEX	GO_TELOMERASE_HOLOENZYME_COMPLEX		19	0.2972315	0.82122374	0.65368855	0.82866675	1.0	13506	tags=58%, list=46%, signal=107%
GO_ECTODERM_DEVELOPMENT	GO_ECTODERM_DEVELOPMENT		20	0.26483592	0.82000124	0.68662673	0.83010566	1.0	11100	tags=40%, list=38%, signal=64%
GO_NEGATIVE_REGULATION_OF_B_CELL_PROLIFERATION	GO_NEGATIVE_REGULATION_OF_B_CELL_PROLIFERATION		15	0.32880908	0.8196518	0.67287785	0.8298937	1.0	10	tags=7%, list=0%, signal=7%
GO_TRANSCRIPTION_COFACTOR_BINDING	GO_TRANSCRIPTION_COFACTOR_BINDING		24	0.2666758	0.81956375	0.6771037	0.8291632	1.0	7367	tags=29%, list=25%, signal=39%
GO_ANTERIOR_POSTERIOR_AXIS_SPECIFICATION	GO_ANTERIOR_POSTERIOR_AXIS_SPECIFICATION		45	0.22844538	0.8191663	0.70182556	0.8290163	1.0	6354	tags=24%, list=22%, signal=31%
GO_SNRNA_BINDING	GO_SNRNA_BINDING		33	0.25691786	0.8184297	0.67083335	0.8295393	1.0	3384	tags=18%, list=12%, signal=21%
GO_MULTI_ORGANISM_METABOLIC_PROCESS	GO_MULTI_ORGANISM_METABOLIC_PROCESS		136	0.29722026	0.817916	0.621118	0.82968074	1.0	11597	tags=38%, list=39%, signal=63%
GO_PROTEIN_KINASE_C_ACTIVITY	GO_PROTEIN_KINASE_C_ACTIVITY		16	0.29013228	0.81785136	0.69776875	0.8289217	1.0	7124	tags=38%, list=24%, signal=49%
GO_POSITIVE_REGULATION_OF_PROTEIN_CATABOLIC_PROCESS	GO_POSITIVE_REGULATION_OF_PROTEIN_CATABOLIC_PROCESS		254	0.18703224	0.81747305	0.7014614	0.82876104	1.0	5714	tags=19%, list=19%, signal=23%
GO_NUCLEOBASE_CONTAINING_COMPOUND_KINASE_ACTIVITY	GO_NUCLEOBASE_CONTAINING_COMPOUND_KINASE_ACTIVITY		46	0.21502528	0.8155196	0.7090909	0.83155787	1.0	2565	tags=13%, list=9%, signal=14%
GO_TRANSCRIPTION_COREPRESSOR_ACTIVITY	GO_TRANSCRIPTION_COREPRESSOR_ACTIVITY		208	0.18428813	0.8152718	0.7402344	0.8311596	1.0	4571	tags=17%, list=16%, signal=20%
GO_RESPONSE_TO_AMMONIUM_ION	GO_RESPONSE_TO_AMMONIUM_ION		48	0.23212047	0.8142717	0.744403	0.83217055	1.0	8422	tags=29%, list=29%, signal=41%
GO_INORGANIC_ANION_TRANSPORT	GO_INORGANIC_ANION_TRANSPORT		121	0.19305398	0.8137724	0.81620556	0.83222544	1.0	1998	tags=9%, list=7%, signal=10%
GO_DIGESTIVE_SYSTEM_PROCESS	GO_DIGESTIVE_SYSTEM_PROCESS		58	0.2088369	0.8122299	0.82092553	0.8342629	1.0	7897	tags=26%, list=27%, signal=35%
GO_GLUCOSE_CATABOLIC_PROCESS	GO_GLUCOSE_CATABOLIC_PROCESS		26	0.26588857	0.8114392	0.66015625	0.8348697	1.0	7094	tags=27%, list=24%, signal=35%
GO_DIGESTION	GO_DIGESTION		118	0.20141597	0.81061167	0.83832335	0.8355286	1.0	8932	tags=32%, list=30%, signal=46%
GO_PHOTORECEPTOR_INNER_SEGMENT	GO_PHOTORECEPTOR_INNER_SEGMENT		31	0.23655948	0.81037384	0.7322835	0.83508205	1.0	12125	tags=48%, list=41%, signal=82%
GO_UBIQUITIN_LIKE_PROTEIN_BINDING	GO_UBIQUITIN_LIKE_PROTEIN_BINDING		115	0.20144333	0.8083937	0.6979592	0.83792186	1.0	10251	tags=32%, list=35%, signal=49%
GO_FEMALE_SEX_DIFFERENTIATION	GO_FEMALE_SEX_DIFFERENTIATION		108	0.19835989	0.8068401	0.8117647	0.8399567	1.0	5625	tags=19%, list=19%, signal=23%
GO_TRNA_SPECIFIC_RIBONUCLEASE_ACTIVITY	GO_TRNA_SPECIFIC_RIBONUCLEASE_ACTIVITY		16	0.30331856	0.8062114	0.6633267	0.8402286	1.0	4078	tags=19%, list=14%, signal=22%
GO_UBIQUITIN_LIKE_PROTEIN_LIGASE_ACTIVITY	GO_UBIQUITIN_LIKE_PROTEIN_LIGASE_ACTIVITY		188	0.19529937	0.8058781	0.7098121	0.8399254	1.0	5390	tags=18%, list=18%, signal=22%
GO_DEVELOPMENT_OF_PRIMARY_SEXUAL_CHARACTERISTICS	GO_DEVELOPMENT_OF_PRIMARY_SEXUAL_CHARACTERISTICS		194	0.1800588	0.8019873	0.8292683	0.8462877	1.0	5666	tags=16%, list=19%, signal=20%
GO_DORSAL_VENTRAL_PATTERN_FORMATION	GO_DORSAL_VENTRAL_PATTERN_FORMATION		87	0.22174494	0.8019174	0.7669173	0.8455434	1.0	6396	tags=24%, list=22%, signal=31%
GO_REGULATION_OF_TRANSCRIPTION_FROM_RNA_POLYMERASE_I_PROMOTER	GO_REGULATION_OF_TRANSCRIPTION_FROM_RNA_POLYMERASE_I_PROMOTER		23	0.2582592	0.8018291	0.67928284	0.8448244	1.0	9878	tags=30%, list=34%, signal=46%
GO_MALE_GENITALIA_DEVELOPMENT	GO_MALE_GENITALIA_DEVELOPMENT		20	0.26460427	0.8012066	0.75445545	0.8450963	1.0	8915	tags=40%, list=30%, signal=57%
GO_PROTEIN_C_TERMINUS_BINDING	GO_PROTEIN_C_TERMINUS_BINDING		181	0.18228674	0.7977724	0.80527383	0.85047317	1.0	3620	tags=13%, list=12%, signal=15%
GO_SULFUR_COMPOUND_TRANSMEMBRANE_TRANSPORTER_ACTIVITY	GO_SULFUR_COMPOUND_TRANSMEMBRANE_TRANSPORTER_ACTIVITY		26	0.24057113	0.7944693	0.75578946	0.8557596	1.0	1998	tags=12%, list=7%, signal=12%
GO_BETA_CATENIN_DESTRUCTION_COMPLEX_DISASSEMBLY	GO_BETA_CATENIN_DESTRUCTION_COMPLEX_DISASSEMBLY		20	0.27107295	0.7935773	0.7131631	0.8564898	1.0	7496	tags=30%, list=25%, signal=40%
GO_SYNAPTIC_TRANSMISSION_GLUTAMATERGIC	GO_SYNAPTIC_TRANSMISSION_GLUTAMATERGIC		22	0.25027972	0.79259855	0.7626459	0.8573201	1.0	4313	tags=18%, list=15%, signal=21%
GO_ECTODERMAL_PLACODE_DEVELOPMENT	GO_ECTODERMAL_PLACODE_DEVELOPMENT		15	0.2849456	0.79222953	0.68008476	0.8570965	1.0	12514	tags=60%, list=43%, signal=104%
GO_LIGASE_ACTIVITY	GO_LIGASE_ACTIVITY		375	0.17862794	0.7921033	0.73956263	0.8564441	1.0	5601	tags=17%, list=19%, signal=21%
GO_IRE1_MEDIATED_UNFOLDED_PROTEIN_RESPONSE	GO_IRE1_MEDIATED_UNFOLDED_PROTEIN_RESPONSE		53	0.23192859	0.7920851	0.6815534	0.8555847	1.0	7129	tags=25%, list=24%, signal=32%
GO_NUCLEAR_TRANSCRIBED_MRNA_POLY_A_TAIL_SHORTENING	GO_NUCLEAR_TRANSCRIBED_MRNA_POLY_A_TAIL_SHORTENING		24	0.2705078	0.7919772	0.7002012	0.85489845	1.0	4428	tags=21%, list=15%, signal=25%
GO_WW_DOMAIN_BINDING	GO_WW_DOMAIN_BINDING		30	0.2502064	0.7919236	0.7692308	0.85409635	1.0	2273	tags=17%, list=8%, signal=18%
GO_RESPONSE_TO_EPIDERMAL_GROWTH_FACTOR	GO_RESPONSE_TO_EPIDERMAL_GROWTH_FACTOR		28	0.24847613	0.7912167	0.74693877	0.8544763	1.0	251	tags=7%, list=1%, signal=7%
GO_CALMODULIN_DEPENDENT_PROTEIN_KINASE_ACTIVITY	GO_CALMODULIN_DEPENDENT_PROTEIN_KINASE_ACTIVITY		28	0.23068203	0.79121214	0.7518797	0.8536049	1.0	10555	tags=39%, list=36%, signal=61%
GO_NONRIBOSOMAL_PEPTIDE_BIOSYNTHETIC_PROCESS	GO_NONRIBOSOMAL_PEPTIDE_BIOSYNTHETIC_PROCESS		17	0.27025494	0.7884484	0.74485594	0.8577414	1.0	3045	tags=18%, list=10%, signal=20%
GO_RNA_POLYMERASE_II_TRANSCRIPTION_COFACTOR_ACTIVITY	GO_RNA_POLYMERASE_II_TRANSCRIPTION_COFACTOR_ACTIVITY		88	0.20078765	0.7881235	0.7745098	0.85744137	1.0	7529	tags=30%, list=26%, signal=40%
GO_REGULATION_OF_DENDRITE_EXTENSION	GO_REGULATION_OF_DENDRITE_EXTENSION		18	0.2562707	0.78387463	0.7627451	0.8642925	1.0	8904	tags=39%, list=30%, signal=56%
GO_REGULATION_OF_HISTONE_DEACETYLATION	GO_REGULATION_OF_HISTONE_DEACETYLATION		23	0.24155276	0.78348297	0.7509881	0.86410546	1.0	5317	tags=22%, list=18%, signal=27%
GO_ISOMERASE_ACTIVITY	GO_ISOMERASE_ACTIVITY		145	0.18421881	0.78051925	0.78527606	0.8684869	1.0	7427	tags=23%, list=25%, signal=31%
GO_INTRACELLULAR_STEROID_HORMONE_RECEPTOR_SIGNALING_PATHWAY	GO_INTRACELLULAR_STEROID_HORMONE_RECEPTOR_SIGNALING_PATHWAY		66	0.20536245	0.7797978	0.76693225	0.8688563	1.0	5317	tags=17%, list=18%, signal=20%
GO_REGULATION_OF_NEURON_MIGRATION	GO_REGULATION_OF_NEURON_MIGRATION		25	0.261195	0.7774687	0.75932837	0.8720625	1.0	1808	tags=12%, list=6%, signal=13%
GO_SEGMENT_SPECIFICATION	GO_SEGMENT_SPECIFICATION		15	0.27290443	0.7770238	0.7581967	0.87196076	1.0	1964	tags=13%, list=7%, signal=14%
GO_MAMMARY_GLAND_LOBULE_DEVELOPMENT	GO_MAMMARY_GLAND_LOBULE_DEVELOPMENT		16	0.26813626	0.7769163	0.7956778	0.87124246	1.0	6870	tags=38%, list=23%, signal=49%
GO_UBIQUITIN_LIKE_PROTEIN_TRANSFERASE_ACTIVITY	GO_UBIQUITIN_LIKE_PROTEIN_TRANSFERASE_ACTIVITY		397	0.17443775	0.776067	0.78125	0.87183565	1.0	4700	tags=15%, list=16%, signal=18%
GO_RESPONSE_TO_ACTIVITY	GO_RESPONSE_TO_ACTIVITY		65	0.20647117	0.7760538	0.833002	0.8709687	1.0	5684	tags=20%, list=19%, signal=25%
GO_CYTOSKELETON_DEPENDENT_INTRACELLULAR_TRANSPORT	GO_CYTOSKELETON_DEPENDENT_INTRACELLULAR_TRANSPORT		109	0.19704504	0.77533644	0.74703556	0.8713554	1.0	1612	tags=9%, list=5%, signal=10%
GO_NUCLEOTIDE_BINDING_DOMAIN_LEUCINE_RICH_REPEAT_CONTAINING_RECEPTOR_SIGNALING_PATHWAY	GO_NUCLEOTIDE_BINDING_DOMAIN_LEUCINE_RICH_REPEAT_CONTAINING_RECEPTOR_SIGNALING_PATHWAY		27	0.23393312	0.7744562	0.76008064	0.8720643	1.0	7737	tags=30%, list=26%, signal=40%
GO_FOLIC_ACID_CONTAINING_COMPOUND_METABOLIC_PROCESS	GO_FOLIC_ACID_CONTAINING_COMPOUND_METABOLIC_PROCESS		29	0.24265787	0.77365977	0.7274549	0.8726571	1.0	3991	tags=14%, list=14%, signal=16%
GO_CYTOPLASMIC_MRNA_PROCESSING_BODY	GO_CYTOPLASMIC_MRNA_PROCESSING_BODY		63	0.19735049	0.7719284	0.79	0.8747511	1.0	11970	tags=41%, list=41%, signal=69%
GO_MODULATION_OF_TRANSCRIPTION_IN_OTHER_ORGANISM_INVOLVED_IN_SYMBIOTIC_INTERACTION	GO_MODULATION_OF_TRANSCRIPTION_IN_OTHER_ORGANISM_INVOLVED_IN_SYMBIOTIC_INTERACTION		22	0.2426325	0.76876	0.7563851	0.87937164	1.0	9025	tags=41%, list=31%, signal=59%
GO_SPINAL_CORD_PATTERNING	GO_SPINAL_CORD_PATTERNING		23	0.26038343	0.76825553	0.7899807	0.8793434	1.0	11359	tags=48%, list=39%, signal=78%
GO_NUCLEOSIDE_TRANSPORT	GO_NUCLEOSIDE_TRANSPORT		15	0.26795983	0.76741916	0.7630522	0.87991107	1.0	7454	tags=33%, list=25%, signal=45%
GO_T_CELL_DIFFERENTIATION_INVOLVED_IN_IMMUNE_RESPONSE	GO_T_CELL_DIFFERENTIATION_INVOLVED_IN_IMMUNE_RESPONSE		28	0.25031292	0.7650765	0.70801526	0.8830694	1.0	4087	tags=14%, list=14%, signal=17%
GO_RIBONUCLEOSIDE_CATABOLIC_PROCESS	GO_RIBONUCLEOSIDE_CATABOLIC_PROCESS		24	0.24002075	0.7642338	0.766129	0.88365334	1.0	6527	tags=29%, list=22%, signal=37%
GO_POSITIVE_REGULATION_OF_VIRAL_TRANSCRIPTION	GO_POSITIVE_REGULATION_OF_VIRAL_TRANSCRIPTION		35	0.22996897	0.7630061	0.7748918	0.8848562	1.0	9418	tags=37%, list=32%, signal=55%
GO_MITOCHONDRION_LOCALIZATION	GO_MITOCHONDRION_LOCALIZATION		34	0.21974799	0.7623079	0.82806325	0.8851681	1.0	2898	tags=15%, list=10%, signal=16%
GO_RETINA_LAYER_FORMATION	GO_RETINA_LAYER_FORMATION		22	0.26774493	0.7620592	0.78642714	0.88468784	1.0	1445	tags=9%, list=5%, signal=10%
GO_GENITALIA_DEVELOPMENT	GO_GENITALIA_DEVELOPMENT		41	0.21278235	0.7610781	0.8194444	0.8854343	1.0	10650	tags=39%, list=36%, signal=61%
GO_CYTOPLASMIC_SEQUESTERING_OF_PROTEIN	GO_CYTOPLASMIC_SEQUESTERING_OF_PROTEIN		40	0.21738897	0.76032674	0.7906504	0.88577753	1.0	2115	tags=8%, list=7%, signal=8%
GO_PROTEIN_PALMITOYLATION	GO_PROTEIN_PALMITOYLATION		23	0.23516731	0.7601253	0.80824745	0.88523644	1.0	5320	tags=26%, list=18%, signal=32%
GO_APOPTOTIC_SIGNALING_PATHWAY	GO_APOPTOTIC_SIGNALING_PATHWAY		282	0.15769489	0.75972843	0.91217566	0.8850277	1.0	4154	tags=12%, list=14%, signal=13%
GO_NEGATIVE_REGULATION_OF_TRANSCRIPTION_REGULATORY_REGION_DNA_BINDING	GO_NEGATIVE_REGULATION_OF_TRANSCRIPTION_REGULATORY_REGION_DNA_BINDING		16	0.2613206	0.757022	0.80626225	0.888703	1.0	10705	tags=56%, list=36%, signal=88%
GO_NEUROPILIN_BINDING	GO_NEUROPILIN_BINDING		15	0.2922423	0.75670284	0.7480159	0.88836	1.0	3851	tags=20%, list=13%, signal=23%
GO_GLUCOSYLTRANSFERASE_ACTIVITY	GO_GLUCOSYLTRANSFERASE_ACTIVITY		16	0.2527298	0.7557495	0.76008064	0.88906246	1.0	5214	tags=25%, list=18%, signal=30%
GO_LYMPHOCYTE_APOPTOTIC_PROCESS	GO_LYMPHOCYTE_APOPTOTIC_PROCESS		18	0.24670422	0.75489485	0.7920792	0.8895236	1.0	2504	tags=11%, list=9%, signal=12%
GO_NEGATIVE_REGULATION_OF_LYASE_ACTIVITY	GO_NEGATIVE_REGULATION_OF_LYASE_ACTIVITY		25	0.23953411	0.7526662	0.8502879	0.89234483	1.0	3541	tags=20%, list=12%, signal=23%
GO_GLUTAMATE_SECRETION	GO_GLUTAMATE_SECRETION		28	0.22871833	0.7514753	0.8203125	0.89346397	1.0	7372	tags=32%, list=25%, signal=43%
GO_RESPONSE_TO_AUDITORY_STIMULUS	GO_RESPONSE_TO_AUDITORY_STIMULUS		23	0.2344499	0.7497684	0.8794179	0.89536864	1.0	7300	tags=26%, list=25%, signal=35%
GO_MAINTENANCE_OF_PROTEIN_LOCALIZATION_IN_ORGANELLE	GO_MAINTENANCE_OF_PROTEIN_LOCALIZATION_IN_ORGANELLE		29	0.21667457	0.7497112	0.80943024	0.8945804	1.0	1420	tags=7%, list=5%, signal=7%
GO_MEDIATOR_COMPLEX	GO_MEDIATOR_COMPLEX		34	0.2169379	0.74895525	0.785567	0.8949784	1.0	8067	tags=32%, list=27%, signal=45%
GO_SEGMENTATION	GO_SEGMENTATION		83	0.19593962	0.7455002	0.8036072	0.8996438	1.0	7643	tags=27%, list=26%, signal=36%
GO_REGULATION_OF_DNA_TEMPLATED_TRANSCRIPTION_INITIATION	GO_REGULATION_OF_DNA_TEMPLATED_TRANSCRIPTION_INITIATION		31	0.22011617	0.7444945	0.7973231	0.9003968	1.0	8309	tags=29%, list=28%, signal=40%
GO_NEUROTRANSMITTER_RECEPTOR_ACTIVITY	GO_NEUROTRANSMITTER_RECEPTOR_ACTIVITY		59	0.20742834	0.7440484	0.87360597	0.90018535	1.0	7602	tags=27%, list=26%, signal=36%
GO_TUBE_FORMATION	GO_TUBE_FORMATION		126	0.19248715	0.7435772	0.7836257	0.9000494	1.0	5483	tags=19%, list=19%, signal=23%
GO_FEAR_RESPONSE	GO_FEAR_RESPONSE		27	0.22462422	0.7425241	0.87283236	0.90080786	1.0	3338	tags=15%, list=11%, signal=17%
GO_PREASSEMBLY_OF_GPI_ANCHOR_IN_ER_MEMBRANE	GO_PREASSEMBLY_OF_GPI_ANCHOR_IN_ER_MEMBRANE		15	0.26972198	0.7422259	0.74530274	0.900407	1.0	8638	tags=33%, list=29%, signal=47%
GO_RECEPTOR_REGULATOR_ACTIVITY	GO_RECEPTOR_REGULATOR_ACTIVITY		43	0.19771896	0.7414097	0.9246436	0.900868	1.0	5576	tags=19%, list=19%, signal=23%
GO_ORGANIC_CYCLIC_COMPOUND_CATABOLIC_PROCESS	GO_ORGANIC_CYCLIC_COMPOUND_CATABOLIC_PROCESS		409	0.17403	0.740004	0.768	0.9022093	1.0	5937	tags=18%, list=20%, signal=22%
GO_RNA_POLYMERASE_CORE_ENZYME_BINDING	GO_RNA_POLYMERASE_CORE_ENZYME_BINDING		19	0.25170442	0.7392192	0.7582645	0.9025641	1.0	10526	tags=37%, list=36%, signal=57%
GO_PEROXISOME_PROLIFERATOR_ACTIVATED_RECEPTOR_BINDING	GO_PEROXISOME_PROLIFERATOR_ACTIVATED_RECEPTOR_BINDING		15	0.26428333	0.7391752	0.7613412	0.90173846	1.0	9907	tags=47%, list=34%, signal=70%
GO_QUATERNARY_AMMONIUM_GROUP_TRANSPORT	GO_QUATERNARY_AMMONIUM_GROUP_TRANSPORT		18	0.26760083	0.7389737	0.7740586	0.9011474	1.0	1551	tags=11%, list=5%, signal=12%
GO_SENSORY_PERCEPTION_OF_CHEMICAL_STIMULUS	GO_SENSORY_PERCEPTION_OF_CHEMICAL_STIMULUS		86	0.18943474	0.73815805	0.91590494	0.9015611	1.0	11334	tags=43%, list=39%, signal=70%
GO_SEX_DIFFERENTIATION	GO_SEX_DIFFERENTIATION		241	0.16514355	0.7380705	0.9236948	0.9008252	1.0	4046	tags=12%, list=14%, signal=13%
GO_SYNAPTIC_VESICLE_ENDOCYTOSIS	GO_SYNAPTIC_VESICLE_ENDOCYTOSIS		17	0.24463917	0.73713374	0.83064514	0.9014298	1.0	4945	tags=24%, list=17%, signal=28%
GO_PROTEIN_KINASE_COMPLEX	GO_PROTEIN_KINASE_COMPLEX		88	0.18181375	0.73351717	0.83613443	0.9062482	1.0	6725	tags=20%, list=23%, signal=26%
GO_AMMONIUM_TRANSMEMBRANE_TRANSPORT	GO_AMMONIUM_TRANSMEMBRANE_TRANSPORT		24	0.23535246	0.73266	0.81891346	0.90671426	1.0	9029	tags=33%, list=31%, signal=48%
GO_GUANOSINE_CONTAINING_COMPOUND_BIOSYNTHETIC_PROCESS	GO_GUANOSINE_CONTAINING_COMPOUND_BIOSYNTHETIC_PROCESS		15	0.28334558	0.7301302	0.74343437	0.9097721	1.0	6527	tags=40%, list=22%, signal=51%
GO_NONMOTILE_PRIMARY_CILIUM	GO_NONMOTILE_PRIMARY_CILIUM		118	0.17726383	0.7269517	0.8815261	0.9137025	1.0	4832	tags=14%, list=16%, signal=16%
GO_PROTEIN_TYROSINE_PHOSPHATASE_ACTIVITY	GO_PROTEIN_TYROSINE_PHOSPHATASE_ACTIVITY		97	0.17499413	0.7263106	0.9023941	0.9137429	1.0	3285	tags=12%, list=11%, signal=14%
GO_REGULATION_OF_DNA_DAMAGE_RESPONSE_SIGNAL_TRANSDUCTION_BY_P53_CLASS_MEDIATOR	GO_REGULATION_OF_DNA_DAMAGE_RESPONSE_SIGNAL_TRANSDUCTION_BY_P53_CLASS_MEDIATOR		27	0.22979388	0.7256884	0.8314176	0.91375184	1.0	664	tags=7%, list=2%, signal=8%
GO_RESPONSE_TO_LEAD_ION	GO_RESPONSE_TO_LEAD_ION		19	0.24286824	0.7247963	0.8414873	0.91419476	1.0	5828	tags=26%, list=20%, signal=33%
GO_NUCLEOTIDE_TRANSPORT	GO_NUCLEOTIDE_TRANSPORT		24	0.2245824	0.7247341	0.83203125	0.9133964	1.0	2318	tags=13%, list=8%, signal=14%
GO_RNA_POLYMERASE_II_CORE_BINDING	GO_RNA_POLYMERASE_II_CORE_BINDING		15	0.26189274	0.7236893	0.75396824	0.9141128	1.0	10526	tags=40%, list=36%, signal=62%
GO_ACID_AMINO_ACID_LIGASE_ACTIVITY	GO_ACID_AMINO_ACID_LIGASE_ACTIVITY		18	0.23876873	0.7203582	0.82902586	0.91811407	1.0	5229	tags=17%, list=18%, signal=20%
GO_PROTEIN_TETRAMERIZATION	GO_PROTEIN_TETRAMERIZATION		125	0.16756955	0.71701175	0.8997996	0.9220243	1.0	6527	tags=20%, list=22%, signal=26%
GO_RECEPTOR_AGONIST_ACTIVITY	GO_RECEPTOR_AGONIST_ACTIVITY		15	0.25772098	0.7154808	0.8796844	0.9233433	1.0	9575	tags=47%, list=33%, signal=69%
GO_STARTLE_RESPONSE	GO_STARTLE_RESPONSE		23	0.2522241	0.71405715	0.90674603	0.92441833	1.0	10475	tags=48%, list=36%, signal=74%
GO_INTRINSIC_COMPONENT_OF_MITOCHONDRIAL_OUTER_MEMBRANE	GO_INTRINSIC_COMPONENT_OF_MITOCHONDRIAL_OUTER_MEMBRANE		21	0.22958383	0.70843875	0.832998	0.9314519	1.0	8920	tags=38%, list=30%, signal=55%
GO_MATING_BEHAVIOR	GO_MATING_BEHAVIOR		21	0.22877699	0.70795417	0.85714287	0.9312106	1.0	8501	tags=33%, list=29%, signal=47%
GO_VITAMIN_D_RECEPTOR_BINDING	GO_VITAMIN_D_RECEPTOR_BINDING		17	0.25349802	0.70662576	0.7656566	0.93220544	1.0	12080	tags=53%, list=41%, signal=90%
GO_LOW_DENSITY_LIPOPROTEIN_PARTICLE_RECEPTOR_BINDING	GO_LOW_DENSITY_LIPOPROTEIN_PARTICLE_RECEPTOR_BINDING		17	0.24413237	0.7059546	0.8250497	0.9322719	1.0	1378	tags=12%, list=5%, signal=12%
GO_NUCLEOSIDE_MONOPHOSPHATE_BIOSYNTHETIC_PROCESS	GO_NUCLEOSIDE_MONOPHOSPHATE_BIOSYNTHETIC_PROCESS		79	0.19402556	0.70312107	0.8370221	0.9352274	1.0	6558	tags=22%, list=22%, signal=28%
GO_RRNA_METHYLTRANSFERASE_ACTIVITY	GO_RRNA_METHYLTRANSFERASE_ACTIVITY		15	0.25468555	0.70291716	0.81458336	0.9346141	1.0	7434	tags=33%, list=25%, signal=45%
GO_NEGATIVE_REGULATION_OF_LYMPHOCYTE_APOPTOTIC_PROCESS	GO_NEGATIVE_REGULATION_OF_LYMPHOCYTE_APOPTOTIC_PROCESS		26	0.2259309	0.701943	0.7962578	0.93506956	1.0	9848	tags=31%, list=33%, signal=46%
GO_CIRCADIAN_REGULATION_OF_GENE_EXPRESSION	GO_CIRCADIAN_REGULATION_OF_GENE_EXPRESSION		51	0.1989609	0.7017872	0.86417323	0.9343868	1.0	3862	tags=16%, list=13%, signal=18%
GO_REGULATION_OF_CHROMATIN_BINDING	GO_REGULATION_OF_CHROMATIN_BINDING		16	0.24317753	0.70124686	0.82514733	0.93424416	1.0	7221	tags=31%, list=25%, signal=41%
GO_REGULATION_OF_INTRACELLULAR_ESTROGEN_RECEPTOR_SIGNALING_PATHWAY	GO_REGULATION_OF_INTRACELLULAR_ESTROGEN_RECEPTOR_SIGNALING_PATHWAY		26	0.21541843	0.69324005	0.88508064	0.9440416	1.0	4533	tags=15%, list=15%, signal=18%
GO_REGULATION_OF_BEHAVIOR	GO_REGULATION_OF_BEHAVIOR		55	0.19480693	0.6923524	0.9375	0.94428766	1.0	8877	tags=31%, list=30%, signal=44%
GO_METENCEPHALON_DEVELOPMENT	GO_METENCEPHALON_DEVELOPMENT		97	0.17745402	0.69127095	0.96240604	0.94476366	1.0	9821	tags=32%, list=33%, signal=48%
GO_ESTABLISHMENT_OF_LOCALIZATION_BY_MOVEMENT_ALONG_MICROTUBULE	GO_ESTABLISHMENT_OF_LOCALIZATION_BY_MOVEMENT_ALONG_MICROTUBULE		90	0.1781166	0.6909389	0.8647541	0.94431216	1.0	6407	tags=19%, list=22%, signal=24%
GO_DEMETHYLATION	GO_DEMETHYLATION		51	0.1924725	0.6892953	0.8559671	0.9455338	1.0	9258	tags=29%, list=31%, signal=43%
GO_S_ADENOSYLMETHIONINE_METABOLIC_PROCESS	GO_S_ADENOSYLMETHIONINE_METABOLIC_PROCESS		18	0.24077876	0.68881595	0.82912624	0.94524074	1.0	511	tags=6%, list=2%, signal=6%
GO_COENZYME_A_METABOLIC_PROCESS	GO_COENZYME_A_METABOLIC_PROCESS		17	0.26173234	0.6878254	0.82388663	0.9456159	1.0	8285	tags=41%, list=28%, signal=57%
GO_L_AMINO_ACID_TRANSMEMBRANE_TRANSPORTER_ACTIVITY	GO_L_AMINO_ACID_TRANSMEMBRANE_TRANSPORTER_ACTIVITY		50	0.19099893	0.68703467	0.9001883	0.9457431	1.0	8515	tags=28%, list=29%, signal=39%
GO_LYMPHOCYTE_ACTIVATION_INVOLVED_IN_IMMUNE_RESPONSE	GO_LYMPHOCYTE_ACTIVATION_INVOLVED_IN_IMMUNE_RESPONSE		79	0.1943513	0.6846548	0.8276553	0.94783413	1.0	4127	tags=13%, list=14%, signal=15%
GO_INTRACELLULAR_LIPID_TRANSPORT	GO_INTRACELLULAR_LIPID_TRANSPORT		20	0.22958457	0.68124807	0.84458077	0.9511222	1.0	2523	tags=15%, list=9%, signal=16%
GO_REGULATION_OF_CATENIN_IMPORT_INTO_NUCLEUS	GO_REGULATION_OF_CATENIN_IMPORT_INTO_NUCLEUS		27	0.2250971	0.6804299	0.82191783	0.95121735	1.0	6002	tags=26%, list=20%, signal=33%
GO_HYDROLASE_ACTIVITY_HYDROLYZING_O_GLYCOSYL_COMPOUNDS	GO_HYDROLASE_ACTIVITY_HYDROLYZING_O_GLYCOSYL_COMPOUNDS		83	0.17572716	0.6803534	0.94368935	0.95042473	1.0	11313	tags=35%, list=38%, signal=57%
GO_POSITIVE_REGULATION_OF_TYPE_I_INTERFERON_PRODUCTION	GO_POSITIVE_REGULATION_OF_TYPE_I_INTERFERON_PRODUCTION		70	0.17376608	0.67546296	0.90873784	0.9554855	1.0	9383	tags=27%, list=32%, signal=40%
GO_BASAL_TRANSCRIPTION_MACHINERY_BINDING	GO_BASAL_TRANSCRIPTION_MACHINERY_BINDING		23	0.21988286	0.6739154	0.8450704	0.95640814	1.0	10526	tags=43%, list=36%, signal=68%
GO_DOUBLE_STRANDED_RNA_BINDING	GO_DOUBLE_STRANDED_RNA_BINDING		59	0.18770483	0.6715798	0.8614458	0.95823014	1.0	2064	tags=10%, list=7%, signal=11%
GO_NEUROTRANSMITTER_TRANSPORTER_ACTIVITY	GO_NEUROTRANSMITTER_TRANSPORTER_ACTIVITY		24	0.21801694	0.670584	0.9244186	0.958485	1.0	8112	tags=29%, list=28%, signal=40%
GO_INNER_EAR_RECEPTOR_CELL_DEVELOPMENT	GO_INNER_EAR_RECEPTOR_CELL_DEVELOPMENT		34	0.1924839	0.6672157	0.94011974	0.96143514	1.0	3182	tags=12%, list=11%, signal=13%
GO_PHOTORECEPTOR_CELL_DIFFERENTIATION	GO_PHOTORECEPTOR_CELL_DIFFERENTIATION		48	0.17977795	0.6666133	0.94653463	0.96120346	1.0	9519	tags=35%, list=32%, signal=52%
GO_RNA_POLYMERASE_BINDING	GO_RNA_POLYMERASE_BINDING		32	0.19866413	0.66650575	0.8863636	0.9604313	1.0	11114	tags=41%, list=38%, signal=65%
GO_NEGATIVE_REGULATION_OF_GENE_SILENCING	GO_NEGATIVE_REGULATION_OF_GENE_SILENCING		17	0.22287482	0.6659708	0.8816326	0.96014464	1.0	10164	tags=35%, list=35%, signal=54%
GO_CARBOHYDRATE_DERIVATIVE_TRANSPORT	GO_CARBOHYDRATE_DERIVATIVE_TRANSPORT		48	0.1782546	0.6643471	0.91617936	0.96108836	1.0	6736	tags=23%, list=23%, signal=30%
GO_FOLIC_ACID_METABOLIC_PROCESS	GO_FOLIC_ACID_METABOLIC_PROCESS		18	0.21781318	0.66272795	0.87090164	0.9619522	1.0	3991	tags=17%, list=14%, signal=19%
GO_EXTRACELLULAR_LIGAND_GATED_ION_CHANNEL_ACTIVITY	GO_EXTRACELLULAR_LIGAND_GATED_ION_CHANNEL_ACTIVITY		68	0.17582941	0.65986806	0.96303505	0.9641356	1.0	5405	tags=18%, list=18%, signal=22%
GO_PHOTORECEPTOR_OUTER_SEGMENT	GO_PHOTORECEPTOR_OUTER_SEGMENT		58	0.17031021	0.65756696	0.95669293	0.96574265	1.0	2815	tags=9%, list=10%, signal=10%
GO_CYTOPLASMIC_PATTERN_RECOGNITION_RECEPTOR_SIGNALING_PATHWAY	GO_CYTOPLASMIC_PATTERN_RECOGNITION_RECEPTOR_SIGNALING_PATHWAY		32	0.19253866	0.6554535	0.9199179	0.96707034	1.0	7737	tags=25%, list=26%, signal=34%
GO_REGULATION_OF_GLUCONEOGENESIS	GO_REGULATION_OF_GLUCONEOGENESIS		33	0.1957125	0.651284	0.93018866	0.9705391	1.0	7961	tags=27%, list=27%, signal=37%
GO_MONOAMINE_TRANSPORT	GO_MONOAMINE_TRANSPORT		22	0.20950942	0.64579636	0.94020617	0.9752441	1.0	11119	tags=41%, list=38%, signal=66%
GO_ANTIGEN_PROCESSING_AND_PRESENTATION_OF_PEPTIDE_ANTIGEN	GO_ANTIGEN_PROCESSING_AND_PRESENTATION_OF_PEPTIDE_ANTIGEN		168	0.1798189	0.64579237	0.84166664	0.97433436	1.0	634	tags=5%, list=2%, signal=5%
GO_ARACHIDONIC_ACID_MONOOXYGENASE_ACTIVITY	GO_ARACHIDONIC_ACID_MONOOXYGENASE_ACTIVITY		15	0.28171352	0.6455509	0.8003992	0.9736525	1.0	5567	tags=27%, list=19%, signal=33%
GO_CLATHRIN_ADAPTOR_COMPLEX	GO_CLATHRIN_ADAPTOR_COMPLEX		27	0.19673757	0.64477795	0.89534885	0.97351503	1.0	7915	tags=26%, list=27%, signal=35%
GO_REGULATION_OF_INTERFERON_ALPHA_PRODUCTION	GO_REGULATION_OF_INTERFERON_ALPHA_PRODUCTION		19	0.22678262	0.6404657	0.8715953	0.9766689	1.0	4087	tags=16%, list=14%, signal=18%
GO_AMINO_ACID_TRANSMEMBRANE_TRANSPORT	GO_AMINO_ACID_TRANSMEMBRANE_TRANSPORT		63	0.16772012	0.6400829	0.9785156	0.9761124	1.0	8515	tags=27%, list=29%, signal=38%
GO_NUCLEOTIDE_TRANSMEMBRANE_TRANSPORTER_ACTIVITY	GO_NUCLEOTIDE_TRANSMEMBRANE_TRANSPORTER_ACTIVITY		19	0.21117923	0.6392545	0.904943	0.97600305	1.0	9424	tags=37%, list=32%, signal=54%
GO_NEURON_FATE_SPECIFICATION	GO_NEURON_FATE_SPECIFICATION		29	0.21866202	0.6379522	0.936803	0.97632354	1.0	10246	tags=41%, list=35%, signal=63%
GO_MATURATION_OF_SSU_RRNA_FROM_TRICISTRONIC_RRNA_TRANSCRIPT_SSU_RRNA_5_8S_RRNA_LSU_RRNA_	GO_MATURATION_OF_SSU_RRNA_FROM_TRICISTRONIC_RRNA_TRANSCRIPT_SSU_RRNA_5_8S_RRNA_LSU_RRNA_		33	0.23114127	0.63643044	0.8313253	0.9768354	1.0	2438	tags=9%, list=8%, signal=10%
GO_HYDROLASE_ACTIVITY_ACTING_ON_CARBON_NITROGEN_BUT_NOT_PEPTIDE_BONDS_IN_CYCLIC_AMIDINES	GO_HYDROLASE_ACTIVITY_ACTING_ON_CARBON_NITROGEN_BUT_NOT_PEPTIDE_BONDS_IN_CYCLIC_AMIDINES		32	0.20047319	0.6361298	0.91497976	0.9762122	1.0	6417	tags=22%, list=22%, signal=28%
GO_RRNA_METHYLATION	GO_RRNA_METHYLATION		19	0.22156267	0.6330535	0.8798371	0.9781513	1.0	7947	tags=32%, list=27%, signal=43%
GO_RESPONSE_TO_IMMOBILIZATION_STRESS	GO_RESPONSE_TO_IMMOBILIZATION_STRESS		22	0.19995143	0.63245463	0.95652175	0.9777971	1.0	7891	tags=27%, list=27%, signal=37%
GO_RESPONSE_TO_SALT	GO_RESPONSE_TO_SALT		16	0.22980222	0.6318821	0.9313725	0.9773833	1.0	5387	tags=19%, list=18%, signal=23%
GO_MATURATION_OF_SSU_RRNA	GO_MATURATION_OF_SSU_RRNA		40	0.22179331	0.6313174	0.82258064	0.9770058	1.0	4857	tags=13%, list=17%, signal=15%
GO_PROXIMAL_DISTAL_PATTERN_FORMATION	GO_PROXIMAL_DISTAL_PATTERN_FORMATION		31	0.21302564	0.6304672	0.9288462	0.97687155	1.0	10572	tags=45%, list=36%, signal=70%
GO_AMPA_GLUTAMATE_RECEPTOR_COMPLEX	GO_AMPA_GLUTAMATE_RECEPTOR_COMPLEX		21	0.22052108	0.62775445	0.9055877	0.97838205	1.0	1601	tags=10%, list=5%, signal=10%
GO_IMMUNOGLOBULIN_RECEPTOR_BINDING	GO_IMMUNOGLOBULIN_RECEPTOR_BINDING		24	0.26320666	0.62348104	0.82703775	0.9811408	1.0	10111	tags=42%, list=34%, signal=63%
GO_CUL3_RING_UBIQUITIN_LIGASE_COMPLEX	GO_CUL3_RING_UBIQUITIN_LIGASE_COMPLEX		58	0.16363351	0.62251747	0.9544592	0.9810284	1.0	4083	tags=12%, list=14%, signal=14%
GO_PITUITARY_GLAND_DEVELOPMENT	GO_PITUITARY_GLAND_DEVELOPMENT		38	0.18859486	0.6214712	0.9685658	0.98099107	1.0	6447	tags=26%, list=22%, signal=34%
GO_RIBONUCLEOPROTEIN_COMPLEX_BINDING	GO_RIBONUCLEOPROTEIN_COMPLEX_BINDING		90	0.16794828	0.6210433	0.91511387	0.98042023	1.0	9978	tags=33%, list=34%, signal=50%
GO_NEGATIVE_REGULATION_OF_FATTY_ACID_METABOLIC_PROCESS	GO_NEGATIVE_REGULATION_OF_FATTY_ACID_METABOLIC_PROCESS		29	0.20438826	0.6209312	0.8869396	0.97961104	1.0	2250	tags=7%, list=8%, signal=7%
GO_EMBRYONIC_AXIS_SPECIFICATION	GO_EMBRYONIC_AXIS_SPECIFICATION		32	0.19049561	0.6207985	0.95490193	0.97881883	1.0	1571	tags=9%, list=5%, signal=10%
GO_DETECTION_OF_VISIBLE_LIGHT	GO_DETECTION_OF_VISIBLE_LIGHT		36	0.177091	0.6196119	0.98210734	0.9788895	1.0	11605	tags=44%, list=39%, signal=73%
GO_POSITIVE_REGULATION_OF_LAMELLIPODIUM_ASSEMBLY	GO_POSITIVE_REGULATION_OF_LAMELLIPODIUM_ASSEMBLY		15	0.23347943	0.6176679	0.9269777	0.97955096	1.0	8169	tags=27%, list=28%, signal=37%
GO_HEXOSE_CATABOLIC_PROCESS	GO_HEXOSE_CATABOLIC_PROCESS		45	0.17155677	0.6162021	0.94331986	0.9798548	1.0	8885	tags=29%, list=30%, signal=41%
GO_NUCLEAR_CYCLIN_DEPENDENT_PROTEIN_KINASE_HOLOENZYME_COMPLEX	GO_NUCLEAR_CYCLIN_DEPENDENT_PROTEIN_KINASE_HOLOENZYME_COMPLEX		15	0.21773325	0.61472434	0.9044586	0.98016185	1.0	7586	tags=27%, list=26%, signal=36%
GO_POLYUBIQUITIN_BINDING	GO_POLYUBIQUITIN_BINDING		40	0.17874548	0.6097213	0.94736844	0.9831473	1.0	5350	tags=15%, list=18%, signal=18%
GO_NEGATIVE_REGULATION_OF_HEMATOPOIETIC_PROGENITOR_CELL_DIFFERENTIATION	GO_NEGATIVE_REGULATION_OF_HEMATOPOIETIC_PROGENITOR_CELL_DIFFERENTIATION		20	0.21161498	0.6061524	0.87626773	0.9848954	1.0	5132	tags=15%, list=17%, signal=18%
GO_INNERVATION	GO_INNERVATION		23	0.2160592	0.6047234	0.9377432	0.9850462	1.0	4533	tags=17%, list=15%, signal=21%
GO_INTRAMOLECULAR_OXIDOREDUCTASE_ACTIVITY	GO_INTRAMOLECULAR_OXIDOREDUCTASE_ACTIVITY		50	0.16695108	0.6041626	0.9581673	0.98457986	1.0	6849	tags=20%, list=23%, signal=26%
GO_RIBOSOMAL_SMALL_SUBUNIT_BIOGENESIS	GO_RIBOSOMAL_SMALL_SUBUNIT_BIOGENESIS		55	0.21205366	0.6028745	0.81653225	0.9845624	1.0	12417	tags=38%, list=42%, signal=66%
GO_KERATINIZATION	GO_KERATINIZATION		29	0.21425743	0.5987941	0.9148515	0.98655325	1.0	8253	tags=28%, list=28%, signal=38%
GO_RESPONSE_TO_PROTOZOAN	GO_RESPONSE_TO_PROTOZOAN		19	0.22701637	0.5968697	0.91358024	0.98697937	1.0	2521	tags=11%, list=9%, signal=12%
GO_PROTEIN_KINASE_C_ACTIVATING_G_PROTEIN_COUPLED_RECEPTOR_SIGNALING_PATHWAY	GO_PROTEIN_KINASE_C_ACTIVATING_G_PROTEIN_COUPLED_RECEPTOR_SIGNALING_PATHWAY		30	0.1859563	0.59647775	0.97633135	0.98633957	1.0	7124	tags=27%, list=24%, signal=35%
GO_DEMETHYLASE_ACTIVITY	GO_DEMETHYLASE_ACTIVITY		32	0.18951209	0.59500664	0.92047715	0.98643774	1.0	8415	tags=25%, list=29%, signal=35%
GO_AMMONIUM_TRANSMEMBRANE_TRANSPORTER_ACTIVITY	GO_AMMONIUM_TRANSMEMBRANE_TRANSPORTER_ACTIVITY		26	0.18283051	0.59181255	0.976	0.9876386	1.0	108	tags=4%, list=0%, signal=4%
GO_CYTOPLASMIC_STRESS_GRANULE	GO_CYTOPLASMIC_STRESS_GRANULE		31	0.20069711	0.5916271	0.90983605	0.9868591	1.0	4439	tags=16%, list=15%, signal=19%
GO_IMMUNOGLOBULIN_COMPLEX	GO_IMMUNOGLOBULIN_COMPLEX		23	0.26416472	0.590907	0.84691846	0.9864127	1.0	10111	tags=43%, list=34%, signal=66%
GO_MONOSACCHARIDE_CATABOLIC_PROCESS	GO_MONOSACCHARIDE_CATABOLIC_PROCESS		54	0.16230398	0.58990866	0.94057375	0.9861989	1.0	11704	tags=41%, list=40%, signal=68%
GO_PROTEASOME_BINDING	GO_PROTEASOME_BINDING		16	0.21265699	0.57667565	0.9265306	0.9933423	1.0	6751	tags=25%, list=23%, signal=32%
GO_ONE_CARBON_METABOLIC_PROCESS	GO_ONE_CARBON_METABOLIC_PROCESS		36	0.17044213	0.57440543	0.96792454	0.99373436	1.0	5665	tags=14%, list=19%, signal=17%
GO_PROTEIN_HOMOTRIMERIZATION	GO_PROTEIN_HOMOTRIMERIZATION		19	0.17960934	0.57340777	0.98128897	0.99341106	1.0	4984	tags=16%, list=17%, signal=19%
GO_O_GLYCAN_PROCESSING	GO_O_GLYCAN_PROCESSING		55	0.17601594	0.5725011	0.97160244	0.9930095	1.0	4090	tags=13%, list=14%, signal=15%
GO_RNA_POLYMERASE_II_ACTIVATING_TRANSCRIPTION_FACTOR_BINDING	GO_RNA_POLYMERASE_II_ACTIVATING_TRANSCRIPTION_FACTOR_BINDING		35	0.17988141	0.56925774	0.95542634	0.9939034	1.0	7739	tags=29%, list=26%, signal=39%
GO_SYMPATHETIC_NERVOUS_SYSTEM_DEVELOPMENT	GO_SYMPATHETIC_NERVOUS_SYSTEM_DEVELOPMENT		20	0.20245762	0.5682267	0.9682836	0.99353623	1.0	8783	tags=35%, list=30%, signal=50%
GO_PHOSPHOLIPASE_C_ACTIVITY	GO_PHOSPHOLIPASE_C_ACTIVITY		31	0.1751699	0.5671439	0.96330273	0.993225	1.0	8042	tags=26%, list=27%, signal=35%
GO_REGULATION_OF_B_CELL_ACTIVATION	GO_REGULATION_OF_B_CELL_ACTIVATION		115	0.16925584	0.5670348	0.9071146	0.9923872	1.0	5937	tags=17%, list=20%, signal=22%
GO_EMBRYONIC_PATTERN_SPECIFICATION	GO_EMBRYONIC_PATTERN_SPECIFICATION		56	0.15970898	0.5626914	0.98630136	0.9936979	1.0	10650	tags=38%, list=36%, signal=59%
GO_REGULATION_OF_FATTY_ACID_BETA_OXIDATION	GO_REGULATION_OF_FATTY_ACID_BETA_OXIDATION		16	0.21206702	0.5621633	0.93359375	0.9930714	1.0	8285	tags=31%, list=28%, signal=43%
GO_POSITIVE_REGULATION_OF_GLYCOGEN_METABOLIC_PROCESS	GO_POSITIVE_REGULATION_OF_GLYCOGEN_METABOLIC_PROCESS		16	0.19779398	0.559694	0.95866144	0.9934208	1.0	8091	tags=31%, list=28%, signal=43%
GO_FC_GAMMA_RECEPTOR_SIGNALING_PATHWAY	GO_FC_GAMMA_RECEPTOR_SIGNALING_PATHWAY		91	0.17002256	0.55940336	0.93775934	0.99268043	1.0	6726	tags=21%, list=23%, signal=27%
GO_POSITIVE_REGULATION_OF_DNA_TEMPLATED_TRANSCRIPTION_INITIATION	GO_POSITIVE_REGULATION_OF_DNA_TEMPLATED_TRANSCRIPTION_INITIATION		24	0.17464703	0.5584665	0.9799197	0.99219817	1.0	8309	tags=25%, list=28%, signal=35%
GO_EPOXYGENASE_P450_PATHWAY	GO_EPOXYGENASE_P450_PATHWAY		18	0.23245011	0.5581698	0.8813906	0.9914631	1.0	5567	tags=22%, list=19%, signal=27%
GO_ADP_BINDING	GO_ADP_BINDING		32	0.16783139	0.55807996	0.9633911	0.9906259	1.0	11109	tags=34%, list=38%, signal=55%
GO_REGULATION_OF_CIRCADIAN_SLEEP_WAKE_CYCLE	GO_REGULATION_OF_CIRCADIAN_SLEEP_WAKE_CYCLE		20	0.18699951	0.5500478	0.9905482	0.99337393	1.0	8501	tags=30%, list=29%, signal=42%
GO_NEGATIVE_REGULATION_OF_EPIDERMIS_DEVELOPMENT	GO_NEGATIVE_REGULATION_OF_EPIDERMIS_DEVELOPMENT		16	0.19943763	0.53782415	0.97154474	0.99755216	1.0	166	tags=6%, list=1%, signal=6%
GO_ORGANIC_CATION_TRANSPORT	GO_ORGANIC_CATION_TRANSPORT		19	0.18415935	0.5373682	0.9753593	0.9968341	1.0	9424	tags=32%, list=32%, signal=46%
GO_NUCLEAR_TRANSCRIBED_MRNA_CATABOLIC_PROCESS_NONSENSE_MEDIATED_DECAY	GO_NUCLEAR_TRANSCRIBED_MRNA_CATABOLIC_PROCESS_NONSENSE_MEDIATED_DECAY		117	0.20447128	0.53526205	0.79837066	0.99669737	1.0	14103	tags=46%, list=48%, signal=88%
GO_ENTEROENDOCRINE_CELL_DIFFERENTIATION	GO_ENTEROENDOCRINE_CELL_DIFFERENTIATION		19	0.18740644	0.5296719	0.962963	0.9978553	1.0	10935	tags=37%, list=37%, signal=59%
GO_GLYCOSIDE_METABOLIC_PROCESS	GO_GLYCOSIDE_METABOLIC_PROCESS		16	0.19805898	0.52944934	0.9560878	0.9970447	1.0	2903	tags=13%, list=10%, signal=14%
GO_RIBOSOMAL_SMALL_SUBUNIT_ASSEMBLY	GO_RIBOSOMAL_SMALL_SUBUNIT_ASSEMBLY		16	0.24630825	0.52873814	0.87216496	0.9963983	1.0	1250	tags=6%, list=4%, signal=7%
GO_POSITIVE_REGULATION_OF_B_CELL_ACTIVATION	GO_POSITIVE_REGULATION_OF_B_CELL_ACTIVATION		80	0.16220391	0.5241778	0.9484127	0.9970451	1.0	5937	tags=19%, list=20%, signal=23%
GO_RESPONSE_TO_FOOD	GO_RESPONSE_TO_FOOD		16	0.1793254	0.52097243	0.97940075	0.9971792	1.0	13852	tags=56%, list=47%, signal=106%
GO_RIBOSOME_ASSEMBLY	GO_RIBOSOME_ASSEMBLY		51	0.1887781	0.51935005	0.86965376	0.99682087	1.0	12711	tags=45%, list=43%, signal=79%
GO_THYROID_GLAND_DEVELOPMENT	GO_THYROID_GLAND_DEVELOPMENT		25	0.15973026	0.5167152	0.9980769	0.99671924	1.0	13486	tags=52%, list=46%, signal=96%
GO_DRUG_TRANSPORT	GO_DRUG_TRANSPORT		25	0.1692646	0.5159934	0.984466	0.9960497	1.0	3991	tags=12%, list=14%, signal=14%
GO_RESPONSE_TO_VITAMIN_E	GO_RESPONSE_TO_VITAMIN_E		15	0.18182622	0.51513135	0.9881188	0.9954117	1.0	6725	tags=20%, list=23%, signal=26%
GO_TOXIN_TRANSPORT	GO_TOXIN_TRANSPORT		36	0.15038216	0.5146597	0.985447	0.9946822	1.0	7985	tags=19%, list=27%, signal=27%
GO_DRUG_TRANSPORTER_ACTIVITY	GO_DRUG_TRANSPORTER_ACTIVITY		20	0.16372347	0.49714234	0.97830373	0.9984534	1.0	13256	tags=45%, list=45%, signal=82%
GO_MITOCHONDRIAL_FUSION	GO_MITOCHONDRIAL_FUSION		17	0.16477795	0.48941946	0.982	0.9993333	1.0	4249	tags=12%, list=14%, signal=14%
GO_HISTONE_DEMETHYLASE_ACTIVITY	GO_HISTONE_DEMETHYLASE_ACTIVITY		24	0.17563367	0.48480383	0.9590164	0.9994113	1.0	5906	tags=17%, list=20%, signal=21%
GO_GLYCINE_METABOLIC_PROCESS	GO_GLYCINE_METABOLIC_PROCESS		18	0.18606544	0.47089309	0.96586347	1.0	1.0	10169	tags=33%, list=35%, signal=51%
GO_OXIDOREDUCTASE_ACTIVITY_ACTING_ON_PAIRED_DONORS_WITH_INCORPORATION_OR_REDUCTION_OF_MOLECULAR_OXYGEN_REDUCED_FLAVIN_OR_FLAVOPROTEIN_AS_ONE_DONOR_AND_INCORPORATION_OF_ONE_ATOM_OF_OXYGEN	GO_OXIDOREDUCTASE_ACTIVITY_ACTING_ON_PAIRED_DONORS_WITH_INCORPORATION_OR_REDUCTION_OF_MOLECULAR_OXYGEN_REDUCED_FLAVIN_OR_FLAVOPROTEIN_AS_ONE_DONOR_AND_INCORPORATION_OF_ONE_ATOM_OF_OXYGEN		25	0.17034446	0.4672713	0.97713095	1.0	1.0	5567	tags=16%, list=19%, signal=20%
GO_LIPID_TRANSLOCATION	GO_LIPID_TRANSLOCATION		21	0.163323	0.4656006	0.99615383	1.0	1.0	10428	tags=29%, list=35%, signal=44%
GO_CORNIFIED_ENVELOPE	GO_CORNIFIED_ENVELOPE		20	0.1912589	0.46504512	0.97604793	0.9993705	1.0	11490	tags=35%, list=39%, signal=57%
GO_INTRAMOLECULAR_OXIDOREDUCTASE_ACTIVITY_TRANSPOSING_S_S_BONDS	GO_INTRAMOLECULAR_OXIDOREDUCTASE_ACTIVITY_TRANSPOSING_S_S_BONDS		20	0.15753496	0.4437755	0.9878049	1.0	1.0	6674	tags=20%, list=23%, signal=26%
GO_REGULATION_OF_INTERFERON_GAMMA_BIOSYNTHETIC_PROCESS	GO_REGULATION_OF_INTERFERON_GAMMA_BIOSYNTHETIC_PROCESS		15	0.16091833	0.44292563	0.98913044	1.0	1.0	24683	tags=100%, list=84%, signal=621%
GO_CYTOPLASMIC_TRANSLATION	GO_CYTOPLASMIC_TRANSLATION		41	0.164811	0.43686107	0.95051545	1.0	1.0	7045	tags=17%, list=24%, signal=22%
GO_FAT_SOLUBLE_VITAMIN_METABOLIC_PROCESS	GO_FAT_SOLUBLE_VITAMIN_METABOLIC_PROCESS		30	0.12851383	0.43252087	0.9980276	0.9998098	1.0	5420	tags=13%, list=18%, signal=16%
GO_PHOSPHOLIPID_TRANSLOCATING_ATPASE_ACTIVITY	GO_PHOSPHOLIPID_TRANSLOCATING_ATPASE_ACTIVITY		16	0.16048154	0.42562443	0.9962335	0.9995123	1.0	24696	tags=100%, list=84%, signal=623%
GO_L_ALPHA_AMINO_ACID_TRANSMEMBRANE_TRANSPORT	GO_L_ALPHA_AMINO_ACID_TRANSMEMBRANE_TRANSPORT		30	0.13049282	0.42032072	1.0	0.9990685	1.0	8515	tags=23%, list=29%, signal=33%
GO_ANTIGEN_PROCESSING_AND_PRESENTATION_OF_EXOGENOUS_PEPTIDE_ANTIGEN_VIA_MHC_CLASS_I	GO_ANTIGEN_PROCESSING_AND_PRESENTATION_OF_EXOGENOUS_PEPTIDE_ANTIGEN_VIA_MHC_CLASS_I		65	0.1317051	0.38396198	0.9877301	1.0	1.0	10013	tags=28%, list=34%, signal=42%
GO_CYTOSOLIC_LARGE_RIBOSOMAL_SUBUNIT	GO_CYTOSOLIC_LARGE_RIBOSOMAL_SUBUNIT		60	0.16251983	0.35552463	0.92436975	1.0	1.0	15275	tags=57%, list=52%, signal=118%
GO_TRANSLATIONAL_INITIATION	GO_TRANSLATIONAL_INITIATION		142	0.12520842	0.3310615	0.96465695	0.999553	1.0	14810	tags=49%, list=50%, signal=99%
